# Supplementary material
Source: PubMed Central journal article supplement (PMC10857823)
Supplement: NIHMS1949735-supplement-Supplemental_table_1.pdf [file NIHMS1949735-supplement-Supplemental_table_1.pdf]

| Ensembl Gene ID    | Gene Name | log2(fold change) | p Value  | adj. p Value |
|--------------------|-----------|-------------------|----------|--------------|
| ENSMUSG00000052234 | Epx       | -3.031448011      | 3.05E-81 | 3.79E-77     |
| ENSMUSG00000072601 | Ear1      | -3.049117409      | 2.29E-52 | 1.42E-48     |
| ENSMUSG00000027073 | Prg2      | -2.189528323      | 1.76E-32 | 7.29E-29     |
| ENSMUSG00000060962 | Dmkn      | 1.186698362       | 3.18E-26 | 9.87E-23     |
| ENSMUSG00000056399 | Prss34    | -1.987427351      | 2.66E-25 | 6.61E-22     |
| ENSMUSG00000027072 | Prg3      | -2.330418743      | 1.04E-22 | 2.16E-19     |
| ENSMUSG00000062148 | Ear6      | -2.781238553      | 1.83E-22 | 2.84E-19     |
| ENSMUSG00000072596 | Ear2      | -2.731865632      | 1.81E-22 | 2.84E-19     |
| ENSMUSG00000089715 | Cbx6      | -1.908662305      | 3.76E-19 | 5.19E-16     |
| ENSMUSG00000000359 | Rem1      | -3.002726149      | 2.61E-17 | 3.24E-14     |
| ENSMUSG00000030154 | Klrb1f    | -1.509393903      | 2.67E-16 | 3.02E-13     |
| ENSMUSG00000031150 | Ccdc120   | 5.315063333       | 3.99E-16 | 4.13E-13     |
| ENSMUSG00000022037 | Clu       | 2.951984276       | 7.62E-16 | 6.76E-13     |
| ENSMUSG00000031074 | Fgf3      | -2.401657835      | 7.24E-16 | 6.76E-13     |
| ENSMUSG00000089901 | Gm8113    | -1.534711816      | 1.07E-15 | 8.86E-13     |
| ENSMUSG00000038352 | Arl5c     | -1.030847451      | 3.92E-15 | 3.04E-12     |
| ENSMUSG00000029752 | Asns      | 1.005902404       | 6.19E-15 | 4.52E-12     |
| ENSMUSG00000037455 | Slc18b1   | -4.317150161      | 6.53E-14 | 4.51E-11     |
| ENSMUSG00000083773 | Gm13394   | 10.50123013       | 2.30E-13 | 1.51E-10     |
| ENSMUSG00000028927 | Padi2     | -1.457341058      | 3.45E-13 | 2.14E-10     |
| ENSMUSG00000035493 | Tgfb1     | -1.399901835      | 3.74E-13 | 2.21E-10     |
| ENSMUSG00000064259 | Vmn1r13   | 1.011659317       | 8.15E-13 | 4.60E-10     |
| ENSMUSG00000036172 | Cd200r3   | -1.957216604      | 8.97E-13 | 4.84E-10     |
| ENSMUSG00000026822 | Lcn2      | 1.661308932       | 6.46E-12 | 3.34E-09     |
| ENSMUSG00000069516 | Lyz2      | -1.233913006      | 7.29E-12 | 3.62E-09     |
| ENSMUSG00000045658 | Pid1      | -2.482621246      | 1.06E-11 | 5.06E-09     |
| ENSMUSG00000030272 | Camk1     | -0.757815385      | 2.09E-11 | 9.63E-09     |
| ENSMUSG00000002985 | ApoE      | -1.264336103      | 3.33E-11 | 1.48E-08     |
| ENSMUSG00000029521 | Chek2     | -1.111596729      | 4.28E-11 | 1.83E-08     |
| ENSMUSG00000015337 | Endog     | 0.848617245       | 5.05E-11 | 2.09E-08     |
| ENSMUSG00000022157 | Mcpt8     | -1.100134691      | 1.06E-10 | 4.26E-08     |
| ENSMUSG00000023909 | Paqr4     | -1.642388106      | 1.59E-10 | 5.97E-08     |
| ENSMUSG00000044734 | Serp1b1a  | 0.76057764        | 1.57E-10 | 5.97E-08     |
| ENSMUSG00000019122 | Ccl9      | 0.68206577        | 1.97E-10 | 7.18E-08     |
| ENSMUSG00000029223 | Uchl1     | 4.66546592        | 4.11E-10 | 1.46E-07     |
| ENSMUSG00000062906 | Hdac10    | -1.101379217      | 7.38E-10 | 2.55E-07     |
| ENSMUSG00000068407 | Rnase12   | -1.249821078      | 1.37E-09 | 4.59E-07     |
| ENSMUSG00000015053 | Gata2     | -1.267570521      | 1.49E-09 | 4.87E-07     |
| ENSMUSG00000042284 | Itga1     | -1.132052897      | 1.66E-09 | 5.28E-07     |
| ENSMUSG00000039001 | Rps21     | 0.650114045       | 1.88E-09 | 5.85E-07     |
| ENSMUSG00000028124 | Gclm      | 0.771191442       | 2.60E-09 | 7.89E-07     |
| ENSMUSG00000031765 | Mt1       | 0.73177456        | 4.16E-09 | 1.23E-06     |

|                    |           |              |          |             |
|--------------------|-----------|--------------|----------|-------------|
| ENSMUSG00000051748 | Wfdc21    | 1.045745857  | 4.58E-09 | 1.32E-06    |
| ENSMUSG00000049422 | Chchd10   | 0.848973368  | 8.43E-09 | 2.38E-06    |
| ENSMUSG00000021263 | Degs2     | 2.889918957  | 9.16E-09 | 2.53E-06    |
| ENSMUSG00000045942 | BC049762  | 1.308758708  | 1.12E-08 | 3.01E-06    |
| ENSMUSG00000053687 | Dpep2     | -1.678328011 | 2.84E-08 | 7.51E-06    |
| ENSMUSG00000035629 | Rubcn     | -1.019573562 | 2.96E-08 | 7.65E-06    |
| ENSMUSG00000029149 | Krtcap3   | 1.312957419  | 3.13E-08 | 7.93E-06    |
| ENSMUSG00000048442 | Smim5     | -1.149101158 | 3.37E-08 | 8.37E-06    |
| ENSMUSG00000039611 | Tmem246   | -5.196185741 | 4.73E-08 | 1.15E-05    |
| ENSMUSG00000092345 | Gm20503   | 0.5449932    | 7.13E-08 | 1.70E-05    |
| ENSMUSG00000036587 | Fut7      | -0.70962206  | 7.53E-08 | 1.76E-05    |
| ENSMUSG00000033446 | Lpar6     | -0.726342303 | 7.82E-08 | 1.80E-05    |
| ENSMUSG00000063882 | Uqcrh     | 0.434541898  | 8.42E-08 | 1.90E-05    |
| ENSMUSG00000066378 | Gm10160   | -0.879355495 | 1.21E-07 | 2.67E-05    |
| ENSMUSG00000041096 | Tspyl2    | -0.956441164 | 1.44E-07 | 3.13E-05    |
| ENSMUSG00000038274 | Fau       | 0.498052091  | 2.16E-07 | 4.63E-05    |
| ENSMUSG00000052160 | Pld4      | -0.879212299 | 2.23E-07 | 4.69E-05    |
| ENSMUSG00000001281 | Itgb7     | -1.342770217 | 3.25E-07 | 6.74E-05    |
| ENSMUSG00000046768 | Rhoj      | 1.301621597  | 3.72E-07 | 7.57E-05    |
| ENSMUSG00000063506 | Arhgap22  | -4.430320062 | 3.79E-07 | 7.59E-05    |
| ENSMUSG00000009376 | Met       | -0.883811559 | 3.98E-07 | 7.85E-05    |
| ENSMUSG00000086583 | Gm15500   | 0.571142974  | 4.41E-07 | 8.56E-05    |
| ENSMUSG00000014599 | Csf1      | -1.242925738 | 4.73E-07 | 9.04E-05    |
| ENSMUSG00000029344 | Tpst2     | -0.485252975 | 6.27E-07 | 0.000118074 |
| ENSMUSG00000056737 | Capg      | -0.546871805 | 7.00E-07 | 0.000129767 |
| ENSMUSG00000052146 | Rps10     | 0.600606656  | 7.41E-07 | 0.000135355 |
| ENSMUSG00000048163 | Selplg    | -0.584059195 | 7.60E-07 | 0.000136723 |
| ENSMUSG00000022404 | Slc25a17  | 0.49621244   | 7.94E-07 | 0.000140931 |
| ENSMUSG00000029175 | Slc35f6   | -0.961566568 | 9.09E-07 | 0.000159018 |
| ENSMUSG00000058600 | Rpl30     | 0.513952644  | 9.30E-07 | 0.000160487 |
| ENSMUSG00000021880 | Rnase6    | -0.967228054 | 9.59E-07 | 0.000163228 |
| ENSMUSG00000061167 | Rpl15-ps3 | 0.458536508  | 9.85E-07 | 0.000165382 |
| ENSMUSG00000040026 | Saa3      | -0.713666683 | 1.12E-06 | 0.000185301 |
| ENSMUSG00000025137 | Pcyt2     | -0.512462734 | 1.15E-06 | 0.000187643 |
| ENSMUSG00000084106 | Gm6136    | 0.518285821  | 1.21E-06 | 0.000192853 |
| ENSMUSG00000087412 | Gm15501   | 0.457273811  | 1.20E-06 | 0.000192853 |
| ENSMUSG00000070803 | Cited4    | 0.691523206  | 1.35E-06 | 0.000212223 |
| ENSMUSG00000022105 | Rb1       | -0.704000455 | 1.38E-06 | 0.000215018 |
| ENSMUSG00000063457 | Rps15     | 0.408451581  | 1.46E-06 | 0.000224016 |
| ENSMUSG00000078965 | Gm12033   | 1.808474178  | 1.56E-06 | 0.000236737 |
| ENSMUSG00000030147 | Clec4b1   | -1.64895462  | 1.83E-06 | 0.000273486 |
| ENSMUSG00000050965 | Prkca     | -1.793946771 | 1.95E-06 | 0.000287635 |
| ENSMUSG00000020323 | Prss57    | 0.627668853  | 2.30E-06 | 0.000331874 |

|                    |            |              |          |             |
|--------------------|------------|--------------|----------|-------------|
| ENSMUSG00000075702 | Selenom    | 0.561203715  | 2.29E-06 | 0.000331874 |
| ENSMUSG00000037905 | Bri3bp     | 0.553844896  | 2.36E-06 | 0.000336339 |
| ENSMUSG00000022150 | Dab2       | 1.593825805  | 2.40E-06 | 0.000339301 |
| ENSMUSG00000050299 | Gm9843     | 0.46482658   | 2.45E-06 | 0.000341126 |
| ENSMUSG00000051378 | Kif18b     | -0.607645954 | 2.47E-06 | 0.000341126 |
| ENSMUSG00000028523 | Tctex1d1   | 0.566805636  | 2.61E-06 | 0.000355991 |
| ENSMUSG00000042978 | Sbk1       | -3.282280717 | 2.64E-06 | 0.000356528 |
| ENSMUSG00000011114 | Tbrg1      | 0.512112846  | 2.85E-06 | 0.000381163 |
| ENSMUSG00000023032 | Slc4a8     | 0.780247361  | 3.03E-06 | 0.000399777 |
| ENSMUSG00000005057 | Sh2b2      | -0.790305682 | 3.29E-06 | 0.000430485 |
| ENSMUSG00000034932 | Mrpl54     | 0.513359225  | 3.61E-06 | 0.000462195 |
| ENSMUSG00000057230 | Aak1       | -1.884302502 | 3.59E-06 | 0.000462195 |
| ENSMUSG00000034792 | Gna15      | -0.751207222 | 3.69E-06 | 0.000463444 |
| ENSMUSG00000060419 | Rps16-ps2  | 0.406436488  | 3.69E-06 | 0.000463444 |
| ENSMUSG00000031722 | Hp         | 0.406545532  | 3.80E-06 | 0.000471923 |
| ENSMUSG00000117141 | AC154486.2 | -0.729406574 | 3.97E-06 | 0.000488118 |
| ENSMUSG00000051517 | Arhgef39   | -0.501954057 | 4.21E-06 | 0.000512098 |
| ENSMUSG00000021024 | Psmc6      | 0.397712663  | 4.31E-06 | 0.000514899 |
| ENSMUSG00000028798 | Eif3i      | 0.510852707  | 4.28E-06 | 0.000514899 |
| ENSMUSG00000026385 | Dbi        | 0.363556103  | 4.63E-06 | 0.000547322 |
| ENSMUSG00000020372 | Rack1      | 0.513841313  | 4.90E-06 | 0.00057362  |
| ENSMUSG00000001134 | Uxt        | 0.562213279  | 5.74E-06 | 0.000646834 |
| ENSMUSG00000006360 | Crip1      | -0.816640126 | 5.58E-06 | 0.000646834 |
| ENSMUSG00000029863 | Casp2      | -0.93854527  | 5.66E-06 | 0.000646834 |
| ENSMUSG00000055762 | Eef1d      | 0.499178077  | 5.75E-06 | 0.000646834 |
| ENSMUSG00000110990 | AC137605.1 | 0.566799921  | 5.78E-06 | 0.000646834 |
| ENSMUSG00000037759 | Ptger2     | -0.877597615 | 5.84E-06 | 0.000647467 |
| ENSMUSG00000003355 | Fkbp11     | 0.834356284  | 5.92E-06 | 0.000651124 |
| ENSMUSG00000024782 | Ak3        | -0.520922184 | 6.28E-06 | 0.000684522 |
| ENSMUSG00000020077 | Srgn       | 0.610706919  | 6.53E-06 | 0.000693383 |
| ENSMUSG00000028378 | Ptgr1      | 0.675339831  | 6.52E-06 | 0.000693383 |
| ENSMUSG00000028420 | Tmem38b    | 0.604980339  | 6.47E-06 | 0.000693383 |
| ENSMUSG00000033427 | Upb1       | -2.802423286 | 6.70E-06 | 0.000705266 |
| ENSMUSG00000028459 | Cd72       | -1.101738706 | 7.16E-06 | 0.000744664 |
| ENSMUSG00000041754 | Trem3      | 0.578871239  | 7.25E-06 | 0.000744664 |
| ENSMUSG00000045868 | Gvin1      | 1.176912171  | 7.22E-06 | 0.000744664 |
| ENSMUSG00000061315 | Naca       | 0.458950449  | 7.34E-06 | 0.000747308 |
| ENSMUSG00000030427 | Lilra6     | -2.186754827 | 7.74E-06 | 0.000781426 |
| ENSMUSG00000040314 | Ctsg       | 0.567915297  | 8.10E-06 | 0.000805875 |
| ENSMUSG00000074863 | Platr25    | -0.629431947 | 8.11E-06 | 0.000805875 |
| ENSMUSG00000024680 | Ms4a2      | -1.083835484 | 8.34E-06 | 0.000822247 |
| ENSMUSG00000078126 | Rpl23a-ps3 | 0.387162849  | 9.40E-06 | 0.000919471 |
| ENSMUSG00000061904 | Slc25a3    | 0.444191847  | 9.78E-06 | 0.000948653 |

|                    |           |              |          |             |
|--------------------|-----------|--------------|----------|-------------|
| ENSMUSG00000033382 | Trappc8   | -0.946127074 | 9.89E-06 | 0.000952401 |
| ENSMUSG00000020151 | Ptpr      | 1.098063663  | 1.00E-05 | 0.000955317 |
| ENSMUSG00000037563 | Rps16     | 0.396464175  | 1.04E-05 | 0.000982616 |
| ENSMUSG00000068129 | Cst7      | 0.496730664  | 1.07E-05 | 0.001000393 |
| ENSMUSG00000082809 | Gm14150   | 1.550217736  | 1.06E-05 | 0.001000393 |
| ENSMUSG00000024681 | Ms4a3     | 0.562407104  | 1.08E-05 | 0.001002366 |
| ENSMUSG00000022708 | Zbtb20    | -1.624807522 | 1.11E-05 | 0.001020187 |
| ENSMUSG00000038178 | Slc43a2   | -0.885333395 | 1.14E-05 | 0.001036934 |
| ENSMUSG00000000693 | Loxl3     | -1.594974276 | 1.17E-05 | 0.001054555 |
| ENSMUSG00000001150 | Mcm3ap    | 0.965416308  | 1.17E-05 | 0.001054555 |
| ENSMUSG00000072600 | Ear-ps9   | -2.481075435 | 1.18E-05 | 0.001054555 |
| ENSMUSG00000026921 | Egfl7     | 0.727630326  | 1.20E-05 | 0.001061322 |
| ENSMUSG00000081603 | Gm14681   | 0.58333753   | 1.21E-05 | 0.001067734 |
| ENSMUSG00000001986 | Gria3     | -0.580620753 | 1.32E-05 | 0.001143316 |
| ENSMUSG00000028159 | Dapp1     | -0.404198515 | 1.32E-05 | 0.001143316 |
| ENSMUSG00000081999 | Gm13461   | 0.493068235  | 1.33E-05 | 0.001143316 |
| ENSMUSG00000051177 | Plcb1     | -0.885716735 | 1.39E-05 | 0.001188944 |
| ENSMUSG00000025487 | Psmid13   | 0.36676886   | 1.50E-05 | 0.001272164 |
| ENSMUSG00000025364 | Pa2g4     | 0.734076385  | 1.58E-05 | 0.001337153 |
| ENSMUSG00000026509 | Capn2     | -1.416262548 | 1.66E-05 | 0.001381426 |
| ENSMUSG00000094257 | Ap3s1-ps2 | 1.970011329  | 1.65E-05 | 0.001381426 |
| ENSMUSG00000063229 | Ldha      | 0.572595045  | 1.95E-05 | 0.001617494 |
| ENSMUSG00000021948 | Prkcd     | -0.542425083 | 1.98E-05 | 0.001629472 |
| ENSMUSG00000028647 | Mycbp     | 0.481722405  | 2.03E-05 | 0.001660156 |
| ENSMUSG00000032480 | Dhx30     | -0.537079255 | 2.14E-05 | 0.0017399   |
| ENSMUSG00000068417 | Pnp2      | 0.646014142  | 2.26E-05 | 0.001826529 |
| ENSMUSG00000051373 | Plpp7     | -1.200583331 | 2.30E-05 | 0.001840657 |
| ENSMUSG00000057113 | Npm1      | 0.622487752  | 2.32E-05 | 0.001844216 |
| ENSMUSG00000025794 | Rpl14     | 0.348881534  | 2.54E-05 | 0.001967883 |
| ENSMUSG00000026458 | Ppfia4    | -0.943434923 | 2.53E-05 | 0.001967883 |
| ENSMUSG00000031749 | St3gal2   | -1.218932234 | 2.55E-05 | 0.001967883 |
| ENSMUSG00000031858 | Mau2      | -0.485579879 | 2.55E-05 | 0.001967883 |
| ENSMUSG00000069682 | Gm10275   | 0.429493289  | 2.51E-05 | 0.001967883 |
| ENSMUSG00000060073 | Psma3     | 0.459241928  | 2.60E-05 | 0.001996732 |
| ENSMUSG00000022354 | Ndufb9    | 0.356198348  | 2.64E-05 | 0.002001699 |
| ENSMUSG00000031309 | Rps6ka3   | 1.709174014  | 2.63E-05 | 0.002001699 |
| ENSMUSG00000083669 | Gm10169   | 0.535956866  | 2.68E-05 | 0.002019632 |
| ENSMUSG00000028029 | Aimp1     | 0.423824571  | 2.72E-05 | 0.002020679 |
| ENSMUSG00000046295 | Ankle1    | -0.607214071 | 2.73E-05 | 0.002020679 |
| ENSMUSG00000050075 | Gpr171    | -0.541149255 | 2.70E-05 | 0.002020679 |
| ENSMUSG00000025630 | Hprt      | 0.409844226  | 2.78E-05 | 0.002046483 |
| ENSMUSG00000005506 | Celf1     | -0.643604374 | 2.83E-05 | 0.002064686 |
| ENSMUSG00000004207 | Psap      | -0.850326913 | 2.88E-05 | 0.002078424 |

|                    |            |              |          |             |
|--------------------|------------|--------------|----------|-------------|
| ENSMUSG00000107333 | Gm43008    | 0.985136133  | 2.87E-05 | 0.002078424 |
| ENSMUSG00000029470 | P2rx4      | -0.513519667 | 2.94E-05 | 0.002112329 |
| ENSMUSG00000020101 | Vsir       | -0.555782598 | 3.03E-05 | 0.00216431  |
| ENSMUSG00000030117 | Gdf3       | -0.908438659 | 3.06E-05 | 0.002170603 |
| ENSMUSG00000004952 | Rasa4      | -0.578129907 | 3.17E-05 | 0.002237845 |
| ENSMUSG00000024659 | Anxa1      | 0.470236218  | 3.22E-05 | 0.002256565 |
| ENSMUSG00000086922 | Gm13835    | 0.45771597   | 3.27E-05 | 0.002279675 |
| ENSMUSG00000032849 | Abcc4      | 0.62762584   | 3.34E-05 | 0.002307792 |
| ENSMUSG00000058638 | Zfp110     | -0.646105012 | 3.34E-05 | 0.002307792 |
| ENSMUSG00000004264 | Phb2       | 0.427848597  | 3.37E-05 | 0.002309321 |
| ENSMUSG00000042367 | Gjb3       | 0.985643062  | 3.60E-05 | 0.002418024 |
| ENSMUSG00000046006 | Gapt       | -0.620387392 | 3.59E-05 | 0.002418024 |
| ENSMUSG00000061536 | Sec22c     | 0.848177389  | 3.57E-05 | 0.002418024 |
| ENSMUSG00000110057 | Gm2225     | 0.568515553  | 3.56E-05 | 0.002418024 |
| ENSMUSG00000001062 | Vps9d1     | -1.08672747  | 3.63E-05 | 0.002422354 |
| ENSMUSG00000024137 | E4f1       | -0.542702039 | 3.65E-05 | 0.002425771 |
| ENSMUSG00000033307 | Mif        | 0.506606909  | 3.70E-05 | 0.002444817 |
| ENSMUSG00000026281 | Dtymk      | 0.36715815   | 3.75E-05 | 0.002461981 |
| ENSMUSG00000024679 | Ms4a6d     | 0.572095094  | 3.79E-05 | 0.002474469 |
| ENSMUSG00000027999 | Pla2g12a   | 0.491182747  | 3.94E-05 | 0.002559093 |
| ENSMUSG00000024818 | Slc25a45   | -0.737457105 | 4.02E-05 | 0.002599977 |
| ENSMUSG00000058486 | Wdr91      | -0.838608928 | 4.20E-05 | 0.002704135 |
| ENSMUSG00000043483 | Gm6863     | 0.388642737  | 4.31E-05 | 0.002727517 |
| ENSMUSG00000059013 | Sh2d3c     | -0.735042209 | 4.28E-05 | 0.002727517 |
| ENSMUSG00000071141 | Rpl36a-ps3 | 0.325877373  | 4.33E-05 | 0.002727517 |
| ENSMUSG00000080921 | Rpl38-ps2  | 0.386672971  | 4.30E-05 | 0.002727517 |
| ENSMUSG00000070493 | Chchd2     | 0.333509355  | 4.45E-05 | 0.002781868 |
| ENSMUSG00000100755 | Rps23-ps1  | 0.349201793  | 4.46E-05 | 0.002781868 |
| ENSMUSG00000035443 | Thyn1      | 0.401755999  | 4.51E-05 | 0.002798934 |
| ENSMUSG00000020732 | Rab37      | -0.817422766 | 4.54E-05 | 0.002802589 |
| ENSMUSG00000044424 | Gm9493     | 0.393522854  | 4.58E-05 | 0.002803192 |
| ENSMUSG00000080848 | Gm9385     | 0.45475746   | 4.57E-05 | 0.002803192 |
| ENSMUSG00000041801 | Phlda3     | -1.448832813 | 4.68E-05 | 0.002851274 |
| ENSMUSG00000050335 | Lgals3     | -0.716808908 | 4.71E-05 | 0.002855104 |
| ENSMUSG00000020520 | Galnt10    | -0.519961193 | 4.74E-05 | 0.002857948 |
| ENSMUSG00000040112 | Mrps35     | 0.464009311  | 4.83E-05 | 0.002897596 |
| ENSMUSG00000073640 | Rpl27-ps3  | 0.459200506  | 5.01E-05 | 0.002992987 |
| ENSMUSG00000007892 | Rplp1      | 0.318292708  | 5.13E-05 | 0.003029165 |
| ENSMUSG00000026914 | Psm14      | 0.358086797  | 5.15E-05 | 0.003029165 |
| ENSMUSG00000079478 | Sssca1     | 0.520921291  | 5.14E-05 | 0.003029165 |
| ENSMUSG00000039640 | Mrpl12     | 0.388753364  | 5.19E-05 | 0.003031517 |
| ENSMUSG00000045455 | Gm9797     | 0.388828255  | 5.20E-05 | 0.003031517 |
| ENSMUSG00000024777 | Ppp2r5b    | -1.188073195 | 5.37E-05 | 0.003117055 |

|                    |               |              |             |             |
|--------------------|---------------|--------------|-------------|-------------|
| ENSMUSG00000028936 | Rpl22         | 0.446245327  | 5.44E-05    | 0.003128489 |
| ENSMUSG00000038510 | Rpf2          | 0.401039629  | 5.44E-05    | 0.003128489 |
| ENSMUSG00000022338 | Eny2          | 0.408437043  | 5.56E-05    | 0.003182505 |
| ENSMUSG00000061731 | Ext1          | -0.882979753 | 5.78E-05    | 0.003292641 |
| ENSMUSG00000021710 | Nln           | 0.723744498  | 6.02E-05    | 0.003390555 |
| ENSMUSG00000027165 | B230118H07Rik | 0.42266671   | 6.09E-05    | 0.003390555 |
| ENSMUSG00000030647 | Ndufc2        | 0.370239605  | 6.09E-05    | 0.003390555 |
| ENSMUSG00000053483 | Usp21         | -0.532506365 | 6.05E-05    | 0.003390555 |
| ENSMUSG00000057388 | Mrpl18        | 0.370124872  | 6.04E-05    | 0.003390555 |
| ENSMUSG00000021660 | Btf3          | 0.542885288  | 6.20E-05    | 0.003439259 |
| ENSMUSG00000000078 | Klf6          | -0.55506239  | 6.27E-05    | 0.003458871 |
| ENSMUSG00000016494 | Cd34          | -0.610556965 | 6.31E-05    | 0.003466954 |
| ENSMUSG00000024084 | Qpct          | -0.898479387 | 6.37E-05    | 0.00346863  |
| ENSMUSG00000041977 | Arhgef11      | -1.339212175 | 6.35E-05    | 0.00346863  |
| ENSMUSG00000081406 | Rps6-ps4      | 0.341476765  | 6.41E-05    | 0.003476763 |
| ENSMUSG00000021254 | Gpatch2l      | -0.619240604 | 6.57E-05    | 0.003550362 |
| ENSMUSG00000029446 | Psph          | 0.45327385   | 6.96E-05    | 0.003740564 |
| ENSMUSG00000038718 | Pbx3          | -1.381240413 | 7.06E-05    | 0.003781544 |
| ENSMUSG00000053113 | Socs3         | 3.272357086  | 7.19E-05    | 0.003834749 |
| ENSMUSG00000085342 | Gm12254       | 0.500796798  | 7.29E-05    | 0.003867295 |
| ENSMUSG00000026492 | Tfb2m         | 0.417891108  | 7.43E-05    | 0.003925399 |
| ENSMUSG00000025762 | Larp1b        | 1.52708819   | 7.47E-05    | 0.003930843 |
| ENSMUSG00000021575 | Ahrr          | -2.13438664  | 7.54E-05    | 0.003950925 |
| ENSMUSG00000018821 | Avpi1         | 0.554531398  | 7.61E-05    | 0.003955869 |
| ENSMUSG00000062713 | Sim2          | 2.2213002    | 7.61E-05    | 0.003955869 |
| ENSMUSG00000070501 | Ifi214        | -0.846495059 | 7.72E-05    | 0.003997858 |
| ENSMUSG00000008333 | Snrpb2        | 0.391897276  | 8.29E-05    | 0.004247951 |
| ENSMUSG00000031799 | Tpm4          | -0.567308448 | 8.26E-05    | 0.004247951 |
| ENSMUSG00000067161 | Gm5560        | 1.211011668  | 8.31E-05    | 0.004247951 |
| ENSMUSG00000105388 | Rpl36a-ps2    | 0.385860322  | 8.58E-05    | 0.004369395 |
| ENSMUSG00000006333 | Rps9          | 0.397052909  | 8.65E-05    | 0.004385249 |
| ENSMUSG00000061477 | Rps7          | 0.377897907  | 8.70E-05    | 0.004395033 |
| ENSMUSG00000004730 | Adgre1        | -1.171855345 | 8.82E-05    | 0.004418143 |
| ENSMUSG00000025950 | ldh1          | -0.4773549   | 8.86E-05    | 0.004418143 |
| ENSMUSG00000036006 | Ripor2        | -0.626432303 | 8.84E-05    | 0.004418143 |
| ENSMUSG00000019699 | Akt3          | 2.699633949  | 9.17E-05    | 0.004555146 |
| ENSMUSG00000031586 | Rbpms         | -0.853638233 | 9.23E-05    | 0.00456801  |
| ENSMUSG00000006611 | Hfe           | 0.50203253   | 9.45E-05    | 0.004660303 |
| ENSMUSG00000078713 | Tomm5         | 0.42082245   | 9.58E-05    | 0.004703854 |
| ENSMUSG00000092358 | Gm20430       | 0.429142888  | 9.72E-05    | 0.004750931 |
| ENSMUSG00000031381 | Piga          | 0.676784355  | 9.76E-05    | 0.004753696 |
| ENSMUSG00000030711 | Sult1a1       | -0.941462058 | 9.80E-05    | 0.004756529 |
| ENSMUSG00000037646 | Vps13b        | -0.966695809 | 0.000101687 | 0.004914588 |

|                    |               |              |             |             |
|--------------------|---------------|--------------|-------------|-------------|
| ENSMUSG00000021143 | Pacs2         | -0.884031066 | 0.000103507 | 0.004983183 |
| ENSMUSG00000017417 | Plxdc1        | -1.309523469 | 0.000108899 | 0.005144531 |
| ENSMUSG00000025330 | Padi4         | -0.748784995 | 0.00010788  | 0.005144531 |
| ENSMUSG00000025508 | Rplp2         | 0.375003047  | 0.000108637 | 0.005144531 |
| ENSMUSG00000049643 | 2310022A10Rik | -0.619072601 | 0.000108929 | 0.005144531 |
| ENSMUSG00000052192 | Gm5963        | 0.695335424  | 0.000107389 | 0.005144531 |
| ENSMUSG00000018770 | Atp5g3        | 0.573591886  | 0.000114612 | 0.005372067 |
| ENSMUSG00000055675 | Kbtbd11       | -0.06939905  | 0.000114551 | 0.005372067 |
| ENSMUSG00000022587 | Ly6e          | -0.418162271 | 0.000116971 | 0.005462005 |
| ENSMUSG00000058818 | Pirb          | -0.979999148 | 0.000117837 | 0.00548186  |
| ENSMUSG00000056666 | Retsat        | 0.445536338  | 0.000120376 | 0.005560425 |
| ENSMUSG00000075420 | Smim6         | 1.037907785  | 0.000120421 | 0.005560425 |
| ENSMUSG00000026854 | Usp20         | -0.883126787 | 0.000121654 | 0.005596536 |
| ENSMUSG00000041736 | Tspo          | 0.28530695   | 0.000123256 | 0.005649314 |
| ENSMUSG00000060477 | Irak2         | -0.997897433 | 0.000123816 | 0.005654103 |
| ENSMUSG00000018819 | Lsp1          | -0.78949306  | 0.000124806 | 0.005658936 |
| ENSMUSG00000047675 | Rps8          | 0.390319219  | 0.000124833 | 0.005658936 |
| ENSMUSG00000034156 | Tspoap1       | -0.703696022 | 0.000128833 | 0.005819016 |
| ENSMUSG00000031633 | Slc25a4       | 0.330481532  | 0.000132068 | 0.005943547 |
| ENSMUSG00000029994 | Anxa4         | -0.582961373 | 0.000133455 | 0.00598427  |
| ENSMUSG00000024947 | Men1          | -0.577496463 | 0.00013502  | 0.006011052 |
| ENSMUSG00000053286 | Trmt1l        | -0.396411954 | 0.000134667 | 0.006011052 |
| ENSMUSG00000062647 | Rpl7a         | 0.660143924  | 0.000136495 | 0.006055005 |
| ENSMUSG00000020267 | Hint1         | 0.319541908  | 0.000137881 | 0.006094718 |
| ENSMUSG00000028247 | Coq3          | 0.418509398  | 0.000139784 | 0.006123714 |
| ENSMUSG00000037466 | Tedc1         | -0.604632789 | 0.000139308 | 0.006123714 |
| ENSMUSG00000039007 | Cpq           | -0.559739744 | 0.00014034  | 0.006123714 |
| ENSMUSG00000040940 | Arhgef1       | -0.547064997 | 0.000140509 | 0.006123714 |
| ENSMUSG00000018446 | C1qbp         | 0.392114392  | 0.000141456 | 0.006143438 |
| ENSMUSG00000041112 | Elmo1         | -0.369454909 | 0.000142834 | 0.006181668 |
| ENSMUSG00000067194 | Eif1ax        | 0.298102169  | 0.000143382 | 0.006183857 |
| ENSMUSG00000032580 | Rbm5          | -0.390233964 | 0.000144796 | 0.006201783 |
| ENSMUSG00000046598 | Bdh1          | 1.356966774  | 0.000144746 | 0.006201783 |
| ENSMUSG00000094664 | Rpl35a-ps6    | 0.431694418  | 0.000148352 | 0.006332244 |
| ENSMUSG00000024397 | Aif1          | -1.061383669 | 0.000151163 | 0.006430127 |
| ENSMUSG00000032380 | Dapk2         | -1.892352339 | 0.000152447 | 0.006462602 |
| ENSMUSG00000059040 | Eno1b         | 0.886625957  | 0.000153962 | 0.006504652 |
| ENSMUSG00000025428 | Atp5a1        | 0.324996123  | 0.000156031 | 0.006525476 |
| ENSMUSG00000042675 | Ypel3         | -0.555261535 | 0.000155769 | 0.006525476 |
| ENSMUSG00000063200 | Nol7          | 0.372026696  | 0.000155334 | 0.006525476 |
| ENSMUSG00000038524 | Fchsd1        | -1.557549004 | 0.000157008 | 0.006544291 |
| ENSMUSG00000029430 | Ran           | 0.379588487  | 0.00015859  | 0.006584438 |
| ENSMUSG00000067235 | H2-Q10        | -0.978890777 | 0.000159032 | 0.006584438 |

|                    |               |              |             |             |
|--------------------|---------------|--------------|-------------|-------------|
| ENSMUSG00000012405 | Rpl15         | 0.449801949  | 0.000160816 | 0.006592406 |
| ENSMUSG00000033845 | Mrpl15        | 0.349138099  | 0.000160485 | 0.006592406 |
| ENSMUSG00000081094 | Rpl19-ps11    | 0.358054174  | 0.000160358 | 0.006592406 |
| ENSMUSG00000024426 | Atat1         | -0.816819387 | 0.00016148  | 0.006597832 |
| ENSMUSG00000010057 | Nprl2         | -0.457557911 | 0.000163172 | 0.006623377 |
| ENSMUSG00000084113 | Gm14277       | 0.537274346  | 0.000162922 | 0.006623377 |
| ENSMUSG00000078485 | Plekhn1       | -0.539423549 | 0.00016536  | 0.00669036  |
| ENSMUSG00000026701 | Prdx6         | 0.32480475   | 0.000166105 | 0.00669867  |
| ENSMUSG00000032369 | Plscr1        | 0.577082286  | 0.000169143 | 0.006799105 |
| ENSMUSG00000055296 | Tmem245       | -0.506837309 | 0.00017275  | 0.006921684 |
| ENSMUSG00000028467 | Gba2          | -0.729590186 | 0.000174544 | 0.006971103 |
| ENSMUSG00000089942 | Pira2         | -1.740209391 | 0.000175751 | 0.00699681  |
| ENSMUSG00000022913 | Psmg1         | 0.420120901  | 0.000176981 | 0.00702149  |
| ENSMUSG00000073481 | Marc2         | 0.369993344  | 0.000177502 | 0.00702149  |
| ENSMUSG00000018340 | Anxa6         | -0.467788647 | 0.000178743 | 0.007048141 |
| ENSMUSG00000024824 | Rad9a         | -0.353913944 | 0.000180884 | 0.00711002  |
| ENSMUSG00000024382 | Ercc3         | 0.515667006  | 0.000182025 | 0.007123086 |
| ENSMUSG00000032855 | Pkd1          | -0.97901525  | 0.000182364 | 0.007123086 |
| ENSMUSG00000049751 | Rpl36a1       | 0.306392113  | 0.000185902 | 0.007193422 |
| ENSMUSG00000057729 | Prtn3         | 0.409024784  | 0.000185188 | 0.007193422 |
| ENSMUSG00000083364 | Llph-ps2      | 0.417848448  | 0.000185693 | 0.007193422 |
| ENSMUSG00000074656 | Eif2s2        | 0.473513844  | 0.0001867   | 0.007201862 |
| ENSMUSG00000025377 | Tepsin        | -0.64710286  | 0.000190668 | 0.007287031 |
| ENSMUSG00000025907 | Rb1cc1        | -0.384544831 | 0.000190322 | 0.007287031 |
| ENSMUSG00000086322 | E130218I03Rik | 0.620131671  | 0.000190327 | 0.007287031 |
| ENSMUSG00000024276 | Zfp397        | -0.478960458 | 0.000193092 | 0.007319305 |
| ENSMUSG00000030652 | Coq7          | 0.433581857  | 0.00019328  | 0.007319305 |
| ENSMUSG00000082064 | Rpl5-ps2      | 1.691356409  | 0.000193243 | 0.007319305 |
| ENSMUSG00000036555 | lqce          | -0.682808477 | 0.000195854 | 0.007394228 |
| ENSMUSG00000038965 | Ube2l3        | 0.345832888  | 0.000199796 | 0.007520204 |
| ENSMUSG00000000711 | Rab5b         | -0.543755671 | 0.000202826 | 0.007578194 |
| ENSMUSG00000029066 | Mrpl20        | 0.395821683  | 0.000204387 | 0.007578194 |
| ENSMUSG00000030144 | Clec4d        | 0.679579557  | 0.000203401 | 0.007578194 |
| ENSMUSG00000038608 | Dock10        | -0.455432195 | 0.000203781 | 0.007578194 |
| ENSMUSG00000052031 | Tagap1        | -0.565936396 | 0.000203577 | 0.007578194 |
| ENSMUSG00000042354 | Gnl3          | 0.407330598  | 0.000207276 | 0.007653473 |
| ENSMUSG00000069972 | Rps13-ps2     | 0.475218047  | 0.00020765  | 0.007653473 |
| ENSMUSG00000069622 | Gm10273       | 0.390318197  | 0.000211297 | 0.007764839 |
| ENSMUSG00000027199 | Gatm          | 0.378251671  | 0.000213725 | 0.007807879 |
| ENSMUSG00000036112 | Metap2        | 0.46306112   | 0.000213458 | 0.007807879 |
| ENSMUSG00000083022 | Rps15a-ps6    | 0.642101508  | 0.000214639 | 0.007818257 |
| ENSMUSG00000022974 | Paxbp1        | -0.542894404 | 0.000216931 | 0.007878671 |
| ENSMUSG00000036864 | Proser3       | -0.748303226 | 0.000218946 | 0.007928667 |

|                    |               |              |             |             |
|--------------------|---------------|--------------|-------------|-------------|
| ENSMUSG00000046721 | Rpl14-ps1     | 0.329189087  | 0.000224311 | 0.008099334 |
| ENSMUSG00000098274 | Rpl24         | 0.462257782  | 0.000229131 | 0.008249377 |
| ENSMUSG00000042249 | Grk3          | -0.645859197 | 0.000237408 | 0.008522662 |
| ENSMUSG00000030214 | Plbd1         | -1.629608589 | 0.000241533 | 0.008632907 |
| ENSMUSG00000031762 | Mt2           | 1.655901883  | 0.000242378 | 0.008632907 |
| ENSMUSG00000031875 | Cmtm3         | -0.481787095 | 0.000242564 | 0.008632907 |
| ENSMUSG00000020682 | Mmp28         | -0.629204513 | 0.000243846 | 0.008653734 |
| ENSMUSG00000116620 | Gm4828        | 1.193346163  | 0.000246914 | 0.008737662 |
| ENSMUSG00000010362 | Rdm1          | -0.431236995 | 0.000250968 | 0.008855894 |
| ENSMUSG00000038323 | 1700066M21Rik | 0.670594354  | 0.000252835 | 0.008896514 |
| ENSMUSG00000012848 | Rps5          | 0.35090323   | 0.00025517  | 0.008953307 |
| ENSMUSG00000028060 | Khdc4         | -0.397630313 | 0.000257418 | 0.008981422 |
| ENSMUSG00000029614 | Rpl6          | 0.474325106  | 0.000256873 | 0.008981422 |
| ENSMUSG00000006920 | Ezh1          | -0.612620457 | 0.00025986  | 0.009041228 |
| ENSMUSG00000022761 | Lztr1         | -0.328967731 | 0.00026457  | 0.009144517 |
| ENSMUSG00000029816 | GpnmB         | 2.120049992  | 0.000265037 | 0.009144517 |
| ENSMUSG00000030630 | Fah           | 2.772100516  | 0.000264099 | 0.009144517 |
| ENSMUSG00000005339 | Fcer1a        | -0.913993003 | 0.000266975 | 0.009185862 |
| ENSMUSG00000062867 | Impdh2        | 0.428721408  | 0.000268313 | 0.009206392 |
| ENSMUSG00000032845 | Alpk2         | -0.427111095 | 0.000271241 | 0.009255993 |
| ENSMUSG00000081051 | Gm15427       | 0.775907125  | 0.000271249 | 0.009255993 |
| ENSMUSG00000060636 | Rpl35a        | 0.408300148  | 0.000272984 | 0.009289682 |
| ENSMUSG00000048758 | Rpl29         | 0.423893343  | 0.000274517 | 0.009316312 |
| ENSMUSG00000039759 | Thap3         | -0.446170353 | 0.000275323 | 0.009318211 |
| ENSMUSG00000020386 | Sar1b         | 0.369352649  | 0.000282448 | 0.009481842 |
| ENSMUSG00000046314 | Stxbp6        | -1.186035153 | 0.00028216  | 0.009481842 |
| ENSMUSG00000068551 | Zfp467        | -1.015369182 | 0.000281154 | 0.009481842 |
| ENSMUSG00000019820 | Utrn          | -0.609039061 | 0.00028914  | 0.009680351 |
| ENSMUSG00000021606 | Ndufs6        | 0.333168033  | 0.00029023  | 0.00969073  |
| ENSMUSG00000034177 | Rnf43         | -1.236932686 | 0.000294008 | 0.009770778 |
| ENSMUSG00000042594 | Sh2b3         | -0.73069656  | 0.000294201 | 0.009770778 |
| ENSMUSG00000032740 | Ccdc88a       | -0.681983648 | 0.000297408 | 0.009850962 |
| ENSMUSG00000037112 | Sik2          | -0.644903866 | 0.000298275 | 0.009853399 |
| ENSMUSG00000035392 | Dennd1a       | -0.779133778 | 0.000300355 | 0.009895789 |
| ENSMUSG00000006095 | Tbcb          | 0.362048585  | 0.00030526  | 0.010024171 |
| ENSMUSG00000030223 | Ptpro         | -0.905514333 | 0.000305866 | 0.010024171 |
| ENSMUSG00000069833 | Ahnak         | -0.745147108 | 0.000306878 | 0.010030865 |
| ENSMUSG00000021485 | Mxd3          | -0.698542424 | 0.000307691 | 0.010031065 |
| ENSMUSG00000032175 | Tyk2          | -0.389224265 | 0.000308909 | 0.010038931 |
| ENSMUSG00000045679 | Pqlc3         | -0.544441415 | 0.000309549 | 0.010038931 |
| ENSMUSG00000070343 | Gm10288       | 0.376233505  | 0.000312647 | 0.010112985 |
| ENSMUSG00000028015 | Ctso          | -0.40291788  | 0.000315846 | 0.010189933 |
| ENSMUSG00000037787 | Apopt1        | 0.320097363  | 0.000320435 | 0.010311215 |

|                    |               |              |             |             |
|--------------------|---------------|--------------|-------------|-------------|
| ENSMUSG00000032518 | Rpsa          | 0.430887363  | 0.000334109 | 0.010723433 |
| ENSMUSG00000006362 | Cbfa2t3       | -0.685200666 | 0.000342027 | 0.010944275 |
| ENSMUSG00000027333 | Smox          | -0.882009896 | 0.000343633 | 0.010944275 |
| ENSMUSG00000040351 | Ankib1        | -0.514853482 | 0.000343497 | 0.010944275 |
| ENSMUSG00000039195 | 1110008P14Rik | 0.427236952  | 0.000345304 | 0.010969349 |
| ENSMUSG00000049517 | Rps23         | 0.336931773  | 0.00034968  | 0.011080023 |
| ENSMUSG00000038967 | Pdk2          | -0.999351535 | 0.000352058 | 0.011116584 |
| ENSMUSG00000063021 | Hist1h2ak     | 0.709935803  | 0.000352623 | 0.011116584 |
| ENSMUSG00000019872 | Smpdl3a       | -0.476171349 | 0.000354101 | 0.011130654 |
| ENSMUSG00000021665 | Hexb          | -0.383732924 | 0.000363147 | 0.011130654 |
| ENSMUSG00000022529 | Zfp263        | -0.585573296 | 0.000363691 | 0.011130654 |
| ENSMUSG00000029199 | Lias          | 0.439324238  | 0.000358264 | 0.011130654 |
| ENSMUSG00000030330 | Ing4          | -0.317103254 | 0.000363823 | 0.011130654 |
| ENSMUSG00000031818 | Cox4i1        | 0.321417804  | 0.000362064 | 0.011130654 |
| ENSMUSG00000038346 | Zfp384        | -0.517421484 | 0.000361435 | 0.011130654 |
| ENSMUSG00000039735 | Fnbp1l        | -0.761974952 | 0.000359179 | 0.011130654 |
| ENSMUSG00000042684 | Npl           | 0.342397522  | 0.000363388 | 0.011130654 |
| ENSMUSG00000063316 | Rpl27         | 0.444157766  | 0.000361669 | 0.011130654 |
| ENSMUSG00000099875 | Rbm3-ps       | 3.376502763  | 0.000361301 | 0.011130654 |
| ENSMUSG00000114137 | Gm48685       | 0.893972354  | 0.000361654 | 0.011130654 |
| ENSMUSG00000024589 | Nedd4l        | -0.512017654 | 0.00036504  | 0.011140368 |
| ENSMUSG00000032301 | Psm4          | 0.318688007  | 0.000365934 | 0.011140368 |
| ENSMUSG00000075592 | Nynrin        | -1.107715826 | 0.000367561 | 0.011162538 |
| ENSMUSG00000029385 | Ccng2         | -0.651620336 | 0.000368489 | 0.011163428 |
| ENSMUSG00000034245 | Hdac11        | -0.051043794 | 0.000375859 | 0.011358993 |
| ENSMUSG00000039577 | Nphp4         | -1.503146334 | 0.000379744 | 0.011432685 |
| ENSMUSG00000071415 | Rpl23         | 0.391371074  | 0.000380138 | 0.011432685 |
| ENSMUSG00000040472 | Rabggta       | -0.35613089  | 0.000381336 | 0.011441006 |
| ENSMUSG00000003429 | Rps11         | 0.453885063  | 0.00038504  | 0.011515773 |
| ENSMUSG00000019528 | Gyg           | 0.546189594  | 0.00038661  | 0.011515773 |
| ENSMUSG00000042129 | Rassf4        | -0.370053487 | 0.000386247 | 0.011515773 |
| ENSMUSG00000036751 | Cox6b1        | 0.286088367  | 0.000388074 | 0.011531732 |
| ENSMUSG00000004568 | Arhgef18      | -0.734492036 | 0.000390418 | 0.01157371  |
| ENSMUSG00000028081 | Rps3a1        | 0.403423507  | 0.00039766  | 0.011752391 |
| ENSMUSG00000034024 | Cct2          | 0.504063289  | 0.000398338 | 0.011752391 |
| ENSMUSG00000005871 | Apc           | 0.70591643   | 0.000400111 | 0.011776716 |
| ENSMUSG00000082768 | Gm12727       | 1.640770093  | 0.000409105 | 0.012012994 |
| ENSMUSG00000036528 | Ppfibp2       | -0.67086906  | 0.000413837 | 0.012123287 |
| ENSMUSG00000041453 | Rpl21         | 0.341334766  | 0.000425371 | 0.01243184  |
| ENSMUSG00000068917 | Clk2          | -0.482418879 | 0.000427589 | 0.012467325 |
| ENSMUSG00000028837 | Psmb2         | 0.311985599  | 0.000429993 | 0.012483788 |
| ENSMUSG00000067847 | Romo1         | 0.321565946  | 0.000430164 | 0.012483788 |
| ENSMUSG00000022336 | Eif3e         | 0.399883271  | 0.000434262 | 0.012515002 |

|                    |          |              |             |             |
|--------------------|----------|--------------|-------------|-------------|
| ENSMUSG00000040687 | Madd     | -0.480476448 | 0.000434089 | 0.012515002 |
| ENSMUSG00000060036 | Rpl3     | 0.399253873  | 0.000433779 | 0.012515002 |
| ENSMUSG00000049625 | Tifab    | -0.553690853 | 0.000439265 | 0.012629898 |
| ENSMUSG00000068749 | Psma5    | 0.347752525  | 0.000441146 | 0.012654662 |
| ENSMUSG00000043065 | Spice1   | -0.646748003 | 0.000448407 | 0.01283333  |
| ENSMUSG00000034453 | Polr3b   | 0.687795506  | 0.000464718 | 0.013269572 |
| ENSMUSG00000024913 | Lrp5     | -0.845325696 | 0.000467196 | 0.013309722 |
| ENSMUSG00000023068 | Nus1     | 0.379854503  | 0.00047528  | 0.013501713 |
| ENSMUSG00000030747 | Dgat2    | 0.888559911  | 0.000477129 | 0.013501713 |
| ENSMUSG00000037649 | H2-DMa   | -0.463778766 | 0.000477196 | 0.013501713 |
| ENSMUSG00000090137 | Uba52    | 0.285420919  | 0.000481087 | 0.013580874 |
| ENSMUSG00000013089 | Etv5     | 1.484799589  | 0.000485204 | 0.013637334 |
| ENSMUSG00000026893 | Gca      | 0.598926787  | 0.000485283 | 0.013637334 |
| ENSMUSG00000015672 | Mrpl32   | 0.311497553  | 0.000493965 | 0.013849969 |
| ENSMUSG00000053565 | Eif3k    | 0.416154151  | 0.000496412 | 0.013887235 |
| ENSMUSG00000028431 | Elp1     | 0.759985897  | 0.000498815 | 0.013891884 |
| ENSMUSG00000081344 | Gm14303  | 0.273827232  | 0.000497958 | 0.013891884 |
| ENSMUSG00000010051 | Hyal1    | -0.65671531  | 0.000502482 | 0.01393154  |
| ENSMUSG00000057191 | AB124611 | 0.405020188  | 0.000502218 | 0.01393154  |
| ENSMUSG00000021018 | Polr2h   | 0.351713517  | 0.000506331 | 0.014004488 |
| ENSMUSG00000035505 | Cox18    | 0.384908024  | 0.000508394 | 0.014004488 |
| ENSMUSG00000095597 | Gm6472   | 0.398249476  | 0.000508496 | 0.014004488 |
| ENSMUSG00000009995 | Taz      | -0.422250613 | 0.000514835 | 0.014147705 |
| ENSMUSG00000030851 | Ldhc     | -0.886925653 | 0.000517357 | 0.014178797 |
| ENSMUSG00000048007 | Timm8a1  | 0.41609902   | 0.000518249 | 0.014178797 |
| ENSMUSG00000030788 | Rnf141   | 0.560498229  | 0.000531566 | 0.014511179 |
| ENSMUSG00000090862 | Rps13    | 0.500242515  | 0.000536702 | 0.014619248 |
| ENSMUSG00000022193 | Psmb5    | 0.45750738   | 0.000543987 | 0.01478525  |
| ENSMUSG00000011158 | Brf1     | -0.483047827 | 0.000545624 | 0.014797359 |
| ENSMUSG00000026113 | Inpp4a   | -0.744014985 | 0.000550257 | 0.014890503 |
| ENSMUSG00000071644 | Eef1g    | 0.494383736  | 0.000557859 | 0.015063406 |
| ENSMUSG00000022671 | Mzt2     | 0.405105864  | 0.000562231 | 0.015148539 |
| ENSMUSG00000018924 | Alox15   | -0.170744022 | 0.000563596 | 0.015152424 |
| ENSMUSG00000025239 | Limd1    | -0.717705888 | 0.000568693 | 0.015256444 |
| ENSMUSG00000021147 | Wdr37    | -0.711381346 | 0.000576685 | 0.015371253 |
| ENSMUSG00000027076 | Timm10   | 0.327939841  | 0.000575343 | 0.015371253 |
| ENSMUSG00000036931 | Nfkbid   | -0.548203597 | 0.000576661 | 0.015371253 |
| ENSMUSG00000020857 | Nme2     | 0.379360707  | 0.000578891 | 0.015397001 |
| ENSMUSG00000095588 | Gm12350  | 0.31614049   | 0.000581454 | 0.015432125 |
| ENSMUSG00000028522 | Mier1    | 0.533399517  | 0.000593528 | 0.015599109 |
| ENSMUSG00000047260 | Emc6     | 0.348999101  | 0.00059107  | 0.015599109 |
| ENSMUSG00000059479 | B3gnt8   | -0.585491102 | 0.000591052 | 0.015599109 |
| ENSMUSG00000060601 | Nr1h2    | -0.605539156 | 0.000591659 | 0.015599109 |

|                    |               |              |             |             |
|--------------------|---------------|--------------|-------------|-------------|
| ENSMUSG00000081926 | Gm15536       | 0.446024743  | 0.000594025 | 0.015599109 |
| ENSMUSG00000036764 | Dnajc12       | 0.345587071  | 0.000601404 | 0.015726392 |
| ENSMUSG00000078941 | Ak6           | 0.355636093  | 0.000601165 | 0.015726392 |
| ENSMUSG00000002477 | Snrpd1        | 0.362344068  | 0.000614473 | 0.016000776 |
| ENSMUSG00000058546 | Rpl23a        | 0.346779841  | 0.000613588 | 0.016000776 |
| ENSMUSG00000053398 | Phgdh         | 0.303501698  | 0.000615837 | 0.016002737 |
| ENSMUSG00000023861 | Mpc1          | 0.364938251  | 0.000617215 | 0.016005061 |
| ENSMUSG00000083061 | Gm12191       | 0.464659843  | 0.000624464 | 0.016159308 |
| ENSMUSG00000010110 | Stx5a         | -0.389026682 | 0.00062607  | 0.016167176 |
| ENSMUSG00000026234 | Ncl           | 0.669972811  | 0.000630039 | 0.016235924 |
| ENSMUSG00000024997 | Prdx3         | 0.401365931  | 0.000634575 | 0.016318946 |
| ENSMUSG00000084349 | Rpl3-ps1      | 0.414551663  | 0.000635894 | 0.016319081 |
| ENSMUSG00000001865 | Cpa3          | -0.722049983 | 0.000637428 | 0.016324739 |
| ENSMUSG00000003308 | Keap1         | -0.411148283 | 0.000641232 | 0.016354707 |
| ENSMUSG00000076437 | Selenoh       | 0.281020312  | 0.000640807 | 0.016354707 |
| ENSMUSG00000003955 | Fam162a       | 0.326818178  | 0.000659236 | 0.016779439 |
| ENSMUSG00000034317 | Trim59        | -0.448387225 | 0.000662799 | 0.016835627 |
| ENSMUSG00000001065 | Zfp276        | -0.625413129 | 0.000681413 | 0.017073353 |
| ENSMUSG00000023456 | Tpi1          | 0.390300944  | 0.000676314 | 0.017073353 |
| ENSMUSG00000027108 | Ola1          | 0.447101013  | 0.00068178  | 0.017073353 |
| ENSMUSG00000030744 | Rps3          | 0.31323461   | 0.000679771 | 0.017073353 |
| ENSMUSG00000041857 | Oosp1         | 0.870627143  | 0.000680759 | 0.017073353 |
| ENSMUSG00000047126 | Cltc          | 0.831252197  | 0.000674792 | 0.017073353 |
| ENSMUSG00000076617 | Ighm          | -0.600144164 | 0.000679083 | 0.017073353 |
| ENSMUSG00000019301 | Hsd17b1       | 0.475592479  | 0.000694713 | 0.017362228 |
| ENSMUSG00000036478 | Btg1          | -0.51184229  | 0.000698678 | 0.017426255 |
| ENSMUSG00000107176 | Gm9794        | 0.34213352   | 0.000702426 | 0.017484635 |
| ENSMUSG00000063193 | Cd300lb       | -0.949534075 | 0.000705863 | 0.017535057 |
| ENSMUSG00000051344 | Plekhm3       | -0.931165681 | 0.000708895 | 0.017575209 |
| ENSMUSG00000011179 | Odc1          | 0.434941425  | 0.000715949 | 0.017714751 |
| ENSMUSG00000114797 | Gm49336       | -0.425187119 | 0.000725513 | 0.017915693 |
| ENSMUSG00000036002 | Fam214b       | -1.046518581 | 0.000730539 | 0.017968378 |
| ENSMUSG00000059775 | Rps26-ps1     | 0.310987355  | 0.000729739 | 0.017968378 |
| ENSMUSG00000006715 | Gmnn          | 0.282377668  | 0.000739236 | 0.018146351 |
| ENSMUSG00000043740 | B430306N03Rik | -0.647421273 | 0.000746159 | 0.018280148 |
| ENSMUSG00000001120 | Pcbp3         | -0.812162951 | 0.000758812 | 0.018342332 |
| ENSMUSG00000001552 | Jup           | -1.172286946 | 0.000759034 | 0.018342332 |
| ENSMUSG00000026784 | Pdss1         | 0.383541708  | 0.000754656 | 0.018342332 |
| ENSMUSG00000028960 | Ube4b         | 0.784487258  | 0.000753948 | 0.018342332 |
| ENSMUSG00000036646 | Man1b1        | -0.538103733 | 0.000756302 | 0.018342332 |
| ENSMUSG00000094447 | 9430069I07Rik | 0.507223007  | 0.000752143 | 0.018342332 |
| ENSMUSG00000112247 | Gm47894       | 1.700653736  | 0.000758048 | 0.018342332 |
| ENSMUSG00000057982 | Zfp809        | -0.554256064 | 0.0007607   | 0.018346897 |

|                    |               |              |             |             |
|--------------------|---------------|--------------|-------------|-------------|
| ENSMUSG00000051355 | Commd1        | 0.391826374  | 0.000765844 | 0.018435175 |
| ENSMUSG00000081228 | Gm16089       | 0.404056914  | 0.000768149 | 0.018454889 |
| ENSMUSG00000091183 | Gm5141        | -1.038381144 | 0.000789643 | 0.018934659 |
| ENSMUSG00000028792 | Ak2           | 0.375054931  | 0.000793683 | 0.018958342 |
| ENSMUSG00000035953 | Pip4p1        | -0.500811688 | 0.000793388 | 0.018958342 |
| ENSMUSG00000061787 | Rps17         | 0.457853565  | 0.000796242 | 0.018982968 |
| ENSMUSG00000025480 | Syce1         | -0.076144478 | 0.000801286 | 0.019066616 |
| ENSMUSG00000081967 | Gm14017       | 0.372369433  | 0.000810796 | 0.019246711 |
| ENSMUSG00000112567 | Gm32899       | 0.470981172  | 0.000811954 | 0.019246711 |
| ENSMUSG00000020089 | Ppa1          | 0.471078408  | 0.000814782 | 0.019276959 |
| ENSMUSG00000024359 | Hspa9         | 0.370749901  | 0.00082338  | 0.019406457 |
| ENSMUSG00000029153 | Ociad2        | 0.695261882  | 0.000822666 | 0.019406457 |
| ENSMUSG00000000538 | Tom1l2        | -0.739493188 | 0.000829509 | 0.019491919 |
| ENSMUSG00000034659 | Tmem109       | -0.862987882 | 0.000830145 | 0.019491919 |
| ENSMUSG00000028952 | Zbtb48        | -0.593999236 | 0.000837853 | 0.019619974 |
| ENSMUSG00000102824 | Pdcd5-ps      | 0.322848081  | 0.000838757 | 0.019619974 |
| ENSMUSG00000019738 | Polr2i        | 0.295471255  | 0.000844005 | 0.019654617 |
| ENSMUSG00000025316 | Banp          | -0.672472541 | 0.000842519 | 0.019654617 |
| ENSMUSG00000029461 | Fam168a       | -0.744931436 | 0.000844986 | 0.019654617 |
| ENSMUSG00000029060 | Mib2          | -0.753353704 | 0.000851524 | 0.019769677 |
| ENSMUSG00000026519 | Tmem63a       | -0.569068943 | 0.000860549 | 0.019941931 |
| ENSMUSG00000033594 | Spata2l       | -0.663559598 | 0.00086337  | 0.019970064 |
| ENSMUSG00000009035 | Tmem184b      | -0.72386483  | 0.000882126 | 0.020093705 |
| ENSMUSG00000015291 | Gdi1          | -0.534277371 | 0.000879322 | 0.020093705 |
| ENSMUSG00000017404 | Rpl19         | 0.311624432  | 0.000877631 | 0.020093705 |
| ENSMUSG00000018381 | Abi3          | 0.940088295  | 0.000883275 | 0.020093705 |
| ENSMUSG00000019944 | Rhobtb1       | -0.772325824 | 0.000875235 | 0.020093705 |
| ENSMUSG00000028678 | Kif2c         | -0.297404333 | 0.000872935 | 0.020093705 |
| ENSMUSG00000035697 | Arhgap45      | -0.406773499 | 0.00087096  | 0.020093705 |
| ENSMUSG00000057990 | E030024N20Rik | 0.957412537  | 0.000881273 | 0.020093705 |
| ENSMUSG00000073422 | H2-Ke6        | -0.296719501 | 0.00087408  | 0.020093705 |
| ENSMUSG00000015749 | Anp32e        | 0.316294768  | 0.000885266 | 0.020102174 |
| ENSMUSG00000009090 | Ap1b1         | -0.514294508 | 0.000899472 | 0.020387476 |
| ENSMUSG00000022043 | Trim35        | -0.566320041 | 0.000902984 | 0.020429811 |
| ENSMUSG00000025875 | Tspan17       | -0.709537787 | 0.000919664 | 0.020694105 |
| ENSMUSG00000038690 | Atp5j2        | 0.301418323  | 0.000917203 | 0.020694105 |
| ENSMUSG00000038722 | Bud31         | 0.276310086  | 0.000919582 | 0.020694105 |
| ENSMUSG00000056130 | Ticam2        | -0.469628158 | 0.000925709 | 0.020792459 |
| ENSMUSG00000036469 | March1        | -1.231033246 | 0.00092841  | 0.020815497 |
| ENSMUSG00000005161 | Prdx2         | 0.26419493   | 0.000936797 | 0.020927984 |
| ENSMUSG00000024683 | Mrpl16        | 0.323523311  | 0.000936741 | 0.020927984 |
| ENSMUSG00000045826 | Ptprcap       | 0.469122558  | 0.0009433   | 0.021035419 |
| ENSMUSG00000026435 | Slc45a3       | -1.038654425 | 0.000947104 | 0.021044674 |

|                    |           |              |             |             |
|--------------------|-----------|--------------|-------------|-------------|
| ENSMUSG00000034379 | Wdr5b     | -0.520259426 | 0.000946882 | 0.021044674 |
| ENSMUSG00000030469 | Zfp719    | -0.836143199 | 0.000961536 | 0.021251325 |
| ENSMUSG00000035351 | Nup37     | 0.36300795   | 0.000958269 | 0.021251325 |
| ENSMUSG00000040269 | Mrps28    | 0.388693094  | 0.000960107 | 0.021251325 |
| ENSMUSG00000030879 | Mrpl17    | 0.319913091  | 0.000967986 | 0.021355873 |
| ENSMUSG00000021670 | Hmgcr     | -0.555260472 | 0.0009732   | 0.021424545 |
| ENSMUSG00000047867 | Gimap6    | -1.20522577  | 0.000974549 | 0.021424545 |
| ENSMUSG00000051367 | Six1      | 2.165394151  | 0.00097755  | 0.021452554 |
| ENSMUSG00000096726 | Gm5558    | 0.876700241  | 0.000981985 | 0.021511877 |
| ENSMUSG00000024013 | Fgd2      | -0.591053882 | 0.000986756 | 0.021544528 |
| ENSMUSG00000048970 | C1galt1c1 | -0.453940273 | 0.000986944 | 0.021544528 |
| ENSMUSG00000041890 | Git2      | -0.522466084 | 0.000994951 | 0.021681215 |
| ENSMUSG00000055041 | Commd5    | 0.415156865  | 0.000999581 | 0.021743956 |
| ENSMUSG00000041697 | Cox6a1    | 0.267292031  | 0.001003616 | 0.021793549 |
| ENSMUSG00000072082 | Ccnf      | -0.528891929 | 0.001022849 | 0.022172445 |
| ENSMUSG00000033364 | Usp37     | 0.686704475  | 0.001029042 | 0.022201359 |
| ENSMUSG00000050147 | F2rl3     | 0.609654371  | 0.001029255 | 0.022201359 |
| ENSMUSG00000100863 | Gm12669   | 0.379922083  | 0.001029545 | 0.022201359 |
| ENSMUSG00000018651 | Tada2a    | -0.438568127 | 0.001032182 | 0.022219648 |
| ENSMUSG00000068396 | Rpl34-ps1 | 0.360796379  | 0.00103485  | 0.022238534 |
| ENSMUSG00000083621 | Gm14586   | 0.471382943  | 0.001044003 | 0.022396486 |
| ENSMUSG00000033931 | Rbm34     | 0.423375548  | 0.001046099 | 0.022402759 |
| ENSMUSG00000060429 | Sntb1     | -0.714334319 | 0.001057296 | 0.022603575 |
| ENSMUSG00000038909 | Kat7      | -0.46996081  | 0.001059815 | 0.022618482 |
| ENSMUSG00000025190 | Got1      | 0.468213587  | 0.001066866 | 0.022713106 |
| ENSMUSG00000110275 | Gm5905    | 0.816871133  | 0.001067905 | 0.022713106 |
| ENSMUSG00000062070 | Pgk1      | 0.352883429  | 0.001071175 | 0.022743699 |
| ENSMUSG00000032002 | Dcun1d5   | 0.276286028  | 0.001073779 | 0.022759565 |
| ENSMUSG00000034892 | Rps29     | 0.265469753  | 0.001075587 | 0.022759565 |
| ENSMUSG00000047676 | Rpsa-ps10 | 0.420893189  | 0.00108454  | 0.022909982 |
| ENSMUSG00000060938 | Rpl26     | 0.329320587  | 0.001101469 | 0.023228093 |
| ENSMUSG00000000730 | Dnmt3l    | 0.93932476   | 0.001104229 | 0.023246828 |
| ENSMUSG00000000171 | Sdhd      | 0.271647649  | 0.001108068 | 0.02324883  |
| ENSMUSG00000082286 | Pisd-ps1  | -0.672688968 | 0.001106635 | 0.02324883  |
| ENSMUSG00000019854 | Reps1     | -0.471431996 | 0.001126936 | 0.023604842 |
| ENSMUSG00000031388 | Naa10     | 0.335439251  | 0.001132082 | 0.023672711 |
| ENSMUSG00000021930 | Spryd7    | 0.698551495  | 0.001134385 | 0.023681011 |
| ENSMUSG00000004610 | Etfb      | 0.345281034  | 0.001139184 | 0.023741276 |
| ENSMUSG00000030291 | Med21     | 0.424185609  | 0.001160754 | 0.024150301 |
| ENSMUSG00000059291 | Rpl11     | 0.337213582  | 0.001165154 | 0.024160903 |
| ENSMUSG00000062661 | Ncs1      | -0.949184686 | 0.00116371  | 0.024160903 |
| ENSMUSG00000073940 | Hbb-bt    | -0.133732148 | 0.00117151  | 0.024252207 |
| ENSMUSG00000053510 | Nrd1      | 0.534391988  | 0.001181327 | 0.024414752 |

|                    |            |              |             |             |
|--------------------|------------|--------------|-------------|-------------|
| ENSMUSG00000028383 | Hsd12      | 0.358838664  | 0.001194135 | 0.024638458 |
| ENSMUSG00000001034 | Mapk7      | -0.659562951 | 0.001196605 | 0.024648481 |
| ENSMUSG00000027170 | Eif3m      | 0.362629934  | 0.001200044 | 0.024678383 |
| ENSMUSG00000034875 | Nudt19     | 0.312135626  | 0.00120209  | 0.02467961  |
| ENSMUSG00000066152 | Slc31a2    | -0.383776821 | 0.001205186 | 0.024702334 |
| ENSMUSG00000027203 | Dut        | 0.375164     | 0.001214292 | 0.024766378 |
| ENSMUSG00000028741 | Mrto4      | 0.374374555  | 0.001213183 | 0.024766378 |
| ENSMUSG00000032892 | Rangrf     | 0.403929232  | 0.001212051 | 0.024766378 |
| ENSMUSG00000027878 | Notch2     | -0.666626917 | 0.00122142  | 0.024870317 |
| ENSMUSG00000071379 | Hpcal1     | -0.293955233 | 0.001223393 | 0.024870317 |
| ENSMUSG00000022701 | Ccdc191    | -0.420637902 | 0.001237196 | 0.025068863 |
| ENSMUSG00000095041 | AC149090.1 | -0.493482778 | 0.001236359 | 0.025068863 |
| ENSMUSG00000002797 | Ggct       | 0.451123222  | 0.001243425 | 0.025113139 |
| ENSMUSG00000021520 | Uqcrb      | 0.29829486   | 0.001242781 | 0.025113139 |
| ENSMUSG00000020107 | Anapc16    | 0.324527649  | 0.00124993  | 0.025203542 |
| ENSMUSG00000084013 | Gm14270    | 0.616885033  | 0.001253454 | 0.02523364  |
| ENSMUSG00000115338 | Pnp        | 0.318656791  | 0.001262061 | 0.025365796 |
| ENSMUSG00000043716 | Rpl7       | 0.487270549  | 0.001289792 | 0.025881278 |
| ENSMUSG00000034105 | Tlhc1      | -0.551460681 | 0.001294861 | 0.025941069 |
| ENSMUSG00000034401 | Spata6     | -0.611666089 | 0.001317455 | 0.026351213 |
| ENSMUSG00000075229 | Ccdc58     | 0.442729834  | 0.001337257 | 0.026704285 |
| ENSMUSG00000061028 | Clasrp     | -0.459137645 | 0.00135248  | 0.026921727 |
| ENSMUSG00000082908 | Gm13736    | 0.293173638  | 0.001351145 | 0.026921727 |
| ENSMUSG00000028455 | Stoml2     | 0.294757132  | 0.001364327 | 0.027114084 |
| ENSMUSG00000030269 | Mtmr14     | -0.499449379 | 0.001377197 | 0.02732615  |
| ENSMUSG00000029338 | Antxr2     | -0.628030766 | 0.001380499 | 0.027347963 |
| ENSMUSG00000066809 | Gm10180    | 1.338144226  | 0.001392916 | 0.027550007 |
| ENSMUSG00000029127 | Zbtb49     | -0.703854171 | 0.001395774 | 0.027562645 |
| ENSMUSG00000031389 | Arhgap4    | -0.418923987 | 0.001407788 | 0.027755777 |
| ENSMUSG0000004665  | Cnn2       | -0.363261089 | 0.00142042  | 0.027928874 |
| ENSMUSG00000050555 | Hyls1      | -0.568577644 | 0.001421065 | 0.027928874 |
| ENSMUSG00000044573 | Acp1       | 0.319636748  | 0.00142586  | 0.027978849 |
| ENSMUSG00000028458 | Tesk1      | -0.862315516 | 0.001431568 | 0.028046533 |
| ENSMUSG00000079316 | Rab9       | 0.315969176  | 0.001436541 | 0.028099646 |
| ENSMUSG00000032803 | Cdv3       | 0.717982777  | 0.001441833 | 0.028114608 |
| ENSMUSG00000053768 | Chchd3     | 0.316246362  | 0.001441565 | 0.028114608 |
| ENSMUSG00000031129 | Slc9a9     | -0.680973779 | 0.001448363 | 0.028197673 |
| ENSMUSG00000026835 | Fcnb       | -0.505783938 | 0.001470031 | 0.028574734 |
| ENSMUSG00000063830 | Gm6065     | 0.820268576  | 0.001480206 | 0.028727561 |
| ENSMUSG00000000088 | Cox5a      | 0.303938663  | 0.001488749 | 0.028792792 |
| ENSMUSG00000025967 | Eef1b2     | 0.34038659   | 0.001492839 | 0.028792792 |
| ENSMUSG00000037523 | Mavs       | -0.473510305 | 0.001487923 | 0.028792792 |
| ENSMUSG00000038170 | Pde4dip    | -0.660865054 | 0.001491506 | 0.028792792 |

|                    |          |              |             |             |
|--------------------|----------|--------------|-------------|-------------|
| ENSMUSG00000029068 | Ccnl2    | -0.391537989 | 0.001508745 | 0.029054451 |
| ENSMUSG00000018927 | Ccl6     | -0.423855248 | 0.001521093 | 0.029246897 |
| ENSMUSG00000051506 | Wdfy4    | 0.680819005  | 0.001529289 | 0.029359039 |
| ENSMUSG00000024608 | Rps14    | 0.302596588  | 0.001531996 | 0.029365628 |
| ENSMUSG00000001415 | Smg5     | -0.411018815 | 0.001556529 | 0.029789895 |
| ENSMUSG00000021418 | Rpp40    | 0.432453755  | 0.001563357 | 0.02987455  |
| ENSMUSG00000019261 | Map1s    | -0.659745574 | 0.001569336 | 0.029899493 |
| ENSMUSG00000029534 | St7      | 0.394813457  | 0.001569477 | 0.029899493 |
| ENSMUSG00000049744 | Arhgap15 | -0.277718282 | 0.00157398  | 0.029939365 |
| ENSMUSG00000037731 | Themis2  | -0.637731712 | 0.001579786 | 0.030003865 |
| ENSMUSG00000043572 | Pars2    | -0.472083042 | 0.001586852 | 0.030092036 |
| ENSMUSG00000043263 | Ifi209   | -0.579292458 | 0.00159329  | 0.030147062 |
| ENSMUSG00000044349 | Snhg11   | -0.546380694 | 0.001594607 | 0.030147062 |
| ENSMUSG00000042043 | Tbca     | 0.410568813  | 0.001603816 | 0.030275078 |
| ENSMUSG00000021481 | Zfp346   | -0.603017028 | 0.001628575 | 0.030649296 |
| ENSMUSG00000072949 | Acot1    | 0.800959646  | 0.001626283 | 0.030649296 |
| ENSMUSG00000015932 | Dstn     | 0.370650708  | 0.001640694 | 0.030748193 |
| ENSMUSG00000040463 | Mybbp1a  | 0.440375656  | 0.001643732 | 0.030748193 |
| ENSMUSG00000041638 | Gcn11l   | -0.462303761 | 0.001637518 | 0.030748193 |
| ENSMUSG00000085787 | Gm13092  | 0.32492357   | 0.001641383 | 0.030748193 |
| ENSMUSG00000037531 | Mrpl47   | 0.347752651  | 0.001655161 | 0.030915424 |
| ENSMUSG00000081974 | Gm11960  | 0.985943853  | 0.001661288 | 0.030983262 |
| ENSMUSG00000025491 | Ifitm1   | 0.632389894  | 0.001674651 | 0.031158542 |
| ENSMUSG00000048351 | Coa7     | 0.364502985  | 0.001675703 | 0.031158542 |
| ENSMUSG00000050323 | Ndufaf6  | 0.319397828  | 0.001687942 | 0.031292435 |
| ENSMUSG00000074129 | Rpl13a   | 0.292898961  | 0.001687427 | 0.031292435 |
| ENSMUSG00000000386 | Mx1      | -0.181595171 | 0.00171145  | 0.031658387 |
| ENSMUSG00000021391 | Cenpp    | 0.320241462  | 0.00171278  | 0.031658387 |
| ENSMUSG00000025492 | Ifitm3   | 0.475258741  | 0.001726491 | 0.031864411 |
| ENSMUSG00000040016 | Ptger3   | 0.812798694  | 0.001742379 | 0.032109931 |
| ENSMUSG00000106037 | Gm4332   | 0.385896166  | 0.001755008 | 0.032294742 |
| ENSMUSG00000029014 | Dnajc2   | 0.397648216  | 0.001772101 | 0.032561048 |
| ENSMUSG00000028610 | Dmrtb1   | -1.232358975 | 0.001775516 | 0.032575596 |
| ENSMUSG00000027330 | Cdc25b   | -0.748209678 | 0.001779932 | 0.032608465 |
| ENSMUSG00000023977 | Ubr2     | 0.602458285  | 0.001804966 | 0.032850311 |
| ENSMUSG00000061518 | Cox5b    | 0.261407827  | 0.001806357 | 0.032850311 |
| ENSMUSG00000081600 | Gm12286  | 1.086761088  | 0.001795801 | 0.032850311 |
| ENSMUSG00000083044 | Gm12416  | 1.366683949  | 0.001803007 | 0.032850311 |
| ENSMUSG00000096768 | Gm47283  | 0.8332939    | 0.001805719 | 0.032850311 |
| ENSMUSG00000041354 | Rgl2     | -0.674128648 | 0.001826105 | 0.033160894 |
| ENSMUSG00000028010 | Gar1     | 0.257959967  | 0.001828912 | 0.033163377 |
| ENSMUSG00000030657 | Xylt1    | -0.672373379 | 0.001839545 | 0.033270167 |
| ENSMUSG00000037966 | Ninj1    | -0.2910967   | 0.001840158 | 0.033270167 |

|                    |            |              |             |             |
|--------------------|------------|--------------|-------------|-------------|
| ENSMUSG00000083496 | Gm11263    | 1.520635066  | 0.001864118 | 0.03365437  |
| ENSMUSG00000040407 | Akap9      | -0.381170967 | 0.001881513 | 0.033919115 |
| ENSMUSG00000060739 | Nsa2       | 0.304172387  | 0.001887268 | 0.033973564 |
| ENSMUSG00000035960 | Apex1      | 0.261049069  | 0.00190198  | 0.034188851 |
| ENSMUSG00000064246 | Chil1      | -0.972506882 | 0.001916187 | 0.034394441 |
| ENSMUSG00000117621 | AC117239.2 | 0.42870592   | 0.001935523 | 0.034691381 |
| ENSMUSG00000036928 | Stag3      | -1.208417839 | 0.001944919 | 0.03475948  |
| ENSMUSG00000078903 | Gm14391    | 1.573225056  | 0.001943863 | 0.03475948  |
| ENSMUSG00000032812 | Arap1      | -0.607709812 | 0.001957839 | 0.034940118 |
| ENSMUSG00000025968 | Ndufs1     | 0.337567395  | 0.001977061 | 0.035232538 |
| ENSMUSG00000004268 | Emg1       | 0.331541832  | 0.001986405 | 0.035310296 |
| ENSMUSG00000043467 | Zbtb37     | 1.19721997   | 0.00198711  | 0.035310296 |
| ENSMUSG00000032423 | Syncrip    | 0.42120919   | 0.001990365 | 0.035317608 |
| ENSMUSG00000089665 | Fcor       | 0.451688531  | 0.002009696 | 0.03560975  |
| ENSMUSG00000083291 | Gm13679    | 1.224335152  | 0.00201851  | 0.03571498  |
| ENSMUSG00000073676 | Hspe1      | 0.419775249  | 0.002025138 | 0.035781274 |
| ENSMUSG00000061104 | Sap18b     | 0.271124177  | 0.002041329 | 0.036016125 |
| ENSMUSG00000034853 | Acot11     | -0.136621987 | 0.00204644  | 0.03605508  |
| ENSMUSG00000033020 | Polr2f     | 0.29941274   | 0.002049944 | 0.036065657 |
| ENSMUSG00000058135 | Gstm1      | 0.29867958   | 0.002052931 | 0.036067116 |
| ENSMUSG00000011008 | Mcoln2     | 1.797048103  | 0.002058611 | 0.036115823 |
| ENSMUSG00000055413 | H2-Q5      | -0.924644499 | 0.002066271 | 0.036199078 |
| ENSMUSG00000091498 | Mpc1-ps    | 0.353447844  | 0.002071686 | 0.036242842 |
| ENSMUSG00000023952 | Gtpbp2     | -0.511943683 | 0.00208725  | 0.036372118 |
| ENSMUSG00000041515 | Irf8       | -0.57913987  | 0.002087861 | 0.036372118 |
| ENSMUSG00000073987 | Ggh        | -0.370690305 | 0.002085914 | 0.036372118 |
| ENSMUSG00000024560 | Cxxc1      | -0.4061497   | 0.002093546 | 0.036420069 |
| ENSMUSG00000024960 | Plcb3      | -0.518173163 | 0.002101374 | 0.03650513  |
| ENSMUSG00000070972 | Dnajc25    | 0.330090619  | 0.002115621 | 0.036701296 |
| ENSMUSG00000026073 | Ii1r2      | 0.902424605  | 0.002123183 | 0.036781118 |
| ENSMUSG00000042817 | Flt3       | 0.91847247   | 0.00212752  | 0.03680491  |
| ENSMUSG00000022174 | Dad1       | 0.230770621  | 0.00217449  | 0.037565145 |
| ENSMUSG00000022370 | Mrpl13     | 0.287148295  | 0.002185442 | 0.037701909 |
| ENSMUSG00000047215 | Rpl9       | 0.32948737   | 0.002194579 | 0.037807028 |
| ENSMUSG00000001128 | Cfp        | -0.462635574 | 0.002211888 | 0.037947322 |
| ENSMUSG00000011960 | Ccnt1      | -0.317357861 | 0.002209173 | 0.037947322 |
| ENSMUSG00000049932 | H2afx      | -0.312876148 | 0.002209573 | 0.037947322 |
| ENSMUSG00000025507 | Pidd1      | -0.633630593 | 0.002220102 | 0.037983308 |
| ENSMUSG00000030335 | Mrpl51     | 0.332927805  | 0.002219602 | 0.037983308 |
| ENSMUSG00000031461 | Myom2      | -0.646965191 | 0.002225952 | 0.038000611 |
| ENSMUSG00000083429 | Gm15198    | 0.331434717  | 0.002227232 | 0.038000611 |
| ENSMUSG00000000440 | Pparg      | -0.160689035 | 0.002235777 | 0.03809409  |
| ENSMUSG00000052336 | Cx3cr1     | -0.659016816 | 0.002243415 | 0.038171867 |

|                    |               |              |             |             |
|--------------------|---------------|--------------|-------------|-------------|
| ENSMUSG00000081824 | BC002163      | 0.297792146  | 0.002257868 | 0.038365219 |
| ENSMUSG00000029860 | Zyx           | -0.510287133 | 0.002269404 | 0.038505326 |
| ENSMUSG00000067274 | Rplp0         | 0.288717698  | 0.002272313 | 0.038505326 |
| ENSMUSG00000007379 | Dennd2c       | -1.173931354 | 0.002276182 | 0.038518333 |
| ENSMUSG00000036644 | Tbc1d9b       | -0.596845511 | 0.002281577 | 0.038557096 |
| ENSMUSG00000024118 | Tedc2         | -0.444763689 | 0.002291373 | 0.038617566 |
| ENSMUSG00000090877 | Hspa1b        | -0.212085171 | 0.002289619 | 0.038617566 |
| ENSMUSG00000027374 | Mrps5         | 0.442197138  | 0.002296958 | 0.038659237 |
| ENSMUSG00000096755 | Ftl1-ps2      | 0.579686768  | 0.002313918 | 0.038891987 |
| ENSMUSG00000027777 | Schip1        | 0.491966085  | 0.002326503 | 0.039050674 |
| ENSMUSG00000000295 | Hddc2         | 0.379405841  | 0.002352712 | 0.039384142 |
| ENSMUSG00000056836 | Gm6851        | 0.324625473  | 0.002350318 | 0.039384142 |
| ENSMUSG00000029283 | Cdc7          | -0.371525356 | 0.002365417 | 0.03949039  |
| ENSMUSG00000044328 | Trp53i13      | -0.48676089  | 0.002364207 | 0.03949039  |
| ENSMUSG00000026637 | Traf5         | -0.57824698  | 0.002380543 | 0.039662895 |
| ENSMUSG00000037601 | Nme1          | 0.371126328  | 0.002382137 | 0.039662895 |
| ENSMUSG00000029642 | Polr1d        | 0.337573429  | 0.002421913 | 0.040110109 |
| ENSMUSG00000037363 | Letm2         | -0.649471143 | 0.002415209 | 0.040110109 |
| ENSMUSG00000039294 | Cybc1         | -0.555777959 | 0.00242021  | 0.040110109 |
| ENSMUSG00000113948 | Rpl17-ps3     | 0.347797071  | 0.002419175 | 0.040110109 |
| ENSMUSG00000058558 | Rpl5          | 0.376061554  | 0.002426989 | 0.040140646 |
| ENSMUSG00000016756 | Cmah          | 0.393073729  | 0.002430225 | 0.040140723 |
| ENSMUSG00000026349 | Ccnt2         | -0.516764529 | 0.002435134 | 0.040168389 |
| ENSMUSG00000023990 | Tfeb          | -0.610343644 | 0.002445755 | 0.040290082 |
| ENSMUSG00000074865 | Zfp934        | -0.454303712 | 0.00245384  | 0.040369735 |
| ENSMUSG00000025155 | Dus1l         | 0.248405984  | 0.002472939 | 0.040541652 |
| ENSMUSG00000025613 | Cct8          | 0.325856317  | 0.002474082 | 0.040541652 |
| ENSMUSG00000075040 | Zfp408        | -0.591409681 | 0.002470248 | 0.040541652 |
| ENSMUSG00000067367 | Lyar          | 0.357160318  | 0.002478009 | 0.04055251  |
| ENSMUSG00000020818 | Mfsd11        | -0.401831721 | 0.002488169 | 0.040611765 |
| ENSMUSG00000024807 | Syvn1         | -0.563679948 | 0.002485655 | 0.040611765 |
| ENSMUSG00000030738 | Eif3c         | 0.377221801  | 0.002496833 | 0.040671086 |
| ENSMUSG00000054405 | Dnajc8        | 0.295747913  | 0.002498353 | 0.040671086 |
| ENSMUSG00000071669 | Snx29         | -0.567962518 | 0.002509019 | 0.040791258 |
| ENSMUSG00000026895 | Ndufa8        | 0.27801012   | 0.002517236 | 0.040818001 |
| ENSMUSG00000042570 | Mier2         | -0.647153875 | 0.002517121 | 0.040818001 |
| ENSMUSG00000033769 | Exoc6b        | 0.728792986  | 0.002522684 | 0.040853009 |
| ENSMUSG00000059939 | 9430015G10Rik | -0.410207762 | 0.0025386   | 0.041057232 |
| ENSMUSG00000036948 | BC037034      | -0.536508192 | 0.002550225 | 0.041191609 |
| ENSMUSG00000024493 | Lars          | 0.27110259   | 0.002561782 | 0.041217485 |
| ENSMUSG00000030094 | Xpc           | 0.275158568  | 0.002559661 | 0.041217485 |
| ENSMUSG00000063952 | Brpf3         | -0.945142036 | 0.002560298 | 0.041217485 |
| ENSMUSG00000029017 | Pmpcb         | 0.465583156  | 0.002570796 | 0.041255626 |

|                    |            |              |             |             |
|--------------------|------------|--------------|-------------|-------------|
| ENSMUSG00000059824 | Dbp        | -0.615403295 | 0.002567504 | 0.041255626 |
| ENSMUSG00000000686 | Abhd15     | -0.495824666 | 0.002614039 | 0.041800599 |
| ENSMUSG00000024070 | Prkd3      | -0.362392412 | 0.002615151 | 0.041800599 |
| ENSMUSG00000026307 | Scly       | -0.578916113 | 0.002618216 | 0.041800599 |
| ENSMUSG00000039013 | Siglecf    | -0.431306459 | 0.002610467 | 0.041800599 |
| ENSMUSG00000049600 | Zbtb45     | -0.58340785  | 0.002626382 | 0.041877132 |
| ENSMUSG00000020017 | Hal        | -0.824403818 | 0.002637963 | 0.042007868 |
| ENSMUSG00000052738 | Suclg1     | 0.319754147  | 0.002659504 | 0.04229667  |
| ENSMUSG00000030060 | Hmces      | -0.369774855 | 0.002664853 | 0.042327551 |
| ENSMUSG00000030894 | Tpp1       | -0.319901701 | 0.002675422 | 0.042366728 |
| ENSMUSG00000033773 | Rpap2      | -0.392888994 | 0.002680964 | 0.042366728 |
| ENSMUSG00000045639 | Zfp629     | -0.157894306 | 0.002677466 | 0.042366728 |
| ENSMUSG00000074846 | Gm10774    | 0.312240016  | 0.002678216 | 0.042366728 |
| ENSMUSG00000039304 | Tnfsf10    | 0.730134013  | 0.002708291 | 0.042744192 |
| ENSMUSG00000066626 | Gm5121     | 1.281956627  | 0.002727299 | 0.042989562 |
| ENSMUSG00000026648 | Dclre1c    | -0.491685796 | 0.002731387 | 0.042999115 |
| ENSMUSG00000090625 | Gm20721    | -0.33024668  | 0.002734828 | 0.042999115 |
| ENSMUSG00000020593 | Lpin1      | -0.952230557 | 0.002738291 | 0.042999125 |
| ENSMUSG00000020196 | Cabin1     | -0.464411338 | 0.002771998 | 0.043279518 |
| ENSMUSG00000031320 | Rps4x      | 0.355990637  | 0.002773569 | 0.043279518 |
| ENSMUSG00000032531 | Amotl2     | -0.949607641 | 0.002769689 | 0.043279518 |
| ENSMUSG00000057322 | Rpl38      | 0.293130312  | 0.002766616 | 0.043279518 |
| ENSMUSG00000057788 | Ddx49      | 0.29801807   | 0.002762183 | 0.043279518 |
| ENSMUSG00000020766 | Galk1      | 0.346052051  | 0.002780828 | 0.043292674 |
| ENSMUSG00000038811 | Gngt2      | 0.440529101  | 0.002784868 | 0.043292674 |
| ENSMUSG00000104421 | Rpl18-ps1  | 0.870993974  | 0.00278441  | 0.043292674 |
| ENSMUSG00000058099 | Nfam1      | -0.411083256 | 0.002802436 | 0.043511326 |
| ENSMUSG00000021290 | Atp5mpl    | 0.246461545  | 0.002813895 | 0.043580279 |
| ENSMUSG00000037095 | Lrg1       | 0.570287225  | 0.002811433 | 0.043580279 |
| ENSMUSG00000026766 | Mmadhc     | 0.249579278  | 0.002823163 | 0.043615057 |
| ENSMUSG00000047702 | Olfr1388   | 0.381986791  | 0.002822802 | 0.043615057 |
| ENSMUSG00000054823 | Nsd3       | -0.367702449 | 0.002831754 | 0.043693439 |
| ENSMUSG00000066443 | Gm10163    | 0.306265518  | 0.002836017 | 0.043704918 |
| ENSMUSG00000027219 | Slc28a2    | 0.355474708  | 0.002853384 | 0.043918067 |
| ENSMUSG00000008668 | Rps18      | 0.290744181  | 0.002872584 | 0.044120531 |
| ENSMUSG00000021737 | Psm6       | 0.254389415  | 0.002873642 | 0.044120531 |
| ENSMUSG00000032915 | Adgre4     | -0.986039433 | 0.002880146 | 0.044165802 |
| ENSMUSG00000024431 | Nr3c1      | -0.372834184 | 0.002888998 | 0.044192414 |
| ENSMUSG00000029623 | Pdap1      | 0.446032817  | 0.002888618 | 0.044192414 |
| ENSMUSG00000023043 | Krt18      | -0.540441974 | 0.002894458 | 0.044221485 |
| ENSMUSG00000081895 | Rpl17-ps10 | 0.444297016  | 0.002899469 | 0.044243616 |
| ENSMUSG00000033088 | Triobp     | -0.398573948 | 0.002903409 | 0.044249371 |
| ENSMUSG00000020482 | Ccdc117    | -0.39940864  | 0.002919916 | 0.044446415 |

|                    |          |              |             |             |
|--------------------|----------|--------------|-------------|-------------|
| ENSMUSG00000032120 | C2cd2l   | -0.603824133 | 0.00296012  | 0.045003245 |
| ENSMUSG00000006057 | Atp5g1   | 0.342491946  | 0.002976219 | 0.04500922  |
| ENSMUSG00000020180 | Snrpd3   | 0.581878953  | 0.002973243 | 0.04500922  |
| ENSMUSG00000023106 | Denr     | 0.358087331  | 0.002978631 | 0.04500922  |
| ENSMUSG00000031519 | Asb5     | -0.605799423 | 0.002970687 | 0.04500922  |
| ENSMUSG00000035757 | Selenoo  | -0.390031005 | 0.002972964 | 0.04500922  |
| ENSMUSG00000036850 | Mrpl41   | 0.255755609  | 0.002991622 | 0.045150584 |
| ENSMUSG00000036371 | Serbp1   | 0.258611628  | 0.003024785 | 0.045491978 |
| ENSMUSG00000041355 | Ssr2     | 0.289654983  | 0.003019862 | 0.045491978 |
| ENSMUSG00000044827 | Tlr1     | -0.622198766 | 0.003025229 | 0.045491978 |
| ENSMUSG00000000732 | Icosl    | -0.841121132 | 0.00303973  | 0.045616356 |
| ENSMUSG00000005779 | Psmb4    | 0.395617034  | 0.003040846 | 0.045616356 |
| ENSMUSG00000038766 | Gabpb2   | -0.445956638 | 0.003046543 | 0.045629709 |
| ENSMUSG00000074102 | Rbm15b   | -0.466455833 | 0.003049083 | 0.045629709 |
| ENSMUSG00000020522 | Mfap3    | -0.304867165 | 0.003057127 | 0.045695032 |
| ENSMUSG00000054708 | Ankrd24  | -0.842587821 | 0.003063696 | 0.045738176 |
| ENSMUSG00000068039 | Tcp1     | 0.266765787  | 0.003093602 | 0.046129212 |
| ENSMUSG00000038462 | Uqcrrfs1 | 0.294822033  | 0.003105725 | 0.046254456 |
| ENSMUSG00000046207 | Pik3r6   | -0.465391833 | 0.003115643 | 0.046291155 |
| ENSMUSG00000071072 | Ptges3   | 0.293291752  | 0.003112748 | 0.046291155 |
| ENSMUSG00000070834 | Gm13015  | 0.384300384  | 0.003140771 | 0.046608739 |
| ENSMUSG00000057036 | Gm7536   | 0.359415799  | 0.003149714 | 0.046685681 |
| ENSMUSG00000039163 | Cmc1     | 0.307297319  | 0.003158693 | 0.046707287 |
| ENSMUSG00000062933 | Gm10123  | 0.235063347  | 0.003158335 | 0.046707287 |
| ENSMUSG00000011427 | Zfp790   | -0.572189566 | 0.003170869 | 0.046743176 |
| ENSMUSG00000020733 | Slc9a3r1 | -0.239567335 | 0.003176097 | 0.046743176 |
| ENSMUSG00000031154 | Otud5    | -0.389598618 | 0.003176173 | 0.046743176 |
| ENSMUSG00000038563 | Efl1     | 0.353509717  | 0.003173438 | 0.046743176 |
| ENSMUSG00000000355 | Mcts1    | 0.244711182  | 0.003183801 | 0.046759699 |
| ENSMUSG00000015671 | Psma2    | 0.30180664   | 0.003189887 | 0.046759699 |
| ENSMUSG00000017697 | Ada      | 0.468128052  | 0.003203647 | 0.046759699 |
| ENSMUSG00000033191 | Tie1     | -0.599607983 | 0.003199334 | 0.046759699 |
| ENSMUSG00000043008 | Klhl6    | -0.299592798 | 0.003201393 | 0.046759699 |
| ENSMUSG00000044533 | Rps2     | 0.403975995  | 0.00319894  | 0.046759699 |
| ENSMUSG00000050856 | Atp5k    | 0.277038662  | 0.003190838 | 0.046759699 |
| ENSMUSG00000004221 | lkbkg    | -0.433628251 | 0.003214534 | 0.046798223 |
| ENSMUSG00000005364 | Il5ra    | -1.053692111 | 0.003217363 | 0.046798223 |
| ENSMUSG00000021079 | Timm9    | 0.386627739  | 0.00321759  | 0.046798223 |
| ENSMUSG00000032902 | Slc16a1  | 0.48617383   | 0.003223848 | 0.046831574 |
| ENSMUSG00000054836 | Elp6     | 0.372906076  | 0.003227424 | 0.046831574 |
| ENSMUSG00000028266 | Lmo4     | -0.342178361 | 0.003253192 | 0.046985935 |
| ENSMUSG00000043866 | Taf10    | 0.296242905  | 0.003252433 | 0.046985935 |
| ENSMUSG00000049307 | Fut4     | -0.500000904 | 0.003250488 | 0.046985935 |

|                     |          |              |             |             |
|---------------------|----------|--------------|-------------|-------------|
| ENSMUSG00000049960  | Mrps16   | 0.269074685  | 0.003247359 | 0.046985935 |
| ENSMUSG00000014313  | Cox6c    | 0.269438425  | 0.00326243  | 0.04706462  |
| ENSMUSG00000002028  | Kmt2a    | -0.532398405 | 0.003272442 | 0.047099653 |
| ENSMUSG000000051851 | Rtl8c    | -0.742678331 | 0.003270124 | 0.047099653 |
| ENSMUSG000000028367 | Txn1     | 0.219670391  | 0.003294004 | 0.047355114 |
| ENSMUSG000000097175 | Gm27018  | 0.346452033  | 0.003304727 | 0.047454346 |
| ENSMUSG000000116632 | Magef1   | -0.672458664 | 0.003313275 | 0.047522162 |
| ENSMUSG000000066491 | Cox6c2   | 0.278844607  | 0.003317529 | 0.047528288 |
| ENSMUSG000000020075 | Ddx21    | 0.539970103  | 0.003372297 | 0.048190475 |
| ENSMUSG000000032235 | Ice2     | -0.460808187 | 0.00337539  | 0.048190475 |
| ENSMUSG000000055447 | Cd47     | 0.269844961  | 0.003369064 | 0.048190475 |
| ENSMUSG000000058794 | Nfe2     | -0.297147459 | 0.003400258 | 0.048489792 |
| ENSMUSG000000048279 | Sacs     | 0.679228184  | 0.003411024 | 0.048587527 |
| ENSMUSG00000000278  | Scpep1   | -0.495829008 | 0.003423112 | 0.048691568 |
| ENSMUSG000000025158 | Rfng     | -0.352650652 | 0.003428354 | 0.048691568 |
| ENSMUSG000000037361 | Sf3b6    | 0.239628812  | 0.003434008 | 0.048691568 |
| ENSMUSG000000051727 | Kctd14   | -0.501559003 | 0.003431493 | 0.048691568 |
| ENSMUSG000000047881 | Rell1    | -0.413694972 | 0.003439981 | 0.048720646 |
| ENSMUSG000000050410 | Tcf19    | -0.3975821   | 0.003449455 | 0.048799184 |
| ENSMUSG000000063849 | Ppcdc    | -0.475981697 | 0.003456406 | 0.04884189  |
| ENSMUSG000000027411 | Vps16    | -0.291870335 | 0.003493262 | 0.0493066   |
| ENSMUSG000000013973 | Dedd     | -0.388329876 | 0.003509428 | 0.049478558 |
| ENSMUSG000000031007 | Atp6ap2  | 0.282503239  | 0.003543747 | 0.049849243 |
| ENSMUSG000000086721 | Gm13750  | 0.694686825  | 0.003541475 | 0.049849243 |
| ENSMUSG000000000787 | Ddx3x    | 0.608663746  | 0.003557325 | 0.049983639 |
| ENSMUSG000000004558 | Ndrg2    | 0.507530175  | 0.003573953 | 0.049991074 |
| ENSMUSG000000026603 | Smyd2    | 0.260130411  | 0.003569955 | 0.049991074 |
| ENSMUSG000000036817 | Sun1     | -0.59023217  | 0.003565069 | 0.049991074 |
| ENSMUSG000000082044 | Snrpert  | 0.294034384  | 0.003566155 | 0.049991074 |
| ENSMUSG000000003200 | Sh3gl1   | -0.321033235 | 0.003613522 | 0.050156207 |
| ENSMUSG000000010751 | Tnfrsf22 | 0.520813808  | 0.003601259 | 0.050156207 |
| ENSMUSG000000015947 | Fcgr1    | 0.864077833  | 0.0036014   | 0.050156207 |
| ENSMUSG000000024283 | Wac      | -0.423572802 | 0.003618022 | 0.050156207 |
| ENSMUSG000000024457 | Trim26   | -0.3764439   | 0.003610425 | 0.050156207 |
| ENSMUSG000000028069 | Gpatch4  | 0.291283765  | 0.003618063 | 0.050156207 |
| ENSMUSG000000029304 | Spp1     | 0.405556649  | 0.00361586  | 0.050156207 |
| ENSMUSG000000071866 | Ppia     | 0.236164066  | 0.003590791 | 0.050156207 |
| ENSMUSG000000020321 | Mdh1     | 0.24839594   | 0.003624638 | 0.050191331 |
| ENSMUSG000000028609 | Magoh    | 0.277653399  | 0.00362893  | 0.050194805 |
| ENSMUSG000000039680 | Mrps6    | 0.342033834  | 0.003642408 | 0.050325193 |
| ENSMUSG000000011257 | Pabpc4   | 0.725014826  | 0.003652354 | 0.050396024 |
| ENSMUSG000000023571 | C1qtnf12 | -0.416580564 | 0.003655649 | 0.050396024 |
| ENSMUSG000000026566 | Mpzl1    | 0.744740484  | 0.003673069 | 0.050468128 |

|                    |            |              |             |             |
|--------------------|------------|--------------|-------------|-------------|
| ENSMUSG00000035929 | H2-Q4      | -0.544235996 | 0.003672313 | 0.050468128 |
| ENSMUSG00000038633 | Degs1      | -0.366765819 | 0.003667735 | 0.050468128 |
| ENSMUSG00000054604 | Cggbp1     | 0.284906406  | 0.003682743 | 0.050529571 |
| ENSMUSG00000083245 | Gm11185    | 1.151827087  | 0.003685677 | 0.050529571 |
| ENSMUSG00000029033 | Acap3      | -0.793338025 | 0.003702035 | 0.050697882 |
| ENSMUSG00000031068 | Glrx3      | 0.291337215  | 0.003715349 | 0.05082418  |
| ENSMUSG00000111611 | Olfr157    | -0.417303321 | 0.003730325 | 0.050972903 |
| ENSMUSG00000074417 | Gm14548    | -0.879697729 | 0.003749756 | 0.051182112 |
| ENSMUSG00000045730 | Adrb2      | -0.437777466 | 0.00375461  | 0.05119211  |
| ENSMUSG00000037251 | Pomk       | -0.332566353 | 0.003806872 | 0.051847757 |
| ENSMUSG00000038535 | Zfp280d    | -0.81929718  | 0.00381223  | 0.051863864 |
| ENSMUSG00000027531 | Impa1      | 0.266218995  | 0.003826468 | 0.051926435 |
| ENSMUSG00000037815 | Ctnna1     | -0.354637742 | 0.003826592 | 0.051926435 |
| ENSMUSG00000038880 | Mrps34     | 0.315545126  | 0.003829371 | 0.051926435 |
| ENSMUSG00000020873 | Slc35b1    | 0.346581118  | 0.00384426  | 0.052024415 |
| ENSMUSG00000022614 | Lmf2       | -0.409673052 | 0.003844973 | 0.052024415 |
| ENSMUSG00000067547 | Gm7666     | 0.363933542  | 0.003862751 | 0.052208082 |
| ENSMUSG00000018565 | Elp5       | 0.266576738  | 0.003881673 | 0.052383954 |
| ENSMUSG00000032359 | Ctsh       | -0.387358914 | 0.003884198 | 0.052383954 |
| ENSMUSG00000000673 | Haao       | -0.398481471 | 0.003901485 | 0.052503086 |
| ENSMUSG00000029475 | Kdm2b      | -0.540675984 | 0.003899442 | 0.052503086 |
| ENSMUSG00000049755 | Zfp672     | 0.374754187  | 0.003906741 | 0.052516909 |
| ENSMUSG00000035885 | Cox8a      | 0.243415107  | 0.003911669 | 0.052526312 |
| ENSMUSG00000022607 | Ptk2       | -0.59000606  | 0.003961389 | 0.05312974  |
| ENSMUSG00000047153 | Khyn       | -0.489332343 | 0.003969439 | 0.05312974  |
| ENSMUSG00000089669 | Tnfsf13    | 0.446817526  | 0.003969388 | 0.05312974  |
| ENSMUSG00000054611 | Kdm2a      | -0.36583966  | 0.004002094 | 0.053451625 |
| ENSMUSG00000071757 | Zhx2       | 0.041807974  | 0.004000646 | 0.053451625 |
| ENSMUSG00000006373 | Pgrmc1     | 0.303165084  | 0.004030461 | 0.053703351 |
| ENSMUSG00000052423 | B4galt3    | -0.303056903 | 0.004027177 | 0.053703351 |
| ENSMUSG00000062328 | Rpl17      | 0.386045561  | 0.004033912 | 0.053703351 |
| ENSMUSG00000014763 | Fam120b    | -0.332883217 | 0.004052404 | 0.05384399  |
| ENSMUSG00000096964 | Gm6345     | -0.048847186 | 0.004053146 | 0.05384399  |
| ENSMUSG00000087150 | BC064078   | -0.51653622  | 0.004072927 | 0.054048966 |
| ENSMUSG00000049106 | Dcaf5      | -0.512919735 | 0.004088166 | 0.054193293 |
| ENSMUSG00000020176 | Grb10      | -0.773611916 | 0.00410059  | 0.054300028 |
| ENSMUSG00000039813 | Tbc1d2     | -0.351942053 | 0.004111619 | 0.054333806 |
| ENSMUSG00000045055 | Rpsa-ps2   | 0.920720942  | 0.004111889 | 0.054333806 |
| ENSMUSG00000014769 | Psmb1      | 0.255507629  | 0.004138618 | 0.054628884 |
| ENSMUSG00000004896 | Rrnad1     | -0.408710147 | 0.004149981 | 0.05470135  |
| ENSMUSG00000021631 | Mrps36-ps1 | 0.342307494  | 0.004154993 | 0.05470135  |
| ENSMUSG00000022752 | Tomm70a    | 0.316531321  | 0.004166128 | 0.05470135  |
| ENSMUSG00000029071 | Dvl1       | -0.683338315 | 0.004166041 | 0.05470135  |

|                    |               |              |             |             |
|--------------------|---------------|--------------|-------------|-------------|
| ENSMUSG00000056019 | Zfp709        | -0.608738543 | 0.004165945 | 0.05470135  |
| ENSMUSG00000049130 | C5ar1         | 0.719906111  | 0.004185674 | 0.054899949 |
| ENSMUSG00000072653 | Zfp783        | -0.470759345 | 0.004191941 | 0.054924159 |
| ENSMUSG00000005483 | Dnajb1        | -0.4049464   | 0.004216161 | 0.055036951 |
| ENSMUSG00000009207 | Lnpc          | 0.378960671  | 0.004214682 | 0.055036951 |
| ENSMUSG00000022651 | Retnlg        | -0.19917734  | 0.004218274 | 0.055036951 |
| ENSMUSG00000066621 | Tecpr1        | -0.679682767 | 0.004205205 | 0.055036951 |
| ENSMUSG00000093973 | Mrgpra2a      | 0.620617387  | 0.004231594 | 0.055152815 |
| ENSMUSG00000017309 | Cd300lg       | -0.679234179 | 0.0042416   | 0.055184757 |
| ENSMUSG00000047036 | Zfp445        | -0.416850966 | 0.004242931 | 0.055184757 |
| ENSMUSG00000029708 | Gcc1          | -0.711408004 | 0.004252182 | 0.055247225 |
| ENSMUSG00000004933 | Matk          | 0.285564135  | 0.004261388 | 0.055251253 |
| ENSMUSG00000025742 | Prps2         | 0.36132894   | 0.004259563 | 0.055251253 |
| ENSMUSG00000001380 | Hars          | 0.257414656  | 0.004289697 | 0.055502424 |
| ENSMUSG00000059981 | Taok2         | -0.377246208 | 0.004285283 | 0.055502424 |
| ENSMUSG00000049760 | 2410015M20Rik | 0.248822689  | 0.004295673 | 0.05552191  |
| ENSMUSG00000020272 | Stk10         | -0.740732771 | 0.004303716 | 0.055553606 |
| ENSMUSG00000029705 | Cux1          | -0.324601084 | 0.004309414 | 0.055553606 |
| ENSMUSG00000030431 | Tmem238       | 0.319545772  | 0.004316016 | 0.055553606 |
| ENSMUSG00000033444 | Specc1l       | -0.586588216 | 0.004311557 | 0.055553606 |
| ENSMUSG00000033933 | Vhl           | -0.372106284 | 0.00433512  | 0.055569171 |
| ENSMUSG00000035235 | Trim13        | 0.42105701   | 0.004324277 | 0.055569171 |
| ENSMUSG00000038406 | Scaf1         | -0.515902429 | 0.004328449 | 0.055569171 |
| ENSMUSG00000087701 | Gm13493       | 0.798172682  | 0.004331381 | 0.055569171 |
| ENSMUSG00000023908 | Pkmyt1        | -0.387398229 | 0.00434775  | 0.055673614 |
| ENSMUSG00000022982 | Sod1          | 0.331242816  | 0.00436472  | 0.055802907 |
| ENSMUSG00000047963 | Stbd1         | -0.935586211 | 0.004366832 | 0.055802907 |
| ENSMUSG00000029098 | Acox3         | -0.592109976 | 0.00437968  | 0.055909559 |
| ENSMUSG00000038518 | Jarid2        | -0.364189558 | 0.00440188  | 0.056135262 |
| ENSMUSG00000033752 | Mnd1          | 0.401109396  | 0.004410719 | 0.056190301 |
| ENSMUSG00000022476 | Polr3h        | 0.283565884  | 0.004436131 | 0.056398342 |
| ENSMUSG00000084416 | Rpl10a-ps1    | 0.23732123   | 0.00443405  | 0.056398342 |
| ENSMUSG00000031907 | Zfp90         | -0.446413351 | 0.004441352 | 0.056406989 |
| ENSMUSG00000079111 | Kdelr2        | 0.545308482  | 0.004447037 | 0.056421494 |
| ENSMUSG00000023967 | Mrps18a       | 0.252814824  | 0.004459172 | 0.056517728 |
| ENSMUSG00000004071 | Cdip1         | -0.38579824  | 0.004484635 | 0.0567247   |
| ENSMUSG00000030579 | Tyrobp        | -0.416989899 | 0.004481196 | 0.0567247   |
| ENSMUSG00000001763 | Tspan33       | -0.493993159 | 0.004495725 | 0.056749395 |
| ENSMUSG00000080242 | Atp6v0c-ps2   | 0.254951969  | 0.00449347  | 0.056749395 |
| ENSMUSG00000031971 | Ccsap         | -0.382615126 | 0.00451165  | 0.056858896 |
| ENSMUSG00000056124 | B4galt6       | 0.418156551  | 0.004513555 | 0.056858896 |
| ENSMUSG00000028478 | Clta          | 0.338753653  | 0.004527128 | 0.056918781 |
| ENSMUSG00000045917 | Tmem268       | -0.651113486 | 0.004527474 | 0.056918781 |

|                    |               |              |             |             |
|--------------------|---------------|--------------|-------------|-------------|
| ENSMUSG00000045165 | Al467606      | -0.262366198 | 0.004535431 | 0.056961167 |
| ENSMUSG00000080205 | Gm15526       | 0.362831354  | 0.004561505 | 0.057230761 |
| ENSMUSG00000027104 | Atf2          | -0.282919867 | 0.004584392 | 0.057412974 |
| ENSMUSG00000052926 | Rnaseh2a      | 0.273516451  | 0.004585273 | 0.057412974 |
| ENSMUSG00000040181 | Fmo1          | 0.446277115  | 0.004606694 | 0.057565134 |
| ENSMUSG00000048285 | Frmd6         | 0.76370331   | 0.004603095 | 0.057565134 |
| ENSMUSG00000051675 | Trim32        | -0.651943372 | 0.004623121 | 0.05771235  |
| ENSMUSG00000021322 | Aoah          | -0.358714    | 0.004628627 | 0.057723074 |
| ENSMUSG00000063234 | Gpr84         | 0.669981263  | 0.004647707 | 0.057902879 |
| ENSMUSG00000020175 | Rab36         | -0.890324911 | 0.004653066 | 0.05791155  |
| ENSMUSG00000037548 | H2-DMb2       | -0.408111422 | 0.004666325 | 0.058018442 |
| ENSMUSG00000020018 | Snrpf         | 0.274845313  | 0.004675374 | 0.05803704  |
| ENSMUSG00000074093 | Svip          | 0.253602418  | 0.004677166 | 0.05803704  |
| ENSMUSG00000020828 | Pld2          | -0.214496569 | 0.004690408 | 0.058049712 |
| ENSMUSG00000040521 | Tsfm          | 0.24223973   | 0.004682967 | 0.058049712 |
| ENSMUSG00000052688 | Rab7b         | -0.301394465 | 0.004692208 | 0.058049712 |
| ENSMUSG00000052485 | Tmem171       | 1.017478695  | 0.004706785 | 0.058172113 |
| ENSMUSG00000029621 | Arpc1a        | -0.294952767 | 0.004725676 | 0.058313164 |
| ENSMUSG00000061894 | Zscan20       | -0.971699489 | 0.004727587 | 0.058313164 |
| ENSMUSG00000029038 | Ssu72         | 0.271971911  | 0.004750639 | 0.058539376 |
| ENSMUSG00000029471 | Camkk2        | -0.432075817 | 0.004756209 | 0.058549926 |
| ENSMUSG00000034412 | Tbc1d10a      | -0.384443889 | 0.004761958 | 0.058562655 |
| ENSMUSG00000007817 | Zmiz1         | -0.549104643 | 0.004795312 | 0.05891451  |
| ENSMUSG00000026102 | Inpp1         | 0.371005785  | 0.004806173 | 0.058989596 |
| ENSMUSG00000030095 | Tmem43        | -0.290607104 | 0.004815854 | 0.059050076 |
| ENSMUSG00000023944 | Hsp90ab1      | 0.382765519  | 0.004839461 | 0.059281007 |
| ENSMUSG00000025151 | Maged1        | 0.4226558    | 0.004851188 | 0.059366115 |
| ENSMUSG00000045886 | Gm9803        | 0.284141086  | 0.004866224 | 0.059491504 |
| ENSMUSG00000013593 | Ndufs2        | 0.266314807  | 0.004885746 | 0.059612816 |
| ENSMUSG00000030655 | Smg1          | -0.455327957 | 0.004885568 | 0.059612816 |
| ENSMUSG00000052825 | Gm9892        | 0.292371834  | 0.00491127  | 0.059865443 |
| ENSMUSG00000032051 | Fdx1          | 0.265380593  | 0.004954417 | 0.060273085 |
| ENSMUSG00000074497 | A430078G23Rik | -0.453513229 | 0.004953096 | 0.060273085 |
| ENSMUSG00000078656 | Vps25         | 0.211781969  | 0.004959932 | 0.060281129 |
| ENSMUSG00000029528 | Pxn           | -0.641398801 | 0.004969662 | 0.060340343 |
| ENSMUSG00000024067 | Dpy30         | 0.247873551  | 0.00499211  | 0.060541228 |
| ENSMUSG00000034664 | Itga2b        | -0.445455038 | 0.004995955 | 0.060541228 |
| ENSMUSG00000019971 | Cep290        | -0.344722441 | 0.005008699 | 0.060577454 |
| ENSMUSG00000025354 | Dnajc14       | -0.365648167 | 0.005004063 | 0.060577454 |
| ENSMUSG00000025224 | Gbf1          | -0.337785852 | 0.005016487 | 0.060596087 |
| ENSMUSG00000039347 | Atp6v0e2      | -0.391606487 | 0.005019996 | 0.060596087 |
| ENSMUSG00000021756 | Il6st         | -0.821608548 | 0.005027943 | 0.060633084 |
| ENSMUSG00000005142 | Man2b1        | -0.372931928 | 0.005053723 | 0.060884861 |

|                    |               |              |             |             |
|--------------------|---------------|--------------|-------------|-------------|
| ENSMUSG00000019082 | Slc25a22      | -0.430928858 | 0.005075947 | 0.061019213 |
| ENSMUSG00000020846 | Rflnb         | 0.37612661   | 0.005079612 | 0.061019213 |
| ENSMUSG00000024521 | Pmaip1        | 0.587784697  | 0.00507421  | 0.061019213 |
| ENSMUSG00000020956 | Dtd2          | 0.303087896  | 0.005089924 | 0.061028692 |
| ENSMUSG00000031851 | Ntpcr         | 0.26187639   | 0.005090228 | 0.061028692 |
| ENSMUSG00000037740 | Mrps26        | 0.237192887  | 0.005100732 | 0.061095651 |
| ENSMUSG00000015468 | Notch4        | -0.094192017 | 0.005118851 | 0.061253606 |
| ENSMUSG00000042350 | Arel1         | 0.544294775  | 0.005143276 | 0.061486652 |
| ENSMUSG00000017670 | Elmo2         | -0.482018009 | 0.005191943 | 0.061699591 |
| ENSMUSG00000020219 | Timm13        | 0.282974284  | 0.005194439 | 0.061699591 |
| ENSMUSG00000028076 | Cd1d1         | -0.387214259 | 0.005169705 | 0.061699591 |
| ENSMUSG00000052033 | Pfdn4         | 0.302853607  | 0.005186781 | 0.061699591 |
| ENSMUSG00000052962 | Mrpl35        | 0.30688792   | 0.00519586  | 0.061699591 |
| ENSMUSG00000074227 | Spint2        | 0.280856374  | 0.005194807 | 0.061699591 |
| ENSMUSG00000076435 | Acsf2         | -0.106694846 | 0.00518542  | 0.061699591 |
| ENSMUSG00000063696 | Gm8730        | 0.692865179  | 0.005210973 | 0.061760963 |
| ENSMUSG00000100944 | Gm28900       | 0.341416137  | 0.00521064  | 0.061760963 |
| ENSMUSG00000022255 | Mtdh          | 0.289700526  | 0.005224618 | 0.061863666 |
| ENSMUSG00000024661 | Fth1          | 0.287589324  | 0.005250227 | 0.06197251  |
| ENSMUSG00000026750 | Psmb7         | 0.253296248  | 0.005242031 | 0.06197251  |
| ENSMUSG00000093674 | Rpl41         | 0.261628757  | 0.005253768 | 0.06197251  |
| ENSMUSG00000115194 | Gm48909       | 0.350869919  | 0.005246692 | 0.06197251  |
| ENSMUSG00000020922 | Lsm12         | 0.349747574  | 0.005267236 | 0.062072431 |
| ENSMUSG00000022967 | Ifnar1        | -0.463895151 | 0.005284321 | 0.062214744 |
| ENSMUSG00000039377 | Hlx           | -0.411687119 | 0.005304282 | 0.06225167  |
| ENSMUSG00000040990 | Sh3kbp1       | -0.363831218 | 0.0052988   | 0.06225167  |
| ENSMUSG00000053600 | Zfp472        | -0.35479912  | 0.005307505 | 0.06225167  |
| ENSMUSG00000089785 | Slc25a5-ps    | 0.909674735  | 0.005293836 | 0.06225167  |
| ENSMUSG00000042541 | Sem1          | 0.198641476  | 0.005315666 | 0.062288577 |
| ENSMUSG00000034613 | Ppm1h         | -0.415790086 | 0.005348008 | 0.062608488 |
| ENSMUSG00000048142 | Nat8l         | -0.102679758 | 0.00535362  | 0.062615174 |
| ENSMUSG00000046562 | Unc119b       | -0.535028918 | 0.005360533 | 0.062637048 |
| ENSMUSG00000021576 | Pdcd6         | 0.235787383  | 0.00538147  | 0.062822595 |
| ENSMUSG00000098156 | Gm27023       | 0.558317643  | 0.0053946   | 0.062916742 |
| ENSMUSG00000019254 | Ppp1r12c      | -0.327902027 | 0.005399882 | 0.062919257 |
| ENSMUSG00000024187 | Fam234a       | -0.535658412 | 0.005440116 | 0.063328657 |
| ENSMUSG00000020250 | Txnrd1        | 0.259606898  | 0.005471678 | 0.063517488 |
| ENSMUSG00000052419 | 2610001J05Rik | 0.221647774  | 0.005467189 | 0.063517488 |
| ENSMUSG00000062743 | Zfp677        | -0.52758551  | 0.005471457 | 0.063517488 |
| ENSMUSG00000026826 | Nr4a2         | -0.172087794 | 0.005482444 | 0.063523729 |
| ENSMUSG00000060777 | Gm10087       | -0.86669565  | 0.005482332 | 0.063523729 |
| ENSMUSG0000002393  | Nr2f6         | -0.370524954 | 0.005496166 | 0.063623377 |
| ENSMUSG00000021773 | Comtd1        | 0.4399763    | 0.005521818 | 0.06379652  |

|                    |            |              |             |             |
|--------------------|------------|--------------|-------------|-------------|
| ENSMUSG00000028581 | Laptm5     | -0.318487628 | 0.005526532 | 0.06379652  |
| ENSMUSG00000045466 | Zfp956     | -0.462251193 | 0.005522883 | 0.06379652  |
| ENSMUSG00000011884 | Gltp       | -0.313074631 | 0.0055407   | 0.063841407 |
| ENSMUSG00000062006 | Rpl34      | 0.230641273  | 0.005536876 | 0.063841407 |
| ENSMUSG00000002608 | Ccdc97     | -0.350476527 | 0.005585197 | 0.064003684 |
| ENSMUSG00000028495 | Rps6       | 0.251845954  | 0.005581581 | 0.064003684 |
| ENSMUSG00000028676 | Srsf10     | 0.230011381  | 0.005576144 | 0.064003684 |
| ENSMUSG00000030751 | Psma1      | 0.228679613  | 0.005580532 | 0.064003684 |
| ENSMUSG00000036427 | Gpi1       | 0.292131311  | 0.005585701 | 0.064003684 |
| ENSMUSG00000075370 | Igll1      | 0.632922179  | 0.005584209 | 0.064003684 |
| ENSMUSG00000003154 | Foxj2      | -0.775357403 | 0.005607551 | 0.064076712 |
| ENSMUSG00000027397 | Slc20a1    | -0.462788282 | 0.00560069  | 0.064076712 |
| ENSMUSG00000033540 | Idua       | -0.59679904  | 0.00560441  | 0.064076712 |
| ENSMUSG00000006471 | Ndor1      | -0.28966445  | 0.005621611 | 0.064178333 |
| ENSMUSG00000020564 | Atxn7l1    | -0.319546732 | 0.005636323 | 0.064275283 |
| ENSMUSG00000055795 | Gm5160     | 0.617983715  | 0.005640452 | 0.064275283 |
| ENSMUSG00000028729 | Ebna1bp2   | 0.284031278  | 0.005664797 | 0.064493528 |
| ENSMUSG00000037185 | Krt80      | -0.758279437 | 0.005672569 | 0.06452288  |
| ENSMUSG00000026199 | Ankzf1     | -0.330832284 | 0.005692342 | 0.064662313 |
| ENSMUSG00000042333 | Tnfrsf14   | -0.621464769 | 0.00569524  | 0.064662313 |
| ENSMUSG00000026104 | Stat1      | -0.447995712 | 0.005706101 | 0.064726469 |
| ENSMUSG00000014551 | Mrps25     | 0.23470656   | 0.005713828 | 0.064750011 |
| ENSMUSG00000089739 | Gm20431    | -0.608058396 | 0.005718603 | 0.064750011 |
| ENSMUSG00000002320 | Tm9sf1     | -0.31156334  | 0.005750639 | 0.06505345  |
| ENSMUSG00000060288 | Ppih       | 0.282391178  | 0.005769988 | 0.065212944 |
| ENSMUSG00000021120 | Pigh       | -0.315894334 | 0.00578873  | 0.065305915 |
| ENSMUSG00000025068 | Gsto1      | 0.25588026   | 0.005787512 | 0.065305915 |
| ENSMUSG00000105965 | Cyca-ps2   | 0.93016826   | 0.005794015 | 0.065306221 |
| ENSMUSG00000117256 | AC154779.4 | 0.428858639  | 0.005820393 | 0.065544061 |
| ENSMUSG00000029404 | Arl6ip4    | 0.259271116  | 0.005842288 | 0.065698141 |
| ENSMUSG00000070490 | Gm10293    | 0.964186086  | 0.005844654 | 0.065698141 |
| ENSMUSG00000035299 | Mid1       | 0.116950791  | 0.005875837 | 0.065929332 |
| ENSMUSG00000036452 | Arhgap26   | -0.356240959 | 0.005871142 | 0.065929332 |
| ENSMUSG00000000365 | Rnf17      | -0.697456705 | 0.005892221 | 0.066038624 |
| ENSMUSG00000039117 | Taf4       | -0.183997084 | 0.005896211 | 0.066038624 |
| ENSMUSG00000028830 | AU040320   | -0.615801958 | 0.00592463  | 0.066297146 |
| ENSMUSG00000040997 | Abhd4      | -0.349028133 | 0.005938101 | 0.066388075 |
| ENSMUSG00000061898 | Rbak       | -0.460782314 | 0.005952188 | 0.066485726 |
| ENSMUSG00000058325 | Dock1      | 0.592248121  | 0.005992039 | 0.066810699 |
| ENSMUSG00000105796 | Gm42845    | 0.316681784  | 0.005991611 | 0.066810699 |
| ENSMUSG00000071041 | Impdh2-ps  | 0.397803169  | 0.006001375 | 0.066854776 |
| ENSMUSG00000020868 | Xylt2      | -0.595787019 | 0.006011359 | 0.066905996 |
| ENSMUSG00000006589 | Aprt       | 0.265576255  | 0.006051735 | 0.067080321 |

|                    |               |              |             |             |
|--------------------|---------------|--------------|-------------|-------------|
| ENSMUSG00000015980 | Lrrc27        | 0.561284368  | 0.006044682 | 0.067080321 |
| ENSMUSG00000024610 | Cd74          | -0.17194928  | 0.006050464 | 0.067080321 |
| ENSMUSG00000032249 | Anp32a        | 0.571470153  | 0.006033026 | 0.067080321 |
| ENSMUSG00000034327 | Kctd9         | -0.527070439 | 0.006054025 | 0.067080321 |
| ENSMUSG00000031226 | Pbdc1         | 0.222334014  | 0.006067767 | 0.067172674 |
| ENSMUSG00000037465 | Klf10         | -0.475091797 | 0.00607834  | 0.067184781 |
| ENSMUSG00000058603 | Rpl28-ps1     | 0.301633198  | 0.006079679 | 0.067184781 |
| ENSMUSG00000024325 | Ring1         | -0.456703563 | 0.006102164 | 0.067373315 |
| ENSMUSG00000015536 | Mocs2         | 0.270094018  | 0.006129851 | 0.067520475 |
| ENSMUSG00000030399 | Ckm           | -0.625510303 | 0.006127833 | 0.067520475 |
| ENSMUSG00000045252 | Zfp574        | -0.373239519 | 0.006131801 | 0.067520475 |
| ENSMUSG00000024539 | Ptpn2         | 0.241774223  | 0.006142272 | 0.067558711 |
| ENSMUSG00000034880 | Mrpl34        | 0.259307661  | 0.006146151 | 0.067558711 |
| ENSMUSG00000001305 | Rrp15         | 0.300027484  | 0.006166586 | 0.06764284  |
| ENSMUSG00000018999 | Slc35b4       | -0.41266813  | 0.006170142 | 0.06764284  |
| ENSMUSG00000062944 | 9130023H24Rik | -0.502340621 | 0.006161994 | 0.06764284  |
| ENSMUSG00000021929 | Kpna3         | 0.40242782   | 0.006204074 | 0.067954848 |
| ENSMUSG00000014504 | Srp19         | 0.264888991  | 0.006230242 | 0.068181358 |
| ENSMUSG00000031221 | Igbp1         | 0.304499204  | 0.006243757 | 0.068215059 |
| ENSMUSG00000037108 | Zcwpw1        | -0.520916655 | 0.006244306 | 0.068215059 |
| ENSMUSG00000084786 | Ubl5          | 0.241294485  | 0.00625556  | 0.068277956 |
| ENSMUSG00000019843 | Fyn           | -0.488338299 | 0.006276911 | 0.068450843 |
| ENSMUSG00000020561 | Twistnb       | 0.36045457   | 0.00629726  | 0.068612519 |
| ENSMUSG00000028356 | Ambp          | 0.132129979  | 0.006310529 | 0.068696832 |
| ENSMUSG00000054381 | Zfp747        | -0.447330549 | 0.006326173 | 0.06875513  |
| ENSMUSG00000084221 | Hmgb1-ps4     | 0.808572492  | 0.006329793 | 0.06875513  |
| ENSMUSG00000091803 | Cox16         | 0.245663681  | 0.006332491 | 0.06875513  |
| ENSMUSG00000091549 | Gm6548        | 0.651695831  | 0.00635656  | 0.068956189 |
| ENSMUSG00000022223 | Sdr39u1       | 0.378758734  | 0.006376796 | 0.069055088 |
| ENSMUSG00000038759 | Nup205        | 0.506197233  | 0.00637318  | 0.069055088 |
| ENSMUSG00000066149 | Cdc26         | 0.227630268  | 0.006409963 | 0.069353784 |
| ENSMUSG00000117975 | Itrip         | -0.386249144 | 0.006415875 | 0.069357343 |
| ENSMUSG00000025781 | Atp5c1        | 0.243795761  | 0.006437138 | 0.069526684 |
| ENSMUSG00000024841 | Eif1ad        | 0.237326535  | 0.006450843 | 0.069595993 |
| ENSMUSG00000040761 | Spn           | -0.33266301  | 0.006454761 | 0.069595993 |
| ENSMUSG00000051483 | Cbr1          | 0.289913582  | 0.006466484 | 0.06966192  |
| ENSMUSG00000034640 | Tiparp        | -0.29763569  | 0.006515758 | 0.07013192  |
| ENSMUSG00000000827 | Tpd52l2       | 0.262494091  | 0.006541206 | 0.070344867 |
| ENSMUSG00000000682 | Cd52          | -0.342267619 | 0.006584706 | 0.070751413 |
| ENSMUSG00000001029 | Icam2         | 0.344006138  | 0.00660248  | 0.070758762 |
| ENSMUSG00000018427 | Ypel2         | -0.449605586 | 0.006600402 | 0.070758762 |
| ENSMUSG00000024294 | Mib1          | 0.586283651  | 0.006592129 | 0.070758762 |
| ENSMUSG00000059070 | Rpl18         | 0.28335058   | 0.00663913  | 0.071090197 |

|                    |               |              |             |             |
|--------------------|---------------|--------------|-------------|-------------|
| ENSMUSG00000034656 | Cacna1a       | -0.615476649 | 0.006660519 | 0.071196477 |
| ENSMUSG00000074671 | Tspyl3        | -0.396000022 | 0.006657455 | 0.071196477 |
| ENSMUSG00000026511 | Srp9          | 0.25377835   | 0.006671282 | 0.071250212 |
| ENSMUSG00000014226 | Cacybp        | 0.28179401   | 0.006721769 | 0.071359906 |
| ENSMUSG00000017176 | Nt5c3b        | 0.299135617  | 0.006719968 | 0.071359906 |
| ENSMUSG00000021361 | Tmem14c       | 0.280320281  | 0.006704052 | 0.071359906 |
| ENSMUSG00000024667 | Tmem216       | 0.342116244  | 0.006699071 | 0.071359906 |
| ENSMUSG00000029551 | Psmg3         | 0.292516932  | 0.006709914 | 0.071359906 |
| ENSMUSG00000062963 | Ufc1          | 0.239348729  | 0.006690963 | 0.071359906 |
| ENSMUSG00000075706 | Gpx4          | 0.214636138  | 0.006713314 | 0.071359906 |
| ENSMUSG00000004980 | Hnrnpa2b1     | 0.274745259  | 0.006786337 | 0.071528393 |
| ENSMUSG00000021707 | Dhfr          | 0.239945084  | 0.006789468 | 0.071528393 |
| ENSMUSG00000024515 | Smad4         | -0.4362632   | 0.006783729 | 0.071528393 |
| ENSMUSG00000025537 | Phkg1         | -0.49083769  | 0.006782217 | 0.071528393 |
| ENSMUSG00000027618 | Nfs1          | 0.24589051   | 0.006767615 | 0.071528393 |
| ENSMUSG00000029993 | Nfu1          | 0.221414939  | 0.006771046 | 0.071528393 |
| ENSMUSG00000032604 | Qars          | 0.360091452  | 0.006753643 | 0.071528393 |
| ENSMUSG00000058050 | Gm9234        | 0.608435633  | 0.006760111 | 0.071528393 |
| ENSMUSG00000070732 | Rbm44         | -0.706664527 | 0.006768388 | 0.071528393 |
| ENSMUSG00000059820 | Nkapd1        | 0.306763381  | 0.006811961 | 0.071704549 |
| ENSMUSG00000029056 | Pank4         | -0.273065126 | 0.006828153 | 0.071814131 |
| ENSMUSG00000056290 | Ms4a4b        | -0.470519743 | 0.006847828 | 0.07196013  |
| ENSMUSG00000031101 | Sash3         | -0.276299728 | 0.006890747 | 0.072349934 |
| ENSMUSG00000000594 | Gm2a          | -0.267103241 | 0.006902059 | 0.072407492 |
| ENSMUSG00000001143 | Lman2l        | -0.334717988 | 0.006929695 | 0.072594654 |
| ENSMUSG00000004849 | Ap1s1         | 0.248039788  | 0.006931588 | 0.072594654 |
| ENSMUSG00000037190 | Cyb561d2      | 0.264180815  | 0.006939884 | 0.072620305 |
| ENSMUSG00000091478 | Gm10039       | 0.290489459  | 0.006970317 | 0.072877361 |
| ENSMUSG00000020843 | Timm22        | 0.22874962   | 0.0069785   | 0.072901556 |
| ENSMUSG00000053553 | 3110082l17Rik | 0.251923158  | 0.006992089 | 0.072933047 |
| ENSMUSG00000082097 | Gm14039       | 0.40077934   | 0.006993258 | 0.072933047 |
| ENSMUSG00000025234 | Arih1         | -0.387566986 | 0.00701309  | 0.073078519 |
| ENSMUSG00000020460 | Rps27a        | 0.314633472  | 0.007043441 | 0.07333326  |
| ENSMUSG00000059486 | Kbtbd2        | -0.382992034 | 0.007087985 | 0.073673529 |
| ENSMUSG00000082099 | Gm12013       | 0.385335614  | 0.007084015 | 0.073673529 |
| ENSMUSG00000072692 | Rpl37rt       | 0.256159978  | 0.00709455  | 0.073680101 |
| ENSMUSG00000020708 | Psmc5         | 0.256601072  | 0.00711853  | 0.073833949 |
| ENSMUSG00000042308 | Setd1a        | -0.63740132  | 0.007121252 | 0.073833949 |
| ENSMUSG00000021996 | Esd           | 0.231680491  | 0.007141426 | 0.07398136  |
| ENSMUSG00000022377 | Asap1         | 0.379507703  | 0.007154566 | 0.074055722 |
| ENSMUSG00000044092 | C130050O18Rik | -0.506363125 | 0.007164498 | 0.074096782 |
| ENSMUSG00000071014 | Ndufb6        | 0.251022497  | 0.007192034 | 0.074319683 |
| ENSMUSG00000002767 | Mrpl2         | 0.259727749  | 0.007202416 | 0.074321524 |

|                    |               |              |             |             |
|--------------------|---------------|--------------|-------------|-------------|
| ENSMUSG00000038489 | Polr2l        | 0.245551426  | 0.00720418  | 0.074321524 |
| ENSMUSG00000031819 | Emc8          | 0.215618349  | 0.007221487 | 0.074438247 |
| ENSMUSG00000046862 | Pramef8       | -0.484199701 | 0.007269815 | 0.074874269 |
| ENSMUSG00000030316 | Tamm41        | 0.299386789  | 0.007303616 | 0.075038261 |
| ENSMUSG00000031807 | Pgls          | 0.284265401  | 0.007303861 | 0.075038261 |
| ENSMUSG00000040390 | Map3k10       | -0.474472601 | 0.007293177 | 0.075038261 |
| ENSMUSG00000004815 | Dgkq          | -0.602250673 | 0.007338258 | 0.075181606 |
| ENSMUSG00000022427 | Tomm22        | 0.362969614  | 0.007334347 | 0.075181606 |
| ENSMUSG00000030056 | Isy1          | 0.294154852  | 0.007328297 | 0.075181606 |
| ENSMUSG00000044751 | Gm12231       | 0.642375279  | 0.007345394 | 0.075181606 |
| ENSMUSG00000045411 | 2410002F23Rik | -0.280850978 | 0.007348077 | 0.075181606 |
| ENSMUSG00000032842 | Abcc10        | -0.612942907 | 0.007383057 | 0.075477323 |
| ENSMUSG00000031949 | Adat1         | -0.346508778 | 0.007393881 | 0.07552582  |
| ENSMUSG00000030604 | Zfp626        | -0.397383549 | 0.007414143 | 0.075670561 |
| ENSMUSG00000025393 | Atp5b         | 0.307094702  | 0.007436162 | 0.075717373 |
| ENSMUSG00000028991 | Mtor          | 0.366653962  | 0.007437018 | 0.075717373 |
| ENSMUSG00000052062 | Pard3b        | -0.601094926 | 0.007427898 | 0.075717373 |
| ENSMUSG00000029771 | Irf5          | -0.363637471 | 0.007447491 | 0.075761904 |
| ENSMUSG00000021065 | Fut8          | -0.289851614 | 0.007460928 | 0.075836482 |
| ENSMUSG00000001056 | Nhp2          | 0.32210841   | 0.007479859 | 0.075904677 |
| ENSMUSG00000028551 | Cdkn2c        | -0.319200415 | 0.007477971 | 0.075904677 |
| ENSMUSG00000016503 | Gtf3a         | 0.241702044  | 0.007491241 | 0.075958127 |
| ENSMUSG00000028086 | Fbxw7         | 0.071161934  | 0.007536541 | 0.076203797 |
| ENSMUSG00000032397 | Tipin         | 0.257700485  | 0.007521739 | 0.076203797 |
| ENSMUSG00000050945 | Zfp438        | -0.521191032 | 0.00754001  | 0.076203797 |
| ENSMUSG00000068882 | Ssb           | 0.320585747  | 0.00753469  | 0.076203797 |
| ENSMUSG00000024937 | Ehbp1l1       | -0.34642086  | 0.007549419 | 0.076236857 |
| ENSMUSG00000039936 | Pik3cd        | -0.35759782  | 0.0075781   | 0.076340287 |
| ENSMUSG00000057863 | Rpl36         | 0.315650386  | 0.007577097 | 0.076340287 |
| ENSMUSG00000066068 | Gm13611       | 0.29380124   | 0.007566786 | 0.076340287 |
| ENSMUSG00000024902 | Mrpl11        | 0.276265868  | 0.007612969 | 0.076456918 |
| ENSMUSG00000032563 | Mrpl3         | 0.274795558  | 0.007614299 | 0.076456918 |
| ENSMUSG00000038683 | Pak1ip1       | 0.232209328  | 0.007613659 | 0.076456918 |
| ENSMUSG00000058625 | Gm17383       | 0.501273268  | 0.007607239 | 0.076456918 |
| ENSMUSG00000025917 | Cops5         | 0.379602717  | 0.007629608 | 0.076486979 |
| ENSMUSG00000047139 | Cd24a         | 0.523387866  | 0.007624605 | 0.076486979 |
| ENSMUSG00000024300 | Myo1f         | -0.422186104 | 0.007656587 | 0.076695535 |
| ENSMUSG00000002210 | Smg9          | -0.445897986 | 0.007705934 | 0.077065542 |
| ENSMUSG00000063412 | Gm10131       | 0.290735117  | 0.007700701 | 0.077065542 |
| ENSMUSG00000025362 | Rps26         | 0.251410078  | 0.0077265   | 0.077209057 |
| ENSMUSG00000081642 | Gm13532       | 0.294270356  | 0.007734096 | 0.077222839 |
| ENSMUSG00000015149 | Sirt2         | -0.300413829 | 0.007747533 | 0.077294864 |
| ENSMUSG00000003283 | Hck           | -0.385109521 | 0.007775497 | 0.077397373 |

|                    |           |              |             |             |
|--------------------|-----------|--------------|-------------|-------------|
| ENSMUSG00000078676 | Casc3     | -0.33676118  | 0.007765287 | 0.077397373 |
| ENSMUSG00000079845 | Xlr4a     | -0.48687366  | 0.007776501 | 0.077397373 |
| ENSMUSG00000042787 | Exog      | -0.397587145 | 0.007786257 | 0.077432424 |
| ENSMUSG00000036672 | Cenpt     | -0.368396025 | 0.007804903 | 0.077555757 |
| ENSMUSG00000021477 | Ctsl      | 0.448390727  | 0.007844042 | 0.077778315 |
| ENSMUSG00000021504 | B4galt7   | -0.241285875 | 0.007837563 | 0.077778315 |
| ENSMUSG00000027259 | Adal      | -0.281059079 | 0.007852347 | 0.077778315 |
| ENSMUSG00000061371 | Zfp873    | -0.439133591 | 0.007851806 | 0.077778315 |
| ENSMUSG00000031266 | Gla       | 0.280454106  | 0.007907131 | 0.078258545 |
| ENSMUSG00000021102 | Glrx5     | 0.294882029  | 0.007954188 | 0.078536539 |
| ENSMUSG00000037278 | Tmem97    | 0.336914302  | 0.007949264 | 0.078536539 |
| ENSMUSG00000092572 | Serpinb10 | -0.504242114 | 0.007942517 | 0.078536539 |
| ENSMUSG00000026972 | Arrdc1    | -0.313136237 | 0.007969952 | 0.078629681 |
| ENSMUSG00000052488 | Cherp     | -0.52213249  | 0.007976798 | 0.07863477  |
| ENSMUSG00000000563 | Atp5f1    | 0.255923347  | 0.007999837 | 0.078736902 |
| ENSMUSG00000016940 | Kctd2     | -0.331717393 | 0.007994845 | 0.078736902 |
| ENSMUSG00000018672 | Copz2     | -0.446825057 | 0.008027427 | 0.078945898 |
| ENSMUSG00000109511 | Nup62     | -0.232431408 | 0.008053473 | 0.079139385 |
| ENSMUSG00000041781 | Cpsf2     | 0.286641919  | 0.008088398 | 0.079419758 |
| ENSMUSG00000032396 | Dis3l     | -0.396770631 | 0.008095658 | 0.079428254 |
| ENSMUSG00000029674 | Limk1     | -0.467962857 | 0.008128209 | 0.079539269 |
| ENSMUSG00000041084 | Ostc      | 0.261180965  | 0.008121517 | 0.079539269 |
| ENSMUSG00000041229 | Phf8      | -0.370504118 | 0.008126137 | 0.079539269 |
| ENSMUSG00000063543 | Gm5616    | 0.230410184  | 0.008132588 | 0.079539269 |
| ENSMUSG00000035342 | Lzts2     | -0.506306603 | 0.008139188 | 0.079541196 |
| ENSMUSG00000034947 | Tmem106a  | -0.486780366 | 0.008183518 | 0.079848766 |
| ENSMUSG00000079641 | Rpl39     | 0.326712974  | 0.008181696 | 0.079848766 |
| ENSMUSG00000047965 | Rpl9-ps7  | 0.294385873  | 0.008202425 | 0.079970424 |
| ENSMUSG00000079658 | Eloc      | 0.231621161  | 0.008234093 | 0.080173501 |
| ENSMUSG00000083282 | Ctsf      | -0.582871429 | 0.008236164 | 0.080173501 |
| ENSMUSG00000022148 | Fyb       | 0.332647894  | 0.008264233 | 0.080383739 |
| ENSMUSG00000029634 | Rnf6      | -0.407173808 | 0.008271825 | 0.080394626 |
| ENSMUSG00000029716 | Tfr2      | -0.405436963 | 0.008287373 | 0.080482768 |
| ENSMUSG00000038072 | Galnt11   | -0.3313747   | 0.008300502 | 0.080547291 |
| ENSMUSG00000017774 | Myo1c     | -0.37936836  | 0.008315664 | 0.080594405 |
| ENSMUSG00000060397 | Zfp128    | -0.490536572 | 0.008318334 | 0.080594405 |
| ENSMUSG00000024621 | Csf1r     | -0.429139997 | 0.008328605 | 0.080631019 |
| ENSMUSG00000026032 | Ndufb3    | 0.202400324  | 0.008342079 | 0.080698568 |
| ENSMUSG00000090553 | Snrpe     | 0.269162116  | 0.008351638 | 0.080728165 |
| ENSMUSG00000070327 | Rnf213    | 0.497452085  | 0.008399415 | 0.081126854 |
| ENSMUSG00000020514 | Mrpl22    | 0.257972078  | 0.008421249 | 0.08127454  |
| ENSMUSG00000023723 | Mrps23    | 0.272475741  | 0.008429661 | 0.081292561 |
| ENSMUSG00000079523 | Tmsb10    | -0.489496221 | 0.008464755 | 0.081567664 |

|                     |               |              |             |             |
|---------------------|---------------|--------------|-------------|-------------|
| ENSMUSG00000001983  | Taco1         | 0.349123078  | 0.008482812 | 0.081678296 |
| ENSMUSG000000031545 | Gpat4         | -0.232581348 | 0.008506953 | 0.081847303 |
| ENSMUSG000000038893 | Fam117a       | -0.364639481 | 0.00852299  | 0.081938124 |
| ENSMUSG00000006818  | Sod2          | 0.297402395  | 0.00853985  | 0.082036716 |
| ENSMUSG000000024174 | Pot1b         | -0.310831886 | 0.008560609 | 0.082172589 |
| ENSMUSG000000026260 | Ndufa10       | 0.251964693  | 0.008574927 | 0.082246465 |
| ENSMUSG000000030884 | Uqcrc2        | 0.250304883  | 0.008590723 | 0.082334387 |
| ENSMUSG000000104649 | Gm43712       | 0.368571414  | 0.008597748 | 0.082338186 |
| ENSMUSG000000020437 | Myo1g         | -0.416375213 | 0.008619873 | 0.082486475 |
| ENSMUSG000000021458 | 2010111I01Rik | 0.259172278  | 0.0086324   | 0.082503262 |
| ENSMUSG000000036639 | Nudt1         | 0.359759481  | 0.008634912 | 0.082503262 |
| ENSMUSG000000074358 | Ccdc61        | -0.333260953 | 0.008647926 | 0.082564091 |
| ENSMUSG000000015745 | Plekho1       | -0.494532672 | 0.008677276 | 0.082640464 |
| ENSMUSG000000030410 | Dmwd          | -0.211682392 | 0.008679021 | 0.082640464 |
| ENSMUSG000000043192 | Gm1840        | 0.1814055    | 0.008682538 | 0.082640464 |
| ENSMUSG000000078192 | Gm7290        | 0.217570754  | 0.008674448 | 0.082640464 |
| ENSMUSG000000014418 | Hps5          | -0.523587755 | 0.008692959 | 0.082676301 |
| ENSMUSG000000016477 | E2f3          | 0.420340827  | 0.008735604 | 0.082923182 |
| ENSMUSG000000020359 | Phykpl        | 0.341911682  | 0.008738946 | 0.082923182 |
| ENSMUSG000000029651 | Mtus2         | 0.571339524  | 0.008731893 | 0.082923182 |
| ENSMUSG000000043964 | Orai3         | -0.302879073 | 0.008773648 | 0.08314659  |
| ENSMUSG000000055943 | Emc7          | 0.296395451  | 0.008786776 | 0.08314659  |
| ENSMUSG000000058586 | Serhl         | 0.255006668  | 0.008789266 | 0.08314659  |
| ENSMUSG000000084319 | Tpt1-ps3      | 0.242325092  | 0.008776972 | 0.08314659  |
| ENSMUSG000000026495 | Efcab2        | 0.414703001  | 0.008832264 | 0.083489768 |
| ENSMUSG000000030677 | Kif22         | -0.312337276 | 0.008939667 | 0.084440765 |
| ENSMUSG000000028322 | Exosc3        | 0.261116726  | 0.00894717  | 0.084447417 |
| ENSMUSG000000003948 | Mmd           | 0.408721497  | 0.008976002 | 0.084655217 |
| ENSMUSG000000021111 | Papola        | 0.226142012  | 0.008991615 | 0.084738122 |
| ENSMUSG000000024952 | Rps6ka4       | -0.369700378 | 0.009008878 | 0.084836448 |
| ENSMUSG000000019969 | Psen1         | -0.24379226  | 0.009053776 | 0.085194656 |
| ENSMUSG000000073409 | H2-Q6         | -0.563972532 | 0.009076677 | 0.0853455   |
| ENSMUSG000000028730 | Cfap57        | 0.52300519   | 0.009139758 | 0.085873625 |
| ENSMUSG000000047264 | Zfp358        | -0.442055454 | 0.009155839 | 0.085959694 |
| ENSMUSG000000026737 | Pip4k2a       | -0.288327134 | 0.009185085 | 0.086169139 |
| ENSMUSG000000004667 | Polr2e        | 0.247547631  | 0.009206291 | 0.086302895 |
| ENSMUSG000000058291 | Zfp68         | -0.272251182 | 0.009319154 | 0.087295035 |
| ENSMUSG000000044791 | Setd2         | 0.474675341  | 0.009335752 | 0.087384609 |
| ENSMUSG000000064208 | Gm10145       | 0.430925228  | 0.00935544  | 0.087437112 |
| ENSMUSG000000109933 | Gm7600        | 0.102646208  | 0.009350202 | 0.087437112 |
| ENSMUSG000000025026 | Add3          | -0.301094152 | 0.009393201 | 0.087724019 |
| ENSMUSG000000017132 | Cyth1         | -0.354712196 | 0.009438239 | 0.087800817 |
| ENSMUSG000000029513 | Prkab1        | -0.321113491 | 0.009417634 | 0.087800817 |

|                    |          |              |             |             |
|--------------------|----------|--------------|-------------|-------------|
| ENSMUSG00000030844 | Rgs10    | -0.36663701  | 0.00942914  | 0.087800817 |
| ENSMUSG00000030983 | Bccip    | 0.264044275  | 0.009443836 | 0.087800817 |
| ENSMUSG00000037622 | Wdte1    | -0.30773181  | 0.009432034 | 0.087800817 |
| ENSMUSG00000054191 | Klf1     | -0.514565298 | 0.009421788 | 0.087800817 |
| ENSMUSG00000036257 | Pnpla8   | -0.363865179 | 0.009475297 | 0.088027423 |
| ENSMUSG00000027509 | Rae1     | 0.226942097  | 0.00949658  | 0.088159208 |
| ENSMUSG00000040711 | Sh3pxd2b | -0.510120383 | 0.0095228   | 0.088204843 |
| ENSMUSG00000047879 | Usp14    | 0.228345511  | 0.009519024 | 0.088204843 |
| ENSMUSG00000050312 | Nsun3    | 0.322638335  | 0.009520917 | 0.088204843 |
| ENSMUSG00000038150 | Ormdl3   | -0.325332049 | 0.009532104 | 0.088225231 |
| ENSMUSG00000047721 | Bola2    | 0.276716964  | 0.009543314 | 0.088263218 |
| ENSMUSG00000019988 | Nedd1    | -0.266746272 | 0.009588401 | 0.088614229 |
| ENSMUSG00000030089 | Slc41a3  | -0.472296019 | 0.009617859 | 0.088771762 |
| ENSMUSG00000035529 | Prdm4    | -0.446065849 | 0.00961974  | 0.088771762 |
| ENSMUSG00000057530 | Ece1     | -0.053953138 | 0.009638154 | 0.088875659 |
| ENSMUSG00000022325 | Pop1     | 0.446018742  | 0.009651111 | 0.088910063 |
| ENSMUSG00000024170 | Telo2    | -0.2679807   | 0.009656201 | 0.088910063 |
| ENSMUSG00000029161 | Cgref1   | -0.48935769  | 0.009717433 | 0.089353076 |
| ENSMUSG00000032959 | Pebp1    | 0.267191304  | 0.009718703 | 0.089353076 |
| ENSMUSG00000028599 | Tnfrsf1b | -0.530071709 | 0.009738145 | 0.08940254  |
| ENSMUSG00000031506 | Ptpn7    | -0.293703089 | 0.009743478 | 0.08940254  |
| ENSMUSG00000038780 | Smurf1   | -0.480226096 | 0.009745676 | 0.08940254  |
| ENSMUSG00000002109 | Ddb2     | -0.33672272  | 0.009799675 | 0.089831555 |
| ENSMUSG00000034032 | Rpap1    | -0.402960304 | 0.009808798 | 0.089848878 |
| ENSMUSG00000001248 | Gramd1a  | -0.259483399 | 0.009830332 | 0.089979772 |
| ENSMUSG00000025737 | Wdr24    | -0.46248669  | 0.00984106  | 0.089993345 |
| ENSMUSG00000083439 | Gm14491  | 0.304804686  | 0.009846305 | 0.089993345 |
| ENSMUSG00000031162 | Gata1    | -0.490015758 | 0.009874713 | 0.090186626 |
| ENSMUSG00000032399 | Rpl4     | 0.258802626  | 0.009891996 | 0.090278096 |
| ENSMUSG00000024570 | Rbfa     | 0.214770726  | 0.009921443 | 0.090413972 |
| ENSMUSG00000026409 | Pfkfb2   | -0.230100568 | 0.009917944 | 0.090413972 |
| ENSMUSG00000038357 | Camp     | -0.470844707 | 0.009963436 | 0.090597247 |
| ENSMUSG00000045757 | Zfp764   | -0.395086443 | 0.009956757 | 0.090597247 |
| ENSMUSG00000082516 | Gm13342  | -0.468223531 | 0.009960247 | 0.090597247 |
| ENSMUSG00000002957 | Ap2a2    | -0.295614882 | 0.0100084   | 0.090890889 |
| ENSMUSG00000035150 | Eif2s3x  | 0.441000109  | 0.010010364 | 0.090890889 |
| ENSMUSG00000020224 | Llph     | 0.238887891  | 0.010025981 | 0.090966183 |
| ENSMUSG00000025138 | Sirt7    | -0.241334691 | 0.010092205 | 0.091500204 |
| ENSMUSG00000021483 | Cdk20    | -0.470316985 | 0.01012332  | 0.091715356 |
| ENSMUSG00000096719 | Mrgpra2b | 0.349635148  | 0.010202803 | 0.092368083 |
| ENSMUSG00000038593 | Tctn1    | -0.413584443 | 0.010217962 | 0.092394873 |
| ENSMUSG00000039000 | Ube3c    | -0.328676499 | 0.010224671 | 0.092394873 |
| ENSMUSG00000115593 | Gm4824   | 0.530076519  | 0.010228078 | 0.092394873 |

|                    |               |              |             |             |
|--------------------|---------------|--------------|-------------|-------------|
| ENSMUSG0000000581  | C1d           | 0.194821625  | 0.010241095 | 0.092445234 |
| ENSMUSG00000018415 | Gid4          | -0.316296637 | 0.010256867 | 0.092458889 |
| ENSMUSG00000027285 | Haus2         | 0.245692856  | 0.010257495 | 0.092458889 |
| ENSMUSG00000023015 | Racgap1       | -0.363104938 | 0.0103324   | 0.092730301 |
| ENSMUSG00000024006 | Stk38         | -0.266810106 | 0.010302579 | 0.092730301 |
| ENSMUSG00000028864 | Hgf           | -0.439681499 | 0.010327268 | 0.092730301 |
| ENSMUSG00000028998 | Tomm7         | 0.208228715  | 0.010305348 | 0.092730301 |
| ENSMUSG00000029034 | Ints11        | -0.253838057 | 0.010320323 | 0.092730301 |
| ENSMUSG00000080870 | Gm14111       | 0.169619091  | 0.010314573 | 0.092730301 |
| ENSMUSG00000022551 | Cyc1          | 0.291713616  | 0.010358926 | 0.092901244 |
| ENSMUSG00000031843 | Mphosph6      | 0.278563582  | 0.010376667 | 0.092993203 |
| ENSMUSG0000002948  | Map2k7        | -0.396881814 | 0.010400523 | 0.093139792 |
| ENSMUSG00000025731 | Mettl26       | 0.317554     | 0.010415208 | 0.093204103 |
| ENSMUSG00000079941 | Gm11273       | 0.227294751  | 0.010431752 | 0.093284945 |
| ENSMUSG00000033318 | Gstt2         | 0.219076431  | 0.010456831 | 0.093441938 |
| ENSMUSG00000022855 | Senp2         | -0.501447581 | 0.01054169  | 0.093472357 |
| ENSMUSG00000023505 | Cdca3         | 0.220611071  | 0.010543396 | 0.093472357 |
| ENSMUSG00000024940 | Ltbp3         | -0.244076151 | 0.01050928  | 0.093472357 |
| ENSMUSG00000025232 | Hexa          | -0.213847931 | 0.010530723 | 0.093472357 |
| ENSMUSG00000025437 | Usp33         | -0.342986499 | 0.010523312 | 0.093472357 |
| ENSMUSG00000026311 | Asb1          | 0.497753578  | 0.010559567 | 0.093472357 |
| ENSMUSG00000033439 | Trmt13        | -0.290305967 | 0.01056559  | 0.093472357 |
| ENSMUSG00000034361 | Cpne2         | -0.236150029 | 0.010508886 | 0.093472357 |
| ENSMUSG00000034602 | Mon2          | 0.507823347  | 0.010497142 | 0.093472357 |
| ENSMUSG00000036197 | Gxylt1        | 0.343522674  | 0.010493334 | 0.093472357 |
| ENSMUSG00000047719 | Ubiad1        | -0.319822226 | 0.010564024 | 0.093472357 |
| ENSMUSG00000068921 | Dap3          | 0.240452343  | 0.010470528 | 0.093472357 |
| ENSMUSG00000079311 | Gm3222        | 0.113880566  | 0.010477433 | 0.093472357 |
| ENSMUSG00000113151 | Gm48690       | 0.358196978  | 0.010548663 | 0.093472357 |
| ENSMUSG00000010392 | Gosr1         | 0.309577223  | 0.010615146 | 0.093591502 |
| ENSMUSG00000023345 | Poc1a         | 0.26476951   | 0.010613674 | 0.093591502 |
| ENSMUSG00000027673 | Ndufb5        | 0.26823672   | 0.010587715 | 0.093591502 |
| ENSMUSG00000037795 | N4bp2         | 0.443554032  | 0.010596778 | 0.093591502 |
| ENSMUSG00000098176 | Ccdc166       | -0.339862252 | 0.010616732 | 0.093591502 |
| ENSMUSG00000038644 | Pold1         | -0.351518395 | 0.01063008  | 0.093642716 |
| ENSMUSG00000098019 | Gm2546        | 0.119421849  | 0.010649293 | 0.093745474 |
| ENSMUSG00000039662 | Icmt          | 0.506980262  | 0.010689062 | 0.094028923 |
| ENSMUSG00000018102 | Hist1h2bc     | -0.345291537 | 0.010729924 | 0.094268462 |
| ENSMUSG00000024081 | Cebpz         | 0.359282746  | 0.010731471 | 0.094268462 |
| ENSMUSG00000036046 | 5031439G07Rik | -0.47962291  | 0.010742924 | 0.094302372 |
| ENSMUSG00000031897 | Psmb10        | 0.199438451  | 0.01076631  | 0.094440913 |
| ENSMUSG00000022216 | Psme1         | 0.18535933   | 0.010787684 | 0.094561622 |
| ENSMUSG00000067925 | Rtl8a         | -0.416672702 | 0.010807671 | 0.094670012 |

|                    |           |              |             |             |
|--------------------|-----------|--------------|-------------|-------------|
| ENSMUSG00000068205 | MacroD2   | -0.333199971 | 0.010842272 | 0.094906176 |
| ENSMUSG00000040078 | Ptges3-ps | 0.309355881  | 0.010872178 | 0.095100928 |
| ENSMUSG00000020166 | Cnot2     | -0.296381843 | 0.010885314 | 0.095124004 |
| ENSMUSG00000030839 | Sergef    | 0.283546308  | 0.010890586 | 0.095124004 |
| ENSMUSG00000060126 | Tpt1      | 0.275054511  | 0.010897791 | 0.095124004 |
| ENSMUSG00000058809 | Hspd1-ps3 | 0.210805812  | 0.010949712 | 0.095510095 |
| ENSMUSG00000034035 | Ccdc17    | -0.457142512 | 0.010990296 | 0.095796817 |
| ENSMUSG00000045409 | Trim39    | -0.333335009 | 0.011017204 | 0.09596402  |
| ENSMUSG00000032323 | Cyp11a1   | -0.472532599 | 0.011087227 | 0.096506267 |
| ENSMUSG00000022617 | Chkb      | -0.28279313  | 0.011096739 | 0.096521428 |
| ENSMUSG00000029505 | Ep400     | -0.293078408 | 0.011117538 | 0.096599051 |
| ENSMUSG00000064147 | Rab44     | -0.286788595 | 0.011121218 | 0.096599051 |
| ENSMUSG00000021807 | Rtraf     | 0.30252113   | 0.011145268 | 0.096672744 |
| ENSMUSG00000074797 | ltpa      | 0.237962677  | 0.011140534 | 0.096672744 |
| ENSMUSG00000059326 | Csf2ra    | -0.344309481 | 0.01115927  | 0.096726649 |
| ENSMUSG00000020115 | Tbk1      | -0.216316085 | 0.011182356 | 0.096800899 |
| ENSMUSG00000027947 | Il6ra     | -0.489361494 | 0.011183422 | 0.096800899 |
| ENSMUSG00000034413 | Neur1b    | -0.215088292 | 0.011212417 | 0.096984282 |
| ENSMUSG00000036305 | Rpl39-ps  | 0.479932496  | 0.011234686 | 0.097109275 |
| ENSMUSG00000001674 | Ddx18     | 0.340940989  | 0.011258455 | 0.097247056 |
| ENSMUSG00000024201 | Kdm4b     | -0.483734897 | 0.011337056 | 0.097789979 |
| ENSMUSG00000080076 | Hist1h2aj | 0.221176495  | 0.011333698 | 0.097789979 |
| ENSMUSG00000050953 | Gja1      | -0.277311117 | 0.011359129 | 0.09791238  |
| ENSMUSG00000024222 | Fkbp5     | -0.306650293 | 0.011391021 | 0.098119189 |
| ENSMUSG00000053334 | Ficd      | -0.399132813 | 0.011418701 | 0.098289455 |
| ENSMUSG00000040964 | Arhgef10l | -0.476378222 | 0.011430271 | 0.098320909 |
| ENSMUSG00000022283 | Pabpc1    | 0.394359916  | 0.011460445 | 0.098400175 |
| ENSMUSG00000022971 | Ifnar2    | -0.256210972 | 0.011460039 | 0.098400175 |
| ENSMUSG00000041506 | Rrp9      | 0.23032403   | 0.011467735 | 0.098400175 |
| ENSMUSG00000061360 | Phf5a     | 0.246770954  | 0.011471174 | 0.098400175 |
| ENSMUSG00000031903 | Pla2g15   | -0.391473387 | 0.011493658 | 0.098514436 |
| ENSMUSG00000040562 | Gstm2     | 0.445465164  | 0.011500357 | 0.098514436 |
| ENSMUSG00000074506 | Gm10705   | 0.287661372  | 0.011548639 | 0.098859848 |
| ENSMUSG00000005846 | Rsl1d1    | 0.234195023  | 0.011598103 | 0.099146618 |
| ENSMUSG00000028140 | Mrpl9     | 0.303395583  | 0.011593407 | 0.099146618 |
| ENSMUSG00000052909 | Gm9894    | -0.333754568 | 0.011617274 | 0.099242201 |
| ENSMUSG00000023262 | Acy1      | 0.279902676  | 0.011641549 | 0.099381223 |
| ENSMUSG00000031954 | Cfdp1     | 0.225145633  | 0.011686976 | 0.0997005   |
| ENSMUSG00000021591 | Glrx      | 0.21271703   | 0.011696969 | 0.099717261 |
| ENSMUSG00000071647 | Eml3      | -0.465152496 | 0.011715339 | 0.099765566 |
| ENSMUSG00000082193 | Rpl5-ps1  | 0.165172645  | 0.011718699 | 0.099765566 |
| ENSMUSG00000022792 | Yars2     | 0.28621375   | 0.011740941 | 0.09978833  |
| ENSMUSG00000046417 | Lrrc75a   | -0.458131536 | 0.011744917 | 0.09978833  |

|                    |               |              |             |             |
|--------------------|---------------|--------------|-------------|-------------|
| ENSMUSG00000054792 | Klhl18        | -0.436204637 | 0.011745474 | 0.09978833  |
| ENSMUSG00000041720 | Pi4ka         | 0.44969804   | 0.011771496 | 0.09994105  |
| ENSMUSG00000098123 | Gm4518        | 0.085805352  | 0.011787052 | 0.100004762 |
| ENSMUSG00000001025 | S100a6        | -0.420594475 | 0.011840241 | 0.100387462 |
| ENSMUSG00000062202 | Btbd9         | -0.227334124 | 0.011869987 | 0.100571015 |
| ENSMUSG00000033488 | Cryz12        | -0.30944669  | 0.011884797 | 0.100627857 |
| ENSMUSG00000018500 | Adora2b       | -0.418095763 | 0.011917838 | 0.100770225 |
| ENSMUSG00000027082 | Tfpi          | 0.285329805  | 0.011914776 | 0.100770225 |
| ENSMUSG00000062585 | Cnr2          | -0.387557883 | 0.01192713  | 0.10078019  |
| ENSMUSG00000004677 | Myo9b         | -0.463255171 | 0.012058507 | 0.101617429 |
| ENSMUSG00000026087 | Mrpl30        | 0.246085302  | 0.01205894  | 0.101617429 |
| ENSMUSG00000064281 | Rpl19-ps1     | 0.286192446  | 0.012043042 | 0.101617429 |
| ENSMUSG00000067869 | Tcea1-ps1     | 0.317447594  | 0.012043767 | 0.101617429 |
| ENSMUSG00000033781 | Asb13         | -0.37333869  | 0.01206836  | 0.101627864 |
| ENSMUSG00000026809 | Spaca9        | -0.38374088  | 0.012087676 | 0.101721558 |
| ENSMUSG00000060301 | 2610008E11Rik | -0.456422065 | 0.012101829 | 0.10177171  |
| ENSMUSG00000057762 | Gm6169        | -0.458015572 | 0.012115276 | 0.101815863 |
| ENSMUSG00000000290 | Itgb2         | -0.316026102 | 0.012126201 | 0.101838773 |
| ENSMUSG00000067995 | Gtf2f2        | 0.249458002  | 0.012148576 | 0.101957748 |
| ENSMUSG00000033039 | Micall1       | -0.442105256 | 0.012159368 | 0.101979413 |
| ENSMUSG00000025580 | Eif4a3        | 0.238293225  | 0.01220995  | 0.102152728 |
| ENSMUSG00000037243 | Zfp692        | -0.273327553 | 0.012213568 | 0.102152728 |
| ENSMUSG00000038473 | Nos1ap        | -0.461472082 | 0.012221154 | 0.102152728 |
| ENSMUSG00000040325 | Dcaf1         | 0.387729046  | 0.012213163 | 0.102152728 |
| ENSMUSG00000079435 | Rpl36a        | 0.265761393  | 0.012191042 | 0.102152728 |
| ENSMUSG00000059900 | Tmem40        | 0.379070164  | 0.012254242 | 0.102360417 |
| ENSMUSG00000003808 | Farsa         | 0.260303399  | 0.012273966 | 0.102387465 |
| ENSMUSG00000037072 | Selenof       | 0.187465791  | 0.012273499 | 0.102387465 |
| ENSMUSG00000050310 | Rictor        | -0.327204623 | 0.012316537 | 0.102673625 |
| ENSMUSG00000004994 | Ccdc130       | -0.322067877 | 0.012362557 | 0.102748337 |
| ENSMUSG00000037722 | Gnpnat1       | 0.210322687  | 0.012340005 | 0.102748337 |
| ENSMUSG00000050106 | Tmc8          | -0.456999189 | 0.01237361  | 0.102748337 |
| ENSMUSG00000072704 | Smim10l1      | 0.261903589  | 0.012375132 | 0.102748337 |
| ENSMUSG00000093671 | Gm20656       | 0.402616094  | 0.01237337  | 0.102748337 |
| ENSMUSG00000113999 | Gm47681       | 0.297064268  | 0.012358567 | 0.102748337 |
| ENSMUSG00000072381 | Gm10355       | 0.32321606   | 0.012393566 | 0.102832652 |
| ENSMUSG00000032965 | lft57         | 0.321828646  | 0.01241306  | 0.102925647 |
| ENSMUSG00000030805 | Stx4a         | -0.265178558 | 0.012441525 | 0.103092847 |
| ENSMUSG00000031422 | Morf4l2       | 0.283723271  | 0.012481409 | 0.103354388 |
| ENSMUSG00000036091 | Hyal3         | -0.451160266 | 0.012495432 | 0.103401572 |
| ENSMUSG00000002379 | Ndufa11       | 0.236902526  | 0.012504626 | 0.103408763 |
| ENSMUSG00000020097 | Sgpl1         | -0.286829715 | 0.012543256 | 0.103659202 |
| ENSMUSG00000024566 | Atp9b         | -0.396908552 | 0.012584177 | 0.103875356 |

|                    |            |              |             |             |
|--------------------|------------|--------------|-------------|-------------|
| ENSMUSG00000058799 | Nap1l1     | 0.278357306  | 0.012586137 | 0.103875356 |
| ENSMUSG00000055707 | Klhl26     | -0.382543911 | 0.012644545 | 0.104288106 |
| ENSMUSG00000027189 | Trim44     | -0.321853642 | 0.012679707 | 0.104468361 |
| ENSMUSG00000048154 | Kmt2d      | -0.376133496 | 0.012683221 | 0.104468361 |
| ENSMUSG00000024242 | Map4k3     | -0.21428713  | 0.012778307 | 0.105094667 |
| ENSMUSG00000027746 | Ufm1       | 0.217565961  | 0.012772283 | 0.105094667 |
| ENSMUSG00000031065 | Cdk16      | -0.292326055 | 0.012793103 | 0.105094667 |
| ENSMUSG00000117248 | AC122481.2 | 0.306565434  | 0.012789244 | 0.105094667 |
| ENSMUSG00000034308 | Sdr42e1    | -0.409802292 | 0.012826454 | 0.105299    |
| ENSMUSG00000052676 | Zmat1      | -0.365187605 | 0.012840123 | 0.105341592 |
| ENSMUSG00000094777 | Hist1h2ap  | 0.246071179  | 0.012872256 | 0.105535507 |
| ENSMUSG00000041775 | Mapk1ip1   | -0.318893839 | 0.012937039 | 0.105996674 |
| ENSMUSG00000021368 | Tbc1d7     | 0.248754112  | 0.012948815 | 0.106023227 |
| ENSMUSG00000035828 | Pim3       | -0.300755462 | 0.012965716 | 0.106030974 |
| ENSMUSG00000070953 | Rabepk     | 0.259354029  | 0.012966834 | 0.106030974 |
| ENSMUSG00000025701 | Alox5      | -0.421137955 | 0.012976734 | 0.106042113 |
| ENSMUSG00000003198 | Zfp959     | -0.315336704 | 0.013008117 | 0.106113028 |
| ENSMUSG00000027810 | Eif2a      | 0.281874656  | 0.013014583 | 0.106113028 |
| ENSMUSG00000042492 | Tbc1d10b   | -0.443998115 | 0.013000217 | 0.106113028 |
| ENSMUSG00000045160 | Bola3      | 0.248708688  | 0.013019584 | 0.106113028 |
| ENSMUSG00000005069 | Pex5       | -0.306704228 | 0.013047092 | 0.106267492 |
| ENSMUSG00000025264 | Tsr2       | 0.23293755   | 0.013064607 | 0.106340423 |
| ENSMUSG00000033316 | Galnt9     | -0.131087877 | 0.013090917 | 0.106484796 |
| ENSMUSG00000022890 | Atp5j      | 0.24165389   | 0.013117778 | 0.106633452 |
| ENSMUSG00000010097 | Nxf1       | -0.254710575 | 0.013136826 | 0.106718456 |
| ENSMUSG00000024594 | Prrc1      | 0.229727467  | 0.013164126 | 0.106848071 |
| ENSMUSG00000107383 | Gm4366     | 0.395609632  | 0.013169986 | 0.106848071 |
| ENSMUSG00000025558 | Dock9      | 0.389407627  | 0.013187668 | 0.106921688 |
| ENSMUSG00000024800 | Rpp30      | 0.239717735  | 0.013196926 | 0.106926949 |
| ENSMUSG00000028643 | Svbp       | 0.288812416  | 0.013206551 | 0.106935184 |
| ENSMUSG00000036990 | Otud4      | 0.431356545  | 0.013217812 | 0.106956641 |
| ENSMUSG00000056204 | Pgpep1     | -0.360435436 | 0.013236069 | 0.107034641 |
| ENSMUSG00000062554 | Gm12751    | 0.332219487  | 0.013250433 | 0.107081086 |
| ENSMUSG00000061414 | Cracr2a    | -0.367741648 | 0.013302569 | 0.107432512 |
| ENSMUSG00000039159 | Ube2h      | 0.379381805  | 0.013327407 | 0.107563173 |
| ENSMUSG00000066724 | Gm10175    | 0.346855333  | 0.013352802 | 0.107698152 |
| ENSMUSG00000023249 | Parp3      | -0.392279032 | 0.013366502 | 0.107738691 |
| ENSMUSG00000041658 | Rragb      | -0.361550708 | 0.013397941 | 0.107922066 |
| ENSMUSG00000007034 | Slc44a4    | 0.433171859  | 0.013441313 | 0.108131188 |
| ENSMUSG00000041483 | Zfp281     | -0.273744141 | 0.013437588 | 0.108131188 |
| ENSMUSG00000034842 | Art3       | 0.09240541   | 0.013458999 | 0.108192604 |
| ENSMUSG00000040809 | Chil3      | 0.421081094  | 0.013492431 | 0.108192604 |
| ENSMUSG00000043510 | Hscb       | 0.241315214  | 0.013488679 | 0.108192604 |

|                    |           |              |             |             |
|--------------------|-----------|--------------|-------------|-------------|
| ENSMUSG00000052142 | Rasal3    | -0.386849837 | 0.0134925   | 0.108192604 |
| ENSMUSG00000081757 | Gm13798   | 0.409371124  | 0.013488891 | 0.108192604 |
| ENSMUSG00000028318 | Polr1e    | 0.27958364   | 0.013510838 | 0.108269753 |
| ENSMUSG00000060550 | H2-Q7     | -0.435079383 | 0.013534353 | 0.108318424 |
| ENSMUSG00000074634 | Tmem267   | 0.438024761  | 0.013531261 | 0.108318424 |
| ENSMUSG00000030246 | Ldhb      | -0.370387481 | 0.013556528 | 0.108426034 |
| ENSMUSG00000002550 | Uck1      | -0.291260571 | 0.013592145 | 0.108611717 |
| ENSMUSG00000022620 | Arsa      | -0.363566611 | 0.013605976 | 0.108611717 |
| ENSMUSG00000067916 | Zfp991    | -0.401827825 | 0.013601613 | 0.108611717 |
| ENSMUSG00000081176 | H3f3a-ps2 | -0.153386492 | 0.013665036 | 0.109013109 |
| ENSMUSG00000016308 | Ube2a     | 0.293604131  | 0.013687901 | 0.109125427 |
| ENSMUSG00000020153 | Ndufs7    | 0.200169694  | 0.013727565 | 0.109265533 |
| ENSMUSG00000029440 | Psmid9    | 0.253152576  | 0.013731865 | 0.109265533 |
| ENSMUSG00000044199 | S1pr4     | -0.424989237 | 0.013730329 | 0.109265533 |
| ENSMUSG00000034957 | Cebpa     | -0.419578597 | 0.013761068 | 0.109407407 |
| ENSMUSG00000056904 | Gm5620    | 0.248506702  | 0.013767312 | 0.109407407 |
| ENSMUSG00000003970 | Rpl8      | 0.275568111  | 0.013792635 | 0.109538571 |
| ENSMUSG00000001157 | Gmcl1     | -0.227927452 | 0.013835213 | 0.109806506 |
| ENSMUSG00000000399 | Ndufa9    | 0.242313806  | 0.01386742  | 0.109991843 |
| ENSMUSG00000020346 | Mgat1     | -0.404292712 | 0.013920617 | 0.110202664 |
| ENSMUSG00000034994 | Eef2      | 0.352062975  | 0.013913284 | 0.110202664 |
| ENSMUSG00000058745 | Gm9174    | 0.253694922  | 0.013917201 | 0.110202664 |
| ENSMUSG00000045636 | Mtus1     | -0.255301569 | 0.013956226 | 0.110414192 |
| ENSMUSG00000047921 | Trappc9   | -0.334369696 | 0.013981812 | 0.110546205 |
| ENSMUSG00000001419 | Mef2d     | -0.371594456 | 0.014061379 | 0.110596857 |
| ENSMUSG00000002668 | Dennd1c   | -0.402297225 | 0.014009622 | 0.110596857 |
| ENSMUSG00000010453 | Kansl3    | -0.310915726 | 0.014033794 | 0.110596857 |
| ENSMUSG00000021131 | Erh       | 0.277491728  | 0.014046019 | 0.110596857 |
| ENSMUSG00000027775 | Mfsd1     | 0.222880611  | 0.014047576 | 0.110596857 |
| ENSMUSG00000032763 | Ilvbl     | -0.30142089  | 0.014053844 | 0.110596857 |
| ENSMUSG00000039270 | Megf9     | -0.364743162 | 0.014047502 | 0.110596857 |
| ENSMUSG00000041538 | H2-Ob     | -0.427908604 | 0.01406566  | 0.110596857 |
| ENSMUSG00000041966 | Dcaf17    | -0.246173603 | 0.014068355 | 0.110596857 |
| ENSMUSG00000054065 | Pkp3      | -0.371667809 | 0.014077446 | 0.110598332 |
| ENSMUSG00000035637 | Grhpr     | 0.340969442  | 0.014096298 | 0.110676435 |
| ENSMUSG00000023118 | Sympk     | -0.418442365 | 0.014138435 | 0.110789601 |
| ENSMUSG00000025980 | Hspd1     | 0.340042943  | 0.014173148 | 0.110789601 |
| ENSMUSG00000026436 | Elk4      | 0.411410474  | 0.014166653 | 0.110789601 |
| ENSMUSG00000028807 | Zbtb8a    | -0.317596141 | 0.014168015 | 0.110789601 |
| ENSMUSG00000030045 | Mrpl19    | 0.248958     | 0.014125608 | 0.110789601 |
| ENSMUSG00000036966 | Spryd3    | -0.383445718 | 0.014169546 | 0.110789601 |
| ENSMUSG00000037661 | Gpr160    | -0.247059145 | 0.014131388 | 0.110789601 |
| ENSMUSG00000084350 | Znf41-ps  | -0.387112454 | 0.014288407 | 0.111620319 |

|                    |          |              |             |             |
|--------------------|----------|--------------|-------------|-------------|
| ENSMUSG00000112844 | Gm47036  | 0.179150294  | 0.014321659 | 0.111809762 |
| ENSMUSG00000046079 | Lrrc8d   | -0.396824384 | 0.014357404 | 0.112018414 |
| ENSMUSG00000040415 | Dtx3     | -0.407948516 | 0.014371157 | 0.112055333 |
| ENSMUSG00000026584 | Scyl3    | -0.273023432 | 0.01440791  | 0.112271421 |
| ENSMUSG00000016256 | Ctsz     | 0.226166785  | 0.014424502 | 0.112330246 |
| ENSMUSG00000022300 | Dcaf13   | 0.255635835  | 0.014528638 | 0.112683813 |
| ENSMUSG00000024906 | Mus81    | -0.280627769 | 0.014523015 | 0.112683813 |
| ENSMUSG00000025134 | Alyref   | 0.244616763  | 0.014542481 | 0.112683813 |
| ENSMUSG00000028982 | Slc25a33 | 0.329631758  | 0.014500639 | 0.112683813 |
| ENSMUSG00000032239 | Rp9      | 0.270043761  | 0.014533892 | 0.112683813 |
| ENSMUSG00000033669 | Zfp7     | -0.286442227 | 0.01451735  | 0.112683813 |
| ENSMUSG00000034445 | Cyb561a3 | -0.322794787 | 0.014535186 | 0.112683813 |
| ENSMUSG00000070056 | Mfhas1   | -0.179586575 | 0.014482181 | 0.112683813 |
| ENSMUSG00000030822 | Prr14    | -0.303635878 | 0.014565116 | 0.112788843 |
| ENSMUSG00000000579 | Dynlt1c  | -0.371902794 | 0.014577473 | 0.112812517 |
| ENSMUSG00000083087 | Gm11249  | 0.177559319  | 0.014586338 | 0.112812517 |
| ENSMUSG00000041939 | Mvk      | 0.370556337  | 0.014614263 | 0.112958161 |
| ENSMUSG00000037321 | Tap1     | -0.313885979 | 0.014698338 | 0.113522216 |
| ENSMUSG00000038212 | Mfsd14b  | -0.270527145 | 0.014705518 | 0.113522216 |
| ENSMUSG00000027429 | Sec23b   | -0.302234725 | 0.014768289 | 0.113794615 |
| ENSMUSG00000036698 | Ago2     | -0.342526346 | 0.014764089 | 0.113794615 |
| ENSMUSG00000041695 | Kcnj2    | 0.142039538  | 0.014750482 | 0.113794615 |
| ENSMUSG00000022120 | Rnf219   | 0.301776437  | 0.014807619 | 0.114026132 |
| ENSMUSG00000049562 | Ap5b1    | -0.324008118 | 0.014816696 | 0.114026132 |
| ENSMUSG00000008682 | Rpl10    | 0.260334111  | 0.014956703 | 0.114606546 |
| ENSMUSG00000027384 | Ndufaf5  | 0.300839044  | 0.014924988 | 0.114606546 |
| ENSMUSG00000031458 | Coprs    | 0.267708845  | 0.014933119 | 0.114606546 |
| ENSMUSG00000039067 | Psmc7    | 0.24671499   | 0.014949369 | 0.114606546 |
| ENSMUSG00000039414 | Heatr5b  | 0.405135892  | 0.01490651  | 0.114606546 |
| ENSMUSG00000041879 | lpo9     | -0.40832645  | 0.014943032 | 0.114606546 |
| ENSMUSG00000074800 | Gm4149   | 0.221079751  | 0.014931517 | 0.114606546 |
| ENSMUSG00000021963 | Sap18    | 0.235991413  | 0.014996745 | 0.114842524 |
| ENSMUSG00000065990 | Aurkaip1 | 0.248164419  | 0.015017192 | 0.11491172  |
| ENSMUSG00000083708 | Gm13123  | 0.095972498  | 0.015024284 | 0.11491172  |
| ENSMUSG00000032691 | Nlrp3    | -0.155051528 | 0.01506689  | 0.115166673 |
| ENSMUSG00000008035 | Mid1ip1  | -0.282651361 | 0.015184556 | 0.115994691 |
| ENSMUSG00000040929 | Rfx3     | -0.09045605  | 0.015232493 | 0.116289367 |
| ENSMUSG00000028964 | Park7    | 0.25599949   | 0.015256503 | 0.116401122 |
| ENSMUSG00000051224 | Tceanc   | 0.334552267  | 0.015300731 | 0.116595322 |
| ENSMUSG00000059005 | Hnrnpa3  | 0.366527449  | 0.015292538 | 0.116595322 |
| ENSMUSG00000042292 | Mrtfa    | -0.3689304   | 0.01531374  | 0.116622908 |
| ENSMUSG00000021831 | Ero1l    | 0.277230692  | 0.015342746 | 0.116772214 |
| ENSMUSG00000004552 | Ctse     | -0.39765024  | 0.01537952  | 0.116921682 |

|                    |            |              |             |             |
|--------------------|------------|--------------|-------------|-------------|
| ENSMUSG00000034758 | Tle6       | -0.331173177 | 0.015381212 | 0.116921682 |
| ENSMUSG00000033728 | Lrrc14     | -0.312900513 | 0.015402445 | 0.117011482 |
| ENSMUSG00000041439 | Mfsd6      | -0.401015595 | 0.015422864 | 0.117023452 |
| ENSMUSG00000073910 | Mob3b      | -0.329428763 | 0.015415411 | 0.117023452 |
| ENSMUSG00000071708 | Sms        | 0.349300283  | 0.015451697 | 0.11717065  |
| ENSMUSG00000021271 | Zfp839     | -0.299334961 | 0.015510076 | 0.117501328 |
| ENSMUSG00000034341 | Wbp2       | -0.245865349 | 0.015514224 | 0.117501328 |
| ENSMUSG00000060904 | Arl1       | 0.230270375  | 0.015539802 | 0.117623324 |
| ENSMUSG00000001707 | Eef1e1     | 0.244309101  | 0.015577624 | 0.117766075 |
| ENSMUSG00000092186 | Gm5967     | 0.214724493  | 0.015568595 | 0.117766075 |
| ENSMUSG00000023393 | Slc17a9    | -0.309932937 | 0.015605567 | 0.117905563 |
| ENSMUSG00000024446 | Rpp21      | 0.210763325  | 0.015648856 | 0.117969264 |
| ENSMUSG00000024697 | Gna14      | -0.195447225 | 0.015654771 | 0.117969264 |
| ENSMUSG00000030051 | Aplf       | -0.255720271 | 0.015651009 | 0.117969264 |
| ENSMUSG00000035840 | Lysmd3     | -0.371993333 | 0.015639959 | 0.117969264 |
| ENSMUSG00000042289 | Hsd3b7     | -0.339646366 | 0.015661486 | 0.117969264 |
| ENSMUSG00000043051 | Disc1      | -0.390616795 | 0.015699151 | 0.118181306 |
| ENSMUSG00000024844 | Banf1      | 0.216233813  | 0.015770476 | 0.118419441 |
| ENSMUSG00000028693 | Nasp       | 0.328641274  | 0.015778454 | 0.118419441 |
| ENSMUSG00000032353 | Tmed3      | 0.184699687  | 0.015746753 | 0.118419441 |
| ENSMUSG00000039693 | Msantd3    | 0.281072666  | 0.015754223 | 0.118419441 |
| ENSMUSG00000058443 | Rpl10-ps3  | 0.329305405  | 0.015776495 | 0.118419441 |
| ENSMUSG00000052609 | Plekhg3    | -0.39476518  | 0.01581132  | 0.118594451 |
| ENSMUSG00000054263 | Lifr       | 0.095001701  | 0.015841814 | 0.118751464 |
| ENSMUSG00000028138 | Adh5       | 0.191620709  | 0.015892698 | 0.11906104  |
| ENSMUSG00000003573 | Homer3     | -0.362650758 | 0.01603751  | 0.119384818 |
| ENSMUSG00000008683 | Rps15a     | 0.288734894  | 0.016048945 | 0.119384818 |
| ENSMUSG00000020328 | Nudcd2     | 0.226588187  | 0.01602283  | 0.119384818 |
| ENSMUSG00000020803 | Txndc17    | 0.24583146   | 0.015945736 | 0.119384818 |
| ENSMUSG00000027533 | Fabp5      | 0.344696218  | 0.016051256 | 0.119384818 |
| ENSMUSG00000039737 | Prkrip1    | 0.232333384  | 0.015977536 | 0.119384818 |
| ENSMUSG00000041836 | Ptpre      | -0.236440995 | 0.01600882  | 0.119384818 |
| ENSMUSG00000047959 | Kcna3      | -0.397459936 | 0.016025393 | 0.119384818 |
| ENSMUSG00000056643 | Chst13     | 0.300832153  | 0.016033311 | 0.119384818 |
| ENSMUSG00000079419 | Ms4a6c     | -0.328208919 | 0.016024852 | 0.119384818 |
| ENSMUSG00000084230 | Gm14388    | 0.273597072  | 0.016020997 | 0.119384818 |
| ENSMUSG00000117327 | AC114990.1 | 0.353968354  | 0.016035887 | 0.119384818 |
| ENSMUSG00000063785 | Utp14a     | 0.256747508  | 0.016084136 | 0.119557783 |
| ENSMUSG00000034345 | Gtf2h5     | 0.248559615  | 0.016099193 | 0.119598132 |
| ENSMUSG00000095677 | Dynlt1f    | 0.236008614  | 0.016109276 | 0.119601507 |
| ENSMUSG00000014771 | Pdcd2      | 0.263204574  | 0.016172893 | 0.119858895 |
| ENSMUSG00000022436 | Sh3bp1     | -0.299895471 | 0.016165694 | 0.119858895 |
| ENSMUSG00000022793 | B4galt4    | -0.227314434 | 0.01617015  | 0.119858895 |

|                    |           |              |             |             |
|--------------------|-----------|--------------|-------------|-------------|
| ENSMUSG00000038762 | Abcf1     | 0.252336237  | 0.016188284 | 0.119901419 |
| ENSMUSG00000012429 | Mplkip    | 0.217850735  | 0.016235117 | 0.120019923 |
| ENSMUSG00000021417 | Eci2      | 0.242962511  | 0.016231155 | 0.120019923 |
| ENSMUSG00000034795 | Ccdc122   | 0.390611986  | 0.016227411 | 0.120019923 |
| ENSMUSG00000091655 | Gm8741    | 0.260796544  | 0.016242935 | 0.120019923 |
| ENSMUSG00000070858 | Gm1673    | -0.382515441 | 0.016256259 | 0.120046967 |
| ENSMUSG00000059835 | Rpl13-ps3 | 0.216725322  | 0.016283596 | 0.120177388 |
| ENSMUSG00000021474 | Sfxn1     | 0.262610415  | 0.016349851 | 0.120435062 |
| ENSMUSG00000053931 | Cnn3      | -0.303459726 | 0.01636699  | 0.120435062 |
| ENSMUSG00000056501 | Cebpb     | -0.233172334 | 0.016347455 | 0.120435062 |
| ENSMUSG00000058755 | Osm       | -0.371622185 | 0.016359104 | 0.120435062 |
| ENSMUSG00000082460 | Gm13685   | 0.318591801  | 0.016365789 | 0.120435062 |
| ENSMUSG00000004707 | Ly9       | -0.301399795 | 0.016393929 | 0.120561866 |
| ENSMUSG00000066009 | Zfp987    | -0.063822613 | 0.016434505 | 0.120788748 |
| ENSMUSG00000030512 | Snrpa1    | 0.237981648  | 0.016452537 | 0.120849772 |
| ENSMUSG00000029632 | Ndufa4    | 0.20104713   | 0.016521484 | 0.121245004 |
| ENSMUSG00000081943 | Gm9078    | 0.136765017  | 0.016525867 | 0.121245004 |
| ENSMUSG00000068580 | Zfyve19   | -0.306845639 | 0.01661449  | 0.121751377 |
| ENSMUSG00000072940 | Gm10443   | 0.24134738   | 0.016612843 | 0.121751377 |
| ENSMUSG00000021427 | Ssr1      | 0.368766505  | 0.016642856 | 0.121887335 |
| ENSMUSG00000025949 | Pikfyve   | -0.337056993 | 0.01665368  | 0.12189473  |
| ENSMUSG00000067370 | B3galt4   | -0.302379085 | 0.01666378  | 0.121896824 |
| ENSMUSG00000005823 | Gpr108    | -0.254167219 | 0.016725014 | 0.122272746 |
| ENSMUSG00000022822 | Abcc5     | -0.307907845 | 0.016822793 | 0.122698715 |
| ENSMUSG00000024308 | Tapbp     | -0.319431792 | 0.016816704 | 0.122698715 |
| ENSMUSG00000035919 | Bbs9      | -0.367488598 | 0.01680212  | 0.122698715 |
| ENSMUSG00000095562 | Gm21887   | 0.370896504  | 0.016810275 | 0.122698715 |
| ENSMUSG00000036309 | Skp1a     | 0.218075897  | 0.016955406 | 0.123593368 |
| ENSMUSG00000035105 | Egln3     | 0.29480044   | 0.01698547  | 0.123739894 |
| ENSMUSG00000016534 | Lamp2     | 0.177622745  | 0.017007689 | 0.123808842 |
| ENSMUSG00000050108 | Bpifc     | -0.338161884 | 0.017014869 | 0.123808842 |
| ENSMUSG00000039716 | Dock3     | 0.094294219  | 0.017048664 | 0.123982119 |
| ENSMUSG00000019139 | Isyna1    | 0.289606434  | 0.017059022 | 0.123984849 |
| ENSMUSG00000014668 | Chfr      | -0.222666494 | 0.017072541 | 0.124010546 |
| ENSMUSG00000094017 | Gm13160   | 0.388752086  | 0.01711843  | 0.124271198 |
| ENSMUSG00000003233 | Dvl3      | -0.360004146 | 0.017185566 | 0.124685699 |
| ENSMUSG00000034424 | Gcsh      | 0.23803719   | 0.01722805  | 0.124848079 |
| ENSMUSG00000079010 | Gm11032   | -0.340079783 | 0.017218426 | 0.124848079 |
| ENSMUSG00000001383 | Zmat2     | 0.238733677  | 0.017241725 | 0.124874327 |
| ENSMUSG00000021872 | Rnase10   | 0.374289538  | 0.017264489 | 0.124917855 |
| ENSMUSG00000070319 | Eif3g     | 0.265130054  | 0.017267849 | 0.124917855 |
| ENSMUSG00000026526 | Fh1       | 0.306363989  | 0.017311484 | 0.12508781  |
| ENSMUSG00000091491 | Vmn2r97   | 0.244937383  | 0.017307801 | 0.12508781  |

|                    |         |              |             |             |
|--------------------|---------|--------------|-------------|-------------|
| ENSMUSG00000030007 | Cct7    | 0.209838678  | 0.017338896 | 0.125089348 |
| ENSMUSG00000031438 | Rnf128  | 0.356341804  | 0.017332736 | 0.125089348 |
| ENSMUSG00000093752 | Gm20716 | 0.006760489  | 0.017341909 | 0.125089348 |
| ENSMUSG00000020778 | Ten1    | 0.234264913  | 0.017376821 | 0.125221276 |
| ENSMUSG00000022312 | Eif3h   | 0.236654512  | 0.017380362 | 0.125221276 |
| ENSMUSG00000031167 | Rbm3    | 0.319405798  | 0.017408451 | 0.125350939 |
| ENSMUSG00000053317 | Sec61b  | 0.20411589   | 0.017434659 | 0.125466921 |
| ENSMUSG00000083713 | Gm5883  | 0.323946018  | 0.017464671 | 0.12561012  |
| ENSMUSG00000030980 | Knop1   | 0.249096788  | 0.017484599 | 0.125680671 |
| ENSMUSG00000032750 | Gab3    | -0.367439816 | 0.017524702 | 0.125896079 |
| ENSMUSG00000032536 | Trak1   | -0.372120466 | 0.017554743 | 0.126038995 |
| ENSMUSG00000061393 | Acvr2b  | -0.219572683 | 0.01759022  | 0.12622075  |
| ENSMUSG00000007987 | Ift22   | 0.240187567  | 0.017668612 | 0.126418104 |
| ENSMUSG00000022412 | Mief1   | -0.300869262 | 0.017649175 | 0.126418104 |
| ENSMUSG00000031848 | Lsm4    | 0.228312445  | 0.017661082 | 0.126418104 |
| ENSMUSG00000074220 | Zfp382  | -0.356122847 | 0.017648036 | 0.126418104 |
| ENSMUSG00000094392 | Gm3788  | -0.3751566   | 0.017660997 | 0.126418104 |
| ENSMUSG00000084845 | Tmem240 | -0.200711597 | 0.017684293 | 0.12645746  |
| ENSMUSG00000032089 | Ii10ra  | -0.358089954 | 0.017710262 | 0.126497509 |
| ENSMUSG00000113753 | Gm5791  | 0.382444952  | 0.017708486 | 0.126497509 |
| ENSMUSG00000040151 | Hs2st1  | -0.269981873 | 0.017722475 | 0.126511988 |
| ENSMUSG00000080904 | Gm11966 | 0.253419356  | 0.017738958 | 0.126556923 |
| ENSMUSG00000004633 | Chn2    | -0.322692994 | 0.017867023 | 0.127382877 |
| ENSMUSG00000007850 | Hnrnp1  | 0.363703441  | 0.01787524  | 0.127382877 |
| ENSMUSG00000055560 | Zfp459  | 0.20200844   | 0.01790662  | 0.127513    |
| ENSMUSG00000057666 | Gapdh   | 0.241166674  | 0.017914031 | 0.127513    |
| ENSMUSG00000026925 | Inpp5e  | -0.353216655 | 0.017937661 | 0.127608071 |
| ENSMUSG00000019590 | Cyb561  | 0.295913716  | 0.017973105 | 0.127664072 |
| ENSMUSG00000025140 | Pycr1   | -0.30392615  | 0.018006777 | 0.127664072 |
| ENSMUSG00000027424 | Mgme1   | -0.208842562 | 0.017984338 | 0.127664072 |
| ENSMUSG00000028102 | Pex11b  | -0.220270517 | 0.018003551 | 0.127664072 |
| ENSMUSG00000042133 | Ppig    | 0.1908415    | 0.018007202 | 0.127664072 |
| ENSMUSG00000051220 | Ercc6l  | -0.266713016 | 0.017965354 | 0.127664072 |
| ENSMUSG00000021130 | Galnt16 | -0.364943784 | 0.018041706 | 0.127762845 |
| ENSMUSG00000035933 | Cog5    | 0.332431963  | 0.018038753 | 0.127762845 |
| ENSMUSG00000027605 | Acss2   | -0.360967784 | 0.018064341 | 0.127850248 |
| ENSMUSG00000082662 | Gm15516 | 0.246544124  | 0.018088889 | 0.127951073 |
| ENSMUSG00000030342 | Cd9     | -0.230640119 | 0.018102383 | 0.127973645 |
| ENSMUSG00000025575 | Cant1   | -0.364423104 | 0.018124668 | 0.127985501 |
| ENSMUSG00000026781 | Acbd5   | -0.330409973 | 0.018116258 | 0.127985501 |
| ENSMUSG00000034765 | Dusp5   | -0.15634246  | 0.018154089 | 0.128120421 |
| ENSMUSG00000061950 | Ppp4r1  | -0.361245167 | 0.018263241 | 0.128817556 |
| ENSMUSG00000053716 | Dusp7   | -0.352615189 | 0.018297725 | 0.128910886 |

|                    |            |              |             |             |
|--------------------|------------|--------------|-------------|-------------|
| ENSMUSG00000058979 | Hdhd5      | -0.3032663   | 0.018317987 | 0.128910886 |
| ENSMUSG00000060679 | Mrps9      | 0.243393915  | 0.018313805 | 0.128910886 |
| ENSMUSG00000068663 | Clec16a    | -0.266834119 | 0.018309691 | 0.128910886 |
| ENSMUSG00000018377 | Vezf1      | -0.289722975 | 0.018389918 | 0.129170762 |
| ENSMUSG00000020423 | Btg2       | -0.312619535 | 0.01837268  | 0.129170762 |
| ENSMUSG00000030527 | Crtc3      | -0.363301202 | 0.018394772 | 0.129170762 |
| ENSMUSG00000046034 | Otulin     | 0.203829329  | 0.018396512 | 0.129170762 |
| ENSMUSG00000055541 | Lair1      | 0.234368924  | 0.018462227 | 0.129558936 |
| ENSMUSG00000035370 | Gm49322    | -0.124605503 | 0.018515856 | 0.129861913 |
| ENSMUSG00000002660 | Clpp       | 0.215859683  | 0.018527487 | 0.129870153 |
| ENSMUSG00000006641 | Slc5a6     | -0.330537743 | 0.018674956 | 0.130824251 |
| ENSMUSG00000020850 | Prpf8      | 0.365246236  | 0.018693558 | 0.130824251 |
| ENSMUSG00000021901 | Bap1       | -0.343042818 | 0.018695716 | 0.130824251 |
| ENSMUSG00000026749 | Nek6       | 0.278559754  | 0.018726795 | 0.130824251 |
| ENSMUSG00000038895 | Zfp653     | -0.361634124 | 0.018724458 | 0.130824251 |
| ENSMUSG00000084111 | Gm15710    | 0.106836851  | 0.018725906 | 0.130824251 |
| ENSMUSG00000039205 | Ciz1       | -0.292351757 | 0.018747775 | 0.130897199 |
| ENSMUSG00000099481 | Xndc1      | -0.298527719 | 0.018765375 | 0.130946477 |
| ENSMUSG00000025854 | Fam20c     | -0.343573085 | 0.01883508  | 0.131359081 |
| ENSMUSG00000055172 | C1ra       | -0.347451759 | 0.018855315 | 0.131426416 |
| ENSMUSG00000054226 | Tprkb      | 0.274723388  | 0.018917524 | 0.131712199 |
| ENSMUSG00000090381 | Gm6158     | 0.251273601  | 0.018915824 | 0.131712199 |
| ENSMUSG00000027303 | Ptptra     | -0.234163333 | 0.018930838 | 0.131731061 |
| ENSMUSG00000046993 | Gm5637     | 0.314967851  | 0.018963232 | 0.131882589 |
| ENSMUSG00000020782 | Llgl2      | -0.223307381 | 0.019031659 | 0.132284406 |
| ENSMUSG00000022744 | Cldnd1     | -0.246299973 | 0.019043308 | 0.132291347 |
| ENSMUSG00000014075 | Tctex1d2   | 0.25303474   | 0.019078697 | 0.132463104 |
| ENSMUSG00000001416 | Cct3       | 0.255554657  | 0.019113783 | 0.132631618 |
| ENSMUSG00000018678 | Sp2        | -0.351074627 | 0.019124324 | 0.132631618 |
| ENSMUSG00000035437 | Rabgap1    | -0.294304617 | 0.019138016 | 0.132652507 |
| ENSMUSG00000019796 | Lrp11      | -0.126408568 | 0.019161113 | 0.132738528 |
| ENSMUSG00000008200 | Fnbp4      | -0.259878348 | 0.019173479 | 0.132750154 |
| ENSMUSG00000027247 | Arhgap1    | -0.2497584   | 0.019243884 | 0.132860244 |
| ENSMUSG00000033610 | Pank1      | -0.259666879 | 0.019200085 | 0.132860244 |
| ENSMUSG00000039158 | Akna       | -0.358561261 | 0.019253558 | 0.132860244 |
| ENSMUSG00000042323 | Pbrm1      | -0.202764761 | 0.019237574 | 0.132860244 |
| ENSMUSG00000060166 | Zdhhc8     | -0.333413508 | 0.019228293 | 0.132860244 |
| ENSMUSG00000069236 | Gm7251     | 0.156316889  | 0.019214198 | 0.132860244 |
| ENSMUSG00000115205 | Gm16374    | 0.172305376  | 0.019323248 | 0.133267106 |
| ENSMUSG00000052087 | Rgs14      | 0.256533511  | 0.019382561 | 0.133601993 |
| ENSMUSG00000020255 | D10Wsu102e | 0.271451903  | 0.019410069 | 0.133674827 |
| ENSMUSG00000057657 | Rps18-ps3  | 0.359050902  | 0.019414652 | 0.133674827 |
| ENSMUSG00000029455 | Aldh2      | -0.300856108 | 0.019467516 | 0.133816281 |

|                    |               |              |             |             |
|--------------------|---------------|--------------|-------------|-------------|
| ENSMUSG00000068184 | Ndufaf2       | 0.266777343  | 0.019454629 | 0.133816281 |
| ENSMUSG00000078370 | Gm6316        | 0.113845013  | 0.019462048 | 0.133816281 |
| ENSMUSG00000001750 | Tcirg1        | -0.193182519 | 0.019523274 | 0.133924621 |
| ENSMUSG00000015377 | Dennd6b       | -0.359645169 | 0.019526406 | 0.133924621 |
| ENSMUSG00000024191 | Bnip1         | 0.227983187  | 0.019506762 | 0.133924621 |
| ENSMUSG00000041328 | Pcf11         | -0.304715067 | 0.019511606 | 0.133924621 |
| ENSMUSG00000084105 | Gm13252       | 0.196831098  | 0.019562787 | 0.1341001   |
| ENSMUSG00000032405 | Pias1         | -0.269794391 | 0.019589936 | 0.134212132 |
| ENSMUSG00000021697 | Depdc1b       | -0.270260389 | 0.01960968  | 0.134273341 |
| ENSMUSG00000024014 | Pim1          | 0.32945695   | 0.019650254 | 0.134477025 |
| ENSMUSG00000028068 | lqgap3        | -0.323288113 | 0.019687498 | 0.134657716 |
| ENSMUSG00000029722 | Agfg2         | -0.327633776 | 0.019709495 | 0.134733977 |
| ENSMUSG00000032030 | Cul5          | 0.318042248  | 0.019763812 | 0.135030975 |
| ENSMUSG00000026848 | Tor1b         | -0.24932791  | 0.019797416 | 0.135118941 |
| ENSMUSG00000079547 | H2-DMb1       | -0.295381371 | 0.019798444 | 0.135118941 |
| ENSMUSG00000003348 | Mob3a         | -0.283080152 | 0.019882068 | 0.135615135 |
| ENSMUSG00000019710 | Mrpl24        | 0.206476106  | 0.01990407  | 0.135690699 |
| ENSMUSG00000057193 | Slc44a2       | -0.285167813 | 0.019917358 | 0.135706804 |
| ENSMUSG00000029617 | Ccz1          | 0.24293017   | 0.019929766 | 0.135716898 |
| ENSMUSG00000025102 | 3110040N11Rik | 0.219491781  | 0.019970534 | 0.135845568 |
| ENSMUSG00000037894 | H2afz         | 0.226397872  | 0.019969581 | 0.135845568 |
| ENSMUSG00000033751 | Gadd45gip1    | 0.227163754  | 0.020000993 | 0.135956816 |
| ENSMUSG00000042293 | Gm5617        | -0.317663607 | 0.020030672 | 0.135956816 |
| ENSMUSG00000046330 | Rpl37a        | 0.219039297  | 0.020013877 | 0.135956816 |
| ENSMUSG00000055809 | Dnaaf3        | -0.330759966 | 0.02002002  | 0.135956816 |
| ENSMUSG00000040888 | Gfer          | 0.251751831  | 0.020090059 | 0.13628543  |
| ENSMUSG00000069376 | Gm5507        | 0.125000703  | 0.020122876 | 0.136433538 |
| ENSMUSG00000028453 | Fancg         | -0.329987464 | 0.020144711 | 0.136507071 |
| ENSMUSG00000049124 | Gm8186        | 0.257844754  | 0.020166862 | 0.136582658 |
| ENSMUSG00000025208 | Mrpl43        | 0.24702748   | 0.020196211 | 0.136706889 |
| ENSMUSG00000039810 | Zc3h10        | -0.293163445 | 0.020262559 | 0.137081286 |
| ENSMUSG00000020116 | Pno1          | 0.253056474  | 0.020341604 | 0.137466305 |
| ENSMUSG00000069917 | Hba-a2        | -0.058067665 | 0.020333659 | 0.137466305 |
| ENSMUSG00000038991 | Txndc5        | -0.272181732 | 0.020357672 | 0.137500076 |
| ENSMUSG00000027598 | ltch          | -0.301816758 | 0.02036979  | 0.13750715  |
| ENSMUSG00000027288 | Zfp106        | 0.301069646  | 0.020426627 | 0.137815933 |
| ENSMUSG00000006058 | Snf8          | -0.224646256 | 0.020477887 | 0.138086774 |
| ENSMUSG00000025290 | Rps24         | 0.216593684  | 0.020490471 | 0.138096659 |
| ENSMUSG00000018707 | Dync1h1       | 0.35207718   | 0.020533589 | 0.138162357 |
| ENSMUSG00000021832 | Psmc6         | 0.237551706  | 0.020522853 | 0.138162357 |
| ENSMUSG00000040383 | Aqr           | 0.339049803  | 0.020515376 | 0.138162357 |
| ENSMUSG00000027346 | Gpcpd1        | -0.334107599 | 0.020566951 | 0.138311908 |
| ENSMUSG00000025465 | Echs1         | 0.175099169  | 0.020610782 | 0.138437206 |

|                    |               |              |             |             |
|--------------------|---------------|--------------|-------------|-------------|
| ENSMUSG00000030166 | Rad52         | -0.33130281  | 0.020628258 | 0.138437206 |
| ENSMUSG00000037426 | Depdc5        | -0.350101759 | 0.020628894 | 0.138437206 |
| ENSMUSG00000059456 | Ptk2b         | -0.313290718 | 0.020630164 | 0.138437206 |
| ENSMUSG00000023170 | Gps2          | -0.240408049 | 0.020656051 | 0.138536077 |
| ENSMUSG00000008153 | Clstn3        | -0.335885395 | 0.020746011 | 0.139037704 |
| ENSMUSG00000020235 | Fzr1          | -0.257756045 | 0.020753233 | 0.139037704 |
| ENSMUSG00000022474 | Pmm1          | 0.240700466  | 0.02076714  | 0.139055873 |
| ENSMUSG00000022438 | Parvb         | -0.318152971 | 0.020794394 | 0.139163344 |
| ENSMUSG00000039617 | Gm7488        | 0.187503189  | 0.020858612 | 0.139517942 |
| ENSMUSG00000015312 | Gadd45b       | 0.349817063  | 0.020870385 | 0.139521559 |
| ENSMUSG00000113431 | Gm6722        | 0.14502574   | 0.020890108 | 0.139578287 |
| ENSMUSG00000039523 | Cep104        | -0.343865346 | 0.020908441 | 0.139625672 |
| ENSMUSG00000028059 | Arhgef2       | -0.306123975 | 0.021011761 | 0.14024024  |
| ENSMUSG00000004317 | Clcn5         | -0.095233453 | 0.021028279 | 0.140275106 |
| ENSMUSG00000047824 | Pygo2         | -0.323620935 | 0.021058367 | 0.140400414 |
| ENSMUSG00000027171 | Prrg4         | 0.102006527  | 0.021070118 | 0.140403397 |
| ENSMUSG00000021139 | Gm20498       | 0.264025011  | 0.021092413 | 0.140476605 |
| ENSMUSG00000020888 | Dvl2          | -0.297145305 | 0.021106346 | 0.140494067 |
| ENSMUSG00000027582 | Zgpat         | -0.256009951 | 0.021225031 | 0.141208413 |
| ENSMUSG00000056851 | Pcbp2         | 0.331569728  | 0.021248043 | 0.141285833 |
| ENSMUSG00000021270 | Hsp90aa1      | 0.341909575  | 0.021316423 | 0.141437653 |
| ENSMUSG00000022972 | Cfap298       | 0.24136267   | 0.021287953 | 0.141437653 |
| ENSMUSG00000030605 | Mfge8         | -0.332508155 | 0.021301222 | 0.141437653 |
| ENSMUSG00000074635 | 3110070M22Rik | 0.222250228  | 0.021316209 | 0.141437653 |
| ENSMUSG00000056091 | St3gal5       | -0.14039411  | 0.021355902 | 0.14162395  |
| ENSMUSG00000023942 | Slc29a1       | -0.267780969 | 0.02138104  | 0.141639507 |
| ENSMUSG00000041168 | Lonp1         | 0.266614046  | 0.021381054 | 0.141639507 |
| ENSMUSG00000105143 | Gm8069        | 0.294510762  | 0.021449725 | 0.142018676 |
| ENSMUSG00000027546 | Atp9a         | -0.18705967  | 0.021535272 | 0.142433232 |
| ENSMUSG00000028758 | Kif17         | -0.307492008 | 0.021530163 | 0.142433232 |
| ENSMUSG00000003206 | Ebi3          | -0.237904205 | 0.021589621 | 0.142440647 |
| ENSMUSG00000023089 | Ndufa5        | 0.228288852  | 0.021605776 | 0.142440647 |
| ENSMUSG00000025358 | Cdk2          | -0.269081781 | 0.021578921 | 0.142440647 |
| ENSMUSG00000032777 | Gtf3c1        | -0.335284989 | 0.021613662 | 0.142440647 |
| ENSMUSG00000044030 | Irf2bp1       | -0.327258372 | 0.021572998 | 0.142440647 |
| ENSMUSG00000048307 | Ankrd46       | -0.201043879 | 0.021578916 | 0.142440647 |
| ENSMUSG00000054277 | Arfgap3       | -0.312974066 | 0.021616667 | 0.142440647 |
| ENSMUSG00000052396 | Mogat2        | -0.309962812 | 0.02165113  | 0.142498378 |
| ENSMUSG00000071654 | Uqcc3         | 0.186482514  | 0.021659845 | 0.142498378 |
| ENSMUSG00000080747 | Gm14016       | 0.131345539  | 0.021642372 | 0.142498378 |
| ENSMUSG00000100405 | Gm28911       | 0.286427301  | 0.021677839 | 0.142541261 |
| ENSMUSG00000045691 | Thtpa         | -0.312113869 | 0.021719678 | 0.142740806 |
| ENSMUSG00000045975 | C2cd2         | -0.321079262 | 0.021765291 | 0.142889366 |

|                    |           |              |             |             |
|--------------------|-----------|--------------|-------------|-------------|
| ENSMUSG00000094111 | Nutf2-ps2 | 0.248152148  | 0.021764178 | 0.142889366 |
| ENSMUSG00000004099 | Dnmt1     | 0.259948129  | 0.021801357 | 0.142998802 |
| ENSMUSG00000038861 | Pi4kb     | -0.17562638  | 0.021804986 | 0.142998802 |
| ENSMUSG00000063524 | Eno1      | 0.238073005  | 0.021818633 | 0.143012794 |
| ENSMUSG00000030869 | Ndufab1   | 0.238115555  | 0.021843789 | 0.143102162 |
| ENSMUSG00000030432 | Rpl28     | 0.261984302  | 0.021856907 | 0.143112623 |
| ENSMUSG00000026798 | Coq4      | 0.318024991  | 0.021885167 | 0.143222158 |
| ENSMUSG00000039367 | Sec24c    | -0.330861259 | 0.021911105 | 0.143240964 |
| ENSMUSG00000044167 | Foxo1     | -0.340314771 | 0.021910231 | 0.143240964 |
| ENSMUSG00000113512 | Gm9063    | 0.34081651   | 0.021930166 | 0.14329016  |
| ENSMUSG00000038845 | Phb       | 0.285761447  | 0.021945952 | 0.143317914 |
| ENSMUSG00000026608 | Kctd3     | -0.255598474 | 0.021975796 | 0.143422881 |
| ENSMUSG00000030142 | Clec4e    | 0.340454982  | 0.021985119 | 0.143422881 |
| ENSMUSG00000002129 | Sf3a1     | -0.296707203 | 0.02200385  | 0.143469721 |
| ENSMUSG00000116580 | Gm9525    | 0.131180443  | 0.022028518 | 0.143555206 |
| ENSMUSG00000004018 | Fancl     | 0.289164861  | 0.022058124 | 0.143597462 |
| ENSMUSG00000030826 | Bcat2     | 0.263048957  | 0.022054512 | 0.143597462 |
| ENSMUSG00000024829 | Mrpl21    | 0.234000809  | 0.022084158 | 0.143616401 |
| ENSMUSG00000032014 | Oaf       | -0.318391802 | 0.02208161  | 0.143616401 |
| ENSMUSG00000021486 | Prelid1   | 0.312325762  | 0.022115824 | 0.143747067 |
| ENSMUSG00000015013 | Trappc2l  | 0.20305609   | 0.022198798 | 0.14388474  |
| ENSMUSG00000024858 | Grk2      | -0.29932239  | 0.022192525 | 0.14388474  |
| ENSMUSG00000025212 | Sfxn3     | -0.333289445 | 0.022188977 | 0.14388474  |
| ENSMUSG00000026872 | Zeb2      | -0.305858993 | 0.022170518 | 0.14388474  |
| ENSMUSG00000027329 | Spef1     | -0.153730101 | 0.022206509 | 0.14388474  |
| ENSMUSG00000031378 | Abcd1     | -0.289692482 | 0.022201314 | 0.14388474  |
| ENSMUSG00000020263 | Appl2     | -0.331331997 | 0.02226561  | 0.144192461 |
| ENSMUSG00000044258 | Ctla2a    | 0.268160559  | 0.022287539 | 0.144259264 |
| ENSMUSG00000049086 | Bmyc      | -0.248641169 | 0.02232203  | 0.144407255 |
| ENSMUSG00000029676 | Pot1a     | -0.308907624 | 0.022340353 | 0.14445056  |
| ENSMUSG00000030649 | Anapc15   | 0.207949394  | 0.022387222 | 0.144678293 |
| ENSMUSG00000026782 | Abi2      | -0.189534748 | 0.022445872 | 0.144963219 |
| ENSMUSG00000043059 | Zfp513    | -0.320290285 | 0.022454652 | 0.144963219 |
| ENSMUSG00000041351 | Rap1gap   | -0.10133423  | 0.022472217 | 0.14499931  |
| ENSMUSG00000110444 | Gm10033   | -0.325754627 | 0.02248359  | 0.14499931  |
| ENSMUSG00000007837 | Prrg2     | -0.329343323 | 0.022501416 | 0.145038963 |
| ENSMUSG00000018008 | Cyth4     | -0.329848247 | 0.022551122 | 0.145072594 |
| ENSMUSG00000028796 | Phc2      | -0.314584082 | 0.022565031 | 0.145072594 |
| ENSMUSG00000038034 | Igsf8     | -0.231556774 | 0.022536584 | 0.145072594 |
| ENSMUSG00000043923 | Ccdc84    | -0.258165984 | 0.022564579 | 0.145072594 |
| ENSMUSG00000051351 | Zfp46     | -0.332802127 | 0.022525379 | 0.145072594 |
| ENSMUSG00000000339 | Rtca      | 0.223246846  | 0.02278846  | 0.146433244 |
| ENSMUSG00000005510 | Ndufs3    | 0.209459704  | 0.022833903 | 0.146608923 |

|                    |           |              |             |             |
|--------------------|-----------|--------------|-------------|-------------|
| ENSMUSG00000029345 | Tfip11    | -0.298379078 | 0.022839406 | 0.146608923 |
| ENSMUSG00000060373 | Hnrnpc    | 0.265713417  | 0.022864087 | 0.14669154  |
| ENSMUSG00000042901 | Aida      | -0.298163886 | 0.022881346 | 0.146726486 |
| ENSMUSG00000039157 | Fam102a   | -0.083885299 | 0.022900097 | 0.146770954 |
| ENSMUSG00000024941 | Scyl1     | -0.214740714 | 0.022976879 | 0.147072753 |
| ENSMUSG00000032330 | Cox7a2    | 0.211483708  | 0.022982708 | 0.147072753 |
| ENSMUSG00000051950 | B3glct    | 0.297011217  | 0.022965077 | 0.147072753 |
| ENSMUSG00000024867 | Pip5k1b   | 0.328438452  | 0.022996996 | 0.14708841  |
| ENSMUSG00000040613 | Apobec1   | -0.310970688 | 0.023019839 | 0.147135481 |
| ENSMUSG00000040746 | Rnf167    | -0.229251737 | 0.023028047 | 0.147135481 |
| ENSMUSG00000031862 | Atp13a1   | -0.290314792 | 0.023047229 | 0.147182331 |
| ENSMUSG00000019960 | Dusp6     | -0.295792714 | 0.023095371 | 0.147413978 |
| ENSMUSG00000083097 | Gm14494   | 0.219729978  | 0.023118106 | 0.147483304 |
| ENSMUSG00000037306 | Man1c1    | -0.31663083  | 0.023168967 | 0.147731897 |
| ENSMUSG00000001289 | Pfdn5     | 0.19740487   | 0.023289181 | 0.148215341 |
| ENSMUSG00000031790 | Mmp15     | -0.174760673 | 0.02328186  | 0.148215341 |
| ENSMUSG00000033416 | Gucd1     | -0.329407219 | 0.02331866  | 0.148215341 |
| ENSMUSG00000062373 | Tmem65    | -0.315335419 | 0.023319023 | 0.148215341 |
| ENSMUSG00000094724 | Rnaset2b  | 0.230755162  | 0.023325214 | 0.148215341 |
| ENSMUSG00000098028 | Gm8824    | 0.10556588   | 0.023328314 | 0.148215341 |
| ENSMUSG00000110277 | Gm45871   | -0.328419075 | 0.023314808 | 0.148215341 |
| ENSMUSG00000037062 | Sh3glb1   | -0.272719395 | 0.023341345 | 0.148222316 |
| ENSMUSG00000024507 | Hsd17b4   | -0.253044013 | 0.023387782 | 0.148365494 |
| ENSMUSG00000039055 | Eme1      | -0.239450518 | 0.02338776  | 0.148365494 |
| ENSMUSG00000020361 | Hspa4     | 0.223120588  | 0.023427429 | 0.148365862 |
| ENSMUSG00000051579 | Tceal8    | 0.246921678  | 0.023421305 | 0.148365862 |
| ENSMUSG00000067870 | Rpl31-ps8 | 0.227591355  | 0.023435619 | 0.148365862 |
| ENSMUSG00000080859 | Rpl10-ps1 | 0.27858914   | 0.023406921 | 0.148365862 |
| ENSMUSG00000027099 | Mtx2      | 0.221196223  | 0.023521006 | 0.148830574 |
| ENSMUSG00000037847 | Nmrk1     | -0.271482882 | 0.023557089 | 0.148982997 |
| ENSMUSG00000020644 | Id2       | 0.240327528  | 0.023608701 | 0.149157515 |
| ENSMUSG00000029836 | Cbx3      | 0.299497261  | 0.023599502 | 0.149157515 |
| ENSMUSG00000028385 | Snx30     | -0.298969091 | 0.023644284 | 0.149230514 |
| ENSMUSG00000046985 | Tapt1     | -0.244973332 | 0.023635643 | 0.149230514 |
| ENSMUSG00000003072 | Atp5d     | 0.250495171  | 0.023713254 | 0.14951387  |
| ENSMUSG00000049988 | Lrrc25    | -0.195184331 | 0.023702795 | 0.14951387  |
| ENSMUSG00000020289 | Nprl3     | -0.31566582  | 0.0237429   | 0.149624843 |
| ENSMUSG00000020484 | Xbp1      | -0.187970885 | 0.023763457 | 0.149678446 |
| ENSMUSG00000025357 | Dgka      | -0.2593696   | 0.023827582 | 0.150006286 |
| ENSMUSG00000061559 | Wdr61     | 0.22341195   | 0.0238799   | 0.150259493 |
| ENSMUSG00000080777 | Gm15365   | 0.121266984  | 0.023909152 | 0.15036738  |
| ENSMUSG00000032177 | Pde4a     | -0.319733383 | 0.023929367 | 0.150418352 |
| ENSMUSG00000027306 | Nusap1    | -0.293019884 | 0.023963245 | 0.150555117 |

|                    |             |              |             |             |
|--------------------|-------------|--------------|-------------|-------------|
| ENSMUSG00000019132 | BC005537    | 0.326671868  | 0.024019873 | 0.150834603 |
| ENSMUSG00000032370 | Lactb       | 0.232747243  | 0.02404666  | 0.150926511 |
| ENSMUSG00000032657 | Fam189b     | -0.312649861 | 0.024067792 | 0.15098285  |
| ENSMUSG00000027361 | Gabpb1      | -0.22726825  | 0.024113274 | 0.151000689 |
| ENSMUSG00000030780 | BC017158    | -0.271919769 | 0.024085667 | 0.151000689 |
| ENSMUSG00000038085 | Cnbd2       | -0.272245809 | 0.024127832 | 0.151000689 |
| ENSMUSG00000038324 | Trpc4ap     | -0.236774295 | 0.02413142  | 0.151000689 |
| ENSMUSG00000059208 | Hnrnpm      | 0.221849262  | 0.024110731 | 0.151000689 |
| ENSMUSG00000053560 | Ier2        | -0.268337841 | 0.024146298 | 0.151017709 |
| ENSMUSG00000042215 | Bag2        | 0.264700062  | 0.024179874 | 0.151093237 |
| ENSMUSG00000042628 | Zfyve1      | -0.151614836 | 0.024188364 | 0.151093237 |
| ENSMUSG00000055717 | Slain1      | -0.293545533 | 0.024194867 | 0.151093237 |
| ENSMUSG00000020472 | Zkscan17    | -0.23737333  | 0.024290188 | 0.151476351 |
| ENSMUSG00000032478 | Nme6        | 0.206290098  | 0.024282784 | 0.151476351 |
| ENSMUSG00000059108 | Ifitm6      | -0.292715254 | 0.024292802 | 0.151476351 |
| ENSMUSG00000034566 | Atp5h       | 0.164730399  | 0.024356647 | 0.151798247 |
| ENSMUSG00000042810 | Krba1       | -0.075295513 | 0.024423017 | 0.152059295 |
| ENSMUSG00000056413 | Adap1       | -0.286483468 | 0.024412303 | 0.152059295 |
| ENSMUSG00000021932 | Rnaseh2b    | 0.202704904  | 0.024469147 | 0.152193928 |
| ENSMUSG00000073633 | Fbxo36      | 0.268793124  | 0.024458976 | 0.152193928 |
| ENSMUSG00000036054 | Sugp2       | -0.278939361 | 0.024499691 | 0.152307637 |
| ENSMUSG00000021360 | Gcnt2       | -0.261863414 | 0.02453631  | 0.152458981 |
| ENSMUSG00000034437 | Gm9761      | 0.203918881  | 0.024584088 | 0.152603174 |
| ENSMUSG00000045302 | Preb        | -0.226013645 | 0.024581133 | 0.152603174 |
| ENSMUSG00000024083 | Pja2        | -0.306419506 | 0.02463497  | 0.152842637 |
| ENSMUSG0000000303  | Cdh1        | -0.083921115 | 0.024667703 | 0.152969315 |
| ENSMUSG00000033467 | Crlf2       | -0.286293813 | 0.024690116 | 0.153031903 |
| ENSMUSG00000024436 | Mrps18b     | 0.246438064  | 0.024703734 | 0.153039939 |
| ENSMUSG00000014470 | Rnf166      | -0.236784987 | 0.024725463 | 0.153084778 |
| ENSMUSG00000085028 | Slc2a4rg-ps | -0.195641352 | 0.024735621 | 0.153084778 |
| ENSMUSG00000030929 | Eri2        | -0.272690994 | 0.024749127 | 0.153092084 |
| ENSMUSG00000040312 | Cchcr1      | -0.277695497 | 0.024796027 | 0.153305847 |
| ENSMUSG00000049858 | Suox        | -0.32067852  | 0.024884355 | 0.153698941 |
| ENSMUSG00000092349 | Platr17     | -0.303335019 | 0.024879473 | 0.153698941 |
| ENSMUSG00000041609 | Bicdl1      | -0.320386977 | 0.024926432 | 0.15388231  |
| ENSMUSG00000032382 | Snx1        | -0.219708144 | 0.024963    | 0.154031509 |
| ENSMUSG00000021548 | Ccnh        | 0.209961059  | 0.024983455 | 0.154061378 |
| ENSMUSG00000042417 | Ccno        | 0.238464808  | 0.024992648 | 0.154061378 |
| ENSMUSG00000033538 | Casp4       | 0.30944755   | 0.025013353 | 0.154112527 |
| ENSMUSG00000000958 | Slc7a7      | -0.300596299 | 0.025065952 | 0.154190074 |
| ENSMUSG00000019437 | Tlcd1       | 0.313318578  | 0.025057121 | 0.154190074 |
| ENSMUSG00000020936 | Nmt1        | 0.264527493  | 0.025075594 | 0.154190074 |
| ENSMUSG00000039637 | Coro7       | -0.317781595 | 0.025071065 | 0.154190074 |

|                    |            |              |             |             |
|--------------------|------------|--------------|-------------|-------------|
| ENSMUSG0000005204  | Senp3      | 0.30746881   | 0.02515899  | 0.154549856 |
| ENSMUSG00000037805 | Rpl10a     | 0.192931762  | 0.025156209 | 0.154549856 |
| ENSMUSG00000025245 | Lztf1l     | 0.258539979  | 0.02524208  | 0.154921298 |
| ENSMUSG00000061086 | Myl4       | 0.228696131  | 0.025244401 | 0.154921298 |
| ENSMUSG00000075245 | Gm6043     | 0.255702949  | 0.02532723  | 0.155352848 |
| ENSMUSG00000025791 | Pgm1       | 0.201026329  | 0.02541415  | 0.155578687 |
| ENSMUSG00000029486 | Mrpl1      | 0.229267182  | 0.025409029 | 0.155578687 |
| ENSMUSG00000030470 | Csrp3      | -0.261637868 | 0.025398126 | 0.155578687 |
| ENSMUSG00000037742 | Eef1a1     | 0.266109079  | 0.025396231 | 0.155578687 |
| ENSMUSG00000029720 | Gm20605    | -0.274927097 | 0.025541612 | 0.156281953 |
| ENSMUSG00000011877 | Git1       | -0.316395302 | 0.025574562 | 0.156406518 |
| ENSMUSG00000041891 | Lman1      | 0.290333218  | 0.025628076 | 0.156656659 |
| ENSMUSG00000026688 | Mgst3      | 0.240330877  | 0.025689521 | 0.156877849 |
| ENSMUSG00000029207 | Apbb2      | 0.07068059   | 0.025687859 | 0.156877849 |
| ENSMUSG00000029413 | Naaa       | -0.269425931 | 0.025710273 | 0.15692742  |
| ENSMUSG00000021178 | Psmc1      | 0.209579966  | 0.025791391 | 0.15734522  |
| ENSMUSG00000018765 | Fxr2       | -0.311399167 | 0.025875463 | 0.157386671 |
| ENSMUSG00000026245 | Farsb      | 0.208763152  | 0.025813489 | 0.157386671 |
| ENSMUSG00000035900 | Gramd4     | -0.283773512 | 0.025881284 | 0.157386671 |
| ENSMUSG00000045382 | Cxcr4      | -0.297673758 | 0.025844525 | 0.157386671 |
| ENSMUSG00000046756 | Mrps7      | 0.212843102  | 0.025886883 | 0.157386671 |
| ENSMUSG00000057596 | Trim30d    | -0.295820993 | 0.025833207 | 0.157386671 |
| ENSMUSG00000104217 | Gm37988    | 0.262927314  | 0.025872693 | 0.157386671 |
| ENSMUSG00000079794 | AC125149.2 | 0.147879995  | 0.025972823 | 0.157831915 |
| ENSMUSG00000028906 | Epb41      | 0.298190663  | 0.026040796 | 0.158167596 |
| ENSMUSG00000001622 | Csn3       | -0.124289838 | 0.026061521 | 0.158216106 |
| ENSMUSG00000018974 | Sart3      | -0.248602449 | 0.026076088 | 0.158227204 |
| ENSMUSG00000082423 | Gm15148    | 0.293351083  | 0.026103214 | 0.158314466 |
| ENSMUSG00000046434 | Hnrnpa1    | 0.274980437  | 0.026136024 | 0.158436093 |
| ENSMUSG00000044927 | H1fx       | -0.131492134 | 0.026154496 | 0.158470728 |
| ENSMUSG00000026193 | Fn1        | -0.304407877 | 0.026171467 | 0.15849624  |
| ENSMUSG00000040481 | Bptf       | 0.311316784  | 0.026211879 | 0.158663621 |
| ENSMUSG00000026248 | Mrpl44     | 0.227180795  | 0.026230867 | 0.158701217 |
| ENSMUSG00000021460 | Auh        | 0.199269937  | 0.026285904 | 0.158956773 |
| ENSMUSG00000041959 | S100a10    | -0.235262954 | 0.026361194 | 0.159257001 |
| ENSMUSG00000050890 | Pdik1l     | -0.222513304 | 0.026349616 | 0.159257001 |
| ENSMUSG00000021103 | Mnat1      | 0.223641797  | 0.0264203   | 0.159527435 |
| ENSMUSG00000029030 | Tprgl      | -0.263786267 | 0.026437498 | 0.159527435 |
| ENSMUSG00000115219 | Eef1akmt4  | 0.241357538  | 0.026444488 | 0.159527435 |
| ENSMUSG00000031770 | Herpud1    | -0.300450188 | 0.026489258 | 0.159719936 |
| ENSMUSG00000040557 | Mettl27    | -0.169771144 | 0.02650596  | 0.1597431   |
| ENSMUSG00000030016 | Zfp638     | -0.246300296 | 0.026540519 | 0.159873805 |
| ENSMUSG00000010406 | Mrpl52     | 0.288561741  | 0.026564768 | 0.159942309 |

|                    |               |              |             |             |
|--------------------|---------------|--------------|-------------|-------------|
| ENSMUSG00000063856 | Gpx1          | 0.190583685  | 0.026623441 | 0.160217908 |
| ENSMUSG00000004054 | Map3k11       | -0.316662247 | 0.026640847 | 0.160245017 |
| ENSMUSG00000052056 | Zfp217        | 0.177407795  | 0.026654812 | 0.160251416 |
| ENSMUSG00000037750 | Fam222b       | -0.253046044 | 0.026766074 | 0.16084248  |
| ENSMUSG00000009292 | Trpm2         | -0.304446192 | 0.026804421 | 0.160995024 |
| ENSMUSG00000049553 | Polr1a        | -0.284534644 | 0.026838226 | 0.161120157 |
| ENSMUSG00000030468 | Siglecg       | -0.270760578 | 0.026858989 | 0.161166908 |
| ENSMUSG00000036752 | Tubb4b        | 0.229852253  | 0.026879434 | 0.16121171  |
| ENSMUSG00000035476 | Tab3          | -0.112774894 | 0.026921511 | 0.16130829  |
| ENSMUSG00000087403 | Kantr         | -0.303967377 | 0.026909897 | 0.16130829  |
| ENSMUSG00000005686 | Ampd3         | -0.127836302 | 0.026936722 | 0.161321614 |
| ENSMUSG00000025577 | Cbx2          | -0.25629483  | 0.026984312 | 0.161449618 |
| ENSMUSG00000044934 | Zfp367        | -0.264952949 | 0.02699709  | 0.161449618 |
| ENSMUSG00000061374 | Fiz1          | -0.269267289 | 0.02699421  | 0.161449618 |
| ENSMUSG00000030521 | Mphosph10     | 0.217129675  | 0.027039127 | 0.161545452 |
| ENSMUSG00000035495 | Tstd2         | -0.230355406 | 0.027026695 | 0.161545452 |
| ENSMUSG00000013698 | Pea15a        | -0.274185614 | 0.027094524 | 0.161748862 |
| ENSMUSG00000024640 | Psat1         | 0.217482315  | 0.02710436  | 0.161748862 |
| ENSMUSG00000029701 | Rbm28         | 0.287810192  | 0.02711224  | 0.161748862 |
| ENSMUSG00000023791 | Pigx          | 0.218923337  | 0.027181821 | 0.162086124 |
| ENSMUSG00000020775 | Mrpl38        | 0.21262142   | 0.027222732 | 0.162252187 |
| ENSMUSG00000031889 | D230025D16Rik | -0.240976648 | 0.027279744 | 0.1624361   |
| ENSMUSG00000107257 | Gm43028       | 0.109115582  | 0.027279127 | 0.1624361   |
| ENSMUSG00000032582 | Rbm6          | -0.242015402 | 0.027385688 | 0.162832757 |
| ENSMUSG00000042408 | Zmym6         | -0.302010006 | 0.027359989 | 0.162832757 |
| ENSMUSG00000072919 | Noxred1       | 0.141795568  | 0.027375503 | 0.162832757 |
| ENSMUSG00000057789 | Bak1          | 0.192904626  | 0.027439926 | 0.163077184 |
| ENSMUSG00000058838 | Rps27a-ps2    | 0.246803481  | 0.027510529 | 0.163418595 |
| ENSMUSG00000022401 | Xpnpep3       | -0.27410051  | 0.027580098 | 0.163626627 |
| ENSMUSG00000029670 | Ing3          | -0.208751517 | 0.02758507  | 0.163626627 |
| ENSMUSG00000114380 | Gm47942       | 0.226507632  | 0.027581256 | 0.163626627 |
| ENSMUSG00000032633 | Fln           | -0.266566876 | 0.027713333 | 0.164308979 |
| ENSMUSG00000024260 | Sap130        | -0.301471145 | 0.02778263  | 0.164641246 |
| ENSMUSG00000005417 | Mprip         | -0.248179129 | 0.027824828 | 0.164812682 |
| ENSMUSG00000030591 | Psmc8         | 0.169307358  | 0.027885633 | 0.165094113 |
| ENSMUSG00000032459 | Mrps22        | 0.21451577   | 0.02797589  | 0.165481931 |
| ENSMUSG00000049421 | Zfp260        | -0.285637304 | 0.027977784 | 0.165481931 |
| ENSMUSG00000057396 | Zfp759        | -0.105720603 | 0.028008684 | 0.165585847 |
| ENSMUSG00000020358 | Hnrnpab       | 0.273721965  | 0.02806629  | 0.165689824 |
| ENSMUSG00000031443 | F7            | 0.301812006  | 0.028049134 | 0.165689824 |
| ENSMUSG00000040843 | Tiprl         | 0.236190547  | 0.028062953 | 0.165689824 |
| ENSMUSG00000020696 | Rffl          | -0.23724585  | 0.028109096 | 0.165748798 |
| ENSMUSG00000025821 | Zfp282        | -0.291128637 | 0.028129657 | 0.165748798 |

|                    |           |              |             |             |
|--------------------|-----------|--------------|-------------|-------------|
| ENSMUSG00000057963 | Itpk1     | -0.293336216 | 0.028118122 | 0.165748798 |
| ENSMUSG00000067714 | Lpar5     | -0.229529172 | 0.028115486 | 0.165748798 |
| ENSMUSG00000020740 | Gga3      | -0.281007568 | 0.028152426 | 0.165804306 |
| ENSMUSG00000070348 | Ccnd1     | 0.29571792   | 0.028193019 | 0.165964686 |
| ENSMUSG00000058392 | Rrp1b     | 0.229500903  | 0.028255482 | 0.166253598 |
| ENSMUSG00000099313 | Gm27152   | 0.240699799  | 0.028283096 | 0.166337282 |
| ENSMUSG00000103906 | Tigd5     | -0.297215568 | 0.028313732 | 0.166438651 |
| ENSMUSG00000005774 | Rfx5      | -0.29348234  | 0.028360999 | 0.166492657 |
| ENSMUSG00000020315 | Sptbn1    | 0.302799798  | 0.028382195 | 0.166492657 |
| ENSMUSG00000028042 | Zbtb7b    | -0.233721795 | 0.02838994  | 0.166492657 |
| ENSMUSG00000028849 | Map7d1    | -0.289550616 | 0.028387787 | 0.166492657 |
| ENSMUSG00000096617 | Gm5559    | 0.022230693  | 0.028383478 | 0.166492657 |
| ENSMUSG00000002871 | Tpra1     | -0.232151342 | 0.028431822 | 0.166659585 |
| ENSMUSG00000046364 | Rpl27a    | 0.26883759   | 0.028460111 | 0.166746714 |
| ENSMUSG00000033083 | Tbc1d4    | -0.287083827 | 0.028518967 | 0.167012773 |
| ENSMUSG00000031216 | Stard8    | -0.269193227 | 0.02854983  | 0.167036004 |
| ENSMUSG00000094974 | Rps19-ps2 | 0.175792699  | 0.028549716 | 0.167036004 |
| ENSMUSG00000057363 | Uxs1      | 0.221046167  | 0.028573762 | 0.167097315 |
| ENSMUSG00000074547 | Rps8-ps4  | 0.121419333  | 0.02861215  | 0.167243063 |
| ENSMUSG00000062376 | Borcs7    | 0.220214764  | 0.028661275 | 0.167451407 |
| ENSMUSG00000000948 | Gm38393   | -0.27824347  | 0.028727479 | 0.167631693 |
| ENSMUSG00000019978 | Epb41l2   | -0.295957857 | 0.028803737 | 0.167631693 |
| ENSMUSG00000028468 | Rgp1      | -0.168716825 | 0.028772946 | 0.167631693 |
| ENSMUSG00000033294 | Noc4l     | 0.193117846  | 0.028787057 | 0.167631693 |
| ENSMUSG00000038828 | Tmem214   | -0.260338426 | 0.028813595 | 0.167631693 |
| ENSMUSG00000040389 | Wdr47     | -0.264203552 | 0.028800554 | 0.167631693 |
| ENSMUSG00000040447 | Spns2     | -0.271072695 | 0.028787786 | 0.167631693 |
| ENSMUSG00000057948 | Unc13d    | -0.21582694  | 0.028735586 | 0.167631693 |
| ENSMUSG00000061983 | Rps12     | 0.286186571  | 0.028806141 | 0.167631693 |
| ENSMUSG00000027341 | Tmem230   | -0.194059856 | 0.028889453 | 0.167915718 |
| ENSMUSG00000030763 | Lcmt1     | 0.235131625  | 0.02887902  | 0.167915718 |
| ENSMUSG00000006763 | Saal1     | 0.197516859  | 0.028925255 | 0.167928946 |
| ENSMUSG00000078773 | Rad54b    | -0.257891069 | 0.028932288 | 0.167928946 |
| ENSMUSG00000079057 | Cyp4v3    | -0.254959077 | 0.028924103 | 0.167928946 |
| ENSMUSG00000019373 | Cops3     | 0.169059935  | 0.028961264 | 0.167940179 |
| ENSMUSG00000031916 | Cog8      | -0.229671086 | 0.02895132  | 0.167940179 |
| ENSMUSG00000022106 | Rcbtb2    | -0.21141783  | 0.028990141 | 0.168029186 |
| ENSMUSG00000042729 | Wdr74     | 0.205616162  | 0.029004337 | 0.168033056 |
| ENSMUSG00000021338 | Carmil1   | -0.165605381 | 0.029057093 | 0.168102549 |
| ENSMUSG00000024042 | Sik1      | -0.101116544 | 0.029078228 | 0.168102549 |
| ENSMUSG00000024352 | Spata24   | 0.248465397  | 0.029093766 | 0.168102549 |
| ENSMUSG00000027406 | ldh3b     | 0.208696159  | 0.029094119 | 0.168102549 |
| ENSMUSG00000030509 | Asb7      | -0.188825308 | 0.029065635 | 0.168102549 |

|                     |            |              |             |             |
|---------------------|------------|--------------|-------------|-------------|
| ENSMUSG00000035781  | R3hdm4     | -0.205600965 | 0.029097535 | 0.168102549 |
| ENSMUSG00000002968  | Med25      | -0.219048408 | 0.029111826 | 0.168106923 |
| ENSMUSG000000084131 | Rpl3-ps2   | 0.0899872    | 0.029138483 | 0.168182667 |
| ENSMUSG000000026342 | Slc35f5    | -0.241357695 | 0.029152582 | 0.168185892 |
| ENSMUSG000000026068 | Il18rap    | 0.250416462  | 0.029209554 | 0.168436339 |
| ENSMUSG000000022466 | Rpap3      | 0.205705153  | 0.029253479 | 0.168611351 |
| ENSMUSG000000007216 | Zfp775     | -0.176344692 | 0.029337147 | 0.16862411  |
| ENSMUSG000000021376 | Tpmt       | 0.245851886  | 0.029325725 | 0.16862411  |
| ENSMUSG000000027952 | Pmvk       | 0.21832178   | 0.029288254 | 0.16862411  |
| ENSMUSG000000039704 | Lmbrd2     | 0.105410719  | 0.029330696 | 0.16862411  |
| ENSMUSG000000059851 | Kmt5c      | -0.268796591 | 0.029320719 | 0.16862411  |
| ENSMUSG000000079677 | Fdx1l      | 0.253315267  | 0.029330401 | 0.16862411  |
| ENSMUSG000000021820 | Camk2g     | -0.155452086 | 0.029370533 | 0.168686919 |
| ENSMUSG000000113308 | Gm48445    | 0.200014978  | 0.029375236 | 0.168686919 |
| ENSMUSG000000027423 | Snx5       | 0.240129577  | 0.029405272 | 0.168780447 |
| ENSMUSG000000090516 | Rps11-ps1  | 0.218558005  | 0.0294187   | 0.168780447 |
| ENSMUSG000000026426 | Arl8a      | -0.249986532 | 0.029434094 | 0.168790806 |
| ENSMUSG000000054715 | Zscan22    | -0.272754438 | 0.029450023 | 0.168804214 |
| ENSMUSG000000003435 | Supt5      | -0.266229505 | 0.029575225 | 0.169443665 |
| ENSMUSG000000042642 | Flad1      | -0.233523458 | 0.029593153 | 0.169468211 |
| ENSMUSG000000019837 | Gtf3c6     | 0.184815776  | 0.029625033 | 0.169572597 |
| ENSMUSG000000021830 | Txndc16    | -0.257847414 | 0.029717739 | 0.169943759 |
| ENSMUSG000000021967 | Mrpl57     | 0.1844536    | 0.029718556 | 0.169943759 |
| ENSMUSG000000034266 | Batf       | 0.255030228  | 0.029744604 | 0.169943759 |
| ENSMUSG000000064179 | Tnnt1      | 0.289904423  | 0.029733731 | 0.169943759 |
| ENSMUSG000000057894 | Zfp329     | -0.261322192 | 0.029795418 | 0.170155812 |
| ENSMUSG000000061474 | Mrps36     | 0.189195478  | 0.02981797  | 0.170206342 |
| ENSMUSG000000026254 | Eif4e2     | 0.19071185   | 0.029866725 | 0.170406338 |
| ENSMUSG000000034729 | Mrps10     | 0.256617109  | 0.029914246 | 0.17054899  |
| ENSMUSG000000071660 | Ttc9c      | -0.250554323 | 0.029924252 | 0.17054899  |
| ENSMUSG000000079511 | Gm42688    | -0.262362986 | 0.02993292  | 0.17054899  |
| ENSMUSG000000081087 | Rps15a-ps7 | 0.249320461  | 0.029964515 | 0.170613898 |
| ENSMUSG000000108793 | Gm45213    | 0.250216494  | 0.029971784 | 0.170613898 |
| ENSMUSG000000021610 | Clptm1l    | 0.193270641  | 0.030021148 | 0.170816619 |
| ENSMUSG000000031756 | Cenpn      | -0.210740796 | 0.030058661 | 0.170951753 |
| ENSMUSG000000025995 | Wdr75      | 0.263357227  | 0.030151464 | 0.171124668 |
| ENSMUSG000000028552 | Eps15      | 0.225246623  | 0.030103352 | 0.171124668 |
| ENSMUSG000000037965 | Zc3h7a     | -0.216898548 | 0.030151268 | 0.171124668 |
| ENSMUSG000000059534 | Uqcr10     | 0.221971535  | 0.03015795  | 0.171124668 |
| ENSMUSG000000106883 | Gm34091    | 0.107837461  | 0.030143406 | 0.171124668 |
| ENSMUSG000000001588 | Acap1      | -0.214484539 | 0.030214411 | 0.171132331 |
| ENSMUSG000000022801 | Lrch3      | -0.265016912 | 0.030182562 | 0.171132331 |
| ENSMUSG000000031433 | Rbm41      | 0.275889631  | 0.030205467 | 0.171132331 |

|                    |               |              |             |             |
|--------------------|---------------|--------------|-------------|-------------|
| ENSMUSG00000032193 | Ldlr          | -0.270146918 | 0.030207022 | 0.171132331 |
| ENSMUSG00000036833 | Pnpla7        | -0.279128342 | 0.030240264 | 0.171200694 |
| ENSMUSG00000024826 | Dpf2          | -0.297752357 | 0.030307    | 0.171500341 |
| ENSMUSG00000037685 | Atp8a1        | 0.25976064   | 0.030349507 | 0.171662669 |
| ENSMUSG00000002820 | Atg4d         | -0.265686445 | 0.030400975 | 0.171719197 |
| ENSMUSG00000023882 | Zfp54         | -0.288313493 | 0.030376448 | 0.171719197 |
| ENSMUSG00000038379 | Ttk           | -0.220527727 | 0.030389634 | 0.171719197 |
| ENSMUSG00000015461 | Atf6b         | -0.28967662  | 0.030468032 | 0.171941584 |
| ENSMUSG00000019158 | Tmem160       | 0.175579992  | 0.030466547 | 0.171941584 |
| ENSMUSG00000034427 | Myo15b        | 0.09708245   | 0.030521973 | 0.171968247 |
| ENSMUSG00000034432 | Cops8         | 0.183861525  | 0.0305036   | 0.171968247 |
| ENSMUSG00000057278 | Snrpg         | 0.242033634  | 0.030511865 | 0.171968247 |
| ENSMUSG00000062729 | Ppox          | -0.246603623 | 0.030528137 | 0.171968247 |
| ENSMUSG00000002413 | Braf          | -0.247793295 | 0.030564722 | 0.172007696 |
| ENSMUSG00000038145 | Snrk          | -0.277610189 | 0.030576684 | 0.172007696 |
| ENSMUSG00000097711 | Gm5523        | 0.099114196  | 0.030568113 | 0.172007696 |
| ENSMUSG00000003526 | Prodh         | 0.222837263  | 0.030670621 | 0.172392476 |
| ENSMUSG00000031367 | Ap1s2         | -0.231651584 | 0.030672842 | 0.172392476 |
| ENSMUSG00000008206 | Cers4         | -0.288336238 | 0.030783409 | 0.172897211 |
| ENSMUSG00000034210 | Efcab14       | -0.247245409 | 0.030790486 | 0.172897211 |
| ENSMUSG00000031701 | Dnaja2        | 0.221606869  | 0.030825831 | 0.173017462 |
| ENSMUSG00000091845 | Rpl36-ps12    | 0.273908856  | 0.030933615 | 0.173544009 |
| ENSMUSG00000027751 | Supt20        | -0.205420932 | 0.031068254 | 0.174220672 |
| ENSMUSG00000015176 | Nolc1         | 0.21630698   | 0.031157048 | 0.174639753 |
| ENSMUSG00000051615 | Rap2a         | -0.268629785 | 0.03123944  | 0.175022591 |
| ENSMUSG00000059146 | Ntrk3         | -0.055635064 | 0.031329801 | 0.175449709 |
| ENSMUSG00000025871 | 4833439L19Rik | -0.222155376 | 0.031350737 | 0.175486953 |
| ENSMUSG00000030678 | Maz           | -0.282166336 | 0.031364708 | 0.175486953 |
| ENSMUSG00000019952 | Poc1b         | -0.269710154 | 0.031401166 | 0.175532803 |
| ENSMUSG00000063480 | Snu13         | 0.200053939  | 0.031391385 | 0.175532803 |
| ENSMUSG00000024121 | Atp6v0c       | 0.220210991  | 0.031468673 | 0.175831031 |
| ENSMUSG00000027523 | Gnas          | -0.279717155 | 0.031543388 | 0.175982718 |
| ENSMUSG00000027556 | Car1          | 0.243826706  | 0.031566661 | 0.175982718 |
| ENSMUSG00000030126 | Tmcc1         | -0.244525269 | 0.031521571 | 0.175982718 |
| ENSMUSG00000039853 | Trim14        | -0.253929906 | 0.031539585 | 0.175982718 |
| ENSMUSG00000050854 | Tmem125       | -0.053606949 | 0.03155459  | 0.175982718 |
| ENSMUSG00000026600 | Soat1         | -0.228224823 | 0.03161803  | 0.176190021 |
| ENSMUSG00000028549 | Itgb3bp       | -0.243783781 | 0.031681045 | 0.176461999 |
| ENSMUSG00000071291 | Zfp58         | -0.272723977 | 0.031727539 | 0.176641759 |
| ENSMUSG00000021453 | Gadd45g       | 0.288650838  | 0.031754728 | 0.176713924 |
| ENSMUSG00000022849 | Hspbap1       | 0.240814289  | 0.031786407 | 0.176810998 |
| ENSMUSG00000001280 | Sp1           | -0.061757001 | 0.031869227 | 0.176840005 |
| ENSMUSG00000015656 | Hspa8         | -0.267399937 | 0.031837051 | 0.176840005 |

|                    |               |              |             |             |
|--------------------|---------------|--------------|-------------|-------------|
| ENSMUSG00000029401 | Rilpl2        | 0.243060034  | 0.031917441 | 0.176840005 |
| ENSMUSG00000038188 | Scarf1        | -0.273968377 | 0.031919756 | 0.176840005 |
| ENSMUSG00000043284 | Tmem11        | 0.188813933  | 0.031862059 | 0.176840005 |
| ENSMUSG00000045795 | Whamm         | -0.282590013 | 0.031886906 | 0.176840005 |
| ENSMUSG00000054079 | Utp18         | 0.20611803   | 0.03182569  | 0.176840005 |
| ENSMUSG00000055932 | Fto           | -0.280270977 | 0.031857115 | 0.176840005 |
| ENSMUSG00000110315 | Gm8423        | 0.147769105  | 0.031906794 | 0.176840005 |
| ENSMUSG00000000562 | Adora3        | -0.257961522 | 0.031935081 | 0.176846029 |
| ENSMUSG00000026374 | Tsn           | 0.224810797  | 0.031957544 | 0.176891556 |
| ENSMUSG00000029432 | Nipsnap2      | -0.282845917 | 0.031989639 | 0.176990335 |
| ENSMUSG00000017485 | Top2b         | 0.25044333   | 0.032030231 | 0.177136022 |
| ENSMUSG00000030824 | Nucb1         | -0.243889902 | 0.03210012  | 0.17736833  |
| ENSMUSG00000036879 | Phkb          | 0.214450526  | 0.032100798 | 0.17736833  |
| ENSMUSG00000048787 | Dcun1d3       | -0.191749244 | 0.032127724 | 0.177438177 |
| ENSMUSG00000030452 | Nipa2         | 0.210889126  | 0.032179109 | 0.177642981 |
| ENSMUSG00000022234 | Cct5          | 0.193231869  | 0.032222388 | 0.177723927 |
| ENSMUSG00000029516 | Cit           | -0.278851039 | 0.032212945 | 0.177723927 |
| ENSMUSG00000045257 | Morn2         | 0.277680549  | 0.032268293 | 0.17789812  |
| ENSMUSG00000091269 | Gm6682        | 0.145459744  | 0.032283355 | 0.177902199 |
| ENSMUSG00000021905 | Dph3          | 0.202543833  | 0.032346167 | 0.178169284 |
| ENSMUSG00000032513 | Gorasp1       | -0.265914735 | 0.032387863 | 0.178240872 |
| ENSMUSG00000044496 | 2510039O18Rik | -0.252751217 | 0.032376769 | 0.178240872 |
| ENSMUSG00000059866 | Tnip2         | -0.264938766 | 0.032403157 | 0.178246063 |
| ENSMUSG00000091971 | Hspa1a        | -0.093661214 | 0.032457235 | 0.178464504 |
| ENSMUSG00000116782 | Gm46562       | 0.197417807  | 0.032471673 | 0.178464887 |
| ENSMUSG00000019470 | Xab2          | -0.26100875  | 0.03249669  | 0.178523389 |
| ENSMUSG00000040550 | Otud6b        | 0.252367521  | 0.032517357 | 0.178557952 |
| ENSMUSG00000073702 | Rpl31         | 0.237178651  | 0.03255637  | 0.17869318  |
| ENSMUSG00000025173 | Wdr45b        | -0.226852137 | 0.032613571 | 0.178899338 |
| ENSMUSG00000027668 | Mfn1          | -0.23661783  | 0.032631539 | 0.178899338 |
| ENSMUSG00000039209 | Rpl39l        | 0.069055455  | 0.032651542 | 0.178899338 |
| ENSMUSG00000098188 | Sowahc        | -0.276606591 | 0.032647866 | 0.178899338 |
| ENSMUSG00000070808 | Bicra         | -0.283982342 | 0.03269025  | 0.179032449 |
| ENSMUSG00000036381 | P2ry14        | -0.170230036 | 0.032717956 | 0.179105212 |
| ENSMUSG00000018909 | Arrb1         | -0.270283036 | 0.032749723 | 0.179200138 |
| ENSMUSG00000026313 | Hdac4         | -0.277154858 | 0.032834119 | 0.179345907 |
| ENSMUSG00000029875 | Ccdc184       | 0.273503938  | 0.03283038  | 0.179345907 |
| ENSMUSG00000040188 | Scamp2        | -0.194171645 | 0.032812269 | 0.179345907 |
| ENSMUSG00000074342 | I830077J02Rik | -0.281958599 | 0.032821113 | 0.179345907 |
| ENSMUSG00000070705 | Eid2b         | -0.283824863 | 0.032862058 | 0.179394702 |
| ENSMUSG00000085682 | Gm14267       | 0.168894026  | 0.032871938 | 0.179394702 |
| ENSMUSG00000020419 | Hormad2       | -0.119309106 | 0.032989259 | 0.179955899 |
| ENSMUSG00000027342 | Pcna          | 0.192345472  | 0.033144158 | 0.180642204 |

|                    |          |              |             |             |
|--------------------|----------|--------------|-------------|-------------|
| ENSMUSG00000044894 | Uqcrq    | 0.215549781  | 0.0331435   | 0.180642204 |
| ENSMUSG00000090213 | Tmem189  | -0.242626031 | 0.033192337 | 0.180746175 |
| ENSMUSG00000090523 | Gypc     | -0.252562782 | 0.033181511 | 0.180746175 |
| ENSMUSG00000023055 | Calcoco1 | -0.197709772 | 0.033390602 | 0.181746128 |
| ENSMUSG00000038467 | Chmp4b   | 0.240531792  | 0.033447279 | 0.181974881 |
| ENSMUSG00000025225 | Nfkb2    | -0.278677243 | 0.033481648 | 0.182082117 |
| ENSMUSG00000089917 | Uckl1    | -0.188137285 | 0.033529343 | 0.182261694 |
| ENSMUSG00000002308 | Cd320    | 0.21064753   | 0.0335676   | 0.182389833 |
| ENSMUSG00000022362 | Gm29394  | 0.277684453  | 0.033632107 | 0.182643293 |
| ENSMUSG00000074280 | Gm6166   | 0.278167758  | 0.033643656 | 0.182643293 |
| ENSMUSG00000114277 | Gm48583  | 0.267537208  | 0.033665876 | 0.182684073 |
| ENSMUSG00000020650 | Bcap29   | 0.251686587  | 0.033720547 | 0.182754574 |
| ENSMUSG00000029246 | Ppat     | 0.201631738  | 0.033722145 | 0.182754574 |
| ENSMUSG00000031207 | Msn      | -0.221397568 | 0.033723008 | 0.182754574 |
| ENSMUSG00000003032 | Klf4     | -0.261118239 | 0.033739059 | 0.182761817 |
| ENSMUSG00000020973 | Dnaaf2   | -0.208016327 | 0.033842293 | 0.183032719 |
| ENSMUSG00000038533 | Cbfa2t2  | -0.27591739  | 0.033805934 | 0.183032719 |
| ENSMUSG00000050271 | Prag1    | 0.199878469  | 0.033862748 | 0.183032719 |
| ENSMUSG00000055805 | Fmnl1    | -0.278195232 | 0.033826554 | 0.183032719 |
| ENSMUSG00000081485 | Gm12338  | 0.208967331  | 0.033850475 | 0.183032719 |
| ENSMUSG00000113450 | Gm49359  | -0.25496496  | 0.033922128 | 0.183273923 |
| ENSMUSG00000020149 | Rab1a    | 0.153188196  | 0.033973141 | 0.183389999 |
| ENSMUSG00000052406 | Rexo4    | -0.194726765 | 0.033961169 | 0.183389999 |
| ENSMUSG00000015126 | Tsr3     | 0.179339031  | 0.034073544 | 0.183852081 |
| ENSMUSG00000028175 | Depdc1a  | -0.229211368 | 0.034097981 | 0.18390405  |
| ENSMUSG00000041236 | Vps41    | -0.230430248 | 0.034143239 | 0.184068215 |
| ENSMUSG00000037509 | Arhgef4  | -0.27315444  | 0.034211427 | 0.184275858 |
| ENSMUSG00000082838 | Gm14519  | -0.275809336 | 0.034209076 | 0.184275858 |
| ENSMUSG00000029552 | Tes      | 0.2709188    | 0.03423823  | 0.184340293 |
| ENSMUSG00000026223 | Itm2c    | -0.263776427 | 0.034258268 | 0.184368259 |
| ENSMUSG00000002763 | Pex6     | -0.264274548 | 0.034337804 | 0.184716267 |
| ENSMUSG00000004996 | Mri1     | 0.217983942  | 0.034451819 | 0.185249372 |
| ENSMUSG00000040229 | Gpr34    | -0.148579105 | 0.034475582 | 0.185296931 |
| ENSMUSG00000026017 | Carf     | -0.263147975 | 0.034514521 | 0.185425981 |
| ENSMUSG00000049657 | Zbtb5    | -0.27474542  | 0.034572462 | 0.185630443 |
| ENSMUSG00000060181 | Slc35e3  | -0.268013068 | 0.034582469 | 0.185630443 |
| ENSMUSG00000024537 | Psmg2    | 0.201855062  | 0.034663487 | 0.185904651 |
| ENSMUSG00000049588 | Ccdc69   | -0.238054716 | 0.034649015 | 0.185904651 |
| ENSMUSG00000021282 | Eif5     | 0.242336254  | 0.034722595 | 0.186096267 |
| ENSMUSG00000025451 | Paip1    | 0.231635937  | 0.034744163 | 0.186096267 |
| ENSMUSG00000033166 | Dis3     | 0.284060833  | 0.034736098 | 0.186096267 |
| ENSMUSG00000025780 | Itih5    | 0.268804647  | 0.034816676 | 0.186163555 |
| ENSMUSG00000034075 | Zdhhc5   | 0.268433957  | 0.034811836 | 0.186163555 |

|                    |               |              |             |             |
|--------------------|---------------|--------------|-------------|-------------|
| ENSMUSG00000049624 | Slc17a5       | -0.24090162  | 0.034784508 | 0.186163555 |
| ENSMUSG00000083161 | Gm11427       | 0.173859335  | 0.03480514  | 0.186163555 |
| ENSMUSG00000014294 | Ndufa2        | 0.173312906  | 0.034846485 | 0.186242767 |
| ENSMUSG00000094942 | Gm3604        | -0.266105656 | 0.03490402  | 0.186470035 |
| ENSMUSG00000029086 | Prom1         | 0.272411085  | 0.034945317 | 0.186573553 |
| ENSMUSG00000030727 | Rabep2        | -0.242258214 | 0.034953438 | 0.186573553 |
| ENSMUSG00000004945 | Tmem242       | 0.22021484   | 0.035057864 | 0.187050571 |
| ENSMUSG00000004105 | Angptl2       | -0.125033704 | 0.03511839  | 0.187293052 |
| ENSMUSG00000044330 | Gm9790        | 0.217627269  | 0.035160775 | 0.187327996 |
| ENSMUSG00000079283 | 2310009B15Rik | 0.259681078  | 0.035170187 | 0.187327996 |
| ENSMUSG00000082691 | Dynlt1-ps1    | 0.176493818  | 0.035159489 | 0.187327996 |
| ENSMUSG00000037419 | Endod1        | 0.273940965  | 0.035322443 | 0.188058321 |
| ENSMUSG00000051495 | Irf2bp2       | -0.241979625 | 0.035419095 | 0.188492108 |
| ENSMUSG00000024383 | Map3k2        | -0.237680003 | 0.035435158 | 0.188496828 |
| ENSMUSG00000019897 | Ccdc59        | 0.198343792  | 0.035488773 | 0.188701219 |
| ENSMUSG00000011958 | Bnip2         | 0.16883957   | 0.035539029 | 0.18872607  |
| ENSMUSG00000025920 | Stau2         | 0.270310019  | 0.035533286 | 0.18872607  |
| ENSMUSG00000029998 | Pcyox1        | -0.20122639  | 0.035535866 | 0.18872607  |
| ENSMUSG00000024948 | Map4k2        | -0.240527833 | 0.035607987 | 0.189011457 |
| ENSMUSG00000033107 | Rnf125        | 0.213535785  | 0.03567755  | 0.189218978 |
| ENSMUSG00000057561 | Eif1a         | 0.206945534  | 0.035670351 | 0.189218978 |
| ENSMUSG00000036504 | Phpt1         | 0.194810106  | 0.035700108 | 0.189257807 |
| ENSMUSG00000030323 | Ift122        | -0.226578294 | 0.035738339 | 0.189298895 |
| ENSMUSG00000036882 | Arhgap33      | -0.116080781 | 0.035725875 | 0.189298895 |
| ENSMUSG00000020476 | Dbnl          | -0.247855703 | 0.035782192 | 0.189369668 |
| ENSMUSG00000040479 | Dgkz          | -0.256945539 | 0.035776852 | 0.189369668 |
| ENSMUSG00000074182 | Znhit6        | 0.217856615  | 0.035807956 | 0.189425309 |
| ENSMUSG00000079242 | C730034F03Rik | -0.268240734 | 0.035831063 | 0.189466849 |
| ENSMUSG00000022100 | Xpo7          | -0.269411556 | 0.035890141 | 0.189617796 |
| ENSMUSG00000039656 | Rxbp1         | -0.263903117 | 0.035885236 | 0.189617796 |
| ENSMUSG00000019295 | Tmem129       | -0.207492017 | 0.036009549 | 0.190138177 |
| ENSMUSG00000092281 | Hmgb1-ps7     | 0.166042856  | 0.036019252 | 0.190138177 |
| ENSMUSG00000070738 | Dgkd          | -0.230921007 | 0.036285775 | 0.191463727 |
| ENSMUSG00000031532 | Saraf         | -0.186063204 | 0.036322928 | 0.191578379 |
| ENSMUSG00000031613 | Hpgd          | 0.102996563  | 0.036359029 | 0.191687391 |
| ENSMUSG00000021607 | Mrpl36        | 0.18970106   | 0.036410759 | 0.191797304 |
| ENSMUSG00000039952 | Dag1          | -0.252329184 | 0.036398057 | 0.191797304 |
| ENSMUSG00000027907 | S100a11       | 0.268785978  | 0.036529235 | 0.192320052 |
| ENSMUSG00000029136 | Rbks          | 0.21707533   | 0.036552259 | 0.192320052 |
| ENSMUSG00000046456 | Tmem150b      | -0.261757644 | 0.036556448 | 0.192320052 |
| ENSMUSG00000018167 | Stard3        | -0.23382304  | 0.036597774 | 0.19245595  |
| ENSMUSG00000031299 | Pdha1         | 0.18065094   | 0.036649414 | 0.192645949 |
| ENSMUSG00000083780 | Gm12728       | 0.145064403  | 0.036803303 | 0.193373024 |

|                     |         |              |             |             |
|---------------------|---------|--------------|-------------|-------------|
| ENSMUSG00000003299  | Mrpl4   | 0.161284791  | 0.03683234  | 0.19344376  |
| ENSMUSG000000057522 | Spop    | -0.205054989 | 0.036867019 | 0.19354406  |
| ENSMUSG000000033075 | Senp1   | -0.201845362 | 0.036916013 | 0.193631242 |
| ENSMUSG000000035776 | Cd99l2  | -0.229808031 | 0.036929557 | 0.193631242 |
| ENSMUSG000000054717 | Hmgb2   | 0.211708087  | 0.036930393 | 0.193631242 |
| ENSMUSG000000026283 | Ing5    | 0.221576762  | 0.036986035 | 0.193841157 |
| ENSMUSG000000002565 | Scin    | -0.16617766  | 0.037116036 | 0.194085019 |
| ENSMUSG000000006494 | Pdk1    | 0.235567577  | 0.037121699 | 0.194085019 |
| ENSMUSG000000027349 | Fam98b  | 0.209441035  | 0.037101318 | 0.194085019 |
| ENSMUSG000000040532 | Abhd11  | 0.207656581  | 0.03709139  | 0.194085019 |
| ENSMUSG000000089999 | Gm6485  | 0.264390304  | 0.037126319 | 0.194085019 |
| ENSMUSG000000100679 | Gm28778 | 0.1809903    | 0.037084418 | 0.194085019 |
| ENSMUSG000000018907 | Alox12e | -0.115640365 | 0.037152565 | 0.194140517 |
| ENSMUSG000000021116 | Eif2s1  | 0.205284786  | 0.037206016 | 0.19418471  |
| ENSMUSG000000030541 | Idh2    | 0.200537097  | 0.037210459 | 0.19418471  |
| ENSMUSG000000032870 | Smap2   | -0.264067271 | 0.037223557 | 0.19418471  |
| ENSMUSG000000044857 | Lemd2   | -0.229430733 | 0.037176965 | 0.19418471  |
| ENSMUSG000000040723 | Rcsd1   | -0.206641557 | 0.037249386 | 0.194237875 |
| ENSMUSG000000028101 | Pias3   | -0.18251668  | 0.037312944 | 0.194487656 |
| ENSMUSG000000009575 | Cbx5    | 0.269315689  | 0.037403646 | 0.194878644 |
| ENSMUSG000000037275 | Gemin5  | 0.255160085  | 0.037459028 | 0.194931829 |
| ENSMUSG000000074272 | Ceacam1 | -0.235526036 | 0.037433691 | 0.194931829 |
| ENSMUSG000000097148 | Gm3839  | 0.148746979  | 0.037460935 | 0.194931829 |
| ENSMUSG000000025289 | Prdx4   | -0.253165034 | 0.03748205  | 0.194960029 |
| ENSMUSG000000021661 | Ankra2  | -0.202450275 | 0.037516709 | 0.194977007 |
| ENSMUSG000000074743 | Thbd    | -0.26814286  | 0.0375051   | 0.194977007 |
| ENSMUSG000000020612 | Prkar1a | 0.219209545  | 0.037564614 | 0.195062738 |
| ENSMUSG000000067288 | Rps28   | 0.222201715  | 0.037551792 | 0.195062738 |
| ENSMUSG000000041268 | Dmxd2   | 0.249177853  | 0.037582265 | 0.195072845 |
| ENSMUSG000000025804 | Ccr1    | -0.216818641 | 0.037674137 | 0.195468026 |
| ENSMUSG000000101932 | Gm10074 | 0.23318238   | 0.037722083 | 0.195635071 |
| ENSMUSG000000028234 | Rps20   | 0.232272971  | 0.037767626 | 0.195789516 |
| ENSMUSG000000073902 | Gm1966  | 0.26791638   | 0.037811216 | 0.195905466 |
| ENSMUSG000000093484 | Gm20657 | 0.251975927  | 0.037821537 | 0.195905466 |
| ENSMUSG000000067586 | S1pr3   | -0.2608942   | 0.037938487 | 0.196429322 |
| ENSMUSG000000034192 | Lsm3    | 0.165254695  | 0.037975846 | 0.19645897  |
| ENSMUSG000000054808 | Actn4   | -0.265509314 | 0.037969094 | 0.19645897  |
| ENSMUSG000000082674 | Gm11914 | 0.221490948  | 0.038011214 | 0.19656007  |
| ENSMUSG000000031976 | Urb2    | 0.253392091  | 0.038034289 | 0.196597549 |
| ENSMUSG000000001844 | Zdhhc4  | 0.167692425  | 0.038143691 | 0.196671976 |
| ENSMUSG000000017837 | Nkiras2 | -0.223524607 | 0.038140295 | 0.196671976 |
| ENSMUSG000000019808 | Adat2   | 0.243463845  | 0.038109136 | 0.196671976 |
| ENSMUSG000000034612 | Chst11  | 0.155231833  | 0.038108757 | 0.196671976 |

|                    |          |              |             |             |
|--------------------|----------|--------------|-------------|-------------|
| ENSMUSG00000068566 | Myadm    | -0.195531957 | 0.038098496 | 0.196671976 |
| ENSMUSG00000106755 | Tpi-rs11 | 0.264369371  | 0.038114343 | 0.196671976 |
| ENSMUSG00000034744 | Nagk     | -0.225062417 | 0.038211631 | 0.196940526 |
| ENSMUSG00000003484 | Cyp4f18  | -0.264833384 | 0.038247753 | 0.197044934 |
| ENSMUSG00000033701 | Acbd6    | 0.196296345  | 0.038294129 | 0.197202061 |
| ENSMUSG00000033545 | Znrf1    | -0.233229352 | 0.038362575 | 0.197472666 |
| ENSMUSG00000035847 | Ids      | -0.14416613  | 0.038436778 | 0.197556066 |
| ENSMUSG00000039016 | Timm8b   | 0.172209542  | 0.038414576 | 0.197556066 |
| ENSMUSG00000067106 | Gm5529   | 0.20830257   | 0.038442397 | 0.197556066 |
| ENSMUSG00000078134 | Gm12355  | 0.256269244  | 0.038426983 | 0.197556066 |
| ENSMUSG00000024675 | Ms4a4c   | -0.261425241 | 0.038496019 | 0.197749814 |
| ENSMUSG00000036777 | Anln     | -0.224813861 | 0.038579493 | 0.198096685 |
| ENSMUSG00000028028 | Alpk1    | -0.25345729  | 0.038645682 | 0.198354553 |
| ENSMUSG00000051234 | Rnf7     | 0.188950542  | 0.038669727 | 0.198395984 |
| ENSMUSG00000085371 | Gm3160   | 0.122115217  | 0.038743184 | 0.198690786 |
| ENSMUSG00000000149 | Gna12    | -0.246981138 | 0.038796837 | 0.198757302 |
| ENSMUSG00000022808 | Snx4     | 0.202957706  | 0.038780921 | 0.198757302 |
| ENSMUSG00000025893 | Kbtbd3   | -0.238937598 | 0.038804159 | 0.198757302 |
| ENSMUSG00000023048 | Prr13    | -0.257413602 | 0.038889456 | 0.19911209  |
| ENSMUSG00000076441 | Ass1     | -0.212193587 | 0.038960359 | 0.199392922 |
| ENSMUSG00000004085 | Map3k20  | -0.253990357 | 0.03903436  | 0.19947057  |
| ENSMUSG00000030876 | Mettl9   | 0.20346988   | 0.039012644 | 0.19947057  |
| ENSMUSG00000038534 | Osbpl7   | -0.256914167 | 0.039055027 | 0.19947057  |
| ENSMUSG00000045404 | Kcnk13   | 0.176307339  | 0.039055827 | 0.19947057  |
| ENSMUSG00000079426 | Arpc4    | 0.153747527  | 0.039050739 | 0.19947057  |
| ENSMUSG00000018809 | Smyd4    | -0.257973579 | 0.039185971 | 0.200009464 |
| ENSMUSG00000026014 | Raph1    | -0.260901982 | 0.039206677 | 0.200009464 |
| ENSMUSG00000039315 | Clnk     | 0.125468346  | 0.039209649 | 0.200009464 |
| ENSMUSG00000053101 | Gpr141   | -0.212050528 | 0.03924393  | 0.200102158 |
| ENSMUSG00000032415 | Ube2cbp  | 0.262944549  | 0.03929291  | 0.200269693 |
| ENSMUSG00000009905 | Kdsr     | 0.26014896   | 0.039463231 | 0.200561699 |
| ENSMUSG00000012123 | Crybg2   | 0.212721915  | 0.039453071 | 0.200561699 |
| ENSMUSG00000019782 | Rwdd1    | 0.166568131  | 0.039436016 | 0.200561699 |
| ENSMUSG00000020260 | Pofut2   | -0.232627569 | 0.039452845 | 0.200561699 |
| ENSMUSG00000031993 | Snx19    | -0.26152765  | 0.039387835 | 0.200561699 |
| ENSMUSG00000036565 | Ttyh3    | -0.261875113 | 0.039402312 | 0.200561699 |
| ENSMUSG00000059248 | Sept9    | -0.239898002 | 0.039415962 | 0.200561699 |
| ENSMUSG00000031392 | Irak1    | -0.250223411 | 0.039481624 | 0.200573109 |
| ENSMUSG00000075700 | Selenot  | 0.219623009  | 0.039569491 | 0.200937307 |
| ENSMUSG00000028221 | Pip4p2   | 0.187098877  | 0.039622849 | 0.201043874 |
| ENSMUSG00000083676 | Gm11367  | 0.222643886  | 0.039621432 | 0.201043874 |
| ENSMUSG00000020477 | Mrps24   | 0.200409177  | 0.039693192 | 0.201236382 |
| ENSMUSG00000060727 | Gm12571  | 0.196705913  | 0.039692462 | 0.201236382 |

|                    |          |              |             |             |
|--------------------|----------|--------------|-------------|-------------|
| ENSMUSG0000000134  | Tfe3     | -0.20649917  | 0.039786786 | 0.201628587 |
| ENSMUSG00000053436 | Mapk14   | -0.237258505 | 0.039817818 | 0.201703555 |
| ENSMUSG00000001016 | Ilf2     | 0.168302643  | 0.039923126 | 0.201819085 |
| ENSMUSG00000003134 | Tbc1d8   | -0.243702536 | 0.039992481 | 0.201819085 |
| ENSMUSG00000021076 | Actr10   | 0.23867128   | 0.040003107 | 0.201819085 |
| ENSMUSG00000022098 | Bmp1     | -0.077980262 | 0.039983917 | 0.201819085 |
| ENSMUSG00000033917 | Gde1     | 0.186145971  | 0.039893906 | 0.201819085 |
| ENSMUSG00000034807 | Colgalt1 | -0.219698407 | 0.039970582 | 0.201819085 |
| ENSMUSG00000050608 | Minos1   | 0.2129594    | 0.039943734 | 0.201819085 |
| ENSMUSG00000073733 | Rsg1     | -0.259234718 | 0.039896741 | 0.201819085 |
| ENSMUSG00000092257 | Gm2308   | 0.118861391  | 0.039879055 | 0.201819085 |
| ENSMUSG00000096544 | Gm4617   | 0.23941155   | 0.039923033 | 0.201819085 |
| ENSMUSG00000022677 | Fopnl    | 0.167295324  | 0.040062127 | 0.202034785 |
| ENSMUSG00000099835 | Gm29668  | 0.259146933  | 0.04008429  | 0.202064517 |
| ENSMUSG00000071172 | Srsf3    | 0.18555446   | 0.040132709 | 0.202226525 |
| ENSMUSG00000026858 | Miga2    | -0.199963109 | 0.04016859  | 0.202325244 |
| ENSMUSG00000022748 | Cmss1    | 0.201207019  | 0.040269358 | 0.202632657 |
| ENSMUSG00000038622 | Med30    | 0.198719907  | 0.040258654 | 0.202632657 |
| ENSMUSG00000043289 | Mei4     | 0.224881978  | 0.040278563 | 0.202632657 |
| ENSMUSG00000029253 | Cenpc1   | -0.187874492 | 0.040321091 | 0.202764482 |
| ENSMUSG00000033128 | Gga1     | -0.251708146 | 0.040391286 | 0.203035272 |
| ENSMUSG00000061306 | Slc38a10 | -0.244720966 | 0.040441726 | 0.203206585 |
| ENSMUSG00000067212 | H2-T23   | -0.158029617 | 0.040501956 | 0.203426928 |
| ENSMUSG00000059555 | Tor4a    | -0.237009786 | 0.040569145 | 0.203682032 |
| ENSMUSG00000009566 | Fpgs     | -0.236801131 | 0.040674212 | 0.203909374 |
| ENSMUSG00000024925 | Rnaseh2c | 0.170581686  | 0.040641034 | 0.203909374 |
| ENSMUSG00000058655 | Eif4b    | 0.258331104  | 0.040663476 | 0.203909374 |
| ENSMUSG00000072582 | Ptrh2    | 0.171409502  | 0.040680093 | 0.203909374 |
| ENSMUSG00000027834 | Serpini1 | -0.256315508 | 0.040879273 | 0.204577538 |
| ENSMUSG00000028245 | Nsmaf    | -0.247199689 | 0.040875616 | 0.204577538 |
| ENSMUSG00000034118 | Tpst1    | -0.256955181 | 0.040849938 | 0.204577538 |
| ENSMUSG00000078931 | Pdf      | 0.196549415  | 0.040874184 | 0.204577538 |
| ENSMUSG00000052384 | Nrros    | -0.260784951 | 0.040919237 | 0.204695061 |
| ENSMUSG00000031928 | Mre11a   | -0.201753995 | 0.040936212 | 0.204697538 |
| ENSMUSG00000083626 | Gm4459   | 0.212719264  | 0.040973041 | 0.204799253 |
| ENSMUSG00000025730 | Rab40c   | -0.255503427 | 0.041056825 | 0.204901527 |
| ENSMUSG00000028329 | Xpa      | 0.24211765   | 0.041077492 | 0.204901527 |
| ENSMUSG00000033918 | Parl     | 0.218633353  | 0.041089469 | 0.204901527 |
| ENSMUSG00000066800 | Rnasel   | 0.258578837  | 0.041092481 | 0.204901527 |
| ENSMUSG00000066892 | Fbxl12   | -0.243420305 | 0.041013495 | 0.204901527 |
| ENSMUSG00000068262 | Gm5879   | 0.105711593  | 0.041070741 | 0.204901527 |
| ENSMUSG00000021374 | Nup153   | 0.256954745  | 0.041115648 | 0.204934778 |
| ENSMUSG00000029135 | Fosl2    | -0.252036042 | 0.041341644 | 0.205978563 |

|                    |               |              |             |             |
|--------------------|---------------|--------------|-------------|-------------|
| ENSMUSG00000082127 | Gm13577       | 0.201707492  | 0.041477647 | 0.206573317 |
| ENSMUSG00000030830 | Itgal         | -0.25461938  | 0.04149824  | 0.20659304  |
| ENSMUSG00000057580 | Gm10012       | 0.224007133  | 0.041540852 | 0.206722324 |
| ENSMUSG00000008373 | Prpf31        | 0.181085408  | 0.041601112 | 0.206773675 |
| ENSMUSG00000018923 | Med11         | 0.237755107  | 0.041593962 | 0.206773675 |
| ENSMUSG00000074916 | Chst14        | -0.255091009 | 0.04158064  | 0.206773675 |
| ENSMUSG00000000384 | Tbrg4         | -0.255870866 | 0.041650927 | 0.206785008 |
| ENSMUSG00000017713 | Tha1          | -0.233814775 | 0.041631773 | 0.206785008 |
| ENSMUSG00000024301 | Kifc5b        | -0.243034731 | 0.041653336 | 0.206785008 |
| ENSMUSG00000050705 | 2310061I04Rik | -0.199540092 | 0.041677151 | 0.206820572 |
| ENSMUSG00000018547 | Pip4k2b       | -0.149930943 | 0.041721936 | 0.20687751  |
| ENSMUSG00000033819 | Ppp1r16a      | -0.234348354 | 0.041718696 | 0.20687751  |
| ENSMUSG00000032293 | Ireb2         | 0.219790743  | 0.041779681 | 0.207059505 |
| ENSMUSG00000038280 | Ostm1         | -0.178244349 | 0.04179198  | 0.207059505 |
| ENSMUSG00000060427 | Zfp868        | -0.247825512 | 0.041856971 | 0.207298817 |
| ENSMUSG00000095648 | Gm2004        | 0.135582946  | 0.041897917 | 0.207418901 |
| ENSMUSG00000030417 | Pdcd5         | 0.214655874  | 0.04196101  | 0.207648489 |
| ENSMUSG00000032788 | Pdxk          | 0.208188753  | 0.041978508 | 0.207652351 |
| ENSMUSG00000058594 | Fbh1          | -0.219265233 | 0.042029667 | 0.207822647 |
| ENSMUSG00000064068 | Mtx1          | 0.21147432   | 0.04210767  | 0.208125495 |
| ENSMUSG00000029073 | Cptp          | -0.223500014 | 0.042126622 | 0.208136345 |
| ENSMUSG00000031591 | Asah1         | -0.202126529 | 0.042150715 | 0.208172577 |
| ENSMUSG00000006673 | Qrich1        | -0.204713313 | 0.042226504 | 0.208457143 |
| ENSMUSG00000067653 | Ankrd23       | -0.175798846 | 0.042258682 | 0.208457143 |
| ENSMUSG00000091123 | Gm17181       | 0.254736065  | 0.042258547 | 0.208457143 |
| ENSMUSG00000029198 | Grpel1        | 0.208034793  | 0.042278399 | 0.208471615 |
| ENSMUSG00000027968 | Larp7         | 0.228077736  | 0.042358391 | 0.208715635 |
| ENSMUSG00000095325 | Zfp870        | -0.229482248 | 0.042361494 | 0.208715635 |
| ENSMUSG00000033055 | Ankrd54       | -0.218305538 | 0.042453747 | 0.209087227 |
| ENSMUSG00000001751 | Naglu         | -0.25179154  | 0.042496921 | 0.209134014 |
| ENSMUSG00000086240 | Gm7846        | 0.206904526  | 0.042494343 | 0.209134014 |
| ENSMUSG00000078886 | Gm2026        | 0.006653881  | 0.042518263 | 0.209156175 |
| ENSMUSG00000028648 | Ndufs5        | 0.194053019  | 0.042563958 | 0.209298067 |
| ENSMUSG00000030327 | Necap1        | -0.216416084 | 0.042672005 | 0.20974633  |
| ENSMUSG00000022811 | Zfp148        | -0.231297414 | 0.042719647 | 0.209814449 |
| ENSMUSG00000046688 | Tifa          | -0.238152121 | 0.042705845 | 0.209814449 |
| ENSMUSG00000021993 | Mipep         | 0.200454377  | 0.042747021 | 0.209865907 |
| ENSMUSG00000054720 | Lrrc8c        | -0.25051144  | 0.042876136 | 0.210416626 |
| ENSMUSG00000030096 | Slc6a6        | 0.204362542  | 0.042954849 | 0.210719661 |
| ENSMUSG00000026627 | Tmem206       | -0.227253574 | 0.043004131 | 0.210878132 |
| ENSMUSG00000028394 | Pole3         | 0.224117383  | 0.043073056 | 0.211093525 |
| ENSMUSG00000033434 | Gtpbp6        | -0.252217197 | 0.043088097 | 0.211093525 |
| ENSMUSG00000041115 | lqsec2        | -0.240675032 | 0.04309904  | 0.211093525 |

|                    |          |              |             |             |
|--------------------|----------|--------------|-------------|-------------|
| ENSMUSG00000031641 | Cbr4     | 0.234713261  | 0.043164517 | 0.211309897 |
| ENSMUSG00000075415 | Fnbp1    | -0.250518256 | 0.043177242 | 0.211309897 |
| ENSMUSG00000019851 | Perp     | -0.184394521 | 0.043246242 | 0.211314543 |
| ENSMUSG00000027787 | Nmd3     | 0.233235305  | 0.043198348 | 0.211314543 |
| ENSMUSG00000050428 | Fbxo46   | -0.251667763 | 0.043215812 | 0.211314543 |
| ENSMUSG00000067719 | Gm10221  | 0.158187377  | 0.043241305 | 0.211314543 |
| ENSMUSG00000018209 | Stk4     | 0.23034158   | 0.043307405 | 0.211447044 |
| ENSMUSG00000061650 | Med9     | 0.219980855  | 0.043306669 | 0.211447044 |
| ENSMUSG00000050796 | B3galt6  | -0.205200946 | 0.043332746 | 0.211487637 |
| ENSMUSG00000026753 | Ppp6c    | 0.194801325  | 0.043382074 | 0.211645222 |
| ENSMUSG00000089818 | Gm15950  | -0.248497231 | 0.043425362 | 0.211773231 |
| ENSMUSG00000011752 | Pgam1    | 0.186992565  | 0.043479506 | 0.211930179 |
| ENSMUSG00000027752 | Exosc8   | 0.203723979  | 0.04349167  | 0.211930179 |
| ENSMUSG00000060671 | Atp8b2   | -0.100943279 | 0.043567353 | 0.212215721 |
| ENSMUSG00000049233 | Apoo-ps  | 0.226152357  | 0.043589735 | 0.212241515 |
| ENSMUSG00000043587 | Pxylp1   | -0.239085199 | 0.043684776 | 0.212537643 |
| ENSMUSG00000096740 | Lbhd1    | 0.204069709  | 0.043668405 | 0.212537643 |
| ENSMUSG00000028691 | Prdx1    | 0.155400386  | 0.043796481 | 0.212831022 |
| ENSMUSG00000039701 | Usp53    | 0.165475408  | 0.04376625  | 0.212831022 |
| ENSMUSG00000066315 | Gm12918  | 0.18779487   | 0.04378079  | 0.212831022 |
| ENSMUSG00000020949 | Fkbp3    | 0.208372126  | 0.043840757 | 0.212863711 |
| ENSMUSG00000030890 | Ilk      | -0.223222195 | 0.043845364 | 0.212863711 |
| ENSMUSG00000079225 | Gm9531   | 0.217818454  | 0.04385462  | 0.212863711 |
| ENSMUSG00000078887 | Gm6710   | -0.24747263  | 0.043920222 | 0.213098858 |
| ENSMUSG00000034850 | Tmem127  | -0.244011825 | 0.043964966 | 0.213232662 |
| ENSMUSG00000020198 | Ap3d1    | -0.244586157 | 0.044054727 | 0.213233872 |
| ENSMUSG00000028718 | Stil     | -0.243244435 | 0.044053162 | 0.213233872 |
| ENSMUSG00000037916 | Ndufv1   | 0.179174471  | 0.043991598 | 0.213233872 |
| ENSMUSG00000040282 | BC052040 | -0.249242273 | 0.044032956 | 0.213233872 |
| ENSMUSG00000048327 | Ckap2l   | -0.19770237  | 0.044068219 | 0.213233872 |
| ENSMUSG00000111877 | Gm6477   | 0.140676077  | 0.044037525 | 0.213233872 |
| ENSMUSG00000033411 | Ctdspl2  | -0.214955241 | 0.044090246 | 0.213257379 |
| ENSMUSG00000012114 | Med15    | -0.223843214 | 0.044143495 | 0.21343182  |
| ENSMUSG00000028923 | Necap2   | -0.22345064  | 0.044179119 | 0.213520947 |
| ENSMUSG00000029394 | Cdk2ap1  | 0.156859601  | 0.044208602 | 0.213580335 |
| ENSMUSG00000025162 | Csnk1d   | 0.224650916  | 0.044231524 | 0.213592254 |
| ENSMUSG00000028261 | Ndufaf4  | 0.192783147  | 0.044245461 | 0.213592254 |
| ENSMUSG00000033543 | Gtf2a2   | 0.186849799  | 0.044267074 | 0.213613568 |
| ENSMUSG00000044783 | Hjrp     | -0.221895536 | 0.044348714 | 0.21392442  |
| ENSMUSG00000026483 | Fam129a  | -0.244790862 | 0.044432965 | 0.214164477 |
| ENSMUSG00000043411 | Usp48    | -0.199368918 | 0.044422605 | 0.214164477 |
| ENSMUSG0000002346  | Slc25a42 | -0.233582056 | 0.044467181 | 0.214246259 |
| ENSMUSG00000009681 | Bcr      | 0.206531958  | 0.044493199 | 0.214288491 |

|                    |               |              |             |             |
|--------------------|---------------|--------------|-------------|-------------|
| ENSMUSG00000020736 | Nt5c          | 0.187166524  | 0.044708894 | 0.215160469 |
| ENSMUSG00000029119 | Man2b2        | -0.245266391 | 0.044694345 | 0.215160469 |
| ENSMUSG00000024066 | Xdh           | -0.246064218 | 0.044745944 | 0.215255373 |
| ENSMUSG00000027679 | Dnajc19       | 0.204751669  | 0.044768212 | 0.215279118 |
| ENSMUSG00000105879 | Gm6204        | 0.096024141  | 0.044803555 | 0.215365693 |
| ENSMUSG00000001948 | Spa17         | 0.2405369    | 0.044822594 | 0.215373865 |
| ENSMUSG00000022265 | Ank           | -0.233412    | 0.044851701 | 0.21538001  |
| ENSMUSG00000043998 | Mgat2         | -0.227885148 | 0.044858553 | 0.21538001  |
| ENSMUSG00000055312 | Them7         | 0.23875674   | 0.044877287 | 0.215386703 |
| ENSMUSG00000004612 | Nkg7          | 0.217707042  | 0.044916239 | 0.215481566 |
| ENSMUSG00000048058 | Ldlrad3       | -0.220320364 | 0.044949097 | 0.215481566 |
| ENSMUSG00000078919 | Dpm1          | 0.160159754  | 0.044934253 | 0.215481566 |
| ENSMUSG00000068758 | Il3ra         | -0.217000928 | 0.045054919 | 0.215905535 |
| ENSMUSG00000042520 | Ubap2l        | 0.250459212  | 0.045175222 | 0.216398548 |
| ENSMUSG00000023025 | Larp4         | 0.239473591  | 0.045212184 | 0.216492113 |
| ENSMUSG00000060044 | Tmem26        | -0.153000237 | 0.045269759 | 0.216684267 |
| ENSMUSG00000024535 | Snx24         | 0.162993457  | 0.045390911 | 0.216685858 |
| ENSMUSG00000029804 | Herc3         | -0.083294314 | 0.045353115 | 0.216685858 |
| ENSMUSG00000030766 | Arhgap17      | -0.247266058 | 0.045290275 | 0.216685858 |
| ENSMUSG00000030793 | Pycard        | 0.166912641  | 0.045317439 | 0.216685858 |
| ENSMUSG00000031984 | 2810004N23Rik | 0.158789883  | 0.045370871 | 0.216685858 |
| ENSMUSG00000040423 | Rc3h1         | -0.229350451 | 0.045392207 | 0.216685858 |
| ENSMUSG00000055093 | Gm8430        | 0.190553505  | 0.045381353 | 0.216685858 |
| ENSMUSG00000004056 | Akt2          | -0.24392449  | 0.045409839 | 0.216686751 |
| ENSMUSG00000002845 | Tmem39a       | -0.216372154 | 0.045455951 | 0.216823487 |
| ENSMUSG00000055485 | Soga1         | -0.112819654 | 0.045516555 | 0.217029223 |
| ENSMUSG00000024831 | Ighmbp2       | -0.231196915 | 0.0456103   | 0.217238565 |
| ENSMUSG00000033096 | Apmap         | 0.203019494  | 0.045612928 | 0.217238565 |
| ENSMUSG00000117359 | AC131796.1    | 0.045746184  | 0.045583119 | 0.217238565 |
| ENSMUSG00000040451 | Sgms1         | -0.220233213 | 0.045633377 | 0.217252654 |
| ENSMUSG00000005034 | Prkacb        | -0.242769402 | 0.04572206  | 0.217535757 |
| ENSMUSG00000017291 | Taok1         | 0.211086782  | 0.045727869 | 0.217535757 |
| ENSMUSG00000001855 | Nup214        | 0.243334389  | 0.045826297 | 0.217837137 |
| ENSMUSG00000094989 | Rpl9-ps4      | 0.22296637   | 0.045812544 | 0.217837137 |
| ENSMUSG00000019731 | Slc35e1       | -0.240460357 | 0.045949466 | 0.218339067 |
| ENSMUSG00000023991 | Foxp4         | -0.189248896 | 0.046044113 | 0.218705134 |
| ENSMUSG00000044645 | Gm7334        | 0.245779212  | 0.046137422 | 0.218981385 |
| ENSMUSG00000074673 | Ttll9         | 0.246225513  | 0.046137532 | 0.218981385 |
| ENSMUSG00000002105 | Slc39a13      | -0.245037008 | 0.046167863 | 0.219041645 |
| ENSMUSG00000048920 | Fkrp          | -0.222098175 | 0.046301583 | 0.219592195 |
| ENSMUSG00000036186 | Fam69b        | 0.220405194  | 0.046327462 | 0.219631069 |
| ENSMUSG00000049680 | Urgcp         | -0.204363487 | 0.046408165 | 0.219845848 |
| ENSMUSG00000096722 | Hmgb1-ps9     | 0.086098475  | 0.046390954 | 0.219845848 |

|                    |               |              |             |             |
|--------------------|---------------|--------------|-------------|-------------|
| ENSMUSG00000048087 | Gm4737        | 0.231332373  | 0.046619508 | 0.22076283  |
| ENSMUSG00000031429 | Psmid10       | 0.189551937  | 0.046674584 | 0.22085524  |
| ENSMUSG00000032743 | D430042O09Rik | -0.220346273 | 0.046658896 | 0.22085524  |
| ENSMUSG00000040249 | Lrp1          | 0.174823438  | 0.046762473 | 0.221186855 |
| ENSMUSG00000052155 | Acvr2a        | -0.106101039 | 0.046781779 | 0.221193941 |
| ENSMUSG00000062007 | Hsh2d         | 0.237594232  | 0.046819523 | 0.221288165 |
| ENSMUSG00000107068 | Gm42742       | -0.171432389 | 0.046869272 | 0.221439039 |
| ENSMUSG00000020876 | Snx11         | -0.224301327 | 0.0468992   | 0.221496182 |
| ENSMUSG00000021906 | Oxnad1        | 0.190902896  | 0.04694764  | 0.221556473 |
| ENSMUSG00000025194 | Abcc2         | 0.11825005   | 0.046931897 | 0.221556473 |
| ENSMUSG00000041797 | Abca9         | -0.243750331 | 0.047000889 | 0.221666556 |
| ENSMUSG00000068747 | Sort1         | 0.232970934  | 0.047006659 | 0.221666556 |
| ENSMUSG00000002052 | Supt6         | 0.236596893  | 0.047035683 | 0.221719249 |
| ENSMUSG00000032348 | Gsta4         | 0.173416843  | 0.04707727  | 0.221831097 |
| ENSMUSG00000094396 | Vmn2r124      | 0.244892095  | 0.047104676 | 0.221876063 |
| ENSMUSG00000024856 | Cdk2ap2       | 0.186048874  | 0.047202988 | 0.222254856 |
| ENSMUSG00000083974 | Gm16053       | 0.22320498   | 0.047271337 | 0.222492335 |
| ENSMUSG00000037461 | Ints7         | -0.188590457 | 0.04737928  | 0.222915923 |
| ENSMUSG00000029713 | Gnb2          | -0.228610874 | 0.047445588 | 0.223143374 |
| ENSMUSG00000021939 | Ctsb          | -0.235188889 | 0.047516962 | 0.22339447  |
| ENSMUSG00000022672 | Prkdc         | -0.236358992 | 0.047549667 | 0.223463646 |
| ENSMUSG00000021156 | Zmynd11       | -0.240419445 | 0.047624686 | 0.223646968 |
| ENSMUSG00000070000 | Fcho1         | -0.24206902  | 0.047615773 | 0.223646968 |
| ENSMUSG00000021066 | Atl1          | -0.084757314 | 0.0477012   | 0.223892912 |
| ENSMUSG00000062352 | Itgb1bp1      | 0.166088356  | 0.04771311  | 0.223892912 |
| ENSMUSG00000034786 | Gpsm3         | -0.239844159 | 0.04775067  | 0.223984546 |
| ENSMUSG00000024773 | Atg2a         | -0.240393527 | 0.047789122 | 0.224039888 |
| ENSMUSG00000036278 | MacroD1       | -0.240293373 | 0.047798543 | 0.224039888 |
| ENSMUSG00000038446 | Cdc40         | 0.192518558  | 0.047824781 | 0.22407831  |
| ENSMUSG00000015619 | Gata3         | -0.031865844 | 0.047955876 | 0.224402299 |
| ENSMUSG00000035356 | Nfkbiz        | -0.050577348 | 0.047937155 | 0.224402299 |
| ENSMUSG00000055204 | Ankrd17       | 0.203385287  | 0.047966195 | 0.224402299 |
| ENSMUSG00000078784 | 1810022K09Rik | 0.170773461  | 0.047951748 | 0.224402299 |
| ENSMUSG00000026238 | Ptma          | 0.22611636   | 0.0480107   | 0.224450681 |
| ENSMUSG00000061411 | Nol4l         | -0.231778486 | 0.048012677 | 0.224450681 |
| ENSMUSG00000024038 | Ndufv3        | 0.16810857   | 0.048032261 | 0.224457756 |
| ENSMUSG00000022498 | Txndc11       | -0.232636681 | 0.04812554  | 0.224809076 |
| ENSMUSG00000090115 | Usp49         | -0.144582491 | 0.048162548 | 0.224897374 |
| ENSMUSG00000054021 | Sirt5         | 0.241850824  | 0.048253129 | 0.22523567  |
| ENSMUSG00000109820 | Gm45654       | 0.151374627  | 0.048279437 | 0.225273813 |
| ENSMUSG00000059852 | Kcng2         | -0.099261371 | 0.048357057 | 0.225551261 |
| ENSMUSG00000006315 | Tmem147       | 0.19673642   | 0.048398006 | 0.225657522 |
| ENSMUSG00000045216 | Hs6st1        | -0.216367283 | 0.048432151 | 0.225731988 |

|                    |               |              |             |             |
|--------------------|---------------|--------------|-------------|-------------|
| ENSMUSG00000027175 | Tcp11l1       | 0.196372386  | 0.048470644 | 0.225826658 |
| ENSMUSG00000042757 | Tmem108       | 0.234599095  | 0.04850787  | 0.225915357 |
| ENSMUSG00000046798 | Cldn12        | 0.088461054  | 0.048546435 | 0.225925543 |
| ENSMUSG00000063320 | 1190007I07Rik | 0.18985412   | 0.048545587 | 0.225925543 |
| ENSMUSG00000034255 | Arhgap27      | -0.161691021 | 0.048574682 | 0.225972332 |
| ENSMUSG00000027133 | Nop10         | 0.158148942  | 0.048599758 | 0.226004342 |
| ENSMUSG00000040462 | Os9           | -0.17194817  | 0.048620909 | 0.226018079 |
| ENSMUSG00000018736 | Ndel1         | -0.220426036 | 0.048676979 | 0.226077215 |
| ENSMUSG00000037376 | Trmt6         | 0.217966783  | 0.048706435 | 0.226077215 |
| ENSMUSG00000068134 | Zfp120        | -0.209263778 | 0.048690216 | 0.226077215 |
| ENSMUSG00000071653 | 1810009A15Rik | 0.207243965  | 0.048699134 | 0.226077215 |
| ENSMUSG00000021911 | Parg          | -0.19803278  | 0.048729494 | 0.226099756 |
| ENSMUSG00000022400 | Rbx1          | 0.183682351  | 0.048830879 | 0.22614778  |
| ENSMUSG00000023892 | Zfp51         | -0.240748712 | 0.048817432 | 0.22614778  |
| ENSMUSG00000024387 | Csnk2b        | 0.207759194  | 0.048791915 | 0.22614778  |
| ENSMUSG00000028337 | Coro2a        | -0.192851036 | 0.048768037 | 0.22614778  |
| ENSMUSG00000087687 | Pet100        | -0.198479565 | 0.04882583  | 0.22614778  |
| ENSMUSG00000025505 | Tmem80        | -0.207225373 | 0.048927538 | 0.226361542 |
| ENSMUSG00000027510 | Rbm38         | -0.168536646 | 0.048915896 | 0.226361542 |
| ENSMUSG00000045078 | Rnf216        | -0.235996242 | 0.048931708 | 0.226361542 |
| ENSMUSG00000029213 | Commd8        | 0.166746653  | 0.048967155 | 0.226441188 |
| ENSMUSG00000105081 | Gm43110       | 0.2053606    | 0.04899055  | 0.226465064 |
| ENSMUSG00000056216 | Cebpg         | -0.21071672  | 0.049039989 | 0.226609264 |
| ENSMUSG00000011096 | Akt1s1        | -0.214494595 | 0.049074882 | 0.226686168 |
| ENSMUSG00000060992 | Copz1         | 0.22434622   | 0.049225768 | 0.227225114 |
| ENSMUSG00000096107 | Gm16505       | -0.046300195 | 0.049228144 | 0.227225114 |
| ENSMUSG00000034121 | Mks1          | -0.233707204 | 0.049251642 | 0.227249125 |
| ENSMUSG00000014232 | Cluap1        | 0.190644572  | 0.049327081 | 0.227512691 |
| ENSMUSG00000046731 | Kctd11        | -0.195839653 | 0.049414021 | 0.227829084 |
| ENSMUSG00000007836 | Hnrnpa0       | 0.238757049  | 0.049469084 | 0.227998328 |
| ENSMUSG00000021140 | Pcnx          | 0.167311788  | 0.049524721 | 0.228170087 |
| ENSMUSG00000025602 | Zfp202        | -0.22596291  | 0.049685665 | 0.228720848 |
| ENSMUSG00000045624 | Esf1          | 0.198376307  | 0.049696474 | 0.228720848 |
| ENSMUSG00000083287 | Gm13502       | -0.236669388 | 0.049699506 | 0.228720848 |
| ENSMUSG00000024862 | Klc2          | -0.062541215 | 0.049723084 | 0.2287446   |
| ENSMUSG00000012422 | Tmem167       | 0.163476169  | 0.049753502 | 0.228799794 |
| ENSMUSG00000039221 | Rpl22l1       | 0.21717083   | 0.049773747 | 0.228808184 |
| ENSMUSG00000028271 | Gtf2b         | 0.236200894  | 0.049799312 | 0.228841013 |
| ENSMUSG00000027185 | Nat10         | 0.233341111  | 0.04986015  | 0.228970887 |
| ENSMUSG00000098112 | Bin2          | -0.22005986  | 0.049864443 | 0.228970887 |
| ENSMUSG00000050777 | Tmem37        | 0.113910174  | 0.049957375 | 0.229312844 |
| ENSMUSG00000021668 | Polk          | -0.209416044 | 0.04999847  | 0.229416697 |
| ENSMUSG00000008036 | Ap2s1         | 0.166830152  | 0.050055579 | 0.229593923 |

|                    |               |              |             |             |
|--------------------|---------------|--------------|-------------|-------------|
| ENSMUSG0000000154  | Slc22a18      | -0.174658829 | 0.050083705 | 0.229638133 |
| ENSMUSG00000041895 | Wipi1         | -0.210908365 | 0.050149892 | 0.229856756 |
| ENSMUSG00000022898 | Vps26c        | -0.195026131 | 0.050234195 | 0.230158222 |
| ENSMUSG00000021945 | Zmym2         | 0.19991446   | 0.050275974 | 0.230179827 |
| ENSMUSG00000044348 | Slc25a53      | 0.143901499  | 0.050261496 | 0.230179827 |
| ENSMUSG00000004651 | Tyr           | -0.215768097 | 0.050321093 | 0.230301511 |
| ENSMUSG00000035572 | Dcaf10        | -0.233129145 | 0.050402385 | 0.230523982 |
| ENSMUSG00000057367 | Birc2         | -0.212407637 | 0.050406822 | 0.230523982 |
| ENSMUSG00000002996 | Hbp1          | -0.231675603 | 0.050468049 | 0.230572303 |
| ENSMUSG00000022125 | Cln5          | -0.235363843 | 0.050473077 | 0.230572303 |
| ENSMUSG00000036693 | Nop14         | 0.210566501  | 0.050454565 | 0.230572303 |
| ENSMUSG00000044906 | 4930503L19Rik | -0.214666713 | 0.050528644 | 0.230741282 |
| ENSMUSG00000039942 | Ptger4        | -0.235974632 | 0.05061019  | 0.231028729 |
| ENSMUSG00000000148 | Brat1         | -0.236766938 | 0.050643258 | 0.231092115 |
| ENSMUSG00000045349 | Sh2d5         | -0.23269711  | 0.050679851 | 0.231092115 |
| ENSMUSG00000063765 | Chadl         | -0.087100837 | 0.050679891 | 0.231092115 |
| ENSMUSG00000035161 | Ints6         | -0.235593126 | 0.050750754 | 0.231330316 |
| ENSMUSG00000006906 | Stambp        | -0.195290521 | 0.050835924 | 0.231633535 |
| ENSMUSG00000026219 | Trip12        | 0.206603909  | 0.050896779 | 0.231825778 |
| ENSMUSG00000031657 | Heatr3        | 0.213317256  | 0.050956029 | 0.231925555 |
| ENSMUSG00000050846 | Zfp623        | -0.234099199 | 0.050937673 | 0.231925555 |
| ENSMUSG00000020086 | H2afy2        | -0.154990924 | 0.05104737  | 0.232171138 |
| ENSMUSG00000029714 | Gigyf1        | -0.230775765 | 0.051031113 | 0.232171138 |
| ENSMUSG00000003099 | Ppp5c         | -0.215164809 | 0.051089678 | 0.23227851  |
| ENSMUSG00000001228 | Uhrf1         | -0.209495004 | 0.051191978 | 0.232372736 |
| ENSMUSG00000031935 | Med17         | 0.175240275  | 0.051203943 | 0.232372736 |
| ENSMUSG00000036908 | Unc93b1       | -0.233342508 | 0.051176908 | 0.232372736 |
| ENSMUSG00000061991 | Hist1h2af     | 0.191909852  | 0.051132764 | 0.232372736 |
| ENSMUSG00000110331 | Nudc-ps1      | 0.181770722  | 0.051167011 | 0.232372736 |
| ENSMUSG00000042909 | Olfra648      | -0.093608851 | 0.051242112 | 0.232461019 |
| ENSMUSG00000027490 | E2f1          | -0.179733236 | 0.051266232 | 0.232485528 |
| ENSMUSG00000036781 | Rps27l        | 0.166577923  | 0.051319105 | 0.232640366 |
| ENSMUSG00000003363 | Pld3          | -0.216419779 | 0.051403927 | 0.232790774 |
| ENSMUSG00000030592 | Ryr1          | 0.227578122  | 0.051427251 | 0.232790774 |
| ENSMUSG00000033021 | Gmppa         | -0.158458677 | 0.051424164 | 0.232790774 |
| ENSMUSG00000101617 | Gm6947        | 0.234823633  | 0.051395524 | 0.232790774 |
| ENSMUSG00000001440 | Kpnb1         | 0.2103901    | 0.051480007 | 0.232859857 |
| ENSMUSG00000074811 | Hps6          | -0.223997986 | 0.051464334 | 0.232859857 |
| ENSMUSG00000001666 | Ddt           | 0.214059731  | 0.051520282 | 0.232872426 |
| ENSMUSG00000026994 | Galnt3        | 0.170246976  | 0.051507893 | 0.232872426 |
| ENSMUSG00000020538 | Srebf1        | -0.209631893 | 0.051564739 | 0.232988585 |
| ENSMUSG00000046668 | Cxxc5         | -0.22977122  | 0.051589747 | 0.233016817 |
| ENSMUSG00000039456 | Morc3         | 0.21812845   | 0.051677757 | 0.233112546 |

|                    |           |              |             |             |
|--------------------|-----------|--------------|-------------|-------------|
| ENSMUSG00000041199 | Rpusd1    | -0.218095291 | 0.051686012 | 0.233112546 |
| ENSMUSG00000047098 | Rnf31     | -0.230509788 | 0.051673508 | 0.233112546 |
| ENSMUSG00000098238 | Gm8756    | 0.109067392  | 0.05167152  | 0.233112546 |
| ENSMUSG00000037197 | Rbm17     | 0.182572352  | 0.051792188 | 0.233421904 |
| ENSMUSG00000046897 | Zfp740    | -0.209735047 | 0.051775652 | 0.233421904 |
| ENSMUSG00000037295 | Ldlrap1   | -0.223463299 | 0.051847486 | 0.233586369 |
| ENSMUSG00000053581 | Zfand2a   | -0.229516503 | 0.051950341 | 0.233964895 |
| ENSMUSG00000078238 | Gm12854   | 0.226304276  | 0.051994392 | 0.2339936   |
| ENSMUSG00000096255 | Dynlt1b   | 0.161165361  | 0.051993511 | 0.2339936   |
| ENSMUSG00000019761 | Krt10     | -0.233115454 | 0.052281536 | 0.235200638 |
| ENSMUSG00000021028 | Mbip      | -0.221253022 | 0.052376002 | 0.235540305 |
| ENSMUSG00000002699 | Lcp2      | -0.225081025 | 0.05242199  | 0.235661795 |
| ENSMUSG00000025135 | Anapc11   | -0.21537321  | 0.05246695  | 0.235710997 |
| ENSMUSG00000031453 | Rasa3     | -0.21662736  | 0.052489865 | 0.235710997 |
| ENSMUSG00000069272 | Hist1h2ae | 0.230696498  | 0.052473054 | 0.235710997 |
| ENSMUSG00000055850 | Rnf181    | -0.16465936  | 0.052600743 | 0.236123536 |
| ENSMUSG00000024663 | Rab3il1   | 0.229982571  | 0.052655645 | 0.236284599 |
| ENSMUSG00000030674 | Qprt      | -0.115413804 | 0.052675115 | 0.236286603 |
| ENSMUSG00000075703 | Selenoi   | 0.209712113  | 0.052721695 | 0.23641017  |
| ENSMUSG00000029376 | Mthfd2l   | -0.232864082 | 0.052756406 | 0.236480449 |
| ENSMUSG00000039703 | Nploc4    | -0.224698267 | 0.052782249 | 0.236510934 |
| ENSMUSG00000078653 | Cntd1     | -0.20841531  | 0.0528434   | 0.236699559 |
| ENSMUSG00000070737 | Tmem35b   | -0.194440451 | 0.052886961 | 0.236809279 |
| ENSMUSG00000032497 | Lrrfip2   | 0.208260752  | 0.05290938  | 0.236824291 |
| ENSMUSG00000031787 | Katnb1    | -0.200689059 | 0.052977088 | 0.236871277 |
| ENSMUSG00000043631 | Ecm2      | -0.220076144 | 0.052971108 | 0.236871277 |
| ENSMUSG00000053063 | Clec12a   | 0.130395733  | 0.052968981 | 0.236871277 |
| ENSMUSG00000039461 | Tcta      | -0.210368936 | 0.053014976 | 0.236955384 |
| ENSMUSG00000029165 | Agbl5     | -0.198789414 | 0.053064526 | 0.237029394 |
| ENSMUSG00000049764 | Zfp280b   | -0.18457202  | 0.053072791 | 0.237029394 |
| ENSMUSG00000110206 | Flt3l     | -0.143500987 | 0.053088783 | 0.237029394 |
| ENSMUSG00000062526 | Mppe1     | -0.184602499 | 0.053151216 | 0.237222872 |
| ENSMUSG00000026939 | Tmem141   | 0.205163382  | 0.053293797 | 0.237603105 |
| ENSMUSG00000037573 | Tob1      | -0.222355278 | 0.053276066 | 0.237603105 |
| ENSMUSG00000040877 | Wdr25     | -0.231037707 | 0.053262692 | 0.237603105 |
| ENSMUSG00000071659 | Hnrnpul2  | 0.221838518  | 0.053340921 | 0.237727872 |
| ENSMUSG00000021224 | Numb      | -0.218241364 | 0.053482114 | 0.238271641 |
| ENSMUSG00000004748 | Mtfp1     | 0.195423924  | 0.053569831 | 0.238551015 |
| ENSMUSG00000024982 | Zdhhc6    | -0.164815882 | 0.053654431 | 0.238551015 |
| ENSMUSG00000028958 | Tmub1     | -0.214677207 | 0.053639896 | 0.238551015 |
| ENSMUSG00000033159 | Cnppd1    | -0.218537173 | 0.053594166 | 0.238551015 |
| ENSMUSG00000038648 | Creb3l2   | -0.172042465 | 0.053613419 | 0.238551015 |
| ENSMUSG00000047003 | Zfp41     | -0.230166309 | 0.053660054 | 0.238551015 |

|                    |               |              |             |             |
|--------------------|---------------|--------------|-------------|-------------|
| ENSMUSG00000032479 | Map4          | -0.213324262 | 0.053696802 | 0.238628971 |
| ENSMUSG00000021423 | Ly86          | -0.198970599 | 0.053748733 | 0.238688958 |
| ENSMUSG00000026275 | Ppp1r7        | 0.204676905  | 0.053745817 | 0.238688958 |
| ENSMUSG00000027639 | Samhd1        | -0.212251106 | 0.053873572 | 0.239072395 |
| ENSMUSG00000033852 | Gm28042       | -0.139280231 | 0.053868784 | 0.239072395 |
| ENSMUSG00000022706 | Mrpl40        | 0.156875054  | 0.053899744 | 0.239081264 |
| ENSMUSG00000047804 | Akap10        | -0.218522282 | 0.053914067 | 0.239081264 |
| ENSMUSG00000042608 | Stk40         | -0.153379504 | 0.053990724 | 0.239335756 |
| ENSMUSG00000061024 | Rrs1          | 0.18051979   | 0.054038269 | 0.239461057 |
| ENSMUSG00000031134 | Rbmx          | -0.201371561 | 0.054066675 | 0.239501485 |
| ENSMUSG00000099998 | Gm6501        | 0.217734639  | 0.054087913 | 0.23951015  |
| ENSMUSG00000002603 | Tgfb1         | -0.183118563 | 0.054141552 | 0.23966223  |
| ENSMUSG00000031823 | Zdhhc7        | -0.223531534 | 0.054236243 | 0.239910389 |
| ENSMUSG00000075470 | Alg10b        | 0.127201401  | 0.05422351  | 0.239910389 |
| ENSMUSG00000024583 | Txnl1         | 0.173404806  | 0.054316526 | 0.240009095 |
| ENSMUSG00000027953 | Slc50a1       | -0.149587747 | 0.05429952  | 0.240009095 |
| ENSMUSG00000029553 | Tfec          | 0.171416285  | 0.054312278 | 0.240009095 |
| ENSMUSG00000020576 | Nbas          | 0.158828111  | 0.054428525 | 0.240107476 |
| ENSMUSG00000044367 | Slc16a13      | -0.14067099  | 0.054411534 | 0.240107476 |
| ENSMUSG00000068284 | Usf3          | 0.172889858  | 0.054435444 | 0.240107476 |
| ENSMUSG00000092260 | Zfp963        | -0.222657401 | 0.05439656  | 0.240107476 |
| ENSMUSG00000098091 | Gm16470       | 0.106695805  | 0.054378283 | 0.240107476 |
| ENSMUSG00000048922 | Cdca2         | -0.158497935 | 0.054508289 | 0.240343433 |
| ENSMUSG00000034708 | Grn           | -0.207583676 | 0.054534978 | 0.240375786 |
| ENSMUSG00000036533 | Cdc42ep3      | -0.138951784 | 0.054556803 | 0.240386679 |
| ENSMUSG00000036944 | Tmem71        | -0.204330567 | 0.054704487 | 0.240951928 |
| ENSMUSG00000049916 | 2610318N02Rik | 0.189929355  | 0.054726258 | 0.240962373 |
| ENSMUSG00000035671 | Zswim4        | -0.202051178 | 0.054837339 | 0.241253602 |
| ENSMUSG00000037013 | Ss18          | -0.198238367 | 0.05485067  | 0.241253602 |
| ENSMUSG00000110841 | Gpx4-ps2      | 0.168413771  | 0.054825034 | 0.241253602 |
| ENSMUSG00000030446 | Zfp273        | -0.216704716 | 0.054910178 | 0.241429848 |
| ENSMUSG00000029780 | Nt5c3         | 0.20457288   | 0.054953826 | 0.24145082  |
| ENSMUSG00000046679 | C87436        | -0.175861204 | 0.054939694 | 0.24145082  |
| ENSMUSG00000031754 | Nudt21        | 0.152881772  | 0.0550584   | 0.241653847 |
| ENSMUSG00000055302 | Mrfap1        | 0.193097139  | 0.055034147 | 0.241653847 |
| ENSMUSG00000071369 | Map3k5        | -0.218636854 | 0.05505645  | 0.241653847 |
| ENSMUSG00000045176 | Borcs6        | -0.222206673 | 0.055108808 | 0.241758239 |
| ENSMUSG00000057672 | Pkn1          | -0.224314442 | 0.055121112 | 0.241758239 |
| ENSMUSG00000020827 | Mink1         | -0.104488634 | 0.055149272 | 0.241796366 |
| ENSMUSG00000027698 | Nceh1         | -0.222219057 | 0.055212755 | 0.241818626 |
| ENSMUSG00000037933 | Bicd2         | -0.196454685 | 0.055185549 | 0.241818626 |
| ENSMUSG00000039623 | Ap5z1         | -0.217675089 | 0.055202294 | 0.241818626 |
| ENSMUSG00000062761 | Zfp512        | -0.221882095 | 0.055242334 | 0.241862895 |

|                    |               |              |             |             |
|--------------------|---------------|--------------|-------------|-------------|
| ENSMUSG00000028270 | Gbp2          | -0.21300651  | 0.055296158 | 0.24201324  |
| ENSMUSG00000001755 | Coasy         | 0.185055062  | 0.055372233 | 0.24220737  |
| ENSMUSG00000026615 | Eprs          | 0.182835588  | 0.055379513 | 0.24220737  |
| ENSMUSG00000002059 | Rab34         | 0.20075069   | 0.055404393 | 0.242230893 |
| ENSMUSG00000020717 | Pecam1        | -0.202638499 | 0.055434919 | 0.242245484 |
| ENSMUSG00000032288 | Imp3          | 0.194757336  | 0.055446736 | 0.242245484 |
| ENSMUSG00000031245 | Hmgn5         | 0.186054218  | 0.055550807 | 0.242614828 |
| ENSMUSG00000009145 | Dqx1          | -0.202478826 | 0.055601957 | 0.242667573 |
| ENSMUSG00000096472 | Cdkn2d        | -0.166356051 | 0.055586794 | 0.242667573 |
| ENSMUSG00000035007 | Rundc1        | -0.225589301 | 0.055701216 | 0.243015385 |
| ENSMUSG00000110648 | Gm38574       | 0.083990568  | 0.055730301 | 0.243056906 |
| ENSMUSG00000071793 | 2610005L07Rik | -0.216715344 | 0.055758204 | 0.243093246 |
| ENSMUSG00000014177 | Tvp23b        | -0.207565183 | 0.055790026 | 0.243146636 |
| ENSMUSG00000021585 | Cast          | -0.214256746 | 0.055833961 | 0.24316747  |
| ENSMUSG00000040528 | Milr1         | 0.167104086  | 0.055818877 | 0.24316747  |
| ENSMUSG00000031824 | 6430548M08Rik | -0.094560924 | 0.055861603 | 0.243202584 |
| ENSMUSG00000010277 | 2610507B11Rik | 0.191865531  | 0.055910704 | 0.243266322 |
| ENSMUSG00000080866 | Gm5687        | 0.104442891  | 0.055915413 | 0.243266322 |
| ENSMUSG00000083875 | Gm13831       | 0.095253866  | 0.055981561 | 0.243468827 |
| ENSMUSG00000045427 | Hnrnp2        | 0.146488791  | 0.056024445 | 0.243570048 |
| ENSMUSG00000045104 | Gm5514        | -0.216890511 | 0.056123087 | 0.243913526 |
| ENSMUSG00000039232 | Stx11         | -0.221155478 | 0.056168718 | 0.24402646  |
| ENSMUSG00000028013 | Ppa2          | 0.180021111  | 0.056259135 | 0.244333817 |
| ENSMUSG00000047843 | Bri3          | -0.164377111 | 0.056291767 | 0.244390085 |
| ENSMUSG00000038623 | Tm6sf1        | -0.148062267 | 0.0564251   | 0.244882596 |
| ENSMUSG00000078861 | Zfp931        | -0.222490545 | 0.05644464  | 0.244882596 |
| ENSMUSG00000036339 | Tmem260       | -0.22370301  | 0.056478511 | 0.24494399  |
| ENSMUSG00000036052 | Dnajb5        | -0.175319064 | 0.056532806 | 0.245093887 |
| ENSMUSG00000027284 | Cdan1         | -0.225232458 | 0.056603634 | 0.245306085 |
| ENSMUSG00000027469 | Tpx2          | -0.208698052 | 0.05662125  | 0.245306085 |
| ENSMUSG00000006728 | Cdk4          | 0.147730328  | 0.056846807 | 0.245456343 |
| ENSMUSG00000021286 | Zfyve21       | -0.200238837 | 0.056721228 | 0.245456343 |
| ENSMUSG00000024360 | Etf1          | 0.210053231  | 0.056801775 | 0.245456343 |
| ENSMUSG00000029270 | Fam69a        | -0.214960275 | 0.056721703 | 0.245456343 |
| ENSMUSG00000039477 | Tnrc18        | -0.224326615 | 0.056853546 | 0.245456343 |
| ENSMUSG00000040356 | Skiv2l        | -0.217423446 | 0.056731519 | 0.245456343 |
| ENSMUSG00000052544 | St6galnac3    | -0.175284393 | 0.056840133 | 0.245456343 |
| ENSMUSG00000059810 | Rgs3          | -0.176628029 | 0.056805001 | 0.245456343 |
| ENSMUSG00000084353 | Gm15452       | 0.181935879  | 0.056847554 | 0.245456343 |
| ENSMUSG00000098208 | Gm8349        | 0.095322514  | 0.056752744 | 0.245456343 |
| ENSMUSG00000006463 | Zdhhc24       | -0.221146125 | 0.056981676 | 0.245924046 |
| ENSMUSG00000001105 | lft20         | 0.17830823   | 0.057028428 | 0.246040328 |
| ENSMUSG00000006179 | Prss16        | 0.195504672  | 0.057090031 | 0.246061575 |

|                    |            |              |             |             |
|--------------------|------------|--------------|-------------|-------------|
| ENSMUSG00000026005 | Rpe        | 0.189314743  | 0.057156097 | 0.246061575 |
| ENSMUSG00000028256 | Odf2l      | 0.218385107  | 0.057218482 | 0.246061575 |
| ENSMUSG00000028466 | Creb3      | -0.203099123 | 0.057141869 | 0.246061575 |
| ENSMUSG00000031669 | Gins3      | -0.203246256 | 0.057236887 | 0.246061575 |
| ENSMUSG00000034832 | Tet3       | 0.199135604  | 0.057251264 | 0.246061575 |
| ENSMUSG00000037552 | Plekhg2    | -0.121602718 | 0.057053889 | 0.246061575 |
| ENSMUSG00000044991 | Shld1      | -0.224225163 | 0.057225349 | 0.246061575 |
| ENSMUSG00000046722 | Cdc42se1   | -0.153217702 | 0.057126417 | 0.246061575 |
| ENSMUSG00000093904 | Tomm20     | 0.173971422  | 0.057247079 | 0.246061575 |
| ENSMUSG00000101610 | Gm7560     | 0.091617132  | 0.057192421 | 0.246061575 |
| ENSMUSG00000029777 | Gars       | 0.175056925  | 0.0573239   | 0.246235954 |
| ENSMUSG00000038990 | Cables2    | -0.219374246 | 0.057331485 | 0.246235954 |
| ENSMUSG00000078921 | Tgtp2      | -0.160359132 | 0.057416477 | 0.246515751 |
| ENSMUSG00000029319 | Coq2       | 0.17860051   | 0.057541155 | 0.246830321 |
| ENSMUSG00000038055 | Dexi       | -0.209624738 | 0.057549361 | 0.246830321 |
| ENSMUSG00000039183 | Nubp2      | 0.176842668  | 0.05753478  | 0.246830321 |
| ENSMUSG00000028702 | Rad54l     | -0.222997128 | 0.057589955 | 0.24691917  |
| ENSMUSG00000033760 | Rbm4b      | -0.208269512 | 0.057667162 | 0.247164881 |
| ENSMUSG00000001517 | Foxm1      | -0.200078041 | 0.057829413 | 0.247414898 |
| ENSMUSG00000009633 | G0s2       | 0.210816071  | 0.057750578 | 0.247414898 |
| ENSMUSG00000025047 | Pdcd11     | 0.202062114  | 0.057897409 | 0.247414898 |
| ENSMUSG00000026634 | Angel2     | -0.180883614 | 0.057953173 | 0.247414898 |
| ENSMUSG00000028343 | Erp44      | 0.193930161  | 0.057810663 | 0.247414898 |
| ENSMUSG00000037373 | Ctbp1      | -0.19972804  | 0.057964524 | 0.247414898 |
| ENSMUSG00000037960 | Card19     | -0.194008426 | 0.057871835 | 0.247414898 |
| ENSMUSG00000040435 | Ppp1r15a   | -0.193217693 | 0.057933003 | 0.247414898 |
| ENSMUSG00000063406 | Tmed5      | 0.178776236  | 0.057952682 | 0.247414898 |
| ENSMUSG00000079037 | Prnp       | -0.143224569 | 0.057779328 | 0.247414898 |
| ENSMUSG00000081665 | Gm15922    | -0.090875214 | 0.057869337 | 0.247414898 |
| ENSMUSG00000111162 | Gm7293     | 0.105750808  | 0.057789679 | 0.247414898 |
| ENSMUSG00000027215 | Cd82       | -0.222951752 | 0.057988174 | 0.247430817 |
| ENSMUSG00000021276 | Cinp       | 0.189167525  | 0.058023539 | 0.247496694 |
| ENSMUSG00000015342 | Xk         | 0.213753569  | 0.058060764 | 0.247570461 |
| ENSMUSG00000038637 | Lrrc56     | -0.126341586 | 0.058091317 | 0.247615735 |
| ENSMUSG00000034110 | Kctd7      | -0.19467949  | 0.05813807  | 0.247645052 |
| ENSMUSG00000034854 | Mfsd12     | -0.190395525 | 0.058130883 | 0.247645052 |
| ENSMUSG00000020917 | Acly       | -0.205484233 | 0.058247861 | 0.2479879   |
| ENSMUSG00000040048 | Ndufb10    | 0.173786768  | 0.058258489 | 0.2479879   |
| ENSMUSG00000029715 | Pop7       | 0.181525585  | 0.058391205 | 0.248463217 |
| ENSMUSG00000039682 | Lap3       | 0.182017764  | 0.05841016  | 0.248463217 |
| ENSMUSG00000083854 | Dnajc19-ps | 0.218482463  | 0.058445958 | 0.248530382 |
| ENSMUSG00000024622 | Hmgxb3     | -0.219428065 | 0.058659312 | 0.249181706 |
| ENSMUSG00000026502 | Desi2      | 0.206224469  | 0.058638707 | 0.249181706 |

|                    |                |              |             |             |
|--------------------|----------------|--------------|-------------|-------------|
| ENSMUSG00000069206 | Zfp874a        | -0.221914676 | 0.058648062 | 0.249181706 |
| ENSMUSG00000057637 | Prdm2          | 0.209313988  | 0.058688722 | 0.249221408 |
| ENSMUSG00000105408 | Gm7285         | -0.221068094 | 0.058740518 | 0.24935611  |
| ENSMUSG00000004865 | Srpk1          | 0.179513185  | 0.058770289 | 0.249386797 |
| ENSMUSG00000024899 | Papss2         | -0.216369263 | 0.058787903 | 0.249386797 |
| ENSMUSG00000071256 | Zfp213         | -0.209866642 | 0.058812716 | 0.249406876 |
| ENSMUSG00000103933 | Gm36964        | 0.223186814  | 0.058856551 | 0.249507584 |
| ENSMUSG00000027134 | Lpcat4         | 0.217704063  | 0.058962422 | 0.249871118 |
| ENSMUSG00000018239 | Zcchc10        | 0.189361661  | 0.059030479 | 0.250074209 |
| ENSMUSG00000000184 | Ccnd2          | 0.222315152  | 0.059222042 | 0.250279825 |
| ENSMUSG00000001741 | Ii16           | -0.207321877 | 0.059215468 | 0.250279825 |
| ENSMUSG00000021754 | Map3k1         | -0.221387479 | 0.059153001 | 0.250279825 |
| ENSMUSG00000027893 | Ahcyl1         | -0.198402979 | 0.059117562 | 0.250279825 |
| ENSMUSG00000031399 | Fam3a          | -0.189666891 | 0.059190924 | 0.250279825 |
| ENSMUSG00000036992 | Nxt1           | 0.159550281  | 0.059318954 | 0.250279825 |
| ENSMUSG00000038286 | Bphl           | 0.194469234  | 0.059312051 | 0.250279825 |
| ENSMUSG00000042460 | C1galt1        | 0.214703435  | 0.059312981 | 0.250279825 |
| ENSMUSG00000054951 | 9130008F23Rik  | -0.170695762 | 0.059320812 | 0.250279825 |
| ENSMUSG00000069893 | 9930111J21Rik1 | -0.169875179 | 0.059249207 | 0.250279825 |
| ENSMUSG00000096810 | Gm10481        | 0.10479575   | 0.059244828 | 0.250279825 |
| ENSMUSG00000110344 | Gm45716        | 0.212217539  | 0.059181982 | 0.250279825 |
| ENSMUSG00000026811 | St6galnac6     | -0.20897042  | 0.059391435 | 0.250492706 |
| ENSMUSG00000000167 | Pih1d2         | 0.186364419  | 0.059432189 | 0.250579505 |
| ENSMUSG00000066684 | Pilrb1         | 0.220343734  | 0.05954842  | 0.250984367 |
| ENSMUSG00000032496 | Ltf            | -0.039911362 | 0.059725534 | 0.251625232 |
| ENSMUSG00000035112 | Wnk4           | -0.06410006  | 0.059740988 | 0.251625232 |
| ENSMUSG00000025366 | Esy1           | -0.196470477 | 0.059847432 | 0.251988121 |
| ENSMUSG00000055491 | Pprc1          | -0.220137418 | 0.059900128 | 0.25212453  |
| ENSMUSG00000033216 | Eefsec         | -0.158399742 | 0.059935307 | 0.252187145 |
| ENSMUSG00000001211 | Agpat3         | -0.219271478 | 0.060068055 | 0.252660111 |
| ENSMUSG00000021340 | Gpld1          | 0.112744253  | 0.060145195 | 0.252898939 |
| ENSMUSG00000020664 | Dld            | 0.154010984  | 0.060233876 | 0.253101634 |
| ENSMUSG00000030298 | Sec13          | 0.161695175  | 0.060304245 | 0.253101634 |
| ENSMUSG00000030612 | Mrpl46         | 0.196986774  | 0.060336039 | 0.253101634 |
| ENSMUSG00000047649 | Cd3eap         | 0.191749944  | 0.060289359 | 0.253101634 |
| ENSMUSG00000057836 | Xlr3a          | -0.062720814 | 0.06032708  | 0.253101634 |
| ENSMUSG00000072640 | Lym9           | 0.202960961  | 0.060291902 | 0.253101634 |
| ENSMUSG00000096519 | Gm10721        | -0.054966284 | 0.060335863 | 0.253101634 |
| ENSMUSG00000003420 | Fcgrt          | -0.047495788 | 0.06040926  | 0.2532416   |
| ENSMUSG00000029814 | Igf2bp3        | 0.060776702  | 0.060410181 | 0.2532416   |
| ENSMUSG00000027489 | Necab3         | -0.084388138 | 0.060439046 | 0.253277124 |
| ENSMUSG00000022111 | Uchl3          | 0.206018544  | 0.060502206 | 0.253434333 |
| ENSMUSG00000055184 | Fam72a         | 0.219599397  | 0.060517368 | 0.253434333 |

|                    |           |              |             |             |
|--------------------|-----------|--------------|-------------|-------------|
| ENSMUSG00000026203 | Dnajb2    | -0.152498191 | 0.060628959 | 0.253816075 |
| ENSMUSG00000039196 | Orm1      | 0.123883955  | 0.060663513 | 0.253875167 |
| ENSMUSG00000058331 | Zfp85     | -0.171746906 | 0.060734874 | 0.253917157 |
| ENSMUSG00000067767 | Clec4b2   | -0.210857322 | 0.060697444 | 0.253917157 |
| ENSMUSG00000081932 | Gm12331   | 0.110254029  | 0.060721274 | 0.253917157 |
| ENSMUSG00000082806 | Rpl13-ps1 | 0.219492243  | 0.06076835  | 0.253971627 |
| ENSMUSG00000100235 | Gm28557   | -0.124756591 | 0.060932457 | 0.254571827 |
| ENSMUSG00000052435 | Cebpe     | -0.18931772  | 0.061003849 | 0.254784401 |
| ENSMUSG00000031442 | Mcf2l     | -0.207645245 | 0.06107172  | 0.254896448 |
| ENSMUSG00000039852 | Rere      | -0.200091203 | 0.061070515 | 0.254896448 |
| ENSMUSG00000021990 | Spata13   | 0.164034424  | 0.061113653 | 0.254900161 |
| ENSMUSG00000073436 | Eme2      | -0.205356113 | 0.061111203 | 0.254900161 |
| ENSMUSG00000098412 | Gm7870    | 0.099555897  | 0.061146716 | 0.254952455 |
| ENSMUSG00000060275 | Nrg2      | -0.189305872 | 0.061203108 | 0.255101948 |
| ENSMUSG00000096006 | Gm21596   | 0.159710872  | 0.061226932 | 0.25511564  |
| ENSMUSG00000091614 | Gm17657   | -0.104264388 | 0.061411956 | 0.255800771 |
| ENSMUSG00000041841 | Rpl37     | 0.178771248  | 0.061512557 | 0.256133914 |
| ENSMUSG00000029388 | Eif2b1    | 0.174759556  | 0.061568289 | 0.256280066 |
| ENSMUSG00000020385 | Clk4      | -0.183172926 | 0.061692549 | 0.256711273 |
| ENSMUSG00000044447 | Dock5     | 0.214786422  | 0.061785366 | 0.256925352 |
| ENSMUSG00000073434 | Wdr90     | -0.173147025 | 0.061770521 | 0.256925352 |
| ENSMUSG00000041949 | Tango6    | -0.213735955 | 0.061877789 | 0.257187074 |
| ENSMUSG00000066643 | Wdr35     | 0.11365347   | 0.061889716 | 0.257187074 |
| ENSMUSG00000053453 | Thoc7     | 0.153963372  | 0.061926345 | 0.25725322  |
| ENSMUSG00000002329 | Mdp1      | -0.183450298 | 0.061976041 | 0.25737359  |
| ENSMUSG00000031634 | Ufsp2     | 0.19866693   | 0.062109081 | 0.257667634 |
| ENSMUSG00000062846 | Gm14176   | 0.197614637  | 0.062098987 | 0.257667634 |
| ENSMUSG00000079071 | Gm14085   | 0.2178937    | 0.062103338 | 0.257667634 |
| ENSMUSG00000028476 | Reck      | 0.15447964   | 0.062216235 | 0.258025994 |
| ENSMUSG00000009647 | Mcu       | 0.129403683  | 0.062328756 | 0.258248881 |
| ENSMUSG00000079017 | Ifi27l2a  | -0.072034953 | 0.062303274 | 0.258248881 |
| ENSMUSG00000093751 | Gm3307    | 0.096636298  | 0.062332352 | 0.258248881 |
| ENSMUSG00000030201 | Lrp6      | -0.201160415 | 0.062431546 | 0.258573604 |
| ENSMUSG00000024797 | Vps51     | -0.185150001 | 0.062473065 | 0.258659314 |
| ENSMUSG00000061684 | Rpl21-ps8 | 0.204230665  | 0.062679712 | 0.259428426 |
| ENSMUSG00000074238 | Ap1ar     | -0.214136297 | 0.062756688 | 0.259660501 |
| ENSMUSG00000003344 | Btbd2     | -0.164597783 | 0.062832208 | 0.259703051 |
| ENSMUSG00000022564 | Grina     | -0.207989781 | 0.062850605 | 0.259703051 |
| ENSMUSG00000022771 | Ppil2     | -0.18605948  | 0.062793578 | 0.259703051 |
| ENSMUSG00000034902 | Pip5k1c   | -0.199247313 | 0.062809628 | 0.259703051 |
| ENSMUSG00000054766 | Set       | 0.204603622  | 0.062912855 | 0.259873819 |
| ENSMUSG00000030413 | Pglyrp1   | 0.209701263  | 0.062951514 | 0.259938247 |
| ENSMUSG00000034800 | Zfp661    | -0.200223307 | 0.062970307 | 0.259938247 |

|                    |            |              |             |             |
|--------------------|------------|--------------|-------------|-------------|
| ENSMUSG00000013539 | Tango2     | -0.20335161  | 0.063017825 | 0.260006769 |
| ENSMUSG00000015289 | Lage3      | 0.179947237  | 0.063049705 | 0.260006769 |
| ENSMUSG00000035232 | Pdk3       | 0.160726101  | 0.063044418 | 0.260006769 |
| ENSMUSG00000021242 | Npc2       | -0.1757648   | 0.063218182 | 0.260534907 |
| ENSMUSG00000027944 | Hax1       | 0.186518814  | 0.063240701 | 0.260534907 |
| ENSMUSG00000035726 | Supt16     | 0.186485349  | 0.063222485 | 0.260534907 |
| ENSMUSG00000029925 | Tbxas1     | -0.200792245 | 0.063304636 | 0.260625418 |
| ENSMUSG00000037049 | Smpd1      | -0.20631532  | 0.063291756 | 0.260625418 |
| ENSMUSG00000059772 | Slx1b      | 0.177326919  | 0.063411944 | 0.260980703 |
| ENSMUSG00000026942 | Traf2      | -0.212710021 | 0.063486676 | 0.261201723 |
| ENSMUSG00000023027 | Atf1       | 0.186329008  | 0.0635892   | 0.261536907 |
| ENSMUSG00000068706 | Gm10250    | 0.100814627  | 0.063636164 | 0.261643426 |
| ENSMUSG00000040209 | Zfp704     | -0.214168446 | 0.063726167 | 0.261926775 |
| ENSMUSG00000041974 | Spidr      | -0.198170881 | 0.063773781 | 0.262035769 |
| ENSMUSG00000004032 | Gstm5      | 0.196835661  | 0.063953658 | 0.262388131 |
| ENSMUSG00000024534 | Sncaip     | -0.048329617 | 0.063882887 | 0.262388131 |
| ENSMUSG00000040936 | Ulk4       | 0.193903114  | 0.063951581 | 0.262388131 |
| ENSMUSG00000054619 | Mettl7a1   | -0.209735626 | 0.063960225 | 0.262388131 |
| ENSMUSG00000079480 | Pin4       | 0.197906211  | 0.063965161 | 0.262388131 |
| ENSMUSG00000038888 | Ctu1       | -0.207579587 | 0.064021885 | 0.262534116 |
| ENSMUSG00000021115 | Vrk1       | 0.163279209  | 0.064055525 | 0.262579059 |
| ENSMUSG00000117411 | AC132100.1 | 0.116912453  | 0.064075125 | 0.262579059 |
| ENSMUSG00000019975 | Ikkip      | 0.194297676  | 0.064115968 | 0.26261576  |
| ENSMUSG00000022791 | Tnk2       | 0.161466388  | 0.064126367 | 0.26261576  |
| ENSMUSG00000027091 | Zc3h15     | 0.16923934   | 0.064229069 | 0.26286302  |
| ENSMUSG00000082762 | Gm12366    | 0.076630448  | 0.064220052 | 0.26286302  |
| ENSMUSG00000033487 | Fndc3a     | 0.212017815  | 0.064360755 | 0.263290774 |
| ENSMUSG00000093938 | Evi2b      | -0.169565705 | 0.064375983 | 0.263290774 |
| ENSMUSG00000052551 | Adarb2     | 0.118831454  | 0.064450967 | 0.263510686 |
| ENSMUSG00000032783 | Troap      | -0.181226322 | 0.064532481 | 0.263757141 |
| ENSMUSG00000050188 | Lsm10      | -0.180630064 | 0.064557211 | 0.263771422 |
| ENSMUSG00000019853 | Hebp2      | 0.144235624  | 0.064581727 | 0.263784819 |
| ENSMUSG00000003814 | Calr       | 0.206505512  | 0.064763211 | 0.264260337 |
| ENSMUSG00000013646 | Sh3bp5l    | -0.21005801  | 0.064937311 | 0.264260337 |
| ENSMUSG00000015120 | Ube2i      | 0.165724582  | 0.06495345  | 0.264260337 |
| ENSMUSG00000020649 | Rrm2       | 0.159196263  | 0.064729811 | 0.264260337 |
| ENSMUSG00000022324 | Matn2      | -0.211940813 | 0.064828159 | 0.264260337 |
| ENSMUSG00000024835 | Coro1b     | -0.139172276 | 0.064868706 | 0.264260337 |
| ENSMUSG00000025066 | Sfr1       | 0.144111023  | 0.06489842  | 0.264260337 |
| ENSMUSG00000025261 | Huwe1      | 0.211167958  | 0.064947728 | 0.264260337 |
| ENSMUSG00000032484 | Ngp        | -0.099018094 | 0.064930835 | 0.264260337 |
| ENSMUSG00000047767 | Atg16l2    | -0.213243606 | 0.064785015 | 0.264260337 |
| ENSMUSG00000053819 | Camk2d     | 0.20062903   | 0.064750979 | 0.264260337 |

|                    |          |              |             |             |
|--------------------|----------|--------------|-------------|-------------|
| ENSMUSG00000072872 | Rybp     | -0.210973942 | 0.064906829 | 0.264260337 |
| ENSMUSG00000032977 | Fam207a  | 0.163627712  | 0.065254125 | 0.265309815 |
| ENSMUSG00000052776 | Oas1a    | 0.188431407  | 0.065239801 | 0.265309815 |
| ENSMUSG00000017858 | Ift52    | 0.195054004  | 0.065342689 | 0.265582965 |
| ENSMUSG00000027332 | Ivd      | -0.140708902 | 0.06543655  | 0.265877457 |
| ENSMUSG00000031714 | Gab1     | -0.148185385 | 0.065509269 | 0.266085883 |
| ENSMUSG00000027287 | Snap23   | -0.178380781 | 0.065614612 | 0.266339574 |
| ENSMUSG00000029454 | Mapkapk5 | 0.202039181  | 0.065595771 | 0.266339574 |
| ENSMUSG00000029312 | Klhl8    | -0.182703563 | 0.065666448 | 0.266462904 |
| ENSMUSG00000003868 | Ruvbl2   | 0.168299102  | 0.065728884 | 0.266629153 |
| ENSMUSG00000080772 | Gm12543  | 0.098931923  | 0.065765924 | 0.266692309 |
| ENSMUSG00000022285 | Ywhaz    | 0.2127469    | 0.065812804 | 0.266795312 |
| ENSMUSG00000020134 | Peli1    | -0.205303297 | 0.065918934 | 0.266998197 |
| ENSMUSG00000026189 | Pecr     | 0.176948179  | 0.065927338 | 0.266998197 |
| ENSMUSG00000059658 | Gm16379  | 0.091759773  | 0.065900549 | 0.266998197 |
| ENSMUSG00000020919 | Stat5b   | -0.206766352 | 0.06597837  | 0.267117775 |
| ENSMUSG00000030341 | Tnfrsf1a | -0.200260042 | 0.066137157 | 0.267653675 |
| ENSMUSG00000089803 | Gm10171  | 0.200202395  | 0.066153835 | 0.267653675 |
| ENSMUSG00000094955 | Gm3699   | 0.196713348  | 0.066178636 | 0.267666832 |
| ENSMUSG00000019494 | Cops6    | 0.167131902  | 0.066321586 | 0.268070426 |
| ENSMUSG00000033326 | Kdm4a    | -0.155908686 | 0.066310455 | 0.268070426 |
| ENSMUSG00000000959 | Oxa1l    | 0.199650475  | 0.06648876  | 0.268106596 |
| ENSMUSG00000005474 | Myl10    | -0.119115729 | 0.066375355 | 0.268106596 |
| ENSMUSG00000017778 | Cox7c    | 0.181387549  | 0.066370533 | 0.268106596 |
| ENSMUSG00000020389 | Cdkl3    | 0.148209677  | 0.066407368 | 0.268106596 |
| ENSMUSG00000025130 | P4hb     | 0.205872681  | 0.066477648 | 0.268106596 |
| ENSMUSG00000025353 | Ormdl2   | 0.15594202   | 0.066438206 | 0.268106596 |
| ENSMUSG00000066324 | Impad1   | 0.195765991  | 0.066503214 | 0.268106596 |
| ENSMUSG00000078578 | Ube2d3   | 0.162493437  | 0.066468851 | 0.268106596 |
| ENSMUSG00000028524 | Sgip1    | 0.178777384  | 0.066611303 | 0.268455224 |
| ENSMUSG00000022678 | Nde1     | -0.198417391 | 0.066683877 | 0.268641866 |
| ENSMUSG00000054580 | Pla2r1   | 0.067411612  | 0.066700871 | 0.268641866 |
| ENSMUSG00000040414 | Slc25a28 | -0.208436311 | 0.066774147 | 0.268762696 |
| ENSMUSG00000060260 | Pwwp2b   | -0.20940089  | 0.066760255 | 0.268762696 |
| ENSMUSG00000015943 | Bola1    | 0.188115088  | 0.066948804 | 0.269326551 |
| ENSMUSG00000039824 | Myl6b    | -0.162942603 | 0.066957603 | 0.269326551 |
| ENSMUSG00000029290 | Zfp326   | 0.211401644  | 0.066999633 | 0.269368081 |
| ENSMUSG00000041763 | Tpp2     | -0.186100618 | 0.067011301 | 0.269368081 |
| ENSMUSG00000031644 | Nek1     | 0.197296844  | 0.067106147 | 0.269662067 |
| ENSMUSG00000074802 | Gas2l3   | -0.176326537 | 0.067156029 | 0.26977524  |
| ENSMUSG00000025466 | Fuom     | 0.208020044  | 0.067210287 | 0.269785775 |
| ENSMUSG00000056724 | Nbeal2   | -0.163807372 | 0.067223812 | 0.269785775 |
| ENSMUSG00000059323 | Tonsl    | -0.209377444 | 0.067180622 | 0.269785775 |

|                    |          |              |             |             |
|--------------------|----------|--------------|-------------|-------------|
| ENSMUSG00000022372 | Sla      | -0.191517451 | 0.067340522 | 0.270120387 |
| ENSMUSG00000116895 | Gm3435   | -0.194231568 | 0.067350683 | 0.270120387 |
| ENSMUSG00000020413 | Hus1     | 0.208540675  | 0.067426838 | 0.270338527 |
| ENSMUSG00000115505 | Gm9247   | 0.110288906  | 0.067464817 | 0.270403513 |
| ENSMUSG00000002416 | Ndufb2   | 0.163509033  | 0.067588134 | 0.270810392 |
| ENSMUSG00000025732 | Mcrip2   | 0.185550776  | 0.067643306 | 0.27094405  |
| ENSMUSG00000030987 | Stim1    | -0.206553948 | 0.067771542 | 0.271370187 |
| ENSMUSG00000020334 | Slc22a4  | -0.189274928 | 0.067798839 | 0.271392002 |
| ENSMUSG00000023186 | Vwa5a    | -0.175279143 | 0.067903857 | 0.271462441 |
| ENSMUSG00000027552 | E2f5     | -0.208176466 | 0.067890641 | 0.271462441 |
| ENSMUSG00000028703 | Lrrc41   | -0.189034332 | 0.067864056 | 0.271462441 |
| ENSMUSG00000054237 | Fra10ac1 | 0.155251324  | 0.067892021 | 0.271462441 |
| ENSMUSG00000025184 | R3hcc1l  | -0.17781923  | 0.068046562 | 0.271923205 |
| ENSMUSG00000031546 | Gins4    | 0.147881996  | 0.068062897 | 0.271923205 |
| ENSMUSG00000003458 | Ncstn    | -0.199396311 | 0.068361549 | 0.27253759  |
| ENSMUSG00000022667 | Cd200r1  | -0.198867149 | 0.068300574 | 0.27253759  |
| ENSMUSG00000026618 | Iars2    | 0.206121978  | 0.068344369 | 0.27253759  |
| ENSMUSG00000030534 | Vps33b   | -0.188853944 | 0.068316159 | 0.27253759  |
| ENSMUSG00000048965 | Mrgpre   | -0.101251495 | 0.068370271 | 0.27253759  |
| ENSMUSG00000078922 | Tgtp1    | -0.102787018 | 0.06823869  | 0.27253759  |
| ENSMUSG00000082588 | Gm15443  | -0.207945178 | 0.068322677 | 0.27253759  |
| ENSMUSG00000028555 | Ttc39a   | 0.12702587   | 0.068442808 | 0.272739208 |
| ENSMUSG00000022199 | Slc22a17 | -0.122673662 | 0.068594703 | 0.273090894 |
| ENSMUSG00000026815 | Gfi1b    | -0.097467444 | 0.068632206 | 0.273090894 |
| ENSMUSG00000039396 | Neil3    | -0.199624698 | 0.068640993 | 0.273090894 |
| ENSMUSG00000047735 | Samd9l   | 0.200245741  | 0.068622925 | 0.273090894 |
| ENSMUSG00000049225 | Pdp1     | -0.207111507 | 0.068585865 | 0.273090894 |
| ENSMUSG00000031029 | Eif3f    | 0.19964202   | 0.068735445 | 0.273204146 |
| ENSMUSG00000049313 | Sorl1    | 0.166917289  | 0.068706624 | 0.273204146 |
| ENSMUSG00000074738 | Fndc10   | -0.139189161 | 0.068720459 | 0.273204146 |
| ENSMUSG00000034216 | Vps18    | -0.205044057 | 0.068782072 | 0.273214622 |
| ENSMUSG00000116972 | Gm6278   | 0.078926068  | 0.068778301 | 0.273214622 |
| ENSMUSG00000027366 | Sppl2a   | 0.120606889  | 0.068871385 | 0.27330718  |
| ENSMUSG00000028851 | Nudc     | 0.164057643  | 0.068859322 | 0.27330718  |
| ENSMUSG00000051890 | Klhdc1   | -0.124198368 | 0.068843773 | 0.27330718  |
| ENSMUSG00000002372 | Ranbp3   | -0.191124321 | 0.069044396 | 0.273687474 |
| ENSMUSG00000004565 | Pnpla6   | -0.134580013 | 0.069055353 | 0.273687474 |
| ENSMUSG00000005481 | Ddx39    | 0.198181714  | 0.069009356 | 0.273687474 |
| ENSMUSG00000114184 | Gm7143   | 0.092473971  | 0.069041976 | 0.273687474 |
| ENSMUSG00000006005 | Tpr      | 0.215724808  | 0.069132203 | 0.273808653 |
| ENSMUSG00000033253 | Szt2     | 0.163822365  | 0.069174105 | 0.273808653 |
| ENSMUSG00000041117 | Ccdc8    | -0.117965827 | 0.069145389 | 0.273808653 |
| ENSMUSG00000068922 | Msto1    | 0.194764157  | 0.069169898 | 0.273808653 |

|                    |            |              |             |             |
|--------------------|------------|--------------|-------------|-------------|
| ENSMUSG00000116165 | Pdpx       | -0.180092696 | 0.069219552 | 0.273901259 |
| ENSMUSG00000006395 | Hyi        | -0.206541837 | 0.069289711 | 0.274004298 |
| ENSMUSG00000034165 | Ccnd3      | -0.197460587 | 0.069279455 | 0.274004298 |
| ENSMUSG00000025035 | Arl3       | -0.206387342 | 0.069347378 | 0.274026501 |
| ENSMUSG00000042726 | Trafd1     | -0.189032388 | 0.069382053 | 0.274026501 |
| ENSMUSG00000078606 | Gm4070     | -0.207856769 | 0.069383572 | 0.274026501 |
| ENSMUSG00000096171 | Gm8055     | 0.111887901  | 0.069374366 | 0.274026501 |
| ENSMUSG00000031917 | Nip7       | 0.187172779  | 0.069484107 | 0.274336332 |
| ENSMUSG00000078880 | Gm14308    | 0.071224494  | 0.069522999 | 0.274402659 |
| ENSMUSG00000034863 | Ano8       | -0.180232512 | 0.069680388 | 0.274661835 |
| ENSMUSG00000037341 | Slc9a7     | -0.186144529 | 0.069687728 | 0.274661835 |
| ENSMUSG00000039357 | Fut11      | -0.167492921 | 0.069692585 | 0.274661835 |
| ENSMUSG00000052915 | Msl1       | -0.177223955 | 0.069638535 | 0.274661835 |
| ENSMUSG00000074886 | Grk6       | -0.19979064  | 0.069699227 | 0.274661835 |
| ENSMUSG00000050148 | Ubqln2     | -0.186411301 | 0.069740891 | 0.274738854 |
| ENSMUSG00000004567 | Mcoln1     | -0.195994246 | 0.06981272  | 0.274859125 |
| ENSMUSG00000025153 | Fasn       | 0.180505999  | 0.069815678 | 0.274859125 |
| ENSMUSG00000027080 | Med19      | -0.189118466 | 0.069860684 | 0.274921141 |
| ENSMUSG00000068854 | Hist2h2be  | -0.172931138 | 0.069875698 | 0.274921141 |
| ENSMUSG00000062683 | Atp5g2     | 0.190320928  | 0.06989803  | 0.274921924 |
| ENSMUSG00000026434 | Nucks1     | 0.167726306  | 0.069942192 | 0.275008537 |
| ENSMUSG00000063047 | Zfp780b    | -0.20086157  | 0.069966189 | 0.275015834 |
| ENSMUSG00000028232 | Tmem68     | -0.205325244 | 0.070138327 | 0.275343919 |
| ENSMUSG00000036390 | Gadd45a    | 0.197509778  | 0.070135013 | 0.275343919 |
| ENSMUSG00000037438 | Uqcrh-ps1  | 0.056495823  | 0.070099994 | 0.275343919 |
| ENSMUSG00000078503 | Zfp990     | -0.18461074  | 0.070103257 | 0.275343919 |
| ENSMUSG00000074218 | Cox7a1     | 0.143412237  | 0.070184024 | 0.275349262 |
| ENSMUSG00000105558 | Gm5855     | 0.146497577  | 0.070162091 | 0.275349262 |
| ENSMUSG00000054517 | Trim65     | -0.203208957 | 0.070222204 | 0.27541206  |
| ENSMUSG00000081792 | Anp32b-ps1 | 0.103091023  | 0.070251341 | 0.275439366 |
| ENSMUSG00000019256 | Ahr        | -0.126656617 | 0.070354234 | 0.275668751 |
| ENSMUSG00000039745 | Htatip2    | 0.170478103  | 0.070337357 | 0.275668751 |
| ENSMUSG00000022217 | Emc9       | -0.201083755 | 0.070430223 | 0.27581735  |
| ENSMUSG00000028277 | Ube2j1     | 0.182366521  | 0.07043657  | 0.27581735  |
| ENSMUSG00000079003 | Samd1      | -0.204570584 | 0.070523923 | 0.276072375 |
| ENSMUSG00000026670 | Uap1       | -0.136197098 | 0.070696592 | 0.276526299 |
| ENSMUSG00000067203 | H2-K2      | -0.140322968 | 0.070680462 | 0.276526299 |
| ENSMUSG00000091625 | Lsm5       | 0.179408693  | 0.070706668 | 0.276526299 |
| ENSMUSG00000000555 | Itga5      | -0.171498847 | 0.070731725 | 0.276537223 |
| ENSMUSG00000022008 | Gpalpp1    | 0.194894636  | 0.070789583 | 0.276676341 |
| ENSMUSG00000015755 | Tab2       | 0.182870241  | 0.07090998  | 0.276914825 |
| ENSMUSG00000028890 | Mtf1       | 0.193846616  | 0.070920087 | 0.276914825 |
| ENSMUSG00000030122 | Ptms       | -0.087961476 | 0.070931203 | 0.276914825 |

|                    |               |              |             |             |
|--------------------|---------------|--------------|-------------|-------------|
| ENSMUSG00000033793 | Atp6v1h       | 0.158165437  | 0.070939777 | 0.276914825 |
| ENSMUSG00000116673 | A630089N07Rik | -0.201982339 | 0.070974805 | 0.276964514 |
| ENSMUSG00000039908 | Slc26a11      | -0.089599497 | 0.071062963 | 0.277221441 |
| ENSMUSG00000029373 | Pf4           | 0.188648449  | 0.071223369 | 0.277759957 |
| ENSMUSG00000031860 | Pbx4          | -0.200103664 | 0.071306729 | 0.27793246  |
| ENSMUSG00000102051 | I830127L07Rik | -0.188570454 | 0.071312354 | 0.27793246  |
| ENSMUSG00000005936 | Kctd20        | -0.186518841 | 0.071486484 | 0.27843638  |
| ENSMUSG00000060034 | Ctf2          | -0.196140119 | 0.071466531 | 0.27843638  |
| ENSMUSG00000027774 | Gfm1          | 0.176515537  | 0.071562787 | 0.2786462   |
| ENSMUSG00000038271 | Iffo1         | -0.19021845  | 0.071600598 | 0.278706058 |
| ENSMUSG00000037958 | Nsrp1         | 0.186444816  | 0.07164586  | 0.27879487  |
| ENSMUSG00000003531 | Dgcr6         | 0.178031942  | 0.071765421 | 0.279012788 |
| ENSMUSG00000015766 | Eps8          | 0.183301367  | 0.07176925  | 0.279012788 |
| ENSMUSG00000090000 | Ier3ip1       | 0.166154893  | 0.071766215 | 0.279012788 |
| ENSMUSG00000024785 | Rcl1          | 0.156197571  | 0.071799918 | 0.279044675 |
| ENSMUSG00000035678 | Tnfsf9        | -0.179709567 | 0.07185004  | 0.279152125 |
| ENSMUSG00000005362 | Crbn          | 0.178253649  | 0.071906428 | 0.279196542 |
| ENSMUSG00000024076 | Vit           | 0.090802344  | 0.071892131 | 0.279196542 |
| ENSMUSG00000022351 | Sqle          | -0.202087219 | 0.072025369 | 0.279396347 |
| ENSMUSG00000029538 | Srsf9         | 0.139328132  | 0.072005887 | 0.279396347 |
| ENSMUSG00000042198 | Chchd7        | 0.175203368  | 0.072002817 | 0.279396347 |
| ENSMUSG00000028893 | Sesn2         | -0.197239769 | 0.072048647 | 0.279399388 |
| ENSMUSG00000070697 | Utp3          | 0.171466794  | 0.072073439 | 0.279408296 |
| ENSMUSG00000005043 | Sgsh          | -0.188543598 | 0.072291048 | 0.279553895 |
| ENSMUSG00000020532 | Acaca         | 0.122294028  | 0.072251723 | 0.279553895 |
| ENSMUSG00000020792 | Exoc7         | -0.193439867 | 0.072256537 | 0.279553895 |
| ENSMUSG00000021285 | Ppp1r13b      | -0.160637045 | 0.072226981 | 0.279553895 |
| ENSMUSG00000030695 | Aldoa         | 0.164164335  | 0.07227747  | 0.279553895 |
| ENSMUSG00000043131 | Mob1a         | 0.168839397  | 0.072224606 | 0.279553895 |
| ENSMUSG00000051391 | Ywhag         | 0.205318258  | 0.072248816 | 0.279553895 |
| ENSMUSG00000082927 | Gm5863        | 0.102444658  | 0.0721385   | 0.279553895 |
| ENSMUSG00000051439 | Cd14          | -0.181653734 | 0.072396983 | 0.279794271 |
| ENSMUSG00000074994 | Qser1         | 0.164991449  | 0.07239826  | 0.279794271 |
| ENSMUSG00000080885 | Rpl10-ps6     | 0.093994472  | 0.07246605  | 0.279969147 |
| ENSMUSG00000024687 | Osbp          | -0.19425332  | 0.072732553 | 0.280562435 |
| ENSMUSG00000031066 | Usp11         | -0.191808046 | 0.072653325 | 0.280562435 |
| ENSMUSG00000037692 | Ahdc1         | -0.202791602 | 0.072704782 | 0.280562435 |
| ENSMUSG00000049832 | Rbx1-ps       | 0.155813846  | 0.072719818 | 0.280562435 |
| ENSMUSG00000066838 | Zfp772        | -0.202323753 | 0.072708935 | 0.280562435 |
| ENSMUSG00000034480 | Diaph2        | -0.182535578 | 0.072869604 | 0.280928594 |
| ENSMUSG00000062248 | Cks2          | 0.170431868  | 0.07287271  | 0.280928594 |
| ENSMUSG00000003660 | Snrnp200      | 0.15198205   | 0.072905724 | 0.280968664 |
| ENSMUSG00000022075 | Rhobtb2       | -0.202380756 | 0.073088965 | 0.281500165 |

|                    |          |              |             |             |
|--------------------|----------|--------------|-------------|-------------|
| ENSMUSG00000036820 | Amdhd2   | 0.153728397  | 0.073078096 | 0.281500165 |
| ENSMUSG00000005583 | Mef2c    | 0.201074394  | 0.073237622 | 0.281608171 |
| ENSMUSG00000021910 | Nisch    | -0.194572824 | 0.073216989 | 0.281608171 |
| ENSMUSG00000025899 | Alkbh8   | -0.184667152 | 0.07319695  | 0.281608171 |
| ENSMUSG00000029203 | Ube2k    | 0.139044757  | 0.073190307 | 0.281608171 |
| ENSMUSG00000050029 | Rap2c    | 0.200612992  | 0.073253039 | 0.281608171 |
| ENSMUSG00000071649 | B3gat3   | -0.194817405 | 0.073218727 | 0.281608171 |
| ENSMUSG00000020015 | Cdk17    | -0.201027357 | 0.073561235 | 0.282314706 |
| ENSMUSG00000022768 | Ccdc116  | 0.080639536  | 0.073573199 | 0.282314706 |
| ENSMUSG00000027580 | Helz2    | -0.11900687  | 0.073560972 | 0.282314706 |
| ENSMUSG00000031776 | Arl2bp   | -0.200674934 | 0.073464685 | 0.282314706 |
| ENSMUSG00000032705 | Exd2     | -0.189669734 | 0.073537496 | 0.282314706 |
| ENSMUSG00000035000 | Dpp4     | -0.12394308  | 0.073558959 | 0.282314706 |
| ENSMUSG00000024855 | Pacs1    | -0.195639836 | 0.073660093 | 0.282473606 |
| ENSMUSG00000079260 | Tmppe    | -0.197702386 | 0.073645021 | 0.282473606 |
| ENSMUSG00000019066 | Rab3d    | -0.197037022 | 0.073800136 | 0.282870611 |
| ENSMUSG00000026200 | Glb1l    | -0.200302861 | 0.07383194  | 0.282870611 |
| ENSMUSG00000028861 | Mrps15   | 0.157989776  | 0.073810713 | 0.282870611 |
| ENSMUSG00000033596 | Rfwd3    | -0.178282063 | 0.073882388 | 0.282976607 |
| ENSMUSG00000028161 | Ppp3ca   | -0.191104978 | 0.073919414 | 0.28301635  |
| ENSMUSG00000030403 | Vasp     | -0.179695617 | 0.07396112  | 0.28301635  |
| ENSMUSG00000063535 | Zfp773   | -0.201866627 | 0.073958033 | 0.28301635  |
| ENSMUSG00000020184 | Mdm2     | -0.163984989 | 0.074037039 | 0.283049757 |
| ENSMUSG00000022475 | Hdac7    | 0.188067293  | 0.073993762 | 0.283049757 |
| ENSMUSG00000043940 | Wdfy3    | -0.19098367  | 0.074038214 | 0.283049757 |
| ENSMUSG00000020220 | Vps13d   | 0.149281462  | 0.074108994 | 0.283170767 |
| ENSMUSG00000037617 | Spag1    | -0.078151729 | 0.074115463 | 0.283170767 |
| ENSMUSG00000003604 | Aven     | 0.169728324  | 0.074176053 | 0.283228023 |
| ENSMUSG00000031924 | Cyb5b    | 0.180531926  | 0.074160386 | 0.283228023 |
| ENSMUSG00000068739 | Sars     | 0.164185356  | 0.074306006 | 0.283606158 |
| ENSMUSG00000095687 | Rnaset2a | 0.186724482  | 0.074320751 | 0.283606158 |
| ENSMUSG00000026110 | Mgat4a   | 0.115986218  | 0.07435579  | 0.283652724 |
| ENSMUSG00000030084 | Plxna1   | -0.04417263  | 0.074383661 | 0.283671923 |
| ENSMUSG00000005615 | Pcyt1a   | 0.164779045  | 0.074417266 | 0.28371297  |
| ENSMUSG00000005505 | Kbtbd4   | -0.193624729 | 0.074532553 | 0.283761807 |
| ENSMUSG00000005683 | Cs       | 0.166831075  | 0.07450868  | 0.283761807 |
| ENSMUSG00000015659 | Serac1   | -0.093517946 | 0.074495211 | 0.283761807 |
| ENSMUSG00000025403 | Shmt2    | 0.144073642  | 0.074567147 | 0.283761807 |
| ENSMUSG00000032458 | Copb2    | 0.182983283  | 0.074475352 | 0.283761807 |
| ENSMUSG00000044678 | Ly6k     | -0.095020053 | 0.074562707 | 0.283761807 |
| ENSMUSG00000042406 | Atf4     | 0.18930435   | 0.074625956 | 0.283898623 |
| ENSMUSG00000078670 | Fam174b  | -0.162470481 | 0.074659657 | 0.283939864 |
| ENSMUSG00000063652 | Slc22a21 | -0.089420956 | 0.074728683 | 0.284115387 |

|                     |           |              |             |             |
|---------------------|-----------|--------------|-------------|-------------|
| ENSMUSG00000001270  | Ckb       | -0.105022391 | 0.074780924 | 0.284227005 |
| ENSMUSG00000003166  | Dgcr2     | -0.201109317 | 0.074919626 | 0.284319181 |
| ENSMUSG000000032308 | Ulk3      | -0.127775977 | 0.074895588 | 0.284319181 |
| ENSMUSG000000045763 | Basp1     | 0.129768094  | 0.074911767 | 0.284319181 |
| ENSMUSG000000095609 | Gm21188   | -0.196117451 | 0.074883986 | 0.284319181 |
| ENSMUSG000000098121 | Gm27038   | -0.145942592 | 0.074899492 | 0.284319181 |
| ENSMUSG000000042677 | Zc3h12a   | -0.191732313 | 0.075062814 | 0.284775568 |
| ENSMUSG000000032561 | Acpp      | 0.121996291  | 0.075096091 | 0.284814825 |
| ENSMUSG000000005514 | Por       | -0.166692056 | 0.075145796 | 0.284829397 |
| ENSMUSG000000033589 | Reep4     | -0.184293358 | 0.075125621 | 0.284829397 |
| ENSMUSG000000033099 | Nol12     | 0.164010152  | 0.075212927 | 0.284996878 |
| ENSMUSG00000104864  | Gm43655   | 0.194649468  | 0.075324366 | 0.2853321   |
| ENSMUSG000000037353 | Letmd1    | -0.19682321  | 0.075417237 | 0.285509754 |
| ENSMUSG000000042747 | Krtcap2   | 0.169220392  | 0.075415124 | 0.285509754 |
| ENSMUSG000000031880 | Rrad      | -0.114653061 | 0.075520166 | 0.285725245 |
| ENSMUSG000000057649 | Brd9      | -0.159421893 | 0.075501568 | 0.285725245 |
| ENSMUSG000000028064 | Sema4a    | -0.188938139 | 0.07557451  | 0.285843786 |
| ENSMUSG000000063273 | Naa15     | 0.201248793  | 0.075607104 | 0.28588001  |
| ENSMUSG000000021895 | Arhgef3   | -0.195748588 | 0.075676205 | 0.285967188 |
| ENSMUSG000000052369 | Tmem106c  | -0.191360641 | 0.07565449  | 0.285967188 |
| ENSMUSG000000009079 | Ewsr1     | -0.176714194 | 0.075767612 | 0.286218974 |
| ENSMUSG000000044456 | Rin3      | -0.170113181 | 0.075788922 | 0.286218974 |
| ENSMUSG000000021951 | Eef1akmt1 | 0.14716476   | 0.075837519 | 0.28622845  |
| ENSMUSG000000031986 | Sprtn     | 0.146650533  | 0.075836803 | 0.28622845  |
| ENSMUSG000000023067 | Cdkn1a    | -0.186155588 | 0.075952768 | 0.286527909 |
| ENSMUSG000000026832 | Cytip     | 0.164068512  | 0.07598428  | 0.286527909 |
| ENSMUSG000000081476 | ltpa-ps1  | -0.10553968  | 0.075996811 | 0.286527909 |
| ENSMUSG000000089704 | Galnt2    | 0.126659726  | 0.076009135 | 0.286527909 |
| ENSMUSG000000018238 | Gdf9      | -0.077390206 | 0.07611023  | 0.286578448 |
| ENSMUSG000000020755 | Sap30bp   | 0.172104373  | 0.076066913 | 0.286578448 |
| ENSMUSG000000028048 | Gba       | 0.140343363  | 0.076133069 | 0.286578448 |
| ENSMUSG000000048897 | Zfp710    | -0.198767957 | 0.076133359 | 0.286578448 |
| ENSMUSG000000052751 | Repin1    | -0.199064011 | 0.076137902 | 0.286578448 |
| ENSMUSG000000031696 | Vps35     | 0.18969594   | 0.076250297 | 0.286914551 |
| ENSMUSG000000001053 | N4bp3     | -0.134260014 | 0.07643962  | 0.287406301 |
| ENSMUSG000000025894 | Aasdhpt   | 0.170101309  | 0.076414452 | 0.287406301 |
| ENSMUSG000000031246 | Sh3bgrl   | -0.186152117 | 0.076473539 | 0.287406301 |
| ENSMUSG000000041954 | Tnfrsf18  | -0.198367947 | 0.076458126 | 0.287406301 |
| ENSMUSG000000078440 | Dohh      | 0.182507776  | 0.076515057 | 0.287475355 |
| ENSMUSG000000005981 | Trap1     | 0.143556766  | 0.076605304 | 0.28764041  |
| ENSMUSG000000037824 | Tspan14   | -0.175953621 | 0.07658583  | 0.28764041  |
| ENSMUSG000000073131 | Vma21     | 0.197927007  | 0.076668831 | 0.287791946 |
| ENSMUSG000000036120 | Rfxank    | -0.189453013 | 0.076804054 | 0.288088794 |

|                    |               |              |             |             |
|--------------------|---------------|--------------|-------------|-------------|
| ENSMUSG00000039231 | Suv39h1       | -0.158007085 | 0.076838468 | 0.288088794 |
| ENSMUSG00000039633 | Lonrf1        | 0.116407241  | 0.076840687 | 0.288088794 |
| ENSMUSG00000069744 | Psemb3        | 0.173391811  | 0.076801494 | 0.288088794 |
| ENSMUSG00000032112 | Trappc4       | 0.146299719  | 0.076914397 | 0.288139753 |
| ENSMUSG00000055839 | Elob          | 0.144668254  | 0.076923873 | 0.288139753 |
| ENSMUSG00000056383 | Al987944      | -0.168560651 | 0.07687948  | 0.288139753 |
| ENSMUSG00000035455 | Figl1         | -0.182617289 | 0.077035441 | 0.288383729 |
| ENSMUSG00000097411 | B430218F22Rik | -0.164785507 | 0.077021386 | 0.288383729 |
| ENSMUSG00000022322 | Shcbp1        | -0.168353973 | 0.077064202 | 0.288404475 |
| ENSMUSG00000059878 | Zfp422        | -0.172966583 | 0.077099126 | 0.288448266 |
| ENSMUSG00000048406 | B330016D10Rik | -0.17840223  | 0.077179852 | 0.288663335 |
| ENSMUSG00000020935 | Dcakd         | -0.184167072 | 0.077301887 | 0.288957366 |
| ENSMUSG00000058192 | Zfp846        | -0.194786631 | 0.077328257 | 0.288957366 |
| ENSMUSG00000098050 | Gm5345        | 0.135804013  | 0.077322469 | 0.288957366 |
| ENSMUSG00000000600 | Krit1         | -0.158874724 | 0.077357441 | 0.288979481 |
| ENSMUSG00000036632 | Alg5          | 0.170733566  | 0.07745322  | 0.289250283 |
| ENSMUSG00000060128 | Gm2710        | 0.09968366   | 0.077515848 | 0.289397158 |
| ENSMUSG00000015869 | Prpsap1       | -0.179865133 | 0.077591923 | 0.289535169 |
| ENSMUSG00000018196 | Glr2          | 0.14839367   | 0.077599435 | 0.289535169 |
| ENSMUSG00000117679 | Apbb3         | -0.195232512 | 0.077649057 | 0.289633316 |
| ENSMUSG00000055652 | Klhl25        | -0.196761356 | 0.077689416 | 0.289696859 |
| ENSMUSG00000003581 | Rnf215        | -0.188752736 | 0.077967866 | 0.2901399   |
| ENSMUSG00000005881 | Ergic3        | 0.170898771  | 0.077913764 | 0.2901399   |
| ENSMUSG00000032300 | 1700017B05Rik | -0.179889382 | 0.07797174  | 0.2901399   |
| ENSMUSG00000052337 | Immt          | 0.141820798  | 0.077932814 | 0.2901399   |
| ENSMUSG00000058715 | Fcer1g        | -0.177545117 | 0.077832032 | 0.2901399   |
| ENSMUSG00000070394 | Tmem256       | 0.142832864  | 0.077858089 | 0.2901399   |
| ENSMUSG00000079036 | Alkbh1        | -0.186365126 | 0.077958724 | 0.2901399   |
| ENSMUSG00000090083 | Rnf8          | -0.184430074 | 0.07802396  | 0.29024726  |
| ENSMUSG00000033940 | Brk1          | 0.187782115  | 0.078047991 | 0.290249728 |
| ENSMUSG00000025094 | Slc18a2       | -0.187349728 | 0.078103791 | 0.290370304 |
| ENSMUSG00000007480 | Mc5r          | -0.09195777  | 0.078142052 | 0.290425624 |
| ENSMUSG00000020132 | Rab21         | -0.195969614 | 0.07824851  | 0.290734293 |
| ENSMUSG00000017607 | Tns4          | -0.19128661  | 0.078338252 | 0.290905752 |
| ENSMUSG00000029468 | P2rx7         | -0.193198558 | 0.078364254 | 0.290905752 |
| ENSMUSG00000069083 | Gm10259       | -0.195135918 | 0.078364918 | 0.290905752 |
| ENSMUSG00000007038 | Neu1          | 0.189026223  | 0.078601339 | 0.290998345 |
| ENSMUSG00000027166 | Dnajc24       | 0.175284604  | 0.078595227 | 0.290998345 |
| ENSMUSG00000031441 | Atp11a        | 0.144257457  | 0.078501843 | 0.290998345 |
| ENSMUSG00000031520 | Vegfc         | -0.05703774  | 0.078570193 | 0.290998345 |
| ENSMUSG00000031662 | Snx20         | -0.162267316 | 0.078613896 | 0.290998345 |
| ENSMUSG00000032666 | 1700025G04Rik | -0.184405698 | 0.078458112 | 0.290998345 |
| ENSMUSG00000039671 | Zmynd8        | 0.165128549  | 0.07851131  | 0.290998345 |

|                    |         |              |             |             |
|--------------------|---------|--------------|-------------|-------------|
| ENSMUSG00000041161 | Otud3   | 0.192024899  | 0.07862414  | 0.290998345 |
| ENSMUSG00000056069 | Otulinl | -0.194907013 | 0.07852224  | 0.290998345 |
| ENSMUSG00000108100 | Gm5876  | 0.134033364  | 0.078577838 | 0.290998345 |
| ENSMUSG00000073647 | Gm10557 | -0.182984409 | 0.07865368  | 0.291020958 |
| ENSMUSG00000051390 | Zbtb22  | -0.173096065 | 0.078854051 | 0.291588619 |
| ENSMUSG00000082107 | Gm16216 | 0.150293836  | 0.078830905 | 0.291588619 |
| ENSMUSG00000026170 | Cyp27a1 | -0.122002805 | 0.078899859 | 0.291671175 |
| ENSMUSG00000054400 | Cklf    | -0.16228143  | 0.079088328 | 0.292280905 |
| ENSMUSG00000061244 | Exoc5   | 0.166313811  | 0.079208127 | 0.29263657  |
| ENSMUSG00000030471 | Zdhhc13 | -0.172414057 | 0.079274378 | 0.292707208 |
| ENSMUSG00000038803 | Ost4    | 0.144668451  | 0.079259774 | 0.292707208 |
| ENSMUSG00000006717 | Acot13  | 0.153493635  | 0.079384054 | 0.292938006 |
| ENSMUSG00000066036 | Ubr4    | 0.182267824  | 0.079364653 | 0.292938006 |
| ENSMUSG00000019055 | Plod1   | -0.194885526 | 0.079508237 | 0.293309121 |
| ENSMUSG00000053475 | Tnfaip6 | 0.099500316  | 0.079573049 | 0.293461057 |
| ENSMUSG00000020167 | Tcf3    | -0.192288518 | 0.079613446 | 0.293522888 |
| ENSMUSG00000062014 | Gmfb    | 0.192374267  | 0.079658782 | 0.293602889 |
| ENSMUSG00000020114 | Cand1   | -0.192468588 | 0.079749837 | 0.293731052 |
| ENSMUSG00000028692 | Akr1a1  | 0.158496162  | 0.079759363 | 0.293731052 |
| ENSMUSG00000054280 | Prr14l  | -0.183758142 | 0.079764499 | 0.293731052 |
| ENSMUSG00000034190 | Chmp7   | -0.18329593  | 0.079856381 | 0.29398225  |
| ENSMUSG00000043419 | Rnf227  | -0.178975736 | 0.079996204 | 0.294311826 |
| ENSMUSG00000071359 | Tbpl1   | 0.151344432  | 0.08001699  | 0.294311826 |
| ENSMUSG00000074212 | Dnajb14 | -0.178394663 | 0.079990885 | 0.294311826 |
| ENSMUSG00000013701 | Timm23  | 0.173115151  | 0.080050368 | 0.294347429 |
| ENSMUSG00000020456 | Ogdh    | -0.188921216 | 0.080148165 | 0.294372212 |
| ENSMUSG00000028840 | Zfp593  | 0.152948365  | 0.080100851 | 0.294372212 |
| ENSMUSG00000030530 | Furin   | -0.18934679  | 0.080151906 | 0.294372212 |
| ENSMUSG00000067199 | Frat1   | -0.14849694  | 0.080142419 | 0.294372212 |
| ENSMUSG00000045598 | Zfp553  | -0.188141339 | 0.080211383 | 0.294503574 |
| ENSMUSG00000039286 | Fndc3b  | -0.192478278 | 0.080311845 | 0.294785293 |
| ENSMUSG00000043091 | Tuba1c  | 0.193807625  | 0.080389458 | 0.29491556  |
| ENSMUSG00000078300 | Gm2606  | -0.134366402 | 0.080394822 | 0.29491556  |
| ENSMUSG00000017721 | Pigt    | -0.181163633 | 0.080505279 | 0.295192757 |
| ENSMUSG00000027282 | Mtch2   | 0.172950123  | 0.080517918 | 0.295192757 |
| ENSMUSG00000068823 | Csde1   | -0.160185728 | 0.080604765 | 0.295423955 |
| ENSMUSG00000037337 | Map4k1  | 0.156421269  | 0.08063548  | 0.29544935  |
| ENSMUSG00000029616 | Erp29   | 0.180267305  | 0.080698557 | 0.295593268 |
| ENSMUSG00000054452 | Aes     | -0.194003182 | 0.080782857 | 0.29581482  |
| ENSMUSG00000037926 | Ssh2    | -0.140951431 | 0.080809355 | 0.295824638 |
| ENSMUSG00000008604 | Ubqln4  | -0.153157973 | 0.080997382 | 0.296338285 |
| ENSMUSG00000026049 | Tex30   | 0.170353559  | 0.080992502 | 0.296338285 |
| ENSMUSG00000025779 | Ly96    | -0.192495438 | 0.081047143 | 0.296414002 |

|                    |           |              |             |             |
|--------------------|-----------|--------------|-------------|-------------|
| ENSMUSG00000027245 | Hypk      | 0.173022973  | 0.081065805 | 0.296414002 |
| ENSMUSG00000094870 | Zfp131    | -0.166437597 | 0.081125759 | 0.296545925 |
| ENSMUSG00000039263 | Npepl1    | -0.193510294 | 0.081232266 | 0.296785884 |
| ENSMUSG00000045948 | Mrps12    | 0.144636023  | 0.081239192 | 0.296785884 |
| ENSMUSG00000000318 | Clec10a   | -0.190707844 | 0.081372454 | 0.297024129 |
| ENSMUSG00000024787 | Snx15     | -0.175323075 | 0.081355029 | 0.297024129 |
| ENSMUSG00000028656 | Cap1      | -0.179437001 | 0.081376146 | 0.297024129 |
| ENSMUSG00000026675 | Hsd17b7   | 0.195993891  | 0.081481581 | 0.29723428  |
| ENSMUSG00000027439 | Gzf1      | 0.193564654  | 0.081481103 | 0.29723428  |
| ENSMUSG00000031930 | Wwp2      | -0.191610282 | 0.081643809 | 0.297738624 |
| ENSMUSG00000055745 | Rtl6      | -0.136009152 | 0.081747556 | 0.297942015 |
| ENSMUSG00000097973 | Gm4929    | 0.09669679   | 0.081746965 | 0.297942015 |
| ENSMUSG00000020415 | Pttg1     | 0.170990233  | 0.081838286 | 0.298185201 |
| ENSMUSG00000026694 | Mettl13   | -0.187888022 | 0.081940474 | 0.29846998  |
| ENSMUSG00000040712 | Camta2    | -0.141096625 | 0.082023469 | 0.298684699 |
| ENSMUSG00000018537 | Pcgf2     | -0.192347182 | 0.082119126 | 0.298857907 |
| ENSMUSG00000028700 | Pomgnt1   | -0.185532505 | 0.082132727 | 0.298857907 |
| ENSMUSG00000031333 | Abcb7     | 0.186070636  | 0.082143217 | 0.298857907 |
| ENSMUSG00000069089 | Cdk7      | 0.165301727  | 0.082189368 | 0.298938256 |
| ENSMUSG00000020300 | Cpeb4     | 0.075637708  | 0.082467688 | 0.299163365 |
| ENSMUSG00000022858 | Tra2b     | -0.175607248 | 0.082470853 | 0.299163365 |
| ENSMUSG00000025231 | Sufu      | -0.132650087 | 0.082342493 | 0.299163365 |
| ENSMUSG00000027466 | Rbck1     | -0.180683115 | 0.082530579 | 0.299163365 |
| ENSMUSG00000028759 | Hp1bp3    | 0.193875424  | 0.082520231 | 0.299163365 |
| ENSMUSG00000033335 | Dnm2      | -0.195549588 | 0.082524813 | 0.299163365 |
| ENSMUSG00000034101 | Ctnnd1    | 0.164043871  | 0.082463669 | 0.299163365 |
| ENSMUSG00000038374 | Rbm8a     | 0.15476494   | 0.082488747 | 0.299163365 |
| ENSMUSG00000042185 | Nfrkb     | 0.153037723  | 0.082382461 | 0.299163365 |
| ENSMUSG00000063253 | Scoc      | 0.182061316  | 0.082489854 | 0.299163365 |
| ENSMUSG00000071253 | Slc25a16  | 0.187739338  | 0.08255417  | 0.299163365 |
| ENSMUSG00000078771 | Evi2a     | 0.165156615  | 0.082534473 | 0.299163365 |
| ENSMUSG00000082035 | Rpl17-ps8 | 0.170161645  | 0.082564368 | 0.299163365 |
| ENSMUSG00000032526 | Ss18l2    | 0.164830032  | 0.082599047 | 0.29920174  |
| ENSMUSG00000032265 | Tent5a    | -0.164972159 | 0.082698946 | 0.299476271 |
| ENSMUSG00000030672 | Mylpf     | 0.189670906  | 0.082786668 | 0.299706559 |
| ENSMUSG00000046909 | Tefm      | 0.177767743  | 0.0828194   | 0.299726842 |
| ENSMUSG00000114064 | Gm9370    | 0.103429508  | 0.082840532 | 0.299726842 |
| ENSMUSG00000001833 | Sept7     | 0.12159036   | 0.082917094 | 0.299871815 |
| ENSMUSG00000005672 | Kit       | -0.18787737  | 0.08304246  | 0.299871815 |
| ENSMUSG00000013846 | St3gal1   | -0.180168852 | 0.083073739 | 0.299871815 |
| ENSMUSG00000023973 | Cnpy3     | -0.150257824 | 0.083023783 | 0.299871815 |
| ENSMUSG00000024486 | Hbegf     | -0.102037323 | 0.083037191 | 0.299871815 |
| ENSMUSG00000035142 | Nubpl     | 0.179009687  | 0.082975575 | 0.299871815 |

|                    |            |              |             |             |
|--------------------|------------|--------------|-------------|-------------|
| ENSMUSG00000063511 | Snrnp70    | 0.181744549  | 0.083038625 | 0.299871815 |
| ENSMUSG00000083482 | Gm14706    | 0.169064923  | 0.083059676 | 0.299871815 |
| ENSMUSG00000022841 | Ap2m1      | -0.196964888 | 0.083111102 | 0.299919523 |
| ENSMUSG00000067430 | Zfp763     | -0.175362147 | 0.083212797 | 0.30019929  |
| ENSMUSG00000025355 | Mmp19      | -0.158173209 | 0.083278964 | 0.300350759 |
| ENSMUSG00000052331 | Ankrd44    | -0.189787095 | 0.083316311 | 0.300398231 |
| ENSMUSG00000013160 | Atp6v0d1   | -0.192180413 | 0.083384683 | 0.300557499 |
| ENSMUSG00000031155 | Pim2       | -0.174699492 | 0.083623093 | 0.3013294   |
| ENSMUSG00000020387 | Jade2      | 0.136769437  | 0.083740296 | 0.301664215 |
| ENSMUSG00000001166 | Oas1c      | 0.077583603  | 0.083887959 | 0.302108535 |
| ENSMUSG00000026271 | Gpr35      | -0.063394944 | 0.083991446 | 0.302302347 |
| ENSMUSG00000057101 | Zfp180     | -0.189759369 | 0.084063466 | 0.302302347 |
| ENSMUSG00000075600 | Zc3h3      | -0.111165683 | 0.084042246 | 0.302302347 |
| ENSMUSG00000081219 | Bambi-ps1  | 0.112119619  | 0.08400607  | 0.302302347 |
| ENSMUSG00000110686 | Gm45855    | 0.070668532  | 0.08404202  | 0.302302347 |
| ENSMUSG00000027281 | Slx4ip     | -0.190615613 | 0.084169898 | 0.302597484 |
| ENSMUSG00000058454 | Dhcr7      | -0.17711043  | 0.084359403 | 0.303191016 |
| ENSMUSG00000050138 | Kcnk12     | -0.185437633 | 0.084385271 | 0.303196254 |
| ENSMUSG00000041774 | Ydjc       | 0.190263054  | 0.084560554 | 0.303738183 |
| ENSMUSG00000002489 | Tiam1      | -0.186839327 | 0.084652904 | 0.303981994 |
| ENSMUSG00000003527 | Ess2       | -0.163308785 | 0.084769839 | 0.304231124 |
| ENSMUSG00000028920 | Fbxo42     | -0.190651441 | 0.084771268 | 0.304231124 |
| ENSMUSG00000027654 | Fam83d     | -0.185163059 | 0.084810186 | 0.304282878 |
| ENSMUSG00000101652 | Gm6060     | 0.132294925  | 0.084901718 | 0.304523316 |
| ENSMUSG00000031934 | Panx1      | -0.151984349 | 0.08496938  | 0.304585659 |
| ENSMUSG00000038910 | Plcl2      | -0.176921176 | 0.084992665 | 0.304585659 |
| ENSMUSG00000039834 | Zfp335     | -0.18035891  | 0.084991544 | 0.304585659 |
| ENSMUSG00000019996 | Map7       | -0.187582898 | 0.08504352  | 0.304679999 |
| ENSMUSG00000038517 | Tbkbp1     | -0.108506192 | 0.08510328  | 0.304718318 |
| ENSMUSG00000041220 | Elovl6     | 0.190812338  | 0.085098372 | 0.304718318 |
| ENSMUSG00000006676 | Usp19      | -0.18792216  | 0.085158003 | 0.304826384 |
| ENSMUSG00000056899 | Immp2l     | -0.187330527 | 0.085321856 | 0.305324912 |
| ENSMUSG00000029649 | Pomp       | 0.171725165  | 0.085415957 | 0.305485634 |
| ENSMUSG00000039219 | Arid4b     | -0.17756518  | 0.085413919 | 0.305485634 |
| ENSMUSG00000030019 | Fbxl14     | -0.189020409 | 0.085445703 | 0.305504051 |
| ENSMUSG00000023939 | Mrpl14     | 0.140126179  | 0.08548925  | 0.305511112 |
| ENSMUSG00000034845 | Plvap      | -0.115597707 | 0.085546063 | 0.305511112 |
| ENSMUSG00000090019 | Gimap1     | -0.122417958 | 0.085497643 | 0.305511112 |
| ENSMUSG00000117165 | AC123659.1 | 0.190936373  | 0.085531837 | 0.305511112 |
| ENSMUSG00000015363 | Trabd      | -0.172605042 | 0.085637668 | 0.305750352 |
| ENSMUSG00000017428 | Psm11      | 0.181023052  | 0.08573115  | 0.305996154 |
| ENSMUSG00000034271 | Jdp2       | 0.184400616  | 0.085778263 | 0.306076357 |
| ENSMUSG00000023960 | Enpp5      | -0.188457004 | 0.085876141 | 0.306337609 |

|                    |               |              |             |             |
|--------------------|---------------|--------------|-------------|-------------|
| ENSMUSG00000074412 | Gm10689       | 0.082326201  | 0.085928959 | 0.306438012 |
| ENSMUSG00000030816 | Rnf40         | -0.183485604 | 0.085959971 | 0.306460621 |
| ENSMUSG00000002981 | Clptm1        | -0.187612672 | 0.086186789 | 0.306572653 |
| ENSMUSG00000023473 | Celsr3        | -0.112578109 | 0.08610034  | 0.306572653 |
| ENSMUSG00000024561 | Mbd1          | -0.186284396 | 0.086177247 | 0.306572653 |
| ENSMUSG00000028030 | Tbck          | -0.16854243  | 0.08618885  | 0.306572653 |
| ENSMUSG00000031901 | Dus2          | -0.157470318 | 0.086088856 | 0.306572653 |
| ENSMUSG00000034620 | Rxylt1        | 0.183617121  | 0.086084285 | 0.306572653 |
| ENSMUSG00000040822 | 1700123O20Rik | 0.173753263  | 0.086141245 | 0.306572653 |
| ENSMUSG00000056608 | Chd9          | -0.171220586 | 0.086061067 | 0.306572653 |
| ENSMUSG00000082029 | H3f3c         | -0.170232079 | 0.08622583  | 0.306616386 |
| ENSMUSG00000023156 | Rpp14         | 0.159692693  | 0.086324238 | 0.306806858 |
| ENSMUSG00000024346 | Pfdn1         | 0.170992412  | 0.086328795 | 0.306806858 |
| ENSMUSG00000051499 | Zfp786        | -0.092665533 | 0.086357498 | 0.306821075 |
| ENSMUSG00000030168 | Adipor2       | -0.185764489 | 0.086497982 | 0.307232322 |
| ENSMUSG00000006019 | Dhx34         | -0.182836769 | 0.086605405 | 0.307450193 |
| ENSMUSG00000072889 | Nfxl1         | -0.185426111 | 0.086608826 | 0.307450193 |
| ENSMUSG00000020547 | Bzw2          | 0.154607825  | 0.08678394  | 0.307895836 |
| ENSMUSG00000022863 | Btg3          | 0.187499785  | 0.086773566 | 0.307895836 |
| ENSMUSG00000035596 | Mboat7        | -0.161135937 | 0.086836191 | 0.307993239 |
| ENSMUSG00000029106 | Add1          | -0.187709366 | 0.086864004 | 0.308003939 |
| ENSMUSG00000022094 | Slc39a14      | -0.082607674 | 0.086897534 | 0.308034893 |
| ENSMUSG00000031149 | Praf2         | -0.185016312 | 0.08705105  | 0.308060503 |
| ENSMUSG00000041852 | Tcf20         | 0.088228255  | 0.087053568 | 0.308060503 |
| ENSMUSG00000044700 | Tmem201       | -0.176584932 | 0.08697673  | 0.308060503 |
| ENSMUSG00000076431 | Sox4          | -0.158568244 | 0.086983075 | 0.308060503 |
| ENSMUSG00000079083 | Jrkl          | -0.180554922 | 0.08704451  | 0.308060503 |
| ENSMUSG00000106864 | Gtf3c2        | -0.182233749 | 0.087002975 | 0.308060503 |
| ENSMUSG00000000409 | Lck           | 0.099140689  | 0.087250512 | 0.308107512 |
| ENSMUSG00000004864 | Mapk13        | 0.187447417  | 0.087314905 | 0.308107512 |
| ENSMUSG00000015747 | Vps45         | -0.185626446 | 0.08716141  | 0.308107512 |
| ENSMUSG00000019579 | Mydgf         | 0.15509857   | 0.08727346  | 0.308107512 |
| ENSMUSG00000020422 | Tns3          | -0.172394719 | 0.087288811 | 0.308107512 |
| ENSMUSG00000026667 | Uhmk1         | 0.159499718  | 0.087129582 | 0.308107512 |
| ENSMUSG00000027650 | Tti1          | -0.18681694  | 0.087294223 | 0.308107512 |
| ENSMUSG00000028540 | Dph2          | -0.173360043 | 0.087239301 | 0.308107512 |
| ENSMUSG00000031983 | 2310022B05Rik | -0.170184334 | 0.087198209 | 0.308107512 |
| ENSMUSG00000050552 | Lamtor4       | 0.134653231  | 0.087157142 | 0.308107512 |
| ENSMUSG00000001518 | Itfg2         | -0.1814873   | 0.087399142 | 0.308317166 |
| ENSMUSG00000063245 | Zfp993        | -0.183049999 | 0.087425283 | 0.308321816 |
| ENSMUSG00000041654 | Slc39a11      | -0.178020348 | 0.087452009 | 0.308328526 |
| ENSMUSG00000021327 | Zkscan3       | -0.185664833 | 0.087552526 | 0.308595327 |
| ENSMUSG00000081752 | Sms-ps        | 0.181900896  | 0.087680567 | 0.308958959 |

|                    |               |              |             |             |
|--------------------|---------------|--------------|-------------|-------------|
| ENSMUSG00000040952 | Rps19         | 0.135552478  | 0.087737931 | 0.309073409 |
| ENSMUSG00000070822 | Zscan18       | -0.088839156 | 0.087787168 | 0.309159176 |
| ENSMUSG00000026867 | Gapvd1        | -0.168138192 | 0.087844139 | 0.309184487 |
| ENSMUSG00000027984 | Hadh          | 0.164896981  | 0.087843715 | 0.309184487 |
| ENSMUSG00000022534 | Mefv          | -0.185891088 | 0.087903346 | 0.309305229 |
| ENSMUSG00000070283 | Ndufaf3       | 0.163946347  | 0.087940887 | 0.309349691 |
| ENSMUSG00000030271 | Ogg1          | -0.17460037  | 0.088022921 | 0.309462977 |
| ENSMUSG00000094950 | Vmn2r66       | 0.131756878  | 0.088009784 | 0.309462977 |
| ENSMUSG00000006378 | Gcat          | 0.1869684    | 0.088051816 | 0.30947697  |
| ENSMUSG00000030960 | Eef1akmt2     | 0.168981735  | 0.088080164 | 0.309489029 |
| ENSMUSG00000029547 | Ints1         | 0.178524981  | 0.088113047 | 0.309517011 |
| ENSMUSG00000037526 | Atg14         | 0.152922258  | 0.088156783 | 0.309583093 |
| ENSMUSG00000056917 | Sipa1         | -0.188242198 | 0.088232512 | 0.309761455 |
| ENSMUSG00000053119 | Chmp3         | 0.141390284  | 0.08826879  | 0.309801255 |
| ENSMUSG00000102070 | Gm28661       | -0.012937269 | 0.088311343 | 0.309863047 |
| ENSMUSG00000019850 | Tnfaip3       | -0.134164365 | 0.08849308  | 0.309887948 |
| ENSMUSG00000031568 | Rwdd4a        | 0.14286641   | 0.088469953 | 0.309887948 |
| ENSMUSG00000032407 | U2surp        | 0.163195846  | 0.088488357 | 0.309887948 |
| ENSMUSG00000033970 | Rfc3          | 0.146385802  | 0.088479873 | 0.309887948 |
| ENSMUSG00000042155 | Klhl23        | 0.182088681  | 0.088379521 | 0.309887948 |
| ENSMUSG00000062519 | Zfp398        | -0.178459666 | 0.088378621 | 0.309887948 |
| ENSMUSG00000073643 | Wdfy1         | 0.183595166  | 0.088437294 | 0.309887948 |
| ENSMUSG00000022817 | Itgb5         | -0.171700402 | 0.088602255 | 0.310037031 |
| ENSMUSG00000027357 | Crls1         | 0.148304378  | 0.088579589 | 0.310037031 |
| ENSMUSG00000031927 | 1700012B09Rik | -0.15166189  | 0.088635496 | 0.310037031 |
| ENSMUSG00000046908 | Ltb4r1        | -0.14511855  | 0.088633909 | 0.310037031 |
| ENSMUSG00000002055 | Spag5         | -0.17631674  | 0.088685913 | 0.310057607 |
| ENSMUSG00000061207 | Stk19         | 0.169560547  | 0.088691303 | 0.310057607 |
| ENSMUSG00000022451 | Twf1          | 0.174175879  | 0.088786659 | 0.310216342 |
| ENSMUSG00000044155 | Lsm8          | 0.148753868  | 0.088778166 | 0.310216342 |
| ENSMUSG00000024875 | Yif1a         | 0.142639539  | 0.088846895 | 0.31025226  |
| ENSMUSG00000032558 | Nphp3         | -0.06706256  | 0.088829705 | 0.31025226  |
| ENSMUSG00000020513 | Tubd1         | 0.165990434  | 0.088876585 | 0.310268707 |
| ENSMUSG00000025962 | Fastkd2       | 0.178492633  | 0.088957918 | 0.310378173 |
| ENSMUSG00000041426 | Hibch         | 0.183447506  | 0.088940713 | 0.310378173 |
| ENSMUSG00000039686 | Zer1          | -0.154486329 | 0.089015152 | 0.310490648 |
| ENSMUSG00000026000 | Lancl1        | -0.158680622 | 0.089078164 | 0.310623209 |
| ENSMUSG00000019797 | 1700021F05Rik | 0.159779566  | 0.089119116 | 0.310678795 |
| ENSMUSG00000025373 | Rnf41         | -0.154906688 | 0.089189313 | 0.310836268 |
| ENSMUSG00000052293 | Taf9          | 0.173033338  | 0.089239565 | 0.310836972 |
| ENSMUSG00000052305 | Hbb-bs        | -0.040649941 | 0.08923568  | 0.310836972 |
| ENSMUSG00000049999 | Ppp1r3d       | -0.168107599 | 0.089288441 | 0.310920022 |
| ENSMUSG00000002844 | Adprh         | -0.141951728 | 0.089470347 | 0.31119395  |

|                    |               |              |             |             |
|--------------------|---------------|--------------|-------------|-------------|
| ENSMUSG00000028556 | Dock7         | -0.174361946 | 0.089517429 | 0.31119395  |
| ENSMUSG00000031672 | Got2          | 0.167500954  | 0.089493269 | 0.31119395  |
| ENSMUSG00000037017 | Zscan21       | -0.178946046 | 0.089511566 | 0.31119395  |
| ENSMUSG00000060002 | Chpt1         | 0.174556891  | 0.089428544 | 0.31119395  |
| ENSMUSG00000073490 | Ifi207        | -0.073822226 | 0.089504474 | 0.31119395  |
| ENSMUSG00000032754 | Slc8b1        | -0.156251076 | 0.089586479 | 0.311259765 |
| ENSMUSG00000115981 | AC119928.2    | 0.161994958  | 0.089583126 | 0.311259765 |
| ENSMUSG00000003623 | Crot          | -0.164302923 | 0.089734805 | 0.311552605 |
| ENSMUSG00000022914 | Brwd1         | -0.171975237 | 0.089746012 | 0.311552605 |
| ENSMUSG00000039167 | Adgrl4        | -0.183673657 | 0.08971935  | 0.311552605 |
| ENSMUSG00000020402 | Vdac1         | 0.1709457    | 0.089863278 | 0.311872528 |
| ENSMUSG00000026034 | Clk1          | -0.184242964 | 0.089923147 | 0.311993129 |
| ENSMUSG00000003518 | Dusp3         | 0.110154638  | 0.089960055 | 0.312034026 |
| ENSMUSG00000038412 | Higd1a        | 0.166973025  | 0.090004485 | 0.312100979 |
| ENSMUSG00000023800 | Tiam2         | -0.166338398 | 0.090169135 | 0.312497441 |
| ENSMUSG00000039100 | March6        | 0.152851417  | 0.090163545 | 0.312497441 |
| ENSMUSG00000029053 | Prkc2         | -0.14095879  | 0.09020905  | 0.312548565 |
| ENSMUSG00000034330 | Plcg2         | -0.179505433 | 0.090314506 | 0.312826683 |
| ENSMUSG00000030265 | Kras          | 0.175050869  | 0.090392453 | 0.313009383 |
| ENSMUSG00000032575 | Manf          | 0.180139099  | 0.090454369 | 0.313136488 |
| ENSMUSG00000058569 | Tmed9         | -0.156122517 | 0.090517193 | 0.313266664 |
| ENSMUSG00000095937 | Gm12671       | 0.15140948   | 0.090602537 | 0.313474682 |
| ENSMUSG00000028743 | Akr7a5        | 0.171198595  | 0.090732799 | 0.313651291 |
| ENSMUSG00000029911 | Ssbp1         | 0.139133477  | 0.090728634 | 0.313651291 |
| ENSMUSG00000043831 | Lysmd4        | -0.183804505 | 0.090710597 | 0.313651291 |
| ENSMUSG00000057738 | Sptan1        | 0.157116623  | 0.090754588 | 0.313651291 |
| ENSMUSG00000098549 | Gm5269        | 0.184330558  | 0.090944685 | 0.314220845 |
| ENSMUSG00000019982 | Myb           | -0.179739681 | 0.091103023 | 0.314613368 |
| ENSMUSG00000041688 | Amot          | 0.112725687  | 0.091160442 | 0.314613368 |
| ENSMUSG00000070934 | Rraga         | 0.133476528  | 0.091184939 | 0.314613368 |
| ENSMUSG00000072676 | Tmem254a      | -0.064379018 | 0.091176138 | 0.314613368 |
| ENSMUSG00000094483 | Purb          | -0.171049462 | 0.091176325 | 0.314613368 |
| ENSMUSG00000020234 | 4930404N11Rik | -0.052004558 | 0.09128019  | 0.314854552 |
| ENSMUSG00000030220 | Arhgdib       | 0.173252972  | 0.091326031 | 0.314925217 |
| ENSMUSG00000026520 | Pycr2         | 0.13134614   | 0.091430272 | 0.315197171 |
| ENSMUSG00000010755 | Cars          | 0.162750255  | 0.091696107 | 0.315463142 |
| ENSMUSG00000030314 | Atg7          | -0.168076303 | 0.091672709 | 0.315463142 |
| ENSMUSG00000052296 | Ppp6r1        | -0.174215755 | 0.091710604 | 0.315463142 |
| ENSMUSG00000069184 | Zfp72         | -0.169270337 | 0.091631867 | 0.315463142 |
| ENSMUSG00000079018 | Ly6c1         | 0.170304151  | 0.091590131 | 0.315463142 |
| ENSMUSG00000079110 | Capn3         | -0.053345519 | 0.091704905 | 0.315463142 |
| ENSMUSG00000094530 | Gm21399       | 0.102460825  | 0.091664169 | 0.315463142 |
| ENSMUSG00000114737 | Gm8483        | 0.125000318  | 0.091639036 | 0.315463142 |

|                    |            |              |             |             |
|--------------------|------------|--------------|-------------|-------------|
| ENSMUSG00000061482 | Hist1h4d   | 0.177161094  | 0.091778833 | 0.315610434 |
| ENSMUSG00000024334 | H2-Oa      | -0.182273465 | 0.091854738 | 0.315784029 |
| ENSMUSG00000058057 | Mettl7a3   | -0.182390627 | 0.092029061 | 0.316295783 |
| ENSMUSG00000024795 | Kif20b     | -0.16431445  | 0.092097806 | 0.316444493 |
| ENSMUSG00000032258 | Lca5       | -0.061901766 | 0.09216968  | 0.316603871 |
| ENSMUSG00000015095 | Fbxw5      | -0.158643478 | 0.092284774 | 0.316736439 |
| ENSMUSG00000033885 | Pxk        | -0.163537914 | 0.092270827 | 0.316736439 |
| ENSMUSG00000061848 | Gm5805     | 0.108621924  | 0.092267552 | 0.316736439 |
| ENSMUSG00000051671 | Coa6       | 0.148721458  | 0.092338306 | 0.316832624 |
| ENSMUSG00000028959 | Fastk      | -0.146162657 | 0.092429766 | 0.317058857 |
| ENSMUSG00000021124 | Vti1b      | 0.15199731   | 0.092533062 | 0.317325554 |
| ENSMUSG00000034203 | Chchd4     | 0.174679431  | 0.092623383 | 0.317547624 |
| ENSMUSG00000082896 | Gm5844     | 0.061791492  | 0.09265249  | 0.317559763 |
| ENSMUSG00000050931 | Sgms2      | 0.175694769  | 0.092770187 | 0.317875445 |
| ENSMUSG00000000861 | Bcl11a     | 0.156212318  | 0.092917193 | 0.318291357 |
| ENSMUSG00000038335 | Tsr1       | 0.180469753  | 0.092983699 | 0.318431355 |
| ENSMUSG00000081572 | Gm14138    | 0.084603992  | 0.093035736 | 0.318521742 |
| ENSMUSG00000056153 | Socs6      | -0.181717909 | 0.09312109  | 0.318726111 |
| ENSMUSG00000005103 | Wdr1       | -0.136306586 | 0.093248218 | 0.318750075 |
| ENSMUSG00000020388 | Pdlim4     | -0.113105932 | 0.093197959 | 0.318750075 |
| ENSMUSG00000026969 | Fam166a    | 0.172845793  | 0.093224896 | 0.318750075 |
| ENSMUSG00000037652 | Phc3       | -0.180810422 | 0.093256402 | 0.318750075 |
| ENSMUSG00000069919 | Hba-a1     | -0.039548295 | 0.093207559 | 0.318750075 |
| ENSMUSG00000039328 | Rnf122     | -0.119958486 | 0.093305364 | 0.318829692 |
| ENSMUSG00000020273 | Papolg     | -0.176511484 | 0.093393263 | 0.319042276 |
| ENSMUSG00000026687 | Aldh9a1    | -0.137580969 | 0.093452161 | 0.319155703 |
| ENSMUSG00000020451 | Limk2      | -0.174406479 | 0.093595948 | 0.319558899 |
| ENSMUSG00000069769 | Msi2       | 0.0974296    | 0.093748703 | 0.319992481 |
| ENSMUSG00000069729 | Arid1b     | -0.16173081  | 0.094042108 | 0.320905777 |
| ENSMUSG00000057506 | Bloc1s2    | 0.156605431  | 0.094096011 | 0.321001524 |
| ENSMUSG00000063001 | Gm9701     | 0.085916995  | 0.094135375 | 0.321047637 |
| ENSMUSG00000028163 | Nfkb1      | 0.176773729  | 0.094203295 | 0.321102943 |
| ENSMUSG00000038241 | Cep250     | 0.160522888  | 0.094189446 | 0.321102943 |
| ENSMUSG00000005465 | Ii27ra     | -0.104133862 | 0.094448786 | 0.321287033 |
| ENSMUSG00000025870 | Arl10      | -0.178619092 | 0.094464234 | 0.321287033 |
| ENSMUSG00000032312 | Csk        | -0.16557766  | 0.094299521 | 0.321287033 |
| ENSMUSG00000040701 | Ap1g2      | -0.146181791 | 0.094445202 | 0.321287033 |
| ENSMUSG00000041375 | Ccdc9      | -0.173872629 | 0.094432185 | 0.321287033 |
| ENSMUSG00000049482 | Ctu2       | 0.179008743  | 0.094436274 | 0.321287033 |
| ENSMUSG00000090639 | Gm20425    | -0.14879085  | 0.094417569 | 0.321287033 |
| ENSMUSG00000117202 | AC169506.3 | 0.133447363  | 0.094421845 | 0.321287033 |
| ENSMUSG00000020483 | Dynll2     | 0.17422039   | 0.09449857  | 0.321315833 |
| ENSMUSG00000024370 | Cdc23      | -0.179909064 | 0.094551818 | 0.321335678 |

|                    |               |              |             |             |
|--------------------|---------------|--------------|-------------|-------------|
| ENSMUSG00000030792 | Dkk1          | 0.123776274  | 0.094556147 | 0.321335678 |
| ENSMUSG00000021243 | Fcf1          | 0.167523255  | 0.094721288 | 0.321808839 |
| ENSMUSG00000021699 | Pde4d         | 0.165531559  | 0.094852685 | 0.32216713  |
| ENSMUSG00000003208 | Yju2          | -0.180876847 | 0.094943276 | 0.3222105   |
| ENSMUSG00000039474 | Wfs1          | -0.129377547 | 0.094935512 | 0.3222105   |
| ENSMUSG00000115312 | Gm8518        | 0.050958284  | 0.09491898  | 0.3222105   |
| ENSMUSG00000025133 | Ints4         | -0.160249045 | 0.095018959 | 0.322379264 |
| ENSMUSG00000098090 | 2700099C18Rik | -0.150662663 | 0.095066278 | 0.322451731 |
| ENSMUSG00000092072 | Gm4540        | 0.181202775  | 0.095134433 | 0.322594811 |
| ENSMUSG00000020156 | Mum1          | -0.17095508  | 0.095215355 | 0.322607354 |
| ENSMUSG00000028443 | Nudt2         | 0.163176778  | 0.095183842 | 0.322607354 |
| ENSMUSG00000032652 | Crebl2        | -0.12520149  | 0.095242023 | 0.322607354 |
| ENSMUSG00000035367 | Rmi1          | -0.164019056 | 0.09521981  | 0.322607354 |
| ENSMUSG00000029201 | Ugdh          | -0.182363189 | 0.095382668 | 0.322995671 |
| ENSMUSG00000017692 | Rhbdl3        | 0.171831498  | 0.095517593 | 0.323364411 |
| ENSMUSG00000005986 | Ankrd13d      | -0.132245351 | 0.09571183  | 0.323581014 |
| ENSMUSG00000020432 | Tcn2          | -0.147356722 | 0.095700236 | 0.323581014 |
| ENSMUSG00000025591 | Tma16         | 0.178194219  | 0.095689761 | 0.323581014 |
| ENSMUSG00000045273 | Cenph         | 0.141694927  | 0.095677068 | 0.323581014 |
| ENSMUSG00000083474 | Gm15267       | 0.045046919  | 0.095610613 | 0.323581014 |
| ENSMUSG00000045100 | Slc25a26      | 0.12508673   | 0.095777441 | 0.323626658 |
| ENSMUSG00000081855 | Rpl17-ps5     | 0.179440289  | 0.095752933 | 0.323626658 |
| ENSMUSG00000078877 | Gm14295       | -0.131180558 | 0.095827262 | 0.323641656 |
| ENSMUSG00000079334 | Naa80         | -0.171024869 | 0.095833992 | 0.323641656 |
| ENSMUSG00000024073 | Birc6         | 0.176546772  | 0.095919002 | 0.323762308 |
| ENSMUSG00000111897 | Gm19810       | 0.179046353  | 0.095921849 | 0.323762308 |
| ENSMUSG00000038806 | Sde2          | 0.164685373  | 0.096072424 | 0.324182446 |
| ENSMUSG00000039253 | Fn3krp        | 0.089773482  | 0.096142879 | 0.324332076 |
| ENSMUSG00000052673 | Gm9887        | -0.100264336 | 0.096283396 | 0.324717911 |
| ENSMUSG00000024991 | Eif3a         | 0.17251201   | 0.096437002 | 0.324883102 |
| ENSMUSG00000028621 | Cyb5rl        | -0.173449652 | 0.096436568 | 0.324883102 |
| ENSMUSG00000033032 | Afap1l1       | -0.169497059 | 0.096423426 | 0.324883102 |
| ENSMUSG00000052392 | Acot4         | -0.05964027  | 0.096432009 | 0.324883102 |
| ENSMUSG00000064264 | Zfp428        | 0.179913291  | 0.096466807 | 0.324895394 |
| ENSMUSG00000049091 | Sephs2        | 0.179063809  | 0.09651088  | 0.324955716 |
| ENSMUSG00000024193 | Phf1          | -0.080324129 | 0.096581935 | 0.325106833 |
| ENSMUSG00000026344 | Lypd1         | -0.099076579 | 0.096888504 | 0.325535848 |
| ENSMUSG00000029094 | Afap1         | 0.176284237  | 0.096742859 | 0.325535848 |
| ENSMUSG00000029512 | Ulk1          | -0.168030352 | 0.096840171 | 0.325535848 |
| ENSMUSG00000035199 | Arl6ip5       | 0.16350991   | 0.096892845 | 0.325535848 |
| ENSMUSG00000037940 | Inpp4b        | -0.05723349  | 0.096841575 | 0.325535848 |
| ENSMUSG00000038024 | Dennd4c       | -0.166374017 | 0.096865533 | 0.325535848 |
| ENSMUSG00000110234 | Gm45799       | 0.154961999  | 0.096885017 | 0.325535848 |

|                     |               |              |             |             |
|---------------------|---------------|--------------|-------------|-------------|
| ENSMUSG00000001175  | Calm1         | 0.159313718  | 0.096964824 | 0.325549604 |
| ENSMUSG00000002307  | Daxx          | -0.171876631 | 0.096975568 | 0.325549604 |
| ENSMUSG000000027942 | 4933434E20Rik | -0.166548699 | 0.096960292 | 0.325549604 |
| ENSMUSG000000051133 | Gm6293        | -0.127235165 | 0.097103129 | 0.325889752 |
| ENSMUSG000000020471 | Pold2         | -0.140835644 | 0.097192218 | 0.326017081 |
| ENSMUSG000000030352 | Tspan9        | -0.062830885 | 0.097193563 | 0.326017081 |
| ENSMUSG000000000823 | Zfp512b       | -0.166480157 | 0.097461138 | 0.326173724 |
| ENSMUSG000000024317 | Rnf138        | 0.142023507  | 0.097465341 | 0.326173724 |
| ENSMUSG000000025817 | Nudt5         | 0.160044213  | 0.097529121 | 0.326173724 |
| ENSMUSG000000028871 | Rspo1         | -0.105515799 | 0.097377901 | 0.326173724 |
| ENSMUSG000000030615 | Tmem126a      | 0.15288992   | 0.097366558 | 0.326173724 |
| ENSMUSG000000031060 | Rbm10         | -0.176811569 | 0.097392711 | 0.326173724 |
| ENSMUSG000000035168 | Tanc1         | 0.063871385  | 0.097527159 | 0.326173724 |
| ENSMUSG000000037994 | Slc9b2        | -0.062889861 | 0.097418672 | 0.326173724 |
| ENSMUSG000000043415 | Otud1         | -0.149984925 | 0.097435918 | 0.326173724 |
| ENSMUSG000000068040 | Tm9sf4        | -0.138406809 | 0.097377923 | 0.326173724 |
| ENSMUSG00000109675  | Nxpe1-ps      | -0.169185412 | 0.097504354 | 0.326173724 |
| ENSMUSG000000034343 | Ube2f         | 0.148435802  | 0.097599436 | 0.326321023 |
| ENSMUSG000000040033 | Stat2         | -0.174878804 | 0.09773819  | 0.326694047 |
| ENSMUSG00000109336  | Samd4b        | -0.046319644 | 0.097763608 | 0.326694047 |
| ENSMUSG000000046806 | Cyren         | 0.177374646  | 0.097856297 | 0.326915834 |
| ENSMUSG000000018507 | Trpv2         | -0.178770691 | 0.098089429 | 0.32710509  |
| ENSMUSG000000024617 | Camk2a        | -0.135732676 | 0.098032103 | 0.32710509  |
| ENSMUSG000000027522 | Stx16         | -0.149222202 | 0.097947688 | 0.32710509  |
| ENSMUSG000000030386 | Zfp606        | -0.178693035 | 0.098123626 | 0.32710509  |
| ENSMUSG000000035203 | Epn1          | -0.097153861 | 0.098104462 | 0.32710509  |
| ENSMUSG000000041779 | Tram2         | -0.124836721 | 0.098102372 | 0.32710509  |
| ENSMUSG000000074829 | 2010315B03Rik | -0.178225582 | 0.098046015 | 0.32710509  |
| ENSMUSG00000113611  | Gm47750       | 0.169937596  | 0.098106016 | 0.32710509  |
| ENSMUSG000000055720 | Ubl7          | -0.173192903 | 0.098155996 | 0.327125203 |
| ENSMUSG000000031697 | Orc6          | 0.134085418  | 0.098299077 | 0.327514172 |
| ENSMUSG000000038268 | Ovca2         | 0.17244347   | 0.098391891 | 0.327647637 |
| ENSMUSG000000057409 | Zfp53         | -0.171939808 | 0.098374483 | 0.327647637 |
| ENSMUSG000000072294 | Klf12         | 0.168369523  | 0.098433296 | 0.327697658 |
| ENSMUSG000000026209 | Dnpep         | -0.144964313 | 0.098494481 | 0.32781349  |
| ENSMUSG000000030659 | Nucb2         | 0.167866854  | 0.098525569 | 0.327829115 |
| ENSMUSG000000024055 | Cyp4f13       | -0.15486768  | 0.098598783 | 0.327897052 |
| ENSMUSG000000025008 | Tctn3         | -0.177715925 | 0.098590639 | 0.327897052 |
| ENSMUSG000000024220 | Zfp523        | -0.170953464 | 0.098667448 | 0.327949793 |
| ENSMUSG000000063275 | Hacd1         | 0.149971665  | 0.098656651 | 0.327949793 |
| ENSMUSG000000067010 | Vmn2r10       | 0.168849648  | 0.098747862 | 0.328129266 |
| ENSMUSG000000039110 | Mycbpap       | -0.048953021 | 0.098777848 | 0.328141121 |
| ENSMUSG000000014355 | Anapc1        | 0.162827263  | 0.098823979 | 0.32820659  |

|                    |           |              |             |             |
|--------------------|-----------|--------------|-------------|-------------|
| ENSMUSG00000024011 | Pi16      | -0.100342663 | 0.098872585 | 0.32828024  |
| ENSMUSG00000097979 | Gm4691    | 0.088078008  | 0.098959674 | 0.328481589 |
| ENSMUSG00000034154 | Ino80     | 0.160049828  | 0.09915539  | 0.329043307 |
| ENSMUSG00000038244 | Mical2    | -0.100282    | 0.099258666 | 0.329298049 |
| ENSMUSG00000022956 | Atp5o     | 0.155831577  | 0.099356394 | 0.329474811 |
| ENSMUSG00000025034 | Trim8     | -0.154648565 | 0.099376408 | 0.329474811 |
| ENSMUSG00000038020 | Rapgef1   | -0.085539743 | 0.099391524 | 0.329474811 |
| ENSMUSG00000021532 | Fastkd3   | 0.155044364  | 0.099534426 | 0.329782218 |
| ENSMUSG00000040242 | Fgfr1op2  | 0.136254188  | 0.099537359 | 0.329782218 |
| ENSMUSG00000026180 | Cxcr2     | -0.170049189 | 0.099760257 | 0.330380769 |
| ENSMUSG00000038299 | Wdr36     | 0.168063306  | 0.099771215 | 0.330380769 |
| ENSMUSG00000004937 | Sgta      | -0.13446836  | 0.099998669 | 0.330574529 |
| ENSMUSG00000018858 | Mrpl58    | 0.150563277  | 0.100053674 | 0.330574529 |
| ENSMUSG00000020585 | Laptm4a   | -0.16547605  | 0.099986596 | 0.330574529 |
| ENSMUSG00000020921 | Tmem101   | -0.176154355 | 0.099872163 | 0.330574529 |
| ENSMUSG00000025877 | Hk3       | -0.174343329 | 0.100069256 | 0.330574529 |
| ENSMUSG00000027845 | Dclre1b   | -0.165233663 | 0.099962012 | 0.330574529 |
| ENSMUSG00000031093 | Dock11    | 0.154785176  | 0.10006371  | 0.330574529 |
| ENSMUSG00000047714 | Ppp1r2    | 0.166534803  | 0.100037567 | 0.330574529 |
| ENSMUSG00000093575 | Gm20695   | -0.05000269  | 0.099988207 | 0.330574529 |
| ENSMUSG00000032020 | Ubash3b   | -0.175329479 | 0.100248261 | 0.331077811 |
| ENSMUSG00000003464 | Pex19     | -0.172873653 | 0.100284076 | 0.331108058 |
| ENSMUSG00000002147 | Stat6     | -0.167333533 | 0.100311811 | 0.331111614 |
| ENSMUSG00000015335 | Zdhhc12   | -0.158380637 | 0.100343477 | 0.331119238 |
| ENSMUSG00000111228 | Gm48789   | -0.152573681 | 0.100367437 | 0.331119238 |
| ENSMUSG00000021222 | Dcaf4     | -0.154596146 | 0.100472309 | 0.331377205 |
| ENSMUSG00000112148 | Lilrb4a   | -0.162934638 | 0.1004995   | 0.331378892 |
| ENSMUSG00000039960 | Rhou      | -0.138888985 | 0.100651539 | 0.331792135 |
| ENSMUSG00000033713 | Foxn3     | -0.174826207 | 0.100701672 | 0.33186932  |
| ENSMUSG00000006732 | Mettl1    | 0.133017172  | 0.100728961 | 0.331871199 |
| ENSMUSG00000019951 | Uhrf1bp1l | 0.173107585  | 0.100903188 | 0.332268955 |
| ENSMUSG00000028434 | Epb41l4b  | -0.071491094 | 0.100900554 | 0.332268955 |
| ENSMUSG00000022022 | Mtrf1     | 0.163046352  | 0.101027162 | 0.332589022 |
| ENSMUSG00000020376 | Rnf130    | 0.126126965  | 0.101137679 | 0.332776453 |
| ENSMUSG00000026469 | Xpr1      | -0.174783872 | 0.101125722 | 0.332776453 |
| ENSMUSG00000032554 | Trf       | -0.170575952 | 0.101241832 | 0.33303093  |
| ENSMUSG00000024958 | Gpr137    | -0.172828014 | 0.101358112 | 0.333225398 |
| ENSMUSG00000028950 | Tas1r1    | -0.145314241 | 0.101381433 | 0.333225398 |
| ENSMUSG00000038957 | Edc3      | -0.178689844 | 0.101327833 | 0.333225398 |
| ENSMUSG00000044229 | Nxpe4     | -0.156353916 | 0.101553144 | 0.333701483 |
| ENSMUSG00000110860 | Ptpmt1    | 0.160853834  | 0.101647067 | 0.333921771 |
| ENSMUSG00000083678 | Gm12989   | 0.134483967  | 0.101714504 | 0.334054959 |
| ENSMUSG00000016409 | Nkap      | 0.158174245  | 0.101757542 | 0.334107966 |

|                     |           |              |             |             |
|---------------------|-----------|--------------|-------------|-------------|
| ENSMUSG00000001942  | Siae      | -0.173158477 | 0.101834262 | 0.334225729 |
| ENSMUSG000000036940 | Kdm1a     | -0.15214108  | 0.101919668 | 0.334225729 |
| ENSMUSG000000044098 | Rsb1      | 0.175095096  | 0.10192795  | 0.334225729 |
| ENSMUSG000000053929 | Cyhr1     | -0.175058601 | 0.101852373 | 0.334225729 |
| ENSMUSG000000074785 | Plxnc1    | -0.161304084 | 0.101874463 | 0.334225729 |
| ENSMUSG000000039128 | Cdc123    | 0.154143789  | 0.102003376 | 0.334384782 |
| ENSMUSG000000022385 | Gtse1     | -0.16137894  | 0.102115776 | 0.334488409 |
| ENSMUSG000000030451 | Herc2     | 0.167181915  | 0.10210367  | 0.334488409 |
| ENSMUSG000000085939 | Cd63-ps   | 0.159008056  | 0.102101402 | 0.334488409 |
| ENSMUSG000000091383 | Hist1h2al | 0.135291344  | 0.10228243  | 0.334866343 |
| ENSMUSG000000114886 | Gm48432   | 0.104138216  | 0.102285074 | 0.334866343 |
| ENSMUSG000000024927 | Rela      | -0.165932156 | 0.102440294 | 0.334921419 |
| ENSMUSG000000029629 | Phf14     | 0.173975176  | 0.102424191 | 0.334921419 |
| ENSMUSG000000033767 | Tmem131l  | 0.140861128  | 0.102338283 | 0.334921419 |
| ENSMUSG000000036622 | Atp13a2   | -0.122362073 | 0.102377581 | 0.334921419 |
| ENSMUSG000000053293 | Pom121    | 0.155724142  | 0.102463682 | 0.334921419 |
| ENSMUSG000000082729 | Gm14845   | 0.175600578  | 0.102402046 | 0.334921419 |
| ENSMUSG000000022364 | Tbc1d31   | -0.171611899 | 0.102520463 | 0.334953615 |
| ENSMUSG000000024451 | Arap3     | -0.157717476 | 0.102687656 | 0.334953615 |
| ENSMUSG000000029249 | Rest      | -0.157032862 | 0.102649526 | 0.334953615 |
| ENSMUSG000000031921 | Terf2     | -0.169051517 | 0.10261099  | 0.334953615 |
| ENSMUSG000000034709 | Ppp1r21   | -0.163740524 | 0.102532497 | 0.334953615 |
| ENSMUSG000000036860 | Mrpl55    | 0.158850682  | 0.102689265 | 0.334953615 |
| ENSMUSG000000042589 | Cux2      | -0.094505786 | 0.102584283 | 0.334953615 |
| ENSMUSG000000074748 | Atxn7l3b  | -0.143261816 | 0.102608215 | 0.334953615 |
| ENSMUSG000000028409 | Smu1      | 0.160370298  | 0.102785692 | 0.335022755 |
| ENSMUSG000000036323 | Srp72     | 0.148677209  | 0.102791379 | 0.335022755 |
| ENSMUSG000000113889 | Gm48501   | -0.062621352 | 0.102767461 | 0.335022755 |
| ENSMUSG000000027274 | Mkks      | 0.170380352  | 0.102836034 | 0.335078006 |
| ENSMUSG000000030725 | Lipt2     | 0.174568185  | 0.102862285 | 0.335078006 |
| ENSMUSG000000025381 | Cnpy2     | 0.122373537  | 0.102963201 | 0.335318803 |
| ENSMUSG000000006127 | Inpp5k    | -0.166399969 | 0.103093534 | 0.335567293 |
| ENSMUSG000000059060 | Rad51b    | -0.174514732 | 0.1030761   | 0.335567293 |
| ENSMUSG000000034111 | Tmed8     | 0.096529266  | 0.10317511  | 0.335639361 |
| ENSMUSG000000067608 | Pcna-ps2  | 0.105506772  | 0.103147241 | 0.335639361 |
| ENSMUSG000000070639 | Lrrc8b    | 0.174509501  | 0.103196741 | 0.335639361 |
| ENSMUSG000000045932 | Ifit2     | 0.171276449  | 0.103313844 | 0.335932267 |
| ENSMUSG000000016526 | Dyrk3     | -0.173225486 | 0.103490664 | 0.336419141 |
| ENSMUSG000000021877 | Arf4      | -0.134608115 | 0.103610335 | 0.336543925 |
| ENSMUSG000000026035 | Ppil3     | 0.146034792  | 0.103591257 | 0.336543925 |
| ENSMUSG000000039298 | Cdk5rap2  | 0.174792476  | 0.103579667 | 0.336543925 |
| ENSMUSG000000074867 | Zfp808    | -0.15962393  | 0.103646612 | 0.336573742 |
| ENSMUSG000000021870 | Simap     | 0.173493228  | 0.103689294 | 0.33659591  |

|                    |               |              |             |             |
|--------------------|---------------|--------------|-------------|-------------|
| ENSMUSG00000037999 | Arap2         | 0.164729054  | 0.103707636 | 0.33659591  |
| ENSMUSG00000061702 | Tmem91        | -0.08710699  | 0.10380676  | 0.336829615 |
| ENSMUSG00000043648 | Pld6          | -0.11087856  | 0.103890856 | 0.336926453 |
| ENSMUSG00000063179 | Pstk          | 0.174048397  | 0.103878951 | 0.336926453 |
| ENSMUSG00000002804 | Nudt14        | 0.160956877  | 0.103974969 | 0.337031617 |
| ENSMUSG00000051403 | Ppp1r37       | -0.106772708 | 0.103999689 | 0.337031617 |
| ENSMUSG00000057829 | Gm5278        | 0.119605442  | 0.104004685 | 0.337031617 |
| ENSMUSG00000000378 | Ccm2          | -0.166720863 | 0.104153114 | 0.337256356 |
| ENSMUSG00000009112 | Bcl2l13       | 0.168083267  | 0.104171597 | 0.337256356 |
| ENSMUSG00000039630 | Hnrnpu        | 0.15775929   | 0.104182645 | 0.337256356 |
| ENSMUSG00000041645 | Ddx24         | 0.145989676  | 0.104101312 | 0.337256356 |
| ENSMUSG00000081907 | Gm13731       | 0.120869978  | 0.104255054 | 0.337402821 |
| ENSMUSG00000026723 | Trdmt1        | 0.161441214  | 0.104354044 | 0.337635212 |
| ENSMUSG00000028868 | Wasf2         | 0.173468176  | 0.104590655 | 0.338312638 |
| ENSMUSG00000022139 | Mbnl2         | -0.134435624 | 0.104726119 | 0.338398316 |
| ENSMUSG00000022309 | Angpt1        | -0.120268455 | 0.104672297 | 0.338398316 |
| ENSMUSG00000027447 | Cst3          | -0.153904174 | 0.104689641 | 0.338398316 |
| ENSMUSG00000102535 | Ighv1-41      | 0.106115603  | 0.104701861 | 0.338398316 |
| ENSMUSG00000047022 | Mipol1        | 0.151660042  | 0.104816337 | 0.338513708 |
| ENSMUSG00000063019 | Manbal        | 0.142563898  | 0.104793408 | 0.338513708 |
| ENSMUSG00000029326 | Enoph1        | 0.145648062  | 0.104886029 | 0.338561838 |
| ENSMUSG00000031447 | Lamp1         | -0.134875163 | 0.104931177 | 0.338561838 |
| ENSMUSG00000039308 | Ndst2         | -0.161084279 | 0.104975394 | 0.338561838 |
| ENSMUSG00000061882 | Ccdc62        | 0.171765608  | 0.104981974 | 0.338561838 |
| ENSMUSG00000083705 | Gm8624        | 0.172127618  | 0.104994783 | 0.338561838 |
| ENSMUSG00000096361 | Gm5814        | 0.156122838  | 0.104983314 | 0.338561838 |
| ENSMUSG00000035310 | Lin54         | -0.167689532 | 0.105025782 | 0.338566241 |
| ENSMUSG00000106326 | Gm42977       | 0.161746941  | 0.105050664 | 0.338566241 |
| ENSMUSG00000022788 | Fgd4          | -0.172413876 | 0.105247486 | 0.338865309 |
| ENSMUSG00000028070 | Naxe          | 0.126568672  | 0.105252585 | 0.338865309 |
| ENSMUSG00000061032 | Rrp1          | 0.119570155  | 0.105226595 | 0.338865309 |
| ENSMUSG00000062510 | Nsl1          | -0.150246127 | 0.105205787 | 0.338865309 |
| ENSMUSG00000030059 | Tmf1          | 0.16084897   | 0.105349207 | 0.339088495 |
| ENSMUSG00000031242 | 2610002M06Rik | 0.148560199  | 0.105377055 | 0.339090258 |
| ENSMUSG00000038342 | Mlxip         | -0.155228578 | 0.105457426 | 0.339154386 |
| ENSMUSG00000044583 | Tlr7          | 0.054669638  | 0.105483797 | 0.339154386 |
| ENSMUSG00000047515 | BC049715      | 0.111160627  | 0.105474806 | 0.339154386 |
| ENSMUSG00000066637 | Ttc32         | 0.148407688  | 0.105506203 | 0.339154386 |
| ENSMUSG00000018341 | Ii12rb2       | -0.103633926 | 0.105627007 | 0.33928789  |
| ENSMUSG00000030138 | Bms1          | 0.172893255  | 0.105656997 | 0.33928789  |
| ENSMUSG00000040105 | Plpp6         | -0.168062637 | 0.105656689 | 0.33928789  |
| ENSMUSG00000057342 | Sphk2         | -0.146319547 | 0.105641152 | 0.33928789  |
| ENSMUSG00000028943 | Espn          | -0.128529047 | 0.105696697 | 0.33932765  |

|                    |            |              |             |             |
|--------------------|------------|--------------|-------------|-------------|
| ENSMUSG00000003184 | Irf3       | -0.127118378 | 0.105828885 | 0.339418346 |
| ENSMUSG00000021287 | Xrcc3      | -0.146749554 | 0.105790917 | 0.339418346 |
| ENSMUSG00000054716 | Zfp771     | 0.16822156   | 0.105834253 | 0.339418346 |
| ENSMUSG00000101678 | Gm29609    | 0.039815795  | 0.105815526 | 0.339418346 |
| ENSMUSG00000072244 | Trim6      | -0.171508519 | 0.105878787 | 0.33947352  |
| ENSMUSG00000020400 | Tnip1      | -0.170502882 | 0.105999917 | 0.339774186 |
| ENSMUSG00000073838 | Tufm       | 0.159964731  | 0.106058639 | 0.339874706 |
| ENSMUSG00000041481 | Serpina3g  | 0.175062942  | 0.106152702 | 0.340088395 |
| ENSMUSG00000027248 | Pdia3      | 0.168488845  | 0.106292815 | 0.340361704 |
| ENSMUSG00000071266 | Zfp946     | -0.169109609 | 0.10626863  | 0.340361704 |
| ENSMUSG00000066258 | Trim12a    | 0.147096271  | 0.106369547 | 0.340519625 |
| ENSMUSG00000021190 | Lgmn       | -0.110000638 | 0.106469617 | 0.340752154 |
| ENSMUSG00000039206 | Daglb      | -0.15262606  | 0.106562708 | 0.340881158 |
| ENSMUSG00000117439 | AC122306.1 | 0.166966058  | 0.106564813 | 0.340881158 |
| ENSMUSG00000020163 | Uqcr11     | 0.155266005  | 0.106712504 | 0.34126571  |
| ENSMUSG00000026915 | Strbp      | 0.149684988  | 0.106773832 | 0.341286096 |
| ENSMUSG00000046516 | Cox17      | 0.14575908   | 0.106767732 | 0.341286096 |
| ENSMUSG00000090264 | Eif4ebp3   | 0.080372873  | 0.106866855 | 0.341495551 |
| ENSMUSG00000016206 | H2-M3      | -0.168792076 | 0.106908834 | 0.341541827 |
| ENSMUSG00000018669 | Cdk5rap3   | -0.143901219 | 0.107069381 | 0.341657367 |
| ENSMUSG00000022323 | Rida       | 0.165780396  | 0.107014871 | 0.341657367 |
| ENSMUSG00000023206 | Ii15ra     | 0.160564079  | 0.107078116 | 0.341657367 |
| ENSMUSG00000027313 | Chac1      | 0.140230338  | 0.106975295 | 0.341657367 |
| ENSMUSG00000042349 | Ikbke      | -0.1690778   | 0.107082532 | 0.341657367 |
| ENSMUSG00000028954 | Nub1       | -0.167147412 | 0.10721815  | 0.34200222  |
| ENSMUSG00000051034 | Zfp11      | -0.151757029 | 0.107311113 | 0.342210869 |
| ENSMUSG00000038451 | Spsb2      | -0.159772858 | 0.107377455 | 0.342334542 |
| ENSMUSG00000004233 | Wars2      | 0.14477659   | 0.107472501 | 0.342549638 |
| ENSMUSG00000023921 | Mut        | 0.171364408  | 0.107511363 | 0.342585592 |
| ENSMUSG00000021500 | Ddx46      | 0.169379808  | 0.107612904 | 0.342689018 |
| ENSMUSG00000025001 | Hells      | 0.149310589  | 0.107588642 | 0.342689018 |
| ENSMUSG00000042066 | Tmcc2      | -0.135863664 | 0.107626589 | 0.342689018 |
| ENSMUSG00000101188 | Eif4a-ps4  | 0.170664392  | 0.107702448 | 0.342842673 |
| ENSMUSG00000030034 | Ino80b     | -0.142463857 | 0.107740559 | 0.342876115 |
| ENSMUSG00000002102 | Psmc3      | 0.130970749  | 0.107791407 | 0.342922747 |
| ENSMUSG00000074698 | Csnk2a1    | 0.161798578  | 0.107810428 | 0.342922747 |
| ENSMUSG00000038578 | Susd1      | 0.170369037  | 0.107872931 | 0.34303371  |
| ENSMUSG00000015757 | Ppil4      | 0.154618561  | 0.108074179 | 0.343158115 |
| ENSMUSG00000029247 | Paics      | 0.127016747  | 0.107989317 | 0.343158115 |
| ENSMUSG00000029664 | Tfpi2      | 0.116175534  | 0.108091691 | 0.343158115 |
| ENSMUSG00000031403 | Dkc1       | 0.153660399  | 0.10801785  | 0.343158115 |
| ENSMUSG00000040123 | Zmym5      | -0.165345784 | 0.108032022 | 0.343158115 |
| ENSMUSG00000042650 | Alkbh5     | -0.170599034 | 0.108105443 | 0.343158115 |

|                    |               |              |             |             |
|--------------------|---------------|--------------|-------------|-------------|
| ENSMUSG00000091337 | Eid1          | 0.164411533  | 0.108026972 | 0.343158115 |
| ENSMUSG00000028156 | Eif4e         | 0.151228721  | 0.10824712  | 0.343520052 |
| ENSMUSG00000032059 | Alg9          | 0.170258252  | 0.10830878  | 0.343627933 |
| ENSMUSG00000027613 | Eif6          | 0.155401047  | 0.108385883 | 0.343696974 |
| ENSMUSG00000037408 | Cnm4          | -0.169037087 | 0.108377477 | 0.343696974 |
| ENSMUSG00000007867 | lft43         | 0.07492947   | 0.108587968 | 0.34421546  |
| ENSMUSG00000009549 | Srp14         | 0.134649434  | 0.108604814 | 0.34421546  |
| ENSMUSG00000039275 | Foxk2         | -0.161205344 | 0.108633371 | 0.344218137 |
| ENSMUSG00000072612 | Gm10382       | -0.08323436  | 0.108720466 | 0.344230666 |
| ENSMUSG00000087153 | Gm6483        | -0.111027202 | 0.108692831 | 0.344230666 |
| ENSMUSG00000089911 | Mfsd14a       | -0.169279251 | 0.108680983 | 0.344230666 |
| ENSMUSG00000020642 | Rnf144a       | 0.1701277    | 0.10880971  | 0.344252596 |
| ENSMUSG00000026924 | Sec16a        | 0.12220429   | 0.108810538 | 0.344252596 |
| ENSMUSG00000099083 | Atf7          | -0.161644004 | 0.108780373 | 0.344252596 |
| ENSMUSG00000026558 | Uck2          | 0.171176445  | 0.108850497 | 0.344291322 |
| ENSMUSG00000057421 | Las1l         | 0.145319173  | 0.108946437 | 0.344507051 |
| ENSMUSG00000063354 | Slc39a4       | -0.107444716 | 0.108997741 | 0.344581557 |
| ENSMUSG00000003123 | Lipe          | -0.148236084 | 0.1091037   | 0.344705889 |
| ENSMUSG00000021096 | Ppm1a         | -0.161467867 | 0.109186906 | 0.344705889 |
| ENSMUSG00000021339 | Mrs2          | 0.159876206  | 0.109473661 | 0.344705889 |
| ENSMUSG00000026192 | Atic          | 0.167749376  | 0.109259184 | 0.344705889 |
| ENSMUSG00000028932 | Psmc2         | 0.144114546  | 0.109324613 | 0.344705889 |
| ENSMUSG00000030718 | Ppme1         | -0.15840524  | 0.109245521 | 0.344705889 |
| ENSMUSG00000031004 | Mki67         | -0.1601572   | 0.109427516 | 0.344705889 |
| ENSMUSG00000031782 | Coq9          | 0.133468563  | 0.109481099 | 0.344705889 |
| ENSMUSG00000035273 | Hpse          | -0.167800637 | 0.109200004 | 0.344705889 |
| ENSMUSG00000036934 | 4921524J17Rik | 0.155650305  | 0.109349503 | 0.344705889 |
| ENSMUSG00000037410 | Tbc1d2b       | -0.169355667 | 0.109458556 | 0.344705889 |
| ENSMUSG00000057835 | Zfp119a       | -0.15872495  | 0.109183234 | 0.344705889 |
| ENSMUSG00000066235 | Pomgnt2       | -0.143007421 | 0.109121707 | 0.344705889 |
| ENSMUSG00000071497 | Nutf2-ps1     | 0.155387021  | 0.109290422 | 0.344705889 |
| ENSMUSG00000082329 | Gm14287       | 0.168802901  | 0.109267141 | 0.344705889 |
| ENSMUSG00000116175 | LT629148.10   | -0.046118114 | 0.109472619 | 0.344705889 |
| ENSMUSG00000061887 | Ssbp3         | -0.166494343 | 0.109633971 | 0.345099735 |
| ENSMUSG00000002731 | Prkra         | -0.15307966  | 0.109662377 | 0.345101694 |
| ENSMUSG00000017002 | Slpi          | -0.186031892 | 0.109773639 | 0.345216491 |
| ENSMUSG00000028063 | Lmna          | -0.09323736  | 0.109732875 | 0.345216491 |
| ENSMUSG00000030079 | Ruvbl1        | 0.142464488  | 0.109782235 | 0.345216491 |
| ENSMUSG00000038058 | Nod1          | -0.153192553 | 0.109869013 | 0.345401925 |
| ENSMUSG00000021244 | Ylpm1         | 0.135314387  | 0.109951123 | 0.34540745  |
| ENSMUSG00000025178 | Pi4k2a        | -0.155627267 | 0.109954195 | 0.34540745  |
| ENSMUSG00000032422 | Snx14         | -0.165468284 | 0.109945588 | 0.34540745  |
| ENSMUSG00000034430 | Zxdc          | -0.168901963 | 0.110073017 | 0.3456059   |

|                     |           |              |             |             |
|---------------------|-----------|--------------|-------------|-------------|
| ENSMUSG00000062937  | Mtap      | 0.157508793  | 0.110050819 | 0.3456059   |
| ENSMUSG00000002409  | Dyrk1b    | -0.110747631 | 0.110161607 | 0.345796645 |
| ENSMUSG000000051116 | Gm8121    | -0.161801318 | 0.110265752 | 0.346036107 |
| ENSMUSG000000024182 | Axin1     | -0.167042119 | 0.110295804 | 0.346042986 |
| ENSMUSG000000039316 | Rftn1     | -0.159583919 | 0.110328881 | 0.34605935  |
| ENSMUSG00000001138  | Cnm3      | -0.133098286 | 0.110469733 | 0.346413672 |
| ENSMUSG000000026429 | Ube2t     | -0.14393827  | 0.110569115 | 0.346550334 |
| ENSMUSG000000031231 | Cox7b     | 0.125459993  | 0.110546765 | 0.346550334 |
| ENSMUSG000000030662 | Ipo5      | 0.167853677  | 0.110616851 | 0.346612489 |
| ENSMUSG00000002984  | Tomm40    | 0.16035585   | 0.110792867 | 0.346784544 |
| ENSMUSG000000026421 | Csrp1     | -0.145889087 | 0.11075301  | 0.346784544 |
| ENSMUSG000000044390 | Tigd3     | -0.158163112 | 0.110767064 | 0.346784544 |
| ENSMUSG000000048012 | Zfp473    | -0.093415241 | 0.110811356 | 0.346784544 |
| ENSMUSG000000067369 | Trmt2b    | -0.163639465 | 0.110796936 | 0.346784544 |
| ENSMUSG000000022479 | Vdr       | -0.122004276 | 0.111036038 | 0.347400158 |
| ENSMUSG000000083261 | Gm7816    | 0.144671352  | 0.11109292  | 0.347490598 |
| ENSMUSG000000022769 | Sdf2l1    | 0.159129324  | 0.111177299 | 0.34757947  |
| ENSMUSG000000078427 | Sarnp     | 0.147937333  | 0.111154037 | 0.34757947  |
| ENSMUSG000000041459 | Tardbp    | 0.165873292  | 0.111210674 | 0.347596322 |
| ENSMUSG000000025404 | R3hdm2    | -0.168121337 | 0.11128902  | 0.34775369  |
| ENSMUSG000000030602 | Pak4      | -0.166518057 | 0.111649286 | 0.348703995 |
| ENSMUSG000000061689 | Dlgap4    | -0.150220974 | 0.11164282  | 0.348703995 |
| ENSMUSG000000037720 | Tmem33    | 0.146108841  | 0.111720472 | 0.348750937 |
| ENSMUSG000000040111 | Gramd1b   | -0.133504098 | 0.111696582 | 0.348750937 |
| ENSMUSG000000029759 | Pon3      | 0.149932452  | 0.11176905  | 0.348814916 |
| ENSMUSG000000022827 | Rabl3     | 0.15438286   | 0.112002347 | 0.349327139 |
| ENSMUSG000000027122 | Arl14ep   | 0.166484889  | 0.112045674 | 0.349327139 |
| ENSMUSG000000038121 | Fam210a   | 0.160210017  | 0.11203285  | 0.349327139 |
| ENSMUSG000000091957 | Rps2-ps10 | 0.164945859  | 0.112029491 | 0.349327139 |
| ENSMUSG000000033059 | Pygb      | -0.147774416 | 0.112144913 | 0.349548799 |
| ENSMUSG000000024205 | Rpl36-ps2 | 0.168493487  | 0.112285959 | 0.349900626 |
| ENSMUSG000000042700 | Sipa1l1   | 0.152376253  | 0.112354075 | 0.350025072 |
| ENSMUSG000000015806 | Qdpr      | 0.156821235  | 0.112412689 | 0.350056932 |
| ENSMUSG000000054115 | Skp2      | -0.146191285 | 0.112423587 | 0.350056932 |
| ENSMUSG000000111277 | Rab3a     | -0.097262589 | 0.11244885  | 0.350056932 |
| ENSMUSG000000055150 | Zfp78     | 0.14340868   | 0.112513921 | 0.350171741 |
| ENSMUSG000000024018 | Ccdc167   | 0.152101698  | 0.112557259 | 0.350218865 |
| ENSMUSG000000069495 | Epc2      | 0.133313753  | 0.112681804 | 0.350518578 |
| ENSMUSG000000007682 | Dio2      | 0.162196972  | 0.112786233 | 0.350755585 |
| ENSMUSG000000029022 | Miip      | -0.158199557 | 0.112861558 | 0.350901981 |
| ENSMUSG000000021051 | Ppp2r5e   | -0.16699064  | 0.113010224 | 0.35118839  |
| ENSMUSG000000023495 | Pcbp4     | -0.048159923 | 0.112982869 | 0.35118839  |
| ENSMUSG000000037613 | Tnfrsf23  | 0.110847047  | 0.113060579 | 0.35125699  |

|                    |           |              |             |             |
|--------------------|-----------|--------------|-------------|-------------|
| ENSMUSG00000030720 | Cln3      | -0.15044658  | 0.113095014 | 0.351276112 |
| ENSMUSG00000037992 | Rara      | -0.08012182  | 0.113158649 | 0.351385896 |
| ENSMUSG00000111497 | Gm38431   | -0.132077818 | 0.11323645  | 0.351539601 |
| ENSMUSG00000021917 | Spcs1     | 0.139578292  | 0.11337866  | 0.351649825 |
| ENSMUSG00000022394 | L3mbtl2   | -0.158073464 | 0.113389075 | 0.351649825 |
| ENSMUSG00000030199 | Etv6      | -0.164133185 | 0.11338505  | 0.351649825 |
| ENSMUSG00000059305 | Vpreb1    | 0.119863649  | 0.113365816 | 0.351649825 |
| ENSMUSG00000062075 | Lmnb2     | -0.151896883 | 0.113413509 | 0.351649825 |
| ENSMUSG00000060681 | Slc9a6    | -0.156210051 | 0.113499156 | 0.351827555 |
| ENSMUSG00000038084 | Opa1      | 0.14572924   | 0.113535038 | 0.351850974 |
| ENSMUSG00000031165 | Was       | -0.167126047 | 0.11359264  | 0.351941677 |
| ENSMUSG00000041649 | Klf8      | 0.043860869  | 0.113717714 | 0.352241328 |
| ENSMUSG00000037458 | Azin1     | 0.139578959  | 0.113752712 | 0.352261889 |
| ENSMUSG00000029763 | Exoc4     | -0.16419397  | 0.113817816 | 0.352375646 |
| ENSMUSG00000000301 | Pemt      | 0.160659882  | 0.114014049 | 0.352414655 |
| ENSMUSG00000001098 | Kctd10    | -0.157419693 | 0.114029023 | 0.352414655 |
| ENSMUSG00000020453 | Patz1     | 0.123646856  | 0.113956307 | 0.352414655 |
| ENSMUSG00000051185 | Fam174a   | 0.158042203  | 0.113863786 | 0.352414655 |
| ENSMUSG00000068114 | Ccdc134   | -0.165087689 | 0.113998649 | 0.352414655 |
| ENSMUSG00000094248 | Hist1h2ao | -0.141687936 | 0.114004136 | 0.352414655 |
| ENSMUSG00000098404 | Mrip-ps   | -0.161080487 | 0.113951914 | 0.352414655 |
| ENSMUSG00000018761 | Mpdu1     | 0.160574096  | 0.114075557 | 0.35243599  |
| ENSMUSG00000021998 | Lcp1      | -0.157821586 | 0.114121049 | 0.35243599  |
| ENSMUSG00000114871 | Gm21370   | -0.164559695 | 0.114092772 | 0.35243599  |
| ENSMUSG00000038546 | Ranbp9    | -0.16552731  | 0.114167474 | 0.352491723 |
| ENSMUSG00000018899 | Irf1      | -0.163009855 | 0.114285139 | 0.352679681 |
| ENSMUSG00000033233 | Trim45    | 0.16047761   | 0.11426134  | 0.352679681 |
| ENSMUSG00000074825 | Itpripl1  | -0.158094199 | 0.114366243 | 0.3528423   |
| ENSMUSG00000113890 | Gm48368   | 0.153309482  | 0.114400705 | 0.352860977 |
| ENSMUSG00000030786 | Itgam     | -0.134135832 | 0.11443081  | 0.35286621  |
| ENSMUSG00000056612 | Ppp1r14b  | 0.153396046  | 0.114572776 | 0.353216295 |
| ENSMUSG00000031386 | Hcfc1     | 0.164453496  | 0.11464416  | 0.353348662 |
| ENSMUSG00000021493 | Pdlim7    | -0.164374663 | 0.114746165 | 0.35339668  |
| ENSMUSG00000027995 | Tlr2      | 0.166061385  | 0.114766107 | 0.35339668  |
| ENSMUSG00000044461 | Shisa2    | 0.11592741   | 0.114773545 | 0.35339668  |
| ENSMUSG00000105529 | Gm9480    | 0.08461583   | 0.114740705 | 0.35339668  |
| ENSMUSG00000019143 | Hars2     | -0.162880798 | 0.114929398 | 0.353545182 |
| ENSMUSG00000026946 | Nmi       | 0.158214534  | 0.114880001 | 0.353545182 |
| ENSMUSG00000028497 | Hacd4     | -0.165840799 | 0.114982831 | 0.353545182 |
| ENSMUSG00000031487 | Brf2      | -0.157002554 | 0.114992556 | 0.353545182 |
| ENSMUSG00000040464 | Gtpbp10   | 0.159159537  | 0.114966077 | 0.353545182 |
| ENSMUSG00000091639 | Gm3756    | 0.129470215  | 0.114905841 | 0.353545182 |
| ENSMUSG00000025193 | Cutc      | 0.134272672  | 0.115045708 | 0.353621068 |

|                    |               |              |             |             |
|--------------------|---------------|--------------|-------------|-------------|
| ENSMUSG00000030970 | Ctbp2         | -0.15910465  | 0.115089925 | 0.35366379  |
| ENSMUSG00000079442 | St6galnac4    | 0.14498182   | 0.115116553 | 0.35366379  |
| ENSMUSG00000035078 | Mtmr9         | 0.160758969  | 0.115343281 | 0.354272724 |
| ENSMUSG00000023044 | Csad          | -0.147260321 | 0.115516151 | 0.354634343 |
| ENSMUSG00000038884 | A230050P20Rik | -0.15693444  | 0.115518119 | 0.354634343 |
| ENSMUSG00000000276 | Dgke          | -0.152885328 | 0.115621384 | 0.354775992 |
| ENSMUSG00000108312 | Gm44521       | -0.157360098 | 0.115599122 | 0.354775992 |
| ENSMUSG00000091896 | Ube2d2a       | -0.163415198 | 0.115707973 | 0.354953998 |
| ENSMUSG00000027936 | Crtc2         | -0.161951451 | 0.115857235 | 0.354973536 |
| ENSMUSG00000039153 | Runx2         | 0.160793851  | 0.115755401 | 0.354973536 |
| ENSMUSG00000041995 | Zbed3         | -0.145838207 | 0.115832928 | 0.354973536 |
| ENSMUSG00000045751 | Mms22l        | 0.165941784  | 0.115789236 | 0.354973536 |
| ENSMUSG00000082402 | Gm15621       | 0.088284338  | 0.115848744 | 0.354973536 |
| ENSMUSG00000021624 | Cd180         | -0.101014061 | 0.11624331  | 0.355907762 |
| ENSMUSG00000032244 | Fem1b         | 0.161675223  | 0.116222242 | 0.355907762 |
| ENSMUSG00000036712 | Cyld          | -0.158477333 | 0.116248111 | 0.355907762 |
| ENSMUSG00000031432 | Prps1         | 0.164393972  | 0.116467673 | 0.35640428  |
| ENSMUSG00000053310 | Nrgn          | -0.160428403 | 0.116440101 | 0.35640428  |
| ENSMUSG00000060244 | Alyref2       | -0.153550566 | 0.116554694 | 0.356582721 |
| ENSMUSG00000058159 | T2            | -0.06469834  | 0.116610404 | 0.356665312 |
| ENSMUSG00000091421 | Gm4202        | -0.163452034 | 0.116727701 | 0.356848333 |
| ENSMUSG00000112808 | Gm4739        | 0.158306375  | 0.116699741 | 0.356848333 |
| ENSMUSG00000036246 | Gmip          | -0.163977228 | 0.116763835 | 0.356870964 |
| ENSMUSG00000005899 | Smpd4         | -0.134953364 | 0.116841076 | 0.357019191 |
| ENSMUSG00000113368 | Gm10054       | 0.086076067  | 0.116918391 | 0.357167569 |
| ENSMUSG00000024817 | Uhrf2         | -0.163121338 | 0.116967677 | 0.357230272 |
| ENSMUSG00000024999 | Noc3l         | 0.164884785  | 0.117184431 | 0.357804281 |
| ENSMUSG00000041263 | Rusc1         | -0.163415484 | 0.117380071 | 0.358313556 |
| ENSMUSG00000015759 | Cnih1         | 0.145886217  | 0.117619797 | 0.35886895  |
| ENSMUSG00000016552 | Foxred2       | -0.138816749 | 0.117595117 | 0.35886895  |
| ENSMUSG00000064326 | Siva1         | 0.140699817  | 0.117659072 | 0.358900622 |
| ENSMUSG00000022965 | Ifngr2        | -0.156975973 | 0.117777685 | 0.359086063 |
| ENSMUSG00000039050 | Osbpl2        | -0.160823329 | 0.11775387  | 0.359086063 |
| ENSMUSG00000026536 | Ifi211        | -0.13447647  | 0.117911958 | 0.359268318 |
| ENSMUSG00000032246 | Calml4        | 0.084624411  | 0.117953448 | 0.359268318 |
| ENSMUSG00000057691 | Zfp746        | -0.163112323 | 0.117982084 | 0.359268318 |
| ENSMUSG00000067931 | Zfp948        | -0.154610879 | 0.117960817 | 0.359268318 |
| ENSMUSG00000070426 | Rnf121        | 0.16468595   | 0.117932382 | 0.359268318 |
| ENSMUSG00000030257 | Srgap3        | -0.073132549 | 0.118017049 | 0.359286706 |
| ENSMUSG00000000420 | Galnt1        | -0.139995006 | 0.118431824 | 0.360329341 |
| ENSMUSG00000003068 | Stk11         | 0.135756289  | 0.1186023   | 0.360329341 |
| ENSMUSG00000005681 | Apoa2         | 0.087338904  | 0.118649653 | 0.360329341 |
| ENSMUSG00000009894 | Snap47        | 0.163950466  | 0.118641701 | 0.360329341 |

|                    |               |              |             |             |
|--------------------|---------------|--------------|-------------|-------------|
| ENSMUSG00000015217 | Hmgb3         | 0.164665517  | 0.11843698  | 0.360329341 |
| ENSMUSG00000021715 | Cwc27         | 0.157583566  | 0.118694393 | 0.360329341 |
| ENSMUSG00000026012 | Cd28          | -0.143847692 | 0.118794674 | 0.360329341 |
| ENSMUSG00000028882 | Ppp1r8        | 0.164052519  | 0.118747609 | 0.360329341 |
| ENSMUSG00000051341 | Zfp52         | -0.163773061 | 0.118768161 | 0.360329341 |
| ENSMUSG00000052698 | Tln2          | 0.111767444  | 0.11871287  | 0.360329341 |
| ENSMUSG00000053580 | Tanc2         | -0.072236019 | 0.11856941  | 0.360329341 |
| ENSMUSG00000059033 | Rpl18a-ps1    | 0.102576369  | 0.118613794 | 0.360329341 |
| ENSMUSG00000068744 | Psrc1         | -0.157938621 | 0.118744416 | 0.360329341 |
| ENSMUSG00000080846 | Gm13379       | 0.086651399  | 0.118657585 | 0.360329341 |
| ENSMUSG00000090164 | BC035044      | -0.152290882 | 0.118659454 | 0.360329341 |
| ENSMUSG00000032263 | Bckdhb        | 0.146655276  | 0.118933531 | 0.360420396 |
| ENSMUSG00000032598 | Nckipsd       | -0.15242835  | 0.118877497 | 0.360420396 |
| ENSMUSG00000039782 | Cpeb2         | -0.052742931 | 0.118940762 | 0.360420396 |
| ENSMUSG00000063953 | Amd2          | 0.108188812  | 0.118928245 | 0.360420396 |
| ENSMUSG00000074283 | Zfp109        | -0.114904623 | 0.119023029 | 0.360581717 |
| ENSMUSG00000045594 | Glb1          | -0.139025895 | 0.119080397 | 0.360667548 |
| ENSMUSG00000032126 | Hmbs          | 0.135740632  | 0.119129063 | 0.360714242 |
| ENSMUSG00000050490 | Gm8394        | 0.091632398  | 0.119175553 | 0.360714242 |
| ENSMUSG00000071533 | Pcnp          | 0.147664988  | 0.11918988  | 0.360714242 |
| ENSMUSG00000073489 | Ifi204        | -0.103917323 | 0.119211977 | 0.360714242 |
| ENSMUSG00000069755 | Zfp125        | -0.158733468 | 0.119313264 | 0.360932795 |
| ENSMUSG00000021916 | Glt8d1        | -0.159909662 | 0.119470971 | 0.361321874 |
| ENSMUSG00000063576 | Klhdc3        | -0.144236996 | 0.119624927 | 0.361611395 |
| ENSMUSG00000105641 | Gm5853        | 0.089672383  | 0.119608897 | 0.361611395 |
| ENSMUSG00000018042 | Cyb5r3        | -0.141770014 | 0.119686997 | 0.361710995 |
| ENSMUSG00000018820 | Zfyve27       | -0.151094051 | 0.119866509 | 0.361751155 |
| ENSMUSG00000019471 | Cdc37         | 0.13692277   | 0.119925998 | 0.361751155 |
| ENSMUSG00000025495 | Ptdss2        | -0.160760932 | 0.119889864 | 0.361751155 |
| ENSMUSG00000027454 | Gins1         | 0.155706771  | 0.119883295 | 0.361751155 |
| ENSMUSG00000029882 | 2210010C04Rik | -0.103436949 | 0.119876506 | 0.361751155 |
| ENSMUSG00000033813 | Tcea1         | 0.126084043  | 0.119930617 | 0.361751155 |
| ENSMUSG00000049922 | Slc35c1       | -0.15951727  | 0.119933279 | 0.361751155 |
| ENSMUSG00000074754 | Smim26        | 0.157034194  | 0.11983403  | 0.361751155 |
| ENSMUSG00000020225 | Tmbim4        | 0.120849053  | 0.119993003 | 0.361773862 |
| ENSMUSG00000020232 | Hmg20b        | -0.162679673 | 0.119999059 | 0.361773862 |
| ENSMUSG00000038014 | Fam120a       | 0.161585192  | 0.120042771 | 0.361817826 |
| ENSMUSG00000083390 | Gm13121       | 0.089588913  | 0.12033465  | 0.36260958  |
| ENSMUSG00000025786 | Zdhhc3        | 0.14057457   | 0.120364292 | 0.362610933 |
| ENSMUSG00000030850 | Ate1          | 0.156559399  | 0.120402349 | 0.362637628 |
| ENSMUSG00000036333 | Kidins220     | 0.086130492  | 0.120593425 | 0.363125073 |
| ENSMUSG00000030148 | Clec4a2       | -0.157311588 | 0.120714699 | 0.363383014 |
| ENSMUSG00000047115 | Fam221a       | 0.149479481  | 0.120737597 | 0.363383014 |

|                    |           |              |             |             |
|--------------------|-----------|--------------|-------------|-------------|
| ENSMUSG00000027430 | Dtd1      | 0.155508098  | 0.120809976 | 0.363512768 |
| ENSMUSG00000023707 | Ogfod2    | 0.149787406  | 0.120844316 | 0.363528033 |
| ENSMUSG00000028333 | Anp32b    | 0.138874623  | 0.120924961 | 0.363682552 |
| ENSMUSG00000020986 | Sec23a    | -0.15488379  | 0.121079825 | 0.363857239 |
| ENSMUSG00000023036 | Pcdhgc4   | 0.046679789  | 0.121132958 | 0.363857239 |
| ENSMUSG00000028607 | Cpt2      | -0.154902013 | 0.121158807 | 0.363857239 |
| ENSMUSG00000037405 | Icam1     | 0.158861959  | 0.121053955 | 0.363857239 |
| ENSMUSG00000041750 | Cd1d2     | -0.089306368 | 0.121137347 | 0.363857239 |
| ENSMUSG00000084328 | Gm14046   | 0.126393997  | 0.121155355 | 0.363857239 |
| ENSMUSG00000039531 | Zup1      | -0.160561126 | 0.121199686 | 0.363892022 |
| ENSMUSG00000027472 | Pdrg1     | -0.137379331 | 0.121332599 | 0.364203049 |
| ENSMUSG00000024235 | Map3k8    | -0.153867582 | 0.12142822  | 0.36440201  |
| ENSMUSG00000047454 | Gphn      | 0.09167757   | 0.121464096 | 0.364421628 |
| ENSMUSG00000052144 | Ppp4r2    | -0.157380679 | 0.121531828 | 0.364448777 |
| ENSMUSG00000055725 | Paqr3     | -0.110608536 | 0.121520932 | 0.364448777 |
| ENSMUSG00000018774 | Cd68      | -0.153287186 | 0.121763407 | 0.364790949 |
| ENSMUSG00000019088 | Dnase1l1  | -0.160469329 | 0.121751302 | 0.364790949 |
| ENSMUSG00000051518 | Rps19bp1  | 0.144887433  | 0.121726548 | 0.364790949 |
| ENSMUSG00000090963 | Gm17655   | -0.160810073 | 0.121756187 | 0.364790949 |
| ENSMUSG00000026568 | Mpc2      | 0.140109022  | 0.12181756  | 0.364865182 |
| ENSMUSG00000027981 | Rnpc3     | 0.158270472  | 0.121898724 | 0.365020264 |
| ENSMUSG00000056973 | Ces1d     | 0.104877588  | 0.122011502 | 0.365269911 |
| ENSMUSG00000027263 | Tubgcp4   | -0.155692024 | 0.122047408 | 0.365289364 |
| ENSMUSG00000009621 | Vav2      | -0.057412043 | 0.122276012 | 0.365770221 |
| ENSMUSG00000015474 | Ppt2      | -0.147158611 | 0.122294052 | 0.365770221 |
| ENSMUSG00000022428 | Cby1      | 0.138209652  | 0.122309821 | 0.365770221 |
| ENSMUSG00000035890 | Rnf126    | -0.142967303 | 0.122355307 | 0.365770221 |
| ENSMUSG00000057177 | Gsk3a     | -0.137405676 | 0.122352623 | 0.365770221 |
| ENSMUSG00000001054 | Rmnd5b    | -0.143102321 | 0.12240377  | 0.365827052 |
| ENSMUSG00000005621 | Zfp592    | -0.104306113 | 0.122508877 | 0.365965069 |
| ENSMUSG00000020720 | Psm12     | 0.151627966  | 0.122494175 | 0.365965069 |
| ENSMUSG00000011382 | Dhdh      | -0.160995284 | 0.122619765 | 0.366168414 |
| ENSMUSG00000034164 | Emid1     | -0.157745778 | 0.122635907 | 0.366168414 |
| ENSMUSG00000022403 | St13      | 0.158425154  | 0.122788635 | 0.366485177 |
| ENSMUSG00000026470 | Stx6      | -0.148971374 | 0.122801007 | 0.366485177 |
| ENSMUSG00000033016 | Nfatc1    | -0.160951632 | 0.122839183 | 0.366511048 |
| ENSMUSG00000001525 | Tubb5     | 0.153279615  | 0.123062634 | 0.367034408 |
| ENSMUSG00000040225 | Prrc2c    | 0.150055795  | 0.123073691 | 0.367034408 |
| ENSMUSG00000109613 | Gm45405   | 0.08513482   | 0.123107395 | 0.367046796 |
| ENSMUSG00000031214 | Ophn1     | 0.077260259  | 0.123326055 | 0.367610494 |
| ENSMUSG00000020439 | Smtn      | -0.159484393 | 0.12341327  | 0.367782204 |
| ENSMUSG00000044231 | Nhlrc1    | -0.141464184 | 0.123470767 | 0.367817534 |
| ENSMUSG00000107369 | Gstm2-ps1 | 0.108708632  | 0.12348435  | 0.367817534 |

|                    |          |              |             |             |
|--------------------|----------|--------------|-------------|-------------|
| ENSMUSG00000042507 | Elmsan1  | 0.094085422  | 0.12352435  | 0.367848465 |
| ENSMUSG00000067768 | Xlr4b    | -0.159824809 | 0.123574873 | 0.367910715 |
| ENSMUSG00000069094 | Pde7a    | -0.159066813 | 0.123665615 | 0.368092643 |
| ENSMUSG00000003234 | Abcf3    | -0.149980814 | 0.123708985 | 0.368133517 |
| ENSMUSG00000018585 | Atox1    | 0.127378585  | 0.123753512 | 0.368177815 |
| ENSMUSG00000021262 | Evl      | -0.150171305 | 0.123798483 | 0.36822341  |
| ENSMUSG00000022556 | Hsf1     | -0.159555302 | 0.123886509 | 0.36830884  |
| ENSMUSG00000040410 | Fbxl4    | -0.157339894 | 0.123873726 | 0.36830884  |
| ENSMUSG00000037395 | Rcor3    | -0.146545247 | 0.123983792 | 0.368509853 |
| ENSMUSG00000093419 | Gm19898  | 0.154595009  | 0.124090573 | 0.368650802 |
| ENSMUSG00000116045 | Hgs      | -0.147227312 | 0.124084193 | 0.368650802 |
| ENSMUSG00000023826 | Prkn     | -0.136360182 | 0.124157711 | 0.368673901 |
| ENSMUSG00000050357 | Carmil2  | -0.120593898 | 0.124150357 | 0.368673901 |
| ENSMUSG00000036620 | Mgat4b   | -0.156425499 | 0.124244305 | 0.368754723 |
| ENSMUSG00000037007 | Zfp113   | -0.159358425 | 0.124243927 | 0.368754723 |
| ENSMUSG00000020903 | Stx8     | 0.138968884  | 0.124401449 | 0.36913292  |
| ENSMUSG00000031434 | Morc4    | -0.104996682 | 0.124514325 | 0.369291411 |
| ENSMUSG00000057469 | E2f6     | -0.159961232 | 0.124487111 | 0.369291411 |
| ENSMUSG00000029191 | Rfc1     | 0.156614046  | 0.124676422 | 0.369683896 |
| ENSMUSG00000022261 | Sdc2     | -0.160112794 | 0.124763426 | 0.369853582 |
| ENSMUSG00000004460 | Dnajb11  | 0.156292722  | 0.124965348 | 0.370269799 |
| ENSMUSG00000030057 | Cnbp     | 0.141816358  | 0.124993259 | 0.370269799 |
| ENSMUSG00000053134 | Supt7l   | -0.154870737 | 0.124969462 | 0.370269799 |
| ENSMUSG00000027881 | Prpf38b  | 0.145784939  | 0.125049794 | 0.370348948 |
| ENSMUSG00000004535 | Tax1bp1  | 0.159223211  | 0.125118936 | 0.370465388 |
| ENSMUSG00000026072 | Ii1r1    | 0.090180814  | 0.125163021 | 0.370507598 |
| ENSMUSG00000015966 | Ii17rb   | -0.116336403 | 0.125362743 | 0.370619733 |
| ENSMUSG00000020628 | Trappc12 | -0.151811903 | 0.125238519 | 0.370619733 |
| ENSMUSG00000027575 | Arfgap1  | -0.141930001 | 0.125354367 | 0.370619733 |
| ENSMUSG00000041607 | Mbp      | 0.144632059  | 0.125391233 | 0.370619733 |
| ENSMUSG00000045102 | Poln     | -0.07774296  | 0.125365083 | 0.370619733 |
| ENSMUSG00000050619 | Zscan29  | -0.159010831 | 0.125380042 | 0.370619733 |
| ENSMUSG00000081221 | Gm14760  | 0.026906576  | 0.125409769 | 0.370619733 |
| ENSMUSG00000021236 | Entpd5   | 0.155838572  | 0.1254728   | 0.370717804 |
| ENSMUSG00000026202 | Tuba4a   | 0.159335947  | 0.125772273 | 0.371144403 |
| ENSMUSG00000028295 | Smim8    | 0.15982432   | 0.125721444 | 0.371144403 |
| ENSMUSG00000028820 | Sfpq     | 0.153120993  | 0.125714591 | 0.371144403 |
| ENSMUSG00000031605 | Klhl2    | -0.133084462 | 0.125826349 | 0.371144403 |
| ENSMUSG00000032594 | Ip6k1    | -0.129508748 | 0.125725351 | 0.371144403 |
| ENSMUSG00000070495 | Ctcf1    | -0.149146384 | 0.125801865 | 0.371144403 |
| ENSMUSG00000110040 | Gm49369  | -0.12922461  | 0.125791905 | 0.371144403 |
| ENSMUSG00000036686 | Cc2d1a   | -0.155903782 | 0.126356726 | 0.372620345 |
| ENSMUSG00000020085 | Aifm2    | 0.144198219  | 0.126428715 | 0.372744141 |

|                    |          |              |             |             |
|--------------------|----------|--------------|-------------|-------------|
| ENSMUSG00000037525 | Bcdin3d  | -0.155510164 | 0.126511319 | 0.372779063 |
| ENSMUSG00000037896 | Rcor1    | 0.147126373  | 0.126530596 | 0.372779063 |
| ENSMUSG00000068141 | Gm10232  | -0.140668743 | 0.126482952 | 0.372779063 |
| ENSMUSG00000016833 | Mrps18c  | 0.151507355  | 0.126756463 | 0.372982457 |
| ENSMUSG00000038736 | Nudcd1   | 0.1574353    | 0.126809831 | 0.372982457 |
| ENSMUSG00000066232 | lpo7     | 0.061941315  | 0.126676307 | 0.372982457 |
| ENSMUSG00000070544 | Top1     | 0.148964905  | 0.126672223 | 0.372982457 |
| ENSMUSG00000081309 | Gm12397  | -0.129789445 | 0.126760915 | 0.372982457 |
| ENSMUSG00000116640 | Gm8670   | 0.083480141  | 0.126792212 | 0.372982457 |
| ENSMUSG00000117924 | Tmem223  | 0.152298559  | 0.126760802 | 0.372982457 |
| ENSMUSG00000024271 | Elp2     | -0.143903802 | 0.126911214 | 0.373015661 |
| ENSMUSG00000025646 | Atrip    | -0.134617313 | 0.12688212  | 0.373015661 |
| ENSMUSG00000067224 | Gm3695   | 0.090286861  | 0.12690423  | 0.373015661 |
| ENSMUSG00000009406 | Elk1     | -0.121803802 | 0.127053577 | 0.373257445 |
| ENSMUSG00000019876 | Pkib     | -0.157897902 | 0.127041749 | 0.373257445 |
| ENSMUSG00000035561 | Aldh1b1  | -0.156211869 | 0.127171197 | 0.373514645 |
| ENSMUSG00000078348 | Sf3b5    | 0.117821275  | 0.127392838 | 0.374075259 |
| ENSMUSG00000078521 | Aunip    | 0.142848014  | 0.127422303 | 0.374075259 |
| ENSMUSG00000046658 | Zfp316   | -0.105010561 | 0.127546696 | 0.374175133 |
| ENSMUSG00000069306 | Hist1h4m | 0.081073551  | 0.127496562 | 0.374175133 |
| ENSMUSG00000089857 | Zfp882   | -0.082116155 | 0.127522785 | 0.374175133 |
| ENSMUSG00000036450 | Hif1an   | -0.156870832 | 0.127629021 | 0.374239866 |
| ENSMUSG00000100865 | Gm9320   | 0.145019777  | 0.127604291 | 0.374239866 |
| ENSMUSG00000052373 | Mpp3     | -0.083397793 | 0.12776323  | 0.374544979 |
| ENSMUSG00000021725 | Parp8    | -0.148232884 | 0.12779472  | 0.374548896 |
| ENSMUSG00000016984 | Etaa1    | -0.143967814 | 0.127841542 | 0.374597733 |
| ENSMUSG00000005873 | Reep5    | -0.159485613 | 0.12796686  | 0.374699756 |
| ENSMUSG00000027714 | Exosc9   | 0.148601131  | 0.127960445 | 0.374699756 |
| ENSMUSG00000038208 | Pgap3    | -0.134964052 | 0.127938203 | 0.374699756 |
| ENSMUSG00000018931 | Natd1    | 0.083344607  | 0.128034876 | 0.374810557 |
| ENSMUSG00000006705 | Pknox1   | -0.144235808 | 0.128225113 | 0.375190607 |
| ENSMUSG00000025858 | Get4     | 0.134933815  | 0.128221397 | 0.375190607 |
| ENSMUSG00000096199 | Ptrhd1   | 0.149659093  | 0.12833278  | 0.375417208 |
| ENSMUSG00000002083 | Bbc3     | -0.117099399 | 0.128530316 | 0.375818045 |
| ENSMUSG00000041571 | Selenow  | -0.143628191 | 0.128504106 | 0.375818045 |
| ENSMUSG00000003062 | Stard3nl | -0.145322282 | 0.128601581 | 0.375832503 |
| ENSMUSG00000004035 | Gstm7    | -0.15653852  | 0.128642473 | 0.375832503 |
| ENSMUSG00000010376 | Nedd8    | 0.132094968  | 0.128684418 | 0.375832503 |
| ENSMUSG00000021962 | Dcp1a    | 0.124128327  | 0.128861561 | 0.375832503 |
| ENSMUSG00000022453 | Naga     | -0.156442889 | 0.12886889  | 0.375832503 |
| ENSMUSG00000025916 | Ppp1r42  | 0.073086246  | 0.12882582  | 0.375832503 |
| ENSMUSG00000031840 | Rab3a    | -0.147923852 | 0.128742741 | 0.375832503 |
| ENSMUSG00000035620 | Ric8b    | -0.154793494 | 0.128803336 | 0.375832503 |

|                    |               |              |             |             |
|--------------------|---------------|--------------|-------------|-------------|
| ENSMUSG00000038642 | Ctss          | -0.149943651 | 0.128698219 | 0.375832503 |
| ENSMUSG00000042178 | Armc5         | -0.156850569 | 0.128654573 | 0.375832503 |
| ENSMUSG00000058833 | Rex1bd        | 0.119520643  | 0.128898355 | 0.375832503 |
| ENSMUSG00000110720 | Gm46223       | -0.157108545 | 0.128796621 | 0.375832503 |
| ENSMUSG00000034773 | BC030867      | -0.156563305 | 0.128966487 | 0.375942909 |
| ENSMUSG00000028300 | C9orf72       | -0.116527133 | 0.129026021 | 0.376028203 |
| ENSMUSG00000068587 | Mgam          | 0.104633107  | 0.129142238 | 0.376278615 |
| ENSMUSG00000071648 | Rom1          | -0.140693427 | 0.129203388 | 0.376368501 |
| ENSMUSG00000018666 | Cbx1          | 0.148309765  | 0.129268866 | 0.376470947 |
| ENSMUSG00000033147 | Slc22a15      | 0.159134742  | 0.129533537 | 0.37715332  |
| ENSMUSG00000002733 | Plekha3       | -0.148220605 | 0.129598206 | 0.37725318  |
| ENSMUSG00000036061 | Smug1         | -0.147383909 | 0.129658371 | 0.377339885 |
| ENSMUSG00000024299 | Adamts10      | -0.148504179 | 0.129789111 | 0.377450215 |
| ENSMUSG00000031362 | Xlr4c         | 0.080700479  | 0.129817834 | 0.377450215 |
| ENSMUSG00000034906 | Ncaph         | -0.151462457 | 0.129774709 | 0.377450215 |
| ENSMUSG00000056234 | Ncoa4         | 0.139195839  | 0.129793178 | 0.377450215 |
| ENSMUSG00000025757 | Hspa4l        | -0.136982617 | 0.12987455  | 0.377526746 |
| ENSMUSG00000035212 | Leprot        | -0.137018958 | 0.130073776 | 0.377752249 |
| ENSMUSG00000062762 | Ei24          | -0.14565252  | 0.130016368 | 0.377752249 |
| ENSMUSG00000094127 | G530012D18Rik | -0.11586356  | 0.130048157 | 0.377752249 |
| ENSMUSG00000109398 | Gm3854        | -0.083990818 | 0.130071677 | 0.377752249 |
| ENSMUSG00000022339 | Ebag9         | -0.15651499  | 0.130486533 | 0.378617252 |
| ENSMUSG00000025145 | Lrrc45        | -0.148058167 | 0.130564286 | 0.378617252 |
| ENSMUSG00000028931 | Kcnab2        | -0.119568794 | 0.130497813 | 0.378617252 |
| ENSMUSG00000029141 | Slc4a1ap      | 0.157502469  | 0.130437397 | 0.378617252 |
| ENSMUSG00000031627 | Irf2          | -0.153551981 | 0.130426963 | 0.378617252 |
| ENSMUSG00000034152 | Exoc3         | -0.142980122 | 0.130578819 | 0.378617252 |
| ENSMUSG00000058301 | Upf1          | -0.156544039 | 0.130585002 | 0.378617252 |
| ENSMUSG00000019087 | Atp6ap1       | -0.12685277  | 0.13068649  | 0.378646348 |
| ENSMUSG00000025733 | Rhot2         | -0.128707411 | 0.130672697 | 0.378646348 |
| ENSMUSG00000035085 | 1700020L24Rik | 0.152674595  | 0.130684414 | 0.378646348 |
| ENSMUSG00000000740 | Rpl13         | 0.131266923  | 0.130801395 | 0.378839087 |
| ENSMUSG00000030611 | Mrps11        | 0.124811894  | 0.130814012 | 0.378839087 |
| ENSMUSG00000030137 | Tuba8         | 0.154721846  | 0.130891692 | 0.378975688 |
| ENSMUSG00000004562 | Arhgef40      | -0.155788754 | 0.130935593 | 0.379005492 |
| ENSMUSG00000026571 | Dcaf6         | -0.084421582 | 0.130979809 | 0.379005492 |
| ENSMUSG00000037991 | Rmi2          | -0.156192616 | 0.130993525 | 0.379005492 |
| ENSMUSG00000061313 | Ddhd2         | 0.156085715  | 0.131087015 | 0.379187659 |
| ENSMUSG00000040365 | Trim41        | 0.118174067  | 0.131397275 | 0.379996635 |
| ENSMUSG00000001768 | Rin2          | -0.098031766 | 0.131679119 | 0.38005153  |
| ENSMUSG00000007080 | Pole          | 0.154664219  | 0.131653035 | 0.38005153  |
| ENSMUSG00000017776 | Crk           | 0.132961069  | 0.131666667 | 0.38005153  |
| ENSMUSG00000019841 | Rev3l         | 0.13939859   | 0.131647059 | 0.38005153  |

|                    |               |              |             |             |
|--------------------|---------------|--------------|-------------|-------------|
| ENSMUSG00000020457 | Drg1          | 0.134623031  | 0.131489348 | 0.38005153  |
| ENSMUSG00000021009 | Ptpn21        | -0.078368815 | 0.131497488 | 0.38005153  |
| ENSMUSG00000025417 | Pip4k2c       | -0.147909012 | 0.131691634 | 0.38005153  |
| ENSMUSG00000029594 | Rbm19         | 0.15554559   | 0.131651946 | 0.38005153  |
| ENSMUSG00000075502 | Kbtbd6        | -0.149733599 | 0.131674177 | 0.38005153  |
| ENSMUSG00000035266 | Helq          | 0.15582506   | 0.131823566 | 0.380343904 |
| ENSMUSG00000042265 | Trem1         | 0.155793823  | 0.131916754 | 0.380436034 |
| ENSMUSG00000054404 | Slfn5         | -0.150631538 | 0.131889969 | 0.380436034 |
| ENSMUSG00000039634 | Zfp189        | -0.151242826 | 0.131952309 | 0.380450238 |
| ENSMUSG00000000131 | Xpo6          | -0.15441663  | 0.132135143 | 0.380800605 |
| ENSMUSG00000026696 | Vamp4         | -0.154189148 | 0.132124568 | 0.380800605 |
| ENSMUSG00000071646 | Mta2          | -0.152795735 | 0.132168224 | 0.380807587 |
| ENSMUSG00000030533 | Unc45a        | -0.152505598 | 0.132262362 | 0.38097492  |
| ENSMUSG00000033031 | Cip2a         | -0.142112506 | 0.132318316 | 0.38097492  |
| ENSMUSG00000040771 | Oard1         | 0.115115631  | 0.132309559 | 0.38097492  |
| ENSMUSG00000029625 | Cpsf4         | -0.146806829 | 0.132356638 | 0.380996942 |
| ENSMUSG00000050144 | Slc25a44      | -0.150204414 | 0.132426005 | 0.381108296 |
| ENSMUSG00000026083 | Eif5b         | 0.118049817  | 0.132467897 | 0.381124408 |
| ENSMUSG00000036553 | Sh3tc1        | -0.130448661 | 0.132492971 | 0.381124408 |
| ENSMUSG00000034867 | Ankrd27       | -0.155449955 | 0.132576799 | 0.381188985 |
| ENSMUSG00000035783 | Acta2         | 0.073258173  | 0.132573312 | 0.381188985 |
| ENSMUSG00000091586 | Cyp4f17       | -0.100856405 | 0.132661358 | 0.381343838 |
| ENSMUSG00000021639 | Gtf2h2        | 0.140487289  | 0.132766944 | 0.381431778 |
| ENSMUSG00000028568 | Btf3l4        | 0.134275338  | 0.132728591 | 0.381431778 |
| ENSMUSG00000110195 | Pde2a         | -0.096245735 | 0.132784076 | 0.381431778 |
| ENSMUSG00000020070 | Rufy2         | -0.089787277 | 0.132821012 | 0.381449662 |
| ENSMUSG00000027828 | Ssr3          | 0.150111046  | 0.132903074 | 0.381597106 |
| ENSMUSG00000016831 | Tox4          | -0.148139882 | 0.133183003 | 0.382224141 |
| ENSMUSG00000026672 | Optn          | 0.139049306  | 0.133176625 | 0.382224141 |
| ENSMUSG00000031578 | Mak16         | 0.128968521  | 0.133275541 | 0.382350217 |
| ENSMUSG00000061759 | Armt1         | 0.118823861  | 0.133288499 | 0.382350217 |
| ENSMUSG00000008129 | 4930432K21Rik | -0.084451445 | 0.133396287 | 0.382402949 |
| ENSMUSG00000025810 | Nrp1          | -0.154591886 | 0.133430028 | 0.382402949 |
| ENSMUSG00000048118 | Arid4a        | -0.132027642 | 0.133405676 | 0.382402949 |
| ENSMUSG00000101892 | 9130401M01Rik | 0.145194782  | 0.133422313 | 0.382402949 |
| ENSMUSG00000055102 | Zfp819        | 0.083812677  | 0.133510308 | 0.38254476  |
| ENSMUSG00000019179 | Mdh2          | 0.15329097   | 0.133715417 | 0.382752433 |
| ENSMUSG00000025235 | Bbs4          | -0.15435357  | 0.133698217 | 0.382752433 |
| ENSMUSG00000044308 | Ubr3          | -0.088322323 | 0.133713059 | 0.382752433 |
| ENSMUSG00000063445 | Nmral1        | 0.140108927  | 0.133736862 | 0.382752433 |
| ENSMUSG00000108294 | Gm44429       | 0.078825939  | 0.133701939 | 0.382752433 |
| ENSMUSG00000020248 | Nfyb          | 0.135312721  | 0.13388109  | 0.383076946 |
| ENSMUSG00000058922 | Gm10052       | 0.152469887  | 0.133929394 | 0.383126901 |

|                    |                |              |             |             |
|--------------------|----------------|--------------|-------------|-------------|
| ENSMUSG00000006456 | Rbm14          | -0.155977288 | 0.133990724 | 0.383214088 |
| ENSMUSG00000040236 | Trappc5        | 0.130191824  | 0.134091894 | 0.383415152 |
| ENSMUSG00000002017 | Fam98a         | 0.142282566  | 0.134276066 | 0.383765075 |
| ENSMUSG00000039968 | Rsbn1l         | 0.155410561  | 0.134254921 | 0.383765075 |
| ENSMUSG00000030750 | Nsmce1         | 0.117097     | 0.134330942 | 0.383833593 |
| ENSMUSG00000043939 | A530064D06Rik  | -0.089274936 | 0.134435098 | 0.38404286  |
| ENSMUSG00000041133 | Smc1a          | 0.122441156  | 0.134580185 | 0.384280568 |
| ENSMUSG00000043929 | Klhl15         | 0.141824176  | 0.134577163 | 0.384280568 |
| ENSMUSG00000039985 | Sinhcaf        | 0.142070975  | 0.134706621 | 0.384553193 |
| ENSMUSG00000037725 | Ckap2          | -0.147519945 | 0.134862676 | 0.384910225 |
| ENSMUSG00000028179 | Cth            | 0.07742944   | 0.134999578 | 0.38510122  |
| ENSMUSG00000033530 | Ttc7b          | -0.149345512 | 0.134995769 | 0.38510122  |
| ENSMUSG00000108609 | Gm7424         | 0.078335117  | 0.135049791 | 0.38510122  |
| ENSMUSG00000109074 | Gm45162        | 0.089760095  | 0.135053612 | 0.38510122  |
| ENSMUSG00000023330 | Dtwd1          | 0.15173584   | 0.135183543 | 0.385370619 |
| ENSMUSG00000114025 | Gm49331        | -0.12630795  | 0.135210141 | 0.385370619 |
| ENSMUSG00000022711 | Pmm2           | 0.124436643  | 0.135280313 | 0.385482168 |
| ENSMUSG00000001521 | Tulp3          | -0.15378708  | 0.135392505 | 0.385624926 |
| ENSMUSG00000074794 | Arrdc3         | -0.093218236 | 0.135390668 | 0.385624926 |
| ENSMUSG00000030742 | Lat            | -0.094063121 | 0.13566555  | 0.386314029 |
| ENSMUSG00000022337 | Emc2           | 0.127432801  | 0.135708127 | 0.386346698 |
| ENSMUSG00000022698 | Naa50          | 0.13591103   | 0.135798179 | 0.386514478 |
| ENSMUSG00000040697 | Dnajc16        | -0.108275667 | 0.13595442  | 0.386870526 |
| ENSMUSG00000079162 | Trim43b        | -0.113397016 | 0.136037684 | 0.386978494 |
| ENSMUSG00000109711 | Gm45445        | 0.094420817  | 0.136054672 | 0.386978494 |
| ENSMUSG00000032553 | Srprb          | -0.152879559 | 0.136141576 | 0.387137024 |
| ENSMUSG00000029923 | Rab19          | -0.099827517 | 0.136617088 | 0.388400286 |
| ENSMUSG00000016554 | Eif3d          | 0.147956078  | 0.136732013 | 0.38854915  |
| ENSMUSG00000077450 | Rab11b         | -0.127583056 | 0.136715223 | 0.38854915  |
| ENSMUSG00000005470 | Asf1b          | -0.136094912 | 0.136920171 | 0.38899287  |
| ENSMUSG00000040297 | Suco           | -0.125392367 | 0.136963262 | 0.38899287  |
| ENSMUSG00000050908 | Tvp23a         | -0.079566494 | 0.136982112 | 0.38899287  |
| ENSMUSG00000005674 | Tomm40l        | 0.134833049  | 0.137120499 | 0.38910024  |
| ENSMUSG00000021457 | Syk            | -0.151537393 | 0.137130056 | 0.38910024  |
| ENSMUSG00000026788 | Zbtb43         | -0.142296557 | 0.137267634 | 0.38910024  |
| ENSMUSG00000039395 | Mreg           | 0.123444046  | 0.137162983 | 0.38910024  |
| ENSMUSG00000041297 | Cdk13          | -0.152273713 | 0.137158901 | 0.38910024  |
| ENSMUSG00000056185 | Snx32          | -0.134559012 | 0.13727053  | 0.38910024  |
| ENSMUSG00000109492 | Gm33882        | 0.075697128  | 0.137229322 | 0.38910024  |
| ENSMUSG00000111559 | AEKR01077154.1 | -0.152188172 | 0.137264806 | 0.38910024  |
| ENSMUSG00000057134 | Ado            | -0.145827057 | 0.137334379 | 0.389103631 |
| ENSMUSG00000079562 | Maea           | -0.135370977 | 0.137322061 | 0.389103631 |
| ENSMUSG00000056071 | S100a9         | -0.153791229 | 0.137369689 | 0.389114916 |

|                    |               |              |             |             |
|--------------------|---------------|--------------|-------------|-------------|
| ENSMUSG00000019320 | Noxo1         | 0.039488375  | 0.137682001 | 0.389812942 |
| ENSMUSG00000054648 | Zfp869        | -0.152148936 | 0.137710264 | 0.389812942 |
| ENSMUSG00000063065 | Mapk3         | -0.127060524 | 0.137705383 | 0.389812942 |
| ENSMUSG00000004929 | Thop1         | 0.152279966  | 0.137771093 | 0.389831966 |
| ENSMUSG00000046157 | Tmem229b      | -0.140298662 | 0.137811114 | 0.389831966 |
| ENSMUSG00000075232 | Amd1          | 0.13908235   | 0.137801761 | 0.389831966 |
| ENSMUSG00000020577 | Tspan13       | -0.151114271 | 0.138079392 | 0.390501852 |
| ENSMUSG00000022799 | Arhgap31      | -0.132860748 | 0.138373496 | 0.390622089 |
| ENSMUSG00000025142 | Aspscr1       | -0.151979109 | 0.138318531 | 0.390622089 |
| ENSMUSG00000025971 | Maip1         | 0.149719174  | 0.13823928  | 0.390622089 |
| ENSMUSG00000032946 | Rasgrp2       | 0.116514599  | 0.138184589 | 0.390622089 |
| ENSMUSG00000042246 | Tmc7          | 0.087680631  | 0.138302905 | 0.390622089 |
| ENSMUSG00000071573 | Rnls          | -0.152111601 | 0.13828425  | 0.390622089 |
| ENSMUSG00000078619 | Smarcd2       | -0.148356629 | 0.138368028 | 0.390622089 |
| ENSMUSG00000083822 | Hmgb1-ps5     | 0.145304431  | 0.138309933 | 0.390622089 |
| ENSMUSG00000020657 | Dnajc27       | 0.113345679  | 0.138475142 | 0.39082021  |
| ENSMUSG00000022905 | Kpna1         | -0.145198855 | 0.138519002 | 0.390855185 |
| ENSMUSG00000026785 | Pkn3          | -0.150451348 | 0.138612767 | 0.390903419 |
| ENSMUSG00000042660 | Wdr55         | 0.14346307   | 0.13863051  | 0.390903419 |
| ENSMUSG00000049804 | Armcx4        | 0.071339723  | 0.138569429 | 0.390903419 |
| ENSMUSG00000037257 | Aagab         | -0.151211464 | 0.139037002 | 0.391693946 |
| ENSMUSG00000039676 | Capsl         | 0.126747258  | 0.139030706 | 0.391693946 |
| ENSMUSG00000062580 | Timm17a       | 0.151952468  | 0.138953743 | 0.391693946 |
| ENSMUSG00000094915 | AC168977.2    | -0.151992674 | 0.139016037 | 0.391693946 |
| ENSMUSG00000026430 | Rassf5        | -0.14580385  | 0.139129144 | 0.391864649 |
| ENSMUSG00000040848 | Sft2d2        | 0.133526887  | 0.13920565  | 0.391991244 |
| ENSMUSG00000002058 | Unc119        | 0.150773686  | 0.13944959  | 0.392380666 |
| ENSMUSG00000022185 | Acin1         | 0.147413068  | 0.13939514  | 0.392380666 |
| ENSMUSG00000036398 | Ppp1r11       | 0.119337131  | 0.139470303 | 0.392380666 |
| ENSMUSG00000056394 | Lig1          | 0.14892917   | 0.139415013 | 0.392380666 |
| ENSMUSG00000034120 | Srsf2         | 0.1547884    | 0.139621864 | 0.392718109 |
| ENSMUSG00000016018 | Mtrex         | 0.15064459   | 0.139691293 | 0.39282444  |
| ENSMUSG00000002870 | Mcm2          | -0.145229056 | 0.139777578 | 0.392910538 |
| ENSMUSG00000025203 | Scd2          | 0.068568801  | 0.139823792 | 0.392910538 |
| ENSMUSG00000027695 | Pld1          | -0.106774034 | 0.139807414 | 0.392910538 |
| ENSMUSG00000027865 | Gdap2         | -0.143194238 | 0.139848441 | 0.392910538 |
| ENSMUSG00000027360 | Hdc           | -0.151868861 | 0.139889593 | 0.392937277 |
| ENSMUSG00000068263 | Efcc1         | -0.12898936  | 0.139949339 | 0.393016219 |
| ENSMUSG00000040158 | Tax1bp3       | -0.125702114 | 0.140013659 | 0.393036937 |
| ENSMUSG00000117013 | CAA01141682.1 | -0.13344035  | 0.140020002 | 0.393036937 |
| ENSMUSG00000002812 | Flii          | 0.134252537  | 0.140056791 | 0.393038493 |
| ENSMUSG00000034675 | Dbn1          | -0.115551224 | 0.140083843 | 0.393038493 |
| ENSMUSG00000025464 | Paox          | 0.136244138  | 0.140118052 | 0.393045692 |

|                    |               |              |             |             |
|--------------------|---------------|--------------|-------------|-------------|
| ENSMUSG00000029536 | Gatc          | -0.12874176  | 0.140237457 | 0.393203036 |
| ENSMUSG00000035011 | Zbtb7a        | -0.129352833 | 0.140227117 | 0.393203036 |
| ENSMUSG00000007603 | Dus3l         | -0.127994781 | 0.140338025 | 0.393380743 |
| ENSMUSG00000029610 | Aimp2         | 0.14981874   | 0.140381494 | 0.393380743 |
| ENSMUSG00000037773 | Pced1a        | -0.1496713   | 0.140395848 | 0.393380743 |
| ENSMUSG00000030966 | Trim21        | -0.151088967 | 0.140489712 | 0.393554965 |
| ENSMUSG00000022543 | 4930451G09Rik | -0.089375589 | 0.140719396 | 0.394109498 |
| ENSMUSG00000008730 | Hipk1         | 0.123481121  | 0.140897277 | 0.394252102 |
| ENSMUSG00000019302 | Atp6v0a1      | -0.149965443 | 0.140872867 | 0.394252102 |
| ENSMUSG00000024019 | Cmtr1         | -0.150316057 | 0.140874256 | 0.394252102 |
| ENSMUSG00000038774 | Ascc3         | 0.141856597  | 0.140889071 | 0.394252102 |
| ENSMUSG00000031256 | Cstf2         | 0.133135099  | 0.1411066   | 0.394748893 |
| ENSMUSG00000025139 | Tollip        | -0.142404906 | 0.141173598 | 0.394847392 |
| ENSMUSG00000027593 | Raly          | -0.148151046 | 0.141255092 | 0.394986378 |
| ENSMUSG00000004462 | Tbccd1        | -0.15016554  | 0.14156859  | 0.395498543 |
| ENSMUSG00000020605 | Hs1bp3        | -0.139006185 | 0.141623984 | 0.395498543 |
| ENSMUSG00000049047 | Armxc3        | -0.132070018 | 0.14159535  | 0.395498543 |
| ENSMUSG00000081157 | Gm13552       | 0.146745536  | 0.141524405 | 0.395498543 |
| ENSMUSG00000083649 | Rasl2-9       | 0.073092829  | 0.141501202 | 0.395498543 |
| ENSMUSG00000109147 | 4930431P19Rik | -0.089276725 | 0.141629299 | 0.395498543 |
| ENSMUSG00000062742 | Gm5239        | 0.086006209  | 0.141704907 | 0.395620736 |
| ENSMUSG00000032413 | Rasa2         | 0.149785424  | 0.141817208 | 0.395756357 |
| ENSMUSG00000063646 | Jakmip1       | -0.114125298 | 0.141815705 | 0.395756357 |
| ENSMUSG00000024197 | Plin3         | 0.154860422  | 0.141926082 | 0.395971219 |
| ENSMUSG00000001918 | Slc1a5        | -0.145889132 | 0.142107136 | 0.396249837 |
| ENSMUSG00000005198 | Polr2a        | 0.12896206   | 0.142142947 | 0.396249837 |
| ENSMUSG00000010054 | Tusc2         | -0.128877612 | 0.142175441 | 0.396249837 |
| ENSMUSG00000022257 | Laptm4b       | 0.143522589  | 0.142185454 | 0.396249837 |
| ENSMUSG00000036009 | Mettl25       | 0.147063086  | 0.142120161 | 0.396249837 |
| ENSMUSG00000008763 | Man1a2        | 0.149609822  | 0.142259046 | 0.396365996 |
| ENSMUSG00000022702 | Hira          | -0.147605403 | 0.14233348  | 0.396400897 |
| ENSMUSG00000068686 | Cd59b         | 0.053749115  | 0.1423354   | 0.396400897 |
| ENSMUSG00000079508 | Apoo          | 0.145324613  | 0.142502802 | 0.396778146 |
| ENSMUSG00000109793 | Gm10043       | 0.095727188  | 0.142593403 | 0.39694143  |
| ENSMUSG00000022175 | Lrp10         | -0.139796192 | 0.142769894 | 0.397228622 |
| ENSMUSG00000031683 | Lsm6          | 0.133190774  | 0.142792513 | 0.397228622 |
| ENSMUSG00000035354 | Uvrag         | -0.134484593 | 0.142767734 | 0.397228622 |
| ENSMUSG00000010025 | Aldh3a2       | -0.149615756 | 0.142843146 | 0.397280502 |
| ENSMUSG00000001700 | Gramd3        | 0.150105725  | 0.143120988 | 0.397964136 |
| ENSMUSG00000006412 | Pfdn2         | 0.129705487  | 0.143179634 | 0.398038101 |
| ENSMUSG00000095253 | Zfp799        | 0.087435362  | 0.143247847 | 0.398138622 |
| ENSMUSG00000008892 | Vdac3         | 0.126392163  | 0.143365185 | 0.398318728 |
| ENSMUSG00000026814 | Eng           | -0.127179617 | 0.143408852 | 0.398318728 |

|                    |          |              |             |             |
|--------------------|----------|--------------|-------------|-------------|
| ENSMUSG00000054428 | Atpif1   | 0.140100437  | 0.143379916 | 0.398318728 |
| ENSMUSG00000000486 | Sept1    | -0.142235799 | 0.143495466 | 0.398470195 |
| ENSMUSG00000050855 | Zfp940   | -0.14597393  | 0.143527755 | 0.398470775 |
| ENSMUSG00000032050 | Rdx      | 0.145287409  | 0.143812012 | 0.398828171 |
| ENSMUSG00000032400 | Zwilch   | 0.145228296  | 0.143817034 | 0.398828171 |
| ENSMUSG00000032596 | Uba7     | -0.149009052 | 0.143780121 | 0.398828171 |
| ENSMUSG00000039164 | Naif1    | -0.148352852 | 0.143775064 | 0.398828171 |
| ENSMUSG00000114581 | Gm8277   | 0.073201987  | 0.143815075 | 0.398828171 |
| ENSMUSG00000018412 | Kansl1   | -0.148472462 | 0.143891576 | 0.398945818 |
| ENSMUSG00000091423 | Gm17509  | -0.086797895 | 0.143985138 | 0.399116133 |
| ENSMUSG00000040174 | Alkbh3   | 0.142063224  | 0.144119588 | 0.399399687 |
| ENSMUSG00000009535 | Rnmt     | 0.136978725  | 0.144385999 | 0.399659057 |
| ENSMUSG00000010045 | Tmem115  | -0.139530952 | 0.144406235 | 0.399659057 |
| ENSMUSG00000034893 | Cog3     | -0.148706876 | 0.144298743 | 0.399659057 |
| ENSMUSG00000051984 | Sec31b   | -0.057958559 | 0.144378957 | 0.399659057 |
| ENSMUSG00000078517 | Emc1     | -0.138410564 | 0.144326964 | 0.399659057 |
| ENSMUSG00000087303 | Lipo2    | -0.142346086 | 0.144394428 | 0.399659057 |
| ENSMUSG00000034377 | Tulp4    | 0.134826001  | 0.144475966 | 0.399714663 |
| ENSMUSG00000114836 | Gm18517  | 0.147456844  | 0.144490688 | 0.399714663 |
| ENSMUSG00000007589 | Tinf2    | -0.135946781 | 0.144993179 | 0.400926153 |
| ENSMUSG00000035614 | Togaram1 | -0.136824217 | 0.144963032 | 0.400926153 |
| ENSMUSG00000032712 | Resf1    | -0.146510503 | 0.145036347 | 0.400956258 |
| ENSMUSG00000017421 | Zfp207   | -0.145701619 | 0.145212882 | 0.401265674 |
| ENSMUSG00000038717 | Atp5l    | 0.122536477  | 0.145191896 | 0.401265674 |
| ENSMUSG00000036402 | Gng12    | 0.136847715  | 0.145473414 | 0.40189619  |
| ENSMUSG00000017999 | Ddx27    | 0.131494633  | 0.145653927 | 0.402037206 |
| ENSMUSG00000022021 | Diaph3   | 0.143054705  | 0.145647616 | 0.402037206 |
| ENSMUSG00000028165 | Cisd2    | 0.137119205  | 0.145607858 | 0.402037206 |
| ENSMUSG00000040811 | Eml2     | -0.080183919 | 0.145583043 | 0.402037206 |
| ENSMUSG00000014498 | Ankrd52  | -0.114676535 | 0.145732421 | 0.402105552 |
| ENSMUSG00000021772 | Nkiras1  | -0.144995758 | 0.145775807 | 0.402105552 |
| ENSMUSG00000035949 | Fbxw2    | -0.131939274 | 0.14574857  | 0.402105552 |
| ENSMUSG00000028187 | Rpf1     | 0.138688992  | 0.145837226 | 0.402185655 |
| ENSMUSG00000017664 | Slc35c2  | -0.121616597 | 0.146043693 | 0.402486955 |
| ENSMUSG00000032307 | Ube2q2   | -0.128172801 | 0.145984799 | 0.402486955 |
| ENSMUSG00000045790 | Ccdc149  | 0.124668986  | 0.146014985 | 0.402486955 |
| ENSMUSG00000031712 | Ii15     | -0.135656814 | 0.146136474 | 0.402653316 |
| ENSMUSG00000020923 | Ubtf     | 0.13080685   | 0.146371995 | 0.403212806 |
| ENSMUSG00000018661 | Cog1     | -0.146735839 | 0.146471803 | 0.403233735 |
| ENSMUSG00000110960 | Supt4b   | 0.148995713  | 0.146419089 | 0.403233735 |
| ENSMUSG00000116285 | Psme2    | 0.069515502  | 0.146476984 | 0.403233735 |
| ENSMUSG00000020629 | Adi1     | 0.146502564  | 0.146550768 | 0.403258105 |
| ENSMUSG00000052707 | Tnrc6a   | 0.141412858  | 0.146530326 | 0.403258105 |

|                    |               |              |             |             |
|--------------------|---------------|--------------|-------------|-------------|
| ENSMUSG00000005897 | Nr2c1         | -0.145176097 | 0.146775027 | 0.403275936 |
| ENSMUSG00000019715 | Gle1          | -0.145251669 | 0.14678385  | 0.403275936 |
| ENSMUSG00000028560 | Usp1          | 0.124244818  | 0.146784519 | 0.403275936 |
| ENSMUSG00000029009 | Mthfr         | -0.125232378 | 0.146711488 | 0.403275936 |
| ENSMUSG00000048796 | Cyb561d1      | -0.129734398 | 0.146686353 | 0.403275936 |
| ENSMUSG00000097989 | Gm4335        | 0.069403218  | 0.146732482 | 0.403275936 |
| ENSMUSG00000103979 | Gm20305       | 0.093084028  | 0.146730456 | 0.403275936 |
| ENSMUSG00000021000 | Mia2          | -0.141713444 | 0.146831125 | 0.403314774 |
| ENSMUSG00000061544 | Zfp229        | -0.118289021 | 0.146899039 | 0.403412107 |
| ENSMUSG00000030823 | 9130019O22Rik | -0.121813264 | 0.14703863  | 0.403440331 |
| ENSMUSG00000037204 | Atg101        | 0.141891109  | 0.146958076 | 0.403440331 |
| ENSMUSG00000040721 | Zfhx2         | -0.081132143 | 0.147039238 | 0.403440331 |
| ENSMUSG00000058932 | Gm2174        | 0.139354333  | 0.147039191 | 0.403440331 |
| ENSMUSG00000093445 | Lrch4         | -0.143412308 | 0.147126778 | 0.403591368 |
| ENSMUSG00000026155 | Smap1         | 0.122263618  | 0.147195523 | 0.403690791 |
| ENSMUSG00000002395 | Use1          | 0.12102645   | 0.147568997 | 0.403976955 |
| ENSMUSG00000013833 | Med16         | -0.139353821 | 0.147547473 | 0.403976955 |
| ENSMUSG00000015127 | Unkl          | -0.06635937  | 0.147419073 | 0.403976955 |
| ENSMUSG00000024194 | Cuta          | 0.102883376  | 0.147508831 | 0.403976955 |
| ENSMUSG00000029186 | Pi4k2b        | 0.130963861  | 0.147518274 | 0.403976955 |
| ENSMUSG00000039699 | Batf2         | -0.09016367  | 0.147564883 | 0.403976955 |
| ENSMUSG00000078851 | Hist3h2a      | -0.146126292 | 0.147592579 | 0.403976955 |
| ENSMUSG00000102478 | BC085271      | 0.061047424  | 0.147500321 | 0.403976955 |
| ENSMUSG00000117183 | AC098880.2    | -0.135430238 | 0.147377983 | 0.403976955 |
| ENSMUSG00000034667 | Xpot          | 0.147333751  | 0.147702525 | 0.404188822 |
| ENSMUSG00000030224 | Strap         | 0.132833124  | 0.14773597  | 0.404191297 |
| ENSMUSG00000040139 | 9430038I01Rik | 0.14209018   | 0.147805274 | 0.404291854 |
| ENSMUSG00000017781 | Pitpna        | -0.135043572 | 0.14797624  | 0.404492271 |
| ENSMUSG00000020647 | Ncoa1         | -0.103798485 | 0.14795412  | 0.404492271 |
| ENSMUSG00000060224 | Pyroxd2       | -0.142121622 | 0.147963359 | 0.404492271 |
| ENSMUSG00000031577 | Tti2          | -0.145339354 | 0.148071643 | 0.404663999 |
| ENSMUSG00000005378 | Bud23         | 0.12042551   | 0.148216156 | 0.404781214 |
| ENSMUSG00000015668 | Pdzd11        | 0.11613428   | 0.14827501  | 0.404781214 |
| ENSMUSG00000039943 | Plcb4         | -0.130081631 | 0.148217079 | 0.404781214 |
| ENSMUSG00000047632 | Fgfbp3        | -0.131877283 | 0.148277475 | 0.404781214 |
| ENSMUSG00000073411 | H2-D1         | -0.140593014 | 0.14818934  | 0.404781214 |
| ENSMUSG00000022664 | Slc35a5       | -0.145100721 | 0.148419094 | 0.405078788 |
| ENSMUSG00000042688 | Mapk6         | -0.136964548 | 0.148639932 | 0.405503316 |
| ENSMUSG00000096794 | Olfr905       | -0.110495394 | 0.148628718 | 0.405503316 |
| ENSMUSG00000057551 | Zfp317        | -0.145978901 | 0.148691862 | 0.405555912 |
| ENSMUSG00000104913 | Gm6560        | 0.089078087  | 0.148762074 | 0.405658336 |
| ENSMUSG00000031820 | Babam1        | 0.124088277  | 0.148968923 | 0.40613323  |
| ENSMUSG00000020375 | Rufy1         | -0.145616072 | 0.149116928 | 0.406244753 |

|                    |          |              |             |             |
|--------------------|----------|--------------|-------------|-------------|
| ENSMUSG00000020974 | Pole2    | 0.136243724  | 0.149073658 | 0.406244753 |
| ENSMUSG00000021645 | Smn1     | 0.145508831  | 0.149079446 | 0.406244753 |
| ENSMUSG00000037818 | Abhd18   | -0.108797315 | 0.149140655 | 0.406244753 |
| ENSMUSG00000029622 | Arpc1b   | -0.146097956 | 0.149206168 | 0.406245026 |
| ENSMUSG00000059742 | Kcnh7    | 0.057607841  | 0.149206152 | 0.406245026 |
| ENSMUSG00000014349 | Ube2z    | -0.146091893 | 0.149271255 | 0.406333172 |
| ENSMUSG00000043262 | Uevld    | -0.115143813 | 0.149371594 | 0.406517215 |
| ENSMUSG00000002625 | Akap8l   | -0.141753474 | 0.149430094 | 0.406587339 |
| ENSMUSG00000036181 | Hist1h1c | 0.133165133  | 0.149635722 | 0.406701378 |
| ENSMUSG00000051557 | Pusl1    | 0.136236821  | 0.149599446 | 0.406701378 |
| ENSMUSG00000064357 | mt-Atp6  | -0.149308008 | 0.149519222 | 0.406701378 |
| ENSMUSG00000068335 | Dok1     | -0.130410998 | 0.149607738 | 0.406701378 |
| ENSMUSG00000083624 | Gm12469  | 0.145908215  | 0.149542171 | 0.406701378 |
| ENSMUSG00000007617 | Homer1   | -0.114006339 | 0.14966971  | 0.406704763 |
| ENSMUSG00000001642 | Akr1b3   | 0.126791416  | 0.150094092 | 0.407462363 |
| ENSMUSG00000024012 | Mtch1    | 0.13365543   | 0.150162568 | 0.407462363 |
| ENSMUSG00000027340 | Slc23a2  | -0.120679948 | 0.150210946 | 0.407462363 |
| ENSMUSG00000030759 | Far1     | -0.126676963 | 0.150081424 | 0.407462363 |
| ENSMUSG00000032010 | Usp2     | 0.143542639  | 0.150197595 | 0.407462363 |
| ENSMUSG00000040767 | Snrnp25  | 0.142379934  | 0.150184802 | 0.407462363 |
| ENSMUSG00000059751 | Rps3a3   | 0.081308888  | 0.15011629  | 0.407462363 |
| ENSMUSG00000078920 | Ifi47    | 0.134529684  | 0.150098248 | 0.407462363 |
| ENSMUSG00000026249 | Serpine2 | 0.146896359  | 0.150290511 | 0.40758918  |
| ENSMUSG00000021218 | Gdi2     | 0.135240752  | 0.150421848 | 0.407856315 |
| ENSMUSG00000039725 | Trp53rka | -0.144295242 | 0.150768436 | 0.408706841 |
| ENSMUSG00000073125 | Xlr3b    | -0.049105466 | 0.150807934 | 0.408724712 |
| ENSMUSG00000036880 | Acaa2    | 0.133995551  | 0.150843153 | 0.408730979 |
| ENSMUSG00000025511 | Tspan4   | 0.124996124  | 0.150909105 | 0.408820501 |
| ENSMUSG00000023806 | Rsph3b   | -0.135173233 | 0.151011701 | 0.409009232 |
| ENSMUSG00000031604 | Msmo1    | -0.141413016 | 0.151106856 | 0.409088547 |
| ENSMUSG00000032290 | Ptpn9    | -0.131509828 | 0.151103924 | 0.409088547 |
| ENSMUSG00000034930 | Rtkn     | -0.093099976 | 0.15114881  | 0.409105825 |
| ENSMUSG00000055760 | Gemin6   | 0.112401449  | 0.151179111 | 0.409105825 |
| ENSMUSG00000022517 | Mgrn1    | -0.123516718 | 0.151341878 | 0.409367916 |
| ENSMUSG00000028180 | Zranb2   | 0.139644404  | 0.151309245 | 0.409367916 |
| ENSMUSG00000002897 | Ii17ra   | -0.133242179 | 0.151474761 | 0.409638146 |
| ENSMUSG00000030188 | Magohb   | 0.133904148  | 0.151567323 | 0.409710059 |
| ENSMUSG00000030706 | Mrpl48   | 0.141561228  | 0.151557837 | 0.409710059 |
| ENSMUSG00000027035 | Cers6    | -0.144812632 | 0.151656863 | 0.409862901 |
| ENSMUSG00000014077 | Chp1     | 0.145227545  | 0.151845964 | 0.410205687 |
| ENSMUSG00000022160 | Mettl3   | -0.135598479 | 0.15184975  | 0.410205687 |
| ENSMUSG00000026004 | Kansl1l  | -0.145010204 | 0.152058358 | 0.410640307 |
| ENSMUSG00000114003 | Gm9616   | 0.074236715  | 0.152076758 | 0.410640307 |

|                    |            |              |             |             |
|--------------------|------------|--------------|-------------|-------------|
| ENSMUSG00000029723 | Tsc22d4    | -0.128061854 | 0.152334861 | 0.411069151 |
| ENSMUSG00000039959 | Hip1       | -0.103979198 | 0.152272525 | 0.411069151 |
| ENSMUSG00000079165 | Sap25      | -0.115358499 | 0.152322582 | 0.411069151 |
| ENSMUSG00000039774 | Galnt12    | 0.098882147  | 0.152509012 | 0.411360356 |
| ENSMUSG00000052656 | Rnf103     | -0.144978434 | 0.152490441 | 0.411360356 |
| ENSMUSG00000004798 | Ulk2       | -0.131544379 | 0.15270781  | 0.411717758 |
| ENSMUSG00000064267 | Hvcn1      | -0.139869543 | 0.152692828 | 0.411717758 |
| ENSMUSG00000024993 | Fam45a     | -0.143178764 | 0.152829241 | 0.41195573  |
| ENSMUSG00000027843 | Ptpn22     | -0.144836128 | 0.152919266 | 0.412108961 |
| ENSMUSG00000041180 | Hectd2     | 0.055826387  | 0.153010557 | 0.412265537 |
| ENSMUSG00000035245 | Eogt       | 0.050147192  | 0.153178354 | 0.412449239 |
| ENSMUSG00000038831 | Ralgps1    | -0.083393769 | 0.15315411  | 0.412449239 |
| ENSMUSG00000039220 | Ppp1r10    | -0.141070577 | 0.153169364 | 0.412449239 |
| ENSMUSG00000032491 | Nradd      | -0.081472878 | 0.153241911 | 0.412530945 |
| ENSMUSG00000074064 | Mlycd      | -0.14186074  | 0.153388381 | 0.412835772 |
| ENSMUSG00000030216 | Wbp11      | 0.125341963  | 0.153487078 | 0.412938433 |
| ENSMUSG00000036270 | Edc4       | -0.115619787 | 0.153500469 | 0.412938433 |
| ENSMUSG00000066026 | Dhrs3      | -0.14165781  | 0.153526261 | 0.412938433 |
| ENSMUSG00000019539 | Rcn3       | -0.143166382 | 0.153721919 | 0.41337518  |
| ENSMUSG00000047798 | Cd300lf    | 0.119515448  | 0.153818367 | 0.413455515 |
| ENSMUSG00000050876 | Spata31d1a | -0.066194023 | 0.153798038 | 0.413455515 |
| ENSMUSG00000011267 | Zfp296     | -0.143796264 | 0.153966116 | 0.413718626 |
| ENSMUSG00000038295 | Atg9b      | -0.097305693 | 0.153982868 | 0.413718626 |
| ENSMUSG00000030256 | Bhlhe41    | -0.143825158 | 0.154127532 | 0.414017751 |
| ENSMUSG00000038497 | Tmco3      | -0.141990714 | 0.154276844 | 0.414329228 |
| ENSMUSG00000025578 | Cbx8       | -0.14229308  | 0.154404222 | 0.414581678 |
| ENSMUSG00000038059 | Smim3      | -0.132675751 | 0.15444146  | 0.414592041 |
| ENSMUSG00000037544 | Dlgap5     | -0.119769855 | 0.154554989 | 0.414717545 |
| ENSMUSG00000046814 | Gchfr      | 0.121838858  | 0.154548358 | 0.414717545 |
| ENSMUSG00000051627 | Hist1h1e   | 0.117986834  | 0.154622798 | 0.414720313 |
| ENSMUSG00000093392 | Gm6061     | -0.141267188 | 0.154598542 | 0.414720313 |
| ENSMUSG00000028426 | Rad23b     | 0.141697501  | 0.15474445  | 0.414777906 |
| ENSMUSG00000040433 | Zbtb38     | -0.129534711 | 0.154723077 | 0.414777906 |
| ENSMUSG00000070462 | Tlnrd1     | -0.119044116 | 0.154723259 | 0.414777906 |
| ENSMUSG00000022091 | Sorbs3     | -0.088585668 | 0.15490941  | 0.41495143  |
| ENSMUSG00000028248 | Pnlsr      | -0.126474159 | 0.154882225 | 0.41495143  |
| ENSMUSG00000051149 | Adnp       | -0.075219867 | 0.154850972 | 0.41495143  |
| ENSMUSG00000022437 | Samm50     | 0.139907719  | 0.155029614 | 0.415183881 |
| ENSMUSG00000108772 | Gm6063     | 0.108213646  | 0.155152971 | 0.415424671 |
| ENSMUSG00000019822 | Smpd2      | -0.130968608 | 0.15520786  | 0.415482075 |
| ENSMUSG00000021866 | Anxa11     | -0.098569382 | 0.155315009 | 0.415679319 |
| ENSMUSG00000046718 | Bst2       | 0.120221752  | 0.155368769 | 0.415733624 |
| ENSMUSG00000006276 | Eps15l1    | -0.142519846 | 0.155456721 | 0.415879374 |

|                    |            |              |             |             |
|--------------------|------------|--------------|-------------|-------------|
| ENSMUSG0000001348  | Acp5       | 0.14063613   | 0.155602818 | 0.415959927 |
| ENSMUSG00000042286 | Stab1      | 0.143811441  | 0.155595662 | 0.415959927 |
| ENSMUSG00000066278 | Vps37b     | -0.142826453 | 0.155620786 | 0.415959927 |
| ENSMUSG00000117513 | AC126438.1 | 0.073165922  | 0.155523638 | 0.415959927 |
| ENSMUSG00000029364 | Wsb2       | -0.141596406 | 0.155661109 | 0.415978191 |
| ENSMUSG00000027669 | Gnb4       | -0.092072171 | 0.155761131 | 0.416105788 |
| ENSMUSG00000058093 | Zfp729b    | -0.064637508 | 0.155775856 | 0.416105788 |
| ENSMUSG00000002835 | Chaf1a     | -0.142963585 | 0.156080754 | 0.416830583 |
| ENSMUSG00000038056 | Kmt2c      | -0.142921931 | 0.156187792 | 0.41694772  |
| ENSMUSG00000066487 | Gm5786     | 0.070931712  | 0.156191751 | 0.41694772  |
| ENSMUSG00000025323 | Sp4        | -0.049417446 | 0.156240775 | 0.416988969 |
| ENSMUSG00000031785 | Adgrg1     | -0.066402924 | 0.156343224 | 0.41708316  |
| ENSMUSG00000068323 | Slc4a5     | -0.074142005 | 0.156312768 | 0.41708316  |
| ENSMUSG00000041945 | Mfsd9      | -0.111359039 | 0.156448795 | 0.417275173 |
| ENSMUSG00000018287 | Spag7      | 0.118442683  | 0.156666028 | 0.417286684 |
| ENSMUSG00000026889 | Rbm18      | -0.126755577 | 0.156661973 | 0.417286684 |
| ENSMUSG00000033697 | Arhgap39   | -0.143095859 | 0.156582465 | 0.417286684 |
| ENSMUSG00000044434 | Gm9791     | 0.122635673  | 0.15654225  | 0.417286684 |
| ENSMUSG00000057895 | Zfp105     | -0.107286096 | 0.15666354  | 0.417286684 |
| ENSMUSG00000081559 | Gm12411    | 0.092567055  | 0.156555872 | 0.417286684 |
| ENSMUSG00000084368 | Gm11572    | 0.142653197  | 0.156688277 | 0.417286684 |
| ENSMUSG00000054302 | Eapp       | 0.122360621  | 0.156735216 | 0.417322212 |
| ENSMUSG00000049672 | Zbtb14     | -0.143057233 | 0.156811088 | 0.417434745 |
| ENSMUSG00000008932 | Slc1a7     | -0.070487513 | 0.156932226 | 0.417462276 |
| ENSMUSG00000022686 | B3gnt5     | 0.135481597  | 0.156896918 | 0.417462276 |
| ENSMUSG00000028683 | Eif2b3     | 0.136442764  | 0.156955867 | 0.417462276 |
| ENSMUSG00000039768 | Dnajc11    | 0.120917629  | 0.156940198 | 0.417462276 |
| ENSMUSG00000031504 | Rab20      | 0.142730203  | 0.157098981 | 0.417664051 |
| ENSMUSG00000073988 | Ttpa       | 0.14271306   | 0.157081026 | 0.417664051 |
| ENSMUSG00000014856 | Tmem208    | 0.115156999  | 0.157204363 | 0.41785478  |
| ENSMUSG00000008855 | Hdac5      | -0.142545381 | 0.157416737 | 0.418017272 |
| ENSMUSG00000021400 | Wrnip1     | -0.13111866  | 0.157320298 | 0.418017272 |
| ENSMUSG00000024206 | Rfx2       | -0.097018682 | 0.157433765 | 0.418017272 |
| ENSMUSG00000024944 | Arl2       | 0.107538231  | 0.157386023 | 0.418017272 |
| ENSMUSG00000035861 | Tmprss11b  | -0.120289094 | 0.157353229 | 0.418017272 |
| ENSMUSG00000029501 | Ankle2     | -0.134113342 | 0.157469562 | 0.418022959 |
| ENSMUSG00000024969 | Mark2      | -0.139373442 | 0.157966493 | 0.419252523 |
| ENSMUSG00000032640 | Chsy1      | 0.12694986   | 0.158007616 | 0.419272078 |
| ENSMUSG00000062611 | Rps3a2     | 0.022898331  | 0.15805008  | 0.419295182 |
| ENSMUSG00000022415 | Syng1      | 0.142787815  | 0.158123192 | 0.419399566 |
| ENSMUSG00000062203 | Gspt1      | 0.124885571  | 0.158191366 | 0.419401271 |
| ENSMUSG00000116306 | AC113292.1 | -0.073473952 | 0.158163378 | 0.419401271 |
| ENSMUSG00000078502 | Gm13212    | -0.135805263 | 0.158337979 | 0.419700392 |

|                    |               |              |             |             |
|--------------------|---------------|--------------|-------------|-------------|
| ENSMUSG00000024245 | Tmem178       | -0.134960043 | 0.158401194 | 0.419778373 |
| ENSMUSG00000032202 | Rab27a        | -0.137591703 | 0.15846123  | 0.419847897 |
| ENSMUSG00000032350 | Gclc          | -0.139325936 | 0.158604618 | 0.420134142 |
| ENSMUSG00000106574 | Gm2451        | 0.092081701  | 0.158636915 | 0.420134142 |
| ENSMUSG00000043421 | Hilpda        | 0.140491179  | 0.158706791 | 0.4202296   |
| ENSMUSG00000071713 | Csf2rb        | -0.140685416 | 0.15882895  | 0.420463423 |
| ENSMUSG00000026433 | Rab29         | -0.11669321  | 0.158888582 | 0.420531659 |
| ENSMUSG00000005983 | 1700037C18Rik | 0.133119136  | 0.158984583 | 0.420606499 |
| ENSMUSG00000059975 | Zfp74         | -0.119924549 | 0.158972013 | 0.420606499 |
| ENSMUSG00000032383 | Ppib          | 0.129726291  | 0.159055997 | 0.420705822 |
| ENSMUSG00000031328 | Flna          | 0.13468507   | 0.159107131 | 0.420751475 |
| ENSMUSG00000027770 | Dhx36         | 0.126430007  | 0.159186664 | 0.42087219  |
| ENSMUSG00000041353 | Tmem29        | 0.139296225  | 0.159249993 | 0.420950023 |
| ENSMUSG00000025477 | Inpp5a        | -0.0999461   | 0.15930276  | 0.420999911 |
| ENSMUSG00000051255 | Gm6563        | 0.041125942  | 0.159348691 | 0.421031716 |
| ENSMUSG00000020526 | Znhit3        | 0.133228382  | 0.15960985  | 0.421588323 |
| ENSMUSG00000030505 | Prmt3         | -0.122803067 | 0.159655398 | 0.421588323 |
| ENSMUSG00000059195 | Gm12715       | 0.044343619  | 0.159661176 | 0.421588323 |
| ENSMUSG00000022353 | Mtss1         | 0.10748027   | 0.159771665 | 0.421790404 |
| ENSMUSG00000083567 | Gm11451       | 0.119667683  | 0.159951114 | 0.422174412 |
| ENSMUSG00000029915 | Clec5a        | 0.130654293  | 0.160062221 | 0.422310353 |
| ENSMUSG00000034617 | Mtrr          | -0.140659567 | 0.160070618 | 0.422310353 |
| ENSMUSG00000001687 | Ubl3          | -0.138606194 | 0.16019654  | 0.422373429 |
| ENSMUSG00000027404 | Snrpb         | 0.103664139  | 0.160182599 | 0.422373429 |
| ENSMUSG00000029050 | Ski           | -0.098610596 | 0.160185976 | 0.422373429 |
| ENSMUSG00000015112 | Slc25a13      | 0.119646018  | 0.160366321 | 0.422430786 |
| ENSMUSG00000020745 | Pafah1b1      | -0.141412278 | 0.160345398 | 0.422430786 |
| ENSMUSG00000027115 | Kif18a        | -0.141072588 | 0.160350886 | 0.422430786 |
| ENSMUSG00000036111 | Lmo1          | 0.139713558  | 0.160324032 | 0.422430786 |
| ENSMUSG00000039126 | Prune2        | 0.056594911  | 0.16042235  | 0.422430786 |
| ENSMUSG00000056144 | Trim34a       | -0.124875273 | 0.160395953 | 0.422430786 |
| ENSMUSG00000074026 | Gm6091        | 0.136701827  | 0.160488126 | 0.422514417 |
| ENSMUSG00000014301 | Pam16         | 0.140124527  | 0.160782858 | 0.422664064 |
| ENSMUSG00000021709 | Erbin         | 0.136343579  | 0.160662813 | 0.422664064 |
| ENSMUSG00000026484 | Rnf2          | -0.125170359 | 0.160660671 | 0.422664064 |
| ENSMUSG00000029655 | N4bp2l2       | 0.132425716  | 0.160695525 | 0.422664064 |
| ENSMUSG00000031715 | Smarca5       | 0.112001116  | 0.160799712 | 0.422664064 |
| ENSMUSG00000038943 | Prc1          | -0.117478663 | 0.160763332 | 0.422664064 |
| ENSMUSG00000050605 | Zfp61         | -0.140338659 | 0.160817194 | 0.422664064 |
| ENSMUSG00000075528 | Aarsd1        | 0.137750819  | 0.160723638 | 0.422664064 |
| ENSMUSG00000025024 | Smndc1        | 0.141588153  | 0.160872839 | 0.422720867 |
| ENSMUSG00000037697 | Ddhd1         | -0.125502712 | 0.160936128 | 0.422797724 |
| ENSMUSG00000029580 | Actb          | 0.068411475  | 0.161051092 | 0.422995013 |

|                    |               |              |             |             |
|--------------------|---------------|--------------|-------------|-------------|
| ENSMUSG00000041912 | Tdrkh         | -0.13921059  | 0.161079334 | 0.422995013 |
| ENSMUSG00000032741 | Tpcn1         | -0.141502538 | 0.161211682 | 0.423253075 |
| ENSMUSG00000031885 | Cbfb          | -0.137129109 | 0.161323585 | 0.423457366 |
| ENSMUSG00000027599 | Armc1         | 0.122280477  | 0.161379747 | 0.423515283 |
| ENSMUSG00000074890 | Lcmt2         | -0.129638891 | 0.161460007 | 0.423636406 |
| ENSMUSG00000002326 | Gmpr2         | 0.116502262  | 0.161570489 | 0.423836757 |
| ENSMUSG00000024989 | Cep55         | -0.114440516 | 0.161676202 | 0.423935003 |
| ENSMUSG00000054000 | Tusc1         | -0.101007979 | 0.161664455 | 0.423935003 |
| ENSMUSG00000032577 | Mapkapk3      | -0.128610771 | 0.161826143 | 0.424059603 |
| ENSMUSG00000048865 | Arhgap30      | -0.129577554 | 0.161758769 | 0.424059603 |
| ENSMUSG00000089762 | Ier5l         | -0.072392098 | 0.161823374 | 0.424059603 |
| ENSMUSG00000035845 | Alg12         | -0.121066858 | 0.16191185  | 0.424105248 |
| ENSMUSG00000055799 | Tcf7l1        | -0.060582077 | 0.161883134 | 0.424105248 |
| ENSMUSG00000031783 | Polr2c        | 0.12628195   | 0.162057456 | 0.424397147 |
| ENSMUSG00000029735 | Tpk1          | -0.082504007 | 0.162128466 | 0.424493607 |
| ENSMUSG00000024878 | Cbwd1         | 0.136716344  | 0.162290158 | 0.424827409 |
| ENSMUSG00000026656 | Fcgr2b        | -0.106946835 | 0.162382099 | 0.42497852  |
| ENSMUSG00000031485 | Plpbp         | -0.132108105 | 0.162483269 | 0.425153715 |
| ENSMUSG00000057130 | Txnl4a        | 0.138829579  | 0.162562184 | 0.425181067 |
| ENSMUSG00000061751 | Kalrn         | 0.085318216  | 0.162541508 | 0.425181067 |
| ENSMUSG00000020534 | Shmt1         | 0.117833404  | 0.162655152 | 0.425334662 |
| ENSMUSG00000029254 | Stap1         | 0.13976776   | 0.16271869  | 0.425378077 |
| ENSMUSG00000044566 | Cage1         | 0.078504573  | 0.162740248 | 0.425378077 |
| ENSMUSG00000061232 | H2-K1         | -0.128148162 | 0.162812568 | 0.425477574 |
| ENSMUSG00000019992 | Mtfr2         | -0.131788687 | 0.162933627 | 0.425624081 |
| ENSMUSG00000027018 | Hat1          | 0.118619717  | 0.162937163 | 0.425624081 |
| ENSMUSG00000031913 | Vps4a         | -0.131132231 | 0.163197938 | 0.42594696  |
| ENSMUSG00000074203 | G430095P16Rik | -0.133710516 | 0.163182646 | 0.42594696  |
| ENSMUSG00000078087 | Rps12l1       | 0.14160633   | 0.163197823 | 0.42594696  |
| ENSMUSG00000079477 | Rab7          | -0.138970445 | 0.163178399 | 0.42594696  |
| ENSMUSG00000024885 | Aldh3b1       | -0.137637369 | 0.163352811 | 0.426082584 |
| ENSMUSG00000052912 | Smarca5-ps    | -0.048870284 | 0.163334647 | 0.426082584 |
| ENSMUSG00000071398 | 2410004P03Rik | -0.114670495 | 0.16329855  | 0.426082584 |
| ENSMUSG00000056211 | R3hdm1        | 0.134046621  | 0.16351024  | 0.426403672 |
| ENSMUSG00000020420 | Zfp607a       | -0.13910824  | 0.163597378 | 0.426440213 |
| ENSMUSG00000026393 | Nek7          | -0.125078546 | 0.163627249 | 0.426440213 |
| ENSMUSG00000031555 | Adam9         | 0.140858092  | 0.163621819 | 0.426440213 |
| ENSMUSG00000029474 | Rnf34         | -0.138332382 | 0.163707065 | 0.426558728 |
| ENSMUSG00000035295 | Wdr38         | -0.102644444 | 0.163781505 | 0.426663186 |
| ENSMUSG00000021238 | Aldh6a1       | -0.135358937 | 0.163899989 | 0.426792822 |
| ENSMUSG00000025795 | Rassf3        | -0.133839921 | 0.163886098 | 0.426792822 |
| ENSMUSG00000004127 | Trmt10a       | 0.140290386  | 0.164029933 | 0.426820112 |
| ENSMUSG00000026575 | Nme7          | 0.132031019  | 0.164082283 | 0.426820112 |

|                    |               |              |             |             |
|--------------------|---------------|--------------|-------------|-------------|
| ENSMUSG00000031347 | Cetn2         | 0.123318828  | 0.164057401 | 0.426820112 |
| ENSMUSG00000035086 | Becn1         | -0.135150629 | 0.163999185 | 0.426820112 |
| ENSMUSG00000037674 | Rfx7          | 0.137504259  | 0.164021723 | 0.426820112 |
| ENSMUSG00000021298 | Gpr132        | -0.074563309 | 0.164238117 | 0.42686789  |
| ENSMUSG00000022136 | Dnajc3        | 0.135882539  | 0.164206669 | 0.42686789  |
| ENSMUSG00000044627 | Swi5          | 0.124697609  | 0.164163014 | 0.42686789  |
| ENSMUSG00000079293 | Clec7a        | -0.13475237  | 0.164212662 | 0.42686789  |
| ENSMUSG00000022197 | Pdzd2         | -0.090924485 | 0.164499067 | 0.427456677 |
| ENSMUSG00000020692 | Nle1          | -0.118212321 | 0.164631342 | 0.427710917 |
| ENSMUSG00000046062 | Ppp1r15b      | 0.104992405  | 0.164756936 | 0.427947699 |
| ENSMUSG00000066363 | Serpina3f     | -0.059347983 | 0.164932894 | 0.428315175 |
| ENSMUSG00000039621 | Prex1         | -0.131357562 | 0.165058306 | 0.428551258 |
| ENSMUSG00000006720 | Zfp184        | -0.101675574 | 0.165193298 | 0.428632954 |
| ENSMUSG00000031239 | Itm2a         | 0.132253186  | 0.165165346 | 0.428632954 |
| ENSMUSG00000078783 | Gm9733        | 0.136538319  | 0.165160915 | 0.428632954 |
| ENSMUSG00000029599 | Ddx54         | -0.126622937 | 0.165329742 | 0.428897395 |
| ENSMUSG00000023915 | Tnfrsf21      | -0.13802163  | 0.165566827 | 0.429422751 |
| ENSMUSG00000015314 | Slamf6        | -0.103835327 | 0.1657461   | 0.429553585 |
| ENSMUSG00000024799 | Tm7sf2        | -0.130725245 | 0.165761443 | 0.429553585 |
| ENSMUSG00000025887 | Casp12        | 0.064939884  | 0.165674847 | 0.429553585 |
| ENSMUSG00000046574 | Prr12         | 0.117106828  | 0.165740961 | 0.429553585 |
| ENSMUSG00000048921 | Zfp689        | -0.139194419 | 0.165790185 | 0.429553585 |
| ENSMUSG00000026020 | Nop58         | 0.126884801  | 0.165878778 | 0.429693493 |
| ENSMUSG00000027742 | Cog6          | -0.137693222 | 0.166070745 | 0.429943542 |
| ENSMUSG00000047731 | Wbp1l         | -0.138653516 | 0.16607915  | 0.429943542 |
| ENSMUSG00000079317 | Trappc2       | 0.124378556  | 0.16605554  | 0.429943542 |
| ENSMUSG00000026641 | Usf1          | -0.137285711 | 0.166192871 | 0.429969102 |
| ENSMUSG00000031789 | Cngb1         | 0.133478628  | 0.166148413 | 0.429969102 |
| ENSMUSG00000060198 | Gm11353       | 0.038507849  | 0.166172013 | 0.429969102 |
| ENSMUSG00000029089 | 5730480H06Rik | 0.12347659   | 0.166283833 | 0.430114845 |
| ENSMUSG00000070443 | Gm10291       | 0.065726218  | 0.166332529 | 0.430151227 |
| ENSMUSG00000036611 | Eepd1         | -0.137638622 | 0.166380564 | 0.430179411 |
| ENSMUSG00000042097 | Zfp239        | 0.134867106  | 0.166412694 | 0.430179411 |
| ENSMUSG00000036273 | Lrrk2         | 0.091014792  | 0.166476249 | 0.430254159 |
| ENSMUSG00000020074 | Ccar1         | -0.133399675 | 0.166540686 | 0.430331156 |
| ENSMUSG00000016921 | Srsf6         | 0.137997493  | 0.166688936 | 0.430466025 |
| ENSMUSG00000021578 | Ccdc127       | 0.133798631  | 0.166725527 | 0.430466025 |
| ENSMUSG00000038544 | Inip          | -0.134053505 | 0.166691889 | 0.430466025 |
| ENSMUSG00000048495 | Tyw5          | 0.136174059  | 0.166731507 | 0.430466025 |
| ENSMUSG00000036606 | Plxbn2        | 0.105404187  | 0.166899423 | 0.430777308 |
| ENSMUSG00000038975 | Rabggtb       | 0.133260949  | 0.166921438 | 0.430777308 |
| ENSMUSG00000024965 | Fermt3        | -0.116801995 | 0.167008647 | 0.430912839 |
| ENSMUSG00000028104 | Polr3gl       | -0.132431481 | 0.167100369 | 0.430945794 |

|                    |               |              |             |             |
|--------------------|---------------|--------------|-------------|-------------|
| ENSMUSG00000041765 | Ubac2         | 0.117399246  | 0.167125504 | 0.430945794 |
| ENSMUSG00000060923 | Acyp2         | 0.116061592  | 0.16709237  | 0.430945794 |
| ENSMUSG00000015247 | Nipsnap3b     | 0.1250064    | 0.167238297 | 0.431147134 |
| ENSMUSG00000063550 | Nup98         | -0.12828151  | 0.167339126 | 0.431317551 |
| ENSMUSG00000032295 | Man2c1        | -0.129477758 | 0.167651637 | 0.432033399 |
| ENSMUSG00000032040 | Dcps          | 0.110071777  | 0.167752899 | 0.432204679 |
| ENSMUSG00000083100 | Gm6044        | 0.082838121  | 0.167817792 | 0.432282205 |
| ENSMUSG00000032066 | Bco2          | 0.102386267  | 0.167863469 | 0.432287179 |
| ENSMUSG00000071637 | Cebpd         | -0.106775403 | 0.167889329 | 0.432287179 |
| ENSMUSG00000005534 | Insr          | -0.113385443 | 0.168005765 | 0.43235377  |
| ENSMUSG00000015937 | H2afy         | 0.110234215  | 0.168054424 | 0.43235377  |
| ENSMUSG00000030688 | Stard10       | -0.13756319  | 0.168013581 | 0.43235377  |
| ENSMUSG00000049119 | Fam110b       | -0.064967656 | 0.168051479 | 0.43235377  |
| ENSMUSG00000100622 | Gm20379       | 0.117138421  | 0.168312966 | 0.432929251 |
| ENSMUSG00000006281 | Tep1          | 0.134365783  | 0.168405524 | 0.432930144 |
| ENSMUSG00000023984 | Gm20517       | 0.070619216  | 0.168417878 | 0.432930144 |
| ENSMUSG00000031553 | Adam3         | 0.085825526  | 0.168393488 | 0.432930144 |
| ENSMUSG00000028779 | Pef1          | 0.132062372  | 0.168657432 | 0.433456232 |
| ENSMUSG00000037519 | Ppfia1        | 0.119941192  | 0.168707488 | 0.433495182 |
| ENSMUSG00000024293 | Esco1         | -0.119553808 | 0.168772686 | 0.433573016 |
| ENSMUSG00000091697 | Eif3s6-ps2    | 0.129670691  | 0.168879975 | 0.433758926 |
| ENSMUSG00000020621 | Rdh14         | -0.120096309 | 0.169000104 | 0.433934234 |
| ENSMUSG00000025816 | Sec61a2       | -0.13685668  | 0.169043576 | 0.433934234 |
| ENSMUSG00000081945 | Olfr607       | 0.068449467  | 0.169053036 | 0.433934234 |
| ENSMUSG00000031171 | Ftsj1         | 0.132663943  | 0.169277848 | 0.434331782 |
| ENSMUSG00000116933 | Atp5o         | -0.136954752 | 0.169253288 | 0.434331782 |
| ENSMUSG00000032560 | Dnajc13       | 0.127937923  | 0.169388962 | 0.434527117 |
| ENSMUSG00000026974 | Zmynd19       | 0.136740927  | 0.169544626 | 0.434657132 |
| ENSMUSG00000038650 | Rnh1          | -0.113634521 | 0.169514597 | 0.434657132 |
| ENSMUSG00000089847 | Timm10b       | 0.118866894  | 0.169496979 | 0.434657132 |
| ENSMUSG00000060803 | Gstp1         | 0.104138077  | 0.169617168 | 0.434753374 |
| ENSMUSG00000020537 | Drg2          | 0.106808966  | 0.169954942 | 0.435512601 |
| ENSMUSG00000026941 | Mamdc4        | 0.042191538  | 0.17004273  | 0.435512601 |
| ENSMUSG00000027131 | Emc4          | 0.125609355  | 0.170038219 | 0.435512601 |
| ENSMUSG00000054455 | Vapb          | -0.118211495 | 0.170053628 | 0.435512601 |
| ENSMUSG00000020707 | Rnf135        | -0.132551381 | 0.170281828 | 0.435885677 |
| ENSMUSG00000024122 | Pdpk1         | -0.136686861 | 0.170339673 | 0.435885677 |
| ENSMUSG00000053769 | Lysmd1        | -0.131601794 | 0.170330345 | 0.435885677 |
| ENSMUSG00000063458 | Lrmda         | -0.132926222 | 0.170309274 | 0.435885677 |
| ENSMUSG00000095742 | CAA01147332.1 | -0.136838723 | 0.170415298 | 0.435989375 |
| ENSMUSG00000030861 | Acadsb        | 0.12768147   | 0.170561848 | 0.43623751  |
| ENSMUSG00000113536 | Gm49327       | 0.048273589  | 0.170582528 | 0.43623751  |
| ENSMUSG00000032504 | Pdcd6ip       | -0.136521852 | 0.170624024 | 0.436253809 |

|                    |               |              |             |             |
|--------------------|---------------|--------------|-------------|-------------|
| ENSMUSG0000002635  | Pdcd2l        | 0.133501215  | 0.170744658 | 0.436382593 |
| ENSMUSG00000023452 | Pisd          | -0.134631375 | 0.170722687 | 0.436382593 |
| ENSMUSG00000062054 | lah1          | 0.126073244  | 0.170871876 | 0.436617891 |
| ENSMUSG00000029587 | Zfp12         | -0.133474586 | 0.170971096 | 0.436734593 |
| ENSMUSG00000042228 | Lyn           | -0.124964896 | 0.170987869 | 0.436734593 |
| ENSMUSG00000019777 | Hdac2         | 0.09843969   | 0.171136097 | 0.436933497 |
| ENSMUSG00000042759 | Apobr         | -0.078850582 | 0.171117587 | 0.436933497 |
| ENSMUSG00000020190 | Mknk2         | -0.107511184 | 0.17124018  | 0.437109388 |
| ENSMUSG00000040658 | Dnph1         | 0.117496283  | 0.171414974 | 0.437301751 |
| ENSMUSG00000045509 | Gpr150        | -0.111155411 | 0.171459283 | 0.437301751 |
| ENSMUSG00000083365 | Gm12895       | -0.072114165 | 0.171485954 | 0.437301751 |
| ENSMUSG00000083558 | Gm12896       | -0.072114165 | 0.171485954 | 0.437301751 |
| ENSMUSG00000092490 | Gm20482       | -0.037573034 | 0.171491573 | 0.437301751 |
| ENSMUSG00000004096 | Cwc15         | 0.117936016  | 0.171569999 | 0.437322175 |
| ENSMUSG00000024258 | Polr2d        | 0.130593964  | 0.171558359 | 0.437322175 |
| ENSMUSG00000025271 | Pfkfb1        | 0.116346439  | 0.171638553 | 0.437407155 |
| ENSMUSG00000001095 | Slc13a2       | -0.110123726 | 0.171730954 | 0.437482713 |
| ENSMUSG00000004931 | Apba3         | -0.122608608 | 0.171773866 | 0.437482713 |
| ENSMUSG00000038079 | Tmem237       | -0.133478524 | 0.171763787 | 0.437482713 |
| ENSMUSG00000022109 | Med4          | 0.130389633  | 0.172029881 | 0.437686021 |
| ENSMUSG00000024942 | Capn1         | -0.100794872 | 0.171928731 | 0.437686021 |
| ENSMUSG00000029152 | Ociad1        | 0.130015699  | 0.172010802 | 0.437686021 |
| ENSMUSG00000032591 | Mst1          | 0.05804167   | 0.171965291 | 0.437686021 |
| ENSMUSG00000069805 | Fbp1          | 0.132005853  | 0.17196313  | 0.437686021 |
| ENSMUSG00000045031 | Cetn4         | 0.07950784   | 0.172112906 | 0.43780758  |
| ENSMUSG00000020495 | Smg8          | 0.136253924  | 0.172155402 | 0.437826012 |
| ENSMUSG00000045210 | Vcpip1        | -0.117044821 | 0.172241782 | 0.437956023 |
| ENSMUSG00000028771 | Ptpn12        | 0.103754089  | 0.172365804 | 0.438181671 |
| ENSMUSG00000027011 | Ube2e3        | -0.136368492 | 0.172552876 | 0.438567479 |
| ENSMUSG00000035027 | Map2k2        | 0.130008312  | 0.172782517 | 0.439061302 |
| ENSMUSG00000030268 | Bcat1         | 0.070782779  | 0.172894168 | 0.439255156 |
| ENSMUSG00000021098 | 4930447C04Rik | -0.062426909 | 0.173070664 | 0.439392255 |
| ENSMUSG00000023021 | Cers5         | -0.124629486 | 0.17305025  | 0.439392255 |
| ENSMUSG00000027177 | Hipk3         | 0.132111982  | 0.173029875 | 0.439392255 |
| ENSMUSG00000029101 | Rgs12         | -0.109622348 | 0.173195756 | 0.439392255 |
| ENSMUSG00000032199 | Polr2m        | -0.130834393 | 0.173104284 | 0.439392255 |
| ENSMUSG00000041341 | Atg2b         | 0.124258773  | 0.173180345 | 0.439392255 |
| ENSMUSG00000055612 | Cdca7         | 0.123730976  | 0.173139102 | 0.439392255 |
| ENSMUSG00000059796 | Eif4a1        | 0.127967107  | 0.173339317 | 0.439666663 |
| ENSMUSG00000005682 | Pan2          | -0.134337486 | 0.173478448 | 0.439791558 |
| ENSMUSG00000026626 | Ppp2r5a       | -0.110103167 | 0.173499168 | 0.439791558 |
| ENSMUSG00000027074 | Slc43a3       | -0.134624026 | 0.173565592 | 0.439791558 |
| ENSMUSG00000032412 | Atp1b3        | 0.129256374  | 0.173452119 | 0.439791558 |

|                    |          |              |             |             |
|--------------------|----------|--------------|-------------|-------------|
| ENSMUSG00000044149 | Nkrf     | 0.086722998  | 0.173548248 | 0.439791558 |
| ENSMUSG00000037936 | Scarb1   | -0.135153601 | 0.173624404 | 0.439803015 |
| ENSMUSG00000053641 | Dennd4a  | 0.096223732  | 0.17364093  | 0.439803015 |
| ENSMUSG00000052763 | Zfp212   | -0.134276591 | 0.173679331 | 0.439810595 |
| ENSMUSG00000050549 | Fam241a  | 0.121571693  | 0.173771612 | 0.439954583 |
| ENSMUSG00000034329 | Brip1    | -0.13542922  | 0.174055682 | 0.440583987 |
| ENSMUSG00000029267 | Mtf2     | 0.131876777  | 0.174167862 | 0.440693118 |
| ENSMUSG00000046096 | Mosmo    | 0.132390229  | 0.174169754 | 0.440693118 |
| ENSMUSG00000022978 | Mis18a   | -0.12345712  | 0.1742174   | 0.440723895 |
| ENSMUSG00000051735 | Rinl     | -0.116407105 | 0.174289949 | 0.440817645 |
| ENSMUSG00000028430 | Nol6     | -0.11710916  | 0.174517835 | 0.441304159 |
| ENSMUSG00000034278 | Dnajc17  | 0.116451105  | 0.17459753  | 0.44141582  |
| ENSMUSG00000029221 | Slc30a9  | 0.134939236  | 0.17493086  | 0.441761944 |
| ENSMUSG00000030538 | Cib1     | 0.108716254  | 0.17494783  | 0.441761944 |
| ENSMUSG00000031565 | Fgfr1    | 0.125023587  | 0.17490445  | 0.441761944 |
| ENSMUSG00000037287 | Tbcel    | -0.074720762 | 0.1748391   | 0.441761944 |
| ENSMUSG00000044066 | Cep68    | -0.134650709 | 0.174783508 | 0.441761944 |
| ENSMUSG00000050930 | Map10    | -0.098725161 | 0.174842111 | 0.441761944 |
| ENSMUSG00000003873 | Bax      | 0.113677056  | 0.175138594 | 0.442063904 |
| ENSMUSG00000026274 | Pask     | -0.123203579 | 0.175106345 | 0.442063904 |
| ENSMUSG00000063810 | Alms1    | -0.116072495 | 0.175175172 | 0.442066398 |
| ENSMUSG00000006599 | Gtf2h1   | 0.131741248  | 0.17540373  | 0.442283745 |
| ENSMUSG00000020844 | Nxn      | 0.130194075  | 0.175387609 | 0.442283745 |
| ENSMUSG00000029686 | Cul1     | -0.118090805 | 0.175326274 | 0.442283745 |
| ENSMUSG00000032966 | Fkbp1a   | 0.110793259  | 0.175359525 | 0.442283745 |
| ENSMUSG00000004364 | Cul3     | -0.133176227 | 0.175508688 | 0.442419852 |
| ENSMUSG00000059552 | Trp53    | 0.113624638  | 0.175528945 | 0.442419852 |
| ENSMUSG00000022018 | Rgcc     | 0.134410519  | 0.176056751 | 0.443390288 |
| ENSMUSG00000033124 | Atg9a    | -0.117253028 | 0.176017737 | 0.443390288 |
| ENSMUSG00000046351 | Zfp322a  | -0.129870049 | 0.17604678  | 0.443390288 |
| ENSMUSG00000051285 | Pcmdt1   | -0.13666566  | 0.17597922  | 0.443390288 |
| ENSMUSG00000027339 | Rassf2   | -0.133702552 | 0.176109002 | 0.443405402 |
| ENSMUSG00000063972 | Nr6a1    | -0.118199999 | 0.176134148 | 0.443405402 |
| ENSMUSG00000027712 | Anxa5    | -0.131532509 | 0.176400679 | 0.44380653  |
| ENSMUSG00000037946 | Fgd3     | -0.133368572 | 0.176345019 | 0.44380653  |
| ENSMUSG00000061273 | Mmgt1    | 0.11045403   | 0.176378333 | 0.44380653  |
| ENSMUSG00000031609 | Sap30    | 0.131274782  | 0.176524805 | 0.44402888  |
| ENSMUSG00000022536 | Glyr1    | -0.130451661 | 0.176584809 | 0.444089878 |
| ENSMUSG00000009907 | Vps4b    | -0.128077554 | 0.176786946 | 0.444219502 |
| ENSMUSG00000021518 | Ptdss1   | -0.114416172 | 0.176689313 | 0.444219502 |
| ENSMUSG00000027195 | Hsd17b12 | 0.132849214  | 0.176813055 | 0.444219502 |
| ENSMUSG00000046808 | Atp10d   | -0.12927186  | 0.176815169 | 0.444219502 |
| ENSMUSG00000099974 | Bcl2a1d  | 0.104221033  | 0.176731385 | 0.444219502 |

|                    |          |              |             |             |
|--------------------|----------|--------------|-------------|-------------|
| ENSMUSG00000021556 | Golm1    | 0.134919932  | 0.17696359  | 0.444259992 |
| ENSMUSG00000030641 | Ddias    | -0.121571531 | 0.176924562 | 0.444259992 |
| ENSMUSG00000031144 | Syp      | -0.076588788 | 0.176922013 | 0.444259992 |
| ENSMUSG00000049878 | Rlf      | -0.134248461 | 0.176974353 | 0.444259992 |
| ENSMUSG00000015597 | Zfp318   | -0.084562722 | 0.177109484 | 0.444419576 |
| ENSMUSG00000058624 | Gda      | 0.134431674  | 0.177085786 | 0.444419576 |
| ENSMUSG00000025246 | Tbl1x    | 0.127902888  | 0.177276774 | 0.444480179 |
| ENSMUSG00000027635 | Dsn1     | -0.127449583 | 0.177172018 | 0.444480179 |
| ENSMUSG00000028833 | Ncdn     | -0.128339129 | 0.177220975 | 0.444480179 |
| ENSMUSG00000034320 | Slc26a2  | -0.117642884 | 0.177256131 | 0.444480179 |
| ENSMUSG00000032251 | Irak1bp1 | 0.132220078  | 0.177515506 | 0.444988921 |
| ENSMUSG00000039109 | F13a1    | -0.13190426  | 0.177676065 | 0.445301533 |
| ENSMUSG00000036104 | Rab3gap1 | 0.130845306  | 0.177736797 | 0.445363879 |
| ENSMUSG00000000056 | Narf     | -0.129588399 | 0.177945245 | 0.445484015 |
| ENSMUSG00000020519 | Sap30l   | -0.117568937 | 0.177955023 | 0.445484015 |
| ENSMUSG00000034429 | Zfp707   | -0.134205934 | 0.17787282  | 0.445484015 |
| ENSMUSG00000037902 | Sirpa    | -0.111424482 | 0.177893413 | 0.445484015 |
| ENSMUSG00000047459 | Dynlrb1  | 0.116751442  | 0.177964068 | 0.445484015 |
| ENSMUSG00000034462 | Pkd2     | -0.112518562 | 0.178045956 | 0.445599197 |
| ENSMUSG00000035790 | Cep19    | 0.134595865  | 0.178620934 | 0.446948151 |
| ENSMUSG00000114470 | Gm49395  | -0.119860628 | 0.178854374 | 0.447442131 |
| ENSMUSG00000036893 | Ehmt1    | -0.118912296 | 0.178921441 | 0.44747245  |
| ENSMUSG00000049807 | Arhgap23 | 0.111080001  | 0.178938544 | 0.44747245  |
| ENSMUSG00000033906 | Zdhhc15  | -0.090103076 | 0.179218905 | 0.447993161 |
| ENSMUSG00000057572 | Zbtb8os  | 0.12590043   | 0.179197751 | 0.447993161 |
| ENSMUSG00000033033 | Calhm2   | -0.127069701 | 0.179270868 | 0.448032887 |
| ENSMUSG00000002221 | Paxip1   | -0.129488472 | 0.179480543 | 0.448182114 |
| ENSMUSG00000022515 | Anks3    | -0.12751069  | 0.179510991 | 0.448182114 |
| ENSMUSG00000031939 | Taf1d    | 0.13057156   | 0.179399365 | 0.448182114 |
| ENSMUSG00000110949 | Nudt8    | 0.129361427  | 0.179422038 | 0.448182114 |
| ENSMUSG00000116347 | Gm49416  | -0.127435779 | 0.179466733 | 0.448182114 |
| ENSMUSG00000042363 | Lgalsl   | 0.121494986  | 0.17956378  | 0.448223817 |
| ENSMUSG00000109926 | Gm45808  | 0.070231444  | 0.179657149 | 0.448366776 |
| ENSMUSG00000053289 | Ddx10    | 0.125304692  | 0.179776842 | 0.448575363 |
| ENSMUSG00000034833 | Tespa1   | -0.124803812 | 0.179955315 | 0.448930502 |
| ENSMUSG00000020238 | Ncln     | -0.127565955 | 0.180046125 | 0.449066852 |
| ENSMUSG00000025764 | Jade1    | -0.108635218 | 0.180165985 | 0.449246475 |
| ENSMUSG00000025862 | Stag2    | 0.127556576  | 0.180190479 | 0.449246475 |
| ENSMUSG00000050914 | Ankrd37  | 0.07257834   | 0.18027397  | 0.449364434 |
| ENSMUSG00000021108 | Prkch    | -0.108383265 | 0.180388497 | 0.449559696 |
| ENSMUSG00000068240 | Gm11808  | 0.111821556  | 0.180561275 | 0.44990002  |
| ENSMUSG00000048310 | Pskh1    | -0.132066291 | 0.180819385 | 0.450452785 |
| ENSMUSG00000020570 | Sypl     | 0.111723344  | 0.181031473 | 0.450800306 |

|                    |               |              |             |             |
|--------------------|---------------|--------------|-------------|-------------|
| ENSMUSG00000040795 | Iqcc          | -0.120276962 | 0.181010531 | 0.450800306 |
| ENSMUSG00000028098 | Rnf115        | -0.130668427 | 0.181265755 | 0.451293234 |
| ENSMUSG00000035297 | Cops4         | 0.118518328  | 0.18132099  | 0.451340283 |
| ENSMUSG00000043832 | Clec4a3       | -0.106070004 | 0.181362984 | 0.451354363 |
| ENSMUSG00000027692 | Tnik          | -0.06279384  | 0.181410539 | 0.451382272 |
| ENSMUSG00000020668 | Kif3c         | -0.100759139 | 0.18165748  | 0.451503159 |
| ENSMUSG00000024056 | Ndc80         | -0.114363147 | 0.181561399 | 0.451503159 |
| ENSMUSG00000025534 | Gusb          | 0.11743962   | 0.181542772 | 0.451503159 |
| ENSMUSG00000029673 | Auts2         | -0.04220652  | 0.181650936 | 0.451503159 |
| ENSMUSG00000043811 | Rtn4r         | -0.094762302 | 0.181677223 | 0.451503159 |
| ENSMUSG00000080875 | Gm7332        | 0.128510241  | 0.181581127 | 0.451503159 |
| ENSMUSG00000059920 | 4930453N24Rik | 0.123731562  | 0.182024015 | 0.452192225 |
| ENSMUSG00000067148 | Polr1c        | 0.13103333   | 0.182027303 | 0.452192225 |
| ENSMUSG00000032905 | Atg12         | 0.131160267  | 0.182158837 | 0.452338048 |
| ENSMUSG00000041362 | Shtn1         | 0.060661166  | 0.182154872 | 0.452338048 |
| ENSMUSG00000010095 | Slc3a2        | 0.110511534  | 0.182432684 | 0.452384979 |
| ENSMUSG00000020462 | Cfap36        | 0.121327434  | 0.182351652 | 0.452384979 |
| ENSMUSG00000037152 | Ndufc1        | 0.133131719  | 0.182392174 | 0.452384979 |
| ENSMUSG00000046997 | Spsb4         | -0.13089634  | 0.182341798 | 0.452384979 |
| ENSMUSG00000060703 | Cd302         | 0.12983259   | 0.182252959 | 0.452384979 |
| ENSMUSG00000080928 | Hmgb1-ps6     | 0.0688989    | 0.182423449 | 0.452384979 |
| ENSMUSG00000100309 | Gm6644        | 0.11554946   | 0.18239174  | 0.452384979 |
| ENSMUSG00000026064 | Ptp4a1        | 0.060966078  | 0.182514934 | 0.452407264 |
| ENSMUSG00000028550 | Atg4c         | -0.103250168 | 0.182554114 | 0.452407264 |
| ENSMUSG00000032883 | Acsl3         | 0.119610112  | 0.182587361 | 0.452407264 |
| ENSMUSG00000039983 | Ccdc32        | 0.121076133  | 0.182490475 | 0.452407264 |
| ENSMUSG00000022636 | Alcam         | 0.092355785  | 0.182657788 | 0.4524915   |
| ENSMUSG00000007050 | Lsm2          | 0.114166699  | 0.182743038 | 0.452524883 |
| ENSMUSG00000068964 | Gm6361        | 0.125669944  | 0.182744128 | 0.452524883 |
| ENSMUSG00000001924 | Uba1          | 0.123821625  | 0.183024246 | 0.452999958 |
| ENSMUSG00000003316 | Glg1          | -0.11567202  | 0.183081861 | 0.452999958 |
| ENSMUSG00000026116 | Tmem131       | 0.097225219  | 0.183071346 | 0.452999958 |
| ENSMUSG00000026463 | Atp2b4        | -0.096584116 | 0.183061417 | 0.452999958 |
| ENSMUSG00000038127 | Ccdc50        | -0.122931569 | 0.183148859 | 0.453075478 |
| ENSMUSG00000040651 | Fam208a       | -0.130276341 | 0.183213455 | 0.453145028 |
| ENSMUSG00000020069 | Hnrnph3       | -0.111803909 | 0.183317763 | 0.453312749 |
| ENSMUSG00000003644 | Rps6ka1       | -0.122160601 | 0.183426441 | 0.453449149 |
| ENSMUSG00000004043 | Stat5a        | -0.129981128 | 0.183445936 | 0.453449149 |
| ENSMUSG00000094090 | Gm8494        | 0.128897423  | 0.183520813 | 0.453543976 |
| ENSMUSG00000078317 | F8a           | -0.128793558 | 0.183599661 | 0.453648576 |
| ENSMUSG00000032252 | Glce          | -0.079302345 | 0.18374893  | 0.453927101 |
| ENSMUSG00000027706 | Sec62         | 0.118316835  | 0.184036971 | 0.454098151 |
| ENSMUSG00000033624 | Pdpr          | -0.091480663 | 0.184125548 | 0.454098151 |

|                    |               |              |             |             |
|--------------------|---------------|--------------|-------------|-------------|
| ENSMUSG00000042364 | Snx18         | -0.131814008 | 0.184106388 | 0.454098151 |
| ENSMUSG00000045817 | Zfp36l2       | -0.123202398 | 0.18418376  | 0.454098151 |
| ENSMUSG00000048581 | E130311K13Rik | -0.128052044 | 0.184040303 | 0.454098151 |
| ENSMUSG00000056305 | Usp39         | 0.114446593  | 0.184168689 | 0.454098151 |
| ENSMUSG00000067424 | Zfp563        | -0.085282961 | 0.184104823 | 0.454098151 |
| ENSMUSG00000073016 | Uprt          | -0.104576755 | 0.183979851 | 0.454098151 |
| ENSMUSG00000090626 | Tex9          | 0.131236772  | 0.183951292 | 0.454098151 |
| ENSMUSG00000101795 | Gm5835        | 0.078211238  | 0.183964637 | 0.454098151 |
| ENSMUSG00000070271 | Gm13268       | 0.065848932  | 0.184263856 | 0.454205469 |
| ENSMUSG00000019883 | Echdc1        | 0.130502171  | 0.184367909 | 0.454371785 |
| ENSMUSG00000033450 | Tagap         | -0.12840889  | 0.184441203 | 0.454372111 |
| ENSMUSG00000035126 | Wdr78         | 0.052024331  | 0.184421778 | 0.454372111 |
| ENSMUSG00000032121 | Tmem218       | 0.126454342  | 0.184504138 | 0.454437022 |
| ENSMUSG00000027291 | Vps39         | -0.107850695 | 0.184630749 | 0.454601642 |
| ENSMUSG00000034723 | Tmx4          | 0.12357436   | 0.184644174 | 0.454601642 |
| ENSMUSG00000022295 | Atp6v1c1      | 0.12311207   | 0.184851753 | 0.454762654 |
| ENSMUSG00000024524 | Gnal          | -0.125034611 | 0.184797603 | 0.454762654 |
| ENSMUSG00000041840 | Haus1         | 0.131466435  | 0.184856021 | 0.454762654 |
| ENSMUSG00000071337 | Tia1          | 0.125876466  | 0.18482146  | 0.454762654 |
| ENSMUSG00000025037 | Maoa          | 0.122849806  | 0.185016838 | 0.455068147 |
| ENSMUSG00000007476 | Lrrc8a        | -0.111561652 | 0.185258017 | 0.455376729 |
| ENSMUSG00000017764 | Zswim1        | -0.118043716 | 0.185248728 | 0.455376729 |
| ENSMUSG00000022221 | Ripk3         | -0.102722334 | 0.185189252 | 0.455376729 |
| ENSMUSG00000091367 | Gm17711       | 0.116824123  | 0.185288945 | 0.455376729 |
| ENSMUSG00000000804 | Usp32         | -0.068815272 | 0.185551234 | 0.455412506 |
| ENSMUSG00000001014 | Icam4         | -0.128253257 | 0.185341322 | 0.455412506 |
| ENSMUSG00000017747 | Ghdc          | -0.096813592 | 0.185501119 | 0.455412506 |
| ENSMUSG00000027739 | Rab33b        | -0.125732007 | 0.185419385 | 0.455412506 |
| ENSMUSG00000042462 | Dctpp1        | 0.120114877  | 0.18545178  | 0.455412506 |
| ENSMUSG00000042626 | Shc1          | -0.127877449 | 0.185567593 | 0.455412506 |
| ENSMUSG00000055676 | Gm5069        | 0.089234321  | 0.18559682  | 0.455412506 |
| ENSMUSG00000117438 | AC122453.1    | 0.068801678  | 0.185566902 | 0.455412506 |
| ENSMUSG00000025728 | Pigq          | -0.110003843 | 0.185666608 | 0.455493765 |
| ENSMUSG00000018417 | Myo1b         | 0.097146183  | 0.185783922 | 0.455691567 |
| ENSMUSG00000034022 | Cpsf1         | -0.129115278 | 0.185933398 | 0.455858609 |
| ENSMUSG00000048076 | Arf1          | 0.134862107  | 0.185946603 | 0.455858609 |
| ENSMUSG00000111027 | Gm2981        | 0.11965168   | 0.185962126 | 0.455858609 |
| ENSMUSG00000024556 | Me2           | -0.128722436 | 0.186001958 | 0.455866284 |
| ENSMUSG00000026856 | Dolpp1        | -0.1289618   | 0.186047213 | 0.455887243 |
| ENSMUSG00000031617 | Tmem184c      | -0.130072032 | 0.186222394 | 0.456226501 |
| ENSMUSG00000020715 | Ern1          | -0.123412775 | 0.186436066 | 0.456569869 |
| ENSMUSG00000050043 | Tmx2          | -0.12930978  | 0.186427141 | 0.456569869 |
| ENSMUSG00000040548 | Tex2          | -0.116703356 | 0.186697609 | 0.457120244 |

|                    |           |              |             |             |
|--------------------|-----------|--------------|-------------|-------------|
| ENSMUSG00000030741 | Spns1     | -0.125236984 | 0.186749567 | 0.457157346 |
| ENSMUSG00000089764 | Gm16580   | 0.058157516  | 0.186799271 | 0.457188914 |
| ENSMUSG00000038696 | Mapkap1   | -0.111729313 | 0.186902044 | 0.457350333 |
| ENSMUSG00000036748 | Cuedc2    | 0.113313918  | 0.186952982 | 0.457384871 |
| ENSMUSG00000027255 | Arfgap2   | -0.118729116 | 0.187008303 | 0.457430117 |
| ENSMUSG00000026003 | Acadl     | 0.130517378  | 0.187169151 | 0.457733417 |
| ENSMUSG00000021306 | Gpr137b   | -0.038355419 | 0.187296572 | 0.457774641 |
| ENSMUSG00000029638 | Glcci1    | -0.074735717 | 0.187295192 | 0.457774641 |
| ENSMUSG00000038976 | Ppp1r9b   | -0.130153883 | 0.187237658 | 0.457774641 |
| ENSMUSG00000029627 | Zkscan14  | -0.127873142 | 0.187526977 | 0.457793989 |
| ENSMUSG00000030105 | Arl8b     | 0.112287221  | 0.187385685 | 0.457793989 |
| ENSMUSG00000031671 | Setd6     | 0.116128277  | 0.187443847 | 0.457793989 |
| ENSMUSG00000031751 | Amfr      | -0.127847617 | 0.187370219 | 0.457793989 |
| ENSMUSG00000037443 | Cep85     | -0.123335387 | 0.187489442 | 0.457793989 |
| ENSMUSG00000044285 | Gm1821    | -0.127455056 | 0.187562484 | 0.457793989 |
| ENSMUSG00000063281 | Zfp35     | 0.119828618  | 0.187526342 | 0.457793989 |
| ENSMUSG00000008318 | Relt      | -0.113413587 | 0.18765912  | 0.45780992  |
| ENSMUSG00000030264 | Thumpd3   | -0.127180563 | 0.187618818 | 0.45780992  |
| ENSMUSG00000081952 | Gm12178   | 0.039752348  | 0.187679584 | 0.45780992  |
| ENSMUSG00000020048 | Hsp90b1   | 0.130428523  | 0.187922448 | 0.457952664 |
| ENSMUSG00000031781 | Ciapin1   | 0.131822754  | 0.187846755 | 0.457952664 |
| ENSMUSG00000053536 | Cstf2t    | -0.129504222 | 0.187897968 | 0.457952664 |
| ENSMUSG00000058748 | Zfp958    | -0.128030524 | 0.187852038 | 0.457952664 |
| ENSMUSG00000074397 | Foxr1     | -0.07547677  | 0.187804115 | 0.457952664 |
| ENSMUSG00000029062 | Cdk11b    | 0.131243482  | 0.18810215  | 0.458300668 |
| ENSMUSG00000026646 | Suv39h2   | 0.130509952  | 0.188145321 | 0.45831595  |
| ENSMUSG00000026960 | Arl6ip6   | 0.125867173  | 0.188271589 | 0.458443719 |
| ENSMUSG00000060771 | Tsga10    | -0.118560764 | 0.18826807  | 0.458443719 |
| ENSMUSG00000025277 | Abhd6     | -0.11145658  | 0.188444055 | 0.458773738 |
| ENSMUSG00000046230 | Vps13a    | 0.120952584  | 0.188633283 | 0.459144426 |
| ENSMUSG00000001288 | Rarg      | -0.05578308  | 0.18904947  | 0.459344589 |
| ENSMUSG00000020964 | Sel1l     | -0.100409375 | 0.189188643 | 0.459344589 |
| ENSMUSG00000025236 | Adpgk     | -0.126224895 | 0.188814232 | 0.459344589 |
| ENSMUSG00000027823 | Gmps      | 0.104389272  | 0.189077398 | 0.459344589 |
| ENSMUSG00000038705 | Gmeb2     | -0.095420339 | 0.189045626 | 0.459344589 |
| ENSMUSG00000040596 | Pogk      | 0.078470401  | 0.188845856 | 0.459344589 |
| ENSMUSG00000042873 | Lhfpl4    | -0.091244016 | 0.189075435 | 0.459344589 |
| ENSMUSG00000044712 | Slc38a6   | 0.126802156  | 0.189136006 | 0.459344589 |
| ENSMUSG00000047749 | Zc3hav1l  | 0.118950054  | 0.188851091 | 0.459344589 |
| ENSMUSG00000059474 | Mbtd1     | -0.129574877 | 0.189168104 | 0.459344589 |
| ENSMUSG00000067344 | Rps25-ps1 | 0.103290377  | 0.189196274 | 0.459344589 |
| ENSMUSG00000071078 | Nr2c2ap   | 0.121778193  | 0.189178163 | 0.459344589 |
| ENSMUSG00000085791 | Rpl30-ps9 | 0.034560973  | 0.189092102 | 0.459344589 |

|                    |            |              |             |             |
|--------------------|------------|--------------|-------------|-------------|
| ENSMUSG00000001520 | Nrip2      | -0.078218539 | 0.18944931  | 0.459655416 |
| ENSMUSG00000022014 | Epsti1     | -0.123393512 | 0.18950933  | 0.459655416 |
| ENSMUSG00000022236 | Ropn1l     | 0.125071838  | 0.189446319 | 0.459655416 |
| ENSMUSG00000031711 | Zfp330     | 0.10523617   | 0.189470394 | 0.459655416 |
| ENSMUSG00000042426 | Dhx29      | 0.129613355  | 0.18947451  | 0.459655416 |
| ENSMUSG00000066687 | Zbtb16     | -0.075429783 | 0.189554875 | 0.459676123 |
| ENSMUSG00000001729 | Akt1       | -0.128082581 | 0.190192935 | 0.460235037 |
| ENSMUSG00000028992 | Nmnat1     | -0.116239121 | 0.190181764 | 0.460235037 |
| ENSMUSG00000030036 | Mogs       | -0.128480618 | 0.189956938 | 0.460235037 |
| ENSMUSG00000032609 | Klhdc8b    | -0.11763254  | 0.190148284 | 0.460235037 |
| ENSMUSG00000033105 | Lss        | -0.128012397 | 0.190061728 | 0.460235037 |
| ENSMUSG00000038068 | Rnf144b    | -0.124105758 | 0.190139093 | 0.460235037 |
| ENSMUSG00000047242 | Taf9b      | 0.120999566  | 0.1898707   | 0.460235037 |
| ENSMUSG00000055900 | Tmem69     | -0.122203805 | 0.190067327 | 0.460235037 |
| ENSMUSG00000081113 | Gm7308     | 0.065409285  | 0.190141639 | 0.460235037 |
| ENSMUSG00000106133 | Gm3724     | 0.128071736  | 0.18990615  | 0.460235037 |
| ENSMUSG00000117507 | AC135509.1 | 0.122008492  | 0.190072027 | 0.460235037 |
| ENSMUSG00000027107 | Chrna1     | -0.128848006 | 0.190451337 | 0.460768662 |
| ENSMUSG00000099488 | Gm19774    | 0.125144961  | 0.190487648 | 0.460768662 |
| ENSMUSG00000003731 | Kpna6      | 0.103858344  | 0.190613493 | 0.460983293 |
| ENSMUSG00000058388 | Phtf1      | -0.119995575 | 0.190672025 | 0.461035084 |
| ENSMUSG00000021938 | Pspc1      | 0.123406246  | 0.190709601 | 0.461036191 |
| ENSMUSG00000002949 | Timm44     | 0.12884105   | 0.190910961 | 0.461044824 |
| ENSMUSG00000019809 | Pex3       | 0.121068671  | 0.191075046 | 0.461044824 |
| ENSMUSG00000021235 | Coq6       | 0.114848871  | 0.191157783 | 0.461044824 |
| ENSMUSG00000021696 | Elovl7     | 0.121787818  | 0.190893956 | 0.461044824 |
| ENSMUSG00000022292 | Rrm2b      | -0.128837337 | 0.19115859  | 0.461044824 |
| ENSMUSG00000024007 | Ppil1      | 0.114032913  | 0.191067196 | 0.461044824 |
| ENSMUSG00000029463 | Fam216a    | 0.118195097  | 0.191013155 | 0.461044824 |
| ENSMUSG00000033174 | Mgll       | -0.062143326 | 0.191032234 | 0.461044824 |
| ENSMUSG00000038855 | Itpkb      | 0.099536711  | 0.190942088 | 0.461044824 |
| ENSMUSG00000045193 | Cirbp      | 0.105251448  | 0.191084559 | 0.461044824 |
| ENSMUSG00000073412 | Lst1       | -0.12851672  | 0.191110081 | 0.461044824 |
| ENSMUSG00000082045 | Gm11585    | 0.02324995   | 0.191120083 | 0.461044824 |
| ENSMUSG00000020463 | Ppp4r3b    | -0.126698532 | 0.191398968 | 0.461534961 |
| ENSMUSG00000034116 | Vav1       | -0.117444321 | 0.1914406   | 0.461545747 |
| ENSMUSG00000048490 | Nrip1      | -0.125862587 | 0.191515867 | 0.461637606 |
| ENSMUSG00000024614 | Tmx3       | 0.129045571  | 0.191817548 | 0.46227508  |
| ENSMUSG00000020787 | P2rx1      | -0.108644418 | 0.19193355  | 0.462419816 |
| ENSMUSG00000021537 | Cetn3      | 0.1204821    | 0.191966928 | 0.462419816 |
| ENSMUSG00000050107 | Haspin     | -0.103457511 | 0.191989292 | 0.462419816 |
| ENSMUSG00000032185 | Carm1      | -0.122960164 | 0.192057211 | 0.462493721 |
| ENSMUSG00000021823 | Vcl        | 0.088828825  | 0.192121604 | 0.462541908 |

|                     |           |              |             |             |
|---------------------|-----------|--------------|-------------|-------------|
| ENSMUSG00000043633  | Fam221b   | -0.128138538 | 0.192151698 | 0.462541908 |
| ENSMUSG00000002661  | Alkbh7    | 0.116653309  | 0.192379071 | 0.462999503 |
| ENSMUSG000000031706 | Rfx1      | -0.124070683 | 0.192494364 | 0.463187232 |
| ENSMUSG000000022314 | Rad21     | 0.127755163  | 0.192555996 | 0.463245793 |
| ENSMUSG000000036241 | Ube2r2    | -0.116507762 | 0.192679955 | 0.463277351 |
| ENSMUSG000000069208 | Zfp825    | -0.125890293 | 0.192651713 | 0.463277351 |
| ENSMUSG000000085793 | Lin52     | -0.127958012 | 0.192681008 | 0.463277351 |
| ENSMUSG00000114179  | Eif1-ps2  | 0.086733868  | 0.19276557  | 0.46339097  |
| ENSMUSG000000026321 | Tnfrsf11a | 0.078072015  | 0.192863714 | 0.463537188 |
| ENSMUSG000000028649 | Macf1     | 0.12015163   | 0.193061695 | 0.463923256 |
| ENSMUSG000000041079 | Rwdd2b    | 0.127845674  | 0.193174573 | 0.464104713 |
| ENSMUSG000000042410 | Agps      | 0.127754843  | 0.193414682 | 0.464591717 |
| ENSMUSG000000032624 | Eml4      | -0.116793143 | 0.193567614 | 0.464869167 |
| ENSMUSG000000004895 | Prcc      | -0.126752345 | 0.193620206 | 0.464905582 |
| ENSMUSG000000029672 | Fam3c     | 0.122983278  | 0.19387837  | 0.465345553 |
| ENSMUSG000000037608 | Bclaf1    | 0.122903767  | 0.193843519 | 0.465345553 |
| ENSMUSG000000037351 | Actr1b    | -0.127433875 | 0.194029639 | 0.465618652 |
| ENSMUSG000000024528 | Srfbp1    | 0.11757086   | 0.194144244 | 0.465713721 |
| ENSMUSG00000106562  | Gm5981    | 0.070388853  | 0.19412835  | 0.465713721 |
| ENSMUSG000000055923 | Aasdh     | 0.128092677  | 0.194320097 | 0.466045553 |
| ENSMUSG000000029438 | Bcl7a     | -0.127632977 | 0.19446743  | 0.466308869 |
| ENSMUSG000000074476 | Spc24     | 0.110169767  | 0.194611206 | 0.466563558 |
| ENSMUSG000000005687 | Bcas2     | 0.118180534  | 0.194700735 | 0.466598076 |
| ENSMUSG000000015702 | Anxa9     | 0.128261242  | 0.19467649  | 0.466598076 |
| ENSMUSG000000005410 | Mcm5      | -0.116357268 | 0.194838797 | 0.466748834 |
| ENSMUSG000000020091 | Eif4ebp2  | -0.123997258 | 0.194831705 | 0.466748834 |
| ENSMUSG000000078762 | Haus5     | -0.113865076 | 0.194930018 | 0.466877315 |
| ENSMUSG000000022772 | Senp5     | 0.122929238  | 0.194994493 | 0.466941701 |
| ENSMUSG000000022995 | Enah      | -0.120185979 | 0.195107062 | 0.467121206 |
| ENSMUSG000000041278 | Ttc1      | 0.119550559  | 0.195252606 | 0.467379576 |
| ENSMUSG000000026112 | Coa5      | 0.124778114  | 0.195399299 | 0.467380072 |
| ENSMUSG000000028657 | Ppt1      | -0.099474468 | 0.195452816 | 0.467380072 |
| ENSMUSG000000031200 | Mtcp1     | -0.113404155 | 0.195469579 | 0.467380072 |
| ENSMUSG000000047220 | Ccdc36    | -0.057046082 | 0.195414197 | 0.467380072 |
| ENSMUSG000000047654 | Tssk6     | -0.113484512 | 0.195478583 | 0.467380072 |
| ENSMUSG000000081434 | Gm14165   | 0.07301025   | 0.19535678  | 0.467380072 |
| ENSMUSG000000025369 | Smarcc2   | -0.113701101 | 0.195587678 | 0.467481117 |
| ENSMUSG000000036636 | Clcn7     | -0.119414471 | 0.195596117 | 0.467481117 |
| ENSMUSG000000036932 | Aifm1     | 0.116757479  | 0.195861424 | 0.468025154 |
| ENSMUSG000000056919 | Cep162    | -0.126023179 | 0.196131446 | 0.468580243 |
| ENSMUSG000000024812 | Tjp2      | -0.087428423 | 0.19635604  | 0.46902661  |
| ENSMUSG000000006418 | Rnf114    | -0.106157793 | 0.19657678  | 0.4694636   |
| ENSMUSG000000027236 | Eif3j1    | 0.056810523  | 0.196638281 | 0.469520201 |

|                    |          |              |             |             |
|--------------------|----------|--------------|-------------|-------------|
| ENSMUSG00000113262 | Gm48551  | 0.058153107  | 0.196677287 | 0.469523079 |
| ENSMUSG00000047945 | Marcks1  | 0.116972218  | 0.196831172 | 0.46980015  |
| ENSMUSG00000020319 | Wdpcp    | -0.120103407 | 0.197013122 | 0.470053783 |
| ENSMUSG00000034781 | Gna11    | -0.122353929 | 0.196977929 | 0.470053783 |
| ENSMUSG00000020230 | Prmt2    | -0.101448045 | 0.197202346 | 0.47041489  |
| ENSMUSG00000021748 | Pdhb     | 0.113351138  | 0.197272728 | 0.470492425 |
| ENSMUSG00000042444 | Mindy2   | -0.107846707 | 0.197336761 | 0.470554791 |
| ENSMUSG00000028630 | Dyrk2    | 0.07943289   | 0.197411525 | 0.470642717 |
| ENSMUSG00000057858 | Fam204a  | 0.126532559  | 0.197472251 | 0.470697147 |
| ENSMUSG00000040675 | Mthfd1l  | 0.11048098   | 0.197514984 | 0.470708675 |
| ENSMUSG00000048832 | Vps37c   | -0.125622032 | 0.197581179 | 0.470776104 |
| ENSMUSG00000034235 | Usp54    | 0.080262691  | 0.197626522 | 0.470793829 |
| ENSMUSG00000004319 | Clcn3    | 0.114866521  | 0.197696398 | 0.470869983 |
| ENSMUSG00000020864 | Ankrd40  | -0.125949085 | 0.197792067 | 0.470917245 |
| ENSMUSG00000049323 | Smcr8    | 0.102535993  | 0.197764462 | 0.470917245 |
| ENSMUSG00000006442 | Srm      | 0.111171578  | 0.197948656 | 0.471199743 |
| ENSMUSG00000031813 | Mvb12a   | 0.111420574  | 0.198049103 | 0.471348516 |
| ENSMUSG00000026589 | Sec16b   | -0.093566389 | 0.198291656 | 0.471745002 |
| ENSMUSG00000036845 | Lin37    | -0.12742992  | 0.198277936 | 0.471745002 |
| ENSMUSG00000027078 | Ube2l6   | -0.102262245 | 0.1983739   | 0.47185029  |
| ENSMUSG00000031584 | Gsr      | 0.108144274  | 0.198491901 | 0.471859886 |
| ENSMUSG00000031979 | Cog2     | -0.126016906 | 0.198440706 | 0.471859886 |
| ENSMUSG00000037636 | Slc25a43 | -0.123614692 | 0.198475203 | 0.471859886 |
| ENSMUSG00000026103 | Gls      | 0.126411621  | 0.198541787 | 0.471888163 |
| ENSMUSG00000022550 | Adck5    | -0.124490984 | 0.198660497 | 0.472079977 |
| ENSMUSG00000098232 | Gm3671   | 0.048001405  | 0.198742233 | 0.472183871 |
| ENSMUSG00000038002 | Cramp1l  | -0.114178363 | 0.199055785 | 0.472838384 |
| ENSMUSG00000014905 | Dnajb9   | -0.122366656 | 0.199367113 | 0.473418131 |
| ENSMUSG00000038181 | Chpf2    | -0.101140306 | 0.199376076 | 0.473418131 |
| ENSMUSG00000022019 | Tdrd3    | -0.120775337 | 0.199449623 | 0.473446012 |
| ENSMUSG00000024414 | Mrpl27   | 0.123091789  | 0.199464051 | 0.473446012 |
| ENSMUSG00000025878 | Uimc1    | 0.126374124  | 0.199521048 | 0.473490817 |
| ENSMUSG00000031659 | Adcy7    | -0.12608869  | 0.199569081 | 0.473514337 |
| ENSMUSG00000025474 | Tubgcp2  | -0.124502823 | 0.199712134 | 0.473763258 |
| ENSMUSG00000025192 | Entpd7   | -0.12529062  | 0.199828297 | 0.473948306 |
| ENSMUSG00000024483 | Ankhd1   | 0.105275071  | 0.199964066 | 0.474038533 |
| ENSMUSG00000025785 | Exosc7   | 0.118922212  | 0.199980832 | 0.474038533 |
| ENSMUSG00000032745 | Gppb1    | -0.121559227 | 0.199920422 | 0.474038533 |
| ENSMUSG00000034595 | Ppp1r18  | -0.118322723 | 0.200178544 | 0.474416656 |
| ENSMUSG00000074918 | Inafm2   | -0.121134253 | 0.200245784 | 0.47448548  |
| ENSMUSG00000073684 | Faap20   | -0.11779414  | 0.200383201 | 0.474720531 |
| ENSMUSG00000047030 | Spata2   | -0.123229901 | 0.200504945 | 0.474918369 |
| ENSMUSG00000025915 | Sgk3     | -0.12168213  | 0.200565908 | 0.474972191 |

|                    |               |              |             |             |
|--------------------|---------------|--------------|-------------|-------------|
| ENSMUSG0000002108  | Nr1h3         | 0.097371909  | 0.200876401 | 0.475074086 |
| ENSMUSG00000020573 | Pik3cg        | -0.0952937   | 0.200876668 | 0.475074086 |
| ENSMUSG00000028228 | Cpne3         | 0.063120541  | 0.200818322 | 0.475074086 |
| ENSMUSG00000033618 | Map3k13       | 0.088621848  | 0.200803101 | 0.475074086 |
| ENSMUSG00000047347 | Tdg-ps        | 0.065175509  | 0.200717628 | 0.475074086 |
| ENSMUSG00000053754 | Chd8          | -0.119057158 | 0.200689313 | 0.475074086 |
| ENSMUSG00000072898 | Gm10434       | 0.123383087  | 0.200801561 | 0.475074086 |
| ENSMUSG00000022774 | Ncbp2         | 0.099987877  | 0.201128553 | 0.475579242 |
| ENSMUSG00000021023 | 1110008L16Rik | 0.123807362  | 0.201225992 | 0.47571908  |
| ENSMUSG00000037085 | Trmt12        | -0.110464019 | 0.201282583 | 0.475762316 |
| ENSMUSG00000002458 | Rgs19         | -0.112811186 | 0.201526287 | 0.475976044 |
| ENSMUSG00000026123 | Plekha2       | -0.119895873 | 0.201426398 | 0.475976044 |
| ENSMUSG00000026395 | Ptpnc         | 0.112287835  | 0.20151285  | 0.475976044 |
| ENSMUSG00000044211 | Gm7887        | 0.124466311  | 0.201496425 | 0.475976044 |
| ENSMUSG00000040084 | Bub1b         | -0.123045152 | 0.201585791 | 0.476026067 |
| ENSMUSG00000003131 | Pafah1b2      | 0.125195685  | 0.201719969 | 0.476252373 |
| ENSMUSG00000027715 | Ccna2         | 0.120946749  | 0.201940064 | 0.476681402 |
| ENSMUSG00000031557 | Plekha2       | -0.123422534 | 0.202379917 | 0.477628909 |
| ENSMUSG00000042197 | Zfp451        | -0.124556853 | 0.202453416 | 0.477711603 |
| ENSMUSG00000019433 | Gipc1         | -0.118965384 | 0.202854456 | 0.47856699  |
| ENSMUSG00000021040 | Slirp         | 0.122078995  | 0.202976372 | 0.478710526 |
| ENSMUSG00000036435 | Exoc1         | -0.122175745 | 0.203012067 | 0.478710526 |
| ENSMUSG00000039382 | Wdr45         | -0.124275347 | 0.203030919 | 0.478710526 |
| ENSMUSG00000024442 | Dele1         | -0.123622898 | 0.203102247 | 0.478764849 |
| ENSMUSG00000058402 | Zfp420        | -0.106259629 | 0.203131048 | 0.478764849 |
| ENSMUSG00000026047 | Kdelc1        | -0.10138883  | 0.203171593 | 0.478769562 |
| ENSMUSG00000086316 | Nbpy          | 0.116259652  | 0.203322609 | 0.479034547 |
| ENSMUSG00000028334 | Nans          | 0.110266971  | 0.203435765 | 0.479210249 |
| ENSMUSG00000031023 | Akip1         | 0.116572339  | 0.203508588 | 0.479290892 |
| ENSMUSG00000062300 | Nectin2       | -0.095561014 | 0.203616386 | 0.479453864 |
| ENSMUSG00000022969 | Ii10rb        | -0.124111752 | 0.203663716 | 0.479474414 |
| ENSMUSG00000004897 | Hdgp          | 0.097111142  | 0.203706506 | 0.479484273 |
| ENSMUSG00000021384 | Susd3         | -0.121449453 | 0.203981269 | 0.479494956 |
| ENSMUSG00000034940 | Synrg         | -0.118491066 | 0.203936947 | 0.479494956 |
| ENSMUSG00000038456 | Dennd2a       | -0.085066806 | 0.20375599  | 0.479494956 |
| ENSMUSG00000045225 | Olfr1152      | -0.113199007 | 0.203975454 | 0.479494956 |
| ENSMUSG00000053205 | Styx          | 0.105704508  | 0.203952252 | 0.479494956 |
| ENSMUSG00000069273 | Hist1h3e      | 0.054841667  | 0.203847897 | 0.479494956 |
| ENSMUSG00000109750 | Hmgb1-rs17    | 0.067219546  | 0.203923933 | 0.479494956 |
| ENSMUSG00000025533 | Asl           | -0.124030897 | 0.204129776 | 0.479648559 |
| ENSMUSG00000044377 | Gm13080       | 0.11629703   | 0.204162461 | 0.479648559 |
| ENSMUSG00000079487 | Med12         | 0.101816706  | 0.204129554 | 0.479648559 |
| ENSMUSG00000020886 | Dlg4          | -0.103912987 | 0.204373569 | 0.480053725 |

|                    |               |              |             |             |
|--------------------|---------------|--------------|-------------|-------------|
| ENSMUSG00000074158 | Zfp976        | -0.093655389 | 0.204445573 | 0.48013206  |
| ENSMUSG00000005370 | Msh6          | -0.123799581 | 0.204514514 | 0.480203172 |
| ENSMUSG00000002803 | Btbd6         | -0.103747052 | 0.204763427 | 0.480515119 |
| ENSMUSG00000013611 | Snx31         | 0.07266062   | 0.204748684 | 0.480515119 |
| ENSMUSG00000027363 | Usp8          | -0.105251773 | 0.204743223 | 0.480515119 |
| ENSMUSG00000026930 | Gpsm1         | -0.082387454 | 0.204861844 | 0.480655262 |
| ENSMUSG00000029787 | Avl9          | -0.122447589 | 0.204999516 | 0.48088744  |
| ENSMUSG00000079197 | Psme2         | 0.11302152   | 0.20507291  | 0.480968773 |
| ENSMUSG00000020918 | Kat2a         | -0.121188331 | 0.205362278 | 0.481556515 |
| ENSMUSG00000020284 | 1810043G02Rik | -0.123280337 | 0.205532813 | 0.48179719  |
| ENSMUSG00000028799 | Zfp362        | -0.116402352 | 0.20557678  | 0.48179719  |
| ENSMUSG00000031112 | Stk26         | 0.110914156  | 0.205581282 | 0.48179719  |
| ENSMUSG00000032180 | Tmed1         | 0.113698197  | 0.205964359 | 0.482512884 |
| ENSMUSG00000041187 | Prkd2         | -0.099973946 | 0.205953509 | 0.482512884 |
| ENSMUSG00000030346 | Rad51ap1      | 0.104910119  | 0.206191516 | 0.482953953 |
| ENSMUSG00000060216 | Arhb2         | -0.103519331 | 0.206390822 | 0.483329639 |
| ENSMUSG00000058318 | Phf21a        | 0.114065551  | 0.206678102 | 0.483911161 |
| ENSMUSG00000044117 | 2900011O08Rik | 0.058577461  | 0.20677834  | 0.484025669 |
| ENSMUSG00000061615 | Hist1h2ab     | 0.097802286  | 0.206804945 | 0.484025669 |
| ENSMUSG00000026792 | Lrsam1        | -0.071151279 | 0.206934614 | 0.484188238 |
| ENSMUSG00000084093 | Gm16418       | 0.123625102  | 0.206952367 | 0.484188238 |
| ENSMUSG00000060063 | Alox5ap       | 0.110991417  | 0.207008872 | 0.484198237 |
| ENSMUSG00000066839 | Ecsit         | 0.107415384  | 0.207073588 | 0.484198237 |
| ENSMUSG00000068036 | Afdn          | 0.062511055  | 0.207069442 | 0.484198237 |
| ENSMUSG00000026273 | Mterf4        | 0.119099706  | 0.207142137 | 0.484233294 |
| ENSMUSG00000033237 | Arid2         | 0.106610288  | 0.207166551 | 0.484233294 |
| ENSMUSG00000026657 | Frmd4a        | -0.118580119 | 0.207390749 | 0.48457496  |
| ENSMUSG00000062931 | Zfp938        | -0.122771536 | 0.207390716 | 0.48457496  |
| ENSMUSG00000028447 | Dctn3         | 0.104302914  | 0.207431625 | 0.484579315 |
| ENSMUSG00000041707 | Tmem273       | 0.112844831  | 0.207636059 | 0.484965681 |
| ENSMUSG00000030825 | Hsd17b14      | 0.074798569  | 0.207837323 | 0.485344498 |
| ENSMUSG00000016257 | Prelid3b      | 0.112958732  | 0.207888233 | 0.485372131 |
| ENSMUSG00000030753 | Thap12        | 0.119882678  | 0.207997438 | 0.485535834 |
| ENSMUSG00000005800 | Mmp8          | -0.108867353 | 0.208070516 | 0.4855474   |
| ENSMUSG00000030587 | 2200002D01Rik | 0.047489816  | 0.208080574 | 0.4855474   |
| ENSMUSG00000031097 | Tnni2         | -0.083973668 | 0.208165233 | 0.485653712 |
| ENSMUSG00000015971 | Actr8         | -0.12262518  | 0.208358505 | 0.485799603 |
| ENSMUSG00000022584 | Ly6c2         | -0.133188798 | 0.208305339 | 0.485799603 |
| ENSMUSG00000042737 | Dpm3          | -0.119929619 | 0.208384211 | 0.485799603 |
| ENSMUSG00000083041 | Gmfg-ps       | 0.121614223  | 0.208377292 | 0.485799603 |
| ENSMUSG00000020841 | Cpd           | 0.107605813  | 0.208491572 | 0.485821715 |
| ENSMUSG00000030785 | Cox6a2        | 0.06924061   | 0.208472634 | 0.485821715 |
| ENSMUSG00000045438 | Cox19         | 0.114088786  | 0.208511035 | 0.485821715 |

|                    |               |              |             |             |
|--------------------|---------------|--------------|-------------|-------------|
| ENSMUSG00000038422 | Hdhd3         | -0.106089457 | 0.208713832 | 0.486203021 |
| ENSMUSG00000047368 | Abhd17b       | 0.121087466  | 0.208896702 | 0.486537771 |
| ENSMUSG00000001909 | Trmt1         | 0.115150343  | 0.209211013 | 0.487168988 |
| ENSMUSG00000024034 | Tmprss3       | 0.068464016  | 0.20924616  | 0.487168988 |
| ENSMUSG00000024410 | Rmc1          | -0.104685983 | 0.209549324 | 0.487691991 |
| ENSMUSG00000038116 | Phf20         | 0.11294841   | 0.209511587 | 0.487691991 |
| ENSMUSG00000011658 | Fuz           | -0.122399012 | 0.20962688  | 0.487781094 |
| ENSMUSG00000022177 | Haus4         | 0.099231822  | 0.210014484 | 0.487859967 |
| ENSMUSG00000022521 | Crebbp        | 0.051999382  | 0.209971181 | 0.487859967 |
| ENSMUSG00000026976 | Pax8          | 0.081696915  | 0.209998083 | 0.487859967 |
| ENSMUSG00000032589 | Bsn           | 0.122176547  | 0.209852657 | 0.487859967 |
| ENSMUSG00000036867 | Smad6         | 0.103771396  | 0.210053547 | 0.487859967 |
| ENSMUSG00000045205 | Dpy19l4       | 0.122537657  | 0.209832408 | 0.487859967 |
| ENSMUSG00000045414 | 1190002N15Rik | -0.12247518  | 0.20993214  | 0.487859967 |
| ENSMUSG00000052748 | Swt1          | -0.121814817 | 0.210003655 | 0.487859967 |
| ENSMUSG00000094685 | Gm5900        | -0.122159322 | 0.2100226   | 0.487859967 |
| ENSMUSG00000116030 | Gm49500       | -0.060152885 | 0.209794123 | 0.487859967 |
| ENSMUSG00000027086 | Fastkd1       | 0.119216106  | 0.2102525   | 0.487991459 |
| ENSMUSG00000027379 | Bub1          | -0.105383609 | 0.210224031 | 0.487991459 |
| ENSMUSG00000035206 | Sppl2b        | -0.116884259 | 0.210218767 | 0.487991459 |
| ENSMUSG00000057156 | Homez         | -0.121513119 | 0.210267313 | 0.487991459 |
| ENSMUSG00000035769 | Xylb          | -0.091981089 | 0.210348759 | 0.487998119 |
| ENSMUSG00000078495 | Zfp984        | -0.119861542 | 0.210342139 | 0.487998119 |
| ENSMUSG00000017631 | Abr           | -0.121458024 | 0.210453936 | 0.48805981  |
| ENSMUSG00000055013 | Agap1         | -0.03249614  | 0.2104421   | 0.48805981  |
| ENSMUSG00000021203 | Otub2         | -0.044293053 | 0.210628825 | 0.488374208 |
| ENSMUSG00000050732 | Vamp8         | 0.113992212  | 0.210798703 | 0.488676874 |
| ENSMUSG00000018983 | E2f2          | -0.085011127 | 0.210869728 | 0.488726153 |
| ENSMUSG00000025386 | Pde6g         | -0.112316235 | 0.210898654 | 0.488726153 |
| ENSMUSG00000072968 | Gm17728       | 0.115896407  | 0.211053696 | 0.48894301  |
| ENSMUSG00000111585 | Gm47355       | 0.053657326  | 0.211070962 | 0.48894301  |
| ENSMUSG00000031839 | Hsbp1         | 0.115921502  | 0.211198129 | 0.489099833 |
| ENSMUSG00000043162 | Pyurf         | 0.102874102  | 0.211217414 | 0.489099833 |
| ENSMUSG00000020859 | Spag9         | -0.119128654 | 0.211461761 | 0.489124027 |
| ENSMUSG00000022159 | Rab2b         | -0.111858408 | 0.211399436 | 0.489124027 |
| ENSMUSG00000025935 | Tram1         | -0.099930207 | 0.211363199 | 0.489124027 |
| ENSMUSG00000048379 | Socs4         | 0.122355863  | 0.211306917 | 0.489124027 |
| ENSMUSG00000049734 | Trex1         | -0.121770519 | 0.211464135 | 0.489124027 |
| ENSMUSG00000109658 | Gm45660       | 0.110286586  | 0.211320958 | 0.489124027 |
| ENSMUSG00000006050 | Sra1          | 0.115481759  | 0.211639847 | 0.489257126 |
| ENSMUSG00000026857 | Ntmt1         | 0.119669158  | 0.211628867 | 0.489257126 |
| ENSMUSG00000039958 | Etfbkmt       | 0.095155058  | 0.211611225 | 0.489257126 |
| ENSMUSG00000063800 | Prpf38a       | 0.117124512  | 0.211775256 | 0.489479056 |

|                    |               |              |             |             |
|--------------------|---------------|--------------|-------------|-------------|
| ENSMUSG00000018425 | Dhx40         | -0.121382528 | 0.211856091 | 0.489483725 |
| ENSMUSG00000026097 | Ormdl1        | -0.10661031  | 0.211849019 | 0.489483725 |
| ENSMUSG00000022892 | App           | 0.12272488   | 0.212072691 | 0.489674869 |
| ENSMUSG00000055322 | Tns1          | -0.058087306 | 0.212135937 | 0.489674869 |
| ENSMUSG00000062866 | Phactr2       | -0.121443971 | 0.212111184 | 0.489674869 |
| ENSMUSG00000070942 | Il1rl2        | 0.121660988  | 0.212028074 | 0.489674869 |
| ENSMUSG00000095547 | Gm10719       | -0.049144554 | 0.212057745 | 0.489674869 |
| ENSMUSG00000040061 | Plcb2         | -0.108495848 | 0.212190916 | 0.489710771 |
| ENSMUSG00000094153 | Gm8807        | 0.057457426  | 0.212313713 | 0.489903145 |
| ENSMUSG00000025169 | Ogfod3        | -0.120605865 | 0.21243513  | 0.490092264 |
| ENSMUSG00000036572 | Upf3b         | 0.10779205   | 0.212516564 | 0.490189088 |
| ENSMUSG00000059791 | Nrm           | -0.100727066 | 0.212675848 | 0.490465412 |
| ENSMUSG00000023353 | Agap3         | -0.120848386 | 0.21280978  | 0.490683178 |
| ENSMUSG00000022952 | Runx1         | -0.124216106 | 0.212937928 | 0.49088753  |
| ENSMUSG00000022329 | Stk3          | -0.120462407 | 0.213118079 | 0.491211664 |
| ENSMUSG00000017615 | Tnfaip1       | -0.116425757 | 0.21323978  | 0.491218715 |
| ENSMUSG00000021171 | Esyt2         | -0.117359997 | 0.213239576 | 0.491218715 |
| ENSMUSG00000034390 | Cmip          | -0.120507508 | 0.213192858 | 0.491218715 |
| ENSMUSG00000008305 | Tle1          | 0.118932237  | 0.213374401 | 0.491272716 |
| ENSMUSG00000038388 | Mpp6          | 0.117270339  | 0.213381878 | 0.491272716 |
| ENSMUSG00000090124 | Ugt1a7c       | -0.120073313 | 0.213370102 | 0.491272716 |
| ENSMUSG00000003541 | Ier3          | 0.107127523  | 0.213575894 | 0.491470848 |
| ENSMUSG00000030374 | Strn4         | -0.099082253 | 0.213586638 | 0.491470848 |
| ENSMUSG00000041130 | Zfp598        | -0.106723847 | 0.213563288 | 0.491470848 |
| ENSMUSG00000023087 | Noct          | 0.113989942  | 0.2136533   | 0.491533179 |
| ENSMUSG00000020829 | Slc46a1       | 0.120670954  | 0.213797646 | 0.491774177 |
| ENSMUSG00000020689 | Itgb3         | -0.08338116  | 0.213861541 | 0.49183007  |
| ENSMUSG00000033396 | Spg11         | -0.113314166 | 0.213939454 | 0.49191817  |
| ENSMUSG00000023755 | Rhebl1        | -0.116720694 | 0.214375793 | 0.492750884 |
| ENSMUSG00000026933 | Camsap1       | -0.092678129 | 0.214420621 | 0.492750884 |
| ENSMUSG00000052459 | Atp6v1a       | 0.1184836    | 0.214389112 | 0.492750884 |
| ENSMUSG00000091071 | 1700030C10Rik | 0.022942497  | 0.214482381 | 0.492801639 |
| ENSMUSG00000028617 | Lrrc42        | 0.113123145  | 0.214589566 | 0.492956722 |
| ENSMUSG00000001604 | Tcea3         | -0.055952797 | 0.214808356 | 0.49310256  |
| ENSMUSG00000021728 | Emb           | 0.10102689   | 0.214745993 | 0.49310256  |
| ENSMUSG00000024538 | Ppic          | 0.119900183  | 0.214801406 | 0.49310256  |
| ENSMUSG00000071470 | Ccnb1ip1      | 0.100190474  | 0.214811847 | 0.49310256  |
| ENSMUSG00000025579 | Gaa           | -0.112440479 | 0.214942849 | 0.493312109 |
| ENSMUSG00000022999 | Lmbr1l        | -0.086726163 | 0.214984429 | 0.493316385 |
| ENSMUSG00000039713 | Plekhg5       | -0.047809203 | 0.215066761 | 0.493414157 |
| ENSMUSG00000001761 | Smo           | -0.11631331  | 0.215199682 | 0.493476198 |
| ENSMUSG00000021972 | Hmbox1        | -0.109857111 | 0.215371908 | 0.493476198 |
| ENSMUSG00000026029 | Casp8         | -0.107555874 | 0.215328952 | 0.493476198 |

|                    |            |              |             |             |
|--------------------|------------|--------------|-------------|-------------|
| ENSMUSG00000026162 | Nhej1      | 0.099184587  | 0.215237806 | 0.493476198 |
| ENSMUSG00000028914 | Casp9      | 0.117782967  | 0.215171101 | 0.493476198 |
| ENSMUSG00000035559 | Mpv17l2    | 0.116895706  | 0.215345969 | 0.493476198 |
| ENSMUSG00000042210 | Abhd14a    | 0.106356594  | 0.21530651  | 0.493476198 |
| ENSMUSG00000005813 | Metap1     | 0.119160872  | 0.215846901 | 0.493674648 |
| ENSMUSG00000025217 | Btrc       | -0.120282068 | 0.215855971 | 0.493674648 |
| ENSMUSG00000030400 | Ercc2      | -0.063107808 | 0.215671827 | 0.493674648 |
| ENSMUSG00000034928 | Rnf44      | -0.094774132 | 0.215800186 | 0.493674648 |
| ENSMUSG00000036372 | Tmem258    | 0.106413194  | 0.215592174 | 0.493674648 |
| ENSMUSG00000036918 | Ttc7       | -0.101513774 | 0.215799921 | 0.493674648 |
| ENSMUSG00000056708 | Ier5       | 0.096722936  | 0.215789089 | 0.493674648 |
| ENSMUSG00000072964 | Bhlhb9     | -0.120270957 | 0.215550551 | 0.493674648 |
| ENSMUSG00000073856 | Iqck       | -0.067706232 | 0.215656322 | 0.493674648 |
| ENSMUSG00000091471 | Gm20538    | 0.119186499  | 0.215799969 | 0.493674648 |
| ENSMUSG00000007880 | Arid1a     | 0.105650169  | 0.215954709 | 0.493718654 |
| ENSMUSG00000103880 | Gm37009    | 0.077757206  | 0.215925104 | 0.493718654 |
| ENSMUSG00000027475 | Kif3b      | 0.095664148  | 0.216098089 | 0.493955533 |
| ENSMUSG00000017561 | Crlf3      | -0.11405862  | 0.216312513 | 0.494354686 |
| ENSMUSG00000030200 | Bcl2l14    | -0.096767393 | 0.216482156 | 0.494651373 |
| ENSMUSG00000022565 | Plec       | -0.11770138  | 0.216803708 | 0.495112105 |
| ENSMUSG00000024513 | Mbd2       | -0.119139299 | 0.216842733 | 0.495112105 |
| ENSMUSG00000061436 | Hipk2      | -0.117825459 | 0.216843237 | 0.495112105 |
| ENSMUSG00000090334 | Gm17149    | 0.090512158  | 0.216778057 | 0.495112105 |
| ENSMUSG00000025078 | Nhlrc2     | -0.109147878 | 0.217072541 | 0.495543158 |
| ENSMUSG00000027474 | Ccm2l      | 0.094856109  | 0.217111816 | 0.495543158 |
| ENSMUSG00000024491 | Rbm27      | 0.119490568  | 0.217320726 | 0.495837756 |
| ENSMUSG00000078435 | AU041133   | -0.110922911 | 0.217304421 | 0.495837756 |
| ENSMUSG00000026399 | Cd55       | -0.068550237 | 0.217503828 | 0.496073273 |
| ENSMUSG00000063954 | Hist2h2aa2 | -0.106793596 | 0.217481898 | 0.496073273 |
| ENSMUSG00000030539 | Sema4b     | -0.069953262 | 0.217610042 | 0.496133321 |
| ENSMUSG00000074305 | Peak1      | -0.082740504 | 0.217608546 | 0.496133321 |
| ENSMUSG00000023932 | Cdc5l      | 0.114053754  | 0.218057184 | 0.496918535 |
| ENSMUSG00000024816 | Frmd8      | -0.119067104 | 0.218122288 | 0.496918535 |
| ENSMUSG00000031631 | Cfap97     | -0.114995694 | 0.218190071 | 0.496918535 |
| ENSMUSG00000032299 | Commd4     | -0.118170421 | 0.218287922 | 0.496918535 |
| ENSMUSG00000038604 | Ripor1     | -0.119178639 | 0.218180009 | 0.496918535 |
| ENSMUSG00000040430 | Pitpnc1    | -0.11937961  | 0.218313594 | 0.496918535 |
| ENSMUSG00000041598 | Cdc42ep4   | -0.104934368 | 0.218086894 | 0.496918535 |
| ENSMUSG00000049305 | Ccdc71     | -0.113015736 | 0.2182245   | 0.496918535 |
| ENSMUSG00000060860 | Ube2s      | -0.106581954 | 0.218314503 | 0.496918535 |
| ENSMUSG00000036461 | Elf1       | 0.11940128   | 0.218430379 | 0.497012152 |
| ENSMUSG00000062797 | Hikeshi    | 0.104682994  | 0.218435661 | 0.497012152 |
| ENSMUSG00000059713 | Rcan3      | -0.099885002 | 0.218487884 | 0.497039927 |

|                    |           |              |             |             |
|--------------------|-----------|--------------|-------------|-------------|
| ENSMUSG00000038172 | Ttc39b    | 0.05820565   | 0.218593917 | 0.497190083 |
| ENSMUSG00000022558 | Mroh1     | 0.11107259   | 0.218886084 | 0.497250162 |
| ENSMUSG00000034793 | G6pc3     | 0.099734505  | 0.218715489 | 0.497250162 |
| ENSMUSG00000042558 | Adprhl2   | -0.099101016 | 0.218900562 | 0.497250162 |
| ENSMUSG00000046201 | Scaf8     | -0.116731892 | 0.218776727 | 0.497250162 |
| ENSMUSG00000051319 | Mtln      | 0.101126788  | 0.218854557 | 0.497250162 |
| ENSMUSG00000068290 | Ddrgk1    | 0.097096055  | 0.218836399 | 0.497250162 |
| ENSMUSG00000095930 | Nim1k     | 0.108256574  | 0.218768798 | 0.497250162 |
| ENSMUSG00000034171 | Faah      | -0.069041332 | 0.219033006 | 0.497460041 |
| ENSMUSG00000031828 | Klhl36    | -0.112733402 | 0.219235885 | 0.497829785 |
| ENSMUSG00000020283 | Pex13     | -0.114919537 | 0.219448445 | 0.497857375 |
| ENSMUSG00000037174 | Elf2      | 0.11948725   | 0.219295593 | 0.497857375 |
| ENSMUSG00000056342 | Usp34     | 0.086644825  | 0.219437746 | 0.497857375 |
| ENSMUSG00000057406 | Nsd2      | 0.109696604  | 0.219352022 | 0.497857375 |
| ENSMUSG00000106831 | Ube2n-ps1 | 0.10980632   | 0.21937743  | 0.497857375 |
| ENSMUSG00000028902 | Sf3a3     | 0.104321864  | 0.21950659  | 0.497857603 |
| ENSMUSG00000038582 | Pptc7     | 0.110911944  | 0.219528709 | 0.497857603 |
| ENSMUSG00000000275 | Trim25    | -0.119287203 | 0.219581213 | 0.49788577  |
| ENSMUSG00000024190 | Dusp1     | -0.105974321 | 0.219647594 | 0.497945385 |
| ENSMUSG00000047656 | Trpt1     | -0.071756329 | 0.219768081 | 0.498127615 |
| ENSMUSG00000002064 | Sdf2      | -0.10800477  | 0.219954559 | 0.49817261  |
| ENSMUSG00000021771 | Vdac2     | 0.114131192  | 0.220170603 | 0.49817261  |
| ENSMUSG00000024544 | Ldlrad4   | -0.103039706 | 0.220235547 | 0.49817261  |
| ENSMUSG00000027540 | Ptpn1     | 0.116051851  | 0.22026922  | 0.49817261  |
| ENSMUSG00000027573 | Gid8      | -0.117689617 | 0.219873218 | 0.49817261  |
| ENSMUSG00000029775 | Klhdc10   | -0.118280597 | 0.219868329 | 0.49817261  |
| ENSMUSG00000030536 | Iqgap1    | -0.117158879 | 0.219924307 | 0.49817261  |
| ENSMUSG00000041308 | Sntb2     | -0.118908498 | 0.220037502 | 0.49817261  |
| ENSMUSG00000048188 | Gm8181    | -0.092397586 | 0.220250206 | 0.49817261  |
| ENSMUSG00000048772 | Tmem53    | 0.119447232  | 0.220184936 | 0.49817261  |
| ENSMUSG00000062991 | Nrg1      | 0.117640277  | 0.220063034 | 0.49817261  |
| ENSMUSG00000115886 | Tgtp2     | -0.052408736 | 0.220187878 | 0.49817261  |
| ENSMUSG00000067150 | Xpo5      | 0.096681248  | 0.220331899 | 0.498223651 |
| ENSMUSG00000015202 | Cnksr3    | -0.104298679 | 0.220458962 | 0.498420235 |
| ENSMUSG00000019039 | Dalrd3    | -0.118991984 | 0.220887569 | 0.499210694 |
| ENSMUSG00000078768 | Zfp566    | -0.112799002 | 0.220888976 | 0.499210694 |
| ENSMUSG00000028344 | Invs      | -0.101195598 | 0.220962296 | 0.499285551 |
| ENSMUSG00000020894 | Vamp2     | -0.107763656 | 0.22107648  | 0.499429665 |
| ENSMUSG00000089824 | Rbm12     | 0.092947575  | 0.221106491 | 0.499429665 |
| ENSMUSG00000027636 | Sla2      | -0.097684822 | 0.221190995 | 0.499529699 |
| ENSMUSG00000016319 | Slc25a5   | 0.116950345  | 0.221254938 | 0.499583272 |
| ENSMUSG00000017264 | Exosc10   | -0.114577748 | 0.221412998 | 0.499667668 |
| ENSMUSG00000042275 | Pelo      | -0.110044733 | 0.221390412 | 0.499667668 |

|                    |               |              |             |             |
|--------------------|---------------|--------------|-------------|-------------|
| ENSMUSG00000069792 | Wfdc17        | 0.097401846  | 0.22134046  | 0.499667668 |
| ENSMUSG00000030407 | Qpctl         | -0.118597806 | 0.22146809  | 0.499701207 |
| ENSMUSG00000049539 | Hist1h1a      | 0.070235559  | 0.221594232 | 0.49987433  |
| ENSMUSG00000078684 | 5830417110Rik | -0.117925766 | 0.221625307 | 0.49987433  |
| ENSMUSG00000023764 | Sfi1          | -0.117323495 | 0.221700463 | 0.499927668 |
| ENSMUSG00000057667 | Bloc1s3       | -0.116111081 | 0.221769701 | 0.499927668 |
| ENSMUSG00000074344 | Tmigd3        | -0.086266966 | 0.221761153 | 0.499927668 |
| ENSMUSG00000023051 | Tarbp2        | 0.107425429  | 0.222008926 | 0.500179386 |
| ENSMUSG00000029322 | Plac8         | 0.107590127  | 0.222042439 | 0.500179386 |
| ENSMUSG00000035521 | Gnptg         | 0.10514014   | 0.22196455  | 0.500179386 |
| ENSMUSG00000055553 | Kxd1          | 0.117220595  | 0.221926782 | 0.500179386 |
| ENSMUSG00000052212 | Cd177         | 0.115148566  | 0.222101491 | 0.50022169  |
| ENSMUSG00000024983 | Vti1a         | 0.106482121  | 0.222154961 | 0.500251408 |
| ENSMUSG00000031985 | Gnpat         | -0.095904968 | 0.222203003 | 0.500268896 |
| ENSMUSG00000039187 | Fanci         | -0.115838626 | 0.222263397 | 0.500314181 |
| ENSMUSG00000002881 | Nab1          | -0.11634409  | 0.222402116 | 0.500354407 |
| ENSMUSG00000042744 | Hectd4        | -0.10460878  | 0.222378664 | 0.500354407 |
| ENSMUSG00000098557 | Kctd12        | 0.104756061  | 0.222334743 | 0.500354407 |
| ENSMUSG00000024232 | Bambi         | 0.107536718  | 0.222540857 | 0.500370085 |
| ENSMUSG00000041126 | H2afv         | -0.114721734 | 0.222514015 | 0.500370085 |
| ENSMUSG00000057219 | Armc7         | -0.117880123 | 0.222589796 | 0.500370085 |
| ENSMUSG00000082319 | Gm8822        | 0.056549766  | 0.222610506 | 0.500370085 |
| ENSMUSG00000082424 | Gm13292       | 0.036234092  | 0.222576083 | 0.500370085 |
| ENSMUSG00000078240 | Gm3550        | -0.080598678 | 0.222662125 | 0.500395559 |
| ENSMUSG00000069237 | Fam8a1        | -0.083757099 | 0.222768674 | 0.500544446 |
| ENSMUSG00000024963 | Dnajc4        | -0.113245696 | 0.2228223   | 0.500574386 |
| ENSMUSG00000015942 | Gtf2ird2      | -0.107836132 | 0.222881107 | 0.500615954 |
| ENSMUSG00000025616 | Usp16         | 0.116967919  | 0.223030424 | 0.500770228 |
| ENSMUSG00000038520 | Tbc1d17       | -0.115395683 | 0.223003118 | 0.500770228 |
| ENSMUSG00000042211 | Fbxo38        | -0.109716475 | 0.223189307 | 0.501036396 |
| ENSMUSG00000029869 | Ephb6         | -0.040375316 | 0.223232489 | 0.50104278  |
| ENSMUSG00000020546 | Stxbp4        | -0.103678124 | 0.223512051 | 0.501489014 |
| ENSMUSG00000057497 | Fam136a       | 0.116928902  | 0.223497337 | 0.501489014 |
| ENSMUSG00000004637 | Wwox          | -0.11625518  | 0.223674136 | 0.501684838 |
| ENSMUSG00000027994 | Mcub          | 0.113039123  | 0.223680109 | 0.501684838 |
| ENSMUSG00000020189 | Osbpl8        | 0.118594814  | 0.223726747 | 0.50169885  |
| ENSMUSG00000035575 | Utp6          | 0.110661695  | 0.22381351  | 0.501802817 |
| ENSMUSG00000048497 | Mmgt2         | -0.117721056 | 0.224006582 | 0.502054448 |
| ENSMUSG00000061607 | Mdc1          | 0.081675311  | 0.223991894 | 0.502054448 |
| ENSMUSG00000020064 | Herc4         | 0.116346797  | 0.224090917 | 0.502062279 |
| ENSMUSG00000051154 | Commd3        | 0.092861843  | 0.224055049 | 0.502062279 |
| ENSMUSG00000031431 | Tsc22d3       | -0.117179109 | 0.224228268 | 0.502279407 |
| ENSMUSG00000025940 | Tmem70        | 0.10364005   | 0.224297313 | 0.502343476 |

|                    |          |              |             |             |
|--------------------|----------|--------------|-------------|-------------|
| ENSMUSG00000021144 | Mta1     | -0.099901686 | 0.224641801 | 0.502571292 |
| ENSMUSG00000021816 | Ppp3cb   | -0.113432933 | 0.22462746  | 0.502571292 |
| ENSMUSG00000028114 | Mettl14  | -0.105719774 | 0.224556241 | 0.502571292 |
| ENSMUSG00000032035 | Ets1     | 0.111381002  | 0.22448823  | 0.502571292 |
| ENSMUSG00000059409 | Ppp2r5d  | -0.107185695 | 0.22460273  | 0.502571292 |
| ENSMUSG00000085666 | Gm9855   | -0.032883803 | 0.224640666 | 0.502571292 |
| ENSMUSG00000033004 | Mycbp2   | 0.117534447  | 0.224689952 | 0.502588492 |
| ENSMUSG00000004415 | Col26a1  | -0.026183264 | 0.224809945 | 0.502675846 |
| ENSMUSG00000015750 | Aph1a    | 0.116959876  | 0.224775275 | 0.502675846 |
| ENSMUSG00000029389 | Ddx55    | 0.108040525  | 0.224923764 | 0.502749337 |
| ENSMUSG00000035284 | Vps13c   | 0.102642827  | 0.224903088 | 0.502749337 |
| ENSMUSG00000031109 | Enox2    | -0.116022918 | 0.225172281 | 0.503033255 |
| ENSMUSG00000036106 | Prr5     | -0.116037239 | 0.225171842 | 0.503033255 |
| ENSMUSG00000041203 | Trir     | 0.099706555  | 0.225127369 | 0.503033255 |
| ENSMUSG00000022419 | Deptor   | -0.115209767 | 0.225381119 | 0.503409257 |
| ENSMUSG00000028416 | Bag1     | 0.114212571  | 0.225450938 | 0.503474667 |
| ENSMUSG00000090812 | Samd15   | -0.117953557 | 0.225524235 | 0.503547821 |
| ENSMUSG00000046822 | Slc39a3  | -0.117203615 | 0.225582314 | 0.503586974 |
| ENSMUSG00000104360 | Gm8762   | 0.060749304  | 0.225623924 | 0.503589354 |
| ENSMUSG00000066880 | Zfp617   | -0.109308514 | 0.225699899 | 0.503620826 |
| ENSMUSG00000097388 | Gm3200   | 0.06097485   | 0.225719116 | 0.503620826 |
| ENSMUSG00000022710 | Usp7     | 0.117744499  | 0.225841223 | 0.503748287 |
| ENSMUSG00000051502 | Ufsp1    | 0.085155425  | 0.225857355 | 0.503748287 |
| ENSMUSG00000035666 | Gtf3c4   | -0.113552343 | 0.226147304 | 0.504123414 |
| ENSMUSG00000036599 | Chst12   | -0.098903116 | 0.226078324 | 0.504123414 |
| ENSMUSG00000042138 | Msantd2  | -0.110093104 | 0.226109972 | 0.504123414 |
| ENSMUSG00000041870 | Ankrd13a | -0.119871235 | 0.226268385 | 0.50430282  |
| ENSMUSG00000020227 | Irak3    | -0.116361382 | 0.226357648 | 0.504411257 |
| ENSMUSG00000054814 | Usp46    | 0.07336732   | 0.226426525 | 0.504411923 |
| ENSMUSG00000108844 | Gm6702   | 0.093122574  | 0.226439166 | 0.504411923 |
| ENSMUSG00000035711 | Dok3     | -0.113174066 | 0.226517343 | 0.504495591 |
| ENSMUSG00000025439 | Clns1a   | 0.097864265  | 0.226576678 | 0.504526631 |
| ENSMUSG00000111817 | Gm47154  | 0.117120822  | 0.226612517 | 0.504526631 |
| ENSMUSG00000021843 | Ktn1     | 0.111082506  | 0.226661984 | 0.504546327 |
| ENSMUSG00000004936 | Map2k1   | -0.092750642 | 0.226771489 | 0.504676491 |
| ENSMUSG00000034211 | Mrps17   | 0.086571566  | 0.226919126 | 0.504676491 |
| ENSMUSG00000036894 | Rap2b    | 0.110345122  | 0.226950771 | 0.504676491 |
| ENSMUSG00000038332 | Sesn1    | -0.055769192 | 0.226964244 | 0.504676491 |
| ENSMUSG00000039599 | Fam149b  | -0.113465344 | 0.226842978 | 0.504676491 |
| ENSMUSG00000060798 | Intu     | 0.102468599  | 0.22687517  | 0.504676491 |
| ENSMUSG00000018474 | Chd3     | -0.106624297 | 0.227059038 | 0.504692388 |
| ENSMUSG00000030880 | Polr3e   | -0.108667533 | 0.227073603 | 0.504692388 |
| ENSMUSG00000071662 | Polr2g   | 0.109436454  | 0.22709329  | 0.504692388 |

|                    |            |              |             |             |
|--------------------|------------|--------------|-------------|-------------|
| ENSMUSG00000112341 | Gm4796     | 0.059117656  | 0.227423093 | 0.505334926 |
| ENSMUSG00000109724 | Gm18194    | 0.115121119  | 0.227567962 | 0.505566384 |
| ENSMUSG00000038500 | Prr3       | -0.116607894 | 0.227652298 | 0.505572894 |
| ENSMUSG00000075271 | Ttc30a1    | -0.104887025 | 0.227650828 | 0.505572894 |
| ENSMUSG00000029596 | Sdsl       | -0.103370768 | 0.227868885 | 0.50596343  |
| ENSMUSG00000032508 | Myd88      | 0.104943905  | 0.228131186 | 0.506274337 |
| ENSMUSG00000033653 | Vps8       | -0.092421458 | 0.228131043 | 0.506274337 |
| ENSMUSG00000097530 | Kansl2-ps  | -0.105990171 | 0.228106303 | 0.506274337 |
| ENSMUSG00000039087 | Rreb1      | 0.105752061  | 0.228182949 | 0.50629875  |
| ENSMUSG00000079215 | Zfp664     | 0.109325847  | 0.22822997  | 0.506312638 |
| ENSMUSG00000117526 | AC113953.1 | 0.035738815  | 0.228276656 | 0.506325775 |
| ENSMUSG00000028330 | Ncbp1      | 0.116152225  | 0.228411159 | 0.506533656 |
| ENSMUSG00000021234 | Fam161b    | -0.083778095 | 0.228701664 | 0.507087355 |
| ENSMUSG00000034889 | Cactin     | -0.103965572 | 0.228914149 | 0.507467901 |
| ENSMUSG00000050530 | Fam171a1   | -0.072889914 | 0.228969897 | 0.507500909 |
| ENSMUSG00000020687 | Cdc27      | 0.116471883  | 0.229151744 | 0.507649598 |
| ENSMUSG00000036225 | Kctd1      | 0.115951178  | 0.229159592 | 0.507649598 |
| ENSMUSG00000037070 | Rbmxl1     | 0.101272261  | 0.229115247 | 0.507649598 |
| ENSMUSG00000026159 | Agfg1      | -0.111071484 | 0.229353827 | 0.507988522 |
| ENSMUSG00000041035 | Gm17018    | 0.10423528   | 0.229394382 | 0.507988522 |
| ENSMUSG00000038605 | Samd10     | -0.115679539 | 0.229475612 | 0.508077822 |
| ENSMUSG00000026679 | Enkur      | 0.078631051  | 0.229562098 | 0.508178724 |
| ENSMUSG00000025736 | Jmjd8      | -0.113146205 | 0.229611392 | 0.508197274 |
| ENSMUSG00000057411 | Fam173a    | 0.08778238   | 0.22974419  | 0.508400603 |
| ENSMUSG00000056055 | Sag        | 0.113557271  | 0.230236598 | 0.509399498 |
| ENSMUSG00000028293 | Slc35a1    | -0.107024855 | 0.230332015 | 0.50951985  |
| ENSMUSG00000045827 | Serpinb9   | 0.095125408  | 0.230560069 | 0.50984273  |
| ENSMUSG00000055401 | Fbxo6      | -0.113478868 | 0.230535481 | 0.50984273  |
| ENSMUSG00000019792 | Trmt11     | 0.114950736  | 0.230761795 | 0.510197981 |
| ENSMUSG00000026095 | Asnsd1     | 0.104951962  | 0.23102589  | 0.510444071 |
| ENSMUSG00000029313 | Aff1       | -0.116619758 | 0.231037482 | 0.510444071 |
| ENSMUSG00000036168 | Ccdc38     | 0.077097562  | 0.230957743 | 0.510444071 |
| ENSMUSG00000078695 | Cisd3      | 0.112698443  | 0.230924626 | 0.510444071 |
| ENSMUSG00000021182 | Ccdc88c    | -0.10426874  | 0.231513824 | 0.511405515 |
| ENSMUSG00000022026 | Olfm4      | -0.045359473 | 0.231725009 | 0.511746681 |
| ENSMUSG00000022141 | Nipbl      | 0.110300442  | 0.23178427  | 0.511746681 |
| ENSMUSG00000031310 | Zmym3      | -0.115265543 | 0.231791871 | 0.511746681 |
| ENSMUSG00000001739 | Cldn15     | 0.11335869   | 0.23197276  | 0.512031247 |
| ENSMUSG00000029397 | Rchy1      | -0.121067117 | 0.232003209 | 0.512031247 |
| ENSMUSG00000079084 | Ccdc82     | -0.109492203 | 0.232078772 | 0.512107021 |
| ENSMUSG00000109129 | Gm44973    | 0.099317197  | 0.232126268 | 0.512120848 |
| ENSMUSG00000030680 | Pagr1a     | -0.108686448 | 0.232270976 | 0.512167191 |
| ENSMUSG00000036208 | Nepro      | 0.106158359  | 0.23220327  | 0.512167191 |

|                    |            |              |             |             |
|--------------------|------------|--------------|-------------|-------------|
| ENSMUSG00000050533 | Gm9845     | -0.076100641 | 0.232263153 | 0.512167191 |
| ENSMUSG00000029439 | Sfswap     | 0.112491038  | 0.232380967 | 0.512318778 |
| ENSMUSG00000006476 | Nsmf       | -0.096042867 | 0.232612576 | 0.51264741  |
| ENSMUSG00000026150 | Mff        | 0.094522896  | 0.232612301 | 0.51264741  |
| ENSMUSG00000018395 | Kif3a      | 0.115104207  | 0.232733473 | 0.512731904 |
| ENSMUSG00000026187 | Xrcc5      | 0.109344606  | 0.232710345 | 0.512731904 |
| ENSMUSG00000006782 | Cnp        | -0.114568562 | 0.232775409 | 0.512733348 |
| ENSMUSG00000043346 | Gm6741     | 0.111435259  | 0.232897248 | 0.512910766 |
| ENSMUSG00000070691 | Runx3      | -0.044280142 | 0.232939222 | 0.512912264 |
| ENSMUSG00000009350 | Mpo        | -0.114413034 | 0.233334402 | 0.513423408 |
| ENSMUSG00000020607 | Fam84a     | -0.076751959 | 0.233271491 | 0.513423408 |
| ENSMUSG00000038252 | Ncapd2     | 0.115345265  | 0.233286108 | 0.513423408 |
| ENSMUSG00000048578 | Mlec       | 0.103938342  | 0.233336699 | 0.513423408 |
| ENSMUSG00000029185 | Fam114a1   | -0.099352221 | 0.233455884 | 0.513594676 |
| ENSMUSG00000097295 | Hmgb1-ps8  | 0.080599356  | 0.233703924 | 0.514049308 |
| ENSMUSG00000101249 | Gm29216    | -0.112926595 | 0.233790531 | 0.514148757 |
| ENSMUSG00000028986 | Klhl7      | -0.11492642  | 0.23386179  | 0.514214426 |
| ENSMUSG00000027559 | Car3       | -0.099268434 | 0.234087885 | 0.514531109 |
| ENSMUSG00000045665 | Mfsd5      | -0.108606774 | 0.234088664 | 0.514531109 |
| ENSMUSG00000019842 | Traf3ip2   | -0.096071899 | 0.234475848 | 0.515127736 |
| ENSMUSG00000037022 | Mmaa       | -0.114878669 | 0.234478501 | 0.515127736 |
| ENSMUSG00000047909 | Ankrd16    | -0.1101222   | 0.234525992 | 0.515127736 |
| ENSMUSG00000073639 | Rab18      | 0.114259315  | 0.23448957  | 0.515127736 |
| ENSMUSG00000048799 | Cep120     | -0.112223967 | 0.234708174 | 0.515436745 |
| ENSMUSG00000033623 | Pcgf3      | 0.093066194  | 0.235161588 | 0.516341185 |
| ENSMUSG00000042340 | Ctf1       | 0.063918083  | 0.235224161 | 0.516387293 |
| ENSMUSG00000045780 | Olfr624    | 0.114990615  | 0.235268944 | 0.516394336 |
| ENSMUSG00000017707 | Serinc3    | -0.105120608 | 0.235405766 | 0.516603361 |
| ENSMUSG00000010608 | Rbm25      | 0.110280864  | 0.235593246 | 0.51667592  |
| ENSMUSG00000019362 | D8Ertd738e | 0.105838459  | 0.235761888 | 0.51667592  |
| ENSMUSG00000019823 | Mical1     | -0.113760356 | 0.235813203 | 0.51667592  |
| ENSMUSG00000021676 | Iqgap2     | 0.11450374   | 0.235809216 | 0.51667592  |
| ENSMUSG00000028559 | Osbpl9     | -0.114093876 | 0.235664207 | 0.51667592  |
| ENSMUSG00000031198 | Fundc2     | 0.114315512  | 0.235511893 | 0.51667592  |
| ENSMUSG00000034799 | Unc13a     | 0.088313703  | 0.235749677 | 0.51667592  |
| ENSMUSG00000038302 | Afg1l      | -0.089328206 | 0.235684323 | 0.51667592  |
| ENSMUSG00000091811 | Inafm1     | -0.098860125 | 0.235597474 | 0.51667592  |
| ENSMUSG00000036315 | Znrd1      | 0.093387241  | 0.235909228 | 0.516704023 |
| ENSMUSG00000096910 | Zfp955b    | -0.095803568 | 0.235877542 | 0.516704023 |
| ENSMUSG00000004270 | Lpcat3     | 0.098673677  | 0.236023418 | 0.516735318 |
| ENSMUSG00000058076 | Sdhc       | 0.114320871  | 0.236015172 | 0.516735318 |
| ENSMUSG00000058385 | Hist1h2bg  | -0.053016325 | 0.236048321 | 0.516735318 |
| ENSMUSG00000028633 | Ctps       | 0.113459244  | 0.236093654 | 0.516743484 |

|                    |         |              |             |             |
|--------------------|---------|--------------|-------------|-------------|
| ENSMUSG00000022856 | Tmem41a | 0.106231127  | 0.23616231  | 0.516802687 |
| ENSMUSG00000051695 | Pcbp1   | -0.11937772  | 0.236231535 | 0.516863115 |
| ENSMUSG00000057103 | Nat8f1  | -0.100265516 | 0.236375298 | 0.517086575 |
| ENSMUSG00000042121 | Ssh1    | -0.057536899 | 0.236425769 | 0.517105911 |
| ENSMUSG00000025402 | Nab2    | 0.045081133  | 0.236622414 | 0.517444896 |
| ENSMUSG00000001020 | S100a4  | -0.086763612 | 0.236739761 | 0.517610381 |
| ENSMUSG00000042063 | Zfp386  | -0.107886764 | 0.237072836 | 0.518065042 |
| ENSMUSG00000045969 | Ing1    | -0.102683022 | 0.237055333 | 0.518065042 |
| ENSMUSG00000057069 | Ero1lb  | -0.10009464  | 0.23699281  | 0.518065042 |
| ENSMUSG00000001376 | Vps50   | 0.114201572  | 0.237290146 | 0.518448707 |
| ENSMUSG00000019505 | Ubb     | -0.111051006 | 0.237464844 | 0.518649126 |
| ENSMUSG00000061838 | Suclg2  | 0.093446701  | 0.237507144 | 0.518649126 |
| ENSMUSG00000066233 | Tmem42  | -0.111462807 | 0.237488231 | 0.518649126 |
| ENSMUSG00000028832 | Stmn1   | 0.080872372  | 0.237696875 | 0.51869868  |
| ENSMUSG00000035547 | Capn5   | -0.052954024 | 0.237671291 | 0.51869868  |
| ENSMUSG00000047146 | Tet1    | 0.087844892  | 0.237660267 | 0.51869868  |
| ENSMUSG00000052102 | Gnpda1  | -0.107893992 | 0.237648937 | 0.51869868  |
| ENSMUSG00000013787 | Ehmt2   | 0.106633896  | 0.237847787 | 0.518922622 |
| ENSMUSG00000028580 | Pum1    | -0.113537326 | 0.237883054 | 0.518922622 |
| ENSMUSG00000053916 | Nanp    | 0.093725884  | 0.238060952 | 0.519219506 |
| ENSMUSG00000011832 | Evi5l   | -0.11339135  | 0.238137478 | 0.519295226 |
| ENSMUSG00000022833 | Ccdc14  | -0.113503171 | 0.238197536 | 0.519335017 |
| ENSMUSG00000020571 | Pdia6   | 0.111150161  | 0.238258257 | 0.519359171 |
| ENSMUSG00000028894 | Inpp5b  | -0.113323083 | 0.23829224  | 0.519359171 |
| ENSMUSG00000028391 | Wdr31   | 0.10421487   | 0.238374852 | 0.519448077 |
| ENSMUSG00000022553 | Maf1    | -0.107109201 | 0.238537076 | 0.519710405 |
| ENSMUSG00000044864 | Ankrd50 | 0.067774843  | 0.238695414 | 0.519866409 |
| ENSMUSG00000046032 | Snx12   | 0.097877295  | 0.238673957 | 0.519866409 |
| ENSMUSG00000102135 | Gm37108 | 0.056890464  | 0.23873424  | 0.519866409 |
| ENSMUSG00000046380 | Jrk     | -0.09314862  | 0.238795787 | 0.519909284 |
| ENSMUSG00000028463 | Car9    | -0.109923543 | 0.239001206 | 0.520265331 |
| ENSMUSG00000028803 | Nipal3  | -0.104173325 | 0.239390261 | 0.520683745 |
| ENSMUSG00000031278 | Acsl4   | 0.068747057  | 0.239403017 | 0.520683745 |
| ENSMUSG00000033068 | Entpd6  | 0.11221639   | 0.239293018 | 0.520683745 |
| ENSMUSG00000059734 | Ndufs8  | 0.10416921   | 0.23938637  | 0.520683745 |
| ENSMUSG00000074749 | Kiz     | -0.113482527 | 0.239310786 | 0.520683745 |
| ENSMUSG00000030868 | Dctn5   | -0.093122598 | 0.23945219  | 0.520699519 |
| ENSMUSG00000032997 | Chpf    | -0.07501182  | 0.239514624 | 0.520744118 |
| ENSMUSG00000062590 | Armc9   | -0.103372011 | 0.239634752 | 0.520914115 |
| ENSMUSG00000024422 | Dhx16   | 0.112830553  | 0.239681021 | 0.520923528 |
| ENSMUSG00000034974 | Dapk3   | -0.103397075 | 0.239801934 | 0.521095141 |
| ENSMUSG00000073725 | Lmbrd1  | -0.112628568 | 0.239921377 | 0.521263499 |
| ENSMUSG00000002345 | Borcs8  | 0.107410819  | 0.240005101 | 0.521286712 |

|                    |         |              |             |             |
|--------------------|---------|--------------|-------------|-------------|
| ENSMUSG00000109901 | Chmp1b  | -0.096172555 | 0.240015997 | 0.521286712 |
| ENSMUSG00000038550 | Ciart   | 0.054577005  | 0.240260986 | 0.52172757  |
| ENSMUSG00000040785 | Ttc3    | 0.112817745  | 0.240352853 | 0.52183583  |
| ENSMUSG00000048249 | Crebrf  | -0.100605112 | 0.240491046 | 0.521979438 |
| ENSMUSG00000069874 | Irgm2   | -0.096568028 | 0.240503045 | 0.521979438 |
| ENSMUSG00000033475 | Tomm6   | 0.106090777  | 0.240687986 | 0.522199136 |
| ENSMUSG00000058542 | Gm15590 | 0.110598866  | 0.240713977 | 0.522199136 |
| ENSMUSG00000091462 | Gm17084 | 0.064968864  | 0.240730396 | 0.522199136 |
| ENSMUSG00000022574 | Naprt   | 0.0978891    | 0.240858483 | 0.522210186 |
| ENSMUSG00000027506 | Tpd52   | -0.10316095  | 0.240796567 | 0.522210186 |
| ENSMUSG00000043243 | Fam129c | -0.065118688 | 0.240861618 | 0.522210186 |
| ENSMUSG00000024645 | Timm21  | 0.094850625  | 0.241043901 | 0.522306175 |
| ENSMUSG00000029916 | Agk     | -0.100495294 | 0.241122132 | 0.522306175 |
| ENSMUSG00000030002 | Dusp11  | 0.101781946  | 0.241184458 | 0.522306175 |
| ENSMUSG00000032434 | Cmtm6   | -0.100159659 | 0.24106799  | 0.522306175 |
| ENSMUSG00000040283 | Btnl9   | 0.112142825  | 0.241200243 | 0.522306175 |
| ENSMUSG00000062859 | Tcp11   | -0.095509644 | 0.241106878 | 0.522306175 |
| ENSMUSG00000079262 | Slco1a6 | 0.073759461  | 0.241053499 | 0.522306175 |
| ENSMUSG00000059460 | Olfr286 | -0.058315221 | 0.241371609 | 0.522586151 |
| ENSMUSG00000021975 | Ints9   | -0.109251075 | 0.241499705 | 0.522772365 |
| ENSMUSG00000033739 | Fkbp1   | -0.08391896  | 0.241551127 | 0.522792568 |
| ENSMUSG00000041057 | Wdr43   | 0.114382712  | 0.242021433 | 0.523627977 |
| ENSMUSG00000046873 | Mbtps2  | -0.109224225 | 0.241981613 | 0.523627977 |
| ENSMUSG00000028274 | Rngtt   | -0.102500367 | 0.24214698  | 0.523808366 |
| ENSMUSG00000055884 | Fancm   | 0.081326707  | 0.242236613 | 0.523819807 |
| ENSMUSG00000073427 | Gm4924  | -0.069667297 | 0.242226041 | 0.523819807 |
| ENSMUSG00000038175 | Mylip   | -0.110786877 | 0.242295108 | 0.523855097 |
| ENSMUSG00000002825 | Qtrt1   | 0.113635725  | 0.242386575 | 0.523870479 |
| ENSMUSG00000056515 | Rab31   | -0.107460091 | 0.242361546 | 0.523870479 |
| ENSMUSG00000003779 | Kif20a  | -0.112366596 | 0.24259191  | 0.524040714 |
| ENSMUSG00000025453 | Nnt     | -0.081308203 | 0.242565295 | 0.524040714 |
| ENSMUSG00000026754 | Golga1  | -0.112038275 | 0.24253329  | 0.524040714 |
| ENSMUSG00000024604 | Rbm22   | 0.10242193   | 0.242700151 | 0.524092242 |
| ENSMUSG00000031379 | Pir     | -0.099314043 | 0.242672347 | 0.524092242 |
| ENSMUSG00000020656 | Grhl1   | -0.062176853 | 0.243236139 | 0.524611232 |
| ENSMUSG00000022538 | Lsg1    | 0.098059009  | 0.243056167 | 0.524611232 |
| ENSMUSG00000029843 | Slc13a4 | -0.059180336 | 0.243002081 | 0.524611232 |
| ENSMUSG00000031513 | Leprot1 | 0.109982286  | 0.243219425 | 0.524611232 |
| ENSMUSG00000035597 | Prpf39  | -0.108380887 | 0.243115106 | 0.524611232 |
| ENSMUSG00000066151 | Fkbp15  | -0.11132138  | 0.243229617 | 0.524611232 |
| ENSMUSG00000103034 | Gm8797  | -0.100201349 | 0.243201335 | 0.524611232 |
| ENSMUSG00000021037 | Ahsa1   | 0.092985796  | 0.243370585 | 0.524810075 |
| ENSMUSG00000007036 | Abhd16a | -0.110930372 | 0.243477685 | 0.524949891 |

|                    |          |              |             |             |
|--------------------|----------|--------------|-------------|-------------|
| ENSMUSG00000025198 | Erlin1   | -0.110665135 | 0.243539179 | 0.524982154 |
| ENSMUSG00000038005 | Hpf1     | 0.097828153  | 0.24357718  | 0.524982154 |
| ENSMUSG00000025351 | Cd63     | 0.107394343  | 0.243758416 | 0.52507912  |
| ENSMUSG00000032336 | Nptn     | -0.110099746 | 0.243723418 | 0.52507912  |
| ENSMUSG00000039481 | Nrtn     | 0.091485846  | 0.243714849 | 0.52507912  |
| ENSMUSG00000045132 | Olfrc620 | 0.110362698  | 0.243791264 | 0.52507912  |
| ENSMUSG00000005625 | Psmc4    | 0.097204786  | 0.243967027 | 0.525093474 |
| ENSMUSG00000026176 | Ctdsp1   | -0.09355245  | 0.243902965 | 0.525093474 |
| ENSMUSG00000102914 | Gm35106  | 0.108005094  | 0.243949568 | 0.525093474 |
| ENSMUSG00000113107 | Gm3338   | 0.068462593  | 0.24395645  | 0.525093474 |
| ENSMUSG00000022248 | Rad1     | -0.108768591 | 0.244116886 | 0.525109658 |
| ENSMUSG00000024579 | Pcyox1l  | -0.110676839 | 0.24414365  | 0.525109658 |
| ENSMUSG00000032184 | Lysmd2   | 0.089933165  | 0.244129119 | 0.525109658 |
| ENSMUSG00000032621 | Srek1    | 0.112283006  | 0.244093994 | 0.525109658 |
| ENSMUSG00000025241 | Fyco1    | -0.082352372 | 0.244457517 | 0.525582152 |
| ENSMUSG00000056018 | Ccdc7b   | 0.093957227  | 0.244490273 | 0.525582152 |
| ENSMUSG00000068250 | Amn1     | -0.110176205 | 0.244428581 | 0.525582152 |
| ENSMUSG00000113681 | Gm45930  | 0.11207306   | 0.244610436 | 0.525749477 |
| ENSMUSG00000092360 | Gm20441  | -0.020385392 | 0.244716245 | 0.525885895 |
| ENSMUSG00000024962 | Vegfb    | -0.109985804 | 0.244759955 | 0.525888843 |
| ENSMUSG00000005949 | Ctns     | -0.108117142 | 0.244971335 | 0.526202718 |
| ENSMUSG00000036810 | Cnep1r1  | -0.111486489 | 0.245008099 | 0.526202718 |
| ENSMUSG00000050697 | Prkaa1   | 0.110834207  | 0.245033131 | 0.526202718 |
| ENSMUSG00000017715 | Pgs1     | -0.106644103 | 0.245161157 | 0.526370823 |
| ENSMUSG00000082693 | Gm15190  | 0.109186725  | 0.245196166 | 0.526370823 |
| ENSMUSG00000005148 | Klf5     | -0.096418522 | 0.245485937 | 0.526479327 |
| ENSMUSG00000025287 | Acot9    | 0.086471749  | 0.245359596 | 0.526479327 |
| ENSMUSG00000038425 | Poli     | -0.107364552 | 0.245519491 | 0.526479327 |
| ENSMUSG00000042590 | lpo11    | 0.111133617  | 0.245443919 | 0.526479327 |
| ENSMUSG00000043140 | Tmem186  | -0.110526796 | 0.245543414 | 0.526479327 |
| ENSMUSG00000047534 | Mis18bp1 | -0.110718227 | 0.245443271 | 0.526479327 |
| ENSMUSG00000052298 | Cdc42se2 | -0.104208503 | 0.245376991 | 0.526479327 |
| ENSMUSG00000045328 | Cenpe    | -0.102960882 | 0.245800321 | 0.526939211 |
| ENSMUSG00000036432 | Siah2    | -0.109221034 | 0.24596891  | 0.527209633 |
| ENSMUSG00000020719 | Ddx5     | 0.086053458  | 0.246084114 | 0.527281902 |
| ENSMUSG00000030769 | Slc5a11  | 0.098275268  | 0.246087528 | 0.527281902 |
| ENSMUSG00000046879 | Irgm1    | -0.110209808 | 0.246161218 | 0.527348824 |
| ENSMUSG00000021241 | Isca2    | -0.103336945 | 0.246206673 | 0.527355248 |
| ENSMUSG00000006585 | Cdt1     | -0.098775426 | 0.246253111 | 0.527363775 |
| ENSMUSG00000028797 | Tmem234  | 0.102398843  | 0.246398969 | 0.527403343 |
| ENSMUSG00000039754 | Alkbh4   | -0.105060801 | 0.246380488 | 0.527403343 |
| ENSMUSG00000078154 | Gm12184  | -0.064156188 | 0.246384865 | 0.527403343 |
| ENSMUSG00000090619 | Vmn2r60  | 0.104201164  | 0.246455613 | 0.527433696 |

|                    |           |              |             |             |
|--------------------|-----------|--------------|-------------|-------------|
| ENSMUSG00000041926 | Rnpep     | 0.086124393  | 0.246611854 | 0.52749541  |
| ENSMUSG00000061136 | Prpf40a   | 0.11132771   | 0.246598569 | 0.52749541  |
| ENSMUSG00000062727 | Hist1h2bk | 0.049149211  | 0.246576665 | 0.52749541  |
| ENSMUSG00000027422 | Rrbp1     | 0.116609583  | 0.246693592 | 0.527579391 |
| ENSMUSG00000025997 | Ikzf2     | -0.067223039 | 0.246752231 | 0.527613955 |
| ENSMUSG00000010067 | Rassf1    | -0.107645094 | 0.247008379 | 0.527798223 |
| ENSMUSG00000044103 | Il1f9     | 0.102896434  | 0.246894862 | 0.527798223 |
| ENSMUSG00000080893 | Gm15920   | 0.110712089  | 0.246968964 | 0.527798223 |
| ENSMUSG00000082163 | Gm14276   | -0.090056724 | 0.247005069 | 0.527798223 |
| ENSMUSG00000028423 | Nfx1      | -0.089348441 | 0.247227269 | 0.528084249 |
| ENSMUSG00000060038 | Dhps      | 0.107994839  | 0.247196733 | 0.528084249 |
| ENSMUSG00000060950 | Trmt61a   | -0.099091638 | 0.24730105  | 0.528151021 |
| ENSMUSG00000038387 | Rras      | -0.066965547 | 0.247359636 | 0.528185326 |
| ENSMUSG00000036513 | Commd2    | 0.098485679  | 0.247431353 | 0.528247652 |
| ENSMUSG00000037060 | Cavin3    | 0.051260911  | 0.247512863 | 0.528330859 |
| ENSMUSG00000021716 | Srek1ip1  | -0.093878528 | 0.247746304 | 0.528738289 |
| ENSMUSG00000022906 | Parp9     | 0.111037261  | 0.247919071 | 0.528939582 |
| ENSMUSG00000040459 | Arglu1    | -0.105282367 | 0.247925791 | 0.528939582 |
| ENSMUSG00000031755 | Bbs2      | -0.099308897 | 0.248014564 | 0.529007744 |
| ENSMUSG00000071343 | Gm10327   | 0.062014503  | 0.24804292  | 0.529007744 |
| ENSMUSG00000022186 | Oxct1     | 0.111288933  | 0.248370763 | 0.529616008 |
| ENSMUSG00000000605 | Clcn4     | -0.107367629 | 0.248559469 | 0.529918018 |
| ENSMUSG00000021947 | Cryl1     | -0.109928743 | 0.248597721 | 0.529918018 |
| ENSMUSG00000027187 | Cat       | -0.092859904 | 0.248927237 | 0.529985301 |
| ENSMUSG00000028452 | Vcp       | -0.110466238 | 0.248771806 | 0.529985301 |
| ENSMUSG00000029920 | Smarcad1  | 0.109632586  | 0.248894386 | 0.529985301 |
| ENSMUSG00000043257 | Pigv      | -0.11013251  | 0.248927964 | 0.529985301 |
| ENSMUSG00000044068 | Zrsr1     | 0.079593381  | 0.248852393 | 0.529985301 |
| ENSMUSG00000048647 | Exd1      | -0.068980524 | 0.248809046 | 0.529985301 |
| ENSMUSG00000095891 | Gm10717   | -0.033162137 | 0.248713865 | 0.529985301 |
| ENSMUSG00000022911 | Arl13b    | 0.109521223  | 0.249181355 | 0.530342977 |
| ENSMUSG00000028158 | Mttp      | -0.099917862 | 0.249151768 | 0.530342977 |
| ENSMUSG00000034342 | Cbl       | -0.046178848 | 0.249276758 | 0.530455133 |
| ENSMUSG00000020671 | Rab10     | -0.093075793 | 0.249410884 | 0.530576406 |
| ENSMUSG00000108231 | Gm4045    | 0.094401137  | 0.24941918  | 0.530576406 |
| ENSMUSG00000022039 | Adam2     | 0.056953917  | 0.249482858 | 0.53062099  |
| ENSMUSG00000023980 | Taf8      | -0.109747651 | 0.249540793 | 0.530653345 |
| ENSMUSG00000073775 | Kti12     | 0.101271071  | 0.249659987 | 0.530815936 |
| ENSMUSG00000024665 | Fads2     | -0.070762916 | 0.249907297 | 0.531102535 |
| ENSMUSG00000038022 | Mindy4    | -0.089744579 | 0.249944808 | 0.531102535 |
| ENSMUSG00000040044 | Orc3      | 0.105411455  | 0.249965818 | 0.531102535 |
| ENSMUSG00000058756 | Thra      | 0.105991406  | 0.249960448 | 0.531102535 |
| ENSMUSG00000003199 | Mpnd      | -0.094180331 | 0.250048919 | 0.531188237 |

|                    |          |              |             |             |
|--------------------|----------|--------------|-------------|-------------|
| ENSMUSG00000015889 | Lta4h    | -0.100508549 | 0.250205788 | 0.53143059  |
| ENSMUSG00000069515 | Lyz1     | -0.067551271 | 0.250413811 | 0.531781492 |
| ENSMUSG00000039740 | Alg2     | -0.105660201 | 0.250461824 | 0.531792534 |
| ENSMUSG00000021775 | Nr1d2    | 0.096990598  | 0.250535834 | 0.531858759 |
| ENSMUSG00000104298 | Gm38040  | 0.110285388  | 0.250608671 | 0.531922471 |
| ENSMUSG00000022433 | Csnk1e   | -0.109700777 | 0.251019108 | 0.532161559 |
| ENSMUSG00000022779 | Top3b    | -0.101606289 | 0.250971998 | 0.532161559 |
| ENSMUSG00000024217 | Snrpc    | 0.103971553  | 0.25102211  | 0.532161559 |
| ENSMUSG00000033272 | Slc35a4  | -0.105009398 | 0.25081265  | 0.532161559 |
| ENSMUSG00000036975 | Tmem177  | -0.106602178 | 0.250902763 | 0.532161559 |
| ENSMUSG00000051223 | Bzw1     | 0.099405505  | 0.251064064 | 0.532161559 |
| ENSMUSG00000055862 | Izumo4   | -0.101680194 | 0.250903306 | 0.532161559 |
| ENSMUSG00000078439 | Smim24   | -0.105399698 | 0.25103194  | 0.532161559 |
| ENSMUSG00000021013 | Ttc8     | -0.054795092 | 0.251144169 | 0.532240526 |
| ENSMUSG00000023795 | Pisd-ps2 | -0.088726491 | 0.251289601 | 0.532371539 |
| ENSMUSG00000051256 | Jagn1    | 0.10464633   | 0.251311131 | 0.532371539 |
| ENSMUSG00000052407 | Ccdc171  | -0.089477648 | 0.251334571 | 0.532371539 |
| ENSMUSG00000042572 | Ube2q1   | -0.107100217 | 0.251410505 | 0.532441583 |
| ENSMUSG00000084166 | Gm6451   | -0.051293415 | 0.251477896 | 0.532493512 |
| ENSMUSG00000008690 | Ncaph2   | -0.097335639 | 0.25152683  | 0.532506349 |
| ENSMUSG00000030978 | Rrm1     | 0.092614962  | 0.251635004 | 0.532644578 |
| ENSMUSG00000000441 | Raf1     | -0.108457534 | 0.251774004 | 0.532757223 |
| ENSMUSG00000032998 | Foxj3    | -0.055547701 | 0.251760072 | 0.532757223 |
| ENSMUSG00000027858 | Tspan2   | 0.10422488   | 0.251889889 | 0.532911652 |
| ENSMUSG00000030401 | Rtn2     | 0.076871748  | 0.251955063 | 0.53295876  |
| ENSMUSG00000026181 | Ppm1f    | 0.108064413  | 0.252009305 | 0.532982732 |
| ENSMUSG00000031314 | Taf1     | 0.108996672  | 0.252496115 | 0.533417818 |
| ENSMUSG00000034848 | Ttc21b   | -0.101542511 | 0.252515641 | 0.533417818 |
| ENSMUSG00000034917 | Tjp3     | -0.100091043 | 0.252483092 | 0.533417818 |
| ENSMUSG00000036923 | Stox1    | -0.080907948 | 0.252461094 | 0.533417818 |
| ENSMUSG00000042202 | Slc35e2  | -0.099284592 | 0.252422551 | 0.533417818 |
| ENSMUSG00000060261 | Gtf2i    | -0.104545458 | 0.252483698 | 0.533417818 |
| ENSMUSG00000072680 | Tmem254c | 0.092779799  | 0.252310228 | 0.533417818 |
| ENSMUSG00000045934 | Mtmr11   | -0.053930087 | 0.252655673 | 0.533559949 |
| ENSMUSG00000046605 | B3gnt1   | -0.106478925 | 0.252668837 | 0.533559949 |
| ENSMUSG00000002365 | Snx9     | -0.109220656 | 0.252812447 | 0.533718217 |
| ENSMUSG00000079685 | Ulbp1    | -0.065426534 | 0.252829723 | 0.533718217 |
| ENSMUSG00000028345 | Tex10    | -0.094071858 | 0.25304476  | 0.534081388 |
| ENSMUSG00000021068 | Nin      | 0.093237967  | 0.253257946 | 0.534440529 |
| ENSMUSG00000049940 | Pgrmc2   | -0.108779028 | 0.253307658 | 0.534454633 |
| ENSMUSG00000026098 | Pms1     | -0.108615343 | 0.253817238 | 0.535425394 |
| ENSMUSG00000031197 | Vbp1     | 0.094226294  | 0.253864447 | 0.535425394 |
| ENSMUSG00000032806 | Slc10a3  | -0.102018708 | 0.253897075 | 0.535425394 |

|                    |           |              |             |             |
|--------------------|-----------|--------------|-------------|-------------|
| ENSMUSG00000093954 | Gm16867   | 0.104745505  | 0.254039936 | 0.535635723 |
| ENSMUSG00000038344 | Txlng     | 0.108669598  | 0.254103537 | 0.535678892 |
| ENSMUSG00000027435 | Cd93      | -0.107502565 | 0.254424402 | 0.536123283 |
| ENSMUSG00000030204 | Ddx47     | 0.106962507  | 0.254443825 | 0.536123283 |
| ENSMUSG00000066543 | Rpl17-ps9 | 0.067703827  | 0.254395958 | 0.536123283 |
| ENSMUSG00000074553 | Eif1-ps1  | 0.045959829  | 0.254495074 | 0.536140318 |
| ENSMUSG00000025958 | Creb1     | 0.108936646  | 0.254704472 | 0.536446972 |
| ENSMUSG00000031987 | Egln1     | -0.106407349 | 0.254727014 | 0.536446972 |
| ENSMUSG00000042505 | Sdhaf3    | 0.109217983  | 0.254805468 | 0.536521226 |
| ENSMUSG00000024169 | lft140    | -0.065282572 | 0.254916655 | 0.536664367 |
| ENSMUSG00000020185 | E2f7      | -0.088845142 | 0.255233652 | 0.537020067 |
| ENSMUSG00000038369 | Ncoa6     | 0.084184541  | 0.255258552 | 0.537020067 |
| ENSMUSG00000040025 | Ythdf2    | 0.092830255  | 0.255173461 | 0.537020067 |
| ENSMUSG00000041390 | Mdfic     | -0.108422408 | 0.25520474  | 0.537020067 |
| ENSMUSG00000002910 | Arrdc2    | -0.072322781 | 0.255473884 | 0.537199014 |
| ENSMUSG00000024101 | Washc1    | -0.079163635 | 0.255638804 | 0.537199014 |
| ENSMUSG00000024354 | Slc23a1   | 0.054526781  | 0.25565625  | 0.537199014 |
| ENSMUSG00000028917 | Plekhm2   | -0.069733485 | 0.255606519 | 0.537199014 |
| ENSMUSG00000040710 | St8sia4   | 0.109946687  | 0.255511247 | 0.537199014 |
| ENSMUSG00000079481 | Nhsl2     | -0.091133027 | 0.255472907 | 0.537199014 |
| ENSMUSG00000085442 | Gm3362    | 0.067470579  | 0.255689604 | 0.537199014 |
| ENSMUSG00000113640 | Adat3     | 0.107760193  | 0.255676513 | 0.537199014 |
| ENSMUSG00000052512 | Nav2      | 0.076393639  | 0.255786319 | 0.537311325 |
| ENSMUSG00000020186 | Csrp2     | 0.102212925  | 0.255842506 | 0.537338479 |
| ENSMUSG00000028708 | Mknk1     | -0.109634333 | 0.255904437 | 0.537377686 |
| ENSMUSG00000046865 | Fbl       | 0.098498064  | 0.255997377 | 0.537391147 |
| ENSMUSG00000116562 | Gm46542   | 0.108240188  | 0.255987042 | 0.537391147 |
| ENSMUSG00000067825 | Pex26     | -0.079647789 | 0.256058184 | 0.537427967 |
| ENSMUSG00000003949 | Hlf       | 0.075961882  | 0.256228454 | 0.537512856 |
| ENSMUSG00000030319 | Cand2     | -0.081785431 | 0.256206682 | 0.537512856 |
| ENSMUSG00000036898 | Zfp157    | -0.106614057 | 0.25615505  | 0.537512856 |
| ENSMUSG00000038543 | BC028528  | -0.107606491 | 0.256317365 | 0.537608577 |
| ENSMUSG00000003444 | Med29     | 0.101342832  | 0.256502294 | 0.53781482  |
| ENSMUSG00000022215 | Fitm1     | -0.072271367 | 0.256501901 | 0.53781482  |
| ENSMUSG00000025813 | Homer2    | -0.052518994 | 0.256545964 | 0.537815599 |
| ENSMUSG00000028437 | Ubap1     | -0.107227995 | 0.256769609 | 0.538193607 |
| ENSMUSG00000024759 | Atl3      | 0.103399239  | 0.256882114 | 0.538338575 |
| ENSMUSG00000035248 | Tut7      | 0.108294743  | 0.25716286  | 0.538836014 |
| ENSMUSG00000040370 | Etfrf1    | 0.108950721  | 0.257367567 | 0.539173984 |
| ENSMUSG00000069439 | Gm8444    | 0.069912077  | 0.257619727 | 0.539520255 |
| ENSMUSG00000093661 | Eif4e3    | -0.104364874 | 0.257594156 | 0.539520255 |
| ENSMUSG00000034160 | Ogt       | -0.106670721 | 0.257930893 | 0.539898825 |
| ENSMUSG00000040327 | Cul9      | -0.088782633 | 0.257901724 | 0.539898825 |

|                    |         |              |             |             |
|--------------------|---------|--------------|-------------|-------------|
| ENSMUSG00000105370 | Gm42718 | 0.051968232  | 0.257891495 | 0.539898825 |
| ENSMUSG00000028381 | Ugcg    | -0.070289226 | 0.258008544 | 0.539970367 |
| ENSMUSG00000034173 | Zbed5   | -0.079891383 | 0.258337588 | 0.540567922 |
| ENSMUSG00000026457 | Adipor1 | -0.103356102 | 0.258458145 | 0.540638029 |
| ENSMUSG00000034088 | Hdlbp   | 0.102182767  | 0.25843897  | 0.540638029 |
| ENSMUSG00000027455 | Nsfl1c  | 0.099279896  | 0.259039596 | 0.541763061 |
| ENSMUSG00000051335 | Gfod1   | 0.069899345  | 0.25908848  | 0.541774075 |
| ENSMUSG00000078453 | Abrac1  | 0.093667273  | 0.259153823 | 0.541819497 |
| ENSMUSG00000027776 | Il12a   | -0.106536756 | 0.25926215  | 0.541954758 |
| ENSMUSG00000016239 | Lonrf3  | 0.083151159  | 0.259570542 | 0.542407954 |
| ENSMUSG00000022552 | Sharpin | -0.092909003 | 0.259570461 | 0.542407954 |
| ENSMUSG00000081272 | Gm13509 | 0.027157084  | 0.259609958 | 0.542407954 |
| ENSMUSG00000005732 | Ranbp1  | 0.107681378  | 0.259879402 | 0.542555936 |
| ENSMUSG00000016664 | Pacsin2 | -0.103726695 | 0.259847672 | 0.542555936 |
| ENSMUSG00000021597 | Slf1    | 0.107236534  | 0.259899188 | 0.542555936 |
| ENSMUSG00000048486 | Fitm2   | 0.106019702  | 0.259746381 | 0.542555936 |
| ENSMUSG00000074643 | Cpne1   | -0.108075204 | 0.259798894 | 0.542555936 |
| ENSMUSG00000036840 | Siah1a  | -0.10723155  | 0.260073012 | 0.542580654 |
| ENSMUSG00000040121 | Rep15   | -0.106678248 | 0.260114907 | 0.542580654 |
| ENSMUSG00000042524 | Sun2    | -0.088231032 | 0.260099912 | 0.542580654 |
| ENSMUSG00000043557 | Mdga1   | -0.04885736  | 0.260129441 | 0.542580654 |
| ENSMUSG00000053870 | Fpgt    | -0.082781779 | 0.260107346 | 0.542580654 |
| ENSMUSG00000030042 | Pole4   | 0.100090542  | 0.260305407 | 0.542856524 |
| ENSMUSG00000032109 | Nlrx1   | -0.097494743 | 0.260491084 | 0.543152552 |
| ENSMUSG00000082241 | Gng5-ps | 0.099543362  | 0.260672101 | 0.543438767 |
| ENSMUSG00000028800 | Hdac1   | 0.081301665  | 0.26088475  | 0.543790817 |
| ENSMUSG00000007610 | Gtpbp3  | -0.106051851 | 0.260971628 | 0.543880636 |
| ENSMUSG00000021794 | Glud1   | -0.09685015  | 0.261020037 | 0.543890268 |
| ENSMUSG00000040128 | Pnrc1   | -0.103825723 | 0.261217074 | 0.544188034 |
| ENSMUSG00000078812 | Eif5a   | 0.112159149  | 0.261250564 | 0.544188034 |
| ENSMUSG00000022897 | Dyrk1a  | -0.095669517 | 0.261377955 | 0.5443073   |
| ENSMUSG00000026554 | Dcaf8   | -0.089773971 | 0.261395463 | 0.5443073   |
| ENSMUSG00000024212 | Mllt1   | -0.084395852 | 0.261613922 | 0.544670889 |
| ENSMUSG00000034007 | Scaper  | -0.094387666 | 0.2616623   | 0.544680313 |
| ENSMUSG00000033953 | Ppp3r1  | 0.050181827  | 0.261773511 | 0.544729231 |
| ENSMUSG00000036826 | Igflr1  | -0.03355421  | 0.261748049 | 0.544729231 |
| ENSMUSG00000044018 | Mrpl50  | 0.098002627  | 0.262086215 | 0.545288589 |
| ENSMUSG00000058690 | Ccser2  | 0.106576324  | 0.262164229 | 0.545359553 |
| ENSMUSG00000032215 | Rsl24d1 | 0.098403162  | 0.262320174 | 0.545592578 |
| ENSMUSG00000062210 | Tnfaip8 | 0.090631005  | 0.262415045 | 0.545607176 |
| ENSMUSG00000071661 | Zbtb3   | -0.10278432  | 0.262398477 | 0.545607176 |
| ENSMUSG00000040466 | Blvrb   | -0.105329453 | 0.262552846 | 0.545710994 |
| ENSMUSG00000044400 | Sowahd  | 0.059793718  | 0.262544951 | 0.545710994 |

|                    |               |              |             |             |
|--------------------|---------------|--------------|-------------|-------------|
| ENSMUSG00000093803 | Ppp2r3d       | -0.102414701 | 0.262622582 | 0.545764612 |
| ENSMUSG00000074649 | BC029722      | -0.105221869 | 0.262789889 | 0.546020945 |
| ENSMUSG00000020988 | L2hgdh        | 0.106321106  | 0.262939929 | 0.546149976 |
| ENSMUSG00000026883 | Dab2ip        | -0.093612434 | 0.262906058 | 0.546149976 |
| ENSMUSG00000015290 | Ubl4a         | 0.103445057  | 0.263028991 | 0.546243622 |
| ENSMUSG00000020034 | Tcp11l2       | -0.106331856 | 0.263120475 | 0.546261956 |
| ENSMUSG00000039917 | Rhbdd2        | -0.101344707 | 0.263125778 | 0.546261956 |
| ENSMUSG00000028670 | Lypla2        | -0.105750365 | 0.263239439 | 0.546406596 |
| ENSMUSG00000016253 | Nelfcd        | -0.104992758 | 0.263336229 | 0.546516174 |
| ENSMUSG00000023938 | Aars2         | -0.102693382 | 0.26346096  | 0.546594114 |
| ENSMUSG00000030707 | Coro1a        | -0.095732858 | 0.263461795 | 0.546594114 |
| ENSMUSG00000113113 | Gm2614        | 0.057727486  | 0.263608877 | 0.546807926 |
| ENSMUSG00000037772 | Mrpl23        | -0.102664206 | 0.263783432 | 0.547078646 |
| ENSMUSG00000013465 | Nelfb         | -0.106009622 | 0.263842922 | 0.547110673 |
| ENSMUSG00000004451 | Ralb          | -0.089626757 | 0.263938419 | 0.547217343 |
| ENSMUSG00000031821 | Gins2         | 0.096173756  | 0.264014705 | 0.547284153 |
| ENSMUSG00000026173 | Plcd4         | 0.040615436  | 0.264149984 | 0.54747321  |
| ENSMUSG00000025869 | Nop16         | 0.104739328  | 0.264453963 | 0.547938584 |
| ENSMUSG00000036737 | Oxsr1         | 0.105511894  | 0.264462749 | 0.547938584 |
| ENSMUSG00000017386 | Traf4         | -0.083686636 | 0.26482213  | 0.548134591 |
| ENSMUSG00000021629 | Slc30a5       | -0.084788309 | 0.264777696 | 0.548134591 |
| ENSMUSG00000035376 | Hacd2         | 0.104753612  | 0.26472756  | 0.548134591 |
| ENSMUSG00000036550 | Cnot1         | 0.098633784  | 0.264745434 | 0.548134591 |
| ENSMUSG00000037001 | Zfp39         | -0.098081144 | 0.264627227 | 0.548134591 |
| ENSMUSG00000042772 | Smg7          | -0.105733187 | 0.264795562 | 0.548134591 |
| ENSMUSG00000035382 | Pcsk7         | -0.093314611 | 0.26490699  | 0.548218881 |
| ENSMUSG00000006941 | Eif1b         | 0.090111822  | 0.265333684 | 0.548644863 |
| ENSMUSG00000033222 | Ttf2          | -0.10417533  | 0.26518051  | 0.548644863 |
| ENSMUSG00000060152 | Pop5          | 0.093316633  | 0.265232713 | 0.548644863 |
| ENSMUSG00000066861 | Oas1g         | 0.066624773  | 0.265303701 | 0.548644863 |
| ENSMUSG00000091449 | Gm10269       | 0.09019172   | 0.265256518 | 0.548644863 |
| ENSMUSG00000018697 | Aatf          | 0.103867708  | 0.265570712 | 0.549033748 |
| ENSMUSG00000018932 | Map2k3        | -0.099013137 | 0.26561016  | 0.549033748 |
| ENSMUSG00000026806 | Ddx31         | -0.105750927 | 0.265679092 | 0.54908486  |
| ENSMUSG00000039826 | Trub2         | 0.099169164  | 0.265724646 | 0.549087644 |
| ENSMUSG00000024866 | Acy3          | 0.088578424  | 0.265795082 | 0.549141836 |
| ENSMUSG00000035842 | Ddx11         | -0.085897069 | 0.26601697  | 0.549508862 |
| ENSMUSG00000042203 | Tbc1d22b      | -0.090378597 | 0.266202557 | 0.549800791 |
| ENSMUSG00000100621 | Gm28374       | -0.05332831  | 0.266258254 | 0.549824401 |
| ENSMUSG00000003119 | Cdk12         | 0.092005397  | 0.266552071 | 0.550085731 |
| ENSMUSG00000006423 | C330007P06Rik | 0.104273255  | 0.266641032 | 0.550085731 |
| ENSMUSG00000022025 | Cnmd          | 0.080271518  | 0.266683312 | 0.550085731 |
| ENSMUSG00000024403 | Atp6v1g2      | -0.100049842 | 0.2667391   | 0.550085731 |

|                    |           |              |             |             |
|--------------------|-----------|--------------|-------------|-------------|
| ENSMUSG00000025268 | Maged2    | 0.104193854  | 0.266726445 | 0.550085731 |
| ENSMUSG00000025395 | Prim1     | -0.099124455 | 0.266661651 | 0.550085731 |
| ENSMUSG00000031337 | Mtm1      | -0.101636706 | 0.266540412 | 0.550085731 |
| ENSMUSG00000038506 | Dcun1d2   | -0.105691578 | 0.266705361 | 0.550085731 |
| ENSMUSG00000034485 | Uaca      | 0.046233512  | 0.266784665 | 0.550088367 |
| ENSMUSG00000071419 | Rps15-ps2 | 0.059892797  | 0.266887691 | 0.550209461 |
| ENSMUSG00000010517 | Faf1      | -0.104155477 | 0.267140675 | 0.550274348 |
| ENSMUSG00000031077 | Fadd      | -0.091285816 | 0.267067598 | 0.550274348 |
| ENSMUSG00000052914 | Cyp2j6    | 0.103686873  | 0.267015748 | 0.550274348 |
| ENSMUSG00000053964 | Lgals4    | -0.094071985 | 0.267139969 | 0.550274348 |
| ENSMUSG00000075054 | Yae1d1    | -0.104407825 | 0.267130409 | 0.550274348 |
| ENSMUSG00000091931 | Gon7      | -0.098190154 | 0.267336163 | 0.55058572  |
| ENSMUSG00000083844 | Ube2d-ps  | 0.098333294  | 0.26743866  | 0.550705504 |
| ENSMUSG00000024099 | Ndufv2    | 0.104824058  | 0.267860524 | 0.551436547 |
| ENSMUSG00000024120 | Lrp1      | -0.104666306 | 0.267882467 | 0.551436547 |
| ENSMUSG00000039781 | Cep131    | -0.097211522 | 0.268054267 | 0.551607364 |
| ENSMUSG00000066878 | Gm10184   | 0.106277236  | 0.268048821 | 0.551607364 |
| ENSMUSG00000024472 | Dcp2      | 0.099502321  | 0.268342802 | 0.552109648 |
| ENSMUSG00000023947 | Nfkbie    | -0.101848527 | 0.268509598 | 0.552361331 |
| ENSMUSG00000045362 | Tnfrsf26  | 0.099947259  | 0.268564365 | 0.552382511 |
| ENSMUSG00000057137 | Tmem140   | -0.033088173 | 0.268643921 | 0.552454659 |
| ENSMUSG00000080268 | Brms1     | 0.08893689   | 0.268856505 | 0.552800306 |
| ENSMUSG00000022443 | Myh9      | -0.088711952 | 0.269041133 | 0.552996841 |
| ENSMUSG00000054931 | Zkscan4   | -0.057290836 | 0.26901451  | 0.552996841 |
| ENSMUSG00000019832 | Rab32     | -0.085832384 | 0.269270968 | 0.553217654 |
| ENSMUSG00000022414 | Tab1      | -0.102458781 | 0.269326717 | 0.553217654 |
| ENSMUSG00000047604 | Frat2     | -0.101170518 | 0.269206097 | 0.553217654 |
| ENSMUSG00000082360 | Gm8814    | 0.081713584  | 0.269322546 | 0.553217654 |
| ENSMUSG00000025868 | Higd2a    | 0.080773572  | 0.269427567 | 0.553333303 |
| ENSMUSG00000042298 | Ttc19     | -0.104174616 | 0.269619024 | 0.553634965 |
| ENSMUSG00000042271 | Nxt2      | -0.097070837 | 0.269905909 | 0.554132445 |
| ENSMUSG00000026319 | Relch     | 0.099596365  | 0.27002793  | 0.554275829 |
| ENSMUSG00000039795 | Zfand1    | 0.103691771  | 0.270064996 | 0.554275829 |
| ENSMUSG00000028212 | Ccne2     | -0.098427776 | 0.270119537 | 0.554296179 |
| ENSMUSG00000007415 | Gatad1    | -0.103002166 | 0.271268926 | 0.554736787 |
| ENSMUSG00000013974 | Mcomp1    | 0.089217828  | 0.270642768 | 0.554736787 |
| ENSMUSG00000017718 | Afmid     | -0.070707538 | 0.270911799 | 0.554736787 |
| ENSMUSG00000019868 | Vta1      | 0.097620041  | 0.271338879 | 0.554736787 |
| ENSMUSG00000023007 | Prpf40b   | -0.072408798 | 0.271322628 | 0.554736787 |
| ENSMUSG00000025609 | Mkln1     | -0.104670232 | 0.270511359 | 0.554736787 |
| ENSMUSG00000026705 | Klhl20    | -0.087592801 | 0.271406123 | 0.554736787 |
| ENSMUSG00000027765 | P2ry1     | -0.099970051 | 0.27050208  | 0.554736787 |
| ENSMUSG00000027983 | Cyp2u1    | 0.081672108  | 0.271227281 | 0.554736787 |

|                    |          |              |             |             |
|--------------------|----------|--------------|-------------|-------------|
| ENSMUSG00000031753 | Cog4     | -0.102965339 | 0.271083857 | 0.554736787 |
| ENSMUSG00000032410 | Xrn1     | -0.104493319 | 0.270978638 | 0.554736787 |
| ENSMUSG00000032913 | Lrig2    | -0.083280933 | 0.270812535 | 0.554736787 |
| ENSMUSG00000033313 | Fbxl8    | -0.096620904 | 0.271227411 | 0.554736787 |
| ENSMUSG00000034333 | Zbed4    | 0.104619909  | 0.270966284 | 0.554736787 |
| ENSMUSG00000037096 | Gm9762   | -0.095741894 | 0.270956083 | 0.554736787 |
| ENSMUSG00000040363 | Bcor     | -0.104526916 | 0.27080499  | 0.554736787 |
| ENSMUSG00000040432 | Ltb4r2   | -0.057718242 | 0.270911147 | 0.554736787 |
| ENSMUSG00000047617 | Paxx     | 0.104155037  | 0.271306437 | 0.554736787 |
| ENSMUSG00000051212 | Gpr183   | -0.091443528 | 0.270802659 | 0.554736787 |
| ENSMUSG00000052752 | Traf7    | -0.104361701 | 0.271402341 | 0.554736787 |
| ENSMUSG00000056629 | Fkbp2    | 0.093975128  | 0.271143089 | 0.554736787 |
| ENSMUSG00000062115 | Rai1     | 0.094183436  | 0.27137842  | 0.554736787 |
| ENSMUSG00000079610 | Ankrd39  | 0.10013595   | 0.271379376 | 0.554736787 |
| ENSMUSG00000081953 | Gm12435  | 0.071369991  | 0.270897563 | 0.554736787 |
| ENSMUSG00000001247 | Lsr      | -0.050886335 | 0.271577519 | 0.554748238 |
| ENSMUSG00000012396 | Nanog    | -0.096319475 | 0.271488731 | 0.554748238 |
| ENSMUSG00000031534 | Smim19   | -0.104248032 | 0.271590374 | 0.554748238 |
| ENSMUSG00000076609 | Igkc     | -0.013159184 | 0.271551354 | 0.554748238 |
| ENSMUSG00000034487 | Kdelc2   | -0.096066466 | 0.271780145 | 0.555044588 |
| ENSMUSG00000028961 | Pgd      | 0.095977328  | 0.271929524 | 0.555167097 |
| ENSMUSG00000038775 | Vill     | -0.103728839 | 0.271913181 | 0.555167097 |
| ENSMUSG00000024180 | Tmem8    | -0.090240396 | 0.272209817 | 0.55564801  |
| ENSMUSG00000026799 | Med27    | 0.097271908  | 0.272313978 | 0.555769293 |
| ENSMUSG00000016194 | Hsd11b1  | 0.101747242  | 0.272477382 | 0.556011427 |
| ENSMUSG00000002274 | Metrn    | 0.10274593   | 0.272731381 | 0.556438318 |
| ENSMUSG00000053411 | Cbx7     | -0.056259345 | 0.272812015 | 0.55651142  |
| ENSMUSG00000017686 | Rhot1    | -0.102346398 | 0.272892405 | 0.55658314  |
| ENSMUSG00000027763 | Mbnl1    | -0.101358472 | 0.272952826 | 0.55658314  |
| ENSMUSG00000029156 | Sgcb     | -0.102857666 | 0.273026413 | 0.55658314  |
| ENSMUSG00000063808 | Gpatch1  | -0.102907627 | 0.27298442  | 0.55658314  |
| ENSMUSG00000026632 | Tatdn3   | 0.096933251  | 0.273082593 | 0.556606316 |
| ENSMUSG00000042647 | Acad12   | -0.067408703 | 0.273141524 | 0.55663509  |
| ENSMUSG00000026425 | Srgap2   | 0.104194234  | 0.27348566  | 0.556978875 |
| ENSMUSG00000027597 | Ahcy     | -0.103344671 | 0.273668954 | 0.556978875 |
| ENSMUSG00000038383 | Pigu     | 0.103960168  | 0.273557394 | 0.556978875 |
| ENSMUSG00000039234 | Sec24d   | -0.092159154 | 0.273570481 | 0.556978875 |
| ENSMUSG00000044876 | Zfp444   | -0.094651344 | 0.273623056 | 0.556978875 |
| ENSMUSG00000050395 | Tnfsf15  | -0.054653042 | 0.273558751 | 0.556978875 |
| ENSMUSG00000054737 | Zfp182   | -0.097935783 | 0.273419285 | 0.556978875 |
| ENSMUSG00000083716 | Gm13436  | 0.04445349   | 0.273628109 | 0.556978875 |
| ENSMUSG00000035770 | Dync1li2 | 0.103479588  | 0.273835359 | 0.557226244 |
| ENSMUSG00000058006 | Mdn1     | 0.087154132  | 0.274052378 | 0.557576509 |

|                    |               |              |             |             |
|--------------------|---------------|--------------|-------------|-------------|
| ENSMUSG00000031805 | Jak3          | 0.103748621  | 0.274135743 | 0.557654777 |
| ENSMUSG00000002111 | Spi1          | -0.093901586 | 0.274310975 | 0.557919865 |
| ENSMUSG00000053333 | Dis3l2        | -0.102451399 | 0.274420977 | 0.558052219 |
| ENSMUSG00000020125 | Elane         | -0.10099945  | 0.27468363  | 0.558162906 |
| ENSMUSG00000034303 | Ccdc15        | -0.103617315 | 0.274588348 | 0.558162906 |
| ENSMUSG00000045576 | St7l          | -0.103029986 | 0.27455941  | 0.558162906 |
| ENSMUSG00000068220 | Lgals1        | -0.10113742  | 0.274700092 | 0.558162906 |
| ENSMUSG00000078566 | Bnip3         | 0.10192669   | 0.274624401 | 0.558162906 |
| ENSMUSG00000037710 | Cisd1         | -0.085740146 | 0.274754481 | 0.558182107 |
| ENSMUSG00000026669 | Mcm10         | -0.10318286  | 0.275040326 | 0.558405725 |
| ENSMUSG00000027163 | Commd9        | 0.101034978  | 0.275176796 | 0.558405725 |
| ENSMUSG00000027804 | Ppid          | 0.102577107  | 0.275224205 | 0.558405725 |
| ENSMUSG00000028809 | Srrm1         | 0.099049379  | 0.274911514 | 0.558405725 |
| ENSMUSG00000029545 | Acads         | -0.082071935 | 0.275142358 | 0.558405725 |
| ENSMUSG00000057841 | Rpl32         | 0.093292975  | 0.27508357  | 0.558405725 |
| ENSMUSG00000062861 | Zfp28         | 0.069032485  | 0.275049424 | 0.558405725 |
| ENSMUSG00000066571 | 4931406P16Rik | 0.038236609  | 0.275206937 | 0.558405725 |
| ENSMUSG00000006304 | Arpc2         | -0.102966366 | 0.275542726 | 0.558796243 |
| ENSMUSG00000027030 | Stk39         | -0.065505956 | 0.275779705 | 0.558796243 |
| ENSMUSG00000027465 | Tbc1d20       | 0.099330805  | 0.275717607 | 0.558796243 |
| ENSMUSG00000031168 | Ebp           | 0.093592479  | 0.275735788 | 0.558796243 |
| ENSMUSG00000034108 | Ccs           | 0.101574444  | 0.275852616 | 0.558796243 |
| ENSMUSG00000036053 | Fmnl2         | 0.053053787  | 0.27577223  | 0.558796243 |
| ENSMUSG00000039254 | Pomt1         | -0.10294021  | 0.275662209 | 0.558796243 |
| ENSMUSG00000066148 | Prpf4         | -0.093234226 | 0.275866561 | 0.558796243 |
| ENSMUSG00000067529 | Olf1423       | -0.051569029 | 0.275769881 | 0.558796243 |
| ENSMUSG00000102976 | Zc3h11a       | -0.095551188 | 0.27550719  | 0.558796243 |
| ENSMUSG00000002297 | Dbf4          | 0.096777321  | 0.275934197 | 0.558842111 |
| ENSMUSG00000026404 | Ddx59         | -0.092059422 | 0.27602668  | 0.558938277 |
| ENSMUSG00000073682 | Gm10563       | -0.059039334 | 0.276386399 | 0.559575462 |
| ENSMUSG00000005656 | Snx6          | 0.099310526  | 0.276478243 | 0.559626931 |
| ENSMUSG00000044937 | Ttc41         | -0.052667411 | 0.27650193  | 0.559626931 |
| ENSMUSG00000006215 | Zbtb17        | -0.099542554 | 0.277068561 | 0.559742022 |
| ENSMUSG00000010936 | Vac14         | -0.102832621 | 0.276729567 | 0.559742022 |
| ENSMUSG00000019718 | L3hpdh        | 0.053700907  | 0.276629816 | 0.559742022 |
| ENSMUSG00000022346 | Myc           | -0.102871846 | 0.277099565 | 0.559742022 |
| ENSMUSG00000026991 | Pkp4          | 0.077345265  | 0.276689868 | 0.559742022 |
| ENSMUSG00000027660 | Skil          | -0.058242457 | 0.276908318 | 0.559742022 |
| ENSMUSG00000029176 | Anapc4        | 0.095069632  | 0.276916229 | 0.559742022 |
| ENSMUSG00000032264 | Zw10          | -0.101051888 | 0.277075153 | 0.559742022 |
| ENSMUSG00000034614 | Pik3ip1       | -0.09865012  | 0.276858055 | 0.559742022 |
| ENSMUSG00000034761 | Map4k5        | -0.100816199 | 0.277032911 | 0.559742022 |
| ENSMUSG00000054099 | Slc25a40      | 0.074918706  | 0.276841574 | 0.559742022 |

|                    |               |              |             |             |
|--------------------|---------------|--------------|-------------|-------------|
| ENSMUSG00000093930 | Hmgcs1        | -0.092261347 | 0.276931507 | 0.559742022 |
| ENSMUSG00000024379 | Tslp          | 0.10281795   | 0.277374164 | 0.56004931  |
| ENSMUSG00000045327 | 6330549D23Rik | 0.059273447  | 0.277386954 | 0.56004931  |
| ENSMUSG00000059316 | Slc27a4       | -0.09069707  | 0.277334104 | 0.56004931  |
| ENSMUSG00000061286 | Exosc5        | 0.095548449  | 0.277474095 | 0.5601342   |
| ENSMUSG00000020635 | Fkbp1b        | -0.10242835  | 0.27783524  | 0.560498865 |
| ENSMUSG00000023008 | Fmnl3         | -0.094554994 | 0.277790757 | 0.560498865 |
| ENSMUSG00000029918 | Mrps33        | 0.101467028  | 0.277768603 | 0.560498865 |
| ENSMUSG00000038013 | Wipf2         | 0.075329271  | 0.277800369 | 0.560498865 |
| ENSMUSG00000114172 | Gm36298       | -0.067517011 | 0.277882817 | 0.56050381  |
| ENSMUSG00000007827 | Ankrd26       | -0.102304455 | 0.278221121 | 0.560529069 |
| ENSMUSG00000018654 | Ikzf1         | -0.070138622 | 0.278063878 | 0.560529069 |
| ENSMUSG00000025969 | Nrp2          | 0.074257636  | 0.27803324  | 0.560529069 |
| ENSMUSG00000027198 | Ext2          | -0.099745711 | 0.278079827 | 0.560529069 |
| ENSMUSG00000039361 | Picalm        | 0.071882031  | 0.278034096 | 0.560529069 |
| ENSMUSG00000040813 | Tex264        | -0.090656191 | 0.27825636  | 0.560529069 |
| ENSMUSG00000044134 | Pheta1        | -0.087219342 | 0.278251119 | 0.560529069 |
| ENSMUSG00000046410 | Kcnk6         | -0.081652613 | 0.27824241  | 0.560529069 |
| ENSMUSG00000024330 | Col11a2       | -0.053135719 | 0.278399827 | 0.560727137 |
| ENSMUSG00000037514 | Pank2         | 0.083411382  | 0.27848581  | 0.560793205 |
| ENSMUSG00000039199 | Zdhhc1        | -0.073587254 | 0.278522928 | 0.560793205 |
| ENSMUSG00000009470 | Tnpo1         | -0.091559619 | 0.278595044 | 0.560847494 |
| ENSMUSG00000022561 | Gpaa1         | -0.08186693  | 0.278838822 | 0.561156353 |
| ENSMUSG00000067365 | Tmem128       | 0.10230421   | 0.27880205  | 0.561156353 |
| ENSMUSG00000037845 | Fdxacb1       | -0.102296254 | 0.278925475 | 0.561239806 |
| ENSMUSG00000056220 | Pla2g4a       | 0.100960343  | 0.278992409 | 0.561283562 |
| ENSMUSG00000022122 | Ednrb         | 0.056492776  | 0.279072824 | 0.561354421 |
| ENSMUSG00000037318 | Traf3ip3      | -0.093284532 | 0.279263817 | 0.561647647 |
| ENSMUSG00000022247 | Brix1         | 0.102636136  | 0.279523856 | 0.561820529 |
| ENSMUSG00000028911 | Srsf4         | -0.084260615 | 0.279546982 | 0.561820529 |
| ENSMUSG00000030008 | Pradc1        | -0.100645769 | 0.279481911 | 0.561820529 |
| ENSMUSG00000031488 | Rab11fip1     | -0.087770341 | 0.279575935 | 0.561820529 |
| ENSMUSG00000094441 | Zfp955a       | -0.101668521 | 0.279463859 | 0.561820529 |
| ENSMUSG00000030921 | Trim30a       | -0.094519802 | 0.279696042 | 0.561921804 |
| ENSMUSG00000036138 | Acaa1a        | 0.100999425  | 0.279762051 | 0.561921804 |
| ENSMUSG00000036376 | Abt1          | 0.09562053   | 0.279749692 | 0.561921804 |
| ENSMUSG00000053158 | Fes           | -0.095461818 | 0.2800288   | 0.56236665  |
| ENSMUSG00000019303 | Psmc3ip       | 0.096768269  | 0.280178285 | 0.562505021 |
| ENSMUSG00000023191 | P3h3          | -0.090518596 | 0.280188275 | 0.562505021 |
| ENSMUSG00000040667 | Nup88         | 0.080991535  | 0.280380147 | 0.562766166 |
| ENSMUSG00000116207 | Nnt           | -0.094063873 | 0.280408969 | 0.562766166 |
| ENSMUSG00000024968 | Rcor2         | 0.035870105  | 0.280512999 | 0.562816792 |
| ENSMUSG00000036299 | BC031181      | 0.092640511  | 0.280524817 | 0.562816792 |

|                    |               |              |             |             |
|--------------------|---------------|--------------|-------------|-------------|
| ENSMUSG00000020877 | Scrn2         | 0.093492561  | 0.280746834 | 0.563171257 |
| ENSMUSG00000044055 | Otos          | 0.093435839  | 0.280988729 | 0.563501544 |
| ENSMUSG00000046223 | Plaur         | -0.095264591 | 0.281002219 | 0.563501544 |
| ENSMUSG00000032221 | Mns1          | 0.093766572  | 0.281509081 | 0.564344275 |
| ENSMUSG00000048930 | Tada3         | -0.100158084 | 0.281568931 | 0.564344275 |
| ENSMUSG00000053830 | Gm9923        | 0.078006711  | 0.281604204 | 0.564344275 |
| ENSMUSG00000055240 | Zfp101        | -0.10060454  | 0.281584803 | 0.564344275 |
| ENSMUSG00000048334 | Gm8258        | 0.021450563  | 0.281773203 | 0.564500798 |
| ENSMUSG00000049339 | Retreg2       | -0.101655599 | 0.281766894 | 0.564500798 |
| ENSMUSG00000029131 | Dnajb6        | 0.096180729  | 0.281964256 | 0.564613702 |
| ENSMUSG00000039842 | Mcph1         | -0.101351739 | 0.281965928 | 0.564613702 |
| ENSMUSG00000048164 | Gm7204        | 0.068049595  | 0.281940999 | 0.564613702 |
| ENSMUSG00000017499 | Cdc6          | -0.090883766 | 0.282196171 | 0.564664481 |
| ENSMUSG00000028850 | Gpatch3       | -0.101667762 | 0.282066939 | 0.564664481 |
| ENSMUSG00000035239 | Neu3          | -0.084631611 | 0.282218589 | 0.564664481 |
| ENSMUSG00000041747 | Utp15         | 0.095975743  | 0.282091947 | 0.564664481 |
| ENSMUSG00000109179 | Gm35339       | -0.056255629 | 0.282137352 | 0.564664481 |
| ENSMUSG00000049907 | Rasl11b       | 0.049845253  | 0.282448012 | 0.564941507 |
| ENSMUSG00000094936 | Rbm4          | -0.100962482 | 0.28240502  | 0.564941507 |
| ENSMUSG00000068101 | Cenpm         | 0.089275275  | 0.282648651 | 0.565251795 |
| ENSMUSG00000029550 | Sppl3         | -0.098387096 | 0.28279306  | 0.565449549 |
| ENSMUSG00000025237 | Parp6         | -0.093500183 | 0.282847506 | 0.565467387 |
| ENSMUSG00000049411 | Tmem241       | -0.100616253 | 0.283050825 | 0.565782797 |
| ENSMUSG00000007670 | Khsrp         | -0.092048259 | 0.283231244 | 0.565880998 |
| ENSMUSG00000028032 | Papss1        | -0.10198164  | 0.283179105 | 0.565880998 |
| ENSMUSG00000035967 | Ints6l        | -0.088689642 | 0.28324549  | 0.565880998 |
| ENSMUSG00000048997 | Atxn7l2       | -0.093402194 | 0.283282187 | 0.565880998 |
| ENSMUSG00000037971 | 1110032A03Rik | -0.098131393 | 0.283410205 | 0.566045692 |
| ENSMUSG00000024939 | Fam89b        | -0.098762452 | 0.283634092 | 0.566203476 |
| ENSMUSG00000031953 | Tmem170       | -0.059333224 | 0.283559247 | 0.566203476 |
| ENSMUSG00000032267 | Usp28         | -0.070682321 | 0.283671543 | 0.566203476 |
| ENSMUSG00000052534 | Pbx1          | 0.041359157  | 0.283615655 | 0.566203476 |
| ENSMUSG00000078193 | Gm2000        | 0.086143149  | 0.283812045 | 0.5663929   |
| ENSMUSG00000025157 | Zdhhc16       | 0.093268565  | 0.283978453 | 0.566451962 |
| ENSMUSG00000030924 | Rexo5         | -0.100433137 | 0.28394839  | 0.566451962 |
| ENSMUSG00000030982 | Vps35l        | -0.101185355 | 0.283902927 | 0.566451962 |
| ENSMUSG00000035152 | Ap2b1         | -0.099519514 | 0.284088013 | 0.566492621 |
| ENSMUSG00000049957 | Ccdc137       | 0.098064652  | 0.284090052 | 0.566492621 |
| ENSMUSG00000022718 | Dgcr8         | -0.085966477 | 0.284730692 | 0.567415961 |
| ENSMUSG00000024163 | Mapk8ip3      | -0.09042039  | 0.28465587  | 0.567415961 |
| ENSMUSG00000025855 | Prkar1b       | -0.075530643 | 0.284735825 | 0.567415961 |
| ENSMUSG00000046572 | Zfp518b       | 0.041568781  | 0.284627898 | 0.567415961 |
| ENSMUSG00000024335 | Brd2          | 0.088691609  | 0.285035422 | 0.567921877 |

|                    |            |              |             |             |
|--------------------|------------|--------------|-------------|-------------|
| ENSMUSG00000022641 | Bbx        | -0.100072205 | 0.285107314 | 0.567974009 |
| ENSMUSG00000021326 | Trim27     | 0.086158593  | 0.285385015 | 0.568177789 |
| ENSMUSG00000025384 | Faap100    | -0.099659155 | 0.285274204 | 0.568177789 |
| ENSMUSG00000027932 | Slc27a3    | -0.058709259 | 0.285392579 | 0.568177789 |
| ENSMUSG00000029635 | Cdk8       | 0.096074408  | 0.285323277 | 0.568177789 |
| ENSMUSG00000025792 | Slc25a10   | -0.091463897 | 0.28548992  | 0.568257451 |
| ENSMUSG00000036790 | Slitrk2    | 0.078825196  | 0.285554577 | 0.568257451 |
| ENSMUSG00000042489 | Clspn      | 0.101810957  | 0.285615592 | 0.568257451 |
| ENSMUSG00000068479 | Mfap1a     | 0.100854422  | 0.285603538 | 0.568257451 |
| ENSMUSG00000014633 | Cmc2       | 0.084773307  | 0.285767312 | 0.568413428 |
| ENSMUSG00000029992 | Gfpt1      | -0.100188812 | 0.285849767 | 0.568413428 |
| ENSMUSG00000054364 | Rhob       | -0.100116061 | 0.285791196 | 0.568413428 |
| ENSMUSG00000059839 | Zfp874b    | -0.063269642 | 0.285920293 | 0.568413428 |
| ENSMUSG00000116393 | LT629153.4 | 0.052472063  | 0.2859228   | 0.568413428 |
| ENSMUSG00000000085 | Scmh1      | -0.09196731  | 0.286234888 | 0.568512065 |
| ENSMUSG00000024740 | Ddb1       | -0.099498199 | 0.286225799 | 0.568512065 |
| ENSMUSG00000030279 | C2cd5      | -0.096514437 | 0.2860489   | 0.568512065 |
| ENSMUSG00000060509 | Xcr1       | -0.04873089  | 0.286247038 | 0.568512065 |
| ENSMUSG00000069300 | Hist1h2bj  | 0.093827393  | 0.286157965 | 0.568512065 |
| ENSMUSG00000112129 | Pbld1      | -0.080950749 | 0.286174861 | 0.568512065 |
| ENSMUSG00000035722 | Abca7      | -0.100591517 | 0.286431181 | 0.568786841 |
| ENSMUSG00000056770 | Setd3      | -0.100531951 | 0.286487865 | 0.568808466 |
| ENSMUSG00000030058 | Copg1      | -0.098015329 | 0.286681988 | 0.568996475 |
| ENSMUSG00000058360 | Gm10040    | 0.056798732  | 0.286719985 | 0.568996475 |
| ENSMUSG00000115662 | Gm7232     | 0.055444632  | 0.286657103 | 0.568996475 |
| ENSMUSG00000027566 | PsmA7      | 0.094467735  | 0.28685381  | 0.569080207 |
| ENSMUSG00000036775 | Decr2      | -0.098055557 | 0.286832553 | 0.569080207 |
| ENSMUSG00000022789 | Dnm1l      | 0.100924982  | 0.286992596 | 0.569264618 |
| ENSMUSG00000021552 | Gkap1      | -0.07539353  | 0.287156266 | 0.56949832  |
| ENSMUSG00000035164 | Zc3h12c    | 0.059519124  | 0.287310296 | 0.569621898 |
| ENSMUSG00000050761 | Gp1bb      | 0.060790817  | 0.287276407 | 0.569621898 |
| ENSMUSG00000029650 | Slc46a3    | 0.079677271  | 0.287405761 | 0.56972023  |
| ENSMUSG00000035824 | Tk2        | -0.100152475 | 0.287599296 | 0.570012902 |
| ENSMUSG00000019810 | Fuca2      | 0.077878363  | 0.287733489 | 0.570158518 |
| ENSMUSG00000021958 | Pinx1      | 0.091613981  | 0.287810475 | 0.570158518 |
| ENSMUSG00000022964 | Tmem50b    | -0.093327442 | 0.287774222 | 0.570158518 |
| ENSMUSG00000083915 | Gm13932    | 0.052837982  | 0.287883347 | 0.570211937 |
| ENSMUSG00000032119 | Hinfp      | -0.097252743 | 0.287939536 | 0.570232299 |
| ENSMUSG00000038217 | Tlcd2      | -0.096299403 | 0.288107722 | 0.570383489 |
| ENSMUSG00000096210 | H1f0       | -0.099993659 | 0.288086273 | 0.570383489 |
| ENSMUSG00000033157 | Abhd10     | 0.099484133  | 0.288273439 | 0.570620618 |
| ENSMUSG00000005469 | Prkaca     | -0.099859335 | 0.288339966 | 0.570661364 |
| ENSMUSG00000023940 | Sgo1       | 0.100092872  | 0.288422761 | 0.570734287 |

|                    |               |              |             |             |
|--------------------|---------------|--------------|-------------|-------------|
| ENSMUSG00000023031 | Cela1         | 0.08765682   | 0.288488938 | 0.570774307 |
| ENSMUSG00000029103 | Lrpap1        | -0.096480955 | 0.288551229 | 0.570806628 |
| ENSMUSG00000021012 | Zc3h14        | -0.079326981 | 0.288878076 | 0.571019913 |
| ENSMUSG00000022369 | Mtbp          | -0.099145921 | 0.288825979 | 0.571019913 |
| ENSMUSG00000027371 | Fahd2a        | -0.099871672 | 0.288719672 | 0.571019913 |
| ENSMUSG00000028689 | Ccdc163       | -0.099187095 | 0.289026825 | 0.571019913 |
| ENSMUSG00000040747 | Cd53          | -0.079392398 | 0.28888189  | 0.571019913 |
| ENSMUSG00000064120 | Mocs1         | -0.098384456 | 0.28898704  | 0.571019913 |
| ENSMUSG00000081251 | Gm12164       | 0.091945013  | 0.28890222  | 0.571019913 |
| ENSMUSG00000091474 | 2610021A01Rik | -0.093004743 | 0.288977509 | 0.571019913 |
| ENSMUSG00000005951 | Shpk          | -0.087911755 | 0.289093489 | 0.571060786 |
| ENSMUSG00000026127 | Imp4          | 0.089890299  | 0.289249104 | 0.571277328 |
| ENSMUSG00000017286 | Glod4         | 0.087033921  | 0.289456598 | 0.571333168 |
| ENSMUSG00000025228 | Actr1a        | -0.098706799 | 0.289400316 | 0.571333168 |
| ENSMUSG00000026833 | Olfm1         | -0.068708309 | 0.289335783 | 0.571333168 |
| ENSMUSG00000036499 | Eea1          | 0.09999608   | 0.289461366 | 0.571333168 |
| ENSMUSG00000083798 | Gm14584       | -0.073552987 | 0.289543519 | 0.57140452  |
| ENSMUSG00000019794 | Katna1        | 0.092518842  | 0.289680542 | 0.571466891 |
| ENSMUSG00000029147 | Ppm1g         | 0.100251846  | 0.289713148 | 0.571466891 |
| ENSMUSG00000053604 | Rpia          | 0.064154367  | 0.289669823 | 0.571466891 |
| ENSMUSG00000032599 | Ip6k2         | -0.095568058 | 0.289853568 | 0.571653092 |
| ENSMUSG00000029178 | Klf3          | -0.099512545 | 0.290010346 | 0.571738659 |
| ENSMUSG00000030424 | Zfp939        | -0.0614302   | 0.29005221  | 0.571738659 |
| ENSMUSG00000040859 | Bsdc1         | -0.073773869 | 0.290080835 | 0.571738659 |
| ENSMUSG00000078963 | Hsbp1l1       | -0.06079368  | 0.290081075 | 0.571738659 |
| ENSMUSG00000020076 | Ddx50         | 0.096699861  | 0.290127135 | 0.571738718 |
| ENSMUSG00000078945 | Naip2         | 0.09795057   | 0.290181093 | 0.571754339 |
| ENSMUSG00000025626 | Phf6          | -0.095627294 | 0.290336247 | 0.571878611 |
| ENSMUSG00000047603 | Zfp235        | -0.09563368  | 0.290334553 | 0.571878611 |
| ENSMUSG00000031146 | Plp2          | 0.098780536  | 0.290505874 | 0.572122001 |
| ENSMUSG00000001313 | Rnd2          | 0.089557319  | 0.290639801 | 0.572218833 |
| ENSMUSG00000113423 | Gm3791        | -0.066832221 | 0.290647179 | 0.572218833 |
| ENSMUSG00000030243 | Recql         | -0.099222063 | 0.290693571 | 0.572219468 |
| ENSMUSG00000000127 | Fer           | 0.082073953  | 0.290828457 | 0.572394274 |
| ENSMUSG00000001785 | Pwp1          | 0.087371807  | 0.291029929 | 0.572484396 |
| ENSMUSG00000024949 | Sf1           | -0.099473933 | 0.291028123 | 0.572484396 |
| ENSMUSG00000033405 | Nudt15        | 0.098491547  | 0.291050051 | 0.572484396 |
| ENSMUSG00000067924 | Rtl8b         | -0.057975394 | 0.291058607 | 0.572484396 |
| ENSMUSG00000005150 | Wdr83         | 0.09221552   | 0.291459986 | 0.572952811 |
| ENSMUSG00000020396 | Nefh          | 0.081360479  | 0.291482572 | 0.572952811 |
| ENSMUSG00000046311 | Zfp62         | -0.098110606 | 0.291452257 | 0.572952811 |
| ENSMUSG00000047822 | Angptl8       | 0.08588646   | 0.291527395 | 0.572952811 |
| ENSMUSG00000056367 | Actr3b        | 0.041155528  | 0.291475203 | 0.572952811 |

|                    |         |              |             |             |
|--------------------|---------|--------------|-------------|-------------|
| ENSMUSG00000027642 | Rpn2    | -0.086872436 | 0.291732834 | 0.573265865 |
| ENSMUSG00000038930 | Rccd1   | -0.070553211 | 0.291843167 | 0.573391961 |
| ENSMUSG00000022876 | Samsn1  | 0.088947789  | 0.292003382 | 0.573616006 |
| ENSMUSG00000022477 | Aco2    | -0.09626171  | 0.29206284  | 0.573642083 |
| ENSMUSG00000004837 | Grap    | 0.090903629  | 0.292239384 | 0.573697768 |
| ENSMUSG00000015340 | Cybb    | -0.099047257 | 0.292259622 | 0.573697768 |
| ENSMUSG00000030774 | Pak1    | -0.088535008 | 0.292229514 | 0.573697768 |
| ENSMUSG00000087598 | Zfp111  | -0.077617537 | 0.292275942 | 0.573697768 |
| ENSMUSG00000002983 | Relb    | -0.061029523 | 0.292561553 | 0.573736648 |
| ENSMUSG00000031010 | Usp9x   | 0.092343489  | 0.292660092 | 0.573736648 |
| ENSMUSG00000039201 | Tbc1d25 | -0.096953534 | 0.292665277 | 0.573736648 |
| ENSMUSG00000039458 | Mtmr12  | -0.086770691 | 0.292626258 | 0.573736648 |
| ENSMUSG00000049728 | Zfp668  | -0.098155694 | 0.292383576 | 0.573736648 |
| ENSMUSG00000050812 | Ecpas   | 0.083773213  | 0.292549388 | 0.573736648 |
| ENSMUSG00000056167 | Cnot10  | -0.096973729 | 0.292591071 | 0.573736648 |
| ENSMUSG00000089832 | Shkbp1  | -0.095332081 | 0.292636059 | 0.573736648 |
| ENSMUSG00000002808 | Epdr1   | -0.068397792 | 0.292909408 | 0.573933342 |
| ENSMUSG00000019297 | Nop9    | 0.084709729  | 0.292934791 | 0.573933342 |
| ENSMUSG00000019773 | Fbxo5   | -0.0837309   | 0.292854645 | 0.573933342 |
| ENSMUSG00000030287 | Itpr2   | -0.062232043 | 0.292950438 | 0.573933342 |
| ENSMUSG00000004789 | Dlst    | 0.099323167  | 0.293005991 | 0.57395165  |
| ENSMUSG00000025572 | Tmc6    | -0.093438331 | 0.293099236 | 0.574043773 |
| ENSMUSG00000033809 | Alg3    | 0.09053515   | 0.29347106  | 0.574508394 |
| ENSMUSG00000074336 | Apoc4   | -0.070920227 | 0.293475224 | 0.574508394 |
| ENSMUSG00000075266 | Cenpw   | 0.091818413  | 0.293473635 | 0.574508394 |
| ENSMUSG00000014426 | Map3k4  | -0.091193364 | 0.293590951 | 0.574644374 |
| ENSMUSG00000040720 | Virma   | 0.079044646  | 0.293960862 | 0.575277749 |
| ENSMUSG00000047557 | Lxn     | -0.09839671  | 0.294083967 | 0.575428002 |
| ENSMUSG00000007029 | Vars    | -0.096436799 | 0.294187567 | 0.575531759 |
| ENSMUSG00000065954 | Tacc1   | 0.100592993  | 0.294229665 | 0.575531759 |
| ENSMUSG00000020528 | Prpsap2 | -0.09738613  | 0.294420204 | 0.575813786 |
| ENSMUSG00000039976 | Tbc1d16 | -0.06272958  | 0.294478375 | 0.575836885 |
| ENSMUSG00000022131 | Gpr180  | -0.095329627 | 0.294712117 | 0.576203244 |
| ENSMUSG00000015748 | Prpf3   | -0.095378853 | 0.295044579 | 0.576390222 |
| ENSMUSG00000022615 | Tymp    | 0.065451343  | 0.295079184 | 0.576390222 |
| ENSMUSG00000024054 | Smchd1  | 0.088318864  | 0.294901601 | 0.576390222 |
| ENSMUSG00000030313 | Dennd5b | -0.098687479 | 0.294868064 | 0.576390222 |
| ENSMUSG00000038527 | C1rl    | -0.096509614 | 0.29500291  | 0.576390222 |
| ENSMUSG00000043953 | Ccrl2   | 0.089018234  | 0.295086178 | 0.576390222 |
| ENSMUSG00000022755 | Adgrg7  | 0.075570579  | 0.295258249 | 0.576544994 |
| ENSMUSG00000041417 | Pik3r1  | -0.096733172 | 0.29525793  | 0.576544994 |
| ENSMUSG00000022389 | Tef     | -0.048208644 | 0.295639381 | 0.576808026 |
| ENSMUSG00000050232 | Cxcr3   | 0.05036591   | 0.29567158  | 0.576808026 |

|                    |               |              |             |             |
|--------------------|---------------|--------------|-------------|-------------|
| ENSMUSG00000066952 | Myo1h         | -0.061064523 | 0.295583039 | 0.576808026 |
| ENSMUSG00000078572 | Ndufaf8       | 0.097998274  | 0.295522412 | 0.576808026 |
| ENSMUSG00000092060 | Bend4         | -0.056980476 | 0.295651853 | 0.576808026 |
| ENSMUSG00000115017 | Gm2573        | 0.081508377  | 0.295508375 | 0.576808026 |
| ENSMUSG00000028530 | Jak1          | 0.100208795  | 0.295781972 | 0.57693277  |
| ENSMUSG00000025019 | Lcor          | 0.095392209  | 0.295889786 | 0.576961857 |
| ENSMUSG00000028717 | Tal1          | 0.079123389  | 0.295887627 | 0.576961857 |
| ENSMUSG00000006784 | Ttc25         | -0.098183968 | 0.296302032 | 0.577129332 |
| ENSMUSG00000013495 | Tmem175       | -0.09530677  | 0.296302146 | 0.577129332 |
| ENSMUSG00000015711 | Prune1        | -0.096234408 | 0.296347386 | 0.577129332 |
| ENSMUSG00000017221 | Psmc3         | 0.083860778  | 0.296217307 | 0.577129332 |
| ENSMUSG00000032477 | Cdc25a        | 0.090481361  | 0.296109721 | 0.577129332 |
| ENSMUSG00000037683 | Armc3         | 0.088053663  | 0.296272706 | 0.577129332 |
| ENSMUSG00000048200 | Cracr2b       | -0.093013606 | 0.296060038 | 0.577129332 |
| ENSMUSG00000058440 | Nrf1          | -0.095649505 | 0.296211054 | 0.577129332 |
| ENSMUSG00000020329 | Polrmt        | -0.097826115 | 0.296514877 | 0.577227216 |
| ENSMUSG00000028955 | Vamp3         | -0.093994907 | 0.2964929   | 0.577227216 |
| ENSMUSG00000035181 | Heatr5a       | 0.089385662  | 0.296537064 | 0.577227216 |
| ENSMUSG00000066894 | Vsig10        | -0.069406094 | 0.296697432 | 0.577448887 |
| ENSMUSG00000029910 | Mad2l1        | 0.095497719  | 0.296849803 | 0.577654928 |
| ENSMUSG00000023873 | 1700010I14Rik | 0.097816896  | 0.297018031 | 0.577710767 |
| ENSMUSG00000032384 | Csnk1g1       | -0.071221422 | 0.296982088 | 0.577710767 |
| ENSMUSG00000055866 | Per2          | 0.037703791  | 0.29698914  | 0.577710767 |
| ENSMUSG00000022000 | Zc3h13        | 0.098113731  | 0.2971335   | 0.577844873 |
| ENSMUSG00000024766 | Lipo3         | -0.095490075 | 0.29725575  | 0.577992121 |
| ENSMUSG00000028576 | Ift74         | 0.096824985  | 0.29734883  | 0.578082614 |
| ENSMUSG00000040722 | Scamp5        | -0.057419094 | 0.297420169 | 0.578130816 |
| ENSMUSG00000023277 | Twf2          | 0.087878033  | 0.297505057 | 0.578205337 |
| ENSMUSG00000015002 | Efr3a         | -0.080334837 | 0.298107428 | 0.578939446 |
| ENSMUSG00000020781 | Tsen54        | -0.090040889 | 0.298137089 | 0.578939446 |
| ENSMUSG00000026277 | Stk25         | -0.097548422 | 0.298018574 | 0.578939446 |
| ENSMUSG00000036537 | Rnf113a1      | 0.096839016  | 0.298162438 | 0.578939446 |
| ENSMUSG00000043733 | Ptpn11        | 0.092949446  | 0.298074592 | 0.578939446 |
| ENSMUSG00000100967 | Gm29666       | -0.097700656 | 0.297962102 | 0.578939446 |
| ENSMUSG00000062101 | Zfp119b       | -0.091442266 | 0.298224792 | 0.578970013 |
| ENSMUSG00000020808 | Pimreg        | -0.096069278 | 0.298458872 | 0.579123882 |
| ENSMUSG00000025421 | Hdhd2         | 0.090926608  | 0.298437671 | 0.579123882 |
| ENSMUSG00000030172 | Erc1          | -0.080868313 | 0.298500472 | 0.579123882 |
| ENSMUSG00000052446 | Zfp961        | 0.097329825  | 0.298537172 | 0.579123882 |
| ENSMUSG00000059395 | Nkapl         | -0.060919227 | 0.298351137 | 0.579123882 |
| ENSMUSG00000049897 | Stkld1        | 0.041045171  | 0.298616566 | 0.579187439 |
| ENSMUSG00000059436 | Max           | -0.048616807 | 0.298914602 | 0.579674985 |
| ENSMUSG00000017288 | Vps53         | 0.090388819  | 0.299014335 | 0.579676891 |

|                    |             |              |             |             |
|--------------------|-------------|--------------|-------------|-------------|
| ENSMUSG00000020882 | Cacnb1      | -0.05898127  | 0.299122538 | 0.579676891 |
| ENSMUSG00000029458 | Brap        | 0.090420766  | 0.299057607 | 0.579676891 |
| ENSMUSG00000031730 | Dhodh       | -0.098026469 | 0.298985409 | 0.579676891 |
| ENSMUSG00000061288 | Taok3       | -0.093413278 | 0.299148931 | 0.579676891 |
| ENSMUSG00000028646 | Rragc       | -0.097500921 | 0.299249519 | 0.579781357 |
| ENSMUSG00000021987 | Mtmr6       | -0.094323698 | 0.299690341 | 0.580454347 |
| ENSMUSG00000024870 | Rab1b       | -0.094311618 | 0.299687915 | 0.580454347 |
| ENSMUSG00000040669 | Phc1        | -0.048826877 | 0.299783797 | 0.58054483  |
| ENSMUSG00000062234 | Gak         | -0.094388634 | 0.300193116 | 0.581156279 |
| ENSMUSG00000081552 | Gm12328     | -0.098563945 | 0.300153562 | 0.581156279 |
| ENSMUSG00000022704 | Qtrt2       | -0.097386543 | 0.30024778  | 0.581171524 |
| ENSMUSG00000032727 | Mier3       | -0.097174331 | 0.300470502 | 0.581512015 |
| ENSMUSG00000021811 | Dnajc9      | -0.09103944  | 0.300791664 | 0.582042881 |
| ENSMUSG00000023039 | Krt7        | -0.065375629 | 0.3010589   | 0.582378539 |
| ENSMUSG00000043251 | Exoc3l      | 0.086342949  | 0.30103286  | 0.582378539 |
| ENSMUSG00000015189 | Casd1       | -0.095693478 | 0.301253907 | 0.582529846 |
| ENSMUSG00000031142 | Cacna1f     | 0.093133752  | 0.301383764 | 0.582529846 |
| ENSMUSG00000042473 | Tbc1d8b     | 0.057019314  | 0.301390493 | 0.582529846 |
| ENSMUSG00000045282 | Tmem86b     | 0.068727074  | 0.30138966  | 0.582529846 |
| ENSMUSG00000045954 | Cavin2      | 0.047832621  | 0.30141851  | 0.582529846 |
| ENSMUSG00000087141 | Plcx2       | -0.08096262  | 0.301251646 | 0.582529846 |
| ENSMUSG00000025374 | Nabp2       | 0.092991814  | 0.301531357 | 0.582657278 |
| ENSMUSG00000006262 | Mob1b       | 0.094560869  | 0.301796747 | 0.583079389 |
| ENSMUSG00000091780 | Sco2        | 0.096816961  | 0.301925203 | 0.583236851 |
| ENSMUSG00000030259 | Rassf8      | 0.061761027  | 0.302093232 | 0.583470694 |
| ENSMUSG00000078902 | Gm14443     | 0.044122764  | 0.302146724 | 0.58348328  |
| ENSMUSG00000034006 | Pqlc1       | -0.096867667 | 0.302461725 | 0.583918401 |
| ENSMUSG00000036078 | Sigmar1     | -0.095289042 | 0.302507292 | 0.583918401 |
| ENSMUSG00000090981 | Olfr718-ps1 | -0.057234343 | 0.302513075 | 0.583918401 |
| ENSMUSG00000027993 | Trim2       | -0.090622785 | 0.302805844 | 0.584392695 |
| ENSMUSG00000066829 | Zfp810      | -0.084232738 | 0.3028959   | 0.584475683 |
| ENSMUSG00000048120 | Entpd1      | -0.082191934 | 0.303023316 | 0.58457415  |
| ENSMUSG00000056493 | Foxk1       | 0.093982025  | 0.303041055 | 0.58457415  |
| ENSMUSG00000021687 | Scamp1      | 0.096540584  | 0.303195717 | 0.584781677 |
| ENSMUSG00000028164 | Manba       | -0.070733909 | 0.303244835 | 0.584785606 |
| ENSMUSG00000028822 | Tmem50a     | 0.078874743  | 0.30331641  | 0.584832837 |
| ENSMUSG00000032381 | Ciao2a      | 0.095127146  | 0.303549996 | 0.585192379 |
| ENSMUSG00000028859 | Csf3r       | -0.096257765 | 0.303776914 | 0.585538959 |
| ENSMUSG00000035992 | Fnip1       | 0.077938135  | 0.303921187 | 0.585726154 |
| ENSMUSG00000020493 | Prr11       | -0.090515042 | 0.304120777 | 0.586017285 |
| ENSMUSG00000020648 | Dus4l       | -0.079037741 | 0.304166608 | 0.586017285 |
| ENSMUSG00000052271 | Bhlha15     | -0.064633181 | 0.304380562 | 0.586338548 |
| ENSMUSG00000022807 | Osbpl11     | -0.095477817 | 0.304450491 | 0.586365659 |

|                    |               |              |             |             |
|--------------------|---------------|--------------|-------------|-------------|
| ENSMUSG00000037375 | Hhat          | -0.058866869 | 0.304509364 | 0.586365659 |
| ENSMUSG00000040624 | Plekhg1       | 0.022198243  | 0.304536258 | 0.586365659 |
| ENSMUSG00000020897 | Aurkb         | -0.088382347 | 0.304594583 | 0.586387061 |
| ENSMUSG00000004070 | Hmox2         | 0.089636582  | 0.304753187 | 0.586510588 |
| ENSMUSG00000029363 | Rfc5          | -0.088974723 | 0.304738557 | 0.586510588 |
| ENSMUSG00000025510 | Cd151         | -0.043715258 | 0.30494379  | 0.586573325 |
| ENSMUSG00000027300 | Ubox5         | -0.095596665 | 0.304908172 | 0.586573325 |
| ENSMUSG00000048040 | Arxes2        | 0.06914054   | 0.304974683 | 0.586573325 |
| ENSMUSG00000071528 | Usmg5         | 0.085613796  | 0.304964546 | 0.586573325 |
| ENSMUSG00000070729 | Gm12966       | 0.046509662  | 0.305037537 | 0.586603382 |
| ENSMUSG00000022838 | Eaf2          | -0.053914932 | 0.305157329 | 0.586742907 |
| ENSMUSG00000033629 | Hacd3         | 0.09573643   | 0.305232845 | 0.58679727  |
| ENSMUSG00000030722 | Nfatc2ip      | 0.082071944  | 0.305301556 | 0.586838536 |
| ENSMUSG00000020290 | Xpo1          | -0.09231097  | 0.305426538 | 0.586897126 |
| ENSMUSG00000032333 | Stoml1        | -0.091114386 | 0.305394231 | 0.586897126 |
| ENSMUSG00000001123 | Lgals9        | 0.083878748  | 0.305580769 | 0.587097829 |
| ENSMUSG00000099775 | Gm5960        | -0.087251022 | 0.305625518 | 0.587097829 |
| ENSMUSG00000048755 | Mcat          | 0.092447371  | 0.305705297 | 0.587160275 |
| ENSMUSG00000000001 | Gnai3         | -0.081196095 | 0.305840072 | 0.58727447  |
| ENSMUSG00000000194 | Gpr107        | -0.089012368 | 0.305900519 | 0.58727447  |
| ENSMUSG00000015605 | Srf           | 0.096133597  | 0.305967933 | 0.58727447  |
| ENSMUSG00000022634 | Yaf2          | 0.090075085  | 0.306001157 | 0.58727447  |
| ENSMUSG00000032897 | Nfyc          | -0.093921164 | 0.305917875 | 0.58727447  |
| ENSMUSG00000027534 | Snx16         | -0.090216631 | 0.306128682 | 0.587337713 |
| ENSMUSG00000028684 | Urod          | 0.091699881  | 0.306115113 | 0.587337713 |
| ENSMUSG00000062082 | Cd200r4       | -0.046322529 | 0.306470697 | 0.587903093 |
| ENSMUSG00000026605 | Cenpf         | -0.095683939 | 0.306721588 | 0.588111892 |
| ENSMUSG00000037594 | Clba1         | -0.067742566 | 0.306711291 | 0.588111892 |
| ENSMUSG00000108366 | Gm5586        | 0.04448241   | 0.306661675 | 0.588111892 |
| ENSMUSG00000038039 | Gcc2          | 0.096169547  | 0.306797769 | 0.588167168 |
| ENSMUSG00000001847 | Rac1          | 0.079339983  | 0.306859667 | 0.588195049 |
| ENSMUSG00000079614 | Seh1l         | 0.088350783  | 0.306945102 | 0.588268031 |
| ENSMUSG00000003752 | Itpkc         | -0.058411134 | 0.307113248 | 0.588408708 |
| ENSMUSG00000047187 | Rab2a         | 0.084634125  | 0.307097498 | 0.588408708 |
| ENSMUSG00000035228 | Ccdc106       | 0.046498714  | 0.307248267 | 0.588576608 |
| ENSMUSG00000063888 | Rpl7l1        | 0.088255352  | 0.307364268 | 0.58870803  |
| ENSMUSG00000049396 | Gemin4        | -0.092240137 | 0.30744561  | 0.588773038 |
| ENSMUSG00000022750 | Klhl22        | -0.091660793 | 0.307566907 | 0.588914529 |
| ENSMUSG00000047150 | 1700001C19Rik | 0.039439227  | 0.307658895 | 0.588999867 |
| ENSMUSG00000007338 | Mrpl49        | 0.09604636   | 0.307820107 | 0.589114994 |
| ENSMUSG00000020444 | Guk1          | 0.096273759  | 0.30782088  | 0.589114994 |
| ENSMUSG00000040040 | Ift88         | 0.093524031  | 0.307861318 | 0.589114994 |
| ENSMUSG00000026887 | Mrrf          | 0.0950176    | 0.308053653 | 0.58939224  |

|                    |               |              |             |             |
|--------------------|---------------|--------------|-------------|-------------|
| ENSMUSG00000034334 | Fam151b       | -0.093732839 | 0.308157721 | 0.589500548 |
| ENSMUSG00000020831 | 0610010K14Rik | 0.08087249   | 0.30839869  | 0.58950756  |
| ENSMUSG00000022429 | Dmc1          | -0.054065671 | 0.30828034  | 0.58950756  |
| ENSMUSG00000024480 | Ap3s1         | 0.105933453  | 0.308303586 | 0.58950756  |
| ENSMUSG00000038894 | Irs2          | -0.094746463 | 0.308358942 | 0.58950756  |
| ENSMUSG00000051412 | Vamp7         | 0.091605021  | 0.308357095 | 0.58950756  |
| ENSMUSG00000054770 | Kctd18        | -0.079410722 | 0.308524825 | 0.589657924 |
| ENSMUSG00000020814 | Mxra7         | -0.055074431 | 0.308634265 | 0.589763254 |
| ENSMUSG00000031832 | Taf1c         | -0.078996154 | 0.308709117 | 0.589763254 |
| ENSMUSG00000046707 | Csnk2a2       | 0.097287585  | 0.30872238  | 0.589763254 |
| ENSMUSG00000000530 | Acvrl1        | -0.053139499 | 0.308841729 | 0.589900526 |
| ENSMUSG00000025494 | Sigirr        | -0.094943135 | 0.30893122  | 0.589980733 |
| ENSMUSG00000004356 | Utp20         | 0.060417625  | 0.309173962 | 0.590172088 |
| ENSMUSG00000027075 | Slc43a1       | -0.091597231 | 0.309140467 | 0.590172088 |
| ENSMUSG00000111446 | Gm6581        | 0.093900277  | 0.309139924 | 0.590172088 |
| ENSMUSG00000090637 | Gm6189        | -0.0851983   | 0.309295116 | 0.590312636 |
| ENSMUSG00000000058 | Cav2          | 0.080113089  | 0.309506718 | 0.590521365 |
| ENSMUSG00000021669 | Col4a3bp      | -0.093544598 | 0.309572697 | 0.590521365 |
| ENSMUSG00000028608 | 0610037L13Rik | 0.089712595  | 0.309594648 | 0.590521365 |
| ENSMUSG00000114367 | Gm48216       | 0.074527729  | 0.309496185 | 0.590521365 |
| ENSMUSG00000026927 | Entr1         | -0.091350675 | 0.309819356 | 0.590677854 |
| ENSMUSG00000043683 | Fem1a         | -0.094094047 | 0.309737793 | 0.590677854 |
| ENSMUSG00000068962 | Zfp114        | -0.073627868 | 0.309785505 | 0.590677854 |
| ENSMUSG00000005125 | Ndrg1         | -0.07094202  | 0.310176205 | 0.590832765 |
| ENSMUSG00000018740 | Slc25a35      | -0.07871903  | 0.310213565 | 0.590832765 |
| ENSMUSG00000030768 | Disp1         | -0.084478925 | 0.310219024 | 0.590832765 |
| ENSMUSG00000034064 | Poglut1       | -0.083153861 | 0.31023358  | 0.590832765 |
| ENSMUSG00000036442 | Thap11        | -0.093092713 | 0.310051832 | 0.590832765 |
| ENSMUSG00000048416 | Mlf1          | 0.056556408  | 0.310050953 | 0.590832765 |
| ENSMUSG00000104882 | Gm43096       | 0.069754759  | 0.310228413 | 0.590832765 |
| ENSMUSG00000050002 | Idnk          | 0.091235894  | 0.310284336 | 0.590838838 |
| ENSMUSG00000039069 | Mtg2          | -0.084943888 | 0.310475145 | 0.591111553 |
| ENSMUSG00000005413 | Hmox1         | -0.070939826 | 0.3106627   | 0.591131378 |
| ENSMUSG00000024975 | Pdcd4         | 0.094427052  | 0.310639712 | 0.591131378 |
| ENSMUSG00000029826 | Zc3hav1       | -0.092862116 | 0.310675922 | 0.591131378 |
| ENSMUSG00000042348 | Arl15         | 0.08705747   | 0.310540646 | 0.591131378 |
| ENSMUSG00000018433 | Nol11         | 0.080969535  | 0.311071546 | 0.591657264 |
| ENSMUSG00000020111 | Micu1         | -0.091378453 | 0.311161633 | 0.591657264 |
| ENSMUSG00000021738 | Atxn7         | -0.078628106 | 0.311136296 | 0.591657264 |
| ENSMUSG00000030870 | Ubfd1         | 0.088762529  | 0.311190476 | 0.591657264 |
| ENSMUSG00000052632 | Asap2         | -0.042551075 | 0.311153275 | 0.591657264 |
| ENSMUSG00000023307 | March5        | 0.07840903   | 0.311429774 | 0.592021613 |
| ENSMUSG00000027680 | Fxr1          | 0.087505174  | 0.311737599 | 0.592036531 |

|                    |               |              |             |             |
|--------------------|---------------|--------------|-------------|-------------|
| ENSMUSG00000028282 | Casp8ap2      | 0.093743701  | 0.31166132  | 0.592036531 |
| ENSMUSG00000029064 | Gnb1          | -0.08735638  | 0.311605835 | 0.592036531 |
| ENSMUSG00000031148 | Gpkow         | -0.086132951 | 0.31177127  | 0.592036531 |
| ENSMUSG00000042719 | Naa25         | 0.095097157  | 0.311624985 | 0.592036531 |
| ENSMUSG00000054387 | Mdm4          | 0.095419719  | 0.311731533 | 0.592036531 |
| ENSMUSG00000064193 | Gm4735        | 0.07507316   | 0.311553933 | 0.592036531 |
| ENSMUSG00000040212 | Emp3          | -0.092451279 | 0.311900629 | 0.59219164  |
| ENSMUSG00000002748 | Baz1b         | 0.094892934  | 0.312297155 | 0.592842542 |
| ENSMUSG00000060639 | Hist1h4i      | 0.093863683  | 0.312338909 | 0.592842542 |
| ENSMUSG00000074781 | Ube2n         | 0.088229098  | 0.312527115 | 0.593109136 |
| ENSMUSG00000037098 | Rab11fip3     | -0.059295313 | 0.312590331 | 0.593138482 |
| ENSMUSG00000006169 | Clint1        | -0.077729939 | 0.31277078  | 0.593150351 |
| ENSMUSG00000029204 | Rhoh          | 0.094410436  | 0.312787602 | 0.593150351 |
| ENSMUSG00000032026 | Rexo2         | 0.086646778  | 0.312753512 | 0.593150351 |
| ENSMUSG00000040054 | Baz2a         | 0.094453732  | 0.31267096  | 0.593150351 |
| ENSMUSG00000024309 | Pfdn6         | 0.093851279  | 0.312875999 | 0.593227412 |
| ENSMUSG00000004788 | Eif2b2        | 0.085901115  | 0.313380622 | 0.593640492 |
| ENSMUSG00000024350 | Dnajc18       | -0.093340725 | 0.313168151 | 0.593640492 |
| ENSMUSG00000025154 | Arhgap19      | -0.094306797 | 0.313359771 | 0.593640492 |
| ENSMUSG00000028436 | Dcaf12        | -0.083038335 | 0.313352151 | 0.593640492 |
| ENSMUSG00000041313 | Slc7a1        | -0.086672423 | 0.313365584 | 0.593640492 |
| ENSMUSG00000045248 | Med26         | -0.093220594 | 0.313312966 | 0.593640492 |
| ENSMUSG00000036282 | Naa30         | 0.0947077    | 0.31345584  | 0.593692434 |
| ENSMUSG00000019370 | Calm3         | 0.086666937  | 0.313572796 | 0.593732881 |
| ENSMUSG00000052214 | Opa3          | -0.088453384 | 0.313535557 | 0.593732881 |
| ENSMUSG00000062604 | Srpk2         | 0.093652942  | 0.313721104 | 0.593923157 |
| ENSMUSG00000116358 | Gm49450       | -0.089681232 | 0.31381553  | 0.594011383 |
| ENSMUSG00000027088 | Phospho2      | -0.092939167 | 0.314052523 | 0.594369402 |
| ENSMUSG00000057335 | Cep170        | -0.091468229 | 0.31428554  | 0.594719788 |
| ENSMUSG00000003813 | Rad23a        | -0.095902596 | 0.3144692   | 0.594825924 |
| ENSMUSG00000027194 | Ttc17         | -0.081789881 | 0.314575875 | 0.594825924 |
| ENSMUSG00000062939 | Stat4         | -0.091287747 | 0.314562256 | 0.594825924 |
| ENSMUSG00000081738 | Hmgb1-ps2     | 0.038891843  | 0.314581072 | 0.594825924 |
| ENSMUSG00000101439 | Gm336         | -0.091106422 | 0.314445279 | 0.594825924 |
| ENSMUSG00000051169 | Rpusd3        | 0.08955936   | 0.314701505 | 0.594872529 |
| ENSMUSG00000116953 | 9030025P20Rik | 0.093696671  | 0.314679648 | 0.594872529 |
| ENSMUSG00000046111 | Cep295        | 0.08359065   | 0.314761512 | 0.594895427 |
| ENSMUSG00000072774 | Zfp951        | -0.091955989 | 0.314832809 | 0.594939651 |
| ENSMUSG00000074576 | Mocs3         | -0.085722734 | 0.31488451  | 0.594946837 |
| ENSMUSG00000045573 | Penk          | 0.08218574   | 0.314965844 | 0.59501     |
| ENSMUSG00000072763 | 5430403G16Rik | -0.089722243 | 0.315186584 | 0.59533646  |
| ENSMUSG00000000346 | Dazap2        | -0.100665314 | 0.31527366  | 0.595410389 |
| ENSMUSG00000024696 | Lpxn          | -0.092900398 | 0.315348954 | 0.595462049 |

|                    |               |              |             |             |
|--------------------|---------------|--------------|-------------|-------------|
| ENSMUSG00000039033 | Tasp1         | 0.089385925  | 0.315449028 | 0.595560477 |
| ENSMUSG00000036989 | Trim3         | -0.077659246 | 0.315570418 | 0.595699112 |
| ENSMUSG00000066721 | Zfp575        | -0.065696311 | 0.315634134 | 0.595728853 |
| ENSMUSG00000020102 | Slc16a7       | -0.079998989 | 0.315873642 | 0.595867371 |
| ENSMUSG00000022179 | 4931414P19Rik | -0.07513237  | 0.316043333 | 0.595867371 |
| ENSMUSG00000027852 | Nras          | 0.094191263  | 0.31592211  | 0.595867371 |
| ENSMUSG00000029177 | Cenpa         | 0.081182449  | 0.316002514 | 0.595867371 |
| ENSMUSG00000033658 | Ddx19b        | 0.092723772  | 0.316032244 | 0.595867371 |
| ENSMUSG00000051343 | Rab11fip5     | -0.053472053 | 0.315816713 | 0.595867371 |
| ENSMUSG00000075312 | Gm13597       | -0.092471473 | 0.3158364   | 0.595867371 |
| ENSMUSG00000058997 | Vwa8          | 0.094132947  | 0.316178119 | 0.596031024 |
| ENSMUSG00000090592 | Gm17571       | -0.057387295 | 0.316368611 | 0.596299622 |
| ENSMUSG00000082382 | Gm14970       | -0.093387346 | 0.316419502 | 0.596305058 |
| ENSMUSG00000027883 | Gpsm2         | -0.084427683 | 0.316556248 | 0.596472263 |
| ENSMUSG00000026718 | Stam          | 0.092949598  | 0.316750823 | 0.596748365 |
| ENSMUSG00000032096 | Arcn1         | -0.092670674 | 0.317165145 | 0.597438318 |
| ENSMUSG00000030613 | Ccdc90b       | 0.084480651  | 0.317220056 | 0.597451148 |
| ENSMUSG00000019907 | Ppp1r12a      | 0.07728385   | 0.317271159 | 0.597456802 |
| ENSMUSG00000033009 | Ogfod1        | 0.092629358  | 0.317455847 | 0.597713972 |
| ENSMUSG00000014164 | Klhl3         | -0.084039772 | 0.317964639 | 0.598490495 |
| ENSMUSG00000029217 | Tec           | -0.090305093 | 0.317945451 | 0.598490495 |
| ENSMUSG00000024780 | Cdc37l1       | 0.093719343  | 0.318118484 | 0.598689347 |
| ENSMUSG00000029171 | Pgm2          | 0.0875176    | 0.318279781 | 0.598720757 |
| ENSMUSG00000038331 | Satb2         | 0.047261008  | 0.318241279 | 0.598720757 |
| ENSMUSG00000039246 | Lyplal1       | 0.073641518  | 0.318199842 | 0.598720757 |
| ENSMUSG00000002524 | Puf60         | -0.086312382 | 0.318654675 | 0.599335209 |
| ENSMUSG00000117345 | AC163399.1    | 0.034395536  | 0.3187071   | 0.599343057 |
| ENSMUSG00000009073 | Nf2           | -0.092098544 | 0.318826407 | 0.599385924 |
| ENSMUSG00000066441 | Rdh11         | -0.090015094 | 0.318799306 | 0.599385924 |
| ENSMUSG00000021280 | Exoc3l4       | 0.065369353  | 0.319112691 | 0.599427714 |
| ENSMUSG00000026643 | Nmt2          | 0.090945014  | 0.319138191 | 0.599427714 |
| ENSMUSG00000029110 | Rnf4          | -0.090088363 | 0.319120246 | 0.599427714 |
| ENSMUSG00000030583 | Sipa1l3       | -0.064334874 | 0.319019555 | 0.599427714 |
| ENSMUSG00000059422 | Gm8116        | 0.08648382   | 0.318934924 | 0.599427714 |
| ENSMUSG00000083019 | Gm6222        | 0.034087431  | 0.319054075 | 0.599427714 |
| ENSMUSG00000055053 | Nfic          | -0.088137724 | 0.319192434 | 0.599438952 |
| ENSMUSG00000022884 | Eif4a2        | -0.09076705  | 0.319275989 | 0.599505225 |
| ENSMUSG00000026036 | Nif3l1        | 0.093433135  | 0.319422935 | 0.599674968 |
| ENSMUSG00000027067 | Ssrp1         | -0.090497652 | 0.319511226 | 0.599674968 |
| ENSMUSG00000030357 | Fkbp4         | 0.08108004   | 0.319470909 | 0.599674968 |
| ENSMUSG00000043311 | D17H6S53E     | 0.037662669  | 0.319599062 | 0.599749198 |
| ENSMUSG00000036707 | Cab39         | 0.088300188  | 0.319664938 | 0.599782205 |
| ENSMUSG00000041530 | Ago1          | 0.056077576  | 0.319747868 | 0.599847194 |

|                    |         |              |             |             |
|--------------------|---------|--------------|-------------|-------------|
| ENSMUSG00000031377 | Bmx     | 0.090790425  | 0.319886233 | 0.599992076 |
| ENSMUSG00000047789 | Slc38a9 | -0.087753849 | 0.319921707 | 0.599992076 |
| ENSMUSG00000031904 | Slc7a6  | 0.092693379  | 0.320101741 | 0.600239089 |
| ENSMUSG00000042613 | Pbxip1  | -0.084211185 | 0.320423961 | 0.60066194  |
| ENSMUSG00000046949 | Nqo2    | 0.086081644  | 0.320423737 | 0.60066194  |
| ENSMUSG00000032462 | Pik3cb  | 0.093239632  | 0.320536087 | 0.600781459 |
| ENSMUSG00000032469 | Dbr1    | -0.079580899 | 0.320683623 | 0.600967303 |
| ENSMUSG00000024970 | Spindoc | -0.089175486 | 0.320758518 | 0.600972063 |
| ENSMUSG00000027160 | Ccdc34  | 0.083382194  | 0.32078293  | 0.600972063 |
| ENSMUSG00000022674 | Ube2v2  | 0.090902036  | 0.320955246 | 0.60120421  |
| ENSMUSG00000037583 | Nr0b2   | 0.092366152  | 0.32103433  | 0.601261672 |
| ENSMUSG00000082622 | Gm12632 | 0.052372036  | 0.321092104 | 0.601279213 |
| ENSMUSG00000025759 | Mfsd8   | -0.087363131 | 0.321186781 | 0.601365843 |
| ENSMUSG00000021501 | Caml    | -0.091090747 | 0.321282546 | 0.601454485 |
| ENSMUSG00000030745 | Ii21r   | 0.092222921  | 0.321393142 | 0.601511143 |
| ENSMUSG00000113072 | Gm47820 | 0.06184986   | 0.321409665 | 0.601511143 |
| ENSMUSG00000024045 | Akap8   | -0.07866449  | 0.321506068 | 0.601600915 |
| ENSMUSG00000003153 | Slc2a3  | -0.06614798  | 0.321712054 | 0.601708529 |
| ENSMUSG00000026791 | Slc2a8  | -0.081355952 | 0.321638265 | 0.601708529 |
| ENSMUSG00000030717 | Nupr1   | 0.0756673    | 0.321727874 | 0.601708529 |
| ENSMUSG00000044452 | Zfp507  | -0.047338733 | 0.321757351 | 0.601708529 |
| ENSMUSG00000026663 | Atf6    | 0.089604313  | 0.32193465  | 0.601949463 |
| ENSMUSG00000021273 | Fdft1   | -0.083717395 | 0.322027064 | 0.602031632 |
| ENSMUSG00000038028 | Tigar   | 0.091980611  | 0.322356016 | 0.602523507 |
| ENSMUSG00000050244 | Heatr1  | 0.038698258  | 0.322387185 | 0.602523507 |
| ENSMUSG00000061186 | Sfmbt2  | 0.035928139  | 0.322443158 | 0.602537455 |
| ENSMUSG00000040616 | Tmem51  | -0.05316716  | 0.32251653  | 0.602583908 |
| ENSMUSG00000038503 | Mesd    | 0.085444335  | 0.32264413  | 0.602657072 |
| ENSMUSG00000115039 | Gm7043  | 0.056697346  | 0.322652728 | 0.602657072 |
| ENSMUSG00000025470 | Zfp511  | 0.092325728  | 0.322980107 | 0.603177854 |
| ENSMUSG00000007739 | Cct4    | 0.087012256  | 0.323051083 | 0.603219709 |
| ENSMUSG00000030917 | Tmem159 | -0.090934528 | 0.323115476 | 0.603221809 |
| ENSMUSG00000039697 | Ncoa7   | 0.091906125  | 0.323149337 | 0.603221809 |
| ENSMUSG00000032718 | Mansc1  | -0.055179627 | 0.323268095 | 0.603319516 |
| ENSMUSG00000039801 | Cplane1 | -0.065794513 | 0.323298824 | 0.603319516 |
| ENSMUSG00000009863 | Sdhb    | 0.088855015  | 0.323364076 | 0.603350636 |
| ENSMUSG00000055065 | Ddx17   | 0.084120733  | 0.323487877 | 0.603490977 |
| ENSMUSG00000021619 | Atg10   | 0.091410337  | 0.323804807 | 0.60371953  |
| ENSMUSG00000023852 | Chd1    | 0.089112418  | 0.323729687 | 0.60371953  |
| ENSMUSG00000049791 | Fzd4    | 0.054256288  | 0.323776471 | 0.60371953  |
| ENSMUSG00000096458 | Moap1   | -0.091219586 | 0.323794038 | 0.60371953  |
| ENSMUSG00000024869 | Gm49405 | -0.056234822 | 0.323875942 | 0.603761531 |
| ENSMUSG00000004500 | Zfp324  | -0.07121701  | 0.323962439 | 0.603812783 |

|                    |               |              |             |             |
|--------------------|---------------|--------------|-------------|-------------|
| ENSMUSG00000048807 | Slc35e4       | -0.089593035 | 0.32400066  | 0.603812783 |
| ENSMUSG00000062901 | Klhl24        | -0.089453832 | 0.324264023 | 0.604212936 |
| ENSMUSG00000074170 | Plekhf1       | 0.092320989  | 0.324320997 | 0.604228454 |
| ENSMUSG00000036980 | Taf6          | -0.091507533 | 0.324377542 | 0.604243169 |
| ENSMUSG00000067017 | Gm3608        | 0.088783169  | 0.32450601  | 0.604391835 |
| ENSMUSG00000085603 | Gm11346       | -0.071772533 | 0.324743788 | 0.604744016 |
| ENSMUSG00000020694 | Tlk2          | 0.089910201  | 0.324825941 | 0.604806327 |
| ENSMUSG00000010538 | Tsacc         | -0.090935479 | 0.324933965 | 0.604826133 |
| ENSMUSG00000029414 | Kntc1         | -0.088920991 | 0.324917699 | 0.604826133 |
| ENSMUSG00000020620 | Abca8b        | -0.053284755 | 0.325103632 | 0.605051275 |
| ENSMUSG00000091264 | Smim13        | 0.092015635  | 0.325170513 | 0.605085085 |
| ENSMUSG00000026525 | Opn3          | 0.07575596   | 0.3254814   | 0.605572869 |
| ENSMUSG00000030041 | M1ap          | 0.089072955  | 0.325682403 | 0.605674671 |
| ENSMUSG00000031834 | Pik3r2        | -0.082678282 | 0.325681917 | 0.605674671 |
| ENSMUSG00000074909 | Ranbp6        | -0.091419199 | 0.325619023 | 0.605674671 |
| ENSMUSG00000059776 | Rpl13-ps6     | 0.050132372  | 0.325736378 | 0.605684365 |
| ENSMUSG00000018882 | Mrpl45        | 0.09167982   | 0.325874842 | 0.605851132 |
| ENSMUSG00000051550 | Zfp579        | -0.080552694 | 0.325934636 | 0.605871613 |
| ENSMUSG00000018286 | Psmb6         | 0.096150351  | 0.326313314 | 0.606414588 |
| ENSMUSG00000051650 | B3gnt2        | -0.08996303  | 0.326324378 | 0.606414588 |
| ENSMUSG00000021671 | Poc5          | -0.090133101 | 0.326648079 | 0.606925324 |
| ENSMUSG00000020653 | Klf11         | -0.05543354  | 0.326767387 | 0.607056194 |
| ENSMUSG00000028309 | Rnf20         | 0.075267691  | 0.326905839 | 0.607222585 |
| ENSMUSG00000020954 | Strn3         | -0.088952141 | 0.327004395 | 0.607268933 |
| ENSMUSG00000024219 | Anks1         | -0.09134513  | 0.327077463 | 0.607268933 |
| ENSMUSG00000027176 | Cstf3         | 0.082673935  | 0.32704711  | 0.607268933 |
| ENSMUSG00000028664 | Ephb2         | 0.04526159   | 0.327265718 | 0.607436863 |
| ENSMUSG00000029782 | Tmem209       | -0.0869193   | 0.327216941 | 0.607436863 |
| ENSMUSG00000068329 | Htra2         | 0.086965897  | 0.327320297 | 0.607447394 |
| ENSMUSG00000001910 | Nacc1         | -0.083235605 | 0.327496439 | 0.607501981 |
| ENSMUSG00000022960 | Donson        | -0.091071523 | 0.327479042 | 0.607501981 |
| ENSMUSG00000058729 | Lin9          | -0.089498488 | 0.327454532 | 0.607501981 |
| ENSMUSG00000020459 | Mtif2         | 0.090811521  | 0.32773198  | 0.60760814  |
| ENSMUSG00000022035 | Ccdc25        | 0.079855372  | 0.327682615 | 0.60760814  |
| ENSMUSG00000032485 | Scap          | -0.065144711 | 0.327749339 | 0.60760814  |
| ENSMUSG00000105835 | Gm43552       | -0.090129105 | 0.327624537 | 0.60760814  |
| ENSMUSG00000003269 | Cyth2         | -0.089154961 | 0.328237325 | 0.60833446  |
| ENSMUSG00000052005 | Gm9864        | 0.064160994  | 0.328239075 | 0.60833446  |
| ENSMUSG00000028577 | Plaa          | 0.08123845   | 0.328388607 | 0.608339283 |
| ENSMUSG00000039233 | Tbce          | -0.08543109  | 0.3283505   | 0.608339283 |
| ENSMUSG00000054666 | Olfr63        | -0.090677225 | 0.328349914 | 0.608339283 |
| ENSMUSG00000028757 | Ddost         | 0.075341457  | 0.32844595  | 0.608354778 |
| ENSMUSG00000049881 | 2810025M15Rik | 0.085699272  | 0.328604897 | 0.608558435 |

|                    |               |              |             |             |
|--------------------|---------------|--------------|-------------|-------------|
| ENSMUSG00000022450 | Ndufa6        | 0.087303992  | 0.328800015 | 0.60873826  |
| ENSMUSG00000075227 | Znhit2        | 0.080754125  | 0.328797745 | 0.60873826  |
| ENSMUSG00000028948 | Nol9          | 0.089869879  | 0.328955449 | 0.608912685 |
| ENSMUSG00000070572 | Trmt112-ps2   | 0.079120389  | 0.328992274 | 0.608912685 |
| ENSMUSG00000028937 | Acot7         | -0.090400276 | 0.329078155 | 0.608980895 |
| ENSMUSG00000057143 | Trim12c       | 0.081726727  | 0.329215617 | 0.609053795 |
| ENSMUSG00000069008 | Gm5537        | 0.024109684  | 0.329209084 | 0.609053795 |
| ENSMUSG00000020752 | Recql5        | -0.074536643 | 0.329467767 | 0.609338764 |
| ENSMUSG00000040621 | Gemin8        | 0.085484881  | 0.329421386 | 0.609338764 |
| ENSMUSG00000091350 | Vmn2r92       | 0.052425129  | 0.329572605 | 0.609441912 |
| ENSMUSG00000032060 | Cryab         | -0.034530503 | 0.329708244 | 0.609601979 |
| ENSMUSG00000022781 | Pak2          | 0.091036378  | 0.329830035 | 0.609645665 |
| ENSMUSG00000028578 | Caap1         | 0.084379527  | 0.329805754 | 0.609645665 |
| ENSMUSG00000042208 | O610010F05Rik | 0.088049774  | 0.329894255 | 0.609673641 |
| ENSMUSG00000018401 | Mtmt4         | -0.076462355 | 0.329957528 | 0.60969986  |
| ENSMUSG00000027809 | Etfdh         | -0.089030664 | 0.330042289 | 0.609765769 |
| ENSMUSG00000021764 | Ndufs4        | 0.074429366  | 0.330242476 | 0.609868119 |
| ENSMUSG00000024587 | Nars          | 0.080681332  | 0.330331239 | 0.609868119 |
| ENSMUSG00000030598 | Fbxo17        | 0.081481003  | 0.33018961  | 0.609868119 |
| ENSMUSG00000041298 | Katnal1       | 0.086063614  | 0.330343186 | 0.609868119 |
| ENSMUSG00000056004 | 9330182L06Rik | -0.043905594 | 0.330251927 | 0.609868119 |
| ENSMUSG00000047180 | Neur13        | 0.090004541  | 0.330430514 | 0.609938685 |
| ENSMUSG00000072772 | Grc10         | -0.084662688 | 0.330569008 | 0.610103662 |
| ENSMUSG00000000157 | Itgb2l        | -0.05381878  | 0.330816649 | 0.610363771 |
| ENSMUSG00000029265 | Dr1           | -0.085394386 | 0.331025877 | 0.610363771 |
| ENSMUSG00000029466 | Anapc7        | 0.089257257  | 0.331053919 | 0.610363771 |
| ENSMUSG00000037679 | Inf2          | -0.078807399 | 0.331024789 | 0.610363771 |
| ENSMUSG00000042632 | Pla2g6        | -0.079517738 | 0.330780559 | 0.610363771 |
| ENSMUSG00000043432 | Leng9         | -0.085708003 | 0.330921276 | 0.610363771 |
| ENSMUSG00000051977 | Prdm9         | 0.060643558  | 0.331011857 | 0.610363771 |
| ENSMUSG00000025260 | Hsd17b10      | 0.086071216  | 0.331348384 | 0.610794062 |
| ENSMUSG00000029524 | Sirt4         | -0.090043129 | 0.331411856 | 0.610794062 |
| ENSMUSG00000096699 | Rps19-ps4     | 0.046186309  | 0.331434826 | 0.610794062 |
| ENSMUSG00000105156 | Gm9057        | 0.040406348  | 0.331579639 | 0.610970286 |
| ENSMUSG00000032000 | Birc3         | -0.090096732 | 0.33171123  | 0.611122099 |
| ENSMUSG00000025532 | Crcp          | 0.089071261  | 0.331804432 | 0.611203152 |
| ENSMUSG00000024892 | Pcx           | 0.04515592   | 0.332107424 | 0.611579884 |
| ENSMUSG00000058883 | Zfp708        | -0.049034276 | 0.332062435 | 0.611579884 |
| ENSMUSG00000019948 | Actr6         | 0.090715466  | 0.332314724 | 0.611716724 |
| ENSMUSG00000021114 | Atp6v1d       | 0.07826813   | 0.332378727 | 0.611716724 |
| ENSMUSG00000024758 | Rtn3          | 0.082086005  | 0.332290593 | 0.611716724 |
| ENSMUSG00000026471 | Mr1           | -0.0629025   | 0.33234864  | 0.611716724 |
| ENSMUSG00000002250 | Ppard         | -0.049864819 | 0.333085076 | 0.611760661 |

|                    |               |              |             |             |
|--------------------|---------------|--------------|-------------|-------------|
| ENSMUSG00000015837 | Sqstm1        | 0.084531716  | 0.333126284 | 0.611760661 |
| ENSMUSG00000020863 | Luc7l3        | 0.083311135  | 0.333141383 | 0.611760661 |
| ENSMUSG00000025503 | Taldo1        | 0.066742446  | 0.332677293 | 0.611760661 |
| ENSMUSG00000026222 | Sp100         | -0.09007584  | 0.33259572  | 0.611760661 |
| ENSMUSG00000028252 | Ccnc          | 0.08821223   | 0.332725369 | 0.611760661 |
| ENSMUSG00000039989 | Cbx4          | -0.089197577 | 0.333139419 | 0.611760661 |
| ENSMUSG00000040124 | Gorab         | -0.083128422 | 0.332937844 | 0.611760661 |
| ENSMUSG00000041594 | Tmtc4         | -0.062708601 | 0.332538088 | 0.611760661 |
| ENSMUSG00000042423 | Fbrs          | -0.076562506 | 0.333047929 | 0.611760661 |
| ENSMUSG00000058258 | Idi1          | 0.087723378  | 0.333010867 | 0.611760661 |
| ENSMUSG00000066568 | Lsm14a        | -0.087079204 | 0.332999099 | 0.611760661 |
| ENSMUSG00000072494 | Ppp1r3e       | 0.049129773  | 0.333037574 | 0.611760661 |
| ENSMUSG00000096687 | Mfsd4b4       | -0.060188028 | 0.332837326 | 0.611760661 |
| ENSMUSG00000112222 | Tyms-ps       | 0.045046981  | 0.332652362 | 0.611760661 |
| ENSMUSG00000000916 | Nsun5         | -0.085006443 | 0.33334002  | 0.611783378 |
| ENSMUSG00000002833 | Hdgfl2        | 0.08707032   | 0.333313164 | 0.611783378 |
| ENSMUSG00000096385 | Gm11168       | -0.027046671 | 0.333326951 | 0.611783378 |
| ENSMUSG00000107443 | Gm7468        | 0.047728613  | 0.333350769 | 0.611783378 |
| ENSMUSG00000026270 | Capn10        | -0.088301829 | 0.33342132  | 0.611822457 |
| ENSMUSG00000029598 | Plbd2         | -0.081664016 | 0.333960529 | 0.612721379 |
| ENSMUSG00000070031 | Sp140         | 0.090303988  | 0.334060548 | 0.612814365 |
| ENSMUSG00000021451 | Sema4d        | -0.081223691 | 0.334189197 | 0.612959838 |
| ENSMUSG00000078881 | Gm14434       | -0.064590446 | 0.334307875 | 0.613086981 |
| ENSMUSG00000038936 | Sccpdh        | -0.08613985  | 0.334419441 | 0.613201044 |
| ENSMUSG00000022831 | Hcls1         | -0.075703539 | 0.334555264 | 0.613299626 |
| ENSMUSG00000116085 | AC117188.2    | -0.034980644 | 0.334571956 | 0.613299626 |
| ENSMUSG00000028407 | Smim27        | -0.088851642 | 0.334782557 | 0.613595122 |
| ENSMUSG00000031365 | Zfp275        | 0.052102778  | 0.334852037 | 0.613631919 |
| ENSMUSG00000031255 | Sytl4         | -0.054353791 | 0.334936339 | 0.613695864 |
| ENSMUSG00000042699 | Dhx9          | 0.081076646  | 0.335008859 | 0.613738205 |
| ENSMUSG00000014907 | Naf1          | 0.070235578  | 0.335226755 | 0.613775629 |
| ENSMUSG00000022280 | Rnf19a        | -0.089526696 | 0.33521293  | 0.613775629 |
| ENSMUSG00000028224 | Nbn           | -0.083005021 | 0.335226944 | 0.613775629 |
| ENSMUSG00000059482 | 2610301B20Rik | -0.089155476 | 0.335097216 | 0.613775629 |
| ENSMUSG00000025903 | Lypla1        | 0.089360215  | 0.335359269 | 0.613927411 |
| ENSMUSG00000020105 | Lrig3         | 0.049290833  | 0.335476637 | 0.614051769 |
| ENSMUSG00000005087 | Cd44          | 0.083880766  | 0.33570427  | 0.614287381 |
| ENSMUSG00000041777 | Cir1          | 0.088050306  | 0.335679404 | 0.614287381 |
| ENSMUSG00000032311 | Nrg4          | -0.088772574 | 0.336074938 | 0.614875064 |
| ENSMUSG00000045045 | Lrfn4         | -0.057471991 | 0.336218597 | 0.615047303 |
| ENSMUSG00000041406 | BC055324      | -0.089280412 | 0.33634007  | 0.615178915 |
| ENSMUSG00000020485 | Supt4a        | 0.076458931  | 0.336471515 | 0.615257077 |
| ENSMUSG00000020521 | Rnft1         | -0.088770774 | 0.336779073 | 0.615257077 |

|                    |          |              |             |             |
|--------------------|----------|--------------|-------------|-------------|
| ENSMUSG00000024976 | Shoc2    | -0.087409431 | 0.336644177 | 0.615257077 |
| ENSMUSG00000028970 | Abcb1b   | 0.088090675  | 0.336669607 | 0.615257077 |
| ENSMUSG00000029462 | Vps29    | 0.090636608  | 0.336606725 | 0.615257077 |
| ENSMUSG00000030729 | Pgm2l1   | -0.078692373 | 0.336503365 | 0.615257077 |
| ENSMUSG00000050957 | Insl6    | 0.065459755  | 0.336727215 | 0.615257077 |
| ENSMUSG00000091277 | Gm1818   | -0.023234848 | 0.336774481 | 0.615257077 |
| ENSMUSG00000041477 | Dcp1b    | -0.086747805 | 0.336842046 | 0.615281625 |
| ENSMUSG00000059355 | Wdr83os  | 0.076797178  | 0.337025523 | 0.615454358 |
| ENSMUSG00000067321 | Gm7931   | 0.061056311  | 0.337035709 | 0.615454358 |
| ENSMUSG00000019768 | Esr1     | -0.087896919 | 0.337097968 | 0.615477564 |
| ENSMUSG00000005533 | Igf1r    | 0.072639613  | 0.337529582 | 0.616175036 |
| ENSMUSG00000036087 | Slain2   | -0.087947772 | 0.337751085 | 0.616488792 |
| ENSMUSG00000000552 | Zfp385a  | -0.076957661 | 0.337862824 | 0.616602137 |
| ENSMUSG00000050050 | Ccdc158  | -0.051703977 | 0.338135292 | 0.616918105 |
| ENSMUSG00000062038 | Gm10108  | 0.096097318  | 0.338120113 | 0.616918105 |
| ENSMUSG00000025324 | Atp10a   | -0.084313804 | 0.338219675 | 0.616935427 |
| ENSMUSG00000095865 | Gm13237  | 0.089549392  | 0.338244124 | 0.616935427 |
| ENSMUSG00000029145 | Eif2b4   | 0.083307701  | 0.338591147 | 0.617477704 |
| ENSMUSG00000023272 | Creld2   | 0.091265708  | 0.338659408 | 0.617511525 |
| ENSMUSG00000023094 | Msrb2    | 0.088929778  | 0.339175115 | 0.617998255 |
| ENSMUSG00000026965 | Anapc2   | -0.085999017 | 0.338989947 | 0.617998255 |
| ENSMUSG00000031480 | Thsd1    | -0.056451561 | 0.339100825 | 0.617998255 |
| ENSMUSG00000034205 | Loxl2    | -0.082767921 | 0.339132696 | 0.617998255 |
| ENSMUSG00000036503 | Rnf13    | -0.086991036 | 0.339150085 | 0.617998255 |
| ENSMUSG00000039814 | Xkr5     | -0.070004247 | 0.339245508 | 0.618035854 |
| ENSMUSG00000031833 | Mast3    | -0.082463453 | 0.339496183 | 0.618401831 |
| ENSMUSG00000014980 | Tsen15   | 0.09009919   | 0.339681653 | 0.618648947 |
| ENSMUSG00000061666 | Gdpd1    | 0.044430548  | 0.34005143  | 0.61923161  |
| ENSMUSG00000032435 | Dync1li1 | 0.083720658  | 0.34013902  | 0.619300317 |
| ENSMUSG00000014867 | Surf4    | 0.07603939   | 0.34021983  | 0.619356662 |
| ENSMUSG00000027351 | Spred1   | 0.087337661  | 0.340378658 | 0.619464221 |
| ENSMUSG00000050079 | Rspry1   | -0.082716496 | 0.340372581 | 0.619464221 |
| ENSMUSG00000052085 | Dock8    | -0.087498473 | 0.340625868 | 0.619823309 |
| ENSMUSG00000028899 | Taf12    | 0.085300557  | 0.340685713 | 0.6198414   |
| ENSMUSG00000036249 | Rbm43    | 0.086590128  | 0.340751335 | 0.619869996 |
| ENSMUSG00000035834 | Polr3g   | 0.088053758  | 0.34087411  | 0.620002537 |
| ENSMUSG00000027109 | Sp3      | -0.08690776  | 0.340982496 | 0.62010887  |
| ENSMUSG00000041147 | Brca2    | -0.083423917 | 0.341227355 | 0.620463326 |
| ENSMUSG00000017802 | Retreg3  | -0.069444959 | 0.341578882 | 0.621011607 |
| ENSMUSG00000002325 | Irf9     | -0.045987361 | 0.341665371 | 0.621046066 |
| ENSMUSG00000083396 | Gm15542  | -0.08650508  | 0.341697836 | 0.621046066 |
| ENSMUSG00000025479 | Cyp2e1   | -0.054270708 | 0.342005194 | 0.621513754 |
| ENSMUSG00000020741 | Cluh     | 0.085432775  | 0.342484721 | 0.62207206  |

|                    |               |              |             |             |
|--------------------|---------------|--------------|-------------|-------------|
| ENSMUSG00000031170 | Slc38a5       | -0.0273667   | 0.342634993 | 0.62207206  |
| ENSMUSG00000045377 | Tmem88        | -0.053109555 | 0.342614969 | 0.62207206  |
| ENSMUSG00000047423 | Al837181      | -0.08791037  | 0.342586306 | 0.62207206  |
| ENSMUSG00000054723 | Vmac          | -0.055729563 | 0.342574074 | 0.62207206  |
| ENSMUSG00000057236 | Rbbp4         | 0.070302035  | 0.342662993 | 0.62207206  |
| ENSMUSG00000109925 | Gm45315       | 0.084513502  | 0.342514853 | 0.62207206  |
| ENSMUSG00000031311 | Nono          | -0.082221012 | 0.342725964 | 0.622095456 |
| ENSMUSG00000091239 | Vmn2r76       | 0.068121249  | 0.342782201 | 0.622106622 |
| ENSMUSG00000020440 | Arf5          | -0.087512298 | 0.343258009 | 0.622643493 |
| ENSMUSG00000023832 | Acat2         | -0.087706311 | 0.343176491 | 0.622643493 |
| ENSMUSG00000030663 | 1110004F10Rik | 0.087368239  | 0.343278532 | 0.622643493 |
| ENSMUSG00000036501 | Fam13b        | -0.086235288 | 0.343186038 | 0.622643493 |
| ENSMUSG00000034652 | Cd300a        | -0.087864604 | 0.343358687 | 0.622697949 |
| ENSMUSG00000028066 | Pmf1          | 0.074724054  | 0.34383773  | 0.622748388 |
| ENSMUSG00000028496 | Mllt3         | -0.079490837 | 0.343751093 | 0.622748388 |
| ENSMUSG00000033628 | Pik3c3        | -0.086176014 | 0.34363766  | 0.622748388 |
| ENSMUSG00000033857 | Engase        | -0.082325995 | 0.343714653 | 0.622748388 |
| ENSMUSG00000037075 | Rnf139        | -0.087503425 | 0.343462157 | 0.622748388 |
| ENSMUSG00000042229 | Rabif         | -0.080568824 | 0.343746598 | 0.622748388 |
| ENSMUSG00000046329 | Slc25a23      | -0.067912612 | 0.343732474 | 0.622748388 |
| ENSMUSG00000069270 | Hist1h2ac     | 0.05325274   | 0.3436885   | 0.622748388 |
| ENSMUSG00000116563 | AL731706.2    | 0.087535141  | 0.343823077 | 0.622748388 |
| ENSMUSG00000026771 | Spopl         | 0.079097538  | 0.34391684  | 0.622752594 |
| ENSMUSG00000037138 | Aff3          | -0.045107248 | 0.343940326 | 0.622752594 |
| ENSMUSG00000028558 | Calr4         | -0.047818808 | 0.344047853 | 0.622765721 |
| ENSMUSG00000113926 | Gm3565        | 0.045961313  | 0.344045962 | 0.622765721 |
| ENSMUSG00000020788 | Atp2a3        | -0.081276542 | 0.344309583 | 0.623148671 |
| ENSMUSG00000022214 | Dcaf11        | -0.086354979 | 0.344410073 | 0.623148946 |
| ENSMUSG00000022881 | Rfc4          | 0.085741341  | 0.344378164 | 0.623148946 |
| ENSMUSG00000041958 | Pigs          | -0.08583049  | 0.344468362 | 0.623163636 |
| ENSMUSG00000050022 | Amz1          | 0.067134152  | 0.344658316 | 0.623325705 |
| ENSMUSG00000053094 | Tmem248       | 0.083342857  | 0.344634536 | 0.623325705 |
| ENSMUSG00000022129 | Dct           | -0.057954556 | 0.344898133 | 0.623415878 |
| ENSMUSG00000022941 | Ripply3       | -0.063336111 | 0.344908938 | 0.623415878 |
| ENSMUSG00000025204 | Ndufb8        | 0.088030637  | 0.344850083 | 0.623415878 |
| ENSMUSG00000030515 | Tarsl2        | 0.086818996  | 0.344864391 | 0.623415878 |
| ENSMUSG00000025278 | Flnb          | 0.061941424  | 0.345233871 | 0.623912397 |
| ENSMUSG00000038784 | Cnot4         | -0.085575755 | 0.345342885 | 0.624018617 |
| ENSMUSG00000021258 | Ccnk          | 0.055904858  | 0.345453447 | 0.624127603 |
| ENSMUSG00000025044 | Msr1          | 0.052224096  | 0.345666256 | 0.624421258 |
| ENSMUSG00000021371 | Mcur1         | 0.085370973  | 0.345901736 | 0.624574133 |
| ENSMUSG00000059182 | Skap2         | 0.085086003  | 0.345854177 | 0.624574133 |
| ENSMUSG00000071532 | Gm10335       | 0.071144406  | 0.345885422 | 0.624574133 |

|                    |               |              |             |             |
|--------------------|---------------|--------------|-------------|-------------|
| ENSMUSG00000047977 | Synb          | 0.051324293  | 0.346008956 | 0.624676925 |
| ENSMUSG00000113198 | Gm6988        | -0.060008552 | 0.346118591 | 0.624784046 |
| ENSMUSG00000053173 | Rpl18-ps2     | 0.044356106  | 0.34625296  | 0.624935776 |
| ENSMUSG00000028793 | Rnf19b        | 0.086854467  | 0.346393397 | 0.625098414 |
| ENSMUSG00000003865 | Gys1          | -0.087292304 | 0.346513421 | 0.625111046 |
| ENSMUSG00000022305 | Lrp12         | -0.058177946 | 0.346601704 | 0.625111046 |
| ENSMUSG00000033114 | Slc35d2       | -0.078747699 | 0.346600865 | 0.625111046 |
| ENSMUSG00000041498 | Kif14         | -0.046660131 | 0.346463323 | 0.625111046 |
| ENSMUSG00000075327 | Zbtb2         | -0.08672526  | 0.346697741 | 0.625193473 |
| ENSMUSG00000022621 | Rabl2         | 0.078054705  | 0.346940343 | 0.625449347 |
| ENSMUSG00000042046 | Dstyk         | -0.082298322 | 0.346928543 | 0.625449347 |
| ENSMUSG00000021484 | Lman2         | 0.088690319  | 0.347010615 | 0.625485249 |
| ENSMUSG00000029833 | Trim24        | -0.074929654 | 0.347220612 | 0.625507106 |
| ENSMUSG00000037280 | Galnt6        | -0.087052467 | 0.347224177 | 0.625507106 |
| ENSMUSG00000039771 | Polr2j        | 0.083963688  | 0.347215993 | 0.625507106 |
| ENSMUSG00000051225 | Fam83a        | -0.056621407 | 0.347127817 | 0.625507106 |
| ENSMUSG00000024897 | Apba1         | -0.081025323 | 0.347275726 | 0.625509251 |
| ENSMUSG00000006021 | Kptn          | -0.085918716 | 0.347997419 | 0.625813796 |
| ENSMUSG00000009733 | Tfcp2         | -0.085554176 | 0.347808555 | 0.625813796 |
| ENSMUSG00000024127 | Prepl         | -0.086510493 | 0.347966395 | 0.625813796 |
| ENSMUSG00000025485 | Ric8a         | -0.085922422 | 0.347694889 | 0.625813796 |
| ENSMUSG00000025531 | Chm           | 0.065529908  | 0.347833413 | 0.625813796 |
| ENSMUSG00000052760 | A630001G21Rik | -0.086898775 | 0.347957885 | 0.625813796 |
| ENSMUSG00000062116 | Zfp954        | -0.086393145 | 0.347999025 | 0.625813796 |
| ENSMUSG00000070708 | Gtsf1l        | 0.05783944   | 0.347740859 | 0.625813796 |
| ENSMUSG00000073792 | Alg6          | -0.083425991 | 0.347651217 | 0.625813796 |
| ENSMUSG00000075705 | Msrb1         | -0.085348917 | 0.347974654 | 0.625813796 |
| ENSMUSG00000082088 | Gm15753       | 0.051013183  | 0.347871672 | 0.625813796 |
| ENSMUSG00000023460 | Rab12         | -0.084326162 | 0.348093132 | 0.625892414 |
| ENSMUSG00000021876 | Rnase4        | 0.080078912  | 0.348228076 | 0.626044425 |
| ENSMUSG00000090231 | Cfb           | 0.045376607  | 0.348304755 | 0.626091659 |
| ENSMUSG00000025240 | Sacm1l        | -0.075542832 | 0.348567103 | 0.626381942 |
| ENSMUSG00000027829 | Ccnl1         | -0.073755314 | 0.34856353  | 0.626381942 |
| ENSMUSG00000031835 | Mbtps1        | -0.084483564 | 0.348664624 | 0.626466555 |
| ENSMUSG00000021928 | Ebpl          | 0.084861103  | 0.349233776 | 0.627398428 |
| ENSMUSG00000032279 | ldh3a         | 0.089033885  | 0.349395501 | 0.627416729 |
| ENSMUSG00000049904 | Tmem17        | 0.08504031   | 0.349350776 | 0.627416729 |
| ENSMUSG00000070526 | Peg12         | -0.042594022 | 0.349371392 | 0.627416729 |
| ENSMUSG00000029464 | Gpn3          | 0.083720793  | 0.34956119  | 0.627623524 |
| ENSMUSG00000033712 | Ccar2         | -0.086217549 | 0.349748809 | 0.627869628 |
| ENSMUSG00000027811 | 4930579G24Rik | -0.083318693 | 0.349847196 | 0.627955494 |
| ENSMUSG00000007041 | Clic1         | -0.071619285 | 0.350086441 | 0.628037745 |
| ENSMUSG00000018169 | Mfng          | -0.081019423 | 0.350239946 | 0.628037745 |

|                    |               |              |             |             |
|--------------------|---------------|--------------|-------------|-------------|
| ENSMUSG00000027184 | Caprin1       | 0.086545544  | 0.350246958 | 0.628037745 |
| ENSMUSG00000055200 | Sertad3       | -0.086315849 | 0.350204628 | 0.628037745 |
| ENSMUSG00000057110 | Cntrl         | 0.086607018  | 0.350069321 | 0.628037745 |
| ENSMUSG00000080994 | Gm13464       | 0.030679241  | 0.349976656 | 0.628037745 |
| ENSMUSG00000098113 | Gm2445        | 0.04062403   | 0.350108847 | 0.628037745 |
| ENSMUSG00000020057 | Dram1         | 0.085869985  | 0.350318859 | 0.628076002 |
| ENSMUSG00000001783 | Rtcb          | 0.082309817  | 0.350370769 | 0.628078413 |
| ENSMUSG00000013858 | Tmem259       | -0.086453836 | 0.350666571 | 0.628278128 |
| ENSMUSG00000021703 | Serinc5       | -0.069203988 | 0.35060443  | 0.628278128 |
| ENSMUSG00000025860 | Xiap          | -0.07805247  | 0.350542942 | 0.628278128 |
| ENSMUSG00000048332 | Lhfp          | -0.050929367 | 0.350684507 | 0.628278128 |
| ENSMUSG00000074282 | Zfp94         | -0.083347837 | 0.350835464 | 0.62836731  |
| ENSMUSG00000082420 | Gm6517        | 0.04335188   | 0.350805798 | 0.62836731  |
| ENSMUSG00000000253 | Gmpr          | 0.080449559  | 0.350960045 | 0.62839153  |
| ENSMUSG00000038143 | Stox2         | -0.057656829 | 0.351044516 | 0.62839153  |
| ENSMUSG00000063439 | B9d2          | 0.081654622  | 0.351051351 | 0.62839153  |
| ENSMUSG00000097327 | E030030I06Rik | -0.076807394 | 0.351030775 | 0.62839153  |
| ENSMUSG00000072066 | 6720489N17Rik | -0.06782611  | 0.351151459 | 0.628480155 |
| ENSMUSG00000020458 | Rtn4          | -0.081018342 | 0.351320026 | 0.628600697 |
| ENSMUSG00000020541 | Tom1l1        | 0.086020566  | 0.351286485 | 0.628600697 |
| ENSMUSG00000053128 | Rnf26         | -0.084984264 | 0.351428926 | 0.628704982 |
| ENSMUSG00000026576 | Atp1b1        | -0.072513864 | 0.351749873 | 0.629165071 |
| ENSMUSG00000030610 | Det1          | -0.07905557  | 0.35178741  | 0.629165071 |
| ENSMUSG00000022024 | Sugt1         | 0.079351678  | 0.351929668 | 0.629319545 |
| ENSMUSG00000031158 | Timm17b       | 0.070062585  | 0.351975113 | 0.629319545 |
| ENSMUSG00000052681 | Rap1b         | 0.086191925  | 0.352191227 | 0.629615318 |
| ENSMUSG00000028821 | Syf2          | -0.08061035  | 0.352322208 | 0.629668223 |
| ENSMUSG00000108218 | Olf1372-ps1   | -0.067399887 | 0.352322012 | 0.629668223 |
| ENSMUSG00000029624 | Ptcd1         | -0.081623055 | 0.352406046 | 0.629727449 |
| ENSMUSG00000092558 | Med20         | -0.079292475 | 0.352631028 | 0.630038838 |
| ENSMUSG00000107283 | Mpv17         | -0.084327641 | 0.352840322 | 0.630322112 |
| ENSMUSG00000028565 | Nfia          | -0.04513585  | 0.353514144 | 0.631435027 |
| ENSMUSG00000015357 | Clpx          | -0.082619041 | 0.353620264 | 0.63153376  |
| ENSMUSG00000029559 | 2210016L21Rik | 0.077542284  | 0.353731922 | 0.631594215 |
| ENSMUSG00000115238 | Gm19236       | -0.075114664 | 0.353755813 | 0.631594215 |
| ENSMUSG00000080186 | Gm14448       | 0.083472067  | 0.353978268 | 0.631900555 |
| ENSMUSG00000003378 | Grik5         | -0.067420345 | 0.354194647 | 0.632195964 |
| ENSMUSG00000030760 | Acer3         | -0.077046365 | 0.354356633 | 0.632366478 |
| ENSMUSG00000041000 | Trim62        | -0.051315639 | 0.354392002 | 0.632366478 |
| ENSMUSG00000009291 | Pttg1ip       | -0.076913644 | 0.354491385 | 0.632452958 |
| ENSMUSG00000026546 | Cfap45        | -0.052011531 | 0.354579063 | 0.632506463 |
| ENSMUSG00000035632 | Cnot3         | -0.0847313   | 0.35462322  | 0.632506463 |
| ENSMUSG00000002342 | Tmem161a      | 0.073194893  | 0.354946748 | 0.632540851 |

|                    |               |              |             |             |
|--------------------|---------------|--------------|-------------|-------------|
| ENSMUSG00000020652 | Cenpo         | -0.081859247 | 0.354889816 | 0.632540851 |
| ENSMUSG00000022180 | Slc7a8        | -0.054642482 | 0.354780564 | 0.632540851 |
| ENSMUSG00000025326 | Ube3a         | 0.084255402  | 0.354979085 | 0.632540851 |
| ENSMUSG00000026708 | Cenpl         | -0.083034625 | 0.354998975 | 0.632540851 |
| ENSMUSG00000029687 | Ezh2          | -0.067119127 | 0.354909836 | 0.632540851 |
| ENSMUSG00000117284 | CT030661.1    | -0.085184142 | 0.354921785 | 0.632540851 |
| ENSMUSG00000042389 | Tsen2         | -0.082892645 | 0.355075778 | 0.632586953 |
| ENSMUSG00000022770 | Dlg1          | -0.085819632 | 0.355474119 | 0.632984701 |
| ENSMUSG00000031865 | Dctn1         | -0.078738509 | 0.355542478 | 0.632984701 |
| ENSMUSG00000038236 | Hoxa7         | 0.085639528  | 0.355604802 | 0.632984701 |
| ENSMUSG00000045822 | Zswim3        | -0.085164487 | 0.355369693 | 0.632984701 |
| ENSMUSG00000059821 | Olfr847       | -0.063900199 | 0.355536217 | 0.632984701 |
| ENSMUSG00000071477 | Zfp777        | -0.069131796 | 0.355570666 | 0.632984701 |
| ENSMUSG00000032475 | Nck1          | 0.080776407  | 0.35628196  | 0.634008341 |
| ENSMUSG00000045128 | Rpl18a        | 0.063303677  | 0.356267663 | 0.634008341 |
| ENSMUSG00000068923 | Syt11         | -0.068714248 | 0.35633983  | 0.634020488 |
| ENSMUSG00000061119 | Prcp          | -0.081105279 | 0.356632076 | 0.634449586 |
| ENSMUSG00000021706 | Zfyve16       | -0.080233494 | 0.356811599 | 0.634678058 |
| ENSMUSG00000027778 | Ift80         | -0.050874396 | 0.356971263 | 0.634871142 |
| ENSMUSG00000061778 | Mospd2        | -0.082531901 | 0.357063423 | 0.634944134 |
| ENSMUSG00000015839 | Nfe2l2        | -0.073377424 | 0.357137483 | 0.634984924 |
| ENSMUSG00000005882 | Uqcc1         | -0.083449734 | 0.357220248 | 0.635041177 |
| ENSMUSG00000031539 | Ap3m2         | 0.08073076   | 0.357405848 | 0.63516805  |
| ENSMUSG00000040774 | Cept1         | -0.075791604 | 0.357387435 | 0.63516805  |
| ENSMUSG00000096916 | Zfp850        | -0.064892872 | 0.357445026 | 0.63516805  |
| ENSMUSG00000006273 | Atp6v1b2      | -0.084473476 | 0.357611449 | 0.635372881 |
| ENSMUSG00000015478 | Rnf5          | -0.067138014 | 0.357761878 | 0.635549241 |
| ENSMUSG00000031467 | Agpat5        | 0.07526223   | 0.357911308 | 0.635652456 |
| ENSMUSG00000034601 | 2700049A03Rik | -0.08476918  | 0.357922331 | 0.635652456 |
| ENSMUSG00000024063 | Lbh           | -0.082378927 | 0.357993579 | 0.635688099 |
| ENSMUSG00000094347 | Olfr784       | 0.063552494  | 0.35809718  | 0.635781172 |
| ENSMUSG00000115196 | Gm6212        | 0.02761925   | 0.358187333 | 0.635850345 |
| ENSMUSG00000002289 | Angptl4       | 0.08460526   | 0.359571017 | 0.636599506 |
| ENSMUSG00000008301 | Phax          | 0.074389625  | 0.3592214   | 0.636599506 |
| ENSMUSG00000021213 | Akr1c13       | -0.084629354 | 0.359248969 | 0.636599506 |
| ENSMUSG00000021662 | Arhgef28      | 0.076034913  | 0.358851057 | 0.636599506 |
| ENSMUSG00000027905 | Ddx20         | -0.084305    | 0.35867728  | 0.636599506 |
| ENSMUSG00000028033 | Kcnq5         | -0.065259506 | 0.358925689 | 0.636599506 |
| ENSMUSG00000028563 | Tm2d1         | -0.082169002 | 0.359575954 | 0.636599506 |
| ENSMUSG00000029499 | Pxmp2         | -0.084057497 | 0.358956121 | 0.636599506 |
| ENSMUSG00000029828 | 4921507P07Rik | 0.051620285  | 0.359391187 | 0.636599506 |
| ENSMUSG00000031012 | Cask          | -0.074418658 | 0.358867219 | 0.636599506 |
| ENSMUSG00000032827 | Ppp1r9a       | 0.033930586  | 0.358954883 | 0.636599506 |

|                    |          |              |             |             |
|--------------------|----------|--------------|-------------|-------------|
| ENSMUSG00000036959 | Bcor1    | -0.063113933 | 0.359634388 | 0.636599506 |
| ENSMUSG00000036977 | Anapc10  | 0.083447009  | 0.359539356 | 0.636599506 |
| ENSMUSG00000037331 | Larp1    | 0.081807219  | 0.359024838 | 0.636599506 |
| ENSMUSG00000040824 | Snrpd2   | 0.084660192  | 0.359199883 | 0.636599506 |
| ENSMUSG00000046324 | Ermp1    | -0.0826363   | 0.35927407  | 0.636599506 |
| ENSMUSG00000048109 | Rbm15    | -0.084006327 | 0.359510173 | 0.636599506 |
| ENSMUSG00000053470 | Kdm3a    | -0.073580828 | 0.358993163 | 0.636599506 |
| ENSMUSG00000054545 | Ugt1a6a  | 0.04660319   | 0.359591717 | 0.636599506 |
| ENSMUSG00000070372 | Capza1   | -0.083815011 | 0.359403321 | 0.636599506 |
| ENSMUSG00000036613 | Eipr1    | -0.084750145 | 0.359743127 | 0.63670125  |
| ENSMUSG00000027201 | Myef2    | 0.078386528  | 0.359837033 | 0.636776718 |
| ENSMUSG00000105103 | Gm43191  | -0.070608484 | 0.359898015 | 0.636793909 |
| ENSMUSG00000037148 | Arhgap10 | -0.083191918 | 0.359962934 | 0.63681806  |
| ENSMUSG00000043870 | Gm5809   | 0.035830552  | 0.360179975 | 0.636839212 |
| ENSMUSG00000050350 | Gpr18    | -0.050396497 | 0.360170166 | 0.636839212 |
| ENSMUSG00000058835 | Abi1     | -0.078110027 | 0.360122618 | 0.636839212 |
| ENSMUSG00000069117 | Gm10260  | 0.071739352  | 0.360042847 | 0.636839212 |
| ENSMUSG00000003746 | Man1a    | -0.083068001 | 0.360267841 | 0.636903907 |
| ENSMUSG00000048174 | Tmem81   | 0.040642126  | 0.360346763 | 0.636952774 |
| ENSMUSG00000031189 | Aff2     | 0.059012641  | 0.360447684 | 0.637040507 |
| ENSMUSG00000032612 | Usp4     | -0.082611142 | 0.360581296 | 0.637109746 |
| ENSMUSG00000039615 | Stub1    | 0.070991309  | 0.360589446 | 0.637109746 |
| ENSMUSG00000043424 | Eif3j2   | 0.068314168  | 0.360671949 | 0.637164881 |
| ENSMUSG00000017716 | Birc5    | 0.070134412  | 0.360892735 | 0.637192418 |
| ENSMUSG00000028229 | Rmdn1    | 0.084685577  | 0.360802913 | 0.637192418 |
| ENSMUSG00000031024 | St5      | 0.035793714  | 0.360883286 | 0.637192418 |
| ENSMUSG00000083816 | Gm13033  | -0.058510879 | 0.360832289 | 0.637192418 |
| ENSMUSG00000024078 | Ttc27    | 0.081870829  | 0.361033498 | 0.637350352 |
| ENSMUSG00000023927 | Satb1    | 0.080554805  | 0.361109426 | 0.637393802 |
| ENSMUSG00000029012 | Orc5     | -0.08420753  | 0.361296939 | 0.637634169 |
| ENSMUSG00000011306 | Sugp1    | -0.079331605 | 0.361548848 | 0.637988101 |
| ENSMUSG00000026617 | Bpnt1    | 0.083401525  | 0.361893186 | 0.638264169 |
| ENSMUSG00000039542 | Ncam1    | 0.078619281  | 0.36191084  | 0.638264169 |
| ENSMUSG00000042213 | Zfand4   | -0.073458941 | 0.361846614 | 0.638264169 |
| ENSMUSG00000071180 | Smim15   | 0.080707163  | 0.361884227 | 0.638264169 |
| ENSMUSG00000022889 | Mrpl39   | 0.079774607  | 0.362127209 | 0.63828325  |
| ENSMUSG00000038812 | Trmt112  | 0.075372868  | 0.36210602  | 0.63828325  |
| ENSMUSG00000062997 | Rpl35    | 0.076744307  | 0.36208249  | 0.63828325  |
| ENSMUSG00000073406 | H2-BI    | -0.072608219 | 0.361983894 | 0.63828325  |
| ENSMUSG00000029922 | Mkrn1    | -0.0837306   | 0.362357214 | 0.638570527 |
| ENSMUSG00000031681 | Smad1    | -0.084106459 | 0.362393015 | 0.638570527 |
| ENSMUSG00000071074 | Yipf3    | 0.085882883  | 0.362547928 | 0.63866592  |
| ENSMUSG00000071451 | Psmg4    | 0.072391162  | 0.362549988 | 0.63866592  |

|                    |               |              |             |             |
|--------------------|---------------|--------------|-------------|-------------|
| ENSMUSG0000003360  | Ddx23         | 0.084067254  | 0.362951198 | 0.638672152 |
| ENSMUSG00000019763 | Rmnd1         | -0.081950162 | 0.362912111 | 0.638672152 |
| ENSMUSG00000020287 | Mpg           | 0.084315706  | 0.36284809  | 0.638672152 |
| ENSMUSG00000020303 | Stc2          | 0.040479016  | 0.362650732 | 0.638672152 |
| ENSMUSG00000024781 | Lipa          | -0.083877208 | 0.362990677 | 0.638672152 |
| ENSMUSG00000027951 | Adar          | -0.072262034 | 0.363053767 | 0.638672152 |
| ENSMUSG00000033356 | Pus7l         | 0.072704747  | 0.362974295 | 0.638672152 |
| ENSMUSG00000036275 | 9530068E07Rik | -0.074481526 | 0.363018769 | 0.638672152 |
| ENSMUSG00000040302 | Rbm48         | -0.083770445 | 0.363067713 | 0.638672152 |
| ENSMUSG00000083992 | Gm11478       | 0.035643057  | 0.362856237 | 0.638672152 |
| ENSMUSG00000020474 | Polm          | -0.067340653 | 0.36312454  | 0.638681664 |
| ENSMUSG00000028690 | Mmachc        | 0.07999715   | 0.363269506 | 0.638792199 |
| ENSMUSG00000052040 | Klf13         | -0.079500341 | 0.363290242 | 0.638792199 |
| ENSMUSG00000036395 | Glb1l2        | -0.050470163 | 0.363400457 | 0.638805133 |
| ENSMUSG00000038180 | Spag4         | -0.07592333  | 0.363378993 | 0.638805133 |
| ENSMUSG00000078153 | Psme2b        | -0.039456782 | 0.363694689 | 0.639141445 |
| ENSMUSG00000096433 | Zfp994        | -0.083190884 | 0.363653189 | 0.639141445 |
| ENSMUSG00000038708 | Golga4        | -0.08216754  | 0.363770229 | 0.639183763 |
| ENSMUSG00000020718 | Polg2         | -0.081996374 | 0.364158775 | 0.639775976 |
| ENSMUSG00000026018 | Ica1l         | -0.033221371 | 0.364226018 | 0.639803617 |
| ENSMUSG00000027323 | Rad51         | -0.074132048 | 0.36449022  | 0.64008667  |
| ENSMUSG00000034218 | Atm           | 0.062038215  | 0.364446859 | 0.64008667  |
| ENSMUSG00000024981 | Acsl5         | -0.078637664 | 0.364597815 | 0.640185109 |
| ENSMUSG00000021482 | Aaed1         | 0.080650797  | 0.364687752 | 0.640252518 |
| ENSMUSG00000027327 | 1700037H04Rik | 0.076732045  | 0.364765999 | 0.640299388 |
| ENSMUSG00000027961 | Lrrc39        | 0.053346851  | 0.364928758 | 0.640494574 |
| ENSMUSG00000019942 | Cdk1          | 0.077667785  | 0.365051429 | 0.640614546 |
| ENSMUSG00000043085 | Tmem82        | -0.052456754 | 0.365100263 | 0.640614546 |
| ENSMUSG00000030037 | Mrpl53        | 0.081415893  | 0.365153716 | 0.640617839 |
| ENSMUSG00000010142 | Tnfrsf13b     | -0.083423994 | 0.365596428 | 0.640851209 |
| ENSMUSG00000020610 | Amz2          | -0.076553022 | 0.365523831 | 0.640851209 |
| ENSMUSG00000029422 | Rsrc2         | 0.083473231  | 0.365348995 | 0.640851209 |
| ENSMUSG00000033386 | Frrs1         | -0.082287843 | 0.365637962 | 0.640851209 |
| ENSMUSG00000036985 | Zdhhc9        | -0.083464068 | 0.36539575  | 0.640851209 |
| ENSMUSG00000048874 | Phf3          | -0.073054916 | 0.365665093 | 0.640851209 |
| ENSMUSG00000067567 | Hdac8         | 0.078815232  | 0.36569949  | 0.640851209 |
| ENSMUSG00000112546 | Gm6992        | 0.045329152  | 0.365584242 | 0.640851209 |
| ENSMUSG00000021022 | Ppp2r3c       | 0.084295687  | 0.365768537 | 0.640881789 |
| ENSMUSG00000028035 | Dnajb4        | -0.07294333  | 0.365831342 | 0.640901424 |
| ENSMUSG00000050947 | Amigo1        | -0.060916932 | 0.366087956 | 0.641260542 |
| ENSMUSG00000017765 | Slc12a4       | -0.058542251 | 0.36630599  | 0.641371117 |
| ENSMUSG00000026450 | Chit1         | -0.064648271 | 0.366302568 | 0.641371117 |
| ENSMUSG00000037134 | Prmt9         | -0.081350916 | 0.366229441 | 0.641371117 |

|                    |           |              |             |             |
|--------------------|-----------|--------------|-------------|-------------|
| ENSMUSG00000116815 | Gm49760   | -0.066925604 | 0.367042381 | 0.642569897 |
| ENSMUSG00000022508 | Bcl6      | -0.047151548 | 0.367372189 | 0.642875452 |
| ENSMUSG00000039536 | Stau1     | -0.082816685 | 0.36735012  | 0.642875452 |
| ENSMUSG00000060336 | Zfp937    | -0.057447906 | 0.367311733 | 0.642875452 |
| ENSMUSG00000001995 | Sipa1l2   | -0.055296722 | 0.367560665 | 0.642945072 |
| ENSMUSG00000003810 | Mast2     | -0.040664364 | 0.367619024 | 0.642945072 |
| ENSMUSG00000026849 | Tor1a     | -0.082109879 | 0.367597325 | 0.642945072 |
| ENSMUSG00000059058 | Tma7-ps   | 0.081906581  | 0.36760822  | 0.642945072 |
| ENSMUSG00000025188 | Hps1      | -0.082994784 | 0.367822266 | 0.643209963 |
| ENSMUSG00000026288 | Inpp5d    | -0.082815879 | 0.367903609 | 0.643261645 |
| ENSMUSG00000037664 | Cdkn1c    | 0.048311121  | 0.367969853 | 0.643286917 |
| ENSMUSG00000025132 | Arhgdia   | -0.082046823 | 0.368042325 | 0.643323068 |
| ENSMUSG00000023104 | Rfc2      | -0.077074565 | 0.368101571 | 0.643336093 |
| ENSMUSG00000007656 | Arpp19    | 0.082858527  | 0.368283439 | 0.643374473 |
| ENSMUSG00000028842 | Ago3      | 0.073740766  | 0.368188039 | 0.643374473 |
| ENSMUSG00000051113 | Fam71e1   | -0.042763839 | 0.368270298 | 0.643374473 |
| ENSMUSG00000059883 | Irak4     | 0.079601404  | 0.36833072  | 0.643374473 |
| ENSMUSG00000073435 | Nme3      | 0.083089322  | 0.368525863 | 0.643624824 |
| ENSMUSG00000038370 | Pcp4l1    | -0.08236179  | 0.368626083 | 0.643709347 |
| ENSMUSG00000078765 | U2af1l4   | 0.073549662  | 0.36868816  | 0.643727246 |
| ENSMUSG00000003309 | Ap1m2     | 0.065101428  | 0.3689102   | 0.644021459 |
| ENSMUSG00000032586 | Traip     | 0.076366583  | 0.369115914 | 0.644021459 |
| ENSMUSG00000038010 | Ccdc138   | -0.081421255 | 0.369014818 | 0.644021459 |
| ENSMUSG00000051413 | Plagl2    | 0.065907776  | 0.369016093 | 0.644021459 |
| ENSMUSG00000104616 | Gm6069    | 0.045922697  | 0.369076852 | 0.644021459 |
| ENSMUSG00000034707 | Gns       | -0.080153944 | 0.369181254 | 0.644044994 |
| ENSMUSG00000082120 | Gm15720   | 0.077604779  | 0.369617463 | 0.64471542  |
| ENSMUSG00000037669 | Ldah      | 0.073076199  | 0.369724184 | 0.644811021 |
| ENSMUSG00000023072 | Cep89     | -0.07393651  | 0.369820207 | 0.644887939 |
| ENSMUSG00000040549 | Ckap5     | -0.08119871  | 0.369918422 | 0.644968658 |
| ENSMUSG00000020901 | Pik3r5    | 0.079259869  | 0.370070392 | 0.645052531 |
| ENSMUSG00000103735 | Gm38317   | -0.0262662   | 0.370048066 | 0.645052531 |
| ENSMUSG00000007950 | Abhd8     | -0.082009323 | 0.370285136 | 0.645245745 |
| ENSMUSG00000019979 | Apaf1     | 0.066784038  | 0.370264014 | 0.645245745 |
| ENSMUSG00000038147 | Cd84      | -0.080899209 | 0.370344563 | 0.645258777 |
| ENSMUSG00000001323 | Srr       | 0.079644627  | 0.370677924 | 0.645701497 |
| ENSMUSG00000036223 | Ska1      | 0.078982074  | 0.370702631 | 0.645701497 |
| ENSMUSG00000019564 | Arid3a    | 0.082288146  | 0.371131838 | 0.646170544 |
| ENSMUSG00000020454 | Eif4enif1 | -0.082370944 | 0.371388094 | 0.646170544 |
| ENSMUSG00000020525 | Ppm1d     | -0.079359745 | 0.371136608 | 0.646170544 |
| ENSMUSG00000027708 | Dcun1d1   | -0.077282698 | 0.371355161 | 0.646170544 |
| ENSMUSG00000030671 | Pde3b     | 0.061646025  | 0.371325178 | 0.646170544 |
| ENSMUSG00000031700 | Gpt2      | -0.07249335  | 0.3710493   | 0.646170544 |

|                    |         |              |             |             |
|--------------------|---------|--------------|-------------|-------------|
| ENSMUSG00000066551 | Hmgb1   | 0.088667001  | 0.371347605 | 0.646170544 |
| ENSMUSG00000105928 | Gm9256  | 0.02568716   | 0.371200366 | 0.646170544 |
| ENSMUSG00000024985 | Tcf7l2  | -0.056055671 | 0.371477215 | 0.646235082 |
| ENSMUSG00000019927 | Ube2d1  | -0.081293302 | 0.371638866 | 0.646289866 |
| ENSMUSG00000026411 | Tmem9   | -0.079875718 | 0.371581489 | 0.646289866 |
| ENSMUSG00000033705 | Stard9  | -0.06220444  | 0.371664803 | 0.646289866 |
| ENSMUSG00000042050 | Wdr60   | -0.062520979 | 0.371765687 | 0.646374803 |
| ENSMUSG00000026873 | Phf19   | -0.065588088 | 0.372083877 | 0.646837485 |
| ENSMUSG00000028189 | Ctbs    | 0.082770783  | 0.372175508 | 0.646906239 |
| ENSMUSG00000033054 | Npat    | -0.076334227 | 0.372311342 | 0.647051794 |
| ENSMUSG00000022218 | Tgm1    | 0.035443165  | 0.372381717 | 0.647083562 |
| ENSMUSG00000021187 | Tc2n    | -0.044362546 | 0.372460745 | 0.647130355 |
| ENSMUSG00000028480 | Glipr2  | 0.071584792  | 0.372723252 | 0.647495875 |
| ENSMUSG00000033177 | Tmprss7 | -0.04156789  | 0.372887985 | 0.647626604 |
| ENSMUSG00000034908 | Sidt2   | -0.075746767 | 0.372902783 | 0.647626604 |
| ENSMUSG00000037752 | Xkr8    | 0.080931064  | 0.372968865 | 0.647650814 |
| ENSMUSG00000021395 | Spin1   | -0.075418081 | 0.373318528 | 0.648167381 |
| ENSMUSG00000031728 | Zfp821  | -0.065621156 | 0.373716675 | 0.648767969 |
| ENSMUSG00000067928 | Zfp760  | -0.072643068 | 0.373876131 | 0.648934002 |
| ENSMUSG00000073968 | Trim68  | -0.063360892 | 0.373916807 | 0.648934002 |
| ENSMUSG00000039176 | Polg    | 0.069801644  | 0.374259546 | 0.64937559  |
| ENSMUSG00000080977 | Gm13772 | 0.08430141   | 0.374275811 | 0.64937559  |
| ENSMUSG00000050721 | Plekho2 | -0.077720775 | 0.374359335 | 0.649429791 |
| ENSMUSG00000003226 | Ranbp2  | 0.072253306  | 0.374573714 | 0.649620232 |
| ENSMUSG00000031016 | Wee1    | -0.078480969 | 0.374543982 | 0.649620232 |
| ENSMUSG00000017760 | Ctsa    | -0.072998101 | 0.374783716 | 0.649884009 |
| ENSMUSG00000092240 | Gm4246  | 0.059687809  | 0.374830452 | 0.649884009 |
| ENSMUSG00000034820 | Cpsf7   | 0.077428577  | 0.374923893 | 0.649955294 |
| ENSMUSG00000048108 | Tmem72  | 0.058397837  | 0.375051861 | 0.650086402 |
| ENSMUSG00000062175 | Tgif2   | -0.059300883 | 0.375118579 | 0.650111325 |
| ENSMUSG00000074092 | Gm6181  | 0.08170928   | 0.375173035 | 0.650114993 |
| ENSMUSG00000020211 | Sf3a2   | -0.04634771  | 0.375363842 | 0.650317168 |
| ENSMUSG00000026240 | Cops7b  | 0.078517704  | 0.37539442  | 0.650317168 |
| ENSMUSG00000020152 | Actr2   | -0.076177191 | 0.375471444 | 0.650359895 |
| ENSMUSG00000018986 | Sifn3   | 0.052933895  | 0.375662179 | 0.650418166 |
| ENSMUSG00000026842 | Abl1    | -0.074200855 | 0.375574589 | 0.650418166 |
| ENSMUSG00000028016 | Ints12  | 0.078072214  | 0.375640967 | 0.650418166 |
| ENSMUSG00000046031 | Calhm6  | 0.080818204  | 0.375816719 | 0.650595047 |
| ENSMUSG00000054932 | Afp     | 0.0763872    | 0.375883376 | 0.650619762 |
| ENSMUSG00000051314 | Ffar2   | 0.074958038  | 0.375939775 | 0.650626717 |
| ENSMUSG00000025409 | Mbd6    | 0.063842682  | 0.376142213 | 0.65074214  |
| ENSMUSG00000032058 | Ppp2r1b | -0.077365162 | 0.376163639 | 0.65074214  |
| ENSMUSG00000039428 | Tmem135 | -0.076636849 | 0.376133056 | 0.65074214  |

|                    |               |              |             |             |
|--------------------|---------------|--------------|-------------|-------------|
| ENSMUSG00000004642 | Slbp          | -0.090792047 | 0.376433531 | 0.650846449 |
| ENSMUSG00000005442 | Cic           | -0.057346995 | 0.376422387 | 0.650846449 |
| ENSMUSG00000028044 | Cks1b         | 0.070302718  | 0.376292176 | 0.650846449 |
| ENSMUSG00000071252 | 2210408121Rik | -0.066620587 | 0.376424688 | 0.650846449 |
| ENSMUSG00000025933 | Tmem14a       | -0.068837123 | 0.376633365 | 0.650968907 |
| ENSMUSG00000048701 | Ccdc6         | -0.07736424  | 0.376564471 | 0.650968907 |
| ENSMUSG00000105808 | Gm42627       | 0.067762577  | 0.376661584 | 0.650968907 |
| ENSMUSG00000026888 | Grb14         | -0.056994573 | 0.37699691  | 0.651457794 |
| ENSMUSG00000045482 | Trrap         | 0.070145152  | 0.377053375 | 0.651464733 |
| ENSMUSG00000117089 | AC126254.1    | -0.042219217 | 0.377126521 | 0.651500489 |
| ENSMUSG00000053390 | Zfp952        | -0.079238576 | 0.377363959 | 0.651820016 |
| ENSMUSG00000004947 | Dtx2          | -0.049738403 | 0.377705199 | 0.652228039 |
| ENSMUSG00000013707 | Tnfaip8l2     | -0.081097401 | 0.37765536  | 0.652228039 |
| ENSMUSG00000024789 | Jak2          | -0.080458156 | 0.377805371 | 0.65231033  |
| ENSMUSG00000083327 | Vcp-rs        | -0.022751198 | 0.377981009 | 0.652522879 |
| ENSMUSG00000058317 | Ube2e2        | -0.076447162 | 0.378236607 | 0.652804238 |
| ENSMUSG00000074178 | Gm10638       | -0.039229005 | 0.378249102 | 0.652804238 |
| ENSMUSG00000019689 | Fmc1          | 0.079903132  | 0.378372556 | 0.652890427 |
| ENSMUSG00000032253 | Phip          | -0.079511756 | 0.378404169 | 0.652890427 |
| ENSMUSG00000029554 | Mad1l1        | -0.07367832  | 0.378516335 | 0.65299325  |
| ENSMUSG00000035772 | Mrps2         | 0.07860645   | 0.378599449 | 0.653045931 |
| ENSMUSG00000001424 | Snd1          | -0.081487742 | 0.378692192 | 0.6531145   |
| ENSMUSG00000050394 | Armcx6        | -0.05969165  | 0.378744364 | 0.6531145   |
| ENSMUSG00000005262 | Ufd1          | 0.077714319  | 0.378910547 | 0.653129046 |
| ENSMUSG00000037580 | Gch1          | -0.080939541 | 0.378839415 | 0.653129046 |
| ENSMUSG00000063236 | 1110038F14Rik | 0.072623263  | 0.378894653 | 0.653129046 |
| ENSMUSG00000020994 | Pnn           | 0.082336995  | 0.379220202 | 0.65339078  |
| ENSMUSG00000031652 | N4bp1         | 0.079973038  | 0.379213147 | 0.65339078  |
| ENSMUSG00000075593 | Gal3st4       | 0.077725216  | 0.379115203 | 0.65339078  |
| ENSMUSG00000023010 | Tmbim6        | -0.041706645 | 0.379884395 | 0.653447454 |
| ENSMUSG00000024914 | Drap1         | 0.073947842  | 0.379744896 | 0.653447454 |
| ENSMUSG00000026728 | Vim           | 0.081023045  | 0.379519415 | 0.653447454 |
| ENSMUSG00000031393 | Mecp2         | -0.080509405 | 0.379698247 | 0.653447454 |
| ENSMUSG00000031902 | Nfatc3        | -0.080582193 | 0.379625614 | 0.653447454 |
| ENSMUSG00000037355 | Uvssa         | -0.074621618 | 0.379414959 | 0.653447454 |
| ENSMUSG00000039982 | Dtx4          | 0.080405115  | 0.379881895 | 0.653447454 |
| ENSMUSG00000040034 | Nup43         | 0.081272282  | 0.37987352  | 0.653447454 |
| ENSMUSG00000068206 | Pick1         | -0.080384138 | 0.379532854 | 0.653447454 |
| ENSMUSG00000068394 | Cep152        | -0.080738712 | 0.379368815 | 0.653447454 |
| ENSMUSG00000079065 | BC005561      | -0.076166179 | 0.37960062  | 0.653447454 |
| ENSMUSG00000090659 | Zfp493        | -0.056339744 | 0.379752806 | 0.653447454 |
| ENSMUSG00000048216 | Gpr85         | 0.049155783  | 0.380001596 | 0.653558547 |
| ENSMUSG00000028848 | Gpn2          | 0.081074877  | 0.380324888 | 0.653842966 |

|                    |               |              |             |             |
|--------------------|---------------|--------------|-------------|-------------|
| ENSMUSG00000036086 | Zranb3        | -0.066096715 | 0.380285345 | 0.653842966 |
| ENSMUSG00000040732 | Erg           | 0.076891417  | 0.380243748 | 0.653842966 |
| ENSMUSG00000048878 | Hexim1        | 0.067532121  | 0.38062726  | 0.654272238 |
| ENSMUSG00000051498 | Tlr6          | -0.072690786 | 0.381079326 | 0.654958669 |
| ENSMUSG00000064254 | Ethe1         | -0.077684667 | 0.381199377 | 0.655074358 |
| ENSMUSG00000039953 | Clstn1        | 0.055786661  | 0.381375229 | 0.65510465  |
| ENSMUSG00000045519 | Zfp560        | 0.08003964   | 0.381322087 | 0.65510465  |
| ENSMUSG00000047635 | 2810006K23Rik | -0.077449331 | 0.381342496 | 0.65510465  |
| ENSMUSG00000027244 | Atg13         | -0.079909075 | 0.381519432 | 0.655261734 |
| ENSMUSG00000051730 | Mettl5        | -0.080034189 | 0.381575877 | 0.655268073 |
| ENSMUSG00000015790 | Surf1         | 0.072104987  | 0.381777008 | 0.655351935 |
| ENSMUSG00000022544 | Eef2kmt       | 0.074496612  | 0.381789489 | 0.655351935 |
| ENSMUSG00000034168 | Irf2bpl       | 0.044318291  | 0.38188852  | 0.655351935 |
| ENSMUSG00000038612 | Mcl1          | 0.075462138  | 0.381838127 | 0.655351935 |
| ENSMUSG00000116925 | Gm49776       | 0.054424248  | 0.381819441 | 0.655351935 |
| ENSMUSG00000020941 | Map3k14       | -0.06422839  | 0.382155219 | 0.655719018 |
| ENSMUSG00000071655 | Ubxn1         | 0.073814854  | 0.382236653 | 0.655768158 |
| ENSMUSG00000046791 | Riox1         | 0.077443334  | 0.382292192 | 0.655772866 |
| ENSMUSG00000005886 | Ncoa2         | 0.049990036  | 0.382487381 | 0.65582046  |
| ENSMUSG00000020801 | Med31         | 0.078217543  | 0.382583935 | 0.65582046  |
| ENSMUSG00000030979 | Uros          | -0.076201059 | 0.38258038  | 0.65582046  |
| ENSMUSG00000058587 | Tmod3         | -0.06536797  | 0.382431583 | 0.65582046  |
| ENSMUSG00000078853 | Igtp          | -0.077546546 | 0.382519492 | 0.65582046  |
| ENSMUSG00000037172 | E330009J07Rik | 0.065348491  | 0.382810587 | 0.656118436 |
| ENSMUSG00000116780 | Gm3417        | 0.038878993  | 0.38300318  | 0.65635796  |
| ENSMUSG00000017677 | Wsb1          | -0.071475138 | 0.383352545 | 0.656547833 |
| ENSMUSG00000020611 | Gna13         | 0.090410296  | 0.383353339 | 0.656547833 |
| ENSMUSG00000026594 | Ralgps2       | -0.078661313 | 0.383378265 | 0.656547833 |
| ENSMUSG00000028089 | Chd1l         | 0.079855247  | 0.383217087 | 0.656547833 |
| ENSMUSG00000046792 | Zfp787        | -0.076554019 | 0.383323112 | 0.656547833 |
| ENSMUSG00000028199 | Cryz          | 0.075126447  | 0.383561631 | 0.656590273 |
| ENSMUSG00000069895 | Atxn1l        | -0.056769953 | 0.383524273 | 0.656590273 |
| ENSMUSG00000113961 | Gm48498       | -0.052910957 | 0.383475734 | 0.656590273 |
| ENSMUSG00000035835 | Plppr3        | -0.079500416 | 0.383871798 | 0.656888722 |
| ENSMUSG00000047694 | Yipf6         | 0.080193953  | 0.383928474 | 0.656888722 |
| ENSMUSG00000071281 | Zfp65         | 0.061132255  | 0.383947518 | 0.656888722 |
| ENSMUSG00000101878 | Gm8203        | 0.07233541   | 0.38381565  | 0.656888722 |
| ENSMUSG00000029311 | Hsd17b11      | 0.079439196  | 0.384077827 | 0.657021167 |
| ENSMUSG00000026516 | Nvl           | 0.080101747  | 0.384521013 | 0.657688723 |
| ENSMUSG00000040599 | Mis12         | -0.075885    | 0.384668156 | 0.65784981  |
| ENSMUSG00000001082 | Mfsd10        | 0.066900424  | 0.385543334 | 0.658135766 |
| ENSMUSG00000004394 | Tmed4         | -0.078993266 | 0.385568513 | 0.658135766 |
| ENSMUSG00000015950 | Ncf1          | 0.076094623  | 0.38522724  | 0.658135766 |

|                    |               |              |             |             |
|--------------------|---------------|--------------|-------------|-------------|
| ENSMUSG00000022114 | Spry2         | 0.056855049  | 0.385556797 | 0.658135766 |
| ENSMUSG00000022452 | Smdt1         | 0.072693877  | 0.385130839 | 0.658135766 |
| ENSMUSG00000024298 | Zfp871        | -0.076802347 | 0.385541784 | 0.658135766 |
| ENSMUSG00000029138 | 4930548H24Rik | -0.04257312  | 0.384953154 | 0.658135766 |
| ENSMUSG00000030120 | Mlf2          | -0.073917996 | 0.385577165 | 0.658135766 |
| ENSMUSG00000037313 | Tacc3         | -0.068356684 | 0.385479505 | 0.658135766 |
| ENSMUSG00000039987 | Phtf2         | 0.059482686  | 0.384949502 | 0.658135766 |
| ENSMUSG00000047757 | Fancb         | -0.079078369 | 0.385330877 | 0.658135766 |
| ENSMUSG00000064367 | mt-Nd5        | -0.075296045 | 0.38527936  | 0.658135766 |
| ENSMUSG00000083911 | Gm4342        | 0.062984097  | 0.385183496 | 0.658135766 |
| ENSMUSG00000116138 | C030006K11Rik | -0.069128292 | 0.385033468 | 0.658135766 |
| ENSMUSG00000024456 | Diaph1        | 0.061824196  | 0.385861063 | 0.658348937 |
| ENSMUSG00000032583 | Mon1a         | -0.078296181 | 0.385815671 | 0.658348937 |
| ENSMUSG00000042225 | Ammecr1       | 0.063740468  | 0.385833709 | 0.658348937 |
| ENSMUSG00000029591 | Ung           | -0.073325545 | 0.386011901 | 0.658515839 |
| ENSMUSG00000026437 | Cdk18         | 0.04030985   | 0.386089034 | 0.658528096 |
| ENSMUSG00000102972 | Gm37348       | -0.059427731 | 0.38612512  | 0.658528096 |
| ENSMUSG00000022020 | Naa16         | 0.079655454  | 0.386245895 | 0.658643638 |
| ENSMUSG00000020022 | Ndufa12       | 0.080441096  | 0.386839545 | 0.659212017 |
| ENSMUSG00000024516 | Sec11c        | 0.073916731  | 0.386834104 | 0.659212017 |
| ENSMUSG00000039850 | Endov         | 0.076282849  | 0.386673646 | 0.659212017 |
| ENSMUSG00000066640 | Fbxl18        | -0.056352191 | 0.386844569 | 0.659212017 |
| ENSMUSG00000074629 | 4930518I15Rik | -0.042071709 | 0.38683756  | 0.659212017 |
| ENSMUSG00000027167 | Elp4          | 0.075144136  | 0.386978752 | 0.659259782 |
| ENSMUSG00000032047 | Acat1         | 0.067341309  | 0.38696299  | 0.659259782 |
| ENSMUSG00000019732 | Calr3         | 0.065181755  | 0.387107902 | 0.659389365 |
| ENSMUSG00000022844 | Pdia5         | 0.075740732  | 0.387242406 | 0.659437609 |
| ENSMUSG00000028745 | Capzb         | -0.074031637 | 0.387194717 | 0.659437609 |
| ENSMUSG00000044465 | Fam160a2      | -0.079239457 | 0.387378105 | 0.659578265 |
| ENSMUSG00000111760 | Gm48337       | 0.079661572  | 0.387510674 | 0.659713553 |
| ENSMUSG00000093402 | Gm18588       | -0.055891118 | 0.387581007 | 0.659742865 |
| ENSMUSG00000021846 | Peli2         | -0.071022272 | 0.387653238 | 0.659775399 |
| ENSMUSG00000028776 | Tinagl1       | 0.04929715   | 0.38772734  | 0.659811109 |
| ENSMUSG00000028668 | Eloa          | -0.073473464 | 0.387991027 | 0.660078968 |
| ENSMUSG00000033671 | Cep350        | -0.076415954 | 0.387985143 | 0.660078968 |
| ENSMUSG00000030083 | Abtb1         | -0.078222171 | 0.38817034  | 0.660293589 |
| ENSMUSG00000024142 | Mlst8         | -0.074243273 | 0.388252549 | 0.660342998 |
| ENSMUSG00000019054 | Fis1          | 0.069511488  | 0.388644883 | 0.660650843 |
| ENSMUSG00000034201 | Gas2l1        | -0.054989547 | 0.388544993 | 0.660650843 |
| ENSMUSG00000047832 | Cdca4         | 0.065413466  | 0.388699489 | 0.660650843 |
| ENSMUSG00000058073 | Gm11189       | 0.058962506  | 0.38854799  | 0.660650843 |
| ENSMUSG00000096696 | Zfp960        | -0.077716016 | 0.388678863 | 0.660650843 |
| ENSMUSG00000011831 | Evi5          | -0.077656004 | 0.388804205 | 0.660679341 |

|                    |               |              |             |             |
|--------------------|---------------|--------------|-------------|-------------|
| ENSMUSG00000017929 | B4galt5       | -0.063013503 | 0.388822638 | 0.660679341 |
| ENSMUSG00000021650 | Ptcd2         | 0.069298445  | 0.388942761 | 0.660777442 |
| ENSMUSG00000047379 | B4gat1        | -0.077963439 | 0.388986769 | 0.660777442 |
| ENSMUSG00000053030 | Spink2        | 0.036600394  | 0.389060377 | 0.660812108 |
| ENSMUSG00000034442 | Trmt5         | -0.072869202 | 0.389261365 | 0.661063086 |
| ENSMUSG00000033423 | Eri3          | -0.080136095 | 0.389421918 | 0.661245338 |
| ENSMUSG00000068966 | Zbtb34        | 0.0579095    | 0.389606751 | 0.661468762 |
| ENSMUSG00000028451 | 1700022111Rik | -0.03213627  | 0.389737786 | 0.661600799 |
| ENSMUSG00000020228 | Helb          | -0.075507865 | 0.389812255 | 0.661612893 |
| ENSMUSG00000096401 | Gm21811       | -0.065473334 | 0.389851442 | 0.661612893 |
| ENSMUSG00000027589 | Pcmdt2        | -0.078929185 | 0.390198358 | 0.661627616 |
| ENSMUSG00000040321 | Zfp770        | 0.04983736   | 0.390021211 | 0.661627616 |
| ENSMUSG00000053338 | Tarm1         | 0.04706172   | 0.390232986 | 0.661627616 |
| ENSMUSG00000060012 | Kif13b        | -0.0675538   | 0.390045443 | 0.661627616 |
| ENSMUSG00000062456 | Rpl9-ps6      | -0.056340639 | 0.390119342 | 0.661627616 |
| ENSMUSG00000064363 | mt-Nd4        | -0.069190344 | 0.390205671 | 0.661627616 |
| ENSMUSG00000080999 | Gm11336       | 0.078352813  | 0.390133827 | 0.661627616 |
| ENSMUSG00000030031 | Kbtbd8        | 0.038586107  | 0.39053986  | 0.661967194 |
| ENSMUSG00000050772 | Olfr1124      | -0.07627746  | 0.390537345 | 0.661967194 |
| ENSMUSG00000040345 | Arhgap9       | -0.077811241 | 0.390614484 | 0.662003344 |
| ENSMUSG00000018900 | Slc22a5       | -0.066920653 | 0.390806853 | 0.662160561 |
| ENSMUSG00000043036 | Ccdc63        | -0.066820936 | 0.390813869 | 0.662160561 |
| ENSMUSG00000022601 | Zbtb11        | -0.078023342 | 0.39093927  | 0.662192374 |
| ENSMUSG00000040659 | Efhd2         | -0.076793305 | 0.390921416 | 0.662192374 |
| ENSMUSG00000048707 | Tprn          | -0.070437186 | 0.391095385 | 0.662366481 |
| ENSMUSG00000000751 | Rpa1          | -0.077349342 | 0.391391985 | 0.662597772 |
| ENSMUSG00000023050 | Map3k12       | -0.051062912 | 0.391329809 | 0.662597772 |
| ENSMUSG00000030447 | Cyfip1        | -0.073334384 | 0.391382863 | 0.662597772 |
| ENSMUSG00000020661 | Dnmt3a        | -0.076994159 | 0.391671947 | 0.662891028 |
| ENSMUSG00000036875 | Dna2          | -0.07638594  | 0.391623281 | 0.662891028 |
| ENSMUSG00000099583 | Hist1h3d      | 0.040622632  | 0.391888401 | 0.663167006 |
| ENSMUSG00000026977 | March7        | 0.070833405  | 0.391996645 | 0.663169481 |
| ENSMUSG00000032254 | Kif23         | -0.076223612 | 0.391988878 | 0.663169481 |
| ENSMUSG00000021969 | Zdhhc20       | 0.078738049  | 0.392116208 | 0.663211309 |
| ENSMUSG00000027378 | Nphp1         | 0.076844272  | 0.392161719 | 0.663211309 |
| ENSMUSG00000051457 | Spn           | -0.07813947  | 0.392186669 | 0.663211309 |
| ENSMUSG00000056116 | H2-T22        | -0.07682405  | 0.392234947 | 0.663211309 |
| ENSMUSG00000064345 | mt-Nd2        | -0.070789819 | 0.392351396 | 0.663227639 |
| ENSMUSG00000084071 | Gm13378       | 0.052345222  | 0.392298731 | 0.663227639 |
| ENSMUSG00000060579 | Fhit          | -0.052652871 | 0.392414977 | 0.663244853 |
| ENSMUSG00000110777 | Ifi30         | 0.072920935  | 0.392476693 | 0.663258911 |
| ENSMUSG00000030064 | Frmd4b        | -0.028312143 | 0.392698557 | 0.663453316 |
| ENSMUSG00000038692 | Hoxb4         | -0.050636566 | 0.392661877 | 0.663453316 |

|                    |            |              |             |             |
|--------------------|------------|--------------|-------------|-------------|
| ENSMUSG00000030670 | Cyp2r1     | -0.063802631 | 0.392815541 | 0.663560701 |
| ENSMUSG00000010911 | Apip       | 0.077079006  | 0.393350358 | 0.663832173 |
| ENSMUSG00000024955 | Esrra      | -0.046170694 | 0.39318087  | 0.663832173 |
| ENSMUSG00000025545 | Clybl      | 0.074202761  | 0.39309821  | 0.663832173 |
| ENSMUSG00000025931 | Paqr8      | 0.047064169  | 0.393260091 | 0.663832173 |
| ENSMUSG00000026923 | Notch1     | -0.044938944 | 0.393195387 | 0.663832173 |
| ENSMUSG00000063870 | Chd4       | 0.078171084  | 0.393200256 | 0.663832173 |
| ENSMUSG00000074922 | Fam122a    | 0.077663429  | 0.393308753 | 0.663832173 |
| ENSMUSG00000023912 | Slc25a27   | -0.04089807  | 0.393573681 | 0.664028618 |
| ENSMUSG00000080989 | Gm14048    | 0.042256592  | 0.393568937 | 0.664028618 |
| ENSMUSG00000000902 | Smarcb1    | 0.066350563  | 0.394247735 | 0.664102129 |
| ENSMUSG00000019487 | Trip10     | -0.068438276 | 0.393945224 | 0.664102129 |
| ENSMUSG00000021908 | Gm6768     | 0.078412674  | 0.394258844 | 0.664102129 |
| ENSMUSG00000022797 | Tfrc       | 0.037829697  | 0.3940632   | 0.664102129 |
| ENSMUSG00000024525 | Impa2      | 0.067631496  | 0.394207883 | 0.664102129 |
| ENSMUSG00000026796 | Fam129b    | -0.028162192 | 0.394039776 | 0.664102129 |
| ENSMUSG00000029196 | Tada2b     | -0.077731747 | 0.393844143 | 0.664102129 |
| ENSMUSG00000029703 | Lrwd1      | 0.073515363  | 0.394143252 | 0.664102129 |
| ENSMUSG00000039804 | Ncoa5      | -0.069895716 | 0.393837559 | 0.664102129 |
| ENSMUSG00000058709 | Egln2      | -0.077179459 | 0.393685893 | 0.664102129 |
| ENSMUSG00000104126 | Gm37486    | 0.071401835  | 0.394150624 | 0.664102129 |
| ENSMUSG00000109941 | Exosc6     | 0.078814273  | 0.393938019 | 0.664102129 |
| ENSMUSG00000057093 | Zfp607b    | -0.057441624 | 0.39431657  | 0.664109304 |
| ENSMUSG00000022095 | Fam160b2   | -0.073110993 | 0.394603583 | 0.664502591 |
| ENSMUSG00000006154 | Eps8l1     | -0.014560468 | 0.394723585 | 0.664538033 |
| ENSMUSG00000024135 | Srbd1      | 0.056693828  | 0.394841748 | 0.664538033 |
| ENSMUSG00000027253 | Lrp4       | -0.065482862 | 0.394818138 | 0.664538033 |
| ENSMUSG00000031304 | Il2rg      | 0.07812433   | 0.39477793  | 0.664538033 |
| ENSMUSG00000116128 | LT629148.8 | -0.029476237 | 0.394892136 | 0.664538033 |
| ENSMUSG00000021495 | Fam193b    | -0.077602033 | 0.395091887 | 0.664718137 |
| ENSMUSG00000022519 | Srl        | 0.048161955  | 0.395119073 | 0.664718137 |
| ENSMUSG00000031264 | Btk        | 0.068196028  | 0.395159707 | 0.664718137 |
| ENSMUSG00000034641 | Cd300ld    | 0.049388803  | 0.395338982 | 0.664929655 |
| ENSMUSG00000004266 | Ptpn6      | -0.07494735  | 0.395498908 | 0.665056139 |
| ENSMUSG00000021496 | Pcbd2      | 0.073734677  | 0.395532923 | 0.665056139 |
| ENSMUSG00000022721 | Trmt2a     | -0.067535209 | 0.395660993 | 0.665056139 |
| ENSMUSG00000026853 | Crat       | 0.076751929  | 0.395993128 | 0.665056139 |
| ENSMUSG00000027428 | Rbbp9      | -0.07694194  | 0.396052161 | 0.665056139 |
| ENSMUSG00000028173 | Wls        | -0.071922498 | 0.395811696 | 0.665056139 |
| ENSMUSG00000028898 | Trnau1ap   | 0.078507259  | 0.395658869 | 0.665056139 |
| ENSMUSG00000028907 | Utp11      | 0.074962606  | 0.395999974 | 0.665056139 |
| ENSMUSG00000030231 | Plekha5    | 0.056157969  | 0.396056699 | 0.665056139 |
| ENSMUSG00000037904 | Ankrd9     | -0.067655761 | 0.396024564 | 0.665056139 |

|                    |               |              |             |             |
|--------------------|---------------|--------------|-------------|-------------|
| ENSMUSG00000067873 | Htatsf1       | 0.065065016  | 0.395741926 | 0.665056139 |
| ENSMUSG00000101452 | Gm28530       | 0.031021539  | 0.395966025 | 0.665056139 |
| ENSMUSG00000035401 | Emsy          | -0.073442231 | 0.396285116 | 0.665349747 |
| ENSMUSG00000042148 | Cox10         | 0.075710553  | 0.396980804 | 0.666427702 |
| ENSMUSG00000049658 | Bdp1          | 0.076736514  | 0.397117306 | 0.666566765 |
| ENSMUSG00000029563 | Foxp2         | -0.021817561 | 0.397260416 | 0.66671688  |
| ENSMUSG00000022195 | 6030458C11Rik | -0.077197289 | 0.397465063 | 0.666880123 |
| ENSMUSG00000026455 | Klhl12        | -0.075781519 | 0.397421355 | 0.666880123 |
| ENSMUSG00000019791 | Hint3         | 0.077076672  | 0.397641063 | 0.666905164 |
| ENSMUSG00000039568 | Ubald1        | -0.0734413   | 0.397557827 | 0.666905164 |
| ENSMUSG00000081375 | Gm14686       | -0.060399229 | 0.397639113 | 0.666905164 |
| ENSMUSG00000021550 | 2210016F16Rik | 0.070485881  | 0.39848536  | 0.668050567 |
| ENSMUSG00000036281 | Snapc4        | -0.051769754 | 0.398401489 | 0.668050567 |
| ENSMUSG00000056267 | Cep70         | -0.0751373   | 0.398468375 | 0.668050567 |
| ENSMUSG00000030109 | Slc6a12       | -0.029254918 | 0.398584516 | 0.668126623 |
| ENSMUSG00000012296 | Tjap1         | -0.06070175  | 0.398859522 | 0.668150907 |
| ENSMUSG00000020109 | Dnajb12       | 0.076731275  | 0.398734868 | 0.668150907 |
| ENSMUSG00000024750 | Zfand5        | -0.076489422 | 0.399083918 | 0.668150907 |
| ENSMUSG00000029613 | Eif2ak1       | -0.076456574 | 0.399245102 | 0.668150907 |
| ENSMUSG00000041846 | Ppp4r3a       | 0.076597189  | 0.398728467 | 0.668150907 |
| ENSMUSG00000051182 | Olfr655       | -0.07459505  | 0.398980352 | 0.668150907 |
| ENSMUSG00000052911 | Lamb2         | 0.026603038  | 0.399062203 | 0.668150907 |
| ENSMUSG00000053907 | Mat2a         | 0.074131919  | 0.399292949 | 0.668150907 |
| ENSMUSG00000060131 | Atp8b4        | -0.073714461 | 0.398810936 | 0.668150907 |
| ENSMUSG00000068267 | Cenpb         | 0.064510006  | 0.399274717 | 0.668150907 |
| ENSMUSG00000078908 | Mon1b         | -0.07736829  | 0.398955149 | 0.668150907 |
| ENSMUSG00000086691 | Gm15432       | 0.072403563  | 0.3992983   | 0.668150907 |
| ENSMUSG00000112145 | Gm6218        | 0.05272595   | 0.399032264 | 0.668150907 |
| ENSMUSG00000041528 | Rnf123        | -0.077207477 | 0.399516499 | 0.668335951 |
| ENSMUSG00000069014 | Gm5641        | 0.077337099  | 0.399498548 | 0.668335951 |
| ENSMUSG00000023827 | Agpat4        | -0.044438942 | 0.399659115 | 0.668484496 |
| ENSMUSG00000015224 | Cyp2j9        | -0.056806446 | 0.400064369 | 0.668507926 |
| ENSMUSG00000020307 | Cdc34         | 0.072807036  | 0.399798021 | 0.668507926 |
| ENSMUSG00000024052 | Lpin2         | 0.075019684  | 0.400103689 | 0.668507926 |
| ENSMUSG00000024290 | Rock1         | -0.066349898 | 0.399884214 | 0.668507926 |
| ENSMUSG00000024420 | Zfp521        | -0.025464355 | 0.400103342 | 0.668507926 |
| ENSMUSG00000032673 | Prorsd1       | 0.076416469  | 0.399768159 | 0.668507926 |
| ENSMUSG00000043153 | lspd          | 0.063696416  | 0.399945434 | 0.668507926 |
| ENSMUSG00000052139 | Babam2        | -0.072921333 | 0.399904777 | 0.668507926 |
| ENSMUSG00000033186 | Mzt1          | -0.072079324 | 0.400575252 | 0.669205812 |
| ENSMUSG00000028862 | Map3k6        | 0.053645031  | 0.400817878 | 0.669377758 |
| ENSMUSG00000032601 | Prkar2a       | 0.060761851  | 0.400808122 | 0.669377758 |
| ENSMUSG00000040586 | Ofd1          | 0.072680281  | 0.400839849 | 0.669377758 |

|                    |            |              |             |             |
|--------------------|------------|--------------|-------------|-------------|
| ENSMUSG00000020523 | Fam114a2   | -0.06752102  | 0.401100373 | 0.66963276  |
| ENSMUSG00000036291 | Ap5m1      | -0.075866222 | 0.401077992 | 0.66963276  |
| ENSMUSG00000038481 | Cdk19      | 0.068763965  | 0.401246039 | 0.669785923 |
| ENSMUSG00000037706 | Cd81       | 0.077884382  | 0.401551525 | 0.67020579  |
| ENSMUSG00000025937 | Lactb2     | 0.075535707  | 0.401639423 | 0.670262432 |
| ENSMUSG00000026304 | Rab17      | -0.062709855 | 0.401822706 | 0.670478215 |
| ENSMUSG00000075132 | Olfr1173   | 0.061608714  | 0.40218622  | 0.670994633 |
| ENSMUSG00000024764 | Naa40      | -0.075697715 | 0.402286918 | 0.671072497 |
| ENSMUSG00000039844 | Rapgef1    | 0.074925788  | 0.402658971 | 0.671549321 |
| ENSMUSG00000054752 | Fsd1l      | -0.056255677 | 0.40268089  | 0.671549321 |
| ENSMUSG00000024833 | Pola2      | -0.062779957 | 0.403153847 | 0.672247809 |
| ENSMUSG00000013033 | Adgrl1     | 0.039930742  | 0.40338147  | 0.6724356   |
| ENSMUSG00000030301 | Ccdc91     | 0.035324031  | 0.403388086 | 0.6724356   |
| ENSMUSG00000052566 | Hook2      | -0.076142166 | 0.403428878 | 0.6724356   |
| ENSMUSG00000042167 | Tent2      | -0.068963009 | 0.403508877 | 0.672478096 |
| ENSMUSG00000063171 | Rps4l      | 0.074966589  | 0.403562654 | 0.672478096 |
| ENSMUSG00000002741 | Ykt6       | -0.073685185 | 0.40394732  | 0.672617619 |
| ENSMUSG00000051316 | Taf7       | -0.071299406 | 0.403860305 | 0.672617619 |
| ENSMUSG00000054312 | Mrps21     | 0.076114217  | 0.403919107 | 0.672617619 |
| ENSMUSG00000054626 | Xlr        | 0.047124418  | 0.403959876 | 0.672617619 |
| ENSMUSG00000071203 | Naip5      | -0.066057787 | 0.403867019 | 0.672617619 |
| ENSMUSG00000115938 | Gm17241    | 0.065528309  | 0.403971293 | 0.672617619 |
| ENSMUSG00000023963 | Cyp39a1    | -0.074857885 | 0.40418562  | 0.672884277 |
| ENSMUSG00000053253 | Ndfip2     | -0.073480592 | 0.404334846 | 0.673001282 |
| ENSMUSG00000075704 | Txnrd2     | 0.076536909  | 0.404364267 | 0.673001282 |
| ENSMUSG00000015714 | Cers2      | -0.064429019 | 0.404438655 | 0.673026078 |
| ENSMUSG00000021577 | Sdha       | 0.064192116  | 0.404575869 | 0.673026078 |
| ENSMUSG00000021690 | Jmy        | -0.061621352 | 0.404595904 | 0.673026078 |
| ENSMUSG00000032217 | Rnf111     | -0.074871584 | 0.404532632 | 0.673026078 |
| ENSMUSG00000116330 | Ifi47      | 0.075110934  | 0.404687196 | 0.673087796 |
| ENSMUSG00000002222 | Rmnd5a     | 0.06105132   | 0.405112295 | 0.673441098 |
| ENSMUSG00000017057 | Ii13ra1    | 0.046708342  | 0.405000404 | 0.673441098 |
| ENSMUSG00000017801 | Mlx        | 0.072936473  | 0.405141826 | 0.673441098 |
| ENSMUSG00000026355 | Mcm6       | -0.079075427 | 0.405192782 | 0.673441098 |
| ENSMUSG00000031015 | Swap70     | -0.070027753 | 0.40515232  | 0.673441098 |
| ENSMUSG00000081671 | Gm13167    | 0.04473447   | 0.405224923 | 0.673441098 |
| ENSMUSG00000026473 | Glul       | 0.074938752  | 0.405667984 | 0.674066757 |
| ENSMUSG00000038776 | Ephx1      | -0.039079888 | 0.405800192 | 0.674066757 |
| ENSMUSG00000047061 | Gm9817     | -0.040670371 | 0.405853216 | 0.674066757 |
| ENSMUSG00000056592 | Zfp658     | -0.043787933 | 0.405872737 | 0.674066757 |
| ENSMUSG00000115890 | MF597746.1 | 0.042726878  | 0.405762703 | 0.674066757 |
| ENSMUSG00000014859 | E2f4       | -0.077149475 | 0.405978276 | 0.674151893 |
| ENSMUSG00000014496 | Ankrd28    | 0.06973855   | 0.40632374  | 0.674181733 |

|                    |               |              |             |             |
|--------------------|---------------|--------------|-------------|-------------|
| ENSMUSG00000014725 | Adam28        | -0.044761869 | 0.406636405 | 0.674181733 |
| ENSMUSG00000015355 | Cd48          | -0.072172057 | 0.406616417 | 0.674181733 |
| ENSMUSG00000019173 | Rab5c         | 0.073467731  | 0.406549714 | 0.674181733 |
| ENSMUSG00000022307 | Oxr1          | -0.075575565 | 0.406533243 | 0.674181733 |
| ENSMUSG00000028096 | Gpr89         | 0.07320045   | 0.406430575 | 0.674181733 |
| ENSMUSG00000033826 | Dnah8         | -0.076026127 | 0.406541939 | 0.674181733 |
| ENSMUSG00000035595 | 1600002K03Rik | 0.075407622  | 0.406647576 | 0.674181733 |
| ENSMUSG00000045107 | Saysd1        | -0.075608361 | 0.406458536 | 0.674181733 |
| ENSMUSG00000053192 | Mllt11        | -0.073780728 | 0.406563509 | 0.674181733 |
| ENSMUSG00000063897 | CAA01118383.1 | -0.070408315 | 0.406453951 | 0.674181733 |
| ENSMUSG00000116046 | AL731810.1    | -0.053122724 | 0.406264124 | 0.674181733 |
| ENSMUSG00000057375 | Yipf1         | 0.063225616  | 0.406714216 | 0.674202226 |
| ENSMUSG00000059970 | Hspa2         | 0.075441949  | 0.406970205 | 0.674536552 |
| ENSMUSG00000028403 | Zdhhc21       | -0.068604738 | 0.407325369 | 0.674992622 |
| ENSMUSG00000035133 | Arhgap5       | 0.055725407  | 0.407354053 | 0.674992622 |
| ENSMUSG00000038539 | Atf5          | -0.035555963 | 0.40743224  | 0.675032126 |
| ENSMUSG00000032867 | Fbxw8         | -0.073595938 | 0.407604681 | 0.67522776  |
| ENSMUSG00000000628 | Hk2           | 0.061725764  | 0.407731278 | 0.675279584 |
| ENSMUSG00000006445 | Epha2         | -0.035396717 | 0.407744697 | 0.675279584 |
| ENSMUSG00000021240 | Abcd4         | -0.072864596 | 0.40804914  | 0.675693689 |
| ENSMUSG00000028990 | Lzic          | -0.070457108 | 0.408225785 | 0.675896091 |
| ENSMUSG00000014554 | Dguok         | -0.067879968 | 0.408396118 | 0.676012431 |
| ENSMUSG00000031808 | Slc27a1       | -0.055291564 | 0.408404901 | 0.676012431 |
| ENSMUSG00000043323 | Fbrsl1        | -0.054889835 | 0.408541373 | 0.67614822  |
| ENSMUSG00000025359 | Pmel          | -0.03921319  | 0.408847853 | 0.676509953 |
| ENSMUSG00000045799 | Gm9800        | 0.071039671  | 0.408868869 | 0.676509953 |
| ENSMUSG00000031483 | Erlin2        | -0.071527557 | 0.408996738 | 0.676541281 |
| ENSMUSG00000049134 | Nrap          | 0.031373388  | 0.40897966  | 0.676541281 |
| ENSMUSG00000078813 | Leng1         | -0.073884375 | 0.409156223 | 0.676714972 |
| ENSMUSG00000021557 | Agtppbp1      | -0.075258372 | 0.409366456 | 0.676900093 |
| ENSMUSG00000047248 | C2cd3         | 0.070012207  | 0.409377143 | 0.676900093 |
| ENSMUSG00000048856 | Slc25a47      | 0.050147148  | 0.409439145 | 0.676912501 |
| ENSMUSG00000039086 | Ss18l1        | -0.054451202 | 0.409511483 | 0.676941993 |
| ENSMUSG00000047989 | Ino80c        | 0.076835456  | 0.409576836 | 0.676959932 |
| ENSMUSG00000004040 | Stat3         | -0.075116586 | 0.409912365 | 0.677064028 |
| ENSMUSG00000016382 | Pls3          | -0.063880801 | 0.409899962 | 0.677064028 |
| ENSMUSG00000021494 | Ddx41         | -0.071589465 | 0.409901423 | 0.677064028 |
| ENSMUSG00000031145 | Prickle3      | -0.073813605 | 0.409728631 | 0.677064028 |
| ENSMUSG00000041642 | Kif21b        | 0.052665332  | 0.409825272 | 0.677064028 |
| ENSMUSG00000042606 | Hirip3        | 0.067808805  | 0.410016438 | 0.677085329 |
| ENSMUSG00000049295 | Zfp219        | -0.068933379 | 0.410034284 | 0.677085329 |
| ENSMUSG00000078429 | Ctdsp2        | 0.074511594  | 0.41011113  | 0.677122204 |
| ENSMUSG00000025201 | Bloc1s2-ps    | 0.069233103  | 0.410266365 | 0.677288479 |

|                    |               |              |             |             |
|--------------------|---------------|--------------|-------------|-------------|
| ENSMUSG00000073371 | Gm6594        | 0.037996348  | 0.410708621 | 0.677928475 |
| ENSMUSG00000029049 | Morn1         | -0.049888391 | 0.410775917 | 0.677949464 |
| ENSMUSG00000007458 | M6pr          | -0.076176036 | 0.410838573 | 0.67796279  |
| ENSMUSG00000022533 | Atp13a3       | 0.063042799  | 0.411096416 | 0.678298164 |
| ENSMUSG00000028602 | Tnfrsf8       | -0.042686696 | 0.411268838 | 0.67836902  |
| ENSMUSG00000040429 | Mterf1a       | -0.073706809 | 0.411303204 | 0.67836902  |
| ENSMUSG00000109055 | Gm2676        | 0.034712116  | 0.411241324 | 0.67836902  |
| ENSMUSG00000032782 | Cntrob        | 0.057901904  | 0.411429123 | 0.67846436  |
| ENSMUSG00000045259 | Klhdc9        | 0.048656845  | 0.411470254 | 0.67846436  |
| ENSMUSG00000013523 | Bcas1         | -0.04825074  | 0.411602665 | 0.678502549 |
| ENSMUSG00000089808 | Gm7241        | -0.031210615 | 0.41157773  | 0.678502549 |
| ENSMUSG00000040860 | Crocc         | 0.047825897  | 0.411924627 | 0.678943179 |
| ENSMUSG00000036986 | Pml           | -0.074802333 | 0.412091462 | 0.679043336 |
| ENSMUSG00000039148 | Sart1         | 0.06860022   | 0.412094732 | 0.679043336 |
| ENSMUSG00000060512 | 0610040J01Rik | -0.074964998 | 0.412269825 | 0.679241742 |
| ENSMUSG00000007035 | Msh5          | 0.064109243  | 0.412446543 | 0.679276569 |
| ENSMUSG00000018541 | Cwc25         | 0.069862419  | 0.412699511 | 0.679276569 |
| ENSMUSG00000022463 | Srebfb2       | -0.074159398 | 0.412728465 | 0.679276569 |
| ENSMUSG00000035069 | Oma1          | -0.073551735 | 0.412613163 | 0.679276569 |
| ENSMUSG00000039427 | Alg1          | 0.072846577  | 0.41266059  | 0.679276569 |
| ENSMUSG00000050966 | Lin28a        | 0.030247782  | 0.41256599  | 0.679276569 |
| ENSMUSG00000062040 | Zfp27         | -0.050683094 | 0.412466289 | 0.679276569 |
| ENSMUSG00000070960 | Gm19680       | 0.071058091  | 0.412398533 | 0.679276569 |
| ENSMUSG00000023923 | Tbc1d5        | 0.061267329  | 0.412950591 | 0.679421808 |
| ENSMUSG00000032366 | Tpm1          | 0.074712727  | 0.412980811 | 0.679421808 |
| ENSMUSG00000073448 | Gm10509       | -0.04772701  | 0.412943187 | 0.679421808 |
| ENSMUSG00000086158 | Ccpg1os       | 0.074366543  | 0.413089023 | 0.679509833 |
| ENSMUSG00000000811 | Txnrd3        | -0.071394158 | 0.414855223 | 0.679898798 |
| ENSMUSG00000001467 | Cyp51         | -0.067398975 | 0.414679536 | 0.679898798 |
| ENSMUSG00000008958 | Vps72         | -0.073595854 | 0.414546159 | 0.679898798 |
| ENSMUSG00000010607 | Pigyl         | 0.068204146  | 0.413823456 | 0.679898798 |
| ENSMUSG00000020654 | Adcy3         | 0.047245938  | 0.414306824 | 0.679898798 |
| ENSMUSG00000021643 | Serf1         | 0.071896029  | 0.414075472 | 0.679898798 |
| ENSMUSG00000021785 | Ngly1         | -0.072916986 | 0.414107726 | 0.679898798 |
| ENSMUSG00000026269 | Rnpepl1       | -0.052356559 | 0.414387476 | 0.679898798 |
| ENSMUSG00000026289 | Atg16l1       | -0.069722522 | 0.41446782  | 0.679898798 |
| ENSMUSG00000026580 | Selp          | -0.070359873 | 0.413861333 | 0.679898798 |
| ENSMUSG00000029192 | Tbc1d14       | -0.057696851 | 0.413978548 | 0.679898798 |
| ENSMUSG00000031729 | Ist1          | -0.073056768 | 0.414855997 | 0.679898798 |
| ENSMUSG00000031845 | Bco1          | 0.056024882  | 0.414137166 | 0.679898798 |
| ENSMUSG00000032342 | Mto1          | -0.069114978 | 0.414948038 | 0.679898798 |
| ENSMUSG00000032456 | Nmnat3        | 0.074961831  | 0.413912639 | 0.679898798 |
| ENSMUSG00000033938 | Ndufb7        | 0.07426135   | 0.414542554 | 0.679898798 |

|                    |               |              |             |             |
|--------------------|---------------|--------------|-------------|-------------|
| ENSMUSG00000036391 | Sec24a        | -0.070528815 | 0.414511216 | 0.679898798 |
| ENSMUSG00000038843 | Gcnt1         | -0.072302681 | 0.414967618 | 0.679898798 |
| ENSMUSG00000043015 | Nemp2         | -0.069478182 | 0.414603606 | 0.679898798 |
| ENSMUSG00000046556 | Zfp319        | -0.066300938 | 0.413600498 | 0.679898798 |
| ENSMUSG00000049502 | Dtx3l         | 0.063889326  | 0.413528459 | 0.679898798 |
| ENSMUSG00000070003 | Ssbp4         | 0.069681766  | 0.414917521 | 0.679898798 |
| ENSMUSG00000072620 | Slfn2         | -0.074167686 | 0.413798289 | 0.679898798 |
| ENSMUSG00000073598 | 1700066B19Rik | -0.067732789 | 0.414665298 | 0.679898798 |
| ENSMUSG00000074384 | Al429214      | -0.039416598 | 0.413838862 | 0.679898798 |
| ENSMUSG00000080981 | Gm12161       | -0.068972169 | 0.41418843  | 0.679898798 |
| ENSMUSG00000082465 | Rps6-ps3      | 0.031595767  | 0.414834984 | 0.679898798 |
| ENSMUSG00000090036 | Gm15900       | -0.063332129 | 0.414111364 | 0.679898798 |
| ENSMUSG00000090362 | Vmn2r79       | 0.052827283  | 0.414667444 | 0.679898798 |
| ENSMUSG00000094320 | Chchd2-ps     | 0.028163034  | 0.41444641  | 0.679898798 |
| ENSMUSG00000030704 | Rab6a         | 0.070379248  | 0.415191594 | 0.680086349 |
| ENSMUSG00000034321 | Exosc1        | 0.070818094  | 0.415143648 | 0.680086349 |
| ENSMUSG00000030047 | Arhgap25      | -0.072774898 | 0.415385382 | 0.68031406  |
| ENSMUSG00000001017 | Chtop         | 0.066992345  | 0.415703838 | 0.68045831  |
| ENSMUSG00000015092 | Edf1          | 0.07245569   | 0.415551332 | 0.68045831  |
| ENSMUSG00000024732 | Ccdc86        | 0.073058045  | 0.415611559 | 0.68045831  |
| ENSMUSG00000025226 | Fbxl15        | 0.073369046  | 0.415645462 | 0.68045831  |
| ENSMUSG00000069873 | 4930438A08Rik | 0.072103881  | 0.415747373 | 0.68045831  |
| ENSMUSG00000033964 | Zbtb41        | -0.065393628 | 0.41585762  | 0.680549078 |
| ENSMUSG00000006731 | B4galnt1      | -0.071579301 | 0.41601908  | 0.68060983  |
| ENSMUSG00000029076 | Sdf4          | 0.062452289  | 0.415998939 | 0.68060983  |
| ENSMUSG00000034403 | Pja1          | -0.070538302 | 0.416059129 | 0.68060983  |
| ENSMUSG00000071516 | Hist1h2ai     | 0.062354149  | 0.416132743 | 0.680640611 |
| ENSMUSG00000030189 | Ybx3          | 0.070317292  | 0.416289271 | 0.680689372 |
| ENSMUSG00000059278 | Naa38         | 0.069960387  | 0.416228193 | 0.680689372 |
| ENSMUSG00000075289 | Carns1        | -0.058013066 | 0.416326959 | 0.680689372 |
| ENSMUSG00000078681 | Tm2d3         | -0.070681266 | 0.416498008 | 0.68087941  |
| ENSMUSG00000019920 | Lims1         | -0.073440453 | 0.416747072 | 0.680984844 |
| ENSMUSG00000026622 | Nek2          | 0.068517682  | 0.416777432 | 0.680984844 |
| ENSMUSG00000030336 | Cd27          | -0.069582695 | 0.416836629 | 0.680984844 |
| ENSMUSG00000043770 | Gm12481       | -0.067139242 | 0.416718292 | 0.680984844 |
| ENSMUSG00000087260 | Lamtor5       | 0.065239015  | 0.416794813 | 0.680984844 |
| ENSMUSG00000018841 | Rad51d        | -0.073377987 | 0.417187843 | 0.681128526 |
| ENSMUSG00000028557 | Rnf11         | 0.073662824  | 0.417136898 | 0.681128526 |
| ENSMUSG00000030108 | Slc6a13       | 0.073391621  | 0.417126135 | 0.681128526 |
| ENSMUSG00000053040 | Aph1c         | 0.072690775  | 0.417035879 | 0.681128526 |
| ENSMUSG00000080717 | B230307C23Rik | -0.073464201 | 0.417198763 | 0.681128526 |
| ENSMUSG00000022679 | Mpv17l        | -0.07270262  | 0.417364816 | 0.681131045 |
| ENSMUSG00000025525 | Apool         | 0.070744616  | 0.417342511 | 0.681131045 |

|                    |          |              |             |             |
|--------------------|----------|--------------|-------------|-------------|
| ENSMUSG00000038160 | Atg5     | 0.070763067  | 0.417308973 | 0.681131045 |
| ENSMUSG00000021466 | Ptch1    | 0.058371185  | 0.417762529 | 0.681511475 |
| ENSMUSG00000041135 | Ripk2    | 0.074242688  | 0.417754992 | 0.681511475 |
| ENSMUSG00000056536 | Pign     | -0.07206423  | 0.417728876 | 0.681511475 |
| ENSMUSG00000004771 | Rab11a   | 0.063041907  | 0.417870936 | 0.681585254 |
| ENSMUSG00000040359 | Ufl1     | 0.074286383  | 0.417917502 | 0.681585254 |
| ENSMUSG00000000776 | Polr3d   | 0.072918037  | 0.41798261  | 0.681601943 |
| ENSMUSG00000020705 | Ddx42    | 0.070614697  | 0.418077767 | 0.681667623 |
| ENSMUSG00000028567 | Txndc12  | -0.068829747 | 0.418277382 | 0.681903579 |
| ENSMUSG00000107145 | Gm43442  | -0.04309318  | 0.418495938 | 0.682170347 |
| ENSMUSG00000021193 | Pitrm1   | -0.072851698 | 0.418765173 | 0.682510978 |
| ENSMUSG00000052837 | Junb     | 0.070898152  | 0.418814804 | 0.682510978 |
| ENSMUSG00000030956 | Fam53b   | -0.05391027  | 0.419102723 | 0.682711465 |
| ENSMUSG00000075391 | Gm13443  | 0.07383411   | 0.419083521 | 0.682711465 |
| ENSMUSG00000110669 | Gm10060  | -0.049841803 | 0.419083335 | 0.682711465 |
| ENSMUSG00000019864 | Rtn4ip1  | -0.071792703 | 0.419379285 | 0.683028486 |
| ENSMUSG00000050628 | Ubald2   | -0.052087517 | 0.419462305 | 0.683028486 |
| ENSMUSG00000071645 | Tut1     | -0.069952569 | 0.419458604 | 0.683028486 |
| ENSMUSG00000020840 | Blmh     | 0.061255001  | 0.419642584 | 0.683232473 |
| ENSMUSG00000032557 | Uba5     | 0.068631031  | 0.41985878  | 0.683494876 |
| ENSMUSG00000069565 | Dazap1   | -0.060981934 | 0.420050522 | 0.683717408 |
| ENSMUSG00000089872 | Rps6kc1  | -0.054001302 | 0.420216408 | 0.683897798 |
| ENSMUSG00000041346 | Wrap53   | 0.072449978  | 0.420425456 | 0.68414838  |
| ENSMUSG00000037344 | Slc12a9  | -0.069220532 | 0.420661037 | 0.684442066 |
| ENSMUSG00000006134 | Crkl     | -0.070530436 | 0.420790118 | 0.684562417 |
| ENSMUSG00000002455 | Prpf6    | 0.073446357  | 0.42100221  | 0.684728094 |
| ENSMUSG00000074166 | AW146154 | -0.073134961 | 0.420959858 | 0.684728094 |
| ENSMUSG00000040713 | Creg1    | 0.060353068  | 0.421377028 | 0.68524798  |
| ENSMUSG00000013822 | Elof1    | 0.072048161  | 0.421546394 | 0.685433665 |
| ENSMUSG00000006288 | Ttc5     | -0.073031727 | 0.42166984  | 0.685544644 |
| ENSMUSG00000069899 | Gm12166  | 0.056108242  | 0.421801682 | 0.685669243 |
| ENSMUSG00000094083 | Gm1604a  | 0.073008877  | 0.421900463 | 0.685740075 |
| ENSMUSG00000026956 | Uap1l1   | 0.063992534  | 0.422130911 | 0.685865917 |
| ENSMUSG00000029810 | Tmem176b | -0.067216706 | 0.422143542 | 0.685865917 |
| ENSMUSG00000094796 | BC147527 | -0.067199468 | 0.422042087 | 0.685865917 |
| ENSMUSG00000040524 | Zfp609   | 0.053291145  | 0.422269592 | 0.685980985 |
| ENSMUSG00000028701 | Lurap1   | -0.016901787 | 0.422362076 | 0.686041499 |
| ENSMUSG00000027495 | Fam210b  | 0.06867649   | 0.422504143 | 0.686182527 |
| ENSMUSG00000049882 | Vcpkmt   | -0.041797712 | 0.422626461 | 0.686291446 |
| ENSMUSG00000003849 | Nqo1     | 0.048460879  | 0.423040853 | 0.686787408 |
| ENSMUSG00000016024 | Lbp      | 0.072425581  | 0.423097758 | 0.686787408 |
| ENSMUSG00000031592 | Pcm1     | 0.073300122  | 0.423048121 | 0.686787408 |
| ENSMUSG00000035868 | Zfp983   | -0.070874019 | 0.423196348 | 0.686857683 |

|                    |               |              |             |             |
|--------------------|---------------|--------------|-------------|-------------|
| ENSMUSG00000074359 | Psg23         | -0.039009332 | 0.423261099 | 0.686873023 |
| ENSMUSG00000033943 | Mga           | 0.054998597  | 0.423447601 | 0.687085912 |
| ENSMUSG00000031125 | 3830403N18Rik | -0.036047259 | 0.423560602 | 0.687179498 |
| ENSMUSG00000035139 | Secisbp2      | -0.070465388 | 0.423642126 | 0.687222    |
| ENSMUSG00000066042 | Med18         | 0.071917432  | 0.423869802 | 0.687501542 |
| ENSMUSG00000000915 | Hip1r         | -0.052128237 | 0.424043814 | 0.687538883 |
| ENSMUSG00000002814 | Top3a         | -0.079084803 | 0.424280295 | 0.687538883 |
| ENSMUSG00000007777 | 0610009B22Rik | -0.072660958 | 0.424041628 | 0.687538883 |
| ENSMUSG00000020536 | Llgl1         | -0.066406692 | 0.424196837 | 0.687538883 |
| ENSMUSG00000022828 | Gtf2e1        | 0.071318989  | 0.424227343 | 0.687538883 |
| ENSMUSG00000029366 | Dck           | 0.072452727  | 0.424097376 | 0.687538883 |
| ENSMUSG00000106268 | Gm18492       | -0.05225245  | 0.42424788  | 0.687538883 |
| ENSMUSG00000111184 | Gm49661       | 0.042880455  | 0.424414843 | 0.687667201 |
| ENSMUSG00000029823 | Luc7l2        | -0.071577191 | 0.424655935 | 0.687968093 |
| ENSMUSG00000073557 | Ppp1r12b      | -0.056571781 | 0.424868767 | 0.68822313  |
| ENSMUSG00000028878 | Fam76a        | 0.073121468  | 0.424945998 | 0.688224467 |
| ENSMUSG00000037447 | Arid5a        | -0.071178179 | 0.424980409 | 0.688224467 |
| ENSMUSG00000028082 | Sh3d19        | -0.068520313 | 0.425298049 | 0.688559315 |
| ENSMUSG00000079557 | March2        | -0.068501842 | 0.425256229 | 0.688559315 |
| ENSMUSG00000051147 | Nat2          | 0.059754666  | 0.425413319 | 0.688656175 |
| ENSMUSG00000052684 | Jun           | -0.066897599 | 0.425521969 | 0.688742295 |
| ENSMUSG00000024959 | Bad           | 0.064436691  | 0.425603486 | 0.688762504 |
| ENSMUSG00000035941 | Ibtk          | 0.064041186  | 0.425645357 | 0.688762504 |
| ENSMUSG00000025766 | D3Erttd751e   | 0.072826728  | 0.42585488  | 0.689011784 |
| ENSMUSG00000018995 | Nars2         | 0.070498165  | 0.425915896 | 0.689013141 |
| ENSMUSG00000052794 | 1700030K09Rik | 0.048778127  | 0.425966662 | 0.689013141 |
| ENSMUSG00000025607 | Copg2         | 0.050689121  | 0.42634017  | 0.689347989 |
| ENSMUSG00000026024 | Als2          | 0.071513153  | 0.426317419 | 0.689347989 |
| ENSMUSG00000027381 | Bcl2l11       | -0.064628892 | 0.426301304 | 0.689347989 |
| ENSMUSG00000040693 | Slco4c1       | 0.054532648  | 0.426453464 | 0.689441426 |
| ENSMUSG00000048000 | Gigyf2        | -0.062293815 | 0.426567177 | 0.689535516 |
| ENSMUSG00000043671 | Dpy19l3       | -0.069262375 | 0.426796252 | 0.689816038 |
| ENSMUSG00000002014 | Ssr4          | 0.06503511   | 0.42702113  | 0.689987872 |
| ENSMUSG00000002778 | Kdelr1        | 0.061454765  | 0.427069218 | 0.689987872 |
| ENSMUSG00000082321 | Gm14253       | 0.008858525  | 0.427029719 | 0.689987872 |
| ENSMUSG00000075581 | Gm16409       | 0.022282811  | 0.427159217 | 0.690043522 |
| ENSMUSG00000029821 | Gsdme         | -0.071807314 | 0.427582675 | 0.690637764 |
| ENSMUSG00000029016 | Clcn6         | -0.047317868 | 0.427778133 | 0.690773815 |
| ENSMUSG00000064030 | Pym1          | -0.063081859 | 0.427759175 | 0.690773815 |
| ENSMUSG00000079038 | D130040H23Rik | -0.057876012 | 0.427882192 | 0.690852036 |
| ENSMUSG00000026790 | Odf2          | -0.063998035 | 0.427982852 | 0.690924747 |
| ENSMUSG00000021595 | Nsun2         | 0.070821945  | 0.428184586 | 0.691160591 |
| ENSMUSG00000070025 | Gm10284       | 0.029114147  | 0.42835479  | 0.691345484 |

|                    |            |              |             |             |
|--------------------|------------|--------------|-------------|-------------|
| ENSMUSG00000019804 | Snx3       | 0.059176478  | 0.42856437  | 0.691483756 |
| ENSMUSG00000029190 | D5Ertd579e | 0.072310078  | 0.428641546 | 0.691483756 |
| ENSMUSG00000040274 | Cdk6       | 0.068883801  | 0.428663145 | 0.691483756 |
| ENSMUSG00000113069 | Gm48541    | 0.030973161  | 0.428625747 | 0.691483756 |
| ENSMUSG00000034522 | Zfp395     | -0.035845597 | 0.428836609 | 0.691583941 |
| ENSMUSG00000049488 | Tmem67     | -0.067304757 | 0.42878867  | 0.691583941 |
| ENSMUSG00000032602 | Slc25a20   | 0.0721866    | 0.428985676 | 0.69173453  |
| ENSMUSG00000070284 | Gmppb      | -0.071696089 | 0.429311555 | 0.692170149 |
| ENSMUSG00000023845 | Lnpep      | -0.072060408 | 0.429496307 | 0.692288299 |
| ENSMUSG00000041632 | Mrps27     | 0.072076292  | 0.429473819 | 0.692288299 |
| ENSMUSG00000020131 | Pcsk4      | 0.070630575  | 0.429576568 | 0.692327825 |
| ENSMUSG00000020023 | Tmcc3      | -0.032925532 | 0.429700334 | 0.692347626 |
| ENSMUSG00000083914 | Rps18-ps1  | 0.035487199  | 0.429684498 | 0.692347626 |
| ENSMUSG00000024660 | Incenp     | -0.07092156  | 0.430246718 | 0.693066802 |
| ENSMUSG00000066415 | Msl2       | -0.065610666 | 0.430258281 | 0.693066802 |
| ENSMUSG00000030733 | Sh2b1      | -0.067463255 | 0.430533003 | 0.693419402 |
| ENSMUSG00000020330 | Hmmr       | 0.079297016  | 0.430950547 | 0.694001912 |
| ENSMUSG00000009927 | Rps25      | 0.068294915  | 0.431095134 | 0.694144758 |
| ENSMUSG00000022387 | Brd1       | -0.070716079 | 0.431532734 | 0.694603582 |
| ENSMUSG00000035208 | Slfn8      | -0.049464225 | 0.43154785  | 0.694603582 |
| ENSMUSG00000038459 | Abhd17c    | -0.07135222  | 0.431523476 | 0.694603582 |
| ENSMUSG00000001229 | Dpp9       | -0.07140021  | 0.432330329 | 0.695480846 |
| ENSMUSG00000005054 | Cstb       | 0.05852955   | 0.432353533 | 0.695480846 |
| ENSMUSG00000019891 | Dcbld1     | -0.041617473 | 0.432375506 | 0.695480846 |
| ENSMUSG00000034248 | Slc25a37   | -0.047586305 | 0.432237637 | 0.695480846 |
| ENSMUSG00000036983 | Tfb1m      | 0.069791971  | 0.432492656 | 0.695480846 |
| ENSMUSG00000042303 | Sgsm3      | -0.070845783 | 0.432596813 | 0.695480846 |
| ENSMUSG00000042305 | Tmem183a   | 0.069188983  | 0.432456705 | 0.695480846 |
| ENSMUSG00000054945 | Gm9958     | -0.037506956 | 0.432591779 | 0.695480846 |
| ENSMUSG00000083619 | Gm14414    | 0.054158011  | 0.432360822 | 0.695480846 |
| ENSMUSG00000039048 | Foxred1    | -0.070785666 | 0.432780973 | 0.695596851 |
| ENSMUSG00000058407 | Txndc9     | 0.067838417  | 0.432774023 | 0.695596851 |
| ENSMUSG00000018567 | Gabarap    | -0.071484767 | 0.43308326  | 0.695722603 |
| ENSMUSG00000047953 | Gp5        | 0.044493061  | 0.433041755 | 0.695722603 |
| ENSMUSG00000079339 | Ifit1bl1   | 0.034744258  | 0.432916954 | 0.695722603 |
| ENSMUSG00000095098 | Ccdc85b    | -0.07081735  | 0.433017453 | 0.695722603 |
| ENSMUSG00000008540 | Mgst1      | -0.071915135 | 0.433721877 | 0.695848545 |
| ENSMUSG00000020580 | Rock2      | -0.066334649 | 0.433508791 | 0.695848545 |
| ENSMUSG00000022516 | Nudt16l1   | 0.061620803  | 0.433570107 | 0.695848545 |
| ENSMUSG00000028957 | Per3       | -0.064100616 | 0.433708896 | 0.695848545 |
| ENSMUSG00000038594 | Cep85l     | 0.067493901  | 0.433295465 | 0.695848545 |
| ENSMUSG00000041997 | Tlk1       | 0.072467617  | 0.433633603 | 0.695848545 |
| ENSMUSG00000054640 | Slc8a1     | 0.026343579  | 0.433629202 | 0.695848545 |

|                    |          |              |             |             |
|--------------------|----------|--------------|-------------|-------------|
| ENSMUSG00000055436 | Srsf11   | 0.069024888  | 0.433483672 | 0.695848545 |
| ENSMUSG00000062421 | Arf2     | 0.07052275   | 0.433295737 | 0.695848545 |
| ENSMUSG00000078671 | Chd2     | -0.069228529 | 0.433539963 | 0.695848545 |
| ENSMUSG00000044026 | Slc35g1  | 0.07053023   | 0.434121657 | 0.696399987 |
| ENSMUSG00000020955 | Ap4s1    | 0.067704667  | 0.434375445 | 0.696627166 |
| ENSMUSG00000115577 | Gm49250  | -0.040143656 | 0.434332485 | 0.696627166 |
| ENSMUSG00000059743 | Fdps     | 0.071377701  | 0.434488125 | 0.696717919 |
| ENSMUSG00000044442 | N6amt1   | 0.071950639  | 0.434678183 | 0.696932711 |
| ENSMUSG00000026662 | Sephs1   | -0.067423576 | 0.43477021  | 0.696990292 |
| ENSMUSG00000005233 | Spc25    | -0.068022435 | 0.435384814 | 0.697255644 |
| ENSMUSG00000024277 | Mapre2   | -0.070125688 | 0.435246161 | 0.697255644 |
| ENSMUSG00000026174 | Cnot9    | -0.067426806 | 0.435262654 | 0.697255644 |
| ENSMUSG00000031600 | Vps37a   | -0.070450462 | 0.435289212 | 0.697255644 |
| ENSMUSG00000044024 | Rell2    | -0.040286032 | 0.43534613  | 0.697255644 |
| ENSMUSG00000054920 | Klhl5    | -0.066942173 | 0.435161386 | 0.697255644 |
| ENSMUSG00000059273 | Zc3h4    | -0.05243528  | 0.435105165 | 0.697255644 |
| ENSMUSG00000109378 | Gm49396  | -0.044094015 | 0.435202805 | 0.697255644 |
| ENSMUSG00000021890 | Eaf1     | -0.06853905  | 0.435599246 | 0.697267075 |
| ENSMUSG00000038963 | Slco4a1  | -0.070997549 | 0.435587894 | 0.697267075 |
| ENSMUSG00000055723 | Rras2    | 0.055435568  | 0.435616497 | 0.697267075 |
| ENSMUSG00000057229 | Dmac2    | -0.064833201 | 0.435552933 | 0.697267075 |
| ENSMUSG00000030337 | Vamp1    | -0.040242637 | 0.4359314   | 0.697681217 |
| ENSMUSG00000108162 | Gm20589  | -0.037643109 | 0.4359963   | 0.697695187 |
| ENSMUSG00000004446 | Bid      | -0.066707194 | 0.436170378 | 0.697723798 |
| ENSMUSG00000049686 | Orai1    | -0.062872931 | 0.436182698 | 0.697723798 |
| ENSMUSG00000049969 | Plekhf2  | -0.066052004 | 0.436111238 | 0.697723798 |
| ENSMUSG00000078789 | Dph1     | 0.071089274  | 0.436352319 | 0.697905248 |
| ENSMUSG00000026775 | Yme1l1   | -0.069668764 | 0.436884228 | 0.698398193 |
| ENSMUSG00000036561 | Ppp6r2   | -0.047864764 | 0.436771727 | 0.698398193 |
| ENSMUSG00000038213 | Tapbp1   | -0.064814157 | 0.43694166  | 0.698398193 |
| ENSMUSG00000079710 | Gm3448   | -0.047776538 | 0.436882647 | 0.698398193 |
| ENSMUSG00000081534 | Slc48a1  | -0.064438951 | 0.43688787  | 0.698398193 |
| ENSMUSG00000003438 | Timm50   | 0.067905707  | 0.43707699  | 0.698446297 |
| ENSMUSG00000024228 | Nudt12   | -0.048960772 | 0.437084218 | 0.698446297 |
| ENSMUSG00000042595 | Fam199x  | 0.05154106   | 0.437441985 | 0.698917082 |
| ENSMUSG00000066553 | Gm6969   | 0.05525806   | 0.437491371 | 0.698917082 |
| ENSMUSG00000031622 | Sin3b    | 0.062028225  | 0.437658488 | 0.698977045 |
| ENSMUSG00000049687 | Pheta2   | -0.059310457 | 0.437693919 | 0.698977045 |
| ENSMUSG00000098076 | Gm6981   | 0.042759202  | 0.437697726 | 0.698977045 |
| ENSMUSG00000016757 | Ttll12   | -0.068043422 | 0.437904892 | 0.699010713 |
| ENSMUSG00000034220 | Gpc1     | -0.058790577 | 0.437782411 | 0.699010713 |
| ENSMUSG00000061046 | Haghl    | 0.066867949  | 0.437865366 | 0.699010713 |
| ENSMUSG00000061619 | Vma21-ps | 0.063056442  | 0.437943915 | 0.699010713 |

|                    |            |              |             |             |
|--------------------|------------|--------------|-------------|-------------|
| ENSMUSG00000046341 | Gm11223    | 0.058649021  | 0.438003736 | 0.69901637  |
| ENSMUSG00000005907 | Pex1       | 0.070027543  | 0.438315279 | 0.699330946 |
| ENSMUSG00000023883 | Phf10      | 0.069007268  | 0.438363063 | 0.699330946 |
| ENSMUSG00000030245 | Golt1b     | 0.069079497  | 0.438369757 | 0.699330946 |
| ENSMUSG00000035151 | Elmod2     | -0.055224922 | 0.438468469 | 0.699398595 |
| ENSMUSG00000068015 | Lrch1      | -0.054194845 | 0.438611213 | 0.69953645  |
| ENSMUSG00000000838 | Fmr1       | 0.066826004  | 0.438846463 | 0.699821789 |
| ENSMUSG00000001786 | Fbxo7      | -0.069779312 | 0.439262938 | 0.699944336 |
| ENSMUSG00000032329 | Hmg20a     | -0.07032383  | 0.439116871 | 0.699944336 |
| ENSMUSG00000033047 | Eif3l      | 0.063164113  | 0.439157833 | 0.699944336 |
| ENSMUSG00000033949 | Trim36     | -0.040067394 | 0.439264159 | 0.699944336 |
| ENSMUSG00000034826 | Nup54      | -0.064746407 | 0.439239923 | 0.699944336 |
| ENSMUSG00000038822 | Hace1      | -0.062349425 | 0.43911339  | 0.699944336 |
| ENSMUSG00000047123 | Ticam1     | -0.057514795 | 0.439317772 | 0.699944336 |
| ENSMUSG00000003680 | Taf6l      | -0.069832768 | 0.439474322 | 0.700014177 |
| ENSMUSG00000046982 | Tshz1      | -0.06863839  | 0.439449855 | 0.700014177 |
| ENSMUSG00000025223 | Ldb1       | -0.060684599 | 0.439652692 | 0.700208499 |
| ENSMUSG00000025410 | Dctn2      | 0.069353403  | 0.439721531 | 0.70022835  |
| ENSMUSG00000070855 | Olfr1116   | -0.042272057 | 0.439984143 | 0.700556728 |
| ENSMUSG00000033429 | Mcee       | 0.060058169  | 0.440396617 | 0.701033754 |
| ENSMUSG00000090035 | Galnt4     | -0.068072108 | 0.440377423 | 0.701033754 |
| ENSMUSG00000024670 | Cd6        | 0.040625982  | 0.440583767 | 0.701241795 |
| ENSMUSG00000036523 | Greb1      | 0.023154616  | 0.440787144 | 0.701475607 |
| ENSMUSG00000000826 | Dnajc5     | 0.067467236  | 0.440866593 | 0.701512164 |
| ENSMUSG00000025257 | Ribc1      | 0.03439064   | 0.44092623  | 0.70151719  |
| ENSMUSG00000025195 | Dnmbp      | -0.0650297   | 0.441008444 | 0.701558131 |
| ENSMUSG00000025050 | Pcgf6      | 0.06842025   | 0.441249783 | 0.701701508 |
| ENSMUSG00000058174 | Gm5148     | 0.068480958  | 0.441164198 | 0.701701508 |
| ENSMUSG00000095403 | Gm21092    | -0.039570796 | 0.441268053 | 0.701701508 |
| ENSMUSG00000030629 | Zfand6     | -0.062231091 | 0.441544318 | 0.702050945 |
| ENSMUSG00000002997 | Prkar2b    | 0.063010132  | 0.44185465  | 0.702364552 |
| ENSMUSG00000027937 | Jtb        | 0.062344159  | 0.441831956 | 0.702364552 |
| ENSMUSG00000025790 | Slco3a1    | -0.068591518 | 0.442036173 | 0.702473299 |
| ENSMUSG00000026819 | Slc25a25   | -0.050080674 | 0.44198845  | 0.702473299 |
| ENSMUSG00000116340 | AC225888.1 | 0.052152387  | 0.442203591 | 0.702649457 |
| ENSMUSG00000046519 | Golph3l    | -0.069481808 | 0.442460326 | 0.702967473 |
| ENSMUSG00000025571 | Tnrc6c     | 0.061387295  | 0.442665038 | 0.703202767 |
| ENSMUSG00000066877 | Nck2       | -0.064149128 | 0.442723789 | 0.703206162 |
| ENSMUSG00000024104 | Washc2     | 0.064933674  | 0.442782146 | 0.703208929 |
| ENSMUSG00000028411 | Aptx       | 0.06992736   | 0.443057156 | 0.703472391 |
| ENSMUSG00000054484 | Tmem62     | 0.06507729   | 0.443061308 | 0.703472391 |
| ENSMUSG00000030162 | Olr1       | 0.062962851  | 0.443241902 | 0.703669181 |
| ENSMUSG00000033499 | Larp4b     | -0.067776889 | 0.443301092 | 0.703673209 |

|                     |               |              |             |             |
|---------------------|---------------|--------------|-------------|-------------|
| ENSMUSG00000001576  | Ergic1        | 0.068387662  | 0.44357405  | 0.704016519 |
| ENSMUSG000000046139 | Patl1         | -0.069225868 | 0.444035384 | 0.704589586 |
| ENSMUSG000000063172 | Hspb11        | -0.06244398  | 0.444048569 | 0.704589586 |
| ENSMUSG000000025574 | Tk1           | 0.059369345  | 0.444326952 | 0.704941254 |
| ENSMUSG000000049536 | Tceal1        | -0.035302999 | 0.444970046 | 0.705871384 |
| ENSMUSG000000070427 | Il18bp        | 0.046977012  | 0.44503384  | 0.705882433 |
| ENSMUSG000000072694 | 1500011B03Rik | 0.070546859  | 0.445114417 | 0.705920093 |
| ENSMUSG000000021123 | Rdh12         | 0.069318312  | 0.445353007 | 0.705994795 |
| ENSMUSG000000028719 | Cmpk1         | 0.056132214  | 0.445388875 | 0.705994795 |
| ENSMUSG000000039783 | Kmo           | -0.065503197 | 0.445250031 | 0.705994795 |
| ENSMUSG000000074151 | Nlrc5         | -0.048914142 | 0.445312271 | 0.705994795 |
| ENSMUSG000000029469 | Ift81         | -0.052087356 | 0.445522536 | 0.706026464 |
| ENSMUSG000000037119 | Fam91a1       | 0.065449741  | 0.445486245 | 0.706026464 |
| ENSMUSG000000005824 | Tnfsf14       | 0.069052709  | 0.445674252 | 0.70605049  |
| ENSMUSG000000026096 | Osgepl1       | 0.069029114  | 0.445729658 | 0.70605049  |
| ENSMUSG000000027962 | Vcam1         | -0.069020959 | 0.445614134 | 0.70605049  |
| ENSMUSG000000035399 | Oser1         | -0.069011797 | 0.44576507  | 0.70605049  |
| ENSMUSG000000039450 | Dcxr          | -0.063523863 | 0.445916868 | 0.70620087  |
| ENSMUSG000000025049 | Taf5          | 0.061930173  | 0.446000138 | 0.706242696 |
| ENSMUSG000000074213 | Gm10642       | -0.034890257 | 0.446081249 | 0.706281096 |
| ENSMUSG000000031608 | Galnt7        | 0.069316671  | 0.446210077 | 0.706395025 |
| ENSMUSG000000027498 | Cstf1         | -0.069361024 | 0.446408229 | 0.706396473 |
| ENSMUSG000000037656 | Slc20a2       | -0.068135683 | 0.446354991 | 0.706396473 |
| ENSMUSG000000045316 | Fahd1         | 0.06684523   | 0.446438476 | 0.706396473 |
| ENSMUSG00000113240  | Gm48338       | 0.046709947  | 0.446382151 | 0.706396473 |
| ENSMUSG000000026177 | Slc11a1       | 0.029104239  | 0.446525532 | 0.706412596 |
| ENSMUSG000000040957 | Cables1       | -0.068532107 | 0.44656241  | 0.706412596 |
| ENSMUSG000000025959 | Klf7          | -0.05798032  | 0.446949591 | 0.706904323 |
| ENSMUSG000000037808 | Fam76b        | 0.063855859  | 0.446987082 | 0.706904323 |
| ENSMUSG000000060032 | H2afj         | -0.067536587 | 0.447102126 | 0.706996246 |
| ENSMUSG000000005566 | Trim28        | 0.066136339  | 0.447385551 | 0.707303316 |
| ENSMUSG000000022313 | Utp23         | 0.069460347  | 0.447505825 | 0.707303316 |
| ENSMUSG000000026213 | Stk11ip       | -0.046796085 | 0.447629492 | 0.707303316 |
| ENSMUSG000000028653 | Trit1         | -0.068927991 | 0.447637981 | 0.707303316 |
| ENSMUSG000000031698 | Mylk3         | 0.021385623  | 0.447598503 | 0.707303316 |
| ENSMUSG000000091905 | Gm6395        | -0.068348404 | 0.447442547 | 0.707303316 |
| ENSMUSG000000074277 | Phldb3        | -0.03787643  | 0.447826966 | 0.707511924 |
| ENSMUSG000000028398 | Dmac1         | 0.059715372  | 0.448271947 | 0.707987269 |
| ENSMUSG000000038569 | Rad9b         | -0.040892893 | 0.448355838 | 0.707987269 |
| ENSMUSG000000039997 | Ifi203        | 0.068633842  | 0.448263    | 0.707987269 |
| ENSMUSG000000062081 | Gm6055        | 0.067754166  | 0.448319587 | 0.707987269 |
| ENSMUSG000000024181 | Mrpl28        | 0.066861776  | 0.448716072 | 0.708375995 |
| ENSMUSG000000081071 | Gm9836        | -0.06903188  | 0.448665176 | 0.708375995 |

|                     |           |              |             |             |
|---------------------|-----------|--------------|-------------|-------------|
| ENSMUSG0000000326   | Comt      | 0.058928183  | 0.449044511 | 0.708804406 |
| ENSMUSG00000002015  | Bcap31    | 0.069181622  | 0.449176251 | 0.708884747 |
| ENSMUSG000000026360 | Rgs2      | 0.066573582  | 0.449258202 | 0.708884747 |
| ENSMUSG000000053730 | Tmem39b   | -0.06304313  | 0.449266623 | 0.708884747 |
| ENSMUSG000000038205 | Prkab2    | -0.03930559  | 0.449353007 | 0.708930992 |
| ENSMUSG000000039738 | Slx4      | 0.054243494  | 0.449578927 | 0.709197339 |
| ENSMUSG000000021635 | Rad17     | -0.064017177 | 0.449850297 | 0.709380478 |
| ENSMUSG000000024603 | Dctn4     | 0.067876392  | 0.449922219 | 0.709380478 |
| ENSMUSG000000031220 | Awat2     | 0.040393067  | 0.449923469 | 0.709380478 |
| ENSMUSG000000036721 | Zscan12   | -0.06777687  | 0.449770611 | 0.709380478 |
| ENSMUSG000000039530 | Tusc3     | 0.067730072  | 0.450055202 | 0.709498117 |
| ENSMUSG000000031583 | Wrn       | 0.068825346  | 0.450222602 | 0.709582486 |
| ENSMUSG000000068732 | Tmem167b  | -0.068228142 | 0.450222975 | 0.709582486 |
| ENSMUSG000000046962 | Zbtb21    | -0.066106776 | 0.450313945 | 0.709635816 |
| ENSMUSG000000023030 | Slc11a2   | -0.067609598 | 0.450545957 | 0.70991137  |
| ENSMUSG000000046185 | Zfp84     | -0.06827358  | 0.450877984 | 0.710344424 |
| ENSMUSG000000022023 | Wbp4      | 0.061488858  | 0.451073718 | 0.710524436 |
| ENSMUSG000000055692 | Tmem191c  | -0.068214416 | 0.45110665  | 0.710524436 |
| ENSMUSG000000020277 | Pfkl      | -0.066932551 | 0.451181068 | 0.710551547 |
| ENSMUSG00000002580  | Mien1     | 0.060206014  | 0.451454316 | 0.710891742 |
| ENSMUSG000000039910 | Cited2    | -0.068611595 | 0.451558686 | 0.710965958 |
| ENSMUSG000000004561 | Mettl17   | -0.066773566 | 0.451738152 | 0.710978153 |
| ENSMUSG000000029571 | Tmem106b  | 0.065971109  | 0.451656419 | 0.710978153 |
| ENSMUSG000000034021 | Pds5b     | 0.067369645  | 0.451693539 | 0.710978153 |
| ENSMUSG000000037348 | Paqr7     | -0.067889907 | 0.452005283 | 0.711048353 |
| ENSMUSG000000039218 | Srrm2     | 0.068237887  | 0.451913704 | 0.711048353 |
| ENSMUSG000000051721 | Wdcp      | 0.066545201  | 0.452000589 | 0.711048353 |
| ENSMUSG000000079962 | Gm12643   | 0.039419532  | 0.452011738 | 0.711048353 |
| ENSMUSG000000027353 | Mcm8      | -0.068002812 | 0.452102149 | 0.711084071 |
| ENSMUSG000000028484 | Psip1     | 0.062317297  | 0.452250336 | 0.711084071 |
| ENSMUSG000000029048 | Rer1      | 0.06115725   | 0.452186665 | 0.711084071 |
| ENSMUSG000000029104 | Htt       | 0.053722816  | 0.452263438 | 0.711084071 |
| ENSMUSG000000020777 | Acox1     | -0.067280681 | 0.452388578 | 0.711094917 |
| ENSMUSG000000025036 | Sfxn2     | 0.065838122  | 0.452440317 | 0.711094917 |
| ENSMUSG000000026031 | Cflar     | -0.064468194 | 0.452442084 | 0.711094917 |
| ENSMUSG000000025266 | Gnl3l     | 0.065697058  | 0.452507191 | 0.711107264 |
| ENSMUSG000000073198 | Bnip3l-ps | -0.066744001 | 0.452629102 | 0.711208865 |
| ENSMUSG000000030177 | Ccdc77    | -0.067746338 | 0.452997603 | 0.711623299 |
| ENSMUSG00000101939  | Gm28438   | -0.05702427  | 0.453007441 | 0.711623299 |
| ENSMUSG000000042501 | Cpa6      | 0.037001793  | 0.453562703 | 0.712345414 |
| ENSMUSG000000050912 | Tmem123   | -0.063217026 | 0.453581828 | 0.712345414 |
| ENSMUSG000000026048 | Erc5      | 0.063389866  | 0.453687708 | 0.712394585 |
| ENSMUSG000000056458 | Mok       | -0.060800135 | 0.453727845 | 0.712394585 |

|                    |               |              |             |             |
|--------------------|---------------|--------------|-------------|-------------|
| ENSMUSG00000058267 | Mrps14        | 0.077346834  | 0.453912019 | 0.712589929 |
| ENSMUSG00000076621 | Ighj1         | -0.04064391  | 0.453967    | 0.712589929 |
| ENSMUSG00000041921 | Metap1d       | 0.067747124  | 0.454501625 | 0.713338979 |
| ENSMUSG00000021211 | Akr1c12       | -0.055186979 | 0.454748618 | 0.713465077 |
| ENSMUSG00000024132 | Eci1          | 0.066693676  | 0.454665879 | 0.713465077 |
| ENSMUSG00000043207 | Zmpste24      | 0.066701712  | 0.454754288 | 0.713465077 |
| ENSMUSG00000029387 | Gtf2h3        | 0.06794307   | 0.455022358 | 0.713795492 |
| ENSMUSG00000024036 | Slc37a1       | -0.067817436 | 0.455125482 | 0.713867106 |
| ENSMUSG00000002846 | Timmcdc1      | -0.045771148 | 0.455405431 | 0.71412585  |
| ENSMUSG00000070733 | Fryl          | 0.057311401  | 0.455393615 | 0.71412585  |
| ENSMUSG00000092305 | Prps1l1       | 0.03114836   | 0.455527144 | 0.714226541 |
| ENSMUSG00000042712 | Tceal9        | 0.058812579  | 0.455629209 | 0.714296404 |
| ENSMUSG00000033985 | Tesk2         | -0.056602562 | 0.455797208 | 0.714469601 |
| ENSMUSG00000019027 | Dnah1         | 0.042501794  | 0.455908954 | 0.714554589 |
| ENSMUSG00000038007 | Acer2         | 0.034032893  | 0.456084185 | 0.714648878 |
| ENSMUSG00000040022 | Rab11fip2     | -0.064584677 | 0.456042957 | 0.714648878 |
| ENSMUSG00000038042 | Ptpdc1        | -0.032083365 | 0.456153415 | 0.714667202 |
| ENSMUSG00000111375 | Btbd8         | -0.051063334 | 0.456481853 | 0.715091574 |
| ENSMUSG00000032103 | Pus3          | 0.067742094  | 0.45658826  | 0.715168067 |
| ENSMUSG00000016344 | Ppdpf         | 0.058528919  | 0.456920613 | 0.715508186 |
| ENSMUSG00000032388 | Spg21         | -0.065299261 | 0.456888023 | 0.715508186 |
| ENSMUSG00000046994 | Mars2         | 0.066547176  | 0.457037057 | 0.715600313 |
| ENSMUSG00000029557 | Mrm2          | 0.065283688  | 0.457165211 | 0.715631049 |
| ENSMUSG00000090258 | Churc1        | -0.064656818 | 0.457171916 | 0.715631049 |
| ENSMUSG00000007039 | Ddah2         | -0.044480157 | 0.457319792 | 0.71577232  |
| ENSMUSG00000022586 | Ly6i          | -0.058195358 | 0.457502119 | 0.715787104 |
| ENSMUSG00000026879 | Gsn           | -0.064063929 | 0.457445935 | 0.715787104 |
| ENSMUSG00000090841 | Myl6          | 0.053253588  | 0.457435149 | 0.715787104 |
| ENSMUSG00000019945 | Cabcoco1      | 0.050497133  | 0.457721102 | 0.715859206 |
| ENSMUSG00000025156 | Gps1          | -0.060732509 | 0.45762994  | 0.715859206 |
| ENSMUSG00000097906 | Gm9625        | 0.037146491  | 0.457703692 | 0.715859206 |
| ENSMUSG00000027305 | Ndufaf1       | 0.058914583  | 0.457791225 | 0.715878737 |
| ENSMUSG00000031355 | Arhgap6       | -0.034554234 | 0.457982733 | 0.716088058 |
| ENSMUSG00000026820 | Ptges2        | -0.066050697 | 0.458216059 | 0.716182418 |
| ENSMUSG00000031601 | Cnot7         | 0.067657501  | 0.458175648 | 0.716182418 |
| ENSMUSG00000036916 | Zfp280c       | 0.067504172  | 0.458201118 | 0.716182418 |
| ENSMUSG00000025651 | Uqcrc1        | 0.06759302   | 0.458437285 | 0.716265373 |
| ENSMUSG00000031938 | 4931406C07Rik | -0.064631665 | 0.45843939  | 0.716265373 |
| ENSMUSG00000038738 | Shank1        | -0.066588212 | 0.458499797 | 0.716265373 |
| ENSMUSG00000040195 | Nemp1         | -0.065418812 | 0.458463879 | 0.716265373 |
| ENSMUSG00000029433 | Diablo        | 0.058543476  | 0.458914536 | 0.716818417 |
| ENSMUSG00000038398 | Upf3a         | 0.062924156  | 0.458969235 | 0.716818417 |
| ENSMUSG00000029480 | Dhx37         | 0.067336387  | 0.459205385 | 0.717097069 |

|                    |           |              |             |             |
|--------------------|-----------|--------------|-------------|-------------|
| ENSMUSG0000002658  | Gtf2f1    | 0.059134606  | 0.459574971 | 0.717147978 |
| ENSMUSG00000020589 | Fam49a    | -0.065913057 | 0.459935833 | 0.717147978 |
| ENSMUSG00000022707 | Gbe1      | -0.063361388 | 0.459321733 | 0.717147978 |
| ENSMUSG00000023953 | Polh      | 0.053986493  | 0.459945462 | 0.717147978 |
| ENSMUSG00000025436 | Atp23     | 0.066430711  | 0.459637872 | 0.717147978 |
| ENSMUSG00000032285 | Dnaja4    | -0.031536942 | 0.459772214 | 0.717147978 |
| ENSMUSG00000035234 | Abraxas1  | -0.068625522 | 0.459876585 | 0.717147978 |
| ENSMUSG00000037470 | Uggt1     | -0.061108521 | 0.459988563 | 0.717147978 |
| ENSMUSG00000052557 | Gan       | -0.051988403 | 0.459381238 | 0.717147978 |
| ENSMUSG00000070565 | Rasal2    | -0.042322476 | 0.459496415 | 0.717147978 |
| ENSMUSG00000072437 | Nanos1    | -0.049898928 | 0.459680897 | 0.717147978 |
| ENSMUSG00000075014 | Gm10800   | -0.014463045 | 0.459829824 | 0.717147978 |
| ENSMUSG00000105827 | Hist2h2bb | -0.051590167 | 0.459554168 | 0.717147978 |
| ENSMUSG00000082705 | Gm15616   | 0.045171926  | 0.460218339 | 0.717416163 |
| ENSMUSG00000079491 | H2-T10    | -0.056325518 | 0.460344051 | 0.717501104 |
| ENSMUSG00000095595 | Fam177a   | 0.05735833   | 0.460388359 | 0.717501104 |
| ENSMUSG00000006301 | Tmbim1    | -0.064611806 | 0.460491418 | 0.717571685 |
| ENSMUSG00000006517 | Mvd       | -0.064201433 | 0.460594337 | 0.717642029 |
| ENSMUSG00000059119 | Nap1l4    | -0.063313383 | 0.460935359 | 0.718083293 |
| ENSMUSG00000019861 | Gopc      | -0.066640774 | 0.46139209  | 0.718083578 |
| ENSMUSG00000020530 | Ggnbp2    | 0.062027429  | 0.461847603 | 0.718083578 |
| ENSMUSG00000020961 | Ston2     | 0.060883271  | 0.461640769 | 0.718083578 |
| ENSMUSG00000024098 | Twsg1     | -0.05881452  | 0.461605941 | 0.718083578 |
| ENSMUSG00000032238 | Rora      | -0.034486504 | 0.461860535 | 0.718083578 |
| ENSMUSG00000036327 | Qsox2     | 0.063163597  | 0.461709686 | 0.718083578 |
| ENSMUSG00000037089 | Slc35b2   | 0.062279276  | 0.461579439 | 0.718083578 |
| ENSMUSG00000037400 | Atp11b    | -0.067023387 | 0.461820118 | 0.718083578 |
| ENSMUSG00000040455 | Usp45     | -0.052864021 | 0.461249977 | 0.718083578 |
| ENSMUSG00000058927 | Gm10053   | 0.067120434  | 0.461354896 | 0.718083578 |
| ENSMUSG00000060791 | Gmfg      | 0.075663575  | 0.461042061 | 0.718083578 |
| ENSMUSG00000063077 | Kif1b     | -0.059082252 | 0.461543464 | 0.718083578 |
| ENSMUSG00000063802 | Hspbp1    | 0.059907558  | 0.461538419 | 0.718083578 |
| ENSMUSG00000083007 | Gm13623   | 0.034034969  | 0.461584599 | 0.718083578 |
| ENSMUSG00000091876 | Gm3851    | 0.063410907  | 0.461193043 | 0.718083578 |
| ENSMUSG00000111594 | Gm3365    | -0.061239239 | 0.461518423 | 0.718083578 |
| ENSMUSG00000055817 | Mta3      | -0.065515459 | 0.461974318 | 0.718170588 |
| ENSMUSG00000041935 | AW549877  | -0.060318106 | 0.462166407 | 0.718245239 |
| ENSMUSG00000043445 | Pgp       | 0.065153051  | 0.462151478 | 0.718245239 |
| ENSMUSG00000049723 | Mmp12     | -0.041642742 | 0.462195813 | 0.718245239 |
| ENSMUSG00000017376 | Nlk       | 0.04259875   | 0.462728428 | 0.718842772 |
| ENSMUSG00000037907 | Ankrd13b  | 0.049458925  | 0.462663214 | 0.718842772 |
| ENSMUSG00000074165 | Zfp788    | 0.061653705  | 0.462753949 | 0.718842772 |
| ENSMUSG00000063358 | Mapk1     | 0.076136087  | 0.462839419 | 0.718885634 |

|                    |               |              |             |             |
|--------------------|---------------|--------------|-------------|-------------|
| ENSMUSG00000009876 | Cox4i2        | -0.040232422 | 0.463193718 | 0.719256054 |
| ENSMUSG00000059588 | Calcl         | 0.032104673  | 0.463142648 | 0.719256054 |
| ENSMUSG00000014402 | Tsg101        | -0.063436745 | 0.463536785 | 0.719632763 |
| ENSMUSG00000022048 | Dpysl2        | -0.063063783 | 0.463552189 | 0.719632763 |
| ENSMUSG00000041837 | Pdcd7         | -0.062490328 | 0.46365073  | 0.719695791 |
| ENSMUSG00000102048 | Gm6075        | 0.041869173  | 0.463761386 | 0.719777605 |
| ENSMUSG00000034459 | Ifit1         | -0.044620988 | 0.46386423  | 0.719847277 |
| ENSMUSG00000003418 | St8sia6       | -0.035718814 | 0.463949193 | 0.719889185 |
| ENSMUSG00000029059 | Fam213b       | -0.064397675 | 0.464089061 | 0.720016267 |
| ENSMUSG00000021569 | Trip13        | 0.06486193   | 0.464157915 | 0.720033154 |
| ENSMUSG00000026917 | Wdr5          | 0.062791851  | 0.464356675 | 0.720251531 |
| ENSMUSG00000049577 | Zfpm1         | -0.024403294 | 0.464504612 | 0.720391033 |
| ENSMUSG00000042472 | Zfp410        | -0.064861694 | 0.46476938  | 0.72071167  |
| ENSMUSG00000001156 | Mxd1          | -0.051055688 | 0.464991287 | 0.720828131 |
| ENSMUSG00000005102 | Eif2ak4       | 0.048481072  | 0.465553892 | 0.720828131 |
| ENSMUSG00000021806 | Nid2          | 0.032460644  | 0.465548982 | 0.720828131 |
| ENSMUSG00000022895 | Ets2          | -0.051331682 | 0.465575487 | 0.720828131 |
| ENSMUSG00000030691 | Fchsd2        | 0.051138815  | 0.465472094 | 0.720828131 |
| ENSMUSG00000036615 | Rfxap         | -0.063605284 | 0.465451893 | 0.720828131 |
| ENSMUSG00000037364 | Srrt          | 0.063681753  | 0.465452976 | 0.720828131 |
| ENSMUSG00000041440 | Gk5           | 0.048380757  | 0.465082021 | 0.720828131 |
| ENSMUSG00000045962 | Wnk1          | 0.06440106   | 0.465321728 | 0.720828131 |
| ENSMUSG00000059811 | Atl2          | -0.065990768 | 0.465002378 | 0.720828131 |
| ENSMUSG00000066632 | Pgk1-rs7      | -0.030698085 | 0.465621509 | 0.720828131 |
| ENSMUSG00000072762 | 4930522L14Rik | -0.065996209 | 0.465656946 | 0.720828131 |
| ENSMUSG00000094786 | Gm14403       | -0.037841529 | 0.465526152 | 0.720828131 |
| ENSMUSG00000096356 | Olfr889       | -0.059919348 | 0.465565466 | 0.720828131 |
| ENSMUSG00000024357 | Sil1          | 0.058758363  | 0.46582809  | 0.72088793  |
| ENSMUSG00000095567 | Noc2l         | -0.062762503 | 0.465851638 | 0.72088793  |
| ENSMUSG00000110545 | Gm7730        | 0.035015534  | 0.465869689 | 0.72088793  |
| ENSMUSG00000054519 | Zfp867        | -0.032417231 | 0.465977034 | 0.720964217 |
| ENSMUSG00000067038 | Rps12-ps3     | 0.064013981  | 0.466232275 | 0.721269284 |
| ENSMUSG00000018659 | Pnpo          | 0.058543155  | 0.466439063 | 0.721319671 |
| ENSMUSG00000029097 | Trmt44        | -0.057431103 | 0.466332338 | 0.721319671 |
| ENSMUSG00000041444 | Arhgap32      | -0.027851916 | 0.466405113 | 0.721319671 |
| ENSMUSG00000027677 | Ttc14         | -0.065005588 | 0.466685725 | 0.721611278 |
| ENSMUSG00000066798 | Zbtb6         | -0.05482927  | 0.466827858 | 0.721741203 |
| ENSMUSG00000115991 | Slfn2         | -0.055440798 | 0.467103438 | 0.722077388 |
| ENSMUSG00000062169 | Cnih4         | 0.064573666  | 0.467338552 | 0.722261062 |
| ENSMUSG00000113242 | Gm48016       | -0.038295768 | 0.46730767  | 0.722261062 |
| ENSMUSG00000023913 | Pla2g7        | 0.044053128  | 0.467522813 | 0.722366074 |
| ENSMUSG00000037266 | Rsrp1         | -0.065380028 | 0.467480614 | 0.722366074 |
| ENSMUSG00000023284 | Zfp605        | -0.065132765 | 0.46783207  | 0.72257123  |

|                    |               |              |             |             |
|--------------------|---------------|--------------|-------------|-------------|
| ENSMUSG00000029684 | Wasl          | -0.064130735 | 0.467888286 | 0.72257123  |
| ENSMUSG00000032306 | Mpi           | 0.064177057  | 0.467850276 | 0.72257123  |
| ENSMUSG00000112022 | Gm2436        | 0.043204265  | 0.467814454 | 0.72257123  |
| ENSMUSG00000021392 | Nol8          | 0.066073025  | 0.467984421 | 0.722629848 |
| ENSMUSG00000026171 | Rnf25         | -0.063757413 | 0.468155005 | 0.722713657 |
| ENSMUSG00000037921 | Ddx60         | -0.048148994 | 0.468155067 | 0.722713657 |
| ENSMUSG00000074403 | Hist2h3b      | -0.053065051 | 0.468430528 | 0.723049035 |
| ENSMUSG00000031217 | Efnb1         | -0.041792039 | 0.468599697 | 0.723220283 |
| ENSMUSG00000029276 | Glmn          | 0.065806932  | 0.468765616 | 0.723225834 |
| ENSMUSG00000042029 | Ncapg2        | 0.064982345  | 0.468777972 | 0.723225834 |
| ENSMUSG00000096160 | Gm3436        | -0.057181999 | 0.468728242 | 0.723225834 |
| ENSMUSG00000001127 | Araf          | -0.059208788 | 0.46887426  | 0.723242101 |
| ENSMUSG00000032786 | Alas1         | -0.058883683 | 0.468904971 | 0.723242101 |
| ENSMUSG00000032067 | Pts           | 0.06256649   | 0.46899166  | 0.723285995 |
| ENSMUSG00000022191 | Drosha        | -0.06542682  | 0.469175587 | 0.723479821 |
| ENSMUSG00000000957 | Mmp14         | -0.045667151 | 0.469622965 | 0.723540914 |
| ENSMUSG00000022514 | Il1rap        | -0.063088494 | 0.469520778 | 0.723540914 |
| ENSMUSG00000028331 | Trmo          | 0.061463973  | 0.469342664 | 0.723540914 |
| ENSMUSG00000037020 | Wdr62         | -0.060447463 | 0.469465309 | 0.723540914 |
| ENSMUSG00000039208 | Metrl         | 0.062642256  | 0.46947396  | 0.723540914 |
| ENSMUSG00000042870 | Tom1          | -0.064716045 | 0.469388961 | 0.723540914 |
| ENSMUSG00000045071 | E130308A19Rik | -0.063836657 | 0.469622896 | 0.723540914 |
| ENSMUSG00000019813 | Cep57l1       | -0.057311715 | 0.470168615 | 0.723842881 |
| ENSMUSG00000034738 | Nostrin       | 0.06563289   | 0.470155741 | 0.723842881 |
| ENSMUSG00000037957 | Wdr20         | -0.063543081 | 0.470112511 | 0.723842881 |
| ENSMUSG00000039345 | Mettl22       | 0.064864304  | 0.469985187 | 0.723842881 |
| ENSMUSG00000049382 | Krt8          | -0.045521278 | 0.47012     | 0.723842881 |
| ENSMUSG00000080941 | Gm16056       | 0.065517067  | 0.469928841 | 0.723842881 |
| ENSMUSG00000026037 | Orc2          | 0.065151591  | 0.470332934 | 0.724006118 |
| ENSMUSG00000043909 | Trp53bp1      | -0.057444697 | 0.470423949 | 0.72405649  |
| ENSMUSG00000078889 | Gm14288       | -0.014962979 | 0.470497674 | 0.724080238 |
| ENSMUSG00000096887 | Gm20594       | 0.046498692  | 0.470632834 | 0.724198517 |
| ENSMUSG00000025978 | Rftn2         | -0.031067821 | 0.470812069 | 0.724213156 |
| ENSMUSG00000034926 | Dhcr24        | -0.061694954 | 0.470742703 | 0.724213156 |
| ENSMUSG00000039903 | Eva1c         | -0.035624926 | 0.470817264 | 0.724213156 |
| ENSMUSG00000020056 | Washc3        | 0.058932593  | 0.4709417   | 0.72422519  |
| ENSMUSG00000059263 | Usp47         | 0.065235431  | 0.470909571 | 0.72422519  |
| ENSMUSG00000034639 | Setmar        | 0.057595396  | 0.471028099 | 0.724268385 |
| ENSMUSG00000029456 | Acad10        | 0.038862918  | 0.471110475 | 0.724305386 |
| ENSMUSG00000009092 | Derl3         | 0.042723148  | 0.471378254 | 0.724448068 |
| ENSMUSG00000018372 | Cep95         | 0.06283014   | 0.471264021 | 0.724448068 |
| ENSMUSG00000026698 | Pigc          | -0.061547243 | 0.471327431 | 0.724448068 |
| ENSMUSG00000000340 | Dbt           | 0.06198846   | 0.47156601  | 0.724455934 |

|                    |           |              |             |             |
|--------------------|-----------|--------------|-------------|-------------|
| ENSMUSG00000030846 | Tial1     | 0.064931061  | 0.471616672 | 0.724455934 |
| ENSMUSG00000048039 | Isg20l2   | 0.06478445   | 0.471514395 | 0.724455934 |
| ENSMUSG00000055782 | Abcd2     | -0.064646262 | 0.471477349 | 0.724455934 |
| ENSMUSG00000054414 | Slc30a7   | -0.061403619 | 0.471734052 | 0.724546637 |
| ENSMUSG00000034269 | Setd5     | 0.059648749  | 0.471861892 | 0.724653382 |
| ENSMUSG00000023919 | Cenpq     | 0.060725441  | 0.472077676 | 0.724895143 |
| ENSMUSG00000021978 | Extl3     | -0.045861277 | 0.472215306 | 0.72496233  |
| ENSMUSG00000048546 | Tob2      | -0.053258577 | 0.472240944 | 0.72496233  |
| ENSMUSG00000066442 | Mthfs     | 0.065183582  | 0.472296528 | 0.72496233  |
| ENSMUSG00000055639 | Dach1     | 0.047535932  | 0.472369696 | 0.724985049 |
| ENSMUSG00000039886 | Tmem120a  | 0.06233984   | 0.472570013 | 0.725202883 |
| ENSMUSG00000003812 | Dnase2a   | -0.064535933 | 0.473271889 | 0.725333403 |
| ENSMUSG00000016495 | Plgrkt    | 0.06181871   | 0.473482609 | 0.725333403 |
| ENSMUSG00000021396 | Nxn12     | -0.033221925 | 0.472888007 | 0.725333403 |
| ENSMUSG00000021681 | Aggf1     | 0.063751918  | 0.472882189 | 0.725333403 |
| ENSMUSG00000024597 | Slc12a2   | 0.043749443  | 0.473297695 | 0.725333403 |
| ENSMUSG00000028634 | Hivep3    | -0.049764273 | 0.473253908 | 0.725333403 |
| ENSMUSG00000029126 | Nsg1      | -0.027435179 | 0.473589397 | 0.725333403 |
| ENSMUSG00000029535 | Triap1    | 0.064946554  | 0.473457057 | 0.725333403 |
| ENSMUSG00000029822 | Osbpl3    | 0.062745702  | 0.473401079 | 0.725333403 |
| ENSMUSG00000029864 | Gstk1     | -0.063097405 | 0.4731125   | 0.725333403 |
| ENSMUSG00000033373 | Fntb      | -0.062723716 | 0.473515646 | 0.725333403 |
| ENSMUSG00000033685 | Ucp2      | -0.065168239 | 0.473213644 | 0.725333403 |
| ENSMUSG00000040247 | Tbc1d10c  | -0.06320358  | 0.473556765 | 0.725333403 |
| ENSMUSG00000050668 | Gpatch11  | -0.059634919 | 0.473076007 | 0.725333403 |
| ENSMUSG00000058793 | Cds2      | -0.064874852 | 0.472787021 | 0.725333403 |
| ENSMUSG00000102412 | Cd28      | -0.044683543 | 0.473304154 | 0.725333403 |
| ENSMUSG00000018363 | Smurf2    | 0.06209041   | 0.473761077 | 0.725506884 |
| ENSMUSG00000027478 | Dnmt3b    | 0.06507381   | 0.473847264 | 0.725549417 |
| ENSMUSG00000027940 | Tpm3      | 0.051875748  | 0.473919084 | 0.725569943 |
| ENSMUSG00000018752 | Tnfrsfm13 | -0.06092997  | 0.474237446 | 0.725724925 |
| ENSMUSG00000032127 | Vps11     | -0.062209546 | 0.474254023 | 0.725724925 |
| ENSMUSG00000037234 | Hook3     | -0.060942756 | 0.474093216 | 0.725724925 |
| ENSMUSG00000046991 | Wdr27     | 0.043794659  | 0.474243686 | 0.725724925 |
| ENSMUSG00000037260 | Hgsnat    | -0.063360457 | 0.474356342 | 0.725745679 |
| ENSMUSG00000080021 | Gm5915    | 0.034984579  | 0.474384443 | 0.725745679 |
| ENSMUSG00000027012 | Dync1i2   | -0.056629573 | 0.474690738 | 0.725946031 |
| ENSMUSG00000038502 | Ptov1     | -0.056888962 | 0.474630586 | 0.725946031 |
| ENSMUSG00000043602 | Zfp3      | -0.04755801  | 0.474690321 | 0.725946031 |
| ENSMUSG00000032834 | Pwp2      | 0.064281234  | 0.474868564 | 0.726128578 |
| ENSMUSG00000033430 | Terf2ip   | -0.062327797 | 0.475076181 | 0.726356627 |
| ENSMUSG00000048668 | Rhno1     | -0.0630717   | 0.475315911 | 0.726633715 |
| ENSMUSG00000035227 | Spcs2     | 0.063855303  | 0.475736824 | 0.72718768  |

|                    |           |              |             |             |
|--------------------|-----------|--------------|-------------|-------------|
| ENSMUSG00000022386 | Trmu      | -0.061877429 | 0.475950853 | 0.727425316 |
| ENSMUSG00000024048 | Myl12a    | 0.061235167  | 0.476068939 | 0.727516277 |
| ENSMUSG00000071267 | Zfp942    | -0.062936099 | 0.476756647 | 0.728477588 |
| ENSMUSG00000041623 | D11Wsu47e | -0.062578237 | 0.476818666 | 0.728482737 |
| ENSMUSG00000000531 | Grasp     | 0.040965858  | 0.477196693 | 0.728716433 |
| ENSMUSG00000021686 | Ap3b1     | 0.064994769  | 0.477151318 | 0.728716433 |
| ENSMUSG00000030107 | Usp18     | -0.03626949  | 0.477206301 | 0.728716433 |
| ENSMUSG00000073889 | Ii11ra1   | 0.063123474  | 0.477088455 | 0.728716433 |
| ENSMUSG00000035325 | Sec31a    | -0.062692879 | 0.477371528 | 0.728879133 |
| ENSMUSG00000035047 | Kri1      | -0.049954858 | 0.477441763 | 0.728896772 |
| ENSMUSG00000051306 | Usp42     | 0.053720375  | 0.477898446 | 0.729414672 |
| ENSMUSG00000062753 | Al413582  | -0.060451458 | 0.477872459 | 0.729414672 |
| ENSMUSG00000022760 | Thap7     | -0.061103706 | 0.478190835 | 0.729731814 |
| ENSMUSG00000028756 | Pink1     | -0.058560818 | 0.478223731 | 0.729731814 |
| ENSMUSG00000035863 | Palm      | -0.059248914 | 0.478327961 | 0.729761478 |
| ENSMUSG00000053835 | H2-T24    | -0.056983555 | 0.478360676 | 0.729761478 |
| ENSMUSG00000005804 | Bloc1s6   | -0.062657425 | 0.478493052 | 0.729873781 |
| ENSMUSG00000023140 | Reg2      | 0.037165086  | 0.478592805 | 0.7299363   |
| ENSMUSG00000031078 | Cttn      | 0.048551514  | 0.479012298 | 0.730350078 |
| ENSMUSG00000038949 | Cnst      | -0.063762892 | 0.479040503 | 0.730350078 |
| ENSMUSG00000101972 | Hist1h3i  | -0.036181033 | 0.478962558 | 0.730350078 |
| ENSMUSG00000054321 | Taf4b     | 0.056788803  | 0.479120347 | 0.730382159 |
| ENSMUSG00000026565 | Pou2f1    | -0.040760981 | 0.479706558 | 0.731186055 |
| ENSMUSG00000036473 | Tbc1d24   | -0.034025515 | 0.47980038  | 0.731239328 |
| ENSMUSG00000084274 | Gm12504   | 0.041073734  | 0.480029976 | 0.731499489 |
| ENSMUSG00000026357 | Rgs18     | -0.060619521 | 0.480137501 | 0.73157359  |
| ENSMUSG00000111939 | Gm48177   | -0.037886946 | 0.480413884 | 0.731904925 |
| ENSMUSG00000018796 | Acsl1     | -0.063462844 | 0.48095143  | 0.732174337 |
| ENSMUSG00000022812 | Gsk3b     | 0.062703445  | 0.481062295 | 0.732174337 |
| ENSMUSG00000024576 | Csnk1a1   | 0.058628954  | 0.48069035  | 0.732174337 |
| ENSMUSG00000024896 | Minpp1    | -0.05546619  | 0.481014606 | 0.732174337 |
| ENSMUSG00000027368 | Dusp2     | 0.054559242  | 0.48090345  | 0.732174337 |
| ENSMUSG00000033581 | Igf2bp2   | -0.057014297 | 0.480998178 | 0.732174337 |
| ENSMUSG00000033983 | Coil      | -0.063032943 | 0.480820843 | 0.732174337 |
| ENSMUSG00000041303 | Gtf3c3    | 0.054494037  | 0.480972855 | 0.732174337 |
| ENSMUSG00000026778 | Prkcq     | -0.034039249 | 0.481302052 | 0.732373924 |
| ENSMUSG00000072235 | Tuba1a    | 0.064218016  | 0.481311355 | 0.732373924 |
| ENSMUSG00000001930 | Vwf       | 0.022209645  | 0.481454605 | 0.73241245  |
| ENSMUSG00000037885 | Stk35     | -0.062634407 | 0.481423969 | 0.73241245  |
| ENSMUSG00000025793 | Hgs       | -0.056299528 | 0.481763399 | 0.732709634 |
| ENSMUSG00000028587 | Orc1      | -0.049869323 | 0.48176794  | 0.732709634 |
| ENSMUSG00000028744 | Pqlc2     | -0.060727876 | 0.481934831 | 0.732873719 |
| ENSMUSG00000022947 | Cbr3      | 0.034066097  | 0.482208473 | 0.733110161 |

|                    |               |              |             |             |
|--------------------|---------------|--------------|-------------|-------------|
| ENSMUSG00000031107 | Rbmx2         | 0.063726278  | 0.482253015 | 0.733110161 |
| ENSMUSG00000033066 | Gas7          | 0.054526504  | 0.48226738  | 0.733110161 |
| ENSMUSG00000024735 | Prpf19        | -0.060227002 | 0.482387569 | 0.733179443 |
| ENSMUSG00000032376 | Usp3          | 0.057568041  | 0.482431011 | 0.733179443 |
| ENSMUSG00000069307 | Hist1h2bq     | -0.0601955   | 0.482702508 | 0.733502307 |
| ENSMUSG00000078496 | Zfp982        | -0.044782003 | 0.48283359  | 0.733611746 |
| ENSMUSG00000064138 | Fam172a       | -0.059038374 | 0.482922867 | 0.733657648 |
| ENSMUSG00000008435 | Rdh13         | -0.062925877 | 0.48322541  | 0.73375829  |
| ENSMUSG00000033458 | Fan1          | -0.039002555 | 0.483192133 | 0.73375829  |
| ENSMUSG00000033972 | Zfp944        | -0.062901264 | 0.48318316  | 0.73375829  |
| ENSMUSG00000067878 | Map7d3        | -0.062419992 | 0.483135932 | 0.73375829  |
| ENSMUSG00000090150 | Acad11        | -0.069664263 | 0.483419691 | 0.733963572 |
| ENSMUSG00000037416 | Dmxl1         | 0.047497483  | 0.483630328 | 0.734193633 |
| ENSMUSG00000079192 | AC125149.1    | 0.056912595  | 0.483719453 | 0.734239193 |
| ENSMUSG00000028184 | Adgrl2        | 0.027338938  | 0.483800258 | 0.734272118 |
| ENSMUSG00000002963 | Pnkp          | -0.061753321 | 0.484626116 | 0.734334264 |
| ENSMUSG00000006998 | Psm2          | 0.061927135  | 0.484206808 | 0.734334264 |
| ENSMUSG00000009941 | Nxf2          | -0.04979883  | 0.48401758  | 0.734334264 |
| ENSMUSG00000019478 | Rab4a         | 0.041589806  | 0.484658557 | 0.734334264 |
| ENSMUSG00000022378 | Fam49b        | 0.052901923  | 0.484385045 | 0.734334264 |
| ENSMUSG00000027959 | Sass6         | -0.062564532 | 0.48419768  | 0.734334264 |
| ENSMUSG00000029790 | Cep41         | 0.06349036   | 0.483906302 | 0.734334264 |
| ENSMUSG00000030474 | Siglece       | 0.063051792  | 0.484394554 | 0.734334264 |
| ENSMUSG00000039914 | Coq10a        | -0.06176866  | 0.484506517 | 0.734334264 |
| ENSMUSG00000041740 | Rnf10         | -0.062434678 | 0.484443768 | 0.734334264 |
| ENSMUSG00000058706 | 0610030E20Rik | -0.060916631 | 0.484163036 | 0.734334264 |
| ENSMUSG00000060519 | Tor3a         | -0.058571415 | 0.484362612 | 0.734334264 |
| ENSMUSG00000074088 | Snrnp40       | 0.056616558  | 0.484668891 | 0.734334264 |
| ENSMUSG00000078197 | Gm17374       | 0.059639439  | 0.484451339 | 0.734334264 |
| ENSMUSG00000073423 | Zfp414        | -0.059000524 | 0.484742894 | 0.73435681  |
| ENSMUSG00000020170 | Frs2          | -0.047714549 | 0.485102095 | 0.734721755 |
| ENSMUSG00000023004 | Tuba1b        | 0.05605132   | 0.48505102  | 0.734721755 |
| ENSMUSG00000035623 | Rsf1          | -0.062786261 | 0.48524628  | 0.734850529 |
| ENSMUSG00000032565 | Nudt16        | -0.061938285 | 0.485369175 | 0.734947035 |
| ENSMUSG00000018339 | Gpx3          | -0.062817187 | 0.485569071 | 0.735160096 |
| ENSMUSG00000005718 | Tfap4         | -0.04188007  | 0.486338537 | 0.735382207 |
| ENSMUSG00000025982 | Sf3b1         | 0.061792905  | 0.486251632 | 0.735382207 |
| ENSMUSG00000026547 | Tagln2        | 0.059383744  | 0.486367026 | 0.735382207 |
| ENSMUSG00000027651 | Rprd1b        | 0.058909324  | 0.485992101 | 0.735382207 |
| ENSMUSG00000028622 | Mrpl37        | 0.062435043  | 0.486081566 | 0.735382207 |
| ENSMUSG00000028977 | Casz1         | -0.062824206 | 0.48586987  | 0.735382207 |
| ENSMUSG00000042079 | Hnrnpf        | -0.056480538 | 0.486069702 | 0.735382207 |
| ENSMUSG00000043635 | Adamts3       | -0.053697905 | 0.486294171 | 0.735382207 |

|                    |           |              |             |             |
|--------------------|-----------|--------------|-------------|-------------|
| ENSMUSG00000052013 | Btla      | 0.048336678  | 0.485781274 | 0.735382207 |
| ENSMUSG00000079056 | Kcnp3     | -0.063218577 | 0.486350544 | 0.735382207 |
| ENSMUSG00000082016 | Pgam1-ps2 | -0.062679489 | 0.485945557 | 0.735382207 |
| ENSMUSG00000034486 | Gbx2      | -0.055897905 | 0.486478669 | 0.735461484 |
| ENSMUSG00000021476 | Habp4     | -0.05530541  | 0.486540706 | 0.735465754 |
| ENSMUSG00000019518 | Ap4m1     | -0.062095043 | 0.486871968 | 0.735876943 |
| ENSMUSG00000079109 | Pms2      | -0.074146419 | 0.486945188 | 0.735898064 |
| ENSMUSG00000027671 | Actl6a    | 0.063797128  | 0.487072618 | 0.736001093 |
| ENSMUSG00000036214 | Znrd1as   | 0.059438967  | 0.48717952  | 0.736073084 |
| ENSMUSG00000004285 | Atp6v1f   | 0.056522306  | 0.487512851 | 0.736294257 |
| ENSMUSG00000028521 | Slc35d1   | -0.057404638 | 0.487740854 | 0.736294257 |
| ENSMUSG00000030703 | Gdpd3     | 0.059193599  | 0.487471053 | 0.736294257 |
| ENSMUSG00000033106 | Slc7a6os  | -0.063479005 | 0.48763531  | 0.736294257 |
| ENSMUSG00000033149 | Phldb2    | 0.029913926  | 0.487691466 | 0.736294257 |
| ENSMUSG00000037536 | Fbxo34    | 0.05998798   | 0.487633055 | 0.736294257 |
| ENSMUSG00000080839 | Gm11625   | 0.039405348  | 0.487609832 | 0.736294257 |
| ENSMUSG00000063556 | Gm10132   | 0.010758516  | 0.48803386  | 0.73664705  |
| ENSMUSG00000006010 | Odr4      | 0.056090161  | 0.488340576 | 0.736840862 |
| ENSMUSG00000021572 | Cep72     | -0.062314539 | 0.488672931 | 0.736840862 |
| ENSMUSG00000021814 | Anxa7     | 0.053162375  | 0.48865217  | 0.736840862 |
| ENSMUSG00000027519 | Rab22a    | 0.062747571  | 0.48868998  | 0.736840862 |
| ENSMUSG00000028962 | Slc4a2    | -0.043711524 | 0.48834642  | 0.736840862 |
| ENSMUSG00000034748 | Sirt6     | 0.061705811  | 0.488669135 | 0.736840862 |
| ENSMUSG00000034858 | Fam214a   | -0.047403431 | 0.48867891  | 0.736840862 |
| ENSMUSG00000035172 | Plekhh3   | -0.026277797 | 0.488648176 | 0.736840862 |
| ENSMUSG00000093942 | Olfra46   | 0.043895126  | 0.488696162 | 0.736840862 |
| ENSMUSG00000020883 | Fbxl20    | -0.060546397 | 0.489360843 | 0.736887403 |
| ENSMUSG00000021714 | Cenpk     | 0.060804312  | 0.48929196  | 0.736887403 |
| ENSMUSG00000021936 | Mapk8     | -0.051760741 | 0.489655365 | 0.736887403 |
| ENSMUSG00000022575 | Gsdmd     | -0.060693773 | 0.489727867 | 0.736887403 |
| ENSMUSG00000024847 | Aip       | -0.059592342 | 0.488959217 | 0.736887403 |
| ENSMUSG00000025724 | Sec11a    | 0.057637876  | 0.488955468 | 0.736887403 |
| ENSMUSG00000027822 | Slc33a1   | -0.058446565 | 0.489716065 | 0.736887403 |
| ENSMUSG00000028889 | Yrdc      | 0.060881729  | 0.489338004 | 0.736887403 |
| ENSMUSG00000034484 | Snx2      | 0.062623806  | 0.48973557  | 0.736887403 |
| ENSMUSG00000035762 | Tmem161b  | -0.043092753 | 0.489673682 | 0.736887403 |
| ENSMUSG00000037475 | Thoc2     | -0.062155805 | 0.489614357 | 0.736887403 |
| ENSMUSG00000038712 | Mindy1    | -0.060654114 | 0.488982527 | 0.736887403 |
| ENSMUSG00000042380 | Smim12    | 0.054462836  | 0.489139438 | 0.736887403 |
| ENSMUSG00000051978 | Erich1    | 0.061627635  | 0.48913166  | 0.736887403 |
| ENSMUSG00000082665 | Gm11470   | 0.042679943  | 0.489439694 | 0.736887403 |
| ENSMUSG00000090098 | Alms1-ps2 | 0.033173126  | 0.489381763 | 0.736887403 |
| ENSMUSG00000099634 | Gm29462   | 0.044279923  | 0.489225672 | 0.736887403 |

|                    |               |              |             |             |
|--------------------|---------------|--------------|-------------|-------------|
| ENSMUSG00000116048 | Sept2         | -0.061178003 | 0.489841817 | 0.736957995 |
| ENSMUSG00000012126 | Ubxn11        | -0.057444155 | 0.490271813 | 0.737247723 |
| ENSMUSG00000023045 | Soat2         | -0.042670379 | 0.490193762 | 0.737247723 |
| ENSMUSG00000024145 | Pigf          | 0.061836335  | 0.490123491 | 0.737247723 |
| ENSMUSG00000027710 | Acad9         | 0.057111349  | 0.490266915 | 0.737247723 |
| ENSMUSG00000029234 | Tmem165       | 0.051592696  | 0.490487212 | 0.737303843 |
| ENSMUSG00000030493 | Faap24        | 0.06118145   | 0.490467824 | 0.737303843 |
| ENSMUSG00000070709 | Zfp974        | -0.038019065 | 0.490417781 | 0.737303843 |
| ENSMUSG00000019857 | Asf1a         | 0.062153406  | 0.49066999  | 0.737331616 |
| ENSMUSG00000032403 | 2300009A05Rik | 0.06226257   | 0.490762551 | 0.737331616 |
| ENSMUSG00000042104 | Uggt2         | 0.022238945  | 0.490802496 | 0.737331616 |
| ENSMUSG00000074247 | Dda1          | -0.051288628 | 0.490608021 | 0.737331616 |
| ENSMUSG00000111064 | Gm30285       | -0.036751483 | 0.490780275 | 0.737331616 |
| ENSMUSG00000022016 | Akap11        | 0.059771001  | 0.491223034 | 0.737727614 |
| ENSMUSG00000026229 | Psm1          | 0.05556564   | 0.491135167 | 0.737727614 |
| ENSMUSG00000033460 | Armcx1        | -0.049816878 | 0.491244272 | 0.737727614 |
| ENSMUSG00000020003 | Pex7          | 0.062183075  | 0.491534667 | 0.737925195 |
| ENSMUSG00000047417 | Rexo1         | -0.057775323 | 0.491530825 | 0.737925195 |
| ENSMUSG00000056459 | Zbtb25        | -0.061858686 | 0.491554066 | 0.737925195 |
| ENSMUSG00000001018 | Snapin        | -0.059846196 | 0.491809298 | 0.738219129 |
| ENSMUSG00000029482 | Aacs          | -0.059612613 | 0.491995441 | 0.7384093   |
| ENSMUSG00000016252 | Atp5e         | -0.059735477 | 0.492263556 | 0.738722439 |
| ENSMUSG00000021519 | Mterf3        | -0.061308916 | 0.492527691 | 0.738852987 |
| ENSMUSG00000031562 | Dctd          | -0.06022318  | 0.492529002 | 0.738852987 |
| ENSMUSG00000034653 | Ythdc2        | -0.053122731 | 0.492503935 | 0.738852987 |
| ENSMUSG00000000982 | Ccl3          | 0.044839088  | 0.492798811 | 0.739168461 |
| ENSMUSG00000028760 | Eif4g3        | -0.060427993 | 0.492881095 | 0.739202617 |
| ENSMUSG00000028995 | Fam126a       | -0.050670242 | 0.493156196 | 0.739490215 |
| ENSMUSG00000041769 | Ppp2r2d       | 0.060172475  | 0.493191928 | 0.739490215 |
| ENSMUSG00000063145 | Bbs5          | 0.061631189  | 0.493596553 | 0.740007579 |
| ENSMUSG00000024691 | Fam111a       | 0.061512053  | 0.49378834  | 0.740071786 |
| ENSMUSG00000026039 | Sgo2a         | -0.057940365 | 0.493779838 | 0.740071786 |
| ENSMUSG00000112149 | Gm47611       | 0.025025763  | 0.493818128 | 0.740071786 |
| ENSMUSG00000007721 | Ccdc124       | 0.061865738  | 0.494215185 | 0.740488156 |
| ENSMUSG00000033502 | Cdc14a        | 0.061866038  | 0.494190001 | 0.740488156 |
| ENSMUSG00000089951 | Gm14435       | 0.017216261  | 0.49438772  | 0.740657324 |
| ENSMUSG00000032042 | Srpr          | 0.060636223  | 0.494477392 | 0.740702326 |
| ENSMUSG00000019210 | Atp6v1e1      | 0.056417895  | 0.494578086 | 0.740763826 |
| ENSMUSG00000027010 | Slc25a12      | 0.062590294  | 0.495042348 | 0.741191056 |
| ENSMUSG00000037415 | Ranbp10       | -0.056273024 | 0.495037541 | 0.741191056 |
| ENSMUSG00000066979 | Bub3          | -0.061047432 | 0.494945512 | 0.741191056 |
| ENSMUSG00000020946 | Gosr2         | 0.057630048  | 0.49521281  | 0.741267572 |
| ENSMUSG00000035198 | Tubg1         | -0.05369981  | 0.495174904 | 0.741267572 |

|                    |          |              |             |             |
|--------------------|----------|--------------|-------------|-------------|
| ENSMUSG00000063410 | Stk24    | -0.058345707 | 0.495379979 | 0.741428451 |
| ENSMUSG00000054499 | Dedd2    | -0.056514625 | 0.495444352 | 0.741435458 |
| ENSMUSG00000058886 | Deaf1    | -0.059535571 | 0.495536504 | 0.741484028 |
| ENSMUSG00000028080 | Lrba     | 0.041722645  | 0.49577851  | 0.741756791 |
| ENSMUSG00000034263 | Ints14   | -0.060240989 | 0.495900934 | 0.741761868 |
| ENSMUSG00000094622 | Gm3055   | -0.020401205 | 0.495901341 | 0.741761868 |
| ENSMUSG00000017767 | Spata25  | 0.018609316  | 0.49633484  | 0.742320897 |
| ENSMUSG00000026028 | Trak2    | -0.032560916 | 0.496411773 | 0.742346572 |
| ENSMUSG00000062627 | Mysm1    | 0.060721798  | 0.496494608 | 0.742356396 |
| ENSMUSG00000091945 | Vmn2r114 | 0.042062717  | 0.496537874 | 0.742356396 |
| ENSMUSG00000023965 | Fbxl17   | -0.054405619 | 0.496641939 | 0.742422618 |
| ENSMUSG00000026456 | Cyb5r1   | -0.058627162 | 0.496814468 | 0.742591156 |
| ENSMUSG00000022867 | Usp25    | 0.061274813  | 0.496883556 | 0.742605059 |
| ENSMUSG00000048271 | Rbm33    | 0.056210912  | 0.496956615 | 0.742624893 |
| ENSMUSG00000030062 | Rpn1     | 0.051004073  | 0.49722732  | 0.742850679 |
| ENSMUSG00000034349 | Smc4     | -0.055700526 | 0.497202112 | 0.742850679 |
| ENSMUSG00000031478 | Nek3     | -0.042174927 | 0.497366563 | 0.742969343 |
| ENSMUSG00000074746 | Pdzd8    | 0.061276105  | 0.497499635 | 0.74307876  |
| ENSMUSG00000004846 | Plod3    | -0.06058087  | 0.497763241 | 0.743383097 |
| ENSMUSG00000019970 | Sgk1     | 0.058985357  | 0.497899047 | 0.743496521 |
| ENSMUSG00000063894 | Zkscan8  | 0.042821096  | 0.498328406 | 0.744048219 |
| ENSMUSG00000113263 | Gm4811   | 0.016782842  | 0.49859374  | 0.744354909 |
| ENSMUSG00000020063 | Sirt1    | -0.06008664  | 0.498866235 | 0.744604097 |
| ENSMUSG00000022757 | Tfg      | -0.048657173 | 0.498880549 | 0.744604097 |
| ENSMUSG00000025979 | Mob4     | 0.059109946  | 0.499154208 | 0.744643219 |
| ENSMUSG00000028327 | Stra6l   | -0.030011274 | 0.499206512 | 0.744643219 |
| ENSMUSG00000030881 | Arfip2   | -0.060047866 | 0.499154203 | 0.744643219 |
| ENSMUSG00000034371 | Tkfc     | -0.045407885 | 0.499108114 | 0.744643219 |
| ENSMUSG00000111890 | Gm48836  | 0.02245498   | 0.499009977 | 0.744643219 |
| ENSMUSG00000038615 | Nfe2l1   | -0.059991491 | 0.499362731 | 0.744786802 |
| ENSMUSG00000020171 | Yeats4   | 0.060393257  | 0.499498464 | 0.744899799 |
| ENSMUSG00000032470 | Mras     | -0.058749026 | 0.499625612 | 0.744999967 |
| ENSMUSG00000040322 | Slc25a24 | -0.06070571  | 0.499756354 | 0.74510547  |
| ENSMUSG00000052833 | Sae1     | -0.06093778  | 0.500126804 | 0.745568296 |
| ENSMUSG00000012076 | Brms1l   | -0.060156825 | 0.500444669 | 0.745952626 |
| ENSMUSG00000067942 | Zfp160   | 0.049867476  | 0.500817419 | 0.746418666 |
| ENSMUSG00000020716 | Nf1      | 0.033778163  | 0.501131462 | 0.74670752  |
| ENSMUSG00000022299 | Slc25a32 | 0.059971302  | 0.501127933 | 0.74670752  |
| ENSMUSG00000035778 | Ggta1    | -0.057813484 | 0.501278275 | 0.746760221 |
| ENSMUSG00000036733 | Rbm42    | -0.053975691 | 0.501347193 | 0.746760221 |
| ENSMUSG00000078350 | Smim1    | -0.014930156 | 0.501296729 | 0.746760221 |
| ENSMUSG00000023828 | Slc22a3  | -0.031751878 | 0.501550841 | 0.746787205 |
| ENSMUSG00000026922 | Agpat2   | 0.060956783  | 0.501435255 | 0.746787205 |

|                    |             |              |             |             |
|--------------------|-------------|--------------|-------------|-------------|
| ENSMUSG00000033961 | Zfp446      | -0.054701499 | 0.50154562  | 0.746787205 |
| ENSMUSG00000096780 | Tmem181b-ps | -0.060032667 | 0.501605801 | 0.746787205 |
| ENSMUSG00000108686 | Gm45080     | 0.056049871  | 0.501721145 | 0.746869408 |
| ENSMUSG00000002546 | Golga2      | 0.055748795  | 0.501854889 | 0.746978978 |
| ENSMUSG00000001964 | Emd         | -0.058632662 | 0.502203024 | 0.747036768 |
| ENSMUSG00000013663 | Pten        | 0.061154057  | 0.502018578 | 0.747036768 |
| ENSMUSG00000020380 | Rad50       | -0.057521006 | 0.502322249 | 0.747036768 |
| ENSMUSG00000025262 | Fam120c     | -0.053734267 | 0.502203197 | 0.747036768 |
| ENSMUSG00000031157 | Pqbp1       | 0.054649897  | 0.502374859 | 0.747036768 |
| ENSMUSG00000031570 | Plpp5       | 0.061500938  | 0.502283809 | 0.747036768 |
| ENSMUSG00000054967 | Zfp647      | -0.038597001 | 0.502202292 | 0.747036768 |
| ENSMUSG00000078490 | Cfap74      | -0.03450588  | 0.502209839 | 0.747036768 |
| ENSMUSG00000034771 | Tle2        | -0.0282025   | 0.502572878 | 0.747104447 |
| ENSMUSG00000066000 | Zfp979      | 0.033742141  | 0.502600818 | 0.747104447 |
| ENSMUSG00000097075 | Cdiptos     | -0.047593552 | 0.502554014 | 0.747104447 |
| ENSMUSG00000034621 | Gpatch8     | -0.060568903 | 0.503124983 | 0.74744217  |
| ENSMUSG00000034868 | Myl12b      | -0.048557475 | 0.503128894 | 0.74744217  |
| ENSMUSG00000037370 | Enpp1       | 0.054769389  | 0.50300647  | 0.74744217  |
| ENSMUSG00000046388 | Gm9806      | 0.046668041  | 0.503024422 | 0.74744217  |
| ENSMUSG00000112239 | Gm17823     | 0.031772801  | 0.503080666 | 0.74744217  |
| ENSMUSG00000006307 | Kmt2b       | 0.046050759  | 0.503212576 | 0.747477088 |
| ENSMUSG00000020130 | Tbc1d15     | 0.054115623  | 0.503457839 | 0.7475732   |
| ENSMUSG00000025077 | Dclre1a     | -0.05857433  | 0.503450411 | 0.7475732   |
| ENSMUSG00000075074 | Olfir1254   | -0.054606476 | 0.503379983 | 0.7475732   |
| ENSMUSG00000041143 | Tmco4       | -0.056477866 | 0.503649898 | 0.747768992 |
| ENSMUSG00000032766 | Gng11       | 0.061641524  | 0.503883688 | 0.748026687 |
| ENSMUSG00000001627 | Ifrd1       | 0.056565543  | 0.504887967 | 0.748269721 |
| ENSMUSG00000002428 | Hltf        | -0.059107227 | 0.504518716 | 0.748269721 |
| ENSMUSG00000002679 | Med6        | 0.059229441  | 0.5046236   | 0.748269721 |
| ENSMUSG00000023994 | Nfya        | -0.057084277 | 0.504614233 | 0.748269721 |
| ENSMUSG00000024251 | Thada       | -0.049538413 | 0.50422921  | 0.748269721 |
| ENSMUSG00000025592 | Dach2       | -0.031730661 | 0.504386643 | 0.748269721 |
| ENSMUSG00000033554 | Dph5        | 0.059053964  | 0.504629537 | 0.748269721 |
| ENSMUSG00000035901 | Dennd5a     | 0.058738856  | 0.504399903 | 0.748269721 |
| ENSMUSG00000036097 | Slf2        | 0.059822246  | 0.504890792 | 0.748269721 |
| ENSMUSG00000036167 | Pphln1      | 0.058391264  | 0.504695108 | 0.748269721 |
| ENSMUSG00000037997 | Parp11      | -0.061394287 | 0.504745308 | 0.748269721 |
| ENSMUSG00000044501 | Zfp758      | -0.055573028 | 0.504829901 | 0.748269721 |
| ENSMUSG00000063605 | Ccdc102a    | -0.042125078 | 0.504198165 | 0.748269721 |
| ENSMUSG00000067149 | Jchain      | -0.015345672 | 0.504353226 | 0.748269721 |
| ENSMUSG00000039470 | Zdhhc2      | 0.051524457  | 0.504962677 | 0.748286974 |
| ENSMUSG00000021546 | Hnrnpk      | 0.054471898  | 0.50555927  | 0.748712289 |
| ENSMUSG00000022957 | Itns1       | -0.043871167 | 0.505611358 | 0.748712289 |

|                    |          |              |             |             |
|--------------------|----------|--------------|-------------|-------------|
| ENSMUSG00000023147 | Wrb      | -0.058605825 | 0.505610202 | 0.748712289 |
| ENSMUSG00000025484 | Bet1l    | -0.057437348 | 0.505354869 | 0.748712289 |
| ENSMUSG00000029600 | Rita1    | -0.056804908 | 0.505565184 | 0.748712289 |
| ENSMUSG00000081622 | Gm5937   | 0.041308988  | 0.5054569   | 0.748712289 |
| ENSMUSG00000036835 | Psenen   | 0.05768796   | 0.505744456 | 0.748820109 |
| ENSMUSG00000002781 | Tmem143  | 0.04172784   | 0.505856987 | 0.74887859  |
| ENSMUSG00000031537 | lkbkb    | -0.059457128 | 0.505904537 | 0.74887859  |
| ENSMUSG00000027130 | Slc12a6  | -0.048058461 | 0.506012507 | 0.748949161 |
| ENSMUSG00000020594 | Pum2     | 0.058134082  | 0.50615861  | 0.748986907 |
| ENSMUSG00000030380 | Mzf1     | 0.032642556  | 0.506099307 | 0.748986907 |
| ENSMUSG00000027459 | Fam110a  | -0.059004481 | 0.506265383 | 0.749027158 |
| ENSMUSG00000035278 | Plekhj1  | 0.053519824  | 0.506306418 | 0.749027158 |
| ENSMUSG00000003037 | Rab8a    | -0.058065376 | 0.506375403 | 0.74904     |
| ENSMUSG00000024953 | Prdx5    | 0.049924367  | 0.506499033 | 0.749044469 |
| ENSMUSG00000045435 | Tmem60   | 0.059769492  | 0.506452802 | 0.749044469 |
| ENSMUSG00000031262 | Cenpi    | 0.059608346  | 0.506664526 | 0.749110829 |
| ENSMUSG00000031684 | Slc10a7  | 0.043175017  | 0.506651525 | 0.749110829 |
| ENSMUSG00000062949 | Atp11c   | 0.059954619  | 0.506801497 | 0.749224161 |
| ENSMUSG00000060450 | Rnf14    | -0.059625037 | 0.506868279 | 0.749233713 |
| ENSMUSG00000012117 | Dhdds    | -0.059480196 | 0.506999099 | 0.749248758 |
| ENSMUSG00000073607 | Gm10548  | 0.017383101  | 0.506981381 | 0.749248758 |
| ENSMUSG00000018677 | Slc25a39 | 0.055062723  | 0.507137035 | 0.749363445 |
| ENSMUSG00000034254 | Agpat1   | -0.047481973 | 0.507198632 | 0.749365316 |
| ENSMUSG00000030423 | Pop4     | 0.053462505  | 0.507370775 | 0.749530495 |
| ENSMUSG00000035329 | Fbxo33   | 0.057899063  | 0.507491878 | 0.749620242 |
| ENSMUSG00000032046 | Abhd12   | -0.056256501 | 0.507967129 | 0.750233021 |
| ENSMUSG00000032898 | Fbxo21   | -0.053867914 | 0.508112905 | 0.750269899 |
| ENSMUSG00000072780 | Vmn2r24  | -0.038384825 | 0.508104602 | 0.750269899 |
| ENSMUSG00000000759 | Tubgcp3  | -0.059429836 | 0.508221757 | 0.750341429 |
| ENSMUSG00000041360 | Pum3     | 0.056494022  | 0.508298036 | 0.750364857 |
| ENSMUSG00000032417 | Rwdd2a   | -0.057843491 | 0.508371697 | 0.750384415 |
| ENSMUSG00000100595 | Gm19087  | 0.057429098  | 0.508739349 | 0.750837862 |
| ENSMUSG00000030275 | Etnk1    | 0.056677243  | 0.508986348 | 0.751022396 |
| ENSMUSG00000038095 | Sbno1    | 0.056603376  | 0.509011494 | 0.751022396 |
| ENSMUSG00000052798 | Nup107   | -0.059631672 | 0.509045773 | 0.751022396 |
| ENSMUSG00000020366 | Mapk9    | -0.058945973 | 0.510294607 | 0.751347714 |
| ENSMUSG00000022420 | Dnal4    | -0.056573411 | 0.509973558 | 0.751347714 |
| ENSMUSG00000022557 | Bop1     | 0.048283684  | 0.509464395 | 0.751347714 |
| ENSMUSG00000024269 | Tpgs2    | 0.054416965  | 0.510251652 | 0.751347714 |
| ENSMUSG00000024805 | Pcgf5    | 0.057444555  | 0.509917568 | 0.751347714 |
| ENSMUSG00000027615 | Hps3     | -0.05853635  | 0.510180565 | 0.751347714 |
| ENSMUSG00000030082 | Sec61a1  | -0.059681824 | 0.510056461 | 0.751347714 |
| ENSMUSG00000032192 | Gnb5     | -0.041681271 | 0.509564721 | 0.751347714 |

|                    |           |              |             |             |
|--------------------|-----------|--------------|-------------|-------------|
| ENSMUSG00000036057 | Ptpn23    | 0.034681219  | 0.509604005 | 0.751347714 |
| ENSMUSG00000037236 | Matr3     | 0.051155547  | 0.510099012 | 0.751347714 |
| ENSMUSG00000047766 | Lrrc49    | -0.04636051  | 0.510035042 | 0.751347714 |
| ENSMUSG00000049606 | Zfp644    | -0.05720342  | 0.509677112 | 0.751347714 |
| ENSMUSG00000054855 | Rnd1      | -0.056411511 | 0.510208382 | 0.751347714 |
| ENSMUSG00000066357 | Wdr6      | -0.056211244 | 0.509418822 | 0.751347714 |
| ENSMUSG00000074141 | Ii4i1     | 0.024499336  | 0.510051861 | 0.751347714 |
| ENSMUSG00000084830 | Gm14539   | 0.05534338   | 0.510229515 | 0.751347714 |
| ENSMUSG00000095115 | Itpripl2  | 0.04696442   | 0.510103543 | 0.751347714 |
| ENSMUSG00000101355 | Hist1h3h  | 0.019297585  | 0.510468032 | 0.751513978 |
| ENSMUSG00000004698 | Hdac9     | -0.051048491 | 0.510943005 | 0.751589657 |
| ENSMUSG00000024926 | Kat5      | -0.058359531 | 0.510633896 | 0.751589657 |
| ENSMUSG00000025993 | Slc40a1   | -0.058471355 | 0.510884561 | 0.751589657 |
| ENSMUSG00000041319 | Thoc6     | 0.057312732  | 0.510896389 | 0.751589657 |
| ENSMUSG00000042616 | Oscp1     | -0.054766017 | 0.510854765 | 0.751589657 |
| ENSMUSG00000101800 | Rnf170-ps | -0.03358084  | 0.510916472 | 0.751589657 |
| ENSMUSG00000101865 | Gm9775    | -0.033247194 | 0.510714053 | 0.751589657 |
| ENSMUSG00000018501 | Ncor1     | -0.056989871 | 0.511609571 | 0.752032863 |
| ENSMUSG00000021185 | Dglucy    | -0.056946037 | 0.511728666 | 0.752032863 |
| ENSMUSG00000025823 | Pdia4     | 0.059464408  | 0.511425942 | 0.752032863 |
| ENSMUSG00000030867 | Plk1      | -0.056086564 | 0.511725359 | 0.752032863 |
| ENSMUSG00000031516 | Dctn6     | 0.058010262  | 0.511711426 | 0.752032863 |
| ENSMUSG00000040482 | Dxo       | -0.054759289 | 0.511399452 | 0.752032863 |
| ENSMUSG00000042073 | Abhd14b   | -0.05832951  | 0.511654491 | 0.752032863 |
| ENSMUSG00000078779 | Zfp59     | -0.048645836 | 0.511610195 | 0.752032863 |
| ENSMUSG00000063760 | Rnf217    | -0.056325654 | 0.511802115 | 0.752051824 |
| ENSMUSG00000024043 | Arhgap28  | -0.026466683 | 0.512170916 | 0.752187267 |
| ENSMUSG00000032436 | Cmtm7     | -0.058512406 | 0.512180207 | 0.752187267 |
| ENSMUSG00000038368 | Focad     | 0.052422048  | 0.512197078 | 0.752187267 |
| ENSMUSG00000073139 | Tmem185a  | -0.054698152 | 0.512107073 | 0.752187267 |
| ENSMUSG00000116090 | Rpl19-ps6 | 0.029232543  | 0.51198378  | 0.752187267 |
| ENSMUSG00000008140 | Emc10     | -0.061868283 | 0.51235138  | 0.752209621 |
| ENSMUSG00000026544 | Dusp23    | -0.055942979 | 0.512328861 | 0.752209621 |
| ENSMUSG00000050954 | Zfp169    | 0.032432558  | 0.512393978 | 0.752209621 |
| ENSMUSG00000044250 | Pced1b    | -0.036777843 | 0.512716126 | 0.752593595 |
| ENSMUSG00000027014 | Cwc22     | 0.059220205  | 0.512861541 | 0.752718091 |
| ENSMUSG00000064127 | Med14     | 0.058484365  | 0.512935777 | 0.752738101 |
| ENSMUSG00000028790 | Khdrbs1   | 0.058998727  | 0.513143223 | 0.75295357  |
| ENSMUSG00000041685 | Fcho2     | -0.052743071 | 0.513578524 | 0.753503289 |
| ENSMUSG00000051235 | Gen1      | -0.055744486 | 0.513738447 | 0.753648902 |
| ENSMUSG00000024393 | Prrc2a    | -0.047953639 | 0.514050652 | 0.754017849 |
| ENSMUSG00000004591 | Pkn2      | 0.058444912  | 0.514150588 | 0.754075388 |
| ENSMUSG00000020794 | Ube2g1    | -0.058175099 | 0.514397778 | 0.754348855 |

|                    |               |              |             |             |
|--------------------|---------------|--------------|-------------|-------------|
| ENSMUSG00000064317 | Gm10146       | 0.058257778  | 0.514481786 | 0.754382984 |
| ENSMUSG0000006024  | Napa          | -0.057202076 | 0.514985901 | 0.754765766 |
| ENSMUSG00000027641 | Rbl1          | -0.052014194 | 0.514927598 | 0.754765766 |
| ENSMUSG00000036822 | Topors        | -0.050872941 | 0.514961735 | 0.754765766 |
| ENSMUSG00000068798 | Rap1a         | -0.046717011 | 0.514917657 | 0.754765766 |
| ENSMUSG00000025423 | Pias2         | 0.057271884  | 0.515145885 | 0.754911165 |
| ENSMUSG00000031387 | Renbp         | -0.058863599 | 0.515392881 | 0.755184025 |
| ENSMUSG00000021646 | Mccc2         | 0.058066662  | 0.515473572 | 0.755213167 |
| ENSMUSG00000027242 | Wdr76         | 0.058284053  | 0.515589078 | 0.7552314   |
| ENSMUSG00000035759 | Bbs10         | -0.032319714 | 0.515616675 | 0.7552314   |
| ENSMUSG00000073471 | Rsph3a        | -0.056198313 | 0.515668424 | 0.7552314   |
| ENSMUSG00000045211 | Nudt18        | -0.053442587 | 0.515744644 | 0.755253976 |
| ENSMUSG00000040820 | Hlcs          | 0.049440088  | 0.516109051 | 0.755698518 |
| ENSMUSG00000035473 | Galm          | -0.055687007 | 0.516343313 | 0.755952416 |
| ENSMUSG00000062929 | Cfl2          | -0.054147408 | 0.516513363 | 0.756112254 |
| ENSMUSG00000051124 | Gimap9        | 0.056598469  | 0.516589033 | 0.756133913 |
| ENSMUSG00000038886 | Man2a2        | 0.034909115  | 0.516790087 | 0.756178475 |
| ENSMUSG00000057234 | Mettl15       | -0.058111757 | 0.516751835 | 0.756178475 |
| ENSMUSG00000112101 | Gm47924       | 0.016803164  | 0.516802116 | 0.756178475 |
| ENSMUSG00000057914 | Cacnb2        | 0.034452266  | 0.517334971 | 0.756868984 |
| ENSMUSG00000114279 | Hist1h2bm     | 0.041681044  | 0.51743623  | 0.756927972 |
| ENSMUSG00000024218 | Taf11         | 0.055595681  | 0.517851993 | 0.757446963 |
| ENSMUSG00000025544 | Tm9sf2        | -0.055217034 | 0.518212977 | 0.757885716 |
| ENSMUSG00000030888 | Rrp8          | -0.056054359 | 0.518402069 | 0.758073004 |
| ENSMUSG00000029128 | Rab28         | 0.058930916  | 0.518474333 | 0.758077944 |
| ENSMUSG00000063455 | D630045J12Rik | -0.03852925  | 0.518527511 | 0.758077944 |
| ENSMUSG00000030878 | Cdr2          | -0.041785932 | 0.518669314 | 0.758094697 |
| ENSMUSG00000099647 | Gm5776        | 0.057516129  | 0.518604214 | 0.758094697 |
| ENSMUSG00000107928 | Gm45140       | 0.055101022  | 0.51872207  | 0.758094697 |
| ENSMUSG00000066362 | Rps13-ps1     | -0.056609532 | 0.518942404 | 0.758327482 |
| ENSMUSG00000031295 | Phka2         | -0.045701302 | 0.519069562 | 0.758424072 |
| ENSMUSG00000017119 | Nbr1          | -0.047349604 | 0.519280324 | 0.758585834 |
| ENSMUSG00000037463 | Fbxo27        | 0.041520961  | 0.519345966 | 0.758585834 |
| ENSMUSG00000041132 | N4bp2l1       | -0.056689214 | 0.519363492 | 0.758585834 |
| ENSMUSG00000006389 | Mpl           | 0.02491555   | 0.519685295 | 0.758966614 |
| ENSMUSG00000035674 | Ndufa3        | 0.054582389  | 0.519827253 | 0.758995452 |
| ENSMUSG00000041153 | Osgin2        | -0.055900679 | 0.519818052 | 0.758995452 |
| ENSMUSG00000044345 | Marveld1      | -0.057100922 | 0.520000412 | 0.75915904  |
| ENSMUSG00000005610 | Eif4g2        | 0.057068182  | 0.520612351 | 0.759168756 |
| ENSMUSG00000016619 | Nup50         | 0.056107616  | 0.520295892 | 0.759168756 |
| ENSMUSG00000019214 | Chtf18        | -0.056841389 | 0.520187734 | 0.759168756 |
| ENSMUSG00000025159 | Mms19         | -0.041859885 | 0.520369608 | 0.759168756 |
| ENSMUSG00000026981 | Il1rn         | 0.03017289   | 0.520675274 | 0.759168756 |

|                    |           |              |             |             |
|--------------------|-----------|--------------|-------------|-------------|
| ENSMUSG00000027901 | Dennd2d   | -0.053202955 | 0.520354931 | 0.759168756 |
| ENSMUSG00000040618 | Pck2      | -0.057742312 | 0.520679384 | 0.759168756 |
| ENSMUSG00000044224 | Dnajc21   | 0.05513548   | 0.520527351 | 0.759168756 |
| ENSMUSG00000045251 | Zfp688    | -0.05760217  | 0.520553672 | 0.759168756 |
| ENSMUSG00000047409 | Ctdspl    | 0.057855035  | 0.520514026 | 0.759168756 |
| ENSMUSG00000079470 | Utp14b    | 0.040250839  | 0.520567091 | 0.759168756 |
| ENSMUSG00000024072 | Yipf4     | 0.057868335  | 0.520883976 | 0.759199703 |
| ENSMUSG00000027164 | Traf6     | -0.05575305  | 0.520768757 | 0.759199703 |
| ENSMUSG00000030156 | Cd69      | 0.057423731  | 0.520872793 | 0.759199703 |
| ENSMUSG00000018733 | Pex12     | -0.049858658 | 0.521099793 | 0.759294623 |
| ENSMUSG00000039285 | Azi2      | 0.055483748  | 0.521111188 | 0.759294623 |
| ENSMUSG00000068874 | Selenbp1  | -0.057443598 | 0.52119362  | 0.759294623 |
| ENSMUSG00000090762 | Vmn2r56   | 0.03028641   | 0.521138297 | 0.759294623 |
| ENSMUSG00000068299 | Nat8f4    | -0.029862091 | 0.521516782 | 0.759676316 |
| ENSMUSG00000045441 | Gprin3    | -0.028513543 | 0.521775842 | 0.759964556 |
| ENSMUSG00000026384 | Ptpn4     | -0.02847152  | 0.522034868 | 0.760252679 |
| ENSMUSG00000004100 | Ppan      | -0.049847644 | 0.522245912 | 0.760381722 |
| ENSMUSG00000034789 | Rab24     | -0.051137178 | 0.522212449 | 0.760381722 |
| ENSMUSG00000024429 | Gnl1      | 0.057250614  | 0.522314014 | 0.760391745 |
| ENSMUSG00000073096 | Lrrc61    | -0.040772732 | 0.522488372 | 0.760556436 |
| ENSMUSG00000028093 | Acp6      | -0.050638586 | 0.522819483 | 0.760860081 |
| ENSMUSG00000051790 | Nlgn2     | 0.037478416  | 0.522759528 | 0.760860081 |
| ENSMUSG00000032498 | Mlh1      | -0.057231312 | 0.522893992 | 0.760879367 |
| ENSMUSG00000047434 | Xxylt1    | -0.049325215 | 0.523234302 | 0.761247893 |
| ENSMUSG00000062078 | Qk        | -0.055189278 | 0.523269826 | 0.761247893 |
| ENSMUSG00000038225 | Primpol   | -0.034536663 | 0.523396714 | 0.761282123 |
| ENSMUSG00000109510 | Gm42417   | 0.033167938  | 0.523415935 | 0.761282123 |
| ENSMUSG00000002992 | Apoc2     | -0.050825836 | 0.523548669 | 0.761386023 |
| ENSMUSG00000032314 | Etfa      | 0.056031887  | 0.523816466 | 0.761449919 |
| ENSMUSG00000036676 | Tmtc3     | -0.035249601 | 0.523899123 | 0.761449919 |
| ENSMUSG00000040850 | Psme4     | 0.040077357  | 0.52385738  | 0.761449919 |
| ENSMUSG00000061981 | Flot2     | -0.056642569 | 0.523805489 | 0.761449919 |
| ENSMUSG00000075033 | Nxpe3     | -0.048996236 | 0.523818202 | 0.761449919 |
| ENSMUSG00000069302 | Hist1h2ah | 0.04212782   | 0.524006777 | 0.761517278 |
| ENSMUSG00000027230 | Creb3l1   | -0.052254567 | 0.524300223 | 0.761774388 |
| ENSMUSG00000029029 | Wrap73    | -0.055543738 | 0.524306356 | 0.761774388 |
| ENSMUSG00000021188 | Trip11    | 0.057104455  | 0.524576476 | 0.762077708 |
| ENSMUSG00000061130 | Ppm1b     | -0.05558746  | 0.524666736 | 0.762119697 |
| ENSMUSG00000020893 | Per1      | 0.028385079  | 0.524934886 | 0.762152685 |
| ENSMUSG00000034647 | Ankrd12   | -0.055842882 | 0.524787398 | 0.762152685 |
| ENSMUSG00000035268 | Pkig      | -0.047336242 | 0.524862435 | 0.762152685 |
| ENSMUSG00000047371 | Zfp768    | -0.055537953 | 0.52487483  | 0.762152685 |
| ENSMUSG00000040043 | Rbms2     | -0.048856679 | 0.525098749 | 0.762301492 |

|                    |            |              |             |             |
|--------------------|------------|--------------|-------------|-------------|
| ENSMUSG00000021540 | Smad5      | 0.049839375  | 0.525230995 | 0.76240437  |
| ENSMUSG00000004661 | Arid3b     | -0.022132759 | 0.525805312 | 0.763148841 |
| ENSMUSG00000030494 | Rhpn2      | 0.041265879  | 0.525987884 | 0.76332463  |
| ENSMUSG00000036955 | Kif1bp     | -0.056722649 | 0.52616682  | 0.763495102 |
| ENSMUSG00000094379 | Vmn1r202   | -0.043100703 | 0.526482091 | 0.76386334  |
| ENSMUSG00000089631 | Gm16326    | 0.024473763  | 0.526744969 | 0.764155485 |
| ENSMUSG00000054199 | Gon4l      | 0.055694703  | 0.526829317 | 0.764188596 |
| ENSMUSG00000030123 | Plxnd1     | 0.046490829  | 0.526924021 | 0.764236719 |
| ENSMUSG00000009569 | Mrtfb      | -0.051166817 | 0.52713734  | 0.764293603 |
| ENSMUSG00000026197 | Zfand2b    | -0.053704534 | 0.527042938 | 0.764293603 |
| ENSMUSG00000047888 | Tnrc6b     | 0.055385444  | 0.527147838 | 0.764293603 |
| ENSMUSG00000084235 | Gm15421    | 0.036293769  | 0.527210874 | 0.764295782 |
| ENSMUSG00000001962 | Fam50a     | 0.053797637  | 0.52786203  | 0.76446047  |
| ENSMUSG00000008845 | Cd163      | -0.045084593 | 0.527494199 | 0.76446047  |
| ENSMUSG00000022637 | Cblb       | -0.030102062 | 0.527918128 | 0.76446047  |
| ENSMUSG00000034501 | Pcnx4      | 0.056925232  | 0.527640158 | 0.76446047  |
| ENSMUSG00000037754 | Ppp1r16b   | -0.053660879 | 0.52786821  | 0.76446047  |
| ENSMUSG00000037993 | Dhx38      | 0.055222628  | 0.527634942 | 0.76446047  |
| ENSMUSG00000043252 | Tmem64     | -0.052423236 | 0.527888143 | 0.76446047  |
| ENSMUSG00000050567 | Maml1      | 0.041964547  | 0.527896501 | 0.76446047  |
| ENSMUSG00000055044 | Pdlim1     | -0.054732353 | 0.528004974 | 0.76446047  |
| ENSMUSG00000064215 | Ifi27      | 0.046489397  | 0.52791554  | 0.76446047  |
| ENSMUSG00000064356 | mt-Atp8    | -0.050258741 | 0.528063025 | 0.76446047  |
| ENSMUSG00000070604 | Vsig10l    | -0.055741466 | 0.528055714 | 0.76446047  |
| ENSMUSG00000050737 | Ptges      | -0.038776525 | 0.528152345 | 0.764500674 |
| ENSMUSG00000030528 | Blm        | 0.041955062  | 0.528232114 | 0.764527043 |
| ENSMUSG00000033287 | Kctd17     | -0.042097756 | 0.52837892  | 0.764650421 |
| ENSMUSG00000009828 | Ick        | 0.051456801  | 0.528508675 | 0.764660018 |
| ENSMUSG00000036968 | Cnpy4      | 0.05141992   | 0.528502855 | 0.764660018 |
| ENSMUSG00000115893 | AC242685.1 | 0.017488505  | 0.528620954 | 0.764733388 |
| ENSMUSG00000029020 | Mfn2       | -0.050110089 | 0.528733614 | 0.764807292 |
| ENSMUSG00000026491 | Ahctf1     | -0.056036445 | 0.52894314  | 0.764932208 |
| ENSMUSG00000044339 | Alkbh2     | 0.056597889  | 0.528889753 | 0.764932208 |
| ENSMUSG00000037339 | Fam53a     | -0.056443818 | 0.529081782 | 0.765043634 |
| ENSMUSG00000029647 | Pan3       | -0.046730762 | 0.529169727 | 0.765081735 |
| ENSMUSG00000038141 | Tmem181a   | 0.054041941  | 0.529298481 | 0.765089775 |
| ENSMUSG00000112023 | Lilr4b     | -0.035086506 | 0.529288269 | 0.765089775 |
| ENSMUSG00000024053 | Emilin2    | -0.05590461  | 0.529855586 | 0.765360651 |
| ENSMUSG00000032733 | Snx33      | -0.033174421 | 0.529684168 | 0.765360651 |
| ENSMUSG00000033991 | Ttc37      | -0.05514587  | 0.529767052 | 0.765360651 |
| ENSMUSG00000034538 | Zfp418     | -0.036898749 | 0.529601314 | 0.765360651 |
| ENSMUSG00000045690 | Wdr89      | 0.056440932  | 0.529651994 | 0.765360651 |
| ENSMUSG00000097715 | Gpr137b-ps | 0.032699416  | 0.529837221 | 0.765360651 |

|                    |               |              |             |             |
|--------------------|---------------|--------------|-------------|-------------|
| ENSMUSG00000028582 | Cc2d1b        | -0.05612397  | 0.53008848  | 0.76551901  |
| ENSMUSG00000031792 | Usb1          | -0.056106443 | 0.530088356 | 0.76551901  |
| ENSMUSG00000057157 | Gm6054        | -0.040706063 | 0.530221883 | 0.765622647 |
| ENSMUSG00000015880 | Ncapg         | 0.056333806  | 0.530708765 | 0.765702587 |
| ENSMUSG00000022051 | Bnip3l        | -0.053323826 | 0.530629356 | 0.765702587 |
| ENSMUSG00000023809 | Rps6ka2       | 0.045536688  | 0.530385459 | 0.765702587 |
| ENSMUSG00000028710 | Atpaf1        | -0.054970695 | 0.530665188 | 0.765702587 |
| ENSMUSG00000029291 | Rufy3         | -0.056140759 | 0.530421733 | 0.765702587 |
| ENSMUSG00000039512 | Uhrf1bp1      | 0.041928633  | 0.53047575  | 0.765702587 |
| ENSMUSG00000062198 | 2700097O09Rik | 0.055348246  | 0.53065458  | 0.765702587 |
| ENSMUSG00000026196 | Bard1         | 0.043157921  | 0.530957267 | 0.76597215  |
| ENSMUSG00000021175 | Cdca7l        | -0.055936193 | 0.531087367 | 0.766070862 |
| ENSMUSG00000047554 | Tmem41b       | 0.054452612  | 0.531293974 | 0.766279894 |
| ENSMUSG00000051278 | Zgrf1         | -0.052331169 | 0.531414356 | 0.766364533 |
| ENSMUSG00000019873 | Reep3         | -0.054361276 | 0.531629352 | 0.76641934  |
| ENSMUSG00000022358 | Fbxo32        | -0.033601531 | 0.531585168 | 0.76641934  |
| ENSMUSG00000027496 | Aurka         | 0.05305305   | 0.531637472 | 0.76641934  |
| ENSMUSG00000003992 | Ssbp2         | 0.052016683  | 0.531901313 | 0.766659453 |
| ENSMUSG00000038047 | Haus6         | -0.056159923 | 0.531930208 | 0.766659453 |
| ENSMUSG00000082820 | Gm13803       | 0.048872056  | 0.531989198 | 0.766659453 |
| ENSMUSG00000020834 | Dhrs13        | 0.055218972  | 0.532136941 | 0.766694461 |
| ENSMUSG00000051329 | Nup160        | -0.050705324 | 0.53213491  | 0.766694461 |
| ENSMUSG00000001052 | Sec24b        | 0.046552116  | 0.532224069 | 0.766731055 |
| ENSMUSG00000037487 | Ubr5          | 0.05799698   | 0.532594713 | 0.766998137 |
| ENSMUSG00000092233 | Gm20403       | -0.036391103 | 0.532537064 | 0.766998137 |
| ENSMUSG00000114228 | Gm47605       | -0.032718036 | 0.532474202 | 0.766998137 |
| ENSMUSG00000020137 | Thap2         | -0.05212996  | 0.532837389 | 0.767258661 |
| ENSMUSG00000001569 | Nom1          | 0.054882421  | 0.533250902 | 0.767431324 |
| ENSMUSG00000002204 | Napsa         | 0.045650558  | 0.533760503 | 0.767431324 |
| ENSMUSG00000014195 | Dnajc7        | -0.053318345 | 0.533158595 | 0.767431324 |
| ENSMUSG00000020700 | Map3k3        | -0.054439635 | 0.533566101 | 0.767431324 |
| ENSMUSG00000021180 | Rps6ka5       | 0.05604642   | 0.533550144 | 0.767431324 |
| ENSMUSG00000022545 | Erc4          | -0.055914497 | 0.533700196 | 0.767431324 |
| ENSMUSG00000028873 | Cdca8         | -0.053761035 | 0.533202417 | 0.767431324 |
| ENSMUSG00000029592 | Usp30         | -0.042838053 | 0.533494819 | 0.767431324 |
| ENSMUSG00000039497 | Dse           | 0.020232077  | 0.533676174 | 0.767431324 |
| ENSMUSG00000042508 | Dmtf1         | -0.041759519 | 0.533421805 | 0.767431324 |
| ENSMUSG00000042705 | Commd10       | -0.055948463 | 0.533318128 | 0.767431324 |
| ENSMUSG00000052593 | Adam17        | -0.055851638 | 0.533715372 | 0.767431324 |
| ENSMUSG00000073291 | Gm10491       | -0.042177229 | 0.533244277 | 0.767431324 |
| ENSMUSG00000024580 | Grpel2        | 0.051121017  | 0.533907433 | 0.76755373  |
| ENSMUSG00000025199 | Chuk          | -0.055566561 | 0.533986562 | 0.767578647 |
| ENSMUSG00000003559 | As3mt         | 0.050558347  | 0.534381029 | 0.767892573 |

|                    |            |              |             |             |
|--------------------|------------|--------------|-------------|-------------|
| ENSMUSG00000003923 | Tfam       | 0.05155808   | 0.534270041 | 0.767892573 |
| ENSMUSG00000020978 | Klhdc2     | 0.049852228  | 0.53471298  | 0.767892573 |
| ENSMUSG00000024143 | Rhoq       | -0.04123057  | 0.534617298 | 0.767892573 |
| ENSMUSG00000026356 | Dars       | 0.05050321   | 0.5345565   | 0.767892573 |
| ENSMUSG00000026743 | Mllt10     | 0.054862559  | 0.534946819 | 0.767892573 |
| ENSMUSG00000055897 | Ppp4r1l-ps | -0.048742618 | 0.534855947 | 0.767892573 |
| ENSMUSG00000075028 | Prdm11     | -0.044178957 | 0.534899535 | 0.767892573 |
| ENSMUSG00000078817 | Nlrp12     | -0.046698911 | 0.534559489 | 0.767892573 |
| ENSMUSG00000081650 | Gm16181    | -0.028846645 | 0.534935743 | 0.767892573 |
| ENSMUSG00000082456 | Gm11598    | 0.036302917  | 0.534695519 | 0.767892573 |
| ENSMUSG00000114759 | Gm10257    | 0.02530987   | 0.53471633  | 0.767892573 |
| ENSMUSG00000021822 | Plau       | 0.044801409  | 0.535387612 | 0.768077717 |
| ENSMUSG00000023011 | Faim2      | -0.039487468 | 0.535294791 | 0.768077717 |
| ENSMUSG00000033762 | Recql4     | -0.050721133 | 0.535213501 | 0.768077717 |
| ENSMUSG00000038628 | Polr3k     | 0.055648709  | 0.535176173 | 0.768077717 |
| ENSMUSG00000059689 | Zfp637     | -0.052362092 | 0.53536992  | 0.768077717 |
| ENSMUSG00000113416 | Gm49328    | -0.028249679 | 0.53544682  | 0.768077717 |
| ENSMUSG00000009585 | Apobec3    | -0.046591801 | 0.535617538 | 0.768143328 |
| ENSMUSG00000038914 | Dido1      | 0.055256081  | 0.535678086 | 0.768143328 |
| ENSMUSG00000102418 | Sh2d1b1    | 0.052333445  | 0.535636806 | 0.768143328 |
| ENSMUSG00000038365 | Fbxo25     | -0.0545918   | 0.535956925 | 0.768398328 |
| ENSMUSG00000110528 | Gm1943     | 0.050409107  | 0.53597964  | 0.768398328 |
| ENSMUSG00000020340 | Cyfp2      | 0.055238223  | 0.536508468 | 0.768406684 |
| ENSMUSG00000021134 | Srsf5      | 0.055960513  | 0.536492773 | 0.768406684 |
| ENSMUSG00000022559 | Fbxl6      | 0.055241971  | 0.536457977 | 0.768406684 |
| ENSMUSG00000029415 | Sdad1      | 0.052029441  | 0.536373365 | 0.768406684 |
| ENSMUSG00000035673 | Sbno2      | -0.055151487 | 0.536756923 | 0.768406684 |
| ENSMUSG00000038545 | Cul7       | 0.038128039  | 0.536281152 | 0.768406684 |
| ENSMUSG00000046603 | Tcaim      | -0.039127309 | 0.536789694 | 0.768406684 |
| ENSMUSG00000051989 | Smim11     | 0.049000708  | 0.536676012 | 0.768406684 |
| ENSMUSG00000054509 | Parp4      | 0.037189122  | 0.536249314 | 0.768406684 |
| ENSMUSG00000079608 | Stard6     | 0.031968415  | 0.536714123 | 0.768406684 |
| ENSMUSG00000090112 | Shprh      | -0.052484396 | 0.536343717 | 0.768406684 |
| ENSMUSG00000114046 | Gm49321    | -0.052382153 | 0.536504893 | 0.768406684 |
| ENSMUSG00000116415 | AC174929.1 | -0.032994869 | 0.536613711 | 0.768406684 |
| ENSMUSG00000037860 | Aim2       | 0.055446723  | 0.536905989 | 0.768484591 |
| ENSMUSG00000019845 | Tube1      | -0.052078051 | 0.537024222 | 0.768565257 |
| ENSMUSG00000024601 | Isoc1      | 0.054954132  | 0.537165163 | 0.768678398 |
| ENSMUSG00000022200 | Golph3     | 0.054304178  | 0.537509863 | 0.768856708 |
| ENSMUSG00000035158 | Mitf       | 0.030980579  | 0.537656845 | 0.768856708 |
| ENSMUSG00000071723 | Gspt2      | 0.053669594  | 0.537650425 | 0.768856708 |
| ENSMUSG00000086414 | Gm15645    | -0.030187906 | 0.537661168 | 0.768856708 |
| ENSMUSG00000096592 | Gm15801    | -0.052142711 | 0.537450326 | 0.768856708 |

|                    |            |              |             |             |
|--------------------|------------|--------------|-------------|-------------|
| ENSMUSG00000111696 | Gm47932    | 0.030643012  | 0.537403744 | 0.768856708 |
| ENSMUSG00000022635 | Zcrb1      | 0.053834829  | 0.538296258 | 0.768879695 |
| ENSMUSG00000026490 | Cdc42bpa   | -0.029167912 | 0.53779607  | 0.768879695 |
| ENSMUSG00000028514 | Usp24      | -0.05501299  | 0.538253008 | 0.768879695 |
| ENSMUSG00000038227 | Hoxa9      | 0.055072718  | 0.53792645  | 0.768879695 |
| ENSMUSG00000047446 | Arl4a      | -0.054746989 | 0.538140893 | 0.768879695 |
| ENSMUSG00000048410 | Zfp407     | 0.046788138  | 0.538290106 | 0.768879695 |
| ENSMUSG00000064105 | Cnm2       | -0.053504063 | 0.538111852 | 0.768879695 |
| ENSMUSG00000074733 | Zfp950     | -0.054550548 | 0.538024377 | 0.768879695 |
| ENSMUSG00000083052 | Gm12285    | -0.027756078 | 0.538030442 | 0.768879695 |
| ENSMUSG00000111777 | Gm47147    | 0.032198229  | 0.537884869 | 0.768879695 |
| ENSMUSG00000029725 | Ppp1r35    | -0.053356716 | 0.538512569 | 0.76910022  |
| ENSMUSG00000031505 | Naxd       | 0.049833417  | 0.538831905 | 0.769202517 |
| ENSMUSG00000063334 | Krr1       | -0.051093462 | 0.5386619   | 0.769202517 |
| ENSMUSG00000070371 | Prss36     | -0.033427831 | 0.538793601 | 0.769202517 |
| ENSMUSG00000075268 | Gm10819    | -0.025268242 | 0.538773812 | 0.769202517 |
| ENSMUSG00000041219 | Arhgap11a  | -0.052171667 | 0.53906841  | 0.769451703 |
| ENSMUSG00000031864 | Ints10     | -0.049493743 | 0.539596919 | 0.76987699  |
| ENSMUSG00000034560 | Washc4     | -0.049214567 | 0.539614288 | 0.76987699  |
| ENSMUSG00000034837 | Gnat1      | -0.049196077 | 0.539498395 | 0.76987699  |
| ENSMUSG00000037149 | Ddx1       | 0.055018683  | 0.539538056 | 0.76987699  |
| ENSMUSG00000065979 | Cpped1     | 0.055164354  | 0.539715517 | 0.769932977 |
| ENSMUSG00000052525 | Spdya      | 0.054932803  | 0.539997673 | 0.769981759 |
| ENSMUSG00000056412 | Gm12396    | 0.056750104  | 0.539932125 | 0.769981759 |
| ENSMUSG00000057503 | Olfr1459   | 0.046238619  | 0.539831761 | 0.769981759 |
| ENSMUSG00000111328 | AC139209.1 | -0.017889786 | 0.539959683 | 0.769981759 |
| ENSMUSG00000010047 | Hyal2      | -0.042342176 | 0.540527226 | 0.770478339 |
| ENSMUSG00000039178 | Tbc1d19    | 0.054884463  | 0.540455013 | 0.770478339 |
| ENSMUSG00000108911 | Gm45113    | 0.052209027  | 0.540532022 | 0.770478339 |
| ENSMUSG00000025171 | Ubt1       | 0.054229662  | 0.540842736 | 0.770832773 |
| ENSMUSG00000018583 | G3bp1      | 0.045049032  | 0.540949797 | 0.770896906 |
| ENSMUSG00000020738 | Sumo2      | 0.046631779  | 0.54109198  | 0.771011068 |
| ENSMUSG00000022948 | Setd4      | 0.054806825  | 0.541291601 | 0.77120704  |
| ENSMUSG00000035504 | Reep6      | 0.02831649   | 0.541472891 | 0.771376852 |
| ENSMUSG00000028057 | Rit1       | -0.054888237 | 0.541741238 | 0.771582149 |
| ENSMUSG00000055116 | Arntl      | -0.054425786 | 0.541720621 | 0.771582149 |
| ENSMUSG00000060467 | Gm10080    | -0.03086783  | 0.5419206   | 0.771660641 |
| ENSMUSG00000102037 | Bcl2a1a    | 0.031510459  | 0.541886126 | 0.771660641 |
| ENSMUSG00000071037 | Camkmt     | -0.053050668 | 0.542047561 | 0.771752953 |
| ENSMUSG00000012535 | Tnpo3      | -0.051074658 | 0.54213629  | 0.771790814 |
| ENSMUSG00000067058 | Rps15a-ps5 | 0.045940527  | 0.542319137 | 0.771962641 |
| ENSMUSG00000030333 | Ap1m1      | -0.053262052 | 0.542711736 | 0.772218408 |
| ENSMUSG00000022442 | Ttll1      | -0.053250108 | 0.5427475   | 0.772218408 |

|                    |               |              |             |             |
|--------------------|---------------|--------------|-------------|-------------|
| ENSMUSG00000025375 | Aatk          | -0.039810837 | 0.542659896 | 0.772218408 |
| ENSMUSG00000082062 | Ftl2-ps       | 0.047142011  | 0.542634457 | 0.772218408 |
| ENSMUSG00000021257 | Angel1        | -0.029406226 | 0.542831998 | 0.772250171 |
| ENSMUSG00000026755 | Arpc5l        | -0.053732549 | 0.542935571 | 0.772309062 |
| ENSMUSG00000033909 | Usp36         | -0.051417509 | 0.543048609 | 0.772337369 |
| ENSMUSG00000037214 | Thap1         | -0.050580872 | 0.543079831 | 0.772337369 |
| ENSMUSG00000031444 | F10           | 0.053723683  | 0.543262573 | 0.772508806 |
| ENSMUSG00000021192 | Golga5        | -0.050609072 | 0.543466773 | 0.77253385  |
| ENSMUSG00000024654 | Asrgl1        | 0.053466627  | 0.543394528 | 0.77253385  |
| ENSMUSG00000024677 | Ms4a6b        | -0.052918697 | 0.543405579 | 0.77253385  |
| ENSMUSG00000015488 | Cacfd1        | -0.053385299 | 0.543643482 | 0.772696612 |
| ENSMUSG00000014245 | Pigl          | 0.054693286  | 0.543817136 | 0.772786287 |
| ENSMUSG00000024790 | Sac3d1        | -0.053298257 | 0.543851096 | 0.772786287 |
| ENSMUSG00000061665 | Cd2ap         | 0.044511072  | 0.543893223 | 0.772786287 |
| ENSMUSG00000026839 | Upp2          | -0.027349701 | 0.544012503 | 0.772800934 |
| ENSMUSG00000089844 | A530032D15Rik | 0.04034792   | 0.544027966 | 0.772800934 |
| ENSMUSG00000021867 | Tmem254b      | -0.053652064 | 0.54433157  | 0.773143789 |
| ENSMUSG00000117145 | AC170998.1    | 0.032346585  | 0.544512997 | 0.77331305  |
| ENSMUSG00000075701 | Selenos       | 0.053459024  | 0.544603003 | 0.773352452 |
| ENSMUSG00000022722 | Arl6          | 0.054433322  | 0.54470693  | 0.773411612 |
| ENSMUSG00000021215 | Net1          | 0.052690143  | 0.544887526 | 0.773419529 |
| ENSMUSG00000044477 | Zfand3        | -0.034359862 | 0.544809989 | 0.773419529 |
| ENSMUSG00000074519 | Zfp971        | -0.050875903 | 0.544899308 | 0.773419529 |
| ENSMUSG00000040565 | Btaf1         | 0.050199049  | 0.544964713 | 0.773423984 |
| ENSMUSG00000042331 | Specc1        | -0.054055955 | 0.545112729 | 0.7734573   |
| ENSMUSG00000062825 | Actg1         | 0.052380716  | 0.545100412 | 0.7734573   |
| ENSMUSG00000026807 | Ak8           | -0.02996896  | 0.545193703 | 0.773483837 |
| ENSMUSG00000020608 | Smc6          | -0.043519522 | 0.545266564 | 0.773498857 |
| ENSMUSG00000024158 | Hagh          | 0.051011093  | 0.545357222 | 0.773539118 |
| ENSMUSG00000025888 | Casp1         | 0.051294938  | 0.545719498 | 0.773744662 |
| ENSMUSG00000026659 | Dusp12        | 0.053737731  | 0.545989754 | 0.773744662 |
| ENSMUSG00000031878 | Nae1          | 0.047227168  | 0.545698689 | 0.773744662 |
| ENSMUSG00000041238 | Rbbp8         | -0.05305428  | 0.546050756 | 0.773744662 |
| ENSMUSG00000045374 | Wdr81         | 0.04387298   | 0.546062773 | 0.773744662 |
| ENSMUSG00000048277 | Syng2         | 0.044337546  | 0.545801369 | 0.773744662 |
| ENSMUSG00000069289 | Vmn1r203      | 0.038623216  | 0.545897043 | 0.773744662 |
| ENSMUSG00000078970 | Wdr92         | 0.051061558  | 0.545770937 | 0.773744662 |
| ENSMUSG00000090145 | Ugt1a6b       | 0.029245121  | 0.545826181 | 0.773744662 |
| ENSMUSG00000022201 | Zfr           | -0.046458429 | 0.546258536 | 0.773745011 |
| ENSMUSG00000028413 | B4galt1       | 0.05127475   | 0.546176217 | 0.773745011 |
| ENSMUSG00000063889 | Crem          | -0.049734082 | 0.546312193 | 0.773745011 |
| ENSMUSG00000081121 | Gm12791       | 0.05048248   | 0.546229291 | 0.773745011 |
| ENSMUSG00000057176 | Ccdc189       | -0.042508551 | 0.546467854 | 0.773877233 |

|                    |            |              |             |             |
|--------------------|------------|--------------|-------------|-------------|
| ENSMUSG00000024563 | Smad2      | -0.053693176 | 0.546768754 | 0.774215081 |
| ENSMUSG00000098923 | Tmem185b   | -0.052821129 | 0.546892191 | 0.774301597 |
| ENSMUSG00000052428 | Tmco1      | 0.047717972  | 0.54734536  | 0.774854879 |
| ENSMUSG00000023951 | Vegfa      | -0.053501494 | 0.547729513 | 0.775222001 |
| ENSMUSG00000032316 | Clk3       | -0.053509868 | 0.547703867 | 0.775222001 |
| ENSMUSG00000014243 | Zswim7     | 0.054084124  | 0.54790039  | 0.775272248 |
| ENSMUSG00000021708 | Rasgrf2    | -0.025662463 | 0.547937394 | 0.775272248 |
| ENSMUSG00000024908 | Ppp6r3     | 0.043592282  | 0.548014679 | 0.775272248 |
| ENSMUSG00000039929 | Urb1       | 0.036218514  | 0.548007032 | 0.775272248 |
| ENSMUSG00000062093 | Gm10110    | 0.044548561  | 0.548169689 | 0.77529217  |
| ENSMUSG00000089988 | Gm16238    | 0.028130425  | 0.548216016 | 0.77529217  |
| ENSMUSG00000117409 | CT010580.1 | 0.032411256  | 0.548161524 | 0.77529217  |
| ENSMUSG00000015027 | Galns      | 0.049072679  | 0.548359531 | 0.775406845 |
| ENSMUSG00000020721 | Helz       | 0.047934318  | 0.54866186  | 0.775746041 |
| ENSMUSG00000002319 | Ipo4       | 0.0542117    | 0.54900827  | 0.775764037 |
| ENSMUSG00000005374 | Tbl2       | -0.050712378 | 0.549163001 | 0.775764037 |
| ENSMUSG00000014767 | Tbp        | -0.051584299 | 0.549100063 | 0.775764037 |
| ENSMUSG00000037851 | Iars       | -0.048414723 | 0.549028128 | 0.775764037 |
| ENSMUSG00000062995 | Ica1       | 0.053956588  | 0.548778738 | 0.775764037 |
| ENSMUSG00000093505 | Gm20691    | -0.017927351 | 0.549021712 | 0.775764037 |
| ENSMUSG00000112909 | Gm10120    | 0.053363153  | 0.549174235 | 0.775764037 |
| ENSMUSG00000115630 | Rpl19-ps5  | 0.028330229  | 0.549064066 | 0.775764037 |
| ENSMUSG00000049775 | Tmsb4x     | -0.049413037 | 0.549555452 | 0.776214267 |
| ENSMUSG00000111640 | AC109138.2 | 0.034149844  | 0.549662271 | 0.77627687  |
| ENSMUSG00000072258 | Taf1a      | -0.055777777 | 0.549814999 | 0.776404287 |
| ENSMUSG00000096745 | Gm12622    | 0.034580636  | 0.550077474 | 0.776686632 |
| ENSMUSG00000067722 | BC003965   | 0.051463504  | 0.550444115 | 0.777115976 |
| ENSMUSG00000047250 | Ptgs1      | -0.046071769 | 0.550709004 | 0.777167712 |
| ENSMUSG00000063931 | Pepd       | 0.048287012  | 0.550731036 | 0.777167712 |
| ENSMUSG00000078546 | Zfp995     | 0.050634147  | 0.550656911 | 0.777167712 |
| ENSMUSG00000105360 | Gm7824     | 0.040828868  | 0.550716854 | 0.777167712 |
| ENSMUSG00000070576 | Mn1        | -0.029228943 | 0.550806018 | 0.777185226 |
| ENSMUSG00000035215 | Lsm7       | 0.053172691  | 0.550949257 | 0.777210757 |
| ENSMUSG00000090272 | Mndal      | -0.052139127 | 0.550927149 | 0.777210757 |
| ENSMUSG00000022462 | Slc38a2    | 0.045804415  | 0.551242204 | 0.777359152 |
| ENSMUSG00000030086 | Chchd6     | 0.05240039   | 0.551132327 | 0.777359152 |
| ENSMUSG00000040018 | Cox15      | -0.051423412 | 0.551231196 | 0.777359152 |
| ENSMUSG00000018293 | Pfn1       | 0.053450614  | 0.551356398 | 0.777401714 |
| ENSMUSG00000091955 | Gm9844     | -0.009239552 | 0.551460149 | 0.777401714 |
| ENSMUSG00000100801 | Gm15459    | 0.049145752  | 0.551451038 | 0.777401714 |
| ENSMUSG00000033454 | Zbtb1      | -0.051432409 | 0.551559821 | 0.777453987 |
| ENSMUSG00000028597 | Gpx7       | 0.022262279  | 0.55170295  | 0.777567496 |
| ENSMUSG00000051037 | Zfp455     | -0.037526576 | 0.551997229 | 0.777811563 |

|                    |            |              |             |             |
|--------------------|------------|--------------|-------------|-------------|
| ENSMUSG00000051864 | Tbc1d22a   | 0.052691159  | 0.552001363 | 0.777811563 |
| ENSMUSG00000020783 | Ncbp3      | 0.053516055  | 0.552315236 | 0.777812647 |
| ENSMUSG00000024208 | Uqcc2      | 0.053133338  | 0.552130883 | 0.777812647 |
| ENSMUSG00000025218 | Poll       | -0.052119412 | 0.552278145 | 0.777812647 |
| ENSMUSG00000027009 | Itga4      | 0.052913874  | 0.552244407 | 0.777812647 |
| ENSMUSG00000030067 | Foxp1      | -0.052962055 | 0.552087079 | 0.777812647 |
| ENSMUSG00000043290 | Zfp784     | -0.036079178 | 0.552497329 | 0.777937689 |
| ENSMUSG00000044795 | Cyb5d1     | -0.046212905 | 0.552529288 | 0.777937689 |
| ENSMUSG00000048280 | Zfp738     | 0.05124855   | 0.552686786 | 0.778071242 |
| ENSMUSG00000034265 | Zdhhc14    | -0.039442115 | 0.552798958 | 0.778092606 |
| ENSMUSG00000053950 | Adnp2      | -0.050469055 | 0.552827248 | 0.778092606 |
| ENSMUSG00000032534 | Cep63      | 0.047740521  | 0.552934963 | 0.778124466 |
| ENSMUSG00000035725 | Prkx       | -0.050916812 | 0.553100468 | 0.778124466 |
| ENSMUSG00000038250 | Usp38      | 0.049395806  | 0.553086957 | 0.778124466 |
| ENSMUSG00000054942 | Miga1      | 0.053190274  | 0.552994788 | 0.778124466 |
| ENSMUSG00000052783 | Grk4       | 0.036484075  | 0.55359024  | 0.778725296 |
| ENSMUSG00000075015 | Gm10801    | -0.010966145 | 0.553743741 | 0.778853018 |
| ENSMUSG00000008450 | Nutf2      | 0.05341253   | 0.55399765  | 0.778940697 |
| ENSMUSG00000020634 | Ubxn2a     | 0.049697025  | 0.554119636 | 0.778940697 |
| ENSMUSG00000027569 | Mrgbp      | 0.053120253  | 0.553961189 | 0.778940697 |
| ENSMUSG00000028669 | Pithd1     | -0.053063039 | 0.554023019 | 0.778940697 |
| ENSMUSG00000031827 | Cotl1      | -0.045744805 | 0.554068397 | 0.778940697 |
| ENSMUSG00000025085 | Ablim1     | -0.029489025 | 0.554296184 | 0.779040597 |
| ENSMUSG00000030614 | Tmem126b   | -0.0526438   | 0.554316142 | 0.779040597 |
| ENSMUSG00000015846 | Rxra       | 0.025551745  | 0.554437828 | 0.779118648 |
| ENSMUSG00000032218 | Ccnb2      | 0.052993548  | 0.55449713  | 0.779118648 |
| ENSMUSG00000026803 | Ttf1       | -0.05251682  | 0.554597009 | 0.779170846 |
| ENSMUSG00000068860 | Gm128      | -0.037938623 | 0.555031418 | 0.77969297  |
| ENSMUSG00000030761 | Myo7a      | -0.049806726 | 0.55509621  | 0.779695808 |
| ENSMUSG00000066735 | Vkorc1l1   | -0.049491564 | 0.555244798 | 0.779816331 |
| ENSMUSG00000028034 | Fubp1      | 0.049907927  | 0.555495934 | 0.780080836 |
| ENSMUSG00000017307 | Acot8      | 0.052504426  | 0.555766671 | 0.780369829 |
| ENSMUSG00000019461 | Plscr3     | -0.052630056 | 0.556005883 | 0.780369829 |
| ENSMUSG00000020128 | Vps54      | 0.041890796  | 0.556012259 | 0.780369829 |
| ENSMUSG00000033720 | Sfxn5      | -0.027424308 | 0.555898888 | 0.780369829 |
| ENSMUSG00000083757 | Rps15a-ps4 | 0.037589791  | 0.556015859 | 0.780369829 |
| ENSMUSG00000024130 | Abca3      | -0.038787301 | 0.55615587  | 0.780384583 |
| ENSMUSG00000038697 | Taf5l      | 0.051167176  | 0.556214855 | 0.780384583 |
| ENSMUSG00000049011 | Olfir729   | -0.049119658 | 0.556213871 | 0.780384583 |
| ENSMUSG00000026478 | Lamc1      | -0.019367234 | 0.556576716 | 0.78071591  |
| ENSMUSG00000035021 | Baz1a      | 0.052851594  | 0.556564325 | 0.78071591  |
| ENSMUSG00000020925 | Ccdc43     | 0.047672398  | 0.557201632 | 0.781284076 |
| ENSMUSG00000024754 | Cemip2     | 0.041239163  | 0.557192496 | 0.781284076 |

|                    |               |              |             |             |
|--------------------|---------------|--------------|-------------|-------------|
| ENSMUSG00000024900 | Cpt1a         | 0.051505181  | 0.557186615 | 0.781284076 |
| ENSMUSG00000030365 | Clec2i        | -0.0429025   | 0.557257649 | 0.781284076 |
| ENSMUSG00000036545 | Adamts2       | -0.029359205 | 0.557296266 | 0.781284076 |
| ENSMUSG00000069743 | Zfp820        | -0.041021018 | 0.557606707 | 0.78163107  |
| ENSMUSG00000045381 | Olfr433       | -0.034538233 | 0.557948734 | 0.782022256 |
| ENSMUSG00000089774 | Slc5a3        | -0.02937434  | 0.558031263 | 0.782049681 |
| ENSMUSG00000022824 | Muc13         | 0.052952426  | 0.558239506 | 0.78225326  |
| ENSMUSG00000024725 | Ostf1         | 0.043752306  | 0.558406816 | 0.782326679 |
| ENSMUSG00000030435 | U2af2         | -0.04910988  | 0.558417868 | 0.782326679 |
| ENSMUSG00000038174 | Fam126b       | -0.031975187 | 0.558502099 | 0.782356443 |
| ENSMUSG00000027637 | Rab5if        | 0.049181547  | 0.558647831 | 0.78247234  |
| ENSMUSG00000026585 | Kifap3        | -0.052209935 | 0.558740527 | 0.782513935 |
| ENSMUSG00000022724 | Riox2         | 0.050064083  | 0.558906715 | 0.782658434 |
| ENSMUSG00000013736 | Trnt1         | 0.051556761  | 0.559033637 | 0.782747921 |
| ENSMUSG00000028788 | Ptp4a2        | 0.051847892  | 0.559103948 | 0.782758131 |
| ENSMUSG00000063052 | Lrrc40        | -0.052087823 | 0.559293714 | 0.78293556  |
| ENSMUSG00000031969 | Acad8         | -0.051856369 | 0.559464723 | 0.782977077 |
| ENSMUSG00000032802 | Srxn1         | -0.032019721 | 0.559512482 | 0.782977077 |
| ENSMUSG00000042874 | D930007J09Rik | -0.044347338 | 0.55945767  | 0.782977077 |
| ENSMUSG00000031575 | Ash2l         | -0.043312878 | 0.559699627 | 0.783150734 |
| ENSMUSG00000003721 | Insig2        | -0.051491785 | 0.559823296 | 0.783203039 |
| ENSMUSG00000020544 | Cox11         | 0.049780357  | 0.559989227 | 0.783203039 |
| ENSMUSG00000032171 | Pin1          | 0.052421957  | 0.559977427 | 0.783203039 |
| ENSMUSG00000034931 | Dhx8          | 0.050743591  | 0.559900564 | 0.783203039 |
| ENSMUSG00000033792 | Atp7a         | 0.030615563  | 0.560420516 | 0.783453374 |
| ENSMUSG00000037474 | Dtl           | -0.051633544 | 0.560370135 | 0.783453374 |
| ENSMUSG00000058355 | Abce1         | 0.049069334  | 0.56039094  | 0.783453374 |
| ENSMUSG00000066807 | Gm10179       | 0.041400289  | 0.560296193 | 0.783453374 |
| ENSMUSG00000021692 | Dimt1         | 0.051423551  | 0.560592852 | 0.783462851 |
| ENSMUSG00000031156 | Slc35a2       | -0.049119151 | 0.560510397 | 0.783462851 |
| ENSMUSG00000063659 | Zbtb18        | -0.041928628 | 0.560616522 | 0.783462851 |
| ENSMUSG00000048960 | Prex2         | 0.028232017  | 0.560863639 | 0.78372002  |
| ENSMUSG00000066406 | Akap13        | 0.051474278  | 0.561033329 | 0.783868951 |
| ENSMUSG00000034353 | Ramp1         | 0.048509019  | 0.561193124 | 0.784004026 |
| ENSMUSG00000079555 | Haus3         | 0.050505596  | 0.561271406 | 0.784025206 |
| ENSMUSG00000034297 | Med13         | -0.044101967 | 0.561389628 | 0.784102167 |
| ENSMUSG00000062908 | Acadm         | -0.051257714 | 0.561585121 | 0.784287023 |
| ENSMUSG00000111331 | CT010495.1    | -0.026813623 | 0.561813642 | 0.784517959 |
| ENSMUSG00000039047 | Pigk          | 0.052185261  | 0.561984478 | 0.784580105 |
| ENSMUSG00000112689 | Gm47476       | -0.02372914  | 0.561939956 | 0.784580105 |
| ENSMUSG00000001524 | Gtf2h4        | -0.048052247 | 0.562244308 | 0.784854636 |
| ENSMUSG00000006736 | Tspan31       | -0.045283817 | 0.562703093 | 0.784931262 |
| ENSMUSG00000025872 | Thoc3         | 0.05048661   | 0.562520723 | 0.784931262 |

|                    |             |              |             |             |
|--------------------|-------------|--------------|-------------|-------------|
| ENSMUSG00000032187 | Smarca4     | 0.050483752  | 0.562631141 | 0.784931262 |
| ENSMUSG00000040220 | Gas8        | 0.051378122  | 0.562701799 | 0.784931262 |
| ENSMUSG00000057160 | Gm16372     | -0.023482394 | 0.562741558 | 0.784931262 |
| ENSMUSG00000112351 | Gm48326     | 0.036737909  | 0.562472244 | 0.784931262 |
| ENSMUSG00000116564 | Riok2       | 0.051862462  | 0.562620434 | 0.784931262 |
| ENSMUSG00000053012 | Krcc1       | -0.050855291 | 0.562820787 | 0.784953627 |
| ENSMUSG00000000934 | Top1mt      | 0.048019743  | 0.563155393 | 0.785101326 |
| ENSMUSG00000024533 | Spire1      | 0.042230731  | 0.563154037 | 0.785101326 |
| ENSMUSG00000026158 | Ogfrl1      | -0.049310151 | 0.563192571 | 0.785101326 |
| ENSMUSG00000038658 | Ric1        | 0.034316515  | 0.563080517 | 0.785101326 |
| ENSMUSG00000090641 | Zfp712      | -0.026908666 | 0.563242727 | 0.785101326 |
| ENSMUSG00000036199 | Ndufa13     | 0.051479953  | 0.563470452 | 0.78533062  |
| ENSMUSG00000006289 | Osgep       | -0.043293281 | 0.563898572 | 0.785398538 |
| ENSMUSG00000023572 | Ccndbp1     | -0.050990486 | 0.563841682 | 0.785398538 |
| ENSMUSG00000031967 | Afg3l1      | -0.048676373 | 0.563777148 | 0.785398538 |
| ENSMUSG00000049076 | Acap2       | 0.051808607  | 0.563613413 | 0.785398538 |
| ENSMUSG00000052397 | Ezr         | 0.049128007  | 0.563661887 | 0.785398538 |
| ENSMUSG00000057329 | Bcl2        | -0.049460748 | 0.563798066 | 0.785398538 |
| ENSMUSG00000047067 | Dusp28      | 0.051769797  | 0.564026418 | 0.785488524 |
| ENSMUSG00000069294 | Vmn1r197    | -0.034471853 | 0.564292605 | 0.785771126 |
| ENSMUSG00000111527 | Nadk2       | 0.039247882  | 0.564481457 | 0.78594599  |
| ENSMUSG00000038611 | Phrf1       | -0.051206888 | 0.565141803 | 0.786600889 |
| ENSMUSG00000051510 | Mafg        | 0.049649367  | 0.565066592 | 0.786600889 |
| ENSMUSG00000069727 | Zfp975      | -0.04601925  | 0.565085196 | 0.786600889 |
| ENSMUSG00000028107 | Tars2       | -0.051011147 | 0.565225588 | 0.786627019 |
| ENSMUSG00000050229 | Pigm        | 0.049958429  | 0.565287237 | 0.786627019 |
| ENSMUSG00000037111 | Setd7       | 0.033573568  | 0.565480187 | 0.786807371 |
| ENSMUSG00000035683 | Melk        | -0.049161141 | 0.56570675  | 0.787034447 |
| ENSMUSG00000031822 | Gse1        | -0.042765421 | 0.565812118 | 0.78709288  |
| ENSMUSG00000000374 | Trappc10    | 0.05138543   | 0.566198426 | 0.787453885 |
| ENSMUSG00000039041 | Adrm1       | 0.052196155  | 0.566163835 | 0.787453885 |
| ENSMUSG00000029560 | Snx8        | -0.049256025 | 0.566302277 | 0.787510142 |
| ENSMUSG00000036902 | Neto2       | 0.048072504  | 0.566536971 | 0.787748318 |
| ENSMUSG00000003271 | Sult2b1     | -0.031744883 | 0.566648443 | 0.787815123 |
| ENSMUSG00000026019 | Wdr12       | 0.050497472  | 0.566759846 | 0.78787294  |
| ENSMUSG00000034471 | Caskin2     | 0.029866723  | 0.567034011 | 0.78787294  |
| ENSMUSG00000038664 | Herc1       | 0.040715458  | 0.567043094 | 0.78787294  |
| ENSMUSG00000040818 | Dennd6a     | 0.051045753  | 0.566841982 | 0.78787294  |
| ENSMUSG00000089936 | Gm16199     | 0.049053262  | 0.567070613 | 0.78787294  |
| ENSMUSG00000094568 | Smarce1-ps1 | 0.05113715   | 0.567042383 | 0.78787294  |
| ENSMUSG00000058173 | Smco4       | -0.046240118 | 0.567257506 | 0.787956328 |
| ENSMUSG00000109975 | Gm19196     | 0.040713416  | 0.567253062 | 0.787956328 |
| ENSMUSG00000006143 | Upk3bl      | 0.033297071  | 0.56741535  | 0.788087449 |

|                    |          |              |             |             |
|--------------------|----------|--------------|-------------|-------------|
| ENSMUSG00000046593 | Tmem215  | -0.033410291 | 0.567566019 | 0.788178444 |
| ENSMUSG00000104713 | Gbp6     | -0.016745002 | 0.567607776 | 0.788178444 |
| ENSMUSG00000027452 | Acss1    | 0.047112732  | 0.567780455 | 0.788330096 |
| ENSMUSG00000047539 | Fbxo28   | -0.049981662 | 0.568284133 | 0.788941234 |
| ENSMUSG00000000743 | Chmp1a   | 0.048973813  | 0.568562512 | 0.788957247 |
| ENSMUSG00000020895 | Tmem107  | -0.045597618 | 0.568520718 | 0.788957247 |
| ENSMUSG00000022391 | Rangap1  | -0.048712977 | 0.568778946 | 0.788957247 |
| ENSMUSG00000024851 | Pitpnm1  | 0.051091737  | 0.56847529  | 0.788957247 |
| ENSMUSG00000024891 | Slc29a2  | -0.046229228 | 0.568740611 | 0.788957247 |
| ENSMUSG00000026309 | Ilkap    | 0.048252923  | 0.568653651 | 0.788957247 |
| ENSMUSG00000031095 | Cul4b    | 0.049145483  | 0.5687464   | 0.788957247 |
| ENSMUSG00000048696 | Mex3d    | 0.035422592  | 0.568803812 | 0.788957247 |
| ENSMUSG00000000037 | Scml2    | -0.033486377 | 0.569053674 | 0.789066921 |
| ENSMUSG00000032280 | Tle3     | 0.031434535  | 0.568980492 | 0.789066921 |
| ENSMUSG00000034041 | Lyl1     | -0.050549377 | 0.569073463 | 0.789066921 |
| ENSMUSG00000038970 | Lmtk2    | 0.030535939  | 0.569203598 | 0.78915927  |
| ENSMUSG00000002728 | Naa20    | 0.051775301  | 0.569366256 | 0.789296681 |
| ENSMUSG00000024639 | Gnaq     | -0.043354485 | 0.569468595 | 0.789350455 |
| ENSMUSG00000002732 | Fkbp7    | -0.044181658 | 0.570408758 | 0.789444072 |
| ENSMUSG00000005107 | Slc2a9   | -0.032674234 | 0.570069968 | 0.789444072 |
| ENSMUSG00000021675 | F2rl2    | 0.0314446087 | 0.570211577 | 0.789444072 |
| ENSMUSG00000030779 | Rbbp6    | 0.049114532  | 0.569857399 | 0.789444072 |
| ENSMUSG00000030965 | Abraxas2 | 0.047251601  | 0.569694452 | 0.789444072 |
| ENSMUSG00000031974 | Abcb10   | 0.046908201  | 0.570304522 | 0.789444072 |
| ENSMUSG00000034285 | Nipsnap1 | 0.049932627  | 0.570425936 | 0.789444072 |
| ENSMUSG00000037486 | Asxl2    | 0.048667568  | 0.570292156 | 0.789444072 |
| ENSMUSG00000044792 | Isca1    | -0.047419652 | 0.569637037 | 0.789444072 |
| ENSMUSG00000052533 | Nup188   | 0.050711083  | 0.570075365 | 0.789444072 |
| ENSMUSG00000057554 | Lgals8   | -0.047700006 | 0.570083641 | 0.789444072 |
| ENSMUSG00000064128 | Cenpj    | 0.041806568  | 0.570174058 | 0.789444072 |
| ENSMUSG00000074807 | Gm10762  | 0.048178596  | 0.569735474 | 0.789444072 |
| ENSMUSG00000107741 | Gm2011   | 0.041351675  | 0.570111814 | 0.789444072 |
| ENSMUSG00000045503 | Sys1     | 0.051340491  | 0.570610022 | 0.789610861 |
| ENSMUSG00000022663 | Atg3     | 0.0503415    | 0.570818804 | 0.789700366 |
| ENSMUSG00000036022 | Fam122b  | 0.050180255  | 0.570865437 | 0.789700366 |
| ENSMUSG00000109764 | Klkb1    | -0.050425961 | 0.570807572 | 0.789700366 |
| ENSMUSG00000054434 | Tmem120b | -0.038688773 | 0.571057864 | 0.789792528 |
| ENSMUSG00000078497 | Zfp978   | -0.03075755  | 0.57105923  | 0.789792528 |
| ENSMUSG00000083627 | Gm12502  | 0.03153293   | 0.571138606 | 0.789814365 |
| ENSMUSG00000020042 | Btbd11   | -0.031158093 | 0.571375588 | 0.789929128 |
| ENSMUSG00000040663 | Clcf1    | -0.019955399 | 0.571404347 | 0.789929128 |
| ENSMUSG00000068391 | Chrac1   | 0.050159928  | 0.571412383 | 0.789929128 |
| ENSMUSG00000063108 | Zfp26    | 0.03348197   | 0.571549016 | 0.790030083 |

|                    |               |              |             |             |
|--------------------|---------------|--------------|-------------|-------------|
| ENSMUSG00000024742 | Fen1          | -0.06551713  | 0.572050608 | 0.790402311 |
| ENSMUSG00000041264 | Usp11         | 0.050123766  | 0.571887069 | 0.790402311 |
| ENSMUSG00000042831 | Alkbh6        | -0.04606151  | 0.571993742 | 0.790402311 |
| ENSMUSG00000053706 | B430305J03Rik | 0.046700125  | 0.572090086 | 0.790402311 |
| ENSMUSG00000090799 | Klhl33        | -0.032956337 | 0.572136477 | 0.790402311 |
| ENSMUSG00000002279 | Lmf1          | -0.05005175  | 0.572353542 | 0.790614251 |
| ENSMUSG00000041471 | Shld2         | -0.04763506  | 0.572511592 | 0.790744634 |
| ENSMUSG00000033102 | Cdc14b        | -0.028696784 | 0.572737154 | 0.790968222 |
| ENSMUSG00000046916 | Myct1         | 0.026338727  | 0.572815996 | 0.790989159 |
| ENSMUSG00000024002 | Brd4          | -0.04754579  | 0.573151514 | 0.79123059  |
| ENSMUSG00000030560 | Ctsc          | 0.050597507  | 0.573181938 | 0.79123059  |
| ENSMUSG00000096856 | Gm10778       | 0.048980102  | 0.573128545 | 0.79123059  |
| ENSMUSG00000036580 | Spg20         | -0.050188118 | 0.573458736 | 0.79152472  |
| ENSMUSG00000020638 | Cmpk2         | -0.048918415 | 0.573826367 | 0.79173151  |
| ENSMUSG00000025016 | Tm9sf3        | 0.041955853  | 0.57386352  | 0.79173151  |
| ENSMUSG00000036352 | Ubac1         | -0.046090288 | 0.573827597 | 0.79173151  |
| ENSMUSG00000110469 | Gm10358       | 0.013408501  | 0.573834297 | 0.79173151  |
| ENSMUSG00000028860 | Sytl1         | 0.038969284  | 0.574084342 | 0.791860256 |
| ENSMUSG00000108608 | Gm6916        | -0.013293271 | 0.574059792 | 0.791860256 |
| ENSMUSG00000017756 | Slc12a7       | -0.021929199 | 0.574307946 | 0.791992783 |
| ENSMUSG00000051786 | Tubgcp6       | 0.044935233  | 0.574283526 | 0.791992783 |
| ENSMUSG00000006392 | Med8          | 0.0498126    | 0.574452655 | 0.792053145 |
| ENSMUSG00000030559 | Rab38         | 0.050243324  | 0.574479251 | 0.792053145 |
| ENSMUSG00000037640 | Zfp60         | -0.03632197  | 0.574681529 | 0.792156173 |
| ENSMUSG00000081378 | Rps13-ps4     | -0.027936309 | 0.574624248 | 0.792156173 |
| ENSMUSG00000008398 | Elk3          | 0.050294446  | 0.574825273 | 0.792178488 |
| ENSMUSG00000022681 | Ntan1         | 0.045255881  | 0.574797631 | 0.792178488 |
| ENSMUSG00000053460 | Ggcx          | -0.048242742 | 0.574943144 | 0.792253028 |
| ENSMUSG00000038070 | Cntln         | -0.049954876 | 0.575090242 | 0.79236782  |
| ENSMUSG00000020368 | Canx          | 0.049308457  | 0.575486399 | 0.792748805 |
| ENSMUSG00000044502 | Bod1          | 0.050236745  | 0.575494403 | 0.792748805 |
| ENSMUSG00000021733 | Slc4a7        | -0.038332031 | 0.575669449 | 0.792814084 |
| ENSMUSG00000029146 | Snx17         | -0.0469629   | 0.575624793 | 0.792814084 |
| ENSMUSG00000019943 | Atp2b1        | 0.049583365  | 0.5758897   | 0.793029486 |
| ENSMUSG00000042659 | Arrdc4        | 0.049767711  | 0.575998388 | 0.79309123  |
| ENSMUSG00000022124 | Fbxl3         | -0.049274554 | 0.576441813 | 0.793613807 |
| ENSMUSG00000034126 | Pomt2         | -0.044084249 | 0.576525796 | 0.793641462 |
| ENSMUSG00000067851 | Arfgef1       | -0.049011399 | 0.576622483 | 0.793686598 |
| ENSMUSG00000022673 | Mcm4          | -0.04859057  | 0.576769072 | 0.793702673 |
| ENSMUSG00000024008 | Cpne5         | -0.02013286  | 0.576825862 | 0.793702673 |
| ENSMUSG00000026739 | Bmi1          | -0.045712476 | 0.576809079 | 0.793702673 |
| ENSMUSG00000002718 | Cse1l         | 0.048475244  | 0.577151492 | 0.793821592 |
| ENSMUSG00000005501 | Usp40         | -0.040903932 | 0.577295745 | 0.793821592 |

|                    |          |              |             |             |
|--------------------|----------|--------------|-------------|-------------|
| ENSMUSG00000028696 | Ipp      | -0.049411087 | 0.577293161 | 0.793821592 |
| ENSMUSG00000032198 | Dock6    | -0.023217698 | 0.577195461 | 0.793821592 |
| ENSMUSG00000041025 | Iffo2    | -0.036526174 | 0.577268532 | 0.793821592 |
| ENSMUSG00000062110 | Scfd2    | -0.048233207 | 0.577248899 | 0.793821592 |
| ENSMUSG00000006241 | Ccdc159  | 0.027600164  | 0.577705594 | 0.794054651 |
| ENSMUSG00000024791 | Cdca5    | -0.049520698 | 0.577553214 | 0.794054651 |
| ENSMUSG00000041164 | Zmiz2    | -0.044380891 | 0.577720947 | 0.794054651 |
| ENSMUSG00000061111 | Mcrip1   | -0.047057684 | 0.577691391 | 0.794054651 |
| ENSMUSG00000022132 | Cldn10   | 0.025239737  | 0.577906057 | 0.794186101 |
| ENSMUSG00000045378 | Pxt1     | 0.021081188  | 0.578008401 | 0.794186101 |
| ENSMUSG00000103374 | Gm37239  | -0.042100164 | 0.577997066 | 0.794186101 |
| ENSMUSG00000102827 | Gm8242   | 0.044170305  | 0.578180503 | 0.794334701 |
| ENSMUSG00000042390 | Gatad2b  | 0.048117243  | 0.578361178 | 0.794495044 |
| ENSMUSG00000018189 | Uchl5    | 0.047893533  | 0.57860467  | 0.794656677 |
| ENSMUSG00000034300 | Fam53c   | 0.039208512  | 0.578670771 | 0.794656677 |
| ENSMUSG00000060090 | Rp2      | -0.048118872 | 0.57866678  | 0.794656677 |
| ENSMUSG00000039509 | Nup133   | -0.044923102 | 0.578798823 | 0.794744659 |
| ENSMUSG00000020029 | Nudt4    | 0.04730303   | 0.578912517 | 0.794775913 |
| ENSMUSG00000024399 | Ltb      | -0.03202605  | 0.578949558 | 0.794775913 |
| ENSMUSG00000007833 | Aldh16a1 | -0.048910363 | 0.579595272 | 0.794852562 |
| ENSMUSG00000022178 | Ajuba    | -0.035827889 | 0.579490336 | 0.794852562 |
| ENSMUSG00000025408 | Ddit3    | -0.049265766 | 0.579418867 | 0.794852562 |
| ENSMUSG00000030681 | Mvp      | -0.048846955 | 0.579606036 | 0.794852562 |
| ENSMUSG00000035004 | Igsf6    | -0.047205981 | 0.579773304 | 0.794852562 |
| ENSMUSG00000041712 | Ubr7     | -0.044781154 | 0.579446388 | 0.794852562 |
| ENSMUSG00000042345 | Ubash3a  | 0.049281815  | 0.579517356 | 0.794852562 |
| ENSMUSG00000043439 | Epop     | -0.045604431 | 0.579564514 | 0.794852562 |
| ENSMUSG00000047090 | Tmem198b | -0.041085219 | 0.579723747 | 0.794852562 |
| ENSMUSG00000059714 | Flot1    | -0.042094812 | 0.579309912 | 0.794852562 |
| ENSMUSG00000063015 | Ccni     | 0.048027842  | 0.579699556 | 0.794852562 |
| ENSMUSG00000064037 | Gpn1     | -0.047279443 | 0.579580898 | 0.794852562 |
| ENSMUSG00000026198 | Abcb6    | -0.049284714 | 0.579927126 | 0.794864596 |
| ENSMUSG00000034247 | Plekhm1  | -0.041664071 | 0.579974063 | 0.794864596 |
| ENSMUSG00000044595 | Dnd1     | 0.040366219  | 0.579928283 | 0.794864596 |
| ENSMUSG00000026500 | Cox20    | 0.048039491  | 0.580176755 | 0.794966958 |
| ENSMUSG00000042099 | Kank3    | 0.046115672  | 0.580171215 | 0.794966958 |
| ENSMUSG00000054871 | Tmem158  | 0.037628081  | 0.580262398 | 0.794996607 |
| ENSMUSG00000024423 | Impact   | -0.041252749 | 0.580509342 | 0.795175957 |
| ENSMUSG00000030035 | Wbp1     | -0.047937264 | 0.580623431 | 0.795175957 |
| ENSMUSG00000038515 | Grtp1    | -0.033831758 | 0.580572336 | 0.795175957 |
| ENSMUSG00000048170 | Mcmbp    | 0.044878937  | 0.580649378 | 0.795175957 |
| ENSMUSG00000097239 | Gm27029  | 0.032463756  | 0.580751294 | 0.795227849 |
| ENSMUSG00000032507 | Fbxl2    | 0.04093662   | 0.580913996 | 0.795362957 |

|                    |            |              |             |             |
|--------------------|------------|--------------|-------------|-------------|
| ENSMUSG00000025017 | Pik3ap1    | -0.046688074 | 0.581095123 | 0.79551739  |
| ENSMUSG00000030731 | Syt3       | -0.028707567 | 0.581154883 | 0.79551739  |
| ENSMUSG00000027365 | Trpm7      | 0.049074034  | 0.581446036 | 0.795828232 |
| ENSMUSG00000022365 | Derl1      | 0.045390922  | 0.581713352 | 0.795930992 |
| ENSMUSG00000040842 | Szrd1      | 0.049068264  | 0.581615422 | 0.795930992 |
| ENSMUSG00000042055 | Wdr11      | 0.035476789  | 0.58170765  | 0.795930992 |
| ENSMUSG00000034083 | Ccdc174    | -0.048893252 | 0.582176666 | 0.796258632 |
| ENSMUSG00000039787 | Cercam     | -0.045833995 | 0.582209234 | 0.796258632 |
| ENSMUSG00000074063 | Osgin1     | -0.019457096 | 0.582037241 | 0.796258632 |
| ENSMUSG00000091775 | Gm16494    | 0.034316696  | 0.582142963 | 0.796258632 |
| ENSMUSG00000034801 | Sos2       | -0.035622968 | 0.582342447 | 0.796353135 |
| ENSMUSG00000020780 | Srp68      | 0.041298919  | 0.582410183 | 0.796358089 |
| ENSMUSG00000006699 | Cdc42      | 0.038926945  | 0.58293062  | 0.796894258 |
| ENSMUSG00000032411 | Tfdp2      | 0.047619527  | 0.582919204 | 0.796894258 |
| ENSMUSG00000056888 | Glipr1     | -0.047096643 | 0.583275833 | 0.797278433 |
| ENSMUSG00000053091 | Lins1      | 0.047395934  | 0.583350309 | 0.797292494 |
| ENSMUSG00000040253 | Gbp7       | -0.048577335 | 0.583450859 | 0.797342185 |
| ENSMUSG00000115463 | Gm49356    | 0.046394226  | 0.583541878 | 0.797378842 |
| ENSMUSG00000029148 | Nrbp1      | -0.044193192 | 0.583887278 | 0.797763049 |
| ENSMUSG00000007646 | Rad51c     | -0.047663136 | 0.584203046 | 0.797872037 |
| ENSMUSG00000024378 | Stard4     | 0.049010798  | 0.584226343 | 0.797872037 |
| ENSMUSG00000028099 | Polr3c     | 0.046769555  | 0.584088138 | 0.797872037 |
| ENSMUSG00000029681 | Bcl7b      | -0.048496143 | 0.584108362 | 0.797872037 |
| ENSMUSG00000036892 | Prodh2     | -0.040382826 | 0.584288225 | 0.797872037 |
| ENSMUSG00000024889 | Rce1       | 0.047303851  | 0.58448703  | 0.797968058 |
| ENSMUSG00000028884 | Rpa2       | 0.047854064  | 0.584434833 | 0.797968058 |
| ENSMUSG00000026276 | Sept2      | -0.033924641 | 0.58471514  | 0.798033979 |
| ENSMUSG00000026341 | Actr3      | -0.042252068 | 0.58479231  | 0.798033979 |
| ENSMUSG00000037012 | Hk1        | -0.044422803 | 0.58474858  | 0.798033979 |
| ENSMUSG00000089782 | Gm3531     | 0.026610973  | 0.584751418 | 0.798033979 |
| ENSMUSG00000020869 | Lrrc59     | 0.046726137  | 0.584936017 | 0.798142399 |
| ENSMUSG00000032116 | Stt3a      | -0.044837212 | 0.585030681 | 0.798183886 |
| ENSMUSG00000020776 | Fbf1       | -0.033926179 | 0.585142348 | 0.798199573 |
| ENSMUSG00000040234 | Tm7sf3     | -0.044140138 | 0.585170703 | 0.798199573 |
| ENSMUSG00000008348 | Ubc        | -0.046987879 | 0.585883026 | 0.798895771 |
| ENSMUSG00000009687 | Fxyd5      | -0.04638725  | 0.586041287 | 0.798895771 |
| ENSMUSG00000024165 | Jpt2       | -0.045618149 | 0.586013934 | 0.798895771 |
| ENSMUSG00000025745 | Hadha      | -0.047606886 | 0.5858565   | 0.798895771 |
| ENSMUSG00000031877 | Ces2g      | -0.032880174 | 0.586144782 | 0.798895771 |
| ENSMUSG00000041684 | Bivm       | -0.03433481  | 0.586244134 | 0.798895771 |
| ENSMUSG00000055305 | Zfp93      | -0.024549529 | 0.586259959 | 0.798895771 |
| ENSMUSG00000081911 | Mrps36-ps2 | 0.047124858  | 0.586178383 | 0.798895771 |
| ENSMUSG00000082192 | Gm14719    | -0.046050638 | 0.585817824 | 0.798895771 |

|                    |          |              |             |             |
|--------------------|----------|--------------|-------------|-------------|
| ENSMUSG00000048895 | Cdk5r1   | -0.034564767 | 0.586394421 | 0.798904587 |
| ENSMUSG00000082938 | Gm2810   | -0.006581119 | 0.586395066 | 0.798904587 |
| ENSMUSG00000009772 | Nuak2    | -0.047840054 | 0.586667527 | 0.799166818 |
| ENSMUSG00000035242 | Oaz1     | 0.044061674  | 0.586716224 | 0.799166818 |
| ENSMUSG00000019849 | Prep     | 0.048398604  | 0.587291634 | 0.799599846 |
| ENSMUSG00000026578 | Ccdc181  | 0.048186318  | 0.587255221 | 0.799599846 |
| ENSMUSG00000027193 | Api5     | -0.044237414 | 0.587252877 | 0.799599846 |
| ENSMUSG00000039168 | Dap      | -0.038495675 | 0.587230835 | 0.799599846 |
| ENSMUSG00000038607 | Gng10    | 0.047082617  | 0.587358734 | 0.799603555 |
| ENSMUSG00000028243 | Ubxn2b   | -0.048146471 | 0.587479837 | 0.799680773 |
| ENSMUSG00000060470 | Adgrg3   | -0.042210873 | 0.587764116 | 0.799980066 |
| ENSMUSG00000036196 | Slc26a8  | -0.023911739 | 0.588313033 | 0.800639442 |
| ENSMUSG00000026577 | Blzf1    | -0.048107342 | 0.588525719 | 0.800841144 |
| ENSMUSG00000064351 | mt-Co1   | -0.042506665 | 0.588619423 | 0.800880913 |
| ENSMUSG00000001630 | Stk38l   | 0.0457913    | 0.588805268 | 0.801046028 |
| ENSMUSG00000038256 | Bcl9     | -0.040551503 | 0.589148498 | 0.8014252   |
| ENSMUSG00000032556 | Bfsp2    | -0.032801977 | 0.589226591 | 0.801443659 |
| ENSMUSG00000041241 | Mul1     | -0.047661634 | 0.589325892 | 0.801490956 |
| ENSMUSG00000025880 | Smad7    | -0.035270628 | 0.589427116 | 0.801540859 |
| ENSMUSG00000021608 | Lpcat1   | -0.04629246  | 0.589564051 | 0.801551563 |
| ENSMUSG00000094437 | Gm9830   | 0.04626293   | 0.589547993 | 0.801551563 |
| ENSMUSG00000031161 | Hdac6    | -0.039334436 | 0.58985526  | 0.801859711 |
| ENSMUSG00000021752 | Kctd6    | 0.047101499  | 0.589967777 | 0.801905435 |
| ENSMUSG00000049439 | Cyp20a1  | -0.043155845 | 0.590018015 | 0.801905435 |
| ENSMUSG00000050989 | Selenon  | -0.043958443 | 0.590142585 | 0.801986986 |
| ENSMUSG00000024778 | Fas      | 0.04380566   | 0.590210242 | 0.801991184 |
| ENSMUSG00000033721 | Vav3     | -0.04743366  | 0.590685662 | 0.802549399 |
| ENSMUSG00000019432 | Ddx39b   | -0.047043032 | 0.591717242 | 0.80386305  |
| ENSMUSG00000046671 | Mtfr1l   | -0.045781803 | 0.591854935 | 0.803962178 |
| ENSMUSG00000022228 | Zscan26  | -0.038307348 | 0.592037633 | 0.804122409 |
| ENSMUSG00000038291 | Snx25    | -0.035661065 | 0.592117918 | 0.804143523 |
| ENSMUSG00000031490 | Eif4ebp1 | 0.046933468  | 0.592306682 | 0.804277943 |
| ENSMUSG00000040865 | Ino80d   | -0.047570815 | 0.592346399 | 0.804277943 |
| ENSMUSG00000018166 | ErbB3    | -0.036726773 | 0.592723136 | 0.804497771 |
| ENSMUSG00000027173 | Depdc7   | -0.047459697 | 0.592896916 | 0.804497771 |
| ENSMUSG00000034883 | Lrr1     | -0.046159576 | 0.592698084 | 0.804497771 |
| ENSMUSG00000058240 | Cryzl1   | -0.045228878 | 0.592781635 | 0.804497771 |
| ENSMUSG00000069808 | Fam57a   | 0.045464277  | 0.59285273  | 0.804497771 |
| ENSMUSG00000106819 | Gm43498  | 0.019651856  | 0.59276346  | 0.804497771 |
| ENSMUSG00000041235 | Chd7     | 0.043546528  | 0.593010432 | 0.804563907 |
| ENSMUSG00000021786 | Oxsm     | 0.045343733  | 0.593532722 | 0.804978148 |
| ENSMUSG00000032245 | Cln6     | -0.047024018 | 0.59363979  | 0.804978148 |
| ENSMUSG00000042938 | Gm14117  | -0.045115123 | 0.593600608 | 0.804978148 |

|                    |           |              |             |             |
|--------------------|-----------|--------------|-------------|-------------|
| ENSMUSG00000058298 | Mcm9      | 0.043478954  | 0.593500951 | 0.804978148 |
| ENSMUSG00000099902 | Gm12115   | 0.020894906  | 0.593562851 | 0.804978148 |
| ENSMUSG00000051397 | Tacstd2   | 0.044469828  | 0.593768032 | 0.804997115 |
| ENSMUSG00000054342 | Kcnn4     | -0.049938932 | 0.593783396 | 0.804997115 |
| ENSMUSG00000028944 | Prkag2    | 0.036155879  | 0.593929475 | 0.805019425 |
| ENSMUSG00000069379 | Gm4950    | 0.02804705   | 0.593898618 | 0.805019425 |
| ENSMUSG00000057147 | Dph6      | 0.047486678  | 0.594197792 | 0.805295229 |
| ENSMUSG00000112368 | Gm49376   | 0.045285037  | 0.594288326 | 0.805330056 |
| ENSMUSG00000026021 | Sumo1     | 0.048376522  | 0.594554275 | 0.805464006 |
| ENSMUSG00000026088 | Mitd1     | 0.045641801  | 0.594454346 | 0.805464006 |
| ENSMUSG00000038069 | Cdkn2aip  | -0.045493183 | 0.594581714 | 0.805464006 |
| ENSMUSG00000021275 | Tecpr2    | 0.025882148  | 0.594780772 | 0.80555795  |
| ENSMUSG00000044150 | Bclaf3    | -0.047040976 | 0.594776909 | 0.80555795  |
| ENSMUSG00000090935 | Synj2bp   | -0.046828526 | 0.595129788 | 0.805942772 |
| ENSMUSG00000029434 | Vps33a    | 0.045526742  | 0.595389875 | 0.80620709  |
| ENSMUSG00000045410 | Akr1e1    | -0.045990958 | 0.59561217  | 0.806420184 |
| ENSMUSG00000053559 | Smagp     | 0.025361127  | 0.595682212 | 0.806427112 |
| ENSMUSG00000039840 | Epg5      | -0.040541637 | 0.595956187 | 0.806710091 |
| ENSMUSG00000019188 | H13       | -0.040774966 | 0.59607077  | 0.806777273 |
| ENSMUSG00000020817 | Rabep1    | -0.046304138 | 0.596211164 | 0.806791466 |
| ENSMUSG00000036678 | Aaas      | 0.041440093  | 0.596194429 | 0.806791466 |
| ENSMUSG00000060205 | Olfr57    | -0.037202587 | 0.596385746 | 0.806939799 |
| ENSMUSG00000040029 | lpo8      | 0.043492174  | 0.596712156 | 0.807293507 |
| ENSMUSG00000103584 | Gm38053   | 0.025907703  | 0.597118253 | 0.807754936 |
| ENSMUSG00000034898 | Filip1    | 0.03174273   | 0.597375702 | 0.807839259 |
| ENSMUSG00000035397 | Klf16     | -0.026433334 | 0.597345244 | 0.807839259 |
| ENSMUSG00000044788 | Fads6     | 0.030875597  | 0.59734175  | 0.807839259 |
| ENSMUSG00000052299 | Ltn1      | -0.045456907 | 0.597578888 | 0.808026058 |
| ENSMUSG00000024079 | Eif2ak2   | 0.043246546  | 0.597843418 | 0.808160904 |
| ENSMUSG00000044469 | Tnfaip8l1 | 0.046411176  | 0.597906684 | 0.808160904 |
| ENSMUSG00000048620 | Olfr1336  | 0.030670793  | 0.597775373 | 0.808160904 |
| ENSMUSG00000050973 | Gdpgp1    | -0.04697269  | 0.59795606  | 0.808160904 |
| ENSMUSG00000052712 | BC004004  | 0.046519948  | 0.598003934 | 0.808160904 |
| ENSMUSG00000083563 | Gm13340   | -0.025784777 | 0.598103627 | 0.808207698 |
| ENSMUSG00000031497 | Tnfsf13b  | -0.035531757 | 0.598474811 | 0.808621301 |
| ENSMUSG00000116074 | Gm49491   | -0.040971824 | 0.598666163 | 0.808791865 |
| ENSMUSG00000028538 | St3gal3   | -0.036412535 | 0.598886033 | 0.809000915 |
| ENSMUSG00000074925 | Ptar1     | 0.043488199  | 0.5991381   | 0.809253407 |
| ENSMUSG00000006932 | Ctnnb1    | 0.046815566  | 0.599348987 | 0.80945023  |
| ENSMUSG00000055239 | Kcmf1     | -0.045397635 | 0.599799076 | 0.809970029 |
| ENSMUSG00000093701 | Gm21970   | -0.04499495  | 0.600186821 | 0.810405534 |
| ENSMUSG00000075269 | Bex6      | -0.046003106 | 0.600271455 | 0.810431711 |
| ENSMUSG00000029767 | Calu      | 0.040476565  | 0.600383107 | 0.810494357 |

|                    |          |              |             |             |
|--------------------|----------|--------------|-------------|-------------|
| ENSMUSG00000029202 | Pds5a    | 0.040504068  | 0.600829529 | 0.810920741 |
| ENSMUSG00000082895 | Rpsa-ps9 | 0.022718396  | 0.600784129 | 0.810920741 |
| ENSMUSG00000026335 | Pam      | 0.044089125  | 0.600920666 | 0.810955627 |
| ENSMUSG00000044966 | Fbxo48   | -0.033018937 | 0.601342034 | 0.811436111 |
| ENSMUSG00000019984 | Med23    | -0.037335271 | 0.601431189 | 0.81146826  |
| ENSMUSG00000095101 | Gm13285  | -0.030721275 | 0.601657891 | 0.811685963 |
| ENSMUSG00000032939 | Nup93    | -0.04600621  | 0.601781783 | 0.811764935 |
| ENSMUSG00000038695 | Josd2    | 0.039658545  | 0.601955671 | 0.811911325 |
| ENSMUSG0000002332  | Dhrs1    | -0.044901258 | 0.602230378 | 0.812172212 |
| ENSMUSG00000021684 | Pde8b    | 0.0331264    | 0.602311616 | 0.812172212 |
| ENSMUSG00000027655 | Dhx35    | 0.040920936  | 0.602410642 | 0.812172212 |
| ENSMUSG00000053175 | Bcl3     | 0.045727931  | 0.602405433 | 0.812172212 |
| ENSMUSG00000083380 | Ndufb4c  | 0.044052234  | 0.602588303 | 0.812323563 |
| ENSMUSG00000031371 | Haus7    | 0.04666503   | 0.602961001 | 0.812561418 |
| ENSMUSG00000032298 | Neil1    | -0.042821359 | 0.602928636 | 0.812561418 |
| ENSMUSG00000078616 | Trim30c  | 0.025730281  | 0.60292074  | 0.812561418 |
| ENSMUSG00000034311 | Kif4     | -0.04601955  | 0.603049262 | 0.812568426 |
| ENSMUSG00000059089 | Fcgr4    | -0.042158866 | 0.603097039 | 0.812568426 |
| ENSMUSG00000026317 | Cln8     | -0.045706064 | 0.60320726  | 0.812628783 |
| ENSMUSG00000032393 | Dpp8     | 0.044650068  | 0.603389832 | 0.812786585 |
| ENSMUSG00000039307 | Hexdc    | 0.045042905  | 0.603548396 | 0.812892899 |
| ENSMUSG00000066613 | Zfp932   | -0.044404914 | 0.603599647 | 0.812892899 |
| ENSMUSG00000016087 | Fli1     | -0.043361724 | 0.603924868 | 0.812998583 |
| ENSMUSG00000024644 | Cndp2    | -0.045037002 | 0.603939934 | 0.812998583 |
| ENSMUSG00000037822 | Smim14   | 0.045046425  | 0.603936841 | 0.812998583 |
| ENSMUSG00000054894 | Atp5s    | 0.044916914  | 0.603876795 | 0.812998583 |
| ENSMUSG00000046667 | Rbm12b1  | 0.036177703  | 0.604119369 | 0.813152003 |
| ENSMUSG00000004843 | Chmp2b   | -0.041217472 | 0.604698727 | 0.813667304 |
| ENSMUSG00000020191 | Spata48  | -0.025506283 | 0.604583575 | 0.813667304 |
| ENSMUSG00000047193 | Dync2h1  | -0.041309854 | 0.6046664   | 0.813667304 |
| ENSMUSG00000033486 | Catsper2 | -0.034435189 | 0.604959644 | 0.813873945 |
| ENSMUSG00000078651 | Aoc2     | 0.021060672  | 0.604983345 | 0.813873945 |
| ENSMUSG00000049516 | Spty2d1  | -0.04337284  | 0.60532448  | 0.814154373 |
| ENSMUSG00000062382 | Ftl1-ps1 | -0.045145629 | 0.605280783 | 0.814154373 |
| ENSMUSG00000099019 | Gm27254  | 0.030462719  | 0.605388438 | 0.814154373 |
| ENSMUSG00000028672 | Hmgcl    | 0.046256208  | 0.605552565 | 0.814286934 |
| ENSMUSG00000028896 | Rcc1     | 0.046049305  | 0.60578998  | 0.814459276 |
| ENSMUSG00000089768 | Tmsb15b1 | 0.041774325  | 0.605811871 | 0.814459276 |
| ENSMUSG00000001285 | Myg1     | 0.043115453  | 0.606193715 | 0.814511102 |
| ENSMUSG00000019961 | Tmpo     | -0.0431989   | 0.606333451 | 0.814511102 |
| ENSMUSG00000032590 | Apeh     | 0.046271467  | 0.60618208  | 0.814511102 |
| ENSMUSG00000039230 | Tbcd     | -0.043996077 | 0.606265978 | 0.814511102 |
| ENSMUSG00000063663 | Brwd3    | 0.034293754  | 0.606195071 | 0.814511102 |

|                    |               |              |             |             |
|--------------------|---------------|--------------|-------------|-------------|
| ENSMUSG00000063801 | Ap3s2         | -0.045379857 | 0.606338397 | 0.814511102 |
| ENSMUSG00000070814 | Zswim9        | -0.031404885 | 0.606375023 | 0.814511102 |
| ENSMUSG00000072501 | Phf20l1       | -0.040754267 | 0.606280198 | 0.814511102 |
| ENSMUSG00000062232 | Rapgef2       | -0.036851416 | 0.606567904 | 0.814682086 |
| ENSMUSG00000025986 | Slc39a10      | 0.043910046  | 0.60689754  | 0.814794987 |
| ENSMUSG00000027272 | Ubr1          | -0.043794896 | 0.606998497 | 0.814794987 |
| ENSMUSG00000029047 | Pex10         | 0.045891048  | 0.607045553 | 0.814794987 |
| ENSMUSG00000037349 | Nudt22        | -0.043169315 | 0.607024182 | 0.814794987 |
| ENSMUSG00000057842 | Zfp595        | -0.026241234 | 0.607016947 | 0.814794987 |
| ENSMUSG00000089684 | Gm14163       | 0.033222253  | 0.606938067 | 0.814794987 |
| ENSMUSG00000021377 | Dek           | -0.045707575 | 0.6072943   | 0.814866329 |
| ENSMUSG00000023961 | Enpp4         | 0.044995297  | 0.607295516 | 0.814866329 |
| ENSMUSG00000073791 | Efcab7        | 0.035932778  | 0.607192037 | 0.814866329 |
| ENSMUSG00000039130 | Zc3hc1        | -0.045896459 | 0.60738144  | 0.814893591 |
| ENSMUSG00000070815 | Vmn1r87       | -0.029414247 | 0.607574473 | 0.815064535 |
| ENSMUSG00000070002 | Ell           | -0.035428768 | 0.607875007 | 0.815379639 |
| ENSMUSG00000024164 | C3            | 0.040467517  | 0.607956085 | 0.815400339 |
| ENSMUSG00000026305 | Lrrfip1       | -0.044720266 | 0.608108888 | 0.815438023 |
| ENSMUSG00000071068 | Trem12        | 0.041736839  | 0.608115482 | 0.815438023 |
| ENSMUSG00000038619 | Ensa          | -0.043631253 | 0.608368996 | 0.815689907 |
| ENSMUSG00000020640 | Itsn2         | -0.043979279 | 0.608483855 | 0.815755851 |
| ENSMUSG00000106631 | Gm42669       | 0.034771309  | 0.608561141 | 0.815771415 |
| ENSMUSG00000022092 | Ppp3cc        | 0.03504205   | 0.608655957 | 0.815810471 |
| ENSMUSG00000114676 | Gm47678       | -0.026282804 | 0.608882192 | 0.816025648 |
| ENSMUSG00000040591 | 1110051M20Rik | -0.044287369 | 0.609131408 | 0.816271575 |
| ENSMUSG00000015437 | Gzmb          | -0.022166622 | 0.609319968 | 0.81634811  |
| ENSMUSG00000026499 | Acbd3         | 0.04582694   | 0.609317002 | 0.81634811  |
| ENSMUSG00000074340 | Ovgp1         | 0.026671721  | 0.60949333  | 0.816492306 |
| ENSMUSG00000028910 | Mecr          | 0.045617078  | 0.609624796 | 0.81658035  |
| ENSMUSG00000020275 | Rel           | 0.037205925  | 0.609837198 | 0.816688716 |
| ENSMUSG00000078894 | 2210418O10Rik | 0.035553425  | 0.609783843 | 0.816688716 |
| ENSMUSG00000028969 | Cdk5          | -0.043845009 | 0.610174878 | 0.817052841 |
| ENSMUSG00000009013 | Dynll1        | 0.044977794  | 0.610292619 | 0.817122412 |
| ENSMUSG00000036743 | Psmas8        | -0.044722193 | 0.610843231 | 0.817670834 |
| ENSMUSG00000063317 | Usp31         | 0.021471319  | 0.610849095 | 0.817670834 |
| ENSMUSG00000069830 | Nlrp1a        | -0.042039476 | 0.610899713 | 0.817670834 |
| ENSMUSG00000091512 | Lamtor3       | -0.043164191 | 0.611008872 | 0.817728822 |
| ENSMUSG00000015087 | Rabl6         | -0.043580142 | 0.611787786 | 0.81779638  |
| ENSMUSG00000018347 | Zkscan6       | -0.044933669 | 0.611690659 | 0.81779638  |
| ENSMUSG00000020160 | Meis1         | 0.033265255  | 0.612206763 | 0.81779638  |
| ENSMUSG00000020305 | Asb3          | -0.047117113 | 0.612016652 | 0.81779638  |
| ENSMUSG00000020669 | Sh3yl1        | -0.036074986 | 0.612214124 | 0.81779638  |
| ENSMUSG00000020770 | Unk           | -0.041653415 | 0.611808788 | 0.81779638  |

|                    |             |              |             |             |
|--------------------|-------------|--------------|-------------|-------------|
| ENSMUSG00000021615 | Xrcc4       | -0.044714752 | 0.612118802 | 0.81779638  |
| ENSMUSG00000025144 | Cenpx       | 0.040430356  | 0.611227947 | 0.81779638  |
| ENSMUSG00000025486 | Sirt3       | -0.044042369 | 0.611582498 | 0.81779638  |
| ENSMUSG00000025956 | Mettl21a    | -0.044286656 | 0.611251788 | 0.81779638  |
| ENSMUSG00000026878 | Rab14       | 0.044188114  | 0.611520816 | 0.81779638  |
| ENSMUSG00000027889 | Ampd2       | -0.044292842 | 0.611273103 | 0.81779638  |
| ENSMUSG00000037242 | Clic4       | -0.042826682 | 0.611452459 | 0.81779638  |
| ENSMUSG00000043336 | Filip1l     | -0.038772643 | 0.612095587 | 0.81779638  |
| ENSMUSG00000053898 | Ech1        | 0.041198053  | 0.612244468 | 0.81779638  |
| ENSMUSG00000064370 | mt-Cytb     | -0.036961967 | 0.612155449 | 0.81779638  |
| ENSMUSG00000081049 | Rps24-ps3   | 0.019278835  | 0.611517876 | 0.81779638  |
| ENSMUSG00000108249 | Gm43960     | -0.044932211 | 0.612172581 | 0.81779638  |
| ENSMUSG00000026987 | Baz2b       | -0.045142091 | 0.612468054 | 0.818007065 |
| ENSMUSG00000099927 | Gm8226      | 0.008209829  | 0.612538944 | 0.818013786 |
| ENSMUSG00000002010 | ldh3g       | 0.034098831  | 0.613229886 | 0.818197922 |
| ENSMUSG00000006740 | Kif5b       | -0.047749736 | 0.613008483 | 0.818197922 |
| ENSMUSG00000017478 | Zc3h18      | 0.043639775  | 0.613044261 | 0.818197922 |
| ENSMUSG00000022241 | Tars        | 0.043161236  | 0.613057988 | 0.818197922 |
| ENSMUSG00000024974 | Smc3        | 0.041653922  | 0.613137689 | 0.818197922 |
| ENSMUSG00000029250 | Polr2b      | -0.04391442  | 0.612781241 | 0.818197922 |
| ENSMUSG00000039756 | Dnttip2     | 0.044833829  | 0.613335549 | 0.818197922 |
| ENSMUSG00000059142 | Zfp945      | 0.044282592  | 0.612938556 | 0.818197922 |
| ENSMUSG00000070305 | Mpzl3       | 0.016273502  | 0.613300762 | 0.818197922 |
| ENSMUSG00000075376 | Rc3h2       | -0.033519583 | 0.613312383 | 0.818197922 |
| ENSMUSG00000016510 | Mtif3       | -0.042521587 | 0.613626722 | 0.818498444 |
| ENSMUSG00000062981 | Mrpl42      | 0.044806101  | 0.6138346   | 0.818599911 |
| ENSMUSG00000067085 | Gm10197     | -0.041637652 | 0.613785849 | 0.818599911 |
| ENSMUSG00000045392 | Olfr1033    | -0.028202307 | 0.61403078  | 0.818685736 |
| ENSMUSG00000045854 | Lym2        | 0.041461947  | 0.613998223 | 0.818685736 |
| ENSMUSG00000037606 | Osbpl5      | -0.023652849 | 0.614175082 | 0.818790242 |
| ENSMUSG00000021302 | Ggps1       | 0.044870541  | 0.614418226 | 0.818965904 |
| ENSMUSG00000094810 | Olfr907     | -0.033697968 | 0.614438714 | 0.818965904 |
| ENSMUSG00000044768 | D1Erttd622e | 0.045154859  | 0.614565957 | 0.819047612 |
| ENSMUSG00000016028 | Celsr1      | 0.022847294  | 0.614698847 | 0.819048957 |
| ENSMUSG00000020549 | Elac2       | 0.044862187  | 0.614664062 | 0.819048957 |
| ENSMUSG00000056952 | Tatdn2      | 0.029549409  | 0.61485234  | 0.819165603 |
| ENSMUSG00000030340 | Scnn1a      | -0.042572442 | 0.614949458 | 0.819207123 |
| ENSMUSG00000017418 | Arl5b       | -0.035102067 | 0.615372351 | 0.81968257  |
| ENSMUSG00000030091 | Nup210      | 0.043531794  | 0.615685489 | 0.819750638 |
| ENSMUSG00000030589 | Rasgrp4     | -0.018923387 | 0.615607339 | 0.819750638 |
| ENSMUSG00000040097 | Flywch1     | -0.043809217 | 0.615687441 | 0.819750638 |
| ENSMUSG00000040620 | Dhx33       | -0.042612202 | 0.61557871  | 0.819750638 |
| ENSMUSG00000025898 | Cwf19l2     | 0.044968222  | 0.615999297 | 0.819990062 |

|                    |               |              |             |             |
|--------------------|---------------|--------------|-------------|-------------|
| ENSMUSG00000116329 | LT629151.6    | 0.004227262  | 0.615940444 | 0.819990062 |
| ENSMUSG00000068523 | Gng5          | 0.038979356  | 0.616421715 | 0.820464436 |
| ENSMUSG00000054051 | Erc6          | 0.02917531   | 0.616957373 | 0.821089417 |
| ENSMUSG00000064210 | Ano6          | -0.041068177 | 0.617065059 | 0.82114475  |
| ENSMUSG00000041992 | Rapgef5       | 0.02723756   | 0.617248681 | 0.821301111 |
| ENSMUSG00000021038 | Vipas39       | 0.041871115  | 0.617944175 | 0.822138453 |
| ENSMUSG00000032698 | Lmo2          | -0.043872993 | 0.618064012 | 0.822209821 |
| ENSMUSG00000047213 | Ythdf3        | -0.041821818 | 0.618372658 | 0.822532318 |
| ENSMUSG00000028953 | Abcf2         | 0.041871734  | 0.618508704 | 0.82253711  |
| ENSMUSG00000029657 | Hsph1         | -0.043218078 | 0.618499394 | 0.82253711  |
| ENSMUSG00000006369 | Fbln1         | -0.018608126 | 0.619017279 | 0.82267348  |
| ENSMUSG00000008475 | Arpc5         | -0.043988813 | 0.619100199 | 0.82267348  |
| ENSMUSG00000015970 | Chdh          | 0.041561479  | 0.619143055 | 0.82267348  |
| ENSMUSG00000021432 | Slc35b3       | -0.042329954 | 0.619192794 | 0.82267348  |
| ENSMUSG00000028618 | Tmem59        | -0.04539226  | 0.619137291 | 0.82267348  |
| ENSMUSG00000031059 | Ndufb11       | 0.042064213  | 0.619143492 | 0.82267348  |
| ENSMUSG00000056763 | Cspp1         | -0.043683377 | 0.619122957 | 0.82267348  |
| ENSMUSG00000070883 | Ccdc173       | -0.035151727 | 0.619200743 | 0.82267348  |
| ENSMUSG00000097412 | 1810014B01Rik | -0.044086166 | 0.619207339 | 0.82267348  |
| ENSMUSG00000026142 | Rhbdd1        | -0.042236083 | 0.61950013  | 0.822974451 |
| ENSMUSG00000049717 | Lig4          | -0.023495279 | 0.619658493 | 0.823096796 |
| ENSMUSG00000024231 | Cul2          | -0.043758674 | 0.620267596 | 0.823665278 |
| ENSMUSG00000029428 | Stx2          | -0.043893336 | 0.620272992 | 0.823665278 |
| ENSMUSG00000049300 | Prmt6         | 0.043124095  | 0.620285405 | 0.823665278 |
| ENSMUSG00000034206 | Polq          | 0.035129572  | 0.620406215 | 0.823737637 |
| ENSMUSG00000059994 | Fcrl1         | -0.029021681 | 0.620886727 | 0.82428752  |
| ENSMUSG00000031133 | Arhgef6       | -0.043833457 | 0.62096972  | 0.824309596 |
| ENSMUSG00000086784 | Isoc2a        | -0.024763441 | 0.621403131 | 0.824796783 |
| ENSMUSG00000028614 | Ndc1          | -0.043558011 | 0.621682534 | 0.824943312 |
| ENSMUSG00000038876 | Rnf146        | -0.042458562 | 0.621754067 | 0.824943312 |
| ENSMUSG00000044148 | 1810030O07Rik | 0.041347025  | 0.621779188 | 0.824943312 |
| ENSMUSG00000053226 | Dand5         | -0.041002354 | 0.621648636 | 0.824943312 |
| ENSMUSG00000030603 | Psmc4         | 0.04252642   | 0.622114166 | 0.825163447 |
| ENSMUSG00000066760 | Psg16         | -0.038090889 | 0.622022125 | 0.825163447 |
| ENSMUSG00000089682 | Bcl2l2        | -0.028993833 | 0.622144407 | 0.825163447 |
| ENSMUSG00000037533 | Rapgef6       | -0.042509341 | 0.622221607 | 0.825177726 |
| ENSMUSG00000001420 | Tmem79        | -0.032144462 | 0.622608646 | 0.825309268 |
| ENSMUSG00000008307 | 1700109H08Rik | -0.028374149 | 0.622549579 | 0.825309268 |
| ENSMUSG00000044986 | Tst           | 0.039735429  | 0.622653019 | 0.825309268 |
| ENSMUSG00000060802 | B2m           | -0.04411277  | 0.622525838 | 0.825309268 |
| ENSMUSG00000090394 | 4930523C07Rik | -0.03855919  | 0.622548462 | 0.825309268 |
| ENSMUSG00000048756 | Foxo3         | 0.040759487  | 0.622720592 | 0.825310763 |
| ENSMUSG00000041702 | Btbd7         | -0.043570742 | 0.622822319 | 0.825357518 |

|                    |               |              |             |             |
|--------------------|---------------|--------------|-------------|-------------|
| ENSMUSG00000114096 | Gm48641       | 0.030455837  | 0.623052974 | 0.825575101 |
| ENSMUSG00000022009 | Nufip1        | 0.038731095  | 0.62365251  | 0.825752886 |
| ENSMUSG00000025420 | Katnal2       | -0.022012271 | 0.623506924 | 0.825752886 |
| ENSMUSG00000026388 | 3110009E18Rik | 0.043761206  | 0.62355356  | 0.825752886 |
| ENSMUSG00000032305 | Fam219b       | -0.042606778 | 0.623638077 | 0.825752886 |
| ENSMUSG00000038046 | Mrm3          | 0.043833596  | 0.623497394 | 0.825752886 |
| ENSMUSG00000071547 | Nt5dc2        | 0.044038178  | 0.623313741 | 0.825752886 |
| ENSMUSG00000117114 | AC166058.1    | -0.03328155  | 0.623329958 | 0.825752886 |
| ENSMUSG00000034135 | Sik3          | -0.034426943 | 0.623900269 | 0.825992884 |
| ENSMUSG00000031072 | LTO1          | -0.040710443 | 0.624203677 | 0.826246805 |
| ENSMUSG00000103367 | Gm38158       | -0.037175117 | 0.624225104 | 0.826246805 |
| ENSMUSG00000003346 | Abhd17a       | 0.037382534  | 0.624574799 | 0.826621586 |
| ENSMUSG00000041560 | Nop53         | 0.039941902  | 0.624644752 | 0.826626088 |
| ENSMUSG00000026510 | Trp53bp2      | -0.026576573 | 0.624979969 | 0.826728147 |
| ENSMUSG00000040231 | Syngn4        | -0.027434664 | 0.624910046 | 0.826728147 |
| ENSMUSG00000045312 | Lhfpl2        | -0.029603829 | 0.624988109 | 0.826728147 |
| ENSMUSG00000082530 | Gm12168       | 0.042189282  | 0.624851196 | 0.826728147 |
| ENSMUSG00000018334 | Ksr1          | -0.018358184 | 0.625161453 | 0.826869387 |
| ENSMUSG00000111743 | Gm48856       | -0.042370821 | 0.625460144 | 0.827176369 |
| ENSMUSG00000075595 | Zfp652        | 0.043665595  | 0.625547938 | 0.8272044   |
| ENSMUSG00000024327 | Slc39a7       | -0.042301458 | 0.625926168 | 0.827466656 |
| ENSMUSG00000039191 | Rbpj          | 0.04317475   | 0.625920371 | 0.827466656 |
| ENSMUSG00000098374 | Gm28043       | -0.036996546 | 0.625946116 | 0.827466656 |
| ENSMUSG00000041915 | Ammecr1l      | -0.040786527 | 0.626113175 | 0.827560657 |
| ENSMUSG00000083179 | Gm12693       | 0.042702311  | 0.626150475 | 0.827560657 |
| ENSMUSG00000026730 | Pter          | 0.043566542  | 0.626421662 | 0.827600743 |
| ENSMUSG00000036067 | Slc2a6        | -0.036031899 | 0.626280619 | 0.827600743 |
| ENSMUSG00000038351 | Sgsm2         | -0.032712433 | 0.626447322 | 0.827600743 |
| ENSMUSG00000040006 | Ginm1         | -0.042806981 | 0.626314836 | 0.827600743 |
| ENSMUSG00000026797 | Stxbp1        | -0.022978111 | 0.626818069 | 0.827914423 |
| ENSMUSG00000053110 | Yap1          | -0.026911561 | 0.626803652 | 0.827914423 |
| ENSMUSG00000036158 | Prickle1      | -0.024091995 | 0.627043402 | 0.828062026 |
| ENSMUSG00000071632 | 2510002D24Rik | 0.043433496  | 0.627063153 | 0.828062026 |
| ENSMUSG00000026504 | Sdccag8       | -0.041856532 | 0.627237581 | 0.828116283 |
| ENSMUSG00000041718 | Alg13         | 0.043023102  | 0.627175372 | 0.828116283 |
| ENSMUSG00000032349 | Elovl5        | 0.037945412  | 0.627363488 | 0.828194482 |
| ENSMUSG00000013150 | Gfod2         | -0.029526995 | 0.62779601  | 0.82867739  |
| ENSMUSG00000041058 | Wwp1          | 0.042427969  | 0.627998829 | 0.828857024 |
| ENSMUSG00000022332 | Khdrbs3       | -0.042694858 | 0.628150533 | 0.828881098 |
| ENSMUSG00000034292 | Traf3ip1      | 0.036064947  | 0.628111874 | 0.828881098 |
| ENSMUSG00000020143 | Dock2         | 0.043077755  | 0.628340855 | 0.828915437 |
| ENSMUSG00000022837 | lqcb1         | 0.038642179  | 0.628492898 | 0.828915437 |
| ENSMUSG00000033684 | Qsox1         | -0.039043142 | 0.628427647 | 0.828915437 |

|                    |          |              |             |             |
|--------------------|----------|--------------|-------------|-------------|
| ENSMUSG00000034593 | Myo5a    | 0.036848775  | 0.628293984 | 0.828915437 |
| ENSMUSG00000059518 | Znhit1   | 0.042240979  | 0.628510232 | 0.828915437 |
| ENSMUSG00000015083 | C8g      | -0.03541374  | 0.62860516  | 0.828927661 |
| ENSMUSG00000024384 | lws1     | 0.042457339  | 0.628737176 | 0.828927661 |
| ENSMUSG00000046541 | Zfp526   | -0.025374027 | 0.628786444 | 0.828927661 |
| ENSMUSG00000073724 | Pramel4  | -0.037735082 | 0.62869311  | 0.828927661 |
| ENSMUSG00000095990 | Zfp97    | -0.03852649  | 0.628939236 | 0.829041096 |
| ENSMUSG00000021357 | Exoc2    | -0.042559107 | 0.629011091 | 0.829047831 |
| ENSMUSG00000038838 | Vars2    | -0.035704095 | 0.629161181 | 0.829157669 |
| ENSMUSG00000002043 | Trappc6a | 0.043704119  | 0.6295226   | 0.829477053 |
| ENSMUSG00000040883 | Tmem205  | -0.040964531 | 0.629537089 | 0.829477053 |
| ENSMUSG00000025227 | Mfsd13a  | -0.042845571 | 0.630090567 | 0.829854197 |
| ENSMUSG00000027879 | Sec22b   | 0.038525714  | 0.630017874 | 0.829854197 |
| ENSMUSG00000029275 | Gfi1     | 0.042325149  | 0.630081301 | 0.829854197 |
| ENSMUSG00000032440 | Tgfbr2   | -0.027658543 | 0.629949153 | 0.829854197 |
| ENSMUSG00000026979 | Psd4     | -0.040737754 | 0.630260718 | 0.829990286 |
| ENSMUSG00000070939 | Tgfbrap1 | -0.038670378 | 0.630332602 | 0.829996952 |
| ENSMUSG00000043279 | Trim56   | 0.028353742  | 0.630433845 | 0.830042271 |
| ENSMUSG00000003190 | Bcl2l12  | -0.042625545 | 0.630696497 | 0.83021208  |
| ENSMUSG00000059363 | Fxn      | 0.043296123  | 0.630659764 | 0.83021208  |
| ENSMUSG00000033400 | Ag1      | -0.037507848 | 0.630880148 | 0.830306051 |
| ENSMUSG00000040943 | Tet2     | 0.042745977  | 0.630901579 | 0.830306051 |
| ENSMUSG00000050192 | Eif5a2   | 0.024416406  | 0.631020477 | 0.830374547 |
| ENSMUSG00000056076 | Eif3b    | 0.042938299  | 0.63118179  | 0.830498837 |
| ENSMUSG00000015568 | Lpl      | -0.042295338 | 0.631318577 | 0.830502865 |
| ENSMUSG00000026986 | Hnmt     | 0.041606698  | 0.631291929 | 0.830502865 |
| ENSMUSG00000107539 | Gm44790  | -0.009335122 | 0.631595279 | 0.83077888  |
| ENSMUSG00000039242 | B3galnt2 | -0.041446035 | 0.631716743 | 0.830850663 |
| ENSMUSG00000000168 | Dlat     | 0.041095558  | 0.631868986 | 0.830874939 |
| ENSMUSG00000055531 | Cpsf6    | 0.043379759  | 0.631848161 | 0.830874939 |
| ENSMUSG00000033184 | Tmed7    | 0.041301817  | 0.632028176 | 0.830996292 |
| ENSMUSG00000069633 | Pex11g   | 0.041812664  | 0.63218352  | 0.831112564 |
| ENSMUSG00000045538 | Ddx28    | 0.040390012  | 0.632366624 | 0.831265301 |
| ENSMUSG00000004530 | Coro1c   | -0.041360644 | 0.632612232 | 0.831500162 |
| ENSMUSG00000070354 | Evi2     | -0.039057324 | 0.632884485 | 0.831769991 |
| ENSMUSG00000021488 | Nsd1     | -0.036784303 | 0.633801706 | 0.832535004 |
| ENSMUSG00000021589 | Rhobtb3  | 0.030019689  | 0.633543247 | 0.832535004 |
| ENSMUSG00000024339 | Tap2     | -0.04198272  | 0.633689868 | 0.832535004 |
| ENSMUSG00000030061 | Uba3     | -0.041645038 | 0.63379994  | 0.832535004 |
| ENSMUSG00000052812 | Atad2b   | -0.04157766  | 0.63374106  | 0.832535004 |
| ENSMUSG00000028414 | Fktn     | -0.037939782 | 0.633902528 | 0.832544464 |
| ENSMUSG00000045980 | Tmem104  | -0.028008416 | 0.633942963 | 0.832544464 |
| ENSMUSG00000030068 | Gm20696  | -0.034681895 | 0.634015429 | 0.832551606 |

|                    |           |              |             |             |
|--------------------|-----------|--------------|-------------|-------------|
| ENSMUSG00000020743 | Mif4gd    | 0.042009809  | 0.634291527 | 0.832638347 |
| ENSMUSG00000024477 | Pggt1b    | -0.041974058 | 0.634349624 | 0.832638347 |
| ENSMUSG00000025161 | Slc16a3   | 0.040026295  | 0.634333452 | 0.832638347 |
| ENSMUSG00000038902 | Pogz      | 0.034501337  | 0.634182623 | 0.832638347 |
| ENSMUSG00000033703 | Fuk       | -0.037120727 | 0.634427834 | 0.832653014 |
| ENSMUSG00000020464 | Pnpt1     | -0.041325003 | 0.634996504 | 0.832875412 |
| ENSMUSG00000022031 | Elp3      | -0.040047577 | 0.634823573 | 0.832875412 |
| ENSMUSG00000028133 | Rwdd3     | 0.037577628  | 0.6349698   | 0.832875412 |
| ENSMUSG00000030127 | Cops7a    | 0.035348909  | 0.634991634 | 0.832875412 |
| ENSMUSG00000035578 | lqcg      | -0.030603894 | 0.634672609 | 0.832875412 |
| ENSMUSG00000046836 | Brox      | -0.039194972 | 0.63499961  | 0.832875412 |
| ENSMUSG00000022992 | Kansl2    | -0.041537412 | 0.63517617  | 0.833019028 |
| ENSMUSG00000012519 | Mkl       | -0.040158287 | 0.635513329 | 0.833076923 |
| ENSMUSG00000026958 | Dpp7      | 0.04164937   | 0.635386596 | 0.833076923 |
| ENSMUSG00000038372 | Gm5s      | 0.041413718  | 0.635555665 | 0.833076923 |
| ENSMUSG00000038954 | Supt3     | -0.041698363 | 0.63551161  | 0.833076923 |
| ENSMUSG00000089687 | Rab42     | -0.029499632 | 0.635503349 | 0.833076923 |
| ENSMUSG00000035051 | Dhx57     | 0.033586713  | 0.635679259 | 0.833151005 |
| ENSMUSG00000038482 | Tfdp1     | 0.041508522  | 0.635827552 | 0.833257441 |
| ENSMUSG00000031556 | Tm2d2     | 0.03729363   | 0.63613543  | 0.833485039 |
| ENSMUSG00000032018 | Sc5d      | 0.050787629  | 0.636109718 | 0.833485039 |
| ENSMUSG00000110867 | Gm7368    | -0.005643697 | 0.636224261 | 0.833513505 |
| ENSMUSG00000017639 | Rab11fip4 | 0.025628679  | 0.636299865 | 0.833524639 |
| ENSMUSG00000025269 | Apex2     | 0.040464716  | 0.636434864 | 0.833525669 |
| ENSMUSG00000039065 | Fam173b   | 0.0422951    | 0.636406202 | 0.833525669 |
| ENSMUSG00000022468 | Endou     | 0.02531953   | 0.636764651 | 0.833725203 |
| ENSMUSG00000026361 | Cdc73     | -0.039100141 | 0.636788584 | 0.833725203 |
| ENSMUSG00000039463 | Slc9a8    | 0.042057622  | 0.636746577 | 0.833725203 |
| ENSMUSG00000059586 | Nsmce2    | 0.04237081   | 0.637162472 | 0.834126799 |
| ENSMUSG00000001473 | Tubb6     | 0.040199694  | 0.637832277 | 0.834545584 |
| ENSMUSG00000021177 | Tdp1      | 0.040734909  | 0.637812086 | 0.834545584 |
| ENSMUSG00000024581 | Napg      | 0.041894024  | 0.637860957 | 0.834545584 |
| ENSMUSG00000028438 | Kif24     | 0.031545622  | 0.637788141 | 0.834545584 |
| ENSMUSG00000033557 | Fam20b    | 0.039683892  | 0.637885498 | 0.834545584 |
| ENSMUSG00000078185 | Chml      | 0.026713728  | 0.637743766 | 0.834545584 |
| ENSMUSG00000021113 | Snapc1    | -0.041033403 | 0.63827241  | 0.834787996 |
| ENSMUSG00000040506 | Ambra1    | -0.00992942  | 0.638266072 | 0.834787996 |
| ENSMUSG00000061099 | Gapdhs    | 0.028868106  | 0.638146877 | 0.834787996 |
| ENSMUSG00000075467 | Dnlz      | -0.041581417 | 0.638386558 | 0.834849382 |
| ENSMUSG00000028128 | F3        | -0.023242527 | 0.638494201 | 0.834902249 |
| ENSMUSG00000007613 | Tgfbr1    | 0.039064392  | 0.638902779 | 0.83534857  |
| ENSMUSG00000061242 | Gm9104    | 0.018519388  | 0.639066522 | 0.835474715 |
| ENSMUSG00000010554 | Mettl16   | 0.04164779   | 0.640344242 | 0.836511863 |

|                    |          |              |             |             |
|--------------------|----------|--------------|-------------|-------------|
| ENSMUSG00000021179 | Nrde2    | -0.041024488 | 0.640300667 | 0.836511863 |
| ENSMUSG00000025429 | Pstpip2  | -0.039457253 | 0.640314202 | 0.836511863 |
| ENSMUSG00000028393 | Alad     | -0.039315552 | 0.640180422 | 0.836511863 |
| ENSMUSG00000029173 | Sepsecs  | 0.041451569  | 0.640093372 | 0.836511863 |
| ENSMUSG00000030284 | Creld1   | 0.035556717  | 0.640346949 | 0.836511863 |
| ENSMUSG00000036943 | Rab8b    | 0.040809168  | 0.640264594 | 0.836511863 |
| ENSMUSG00000062190 | Lancl2   | 0.041499766  | 0.640398623 | 0.836511863 |
| ENSMUSG00000036180 | Gatad2a  | -0.040296106 | 0.640524221 | 0.836587944 |
| ENSMUSG00000040738 | Ints8    | 0.04125782   | 0.640905537 | 0.836997968 |
| ENSMUSG00000028018 | Gstcd    | -0.043438267 | 0.64165329  | 0.837710271 |
| ENSMUSG00000033862 | Cdk10    | -0.039491019 | 0.641578707 | 0.837710271 |
| ENSMUSG00000048445 | Ccdc57   | -0.034900131 | 0.641602449 | 0.837710271 |
| ENSMUSG00000032375 | Aph1b    | -0.029858819 | 0.641768159 | 0.837772181 |
| ENSMUSG00000026773 | Pfkfb3   | 0.039220004  | 0.642503766 | 0.838027856 |
| ENSMUSG00000026988 | Wdsub1   | 0.038980733  | 0.642232513 | 0.838027856 |
| ENSMUSG00000029408 | Abcb9    | 0.034721034  | 0.642359331 | 0.838027856 |
| ENSMUSG00000036093 | Arl5a    | 0.041298611  | 0.642362567 | 0.838027856 |
| ENSMUSG00000036749 | Pramel5  | 0.024387481  | 0.642373994 | 0.838027856 |
| ENSMUSG00000059834 | Sc1t1    | -0.040777925 | 0.642467679 | 0.838027856 |
| ENSMUSG00000072770 | Acrbp    | -0.021912106 | 0.642067796 | 0.838027856 |
| ENSMUSG00000072946 | Ptgr2    | 0.036242691  | 0.642396184 | 0.838027856 |
| ENSMUSG00000047293 | Gpr15    | 0.026222944  | 0.64268742  | 0.838179383 |
| ENSMUSG00000078584 | AU022252 | 0.041111053  | 0.643068668 | 0.838588548 |
| ENSMUSG00000022685 | Parn     | -0.040695731 | 0.643187001 | 0.838624247 |
| ENSMUSG00000040272 | Accs     | -0.039725112 | 0.643231076 | 0.838624247 |
| ENSMUSG00000003575 | Crtc1    | -0.036114797 | 0.643314449 | 0.838644917 |
| ENSMUSG00000047777 | Phf13    | -0.037917842 | 0.644016315 | 0.839471786 |
| ENSMUSG00000032579 | Hemk1    | 0.037230943  | 0.644313169 | 0.839682496 |
| ENSMUSG00000034525 | Ice1     | 0.038493498  | 0.644306423 | 0.839682496 |
| ENSMUSG00000018509 | Cenpv    | 0.038589711  | 0.644390681 | 0.83969541  |
| ENSMUSG00000028737 | Aldh4a1  | -0.040083282 | 0.644652605 | 0.8398085   |
| ENSMUSG00000061533 | Cep128   | -0.038828263 | 0.644651666 | 0.8398085   |
| ENSMUSG00000080896 | Gm14567  | 0.039697667  | 0.644680304 | 0.8398085   |
| ENSMUSG00000064288 | Hist1h4k | 0.038136542  | 0.644861903 | 0.839956973 |
| ENSMUSG00000050382 | Kif7     | -0.025877229 | 0.645187372 | 0.840292791 |
| ENSMUSG00000078786 | BC024978 | 0.020829711  | 0.645330921 | 0.84039163  |
| ENSMUSG00000019726 | Lyst     | -0.035595271 | 0.64588011  | 0.841018644 |
| ENSMUSG00000097473 | Gm26585  | 0.020766044  | 0.646005817 | 0.841094156 |
| ENSMUSG00000038740 | Mvb12b   | 0.040781688  | 0.646104266 | 0.841134167 |
| ENSMUSG00000018326 | Ywhab    | 0.035225358  | 0.646741408 | 0.841403434 |
| ENSMUSG00000021792 | Fam213a  | 0.039698342  | 0.646522214 | 0.841403434 |
| ENSMUSG00000022684 | Bfar     | -0.037200152 | 0.647014596 | 0.841403434 |
| ENSMUSG00000022865 | Cxadr    | 0.021215023  | 0.646634264 | 0.841403434 |

|                    |               |              |             |             |
|--------------------|---------------|--------------|-------------|-------------|
| ENSMUSG00000031370 | Zrsr2         | 0.040361832  | 0.646738229 | 0.841403434 |
| ENSMUSG00000038871 | Bpgm          | -0.040083822 | 0.647056244 | 0.841403434 |
| ENSMUSG00000042680 | Garem1        | -0.018401459 | 0.647036744 | 0.841403434 |
| ENSMUSG00000056209 | Npm3          | 0.035029062  | 0.646603127 | 0.841403434 |
| ENSMUSG00000058290 | Espl1         | 0.039667652  | 0.646736285 | 0.841403434 |
| ENSMUSG00000115027 | Vmn1r81       | -0.027906817 | 0.646933107 | 0.841403434 |
| ENSMUSG00000117209 | CAA01162718.1 | -0.034664486 | 0.646900853 | 0.841403434 |
| ENSMUSG00000016559 | H3f3b         | 0.047277879  | 0.647199689 | 0.841413789 |
| ENSMUSG00000020641 | Rsad2         | 0.013929376  | 0.647198694 | 0.841413789 |
| ENSMUSG00000018398 | Sept8         | -0.020347142 | 0.647825543 | 0.842055325 |
| ENSMUSG00000024095 | Hnrnp11       | -0.038381576 | 0.647828733 | 0.842055325 |
| ENSMUSG00000021973 | Micu2         | -0.037638229 | 0.64811379  | 0.842203629 |
| ENSMUSG00000027667 | Zfp639        | -0.039684491 | 0.648146243 | 0.842203629 |
| ENSMUSG00000042015 | Wdr41         | -0.04007453  | 0.648063301 | 0.842203629 |
| ENSMUSG00000048368 | Omd           | 0.022126942  | 0.648398737 | 0.842443589 |
| ENSMUSG00000028479 | Gne           | -0.038536021 | 0.648837427 | 0.842925393 |
| ENSMUSG00000004814 | Ccl24         | -0.027711532 | 0.649079566 | 0.843151777 |
| ENSMUSG00000030545 | Pex11a        | 0.031316524  | 0.649195766 | 0.843214536 |
| ENSMUSG00000027132 | Katnbl1       | -0.041337209 | 0.64928893  | 0.843246919 |
| ENSMUSG00000095789 | Nupr11        | -0.022548792 | 0.649356475 | 0.843246919 |
| ENSMUSG00000012819 | Cdh23         | -0.022817986 | 0.649596512 | 0.843404301 |
| ENSMUSG00000030654 | Arl6ip1       | 0.032155744  | 0.649681374 | 0.843404301 |
| ENSMUSG00000035692 | Isg15         | -0.021733371 | 0.649616843 | 0.843404301 |
| ENSMUSG00000091649 | Phf11b        | -0.028866805 | 0.649776676 | 0.843439868 |
| ENSMUSG00000027956 | Tmem144       | -0.029529723 | 0.649861776 | 0.843462186 |
| ENSMUSG00000095463 | Entpd4        | -0.039123515 | 0.650044977 | 0.843611813 |
| ENSMUSG00000000439 | Mktn2         | -0.039545638 | 0.650379574 | 0.843870039 |
| ENSMUSG00000107863 | Gm44389       | 0.02474554   | 0.650379831 | 0.843870039 |
| ENSMUSG00000020308 | Tpgs1         | 0.039418545  | 0.650661455 | 0.844033877 |
| ENSMUSG00000036330 | Slc18a1       | 0.021972045  | 0.650709959 | 0.844033877 |
| ENSMUSG00000038279 | Nop2          | 0.03974397   | 0.650609012 | 0.844033877 |
| ENSMUSG00000039202 | Abhd2         | 0.036154079  | 0.65082742  | 0.844091997 |
| ENSMUSG00000044475 | Ascc1         | 0.03033966   | 0.650890681 | 0.844091997 |
| ENSMUSG00000030393 | Zik1          | 0.02234697   | 0.650959442 | 0.84409304  |
| ENSMUSG00000026860 | Sh3glb2       | -0.038947843 | 0.651458649 | 0.844568737 |
| ENSMUSG00000031883 | Car7          | -0.021532328 | 0.651462287 | 0.844568737 |
| ENSMUSG00000019986 | Ahi1          | -0.039434423 | 0.651547006 | 0.844590415 |
| ENSMUSG00000025027 | Xpnpep1       | -0.039234909 | 0.651692396 | 0.844690728 |
| ENSMUSG00000026896 | Ifih1         | -0.023613504 | 0.651784459 | 0.844721908 |
| ENSMUSG00000000204 | Slfn4         | -0.023975791 | 0.651887275 | 0.844767015 |
| ENSMUSG00000027663 | Zmat3         | 0.020219328  | 0.652086879 | 0.844937526 |
| ENSMUSG00000031021 | Tmem9b        | 0.032363085  | 0.652397126 | 0.845075055 |
| ENSMUSG00000082545 | Gm12196       | 0.027670331  | 0.652378393 | 0.845075055 |

|                    |               |              |             |             |
|--------------------|---------------|--------------|-------------|-------------|
| ENSMUSG00000095690 | Rab11b-ps2    | -0.038331589 | 0.652305431 | 0.845075055 |
| ENSMUSG00000027935 | Rab13         | 0.027935957  | 0.652825605 | 0.845365601 |
| ENSMUSG00000031227 | Magee1        | -0.024490145 | 0.652796608 | 0.845365601 |
| ENSMUSG00000033790 | Tubgcp5       | 0.039301228  | 0.652818609 | 0.845365601 |
| ENSMUSG00000034575 | Tent4a        | 0.035228268  | 0.652984596 | 0.845483338 |
| ENSMUSG00000038417 | Fig4          | -0.038354825 | 0.653224633 | 0.845705979 |
| ENSMUSG00000031358 | Msl3          | 0.035576297  | 0.653353855 | 0.845754913 |
| ENSMUSG00000106924 | Gm42857       | -0.025878049 | 0.653398611 | 0.845754913 |
| ENSMUSG00000005078 | Jkamp         | -0.039096614 | 0.653489666 | 0.845784635 |
| ENSMUSG00000015023 | Ddx19a        | -0.034760259 | 0.653884712 | 0.84613671  |
| ENSMUSG00000040177 | 2310057M21Rik | 0.039826226  | 0.653897937 | 0.84613671  |
| ENSMUSG00000029502 | Golga3        | 0.039634135  | 0.654191897 | 0.846348855 |
| ENSMUSG00000036634 | Mag           | 0.028632198  | 0.654198161 | 0.846348855 |
| ENSMUSG00000030714 | Sgf29         | 0.037711377  | 0.65438301  | 0.84649983  |
| ENSMUSG00000109865 | Hspa14        | -0.037951573 | 0.654563041 | 0.846644542 |
| ENSMUSG00000081739 | Mdm4-ps       | 0.029577447  | 0.654638587 | 0.846654091 |
| ENSMUSG00000022751 | Nit2          | -0.037214505 | 0.655018831 | 0.846705058 |
| ENSMUSG00000026069 | Ii1rl1        | 0.011292071  | 0.654991938 | 0.846705058 |
| ENSMUSG00000031166 | Wdr13         | -0.035041425 | 0.654934593 | 0.846705058 |
| ENSMUSG00000042111 | Ccdc115       | 0.039510128  | 0.65480013  | 0.846705058 |
| ENSMUSG00000072421 | Gm10357       | 0.036374418  | 0.654855736 | 0.846705058 |
| ENSMUSG00000020265 | Sumo3         | 0.038625714  | 0.655690399 | 0.847064638 |
| ENSMUSG00000025283 | Sat1          | 0.033987978  | 0.655445671 | 0.847064638 |
| ENSMUSG00000035165 | Kcne3         | -0.027804845 | 0.655594361 | 0.847064638 |
| ENSMUSG00000039841 | Zfp800        | -0.038643328 | 0.655514861 | 0.847064638 |
| ENSMUSG00000041815 | Poldip3       | -0.038956816 | 0.655383197 | 0.847064638 |
| ENSMUSG00000047466 | 8030462N17Rik | -0.037729073 | 0.655774379 | 0.847064638 |
| ENSMUSG00000078180 | Gm20900       | 0.018463691  | 0.655715803 | 0.847064638 |
| ENSMUSG00000040167 | Ikzf5         | 0.032741845  | 0.656028341 | 0.847304567 |
| ENSMUSG00000024030 | Abcg1         | -0.0276135   | 0.656104464 | 0.84731478  |
| ENSMUSG00000030726 | Pold3         | 0.037056349  | 0.656539868 | 0.847788928 |
| ENSMUSG00000054091 | 1810037I17Rik | 0.038262409  | 0.656809756 | 0.84804927  |
| ENSMUSG00000028053 | Ash1l         | -0.037672781 | 0.657454253 | 0.848440445 |
| ENSMUSG00000029027 | Dffb          | -0.039191634 | 0.657419645 | 0.848440445 |
| ENSMUSG00000031988 | Vps26b        | -0.038126096 | 0.657260866 | 0.848440445 |
| ENSMUSG00000042625 | Safb2         | -0.03904932  | 0.65743772  | 0.848440445 |
| ENSMUSG00000044952 | Kctd21        | -0.022606354 | 0.657437029 | 0.848440445 |
| ENSMUSG00000020592 | Sdc1          | 0.027821072  | 0.657733272 | 0.848557593 |
| ENSMUSG00000038646 | Ramac         | 0.0373009    | 0.65774998  | 0.848557593 |
| ENSMUSG00000043282 | Teddm1b       | -0.028672436 | 0.657657096 | 0.848557593 |
| ENSMUSG00000003452 | Bicd1         | 0.034375025  | 0.658258193 | 0.848948709 |
| ENSMUSG00000020326 | Ccng1         | -0.039018091 | 0.65813858  | 0.848948709 |
| ENSMUSG00000061455 | Stx17         | 0.039369467  | 0.658225711 | 0.848948709 |

|                    |               |              |             |             |
|--------------------|---------------|--------------|-------------|-------------|
| ENSMUSG00000027395 | Polr1b        | 0.038898375  | 0.658366925 | 0.848990566 |
| ENSMUSG00000047221 | Fam185a       | 0.038568758  | 0.65842735  | 0.848990566 |
| ENSMUSG00000032739 | Pram1         | -0.036682225 | 0.658737997 | 0.849126678 |
| ENSMUSG00000053477 | Tcf4          | -0.039214111 | 0.658651981 | 0.849126678 |
| ENSMUSG00000060098 | Prmt7         | -0.038918743 | 0.658690666 | 0.849126678 |
| ENSMUSG00000026761 | Orc4          | 0.039008651  | 0.65898532  | 0.849357337 |
| ENSMUSG00000023982 | Guca1a        | -0.038816056 | 0.659112766 | 0.849433457 |
| ENSMUSG00000049709 | Nlrp10        | -0.026847326 | 0.659347122 | 0.849647329 |
| ENSMUSG00000027551 | Zfp64         | -0.038892341 | 0.659563135 | 0.849837521 |
| ENSMUSG00000096370 | Gm21992       | -0.037488607 | 0.659968419 | 0.850271521 |
| ENSMUSG00000021891 | Mettl6        | 0.043060586  | 0.66019693  | 0.850359714 |
| ENSMUSG00000022013 | Dnajc15       | 0.03819532   | 0.660149754 | 0.850359714 |
| ENSMUSG00000026563 | Tada1         | 0.037867154  | 0.660418005 | 0.850359714 |
| ENSMUSG00000028121 | Bcar3         | 0.028023088  | 0.660305497 | 0.850359714 |
| ENSMUSG00000029465 | Arpc3         | 0.036996345  | 0.660447642 | 0.850359714 |
| ENSMUSG00000029729 | Zkscan1       | 0.036953591  | 0.660372696 | 0.850359714 |
| ENSMUSG00000017831 | Rab5a         | -0.03851269  | 0.660854288 | 0.850795098 |
| ENSMUSG00000026821 | Ralgds        | -0.021532335 | 0.661162727 | 0.85087685  |
| ENSMUSG00000047084 | Ngrn          | -0.034569097 | 0.661137979 | 0.85087685  |
| ENSMUSG00000050212 | Eva1b         | -0.024782991 | 0.661191801 | 0.85087685  |
| ENSMUSG00000117340 | AC154343.2    | -0.003310668 | 0.66116472  | 0.85087685  |
| ENSMUSG00000090100 | Ttbk2         | 0.017111606  | 0.661287783 | 0.850912209 |
| ENSMUSG00000032123 | Dpagt1        | -0.035159754 | 0.661468052 | 0.85096743  |
| ENSMUSG00000042997 | Nhlrc3        | 0.036098489  | 0.661491864 | 0.85096743  |
| ENSMUSG00000091537 | Tma7          | 0.034904382  | 0.661536229 | 0.85096743  |
| ENSMUSG00000013155 | Enkd1         | 0.038476888  | 0.661770239 | 0.851164576 |
| ENSMUSG00000021408 | Ripk1         | -0.038178516 | 0.661826542 | 0.851164576 |
| ENSMUSG00000022546 | Gpt           | 0.033246425  | 0.662073213 | 0.851340633 |
| ENSMUSG00000038732 | Mboat1        | -0.038582354 | 0.662193021 | 0.851340633 |
| ENSMUSG00000038872 | Zfhx3         | -0.018102382 | 0.662237597 | 0.851340633 |
| ENSMUSG00000040268 | Plekha1       | 0.033053315  | 0.66220468  | 0.851340633 |
| ENSMUSG00000067242 | Lgi1          | -0.018741719 | 0.66251002  | 0.851602707 |
| ENSMUSG00000015882 | Lcorl         | 0.038654101  | 0.664126732 | 0.851943276 |
| ENSMUSG00000019756 | Prl8a1        | 0.025635714  | 0.663801954 | 0.851943276 |
| ENSMUSG00000022119 | Rbm26         | 0.037662779  | 0.663413758 | 0.851943276 |
| ENSMUSG00000023286 | Ube2j2        | 0.04008024   | 0.663639413 | 0.851943276 |
| ENSMUSG00000024069 | Slc30a6       | 0.036824803  | 0.664199444 | 0.851943276 |
| ENSMUSG00000024349 | Tmem173       | 0.036326606  | 0.663588652 | 0.851943276 |
| ENSMUSG00000025058 | 5430427O19Rik | -0.038286177 | 0.663916635 | 0.851943276 |
| ENSMUSG00000025722 | Wdr73         | 0.035747461  | 0.664274284 | 0.851943276 |
| ENSMUSG00000028525 | Pde4b         | -0.032681987 | 0.663304111 | 0.851943276 |
| ENSMUSG00000028886 | Eya3          | -0.037574967 | 0.663470468 | 0.851943276 |
| ENSMUSG00000031153 | Gripap1       | -0.037761457 | 0.663944198 | 0.851943276 |

|                    |            |              |             |             |
|--------------------|------------|--------------|-------------|-------------|
| ENSMUSG00000031879 | Ciao2b     | 0.038691153  | 0.663707368 | 0.851943276 |
| ENSMUSG00000032041 | Tirap      | -0.03557781  | 0.663073336 | 0.851943276 |
| ENSMUSG00000055835 | Zfp1       | 0.038718976  | 0.663060228 | 0.851943276 |
| ENSMUSG00000059554 | Ccdc28a    | 0.033578458  | 0.663643886 | 0.851943276 |
| ENSMUSG00000061653 | Vmn1r46    | 0.029978556  | 0.664177799 | 0.851943276 |
| ENSMUSG00000063656 | Gm10135    | -0.026751315 | 0.663343901 | 0.851943276 |
| ENSMUSG00000064061 | Dzip3      | -0.035655434 | 0.664283924 | 0.851943276 |
| ENSMUSG00000071714 | Csf2rb2    | -0.028364477 | 0.663843177 | 0.851943276 |
| ENSMUSG00000079043 | Fastkd5    | 0.037235912  | 0.663978626 | 0.851943276 |
| ENSMUSG00000097394 | Tmem134    | -0.036828715 | 0.663786703 | 0.851943276 |
| ENSMUSG00000111269 | Gm47933    | 0.029435445  | 0.663491229 | 0.851943276 |
| ENSMUSG00000038525 | Armc10     | 0.037177014  | 0.664755215 | 0.852421296 |
| ENSMUSG00000048440 | Cyp4f16    | -0.037521691 | 0.664793905 | 0.852421296 |
| ENSMUSG00000031349 | Nsdhl      | -0.036514358 | 0.665008878 | 0.852608925 |
| ENSMUSG00000025981 | Coq10b     | 0.038474507  | 0.665230349 | 0.852628848 |
| ENSMUSG00000112049 | Gm48269    | -0.005052782 | 0.66519592  | 0.852628848 |
| ENSMUSG00000113978 | Gm48260    | 0.015306731  | 0.665189408 | 0.852628848 |
| ENSMUSG00000014592 | Camta1     | -0.037220317 | 0.665843305 | 0.852733417 |
| ENSMUSG00000021868 | Ppif       | 0.032255795  | 0.665607477 | 0.852733417 |
| ENSMUSG00000027555 | Car13      | 0.032271472  | 0.665861156 | 0.852733417 |
| ENSMUSG00000028869 | Gnl2       | -0.036567039 | 0.665788833 | 0.852733417 |
| ENSMUSG00000030443 | Zfp583     | 0.024379121  | 0.665622465 | 0.852733417 |
| ENSMUSG00000031982 | Arv1       | 0.038115118  | 0.665632994 | 0.852733417 |
| ENSMUSG00000034422 | Parp14     | 0.029942136  | 0.665769302 | 0.852733417 |
| ENSMUSG00000063382 | Bcl9l      | -0.016897914 | 0.665708577 | 0.852733417 |
| ENSMUSG00000050017 | Pitpnb     | -0.036890016 | 0.666373597 | 0.853213736 |
| ENSMUSG00000063450 | Syne2      | -0.033649151 | 0.666330281 | 0.853213736 |
| ENSMUSG00000028671 | Gale       | -0.036221629 | 0.666663903 | 0.853264694 |
| ENSMUSG00000042042 | Csgalnact2 | 0.037793107  | 0.666682229 | 0.853264694 |
| ENSMUSG00000046056 | Sbsn       | 0.030914731  | 0.666586997 | 0.853264694 |
| ENSMUSG00000067787 | Blcap      | -0.038857761 | 0.666736532 | 0.853264694 |
| ENSMUSG00000079104 | Prps1l3    | 0.036148773  | 0.666825568 | 0.853264694 |
| ENSMUSG00000081833 | Gm13669    | 0.021098554  | 0.666772482 | 0.853264694 |
| ENSMUSG00000033904 | Ccp110     | 0.035142548  | 0.666988777 | 0.853297724 |
| ENSMUSG00000058357 | Gm6612     | 0.018373885  | 0.66696362  | 0.853297724 |
| ENSMUSG00000021311 | Mtr        | 0.037072187  | 0.667401692 | 0.853738045 |
| ENSMUSG00000020258 | Glyctk     | -0.016624484 | 0.667780777 | 0.85395913  |
| ENSMUSG00000033478 | Fam160b1   | -0.037175256 | 0.667703819 | 0.85395913  |
| ENSMUSG00000040374 | Pex2       | 0.037526094  | 0.667724659 | 0.85395913  |
| ENSMUSG00000078630 | Tomt       | -0.025925448 | 0.667917972 | 0.854046647 |
| ENSMUSG00000053347 | Zfp943     | -0.03631614  | 0.668003193 | 0.854067695 |
| ENSMUSG00000085611 | Ap3s1-ps1  | 0.038031761  | 0.668502397 | 0.854617978 |
| ENSMUSG00000001774 | Chordc1    | -0.035168616 | 0.668894145 | 0.854957955 |

|                    |               |              |             |             |
|--------------------|---------------|--------------|-------------|-------------|
| ENSMUSG00000030986 | Dhx32         | -0.03764242  | 0.669220094 | 0.854957955 |
| ENSMUSG00000036534 | Slc38a7       | -0.032368776 | 0.669274095 | 0.854957955 |
| ENSMUSG00000039452 | Snx22         | 0.023742373  | 0.669318988 | 0.854957955 |
| ENSMUSG00000055148 | Klf2          | 0.02167452   | 0.669169594 | 0.854957955 |
| ENSMUSG00000055319 | Sec23ip       | -0.036409913 | 0.669265187 | 0.854957955 |
| ENSMUSG00000055629 | B4galnt4      | 0.014778421  | 0.669208301 | 0.854957955 |
| ENSMUSG00000060743 | H3f3a         | -0.046477453 | 0.669124423 | 0.854957955 |
| ENSMUSG00000044881 | Coa4          | -0.037554702 | 0.669427899 | 0.855009145 |
| ENSMUSG00000031918 | Mtmr2         | 0.037400077  | 0.669721526 | 0.855296224 |
| ENSMUSG00000017466 | Timp2         | 0.034537233  | 0.670168174 | 0.855690675 |
| ENSMUSG00000021559 | Dapk1         | -0.027958632 | 0.670149621 | 0.855690675 |
| ENSMUSG00000034274 | Thoc5         | 0.035138013  | 0.67030836  | 0.855695047 |
| ENSMUSG00000075279 | Mrpl23-ps1    | 0.037110091  | 0.67030938  | 0.855695047 |
| ENSMUSG00000032519 | Slc25a38      | -0.036988919 | 0.670387425 | 0.855706732 |
| ENSMUSG00000022361 | Zhx1          | 0.037627611  | 0.670548891 | 0.855824885 |
| ENSMUSG00000021288 | Klc1          | -0.03470324  | 0.670882735 | 0.856162998 |
| ENSMUSG00000007891 | Ctsd          | 0.032775768  | 0.67099698  | 0.856214527 |
| ENSMUSG00000014959 | Gorasp2       | -0.034166195 | 0.671129912 | 0.856214527 |
| ENSMUSG00000066902 | Rps23-ps2     | 0.005466115  | 0.67109351  | 0.856214527 |
| ENSMUSG00000025911 | Adhfe1        | 0.01648091   | 0.671246889 | 0.856275814 |
| ENSMUSG00000056310 | Tyw1          | -0.037307516 | 0.671424324 | 0.856375289 |
| ENSMUSG00000107476 | Zfp862-ps     | -0.02117602  | 0.67146276  | 0.856375289 |
| ENSMUSG00000023169 | Slc38a1       | 0.035299521  | 0.67176031  | 0.856666818 |
| ENSMUSG00000030689 | Ino80e        | 0.032865862  | 0.672009068 | 0.856888685 |
| ENSMUSG00000035891 | Cerk          | 0.037528082  | 0.672072262 | 0.856888685 |
| ENSMUSG00000015214 | Mtmr1         | 0.043806862  | 0.672149268 | 0.856898908 |
| ENSMUSG00000003929 | Zfp81         | 0.033989914  | 0.672418428 | 0.856953241 |
| ENSMUSG00000022286 | Grhl2         | -0.020153319 | 0.67242648  | 0.856953241 |
| ENSMUSG00000024474 | Ik            | 0.034459203  | 0.672605841 | 0.856953241 |
| ENSMUSG00000032463 | Faim          | 0.036140208  | 0.672542607 | 0.856953241 |
| ENSMUSG00000044715 | Gskip         | 0.03519043   | 0.672315599 | 0.856953241 |
| ENSMUSG00000054675 | Tmem119       | -0.037249913 | 0.67257964  | 0.856953241 |
| ENSMUSG00000026810 | Dpm2          | 0.032027365  | 0.672712078 | 0.857000689 |
| ENSMUSG00000032840 | 2410131K14Rik | -0.036619173 | 0.672821657 | 0.857052384 |
| ENSMUSG00000043391 | 2510009E07Rik | 0.020168101  | 0.673095082 | 0.857312758 |
| ENSMUSG00000083240 | Gm13453       | 0.035980333  | 0.673584784 | 0.857832678 |
| ENSMUSG00000099693 | Gm29284       | 0.02788639   | 0.673641409 | 0.857832678 |
| ENSMUSG00000002486 | Tchp          | -0.03059219  | 0.674230245 | 0.857899428 |
| ENSMUSG00000013997 | Nit1          | -0.036941151 | 0.673894511 | 0.857899428 |
| ENSMUSG00000020124 | Usp15         | 0.032791222  | 0.674165989 | 0.857899428 |
| ENSMUSG00000022560 | Slc52a2       | -0.036945578 | 0.673827904 | 0.857899428 |
| ENSMUSG00000024240 | Epc1          | -0.034160406 | 0.674031034 | 0.857899428 |
| ENSMUSG00000048924 | Ccdc125       | -0.036343711 | 0.674047483 | 0.857899428 |

|                    |               |              |             |             |
|--------------------|---------------|--------------|-------------|-------------|
| ENSMUSG00000078580 | E430018J23Rik | 0.030955736  | 0.674246375 | 0.857899428 |
| ENSMUSG00000084383 | Gm13370       | 0.004403571  | 0.673971334 | 0.857899428 |
| ENSMUSG00000024026 | Glo1          | 0.032414587  | 0.674426153 | 0.858040279 |
| ENSMUSG00000024109 | Nrxn1         | -0.022751584 | 0.674575966 | 0.858142981 |
| ENSMUSG00000027665 | Pik3ca        | -0.035701666 | 0.67482998  | 0.858290311 |
| ENSMUSG00000033126 | Ybey          | -0.034828742 | 0.674808485 | 0.858290311 |
| ENSMUSG00000052387 | Trpm3         | 0.016133058  | 0.675122701 | 0.858398922 |
| ENSMUSG00000056537 | Rlim          | 0.034254121  | 0.674998197 | 0.858398922 |
| ENSMUSG00000070282 | 3000002C10Rik | 0.033140044  | 0.675113427 | 0.858398922 |
| ENSMUSG00000074529 | Zfp972        | 0.017387211  | 0.675224337 | 0.858440275 |
| ENSMUSG00000001999 | Blvra         | 0.037140161  | 0.675480189 | 0.858677661 |
| ENSMUSG00000028049 | Scamp3        | 0.03232536   | 0.675597586 | 0.858739011 |
| ENSMUSG00000019998 | Stx7          | -0.036755409 | 0.675812842 | 0.858924722 |
| ENSMUSG00000017843 | Ppp2r5c       | 0.033058929  | 0.675998469 | 0.85902258  |
| ENSMUSG00000030609 | Aen           | 0.035051701  | 0.676028155 | 0.85902258  |
| ENSMUSG00000042535 | Gtpbp1        | -0.03422233  | 0.676179168 | 0.859038708 |
| ENSMUSG00000113691 | Gm38699       | -0.023323933 | 0.67612309  | 0.859038708 |
| ENSMUSG00000020516 | Rps6kb1       | 0.034605416  | 0.676589897 | 0.859447348 |
| ENSMUSG00000028847 | Trappc3       | -0.036680062 | 0.676777595 | 0.859447348 |
| ENSMUSG00000053291 | Rab4b         | -0.037595001 | 0.67671228  | 0.859447348 |
| ENSMUSG00000060121 | Gemin2        | -0.036679713 | 0.676646777 | 0.859447348 |
| ENSMUSG00000019814 | Ltv1          | 0.034362703  | 0.677158649 | 0.859634347 |
| ENSMUSG00000032431 | Crtap         | 0.036581072  | 0.677249246 | 0.859634347 |
| ENSMUSG00000045973 | Slc25a51      | 0.035142268  | 0.677270499 | 0.859634347 |
| ENSMUSG00000048661 | Lemd3         | 0.031643466  | 0.677270889 | 0.859634347 |
| ENSMUSG00000063160 | Numb1         | -0.01677427  | 0.67701174  | 0.859634347 |
| ENSMUSG00000039356 | Exosc2        | 0.035520554  | 0.677474759 | 0.859805249 |
| ENSMUSG00000030161 | Gabarapl1     | -0.036762279 | 0.677987553 | 0.860368145 |
| ENSMUSG00000057778 | Cyb5d2        | 0.021480418  | 0.678178345 | 0.860522344 |
| ENSMUSG00000022108 | Itm2b         | -0.034008892 | 0.678496133 | 0.860570561 |
| ENSMUSG00000025147 | Mob2          | -0.036189157 | 0.678839224 | 0.860570561 |
| ENSMUSG00000033706 | Smyd5         | -0.03381783  | 0.678760679 | 0.860570561 |
| ENSMUSG00000040928 | S100pbp       | -0.028317355 | 0.678619813 | 0.860570561 |
| ENSMUSG00000051166 | Eml5          | -0.026930767 | 0.67845797  | 0.860570561 |
| ENSMUSG00000061561 | Olfr373       | 0.02070275   | 0.678725382 | 0.860570561 |
| ENSMUSG00000073002 | Vamp5         | 0.036317374  | 0.678604009 | 0.860570561 |
| ENSMUSG00000093859 | Gm7882        | -0.019769664 | 0.67864434  | 0.860570561 |
| ENSMUSG00000114268 | Gm48841       | 0.026253558  | 0.678839897 | 0.860570561 |
| ENSMUSG00000028999 | Rint1         | 0.02733984   | 0.678983513 | 0.860576961 |
| ENSMUSG00000054598 | 9130230L23Rik | -0.022774438 | 0.678963753 | 0.860576961 |
| ENSMUSG00000039887 | Alg14         | 0.035993857  | 0.67918159  | 0.860740183 |
| ENSMUSG00000009741 | Ubp1          | 0.034770546  | 0.679379354 | 0.860817758 |
| ENSMUSG00000073982 | Rhog          | 0.035632239  | 0.679381409 | 0.860817758 |

|                    |          |              |             |             |
|--------------------|----------|--------------|-------------|-------------|
| ENSMUSG00000056429 | Tgoln1   | 0.036248167  | 0.67955106  | 0.860944892 |
| ENSMUSG00000026172 | Bcs1l    | -0.036046581 | 0.679826441 | 0.861053636 |
| ENSMUSG00000026596 | Abl2     | -0.019191049 | 0.679888734 | 0.861053636 |
| ENSMUSG00000028454 | Pigo     | -0.031983375 | 0.679914182 | 0.861053636 |
| ENSMUSG00000037761 | Actr5    | -0.028929787 | 0.679886846 | 0.861053636 |
| ENSMUSG00000018199 | Trove2   | -0.022778886 | 0.67998944  | 0.861061152 |
| ENSMUSG00000046794 | Ppp1r3b  | 0.026374855  | 0.680291648 | 0.861356021 |
| ENSMUSG00000022568 | Scrib    | 0.028485359  | 0.680490843 | 0.861432609 |
| ENSMUSG00000054013 | Tmem179  | 0.016225777  | 0.680453731 | 0.861432609 |
| ENSMUSG00000015994 | Fnta     | -0.036380696 | 0.680571948 | 0.861447485 |
| ENSMUSG00000060376 | Bckdha   | 0.037021251  | 0.680664275 | 0.861476559 |
| ENSMUSG00000016637 | Ift27    | 0.03613675   | 0.681210254 | 0.861564019 |
| ENSMUSG00000021365 | Nedd9    | -0.032124059 | 0.681575792 | 0.861564019 |
| ENSMUSG00000021555 | Naa35    | -0.036127571 | 0.681692744 | 0.861564019 |
| ENSMUSG00000026027 | Stradb   | 0.034357236  | 0.680999902 | 0.861564019 |
| ENSMUSG00000028843 | Sh3bgrl3 | 0.027155119  | 0.681494885 | 0.861564019 |
| ENSMUSG00000032656 | March3   | 0.01867618   | 0.681139995 | 0.861564019 |
| ENSMUSG00000038290 | Smg6     | 0.036506541  | 0.681643832 | 0.861564019 |
| ENSMUSG00000041859 | Mcm3     | -0.029440737 | 0.681446451 | 0.861564019 |
| ENSMUSG00000042797 | Aqp11    | -0.028589378 | 0.681388025 | 0.861564019 |
| ENSMUSG00000051444 | Bbs12    | 0.030216462  | 0.680982108 | 0.861564019 |
| ENSMUSG00000054901 | Arhgef33 | 0.008904263  | 0.680946557 | 0.861564019 |
| ENSMUSG00000069793 | Sifn9    | 0.036113998  | 0.681654059 | 0.861564019 |
| ENSMUSG00000075256 | Cerkl    | -0.034200759 | 0.68164618  | 0.861564019 |
| ENSMUSG00000095362 | Gm14325  | -0.028166794 | 0.681704466 | 0.861564019 |
| ENSMUSG00000021428 | Riok1    | 0.032935209  | 0.681870306 | 0.861685937 |
| ENSMUSG00000016520 | Lnx2     | 0.029787557  | 0.682132285 | 0.861929309 |
| ENSMUSG00000030397 | Mark4    | 0.024721439  | 0.682224663 | 0.86195835  |
| ENSMUSG00000008859 | Rala     | -0.033974858 | 0.682359013 | 0.862003433 |
| ENSMUSG00000024854 | Pold4    | -0.035911552 | 0.682498888 | 0.862003433 |
| ENSMUSG00000030054 | Gp9      | -0.019113719 | 0.682537941 | 0.862003433 |
| ENSMUSG00000031788 | Kifc3    | -0.014431487 | 0.682453188 | 0.862003433 |
| ENSMUSG00000033161 | Atp1a1   | 0.036496775  | 0.682729345 | 0.862157503 |
| ENSMUSG00000026885 | Ttll11   | 0.02045989   | 0.682863558 | 0.862239326 |
| ENSMUSG00000033352 | Map2k4   | -0.035757552 | 0.683114695 | 0.862468756 |
| ENSMUSG00000015733 | Capza2   | 0.036387699  | 0.683985122 | 0.862955541 |
| ENSMUSG00000024921 | Smarca2  | -0.035756965 | 0.683614679 | 0.862955541 |
| ENSMUSG00000026074 | Map4k4   | -0.010722358 | 0.683953943 | 0.862955541 |
| ENSMUSG00000026427 | Eif2d    | -0.03155473  | 0.683806341 | 0.862955541 |
| ENSMUSG00000030842 | Lamtor1  | -0.030997698 | 0.683933472 | 0.862955541 |
| ENSMUSG00000038384 | Setd1b   | 0.02993063   | 0.683986579 | 0.862955541 |
| ENSMUSG00000059890 | Ube4a    | -0.029457029 | 0.68364629  | 0.862955541 |
| ENSMUSG00000012443 | Kif11    | -0.033128178 | 0.684527399 | 0.863386993 |

|                    |           |              |             |             |
|--------------------|-----------|--------------|-------------|-------------|
| ENSMUSG00000044197 | Gpr146    | -0.035791933 | 0.684537083 | 0.863386993 |
| ENSMUSG00000097656 | Gm26712   | 0.035337064  | 0.684470729 | 0.863386993 |
| ENSMUSG00000025413 | Ttc4      | -0.035442592 | 0.684766424 | 0.863440813 |
| ENSMUSG00000025825 | Iscu      | 0.03469193   | 0.684908236 | 0.863440813 |
| ENSMUSG00000029162 | Khk       | -0.035987082 | 0.684927327 | 0.863440813 |
| ENSMUSG00000063875 | Rps6-ps1  | 0.021649776  | 0.684754069 | 0.863440813 |
| ENSMUSG00000079108 | Srp54c    | 0.034253048  | 0.684837218 | 0.863440813 |
| ENSMUSG00000022471 | Xrcc6     | 0.032307931  | 0.685144891 | 0.863627429 |
| ENSMUSG00000024943 | Smc5      | -0.033758039 | 0.68523279  | 0.863650582 |
| ENSMUSG00000060657 | Marf1     | 0.027665583  | 0.685325695 | 0.863680038 |
| ENSMUSG00000087370 | Tmem170b  | -0.035267401 | 0.685541947 | 0.863864921 |
| ENSMUSG00000020899 | Pfas      | 0.0338391    | 0.685889518 | 0.863972519 |
| ENSMUSG00000022901 | Cd86      | 0.025699684  | 0.685922161 | 0.863972519 |
| ENSMUSG00000024037 | Wdr4      | 0.03536956   | 0.685945201 | 0.863972519 |
| ENSMUSG00000024107 | Lhcgr     | -0.016825958 | 0.685975121 | 0.863972519 |
| ENSMUSG00000055670 | Zzef1     | 0.031616113  | 0.68595229  | 0.863972519 |
| ENSMUSG00000022749 | Tbc1d23   | -0.034884801 | 0.686238105 | 0.864216111 |
| ENSMUSG00000024381 | Bin1      | 0.033168511  | 0.686428057 | 0.864231968 |
| ENSMUSG00000035064 | Eef2k     | 0.03448302   | 0.686440716 | 0.864231968 |
| ENSMUSG00000036779 | Tent4b    | -0.027918362 | 0.686459432 | 0.864231968 |
| ENSMUSG00000046753 | Ccdc66    | 0.028000609  | 0.686637384 | 0.864368394 |
| ENSMUSG00000035530 | Eif1      | -0.031060443 | 0.686716674 | 0.864380605 |
| ENSMUSG00000010205 | Raver1    | -0.031048848 | 0.687078967 | 0.864573787 |
| ENSMUSG00000018481 | Appbp2    | 0.035792119  | 0.687041667 | 0.864573787 |
| ENSMUSG00000048720 | Tbc1d12   | -0.022232879 | 0.686945599 | 0.864573787 |
| ENSMUSG00000024966 | Stip1     | 0.034897753  | 0.687260218 | 0.864617008 |
| ENSMUSG00000029163 | Emilin1   | -0.034771115 | 0.68728354  | 0.864617008 |
| ENSMUSG00000047246 | Hist1h2be | -0.023702525 | 0.687322143 | 0.864617008 |
| ENSMUSG00000068264 | Ap5s1     | -0.032053349 | 0.687493251 | 0.864744675 |
| ENSMUSG00000022469 | Rapgef3   | -0.034104269 | 0.687777318 | 0.864815042 |
| ENSMUSG00000026944 | Abca2     | -0.029294278 | 0.688036571 | 0.864815042 |
| ENSMUSG00000031732 | Phlpp2    | 0.021320358  | 0.687901917 | 0.864815042 |
| ENSMUSG00000035311 | Gnptab    | 0.035607251  | 0.687897091 | 0.864815042 |
| ENSMUSG00000042548 | Asxl1     | -0.028732078 | 0.687920938 | 0.864815042 |
| ENSMUSG00000081111 | Gm5913    | 0.034551943  | 0.687697819 | 0.864815042 |
| ENSMUSG00000099241 | Gm18852   | 0.011327507  | 0.688013795 | 0.864815042 |
| ENSMUSG00000029229 | Chic2     | 0.035671655  | 0.68828457  | 0.865039223 |
| ENSMUSG00000004709 | Cd244a    | 0.03074379   | 0.688557022 | 0.865294089 |
| ENSMUSG00000000325 | Arvcf     | -0.013302707 | 0.688676283 | 0.86535641  |
| ENSMUSG00000022142 | Nup155    | 0.034527488  | 0.68882868  | 0.865460352 |
| ENSMUSG00000053965 | Pde5a     | 0.014342309  | 0.688942471 | 0.865515771 |
| ENSMUSG00000024505 | Dtwd2     | -0.032913903 | 0.689082634 | 0.865516776 |
| ENSMUSG00000048732 | Klhl11    | 0.02159667   | 0.689064186 | 0.865516776 |

|                    |               |              |             |             |
|--------------------|---------------|--------------|-------------|-------------|
| ENSMUSG0000000244  | Tspan32       | -0.034672225 | 0.689291952 | 0.865692147 |
| ENSMUSG00000026970 | Rbms1         | 0.031240504  | 0.689402319 | 0.865743221 |
| ENSMUSG00000023988 | Bysl          | 0.037372144  | 0.689685236 | 0.865835893 |
| ENSMUSG00000038437 | Mllt6         | -0.019692003 | 0.689645887 | 0.865835893 |
| ENSMUSG00000041396 | Mettl18       | 0.03545033   | 0.689677167 | 0.865835893 |
| ENSMUSG00000031660 | Brd7          | 0.028978851  | 0.689904951 | 0.866024194 |
| ENSMUSG00000026080 | Chst10        | -0.022726312 | 0.690315924 | 0.866196026 |
| ENSMUSG00000032495 | Lrrc2         | -0.01944371  | 0.690460257 | 0.866196026 |
| ENSMUSG00000036114 | Rpp25l        | 0.0345432    | 0.690413616 | 0.866196026 |
| ENSMUSG00000039899 | Fgl2          | 0.0352513    | 0.69033408  | 0.866196026 |
| ENSMUSG00000042396 | Rbm7          | -0.034382086 | 0.690150069 | 0.866196026 |
| ENSMUSG00000064284 | Cdpf1         | -0.033227457 | 0.690418868 | 0.866196026 |
| ENSMUSG00000000976 | Heatr6        | -0.034469432 | 0.690566227 | 0.866202315 |
| ENSMUSG00000028973 | Abcb8         | 0.032364556  | 0.690604744 | 0.866202315 |
| ENSMUSG00000053740 | Gm6457        | 0.006825828  | 0.690705146 | 0.866240773 |
| ENSMUSG00000028619 | Tceanc2       | 0.034246097  | 0.690998123 | 0.866510927 |
| ENSMUSG00000055128 | Cgrrf1        | -0.037997599 | 0.691060079 | 0.866510927 |
| ENSMUSG00000028772 | Zcchc17       | 0.035119556  | 0.691499842 | 0.866914269 |
| ENSMUSG00000036411 | 9530077C05Rik | -0.021307724 | 0.691591136 | 0.866914269 |
| ENSMUSG00000049950 | Rpp38         | 0.035182222  | 0.69158878  | 0.866914269 |
| ENSMUSG00000084957 | Bbip1         | -0.033567934 | 0.691737154 | 0.867009808 |
| ENSMUSG00000026740 | Dnajc1        | 0.035003661  | 0.69184107  | 0.86705256  |
| ENSMUSG00000029699 | Ssc4d         | -0.023058211 | 0.69221618  | 0.867347642 |
| ENSMUSG00000039354 | Smarcal1      | -0.032911164 | 0.692213064 | 0.867347642 |
| ENSMUSG00000099655 | 2310034G01Rik | 0.032888908  | 0.69228949  | 0.867352003 |
| ENSMUSG00000028439 | Fam219a       | 0.020398353  | 0.692420695 | 0.86742889  |
| ENSMUSG00000069844 | Sco1          | 0.033709065  | 0.692506423 | 0.867448798 |
| ENSMUSG00000030225 | Dera          | 0.034875754  | 0.692620293 | 0.867503949 |
| ENSMUSG00000038618 | Rassf7        | -0.031177287 | 0.692693    | 0.867507538 |
| ENSMUSG00000018405 | Mrm1          | -0.032932105 | 0.693095367 | 0.867836447 |
| ENSMUSG00000021036 | Sptlc2        | 0.034772007  | 0.693038446 | 0.867836447 |
| ENSMUSG00000001911 | Nfix          | -0.032335724 | 0.693235549 | 0.867924478 |
| ENSMUSG00000001173 | Ocrl          | 0.0288961    | 0.694551753 | 0.867968169 |
| ENSMUSG00000004508 | Gab2          | -0.029459801 | 0.694391615 | 0.867968169 |
| ENSMUSG00000005698 | Ctcf          | 0.032043534  | 0.693538029 | 0.867968169 |
| ENSMUSG00000020009 | Ifngr1        | 0.034671426  | 0.693831569 | 0.867968169 |
| ENSMUSG00000020397 | Med7          | 0.034867993  | 0.694598148 | 0.867968169 |
| ENSMUSG00000020982 | Nemf          | 0.033147278  | 0.694082329 | 0.867968169 |
| ENSMUSG00000021965 | Ska3          | -0.034383852 | 0.69363637  | 0.867968169 |
| ENSMUSG00000027884 | Clcc1         | 0.032240473  | 0.694499591 | 0.867968169 |
| ENSMUSG00000028126 | Pip5k1a       | 0.03383966   | 0.693454521 | 0.867968169 |
| ENSMUSG00000029840 | Mtpn          | 0.03179496   | 0.693808598 | 0.867968169 |
| ENSMUSG00000031723 | Txnl4b        | -0.033603131 | 0.694580761 | 0.867968169 |

|                    |               |              |             |             |
|--------------------|---------------|--------------|-------------|-------------|
| ENSMUSG00000033436 | Armcx2        | -0.028935538 | 0.694170818 | 0.867968169 |
| ENSMUSG00000036026 | Tmem63b       | -0.021947145 | 0.694078754 | 0.867968169 |
| ENSMUSG00000038187 | Btbd10        | -0.034680512 | 0.693753557 | 0.867968169 |
| ENSMUSG00000043190 | Rfesd         | -0.033914859 | 0.69423739  | 0.867968169 |
| ENSMUSG00000046567 | 4930430F08Rik | -0.033676667 | 0.694187163 | 0.867968169 |
| ENSMUSG00000059729 | Olf1385       | 0.030841606  | 0.694038949 | 0.867968169 |
| ENSMUSG00000079834 | Tmlhe         | -0.032398118 | 0.693658501 | 0.867968169 |
| ENSMUSG00000115431 | Gm3219        | 0.03386692   | 0.694256122 | 0.867968169 |
| ENSMUSG00000005973 | Rcn1          | -0.034457227 | 0.694886986 | 0.868241752 |
| ENSMUSG00000027309 | 4930402H24Rik | -0.031825929 | 0.695007011 | 0.868304373 |
| ENSMUSG00000101330 | Gm10193       | 0.033886306  | 0.695200017 | 0.868458152 |
| ENSMUSG00000023935 | Spats1        | 0.020429848  | 0.695396545 | 0.868528958 |
| ENSMUSG00000039068 | Zzz3          | 0.032926197  | 0.695383259 | 0.868528958 |
| ENSMUSG00000021583 | Erap1         | -0.034360894 | 0.695488908 | 0.86855698  |
| ENSMUSG00000014547 | Wdfy2         | 0.032190443  | 0.695585758 | 0.868590601 |
| ENSMUSG00000024287 | Thoc1         | -0.032734631 | 0.695656835 | 0.868592033 |
| ENSMUSG00000005225 | Plekha8       | 0.02953421   | 0.696138307 | 0.869018484 |
| ENSMUSG00000100153 | Ppp1ccb       | -0.033020622 | 0.696129712 | 0.869018484 |
| ENSMUSG00000028249 | Sdcbp         | -0.031387195 | 0.696218786 | 0.869031609 |
| ENSMUSG00000075254 | Heg1          | 0.027551825  | 0.696451586 | 0.869234842 |
| ENSMUSG00000020133 | 2310011J03Rik | 0.034203837  | 0.69656402  | 0.869287822 |
| ENSMUSG00000028289 | Epha7         | 0.027637554  | 0.696655889 | 0.869296493 |
| ENSMUSG00000117055 | AC098880.1    | -0.024250849 | 0.69671094  | 0.869296493 |
| ENSMUSG00000015697 | Setdb1        | 0.029820884  | 0.696931975 | 0.869379653 |
| ENSMUSG00000025747 | Tyms          | 0.033599368  | 0.696854068 | 0.869379653 |
| ENSMUSG00000028461 | Ccdc107       | 0.034188401  | 0.696987568 | 0.869379653 |
| ENSMUSG00000030852 | Tacc2         | -0.024427913 | 0.69718309  | 0.869448912 |
| ENSMUSG00000034951 | Cog7          | 0.033431772  | 0.697136558 | 0.869448912 |
| ENSMUSG00000018379 | Srsf1         | 0.034305163  | 0.697491632 | 0.869746367 |
| ENSMUSG00000063787 | Chchd1        | 0.031141719  | 0.69765645  | 0.869864562 |
| ENSMUSG00000022912 | Pros1         | 0.03361592   | 0.697851838 | 0.869933528 |
| ENSMUSG00000057181 | 5730455P16Rik | -0.034129965 | 0.697842633 | 0.869933528 |
| ENSMUSG00000024400 | Wdr33         | -0.032523651 | 0.69811069  | 0.870092822 |
| ENSMUSG00000078899 | Gm4631        | 0.031974274  | 0.698119722 | 0.870092822 |
| ENSMUSG00000040688 | Tbl3          | 0.033399587  | 0.698270631 | 0.870193589 |
| ENSMUSG00000021711 | Trappc13      | -0.031368562 | 0.698561004 | 0.870454185 |
| ENSMUSG00000060096 | Amd-ps3       | 0.004507204  | 0.698619899 | 0.870454185 |
| ENSMUSG00000019818 | Cd164         | -0.030189174 | 0.698818432 | 0.870614217 |
| ENSMUSG00000095762 | Gm16378       | -0.031793438 | 0.69890105  | 0.870629821 |
| ENSMUSG00000056749 | Nfil3         | -0.032457913 | 0.699024197 | 0.870695904 |
| ENSMUSG00000020802 | Ube2o         | -0.021742466 | 0.69910139  | 0.87070474  |
| ENSMUSG00000079605 | Zbtb9         | -0.033907142 | 0.699306259 | 0.870872573 |
| ENSMUSG00000047284 | Neur14        | -0.018952302 | 0.699554966 | 0.87092034  |

|                    |          |              |             |             |
|--------------------|----------|--------------|-------------|-------------|
| ENSMUSG00000058444 | Map2k5   | -0.033312653 | 0.69949103  | 0.87092034  |
| ENSMUSG00000114540 | Gm6421   | -0.022619705 | 0.69943662  | 0.87092034  |
| ENSMUSG00000014353 | Tmem87b  | 0.032612335  | 0.700498915 | 0.871495646 |
| ENSMUSG00000029328 | Hnrnpdl  | 0.033801188  | 0.700431418 | 0.871495646 |
| ENSMUSG00000029913 | Prdm5    | -0.031266412 | 0.700261042 | 0.871495646 |
| ENSMUSG00000052821 | Cysltr1  | -0.030748602 | 0.700420159 | 0.871495646 |
| ENSMUSG00000064181 | Rab3ip   | -0.032734769 | 0.700261781 | 0.871495646 |
| ENSMUSG00000078878 | Gm14305  | 0.03350262   | 0.700508215 | 0.871495646 |
| ENSMUSG00000093826 | Gm6900   | 0.010078995  | 0.70029048  | 0.871495646 |
| ENSMUSG00000063904 | Dpp3     | 0.028801238  | 0.700676481 | 0.871617683 |
| ENSMUSG00000020680 | Taf15    | 0.027800403  | 0.700913927 | 0.871806655 |
| ENSMUSG00000033417 | Cacul1   | 0.034021564  | 0.700968768 | 0.871806655 |
| ENSMUSG00000037366 | Pafah2   | -0.029156275 | 0.701099711 | 0.871882209 |
| ENSMUSG00000032328 | Tmem30a  | -0.034168165 | 0.701362087 | 0.872035947 |
| ENSMUSG00000057315 | Arhgap24 | -0.031001693 | 0.701363748 | 0.872035947 |
| ENSMUSG00000023904 | Hcfc1r1  | 0.031433559  | 0.701626795 | 0.87227569  |
| ENSMUSG00000024646 | Cyb5a    | 0.029880204  | 0.701893237 | 0.872358266 |
| ENSMUSG00000025521 | Tmem192  | 0.0331608    | 0.7018506   | 0.872358266 |
| ENSMUSG00000112449 | Srp54b   | 0.033792989  | 0.701903913 | 0.872358266 |
| ENSMUSG00000031590 | Frg1     | 0.02749155   | 0.702358537 | 0.872748638 |
| ENSMUSG00000031796 | Cfap20   | -0.031048131 | 0.702320191 | 0.872748638 |
| ENSMUSG00000032661 | Oas3     | 0.019213617  | 0.702484568 | 0.872766645 |
| ENSMUSG00000037791 | Phf12    | 0.030123264  | 0.702514458 | 0.872766645 |
| ENSMUSG00000048833 | Slc39a9  | -0.028367484 | 0.702583824 | 0.872766645 |
| ENSMUSG00000037913 | Tmem156  | -0.032969084 | 0.702788451 | 0.872933534 |
| ENSMUSG00000026556 | Vangl2   | 0.019895229  | 0.702894162 | 0.872977541 |
| ENSMUSG00000022756 | Slc7a4   | 0.030004949  | 0.703043228 | 0.872988097 |
| ENSMUSG00000045039 | Megf8    | 0.026328558  | 0.7029971   | 0.872988097 |
| ENSMUSG00000027694 | Gm8325   | -0.033501088 | 0.703241137 | 0.873096047 |
| ENSMUSG00000030922 | Lym1     | -0.033118013 | 0.703315855 | 0.873096047 |
| ENSMUSG00000042496 | Prdm10   | -0.02792986  | 0.703405035 | 0.873096047 |
| ENSMUSG00000073403 | Gm10499  | -0.03344581  | 0.703411331 | 0.873096047 |
| ENSMUSG00000023348 | Trip6    | -0.029279586 | 0.703514927 | 0.873137381 |
| ENSMUSG00000028603 | Scp2     | 0.031633578  | 0.703888641 | 0.873513919 |
| ENSMUSG00000098905 | Zfp953   | 0.022553825  | 0.704001334 | 0.87356649  |
| ENSMUSG00000020962 | Gtf2a1   | -0.029122833 | 0.704422056 | 0.873707159 |
| ENSMUSG00000023110 | Prmt5    | -0.033151572 | 0.704401837 | 0.873707159 |
| ENSMUSG00000030930 | Chst15   | 0.030565866  | 0.704421984 | 0.873707159 |
| ENSMUSG00000034714 | Ttyh2    | 0.017087568  | 0.704466404 | 0.873707159 |
| ENSMUSG00000036073 | Galt     | 0.033004812  | 0.704279322 | 0.873707159 |
| ENSMUSG00000034724 | Cnot6l   | -0.032973415 | 0.70472944  | 0.873907729 |
| ENSMUSG00000117098 | Myl12b   | -0.028236692 | 0.704768837 | 0.873907729 |
| ENSMUSG00000030798 | Cd37     | 0.032231983  | 0.704966523 | 0.8740656   |

|                    |          |              |             |             |
|--------------------|----------|--------------|-------------|-------------|
| ENSMUSG00000030322 | Mbd4     | 0.031338037  | 0.705300029 | 0.874188268 |
| ENSMUSG00000032009 | Sesn3    | -0.014932674 | 0.705333849 | 0.874188268 |
| ENSMUSG00000091577 | Gm6211   | -0.02225058  | 0.705346979 | 0.874188268 |
| ENSMUSG00000105504 | Gbp5     | -0.026430839 | 0.705232886 | 0.874188268 |
| ENSMUSG00000025196 | Cpn1     | 0.018157406  | 0.705572964 | 0.874381102 |
| ENSMUSG00000044982 | Sft2d3   | -0.032747149 | 0.705663974 | 0.874406646 |
| ENSMUSG00000037816 | Fbxw17   | -0.029944878 | 0.705876826 | 0.874583148 |
| ENSMUSG00000029003 | Mad2l2   | 0.032036697  | 0.706347999 | 0.874905116 |
| ENSMUSG00000033365 | Ipo13    | -0.032478677 | 0.706334691 | 0.874905116 |
| ENSMUSG00000039031 | Arhgap18 | 0.033306059  | 0.706304239 | 0.874905116 |
| ENSMUSG00000028191 | Bcl10    | 0.03198784   | 0.70649784  | 0.875003456 |
| ENSMUSG00000104218 | Gm9134   | 0.007299287  | 0.706570698 | 0.875006445 |
| ENSMUSG00000020246 | Hcfc2    | -0.032741794 | 0.706667252 | 0.875032663 |
| ENSMUSG00000027562 | Car2     | 0.031555022  | 0.706803213 | 0.875032663 |
| ENSMUSG00000060733 | Ipmk     | -0.032632357 | 0.706763708 | 0.875032663 |
| ENSMUSG00000024571 | Gm16286  | -0.032482165 | 0.707010795 | 0.875038501 |
| ENSMUSG00000028644 | Ermap    | -0.016199118 | 0.707230618 | 0.875038501 |
| ENSMUSG00000032872 | Cyb5r4   | 0.03127928   | 0.707174471 | 0.875038501 |
| ENSMUSG00000036192 | Rorb     | 0.032714793  | 0.707199777 | 0.875038501 |
| ENSMUSG00000063698 | Sfxn4    | -0.030111197 | 0.706962942 | 0.875038501 |
| ENSMUSG00000069520 | Tmem19   | 0.033011099  | 0.707077709 | 0.875038501 |
| ENSMUSG00000034610 | Tut4     | 0.033353302  | 0.707436894 | 0.875119377 |
| ENSMUSG00000061755 | Bod1l    | -0.031832254 | 0.707425273 | 0.875119377 |
| ENSMUSG00000022099 | Dmtn     | 0.020294097  | 0.707686322 | 0.87534075  |
| ENSMUSG00000018040 | Rrp7a    | -0.032973699 | 0.707824893 | 0.875424972 |
| ENSMUSG00000020288 | Ahsa2    | -0.031443939 | 0.708275326 | 0.875720469 |
| ENSMUSG00000031511 | Arhgef7  | 0.031950417  | 0.708215046 | 0.875720469 |
| ENSMUSG00000085917 | Gm15899  | -0.031706151 | 0.708161495 | 0.875720469 |
| ENSMUSG00000026767 | Mindy3   | 0.038548785  | 0.708374188 | 0.875755528 |
| ENSMUSG00000001472 | Tcf25    | -0.031979641 | 0.708928172 | 0.875864256 |
| ENSMUSG00000012640 | Zfp715   | -0.028125386 | 0.708932411 | 0.875864256 |
| ENSMUSG00000026078 | Pdcl3    | 0.030218471  | 0.708770276 | 0.875864256 |
| ENSMUSG00000027611 | Procr    | -0.018887177 | 0.708563556 | 0.875864256 |
| ENSMUSG00000033228 | Scaf11   | -0.032556542 | 0.708639175 | 0.875864256 |
| ENSMUSG00000049823 | Zbtb12   | -0.018597397 | 0.708774078 | 0.875864256 |
| ENSMUSG00000118332 | Fam220a  | 0.028035191  | 0.708955739 | 0.875864256 |
| ENSMUSG00000032815 | Fanca    | -0.031998768 | 0.709196644 | 0.876027569 |
| ENSMUSG00000047394 | Odf3b    | -0.017962571 | 0.709228986 | 0.876027569 |
| ENSMUSG00000033952 | Aspm     | -0.031521619 | 0.709355817 | 0.876097107 |
| ENSMUSG00000030590 | Fam98c   | 0.033119177  | 0.709499727 | 0.876187722 |
| ENSMUSG00000002343 | Armc6    | 0.028801051  | 0.710457812 | 0.876295734 |
| ENSMUSG00000005982 | Naa60    | -0.032025563 | 0.71014237  | 0.876295734 |
| ENSMUSG00000017146 | Brca1    | -0.031391481 | 0.710240216 | 0.876295734 |

|                    |               |              |             |             |
|--------------------|---------------|--------------|-------------|-------------|
| ENSMUSG00000022940 | Pigp          | 0.032686779  | 0.710323772 | 0.876295734 |
| ENSMUSG00000024213 | Nudt3         | 0.032678559  | 0.709911669 | 0.876295734 |
| ENSMUSG00000026496 | Parp1         | 0.027343366  | 0.709880847 | 0.876295734 |
| ENSMUSG00000039449 | Prpf18        | -0.03186353  | 0.710447757 | 0.876295734 |
| ENSMUSG00000040263 | Klhdc4        | -0.032447773 | 0.71045333  | 0.876295734 |
| ENSMUSG00000040945 | Rcc2          | 0.031490039  | 0.710416767 | 0.876295734 |
| ENSMUSG00000042447 | Mios          | 0.031300377  | 0.709741846 | 0.876295734 |
| ENSMUSG00000048677 | Tpcn2         | -0.027238444 | 0.710504335 | 0.876295734 |
| ENSMUSG00000049891 | Gm7984        | -0.032682907 | 0.70972768  | 0.876295734 |
| ENSMUSG00000057531 | Dtnbp1        | 0.033128449  | 0.71012301  | 0.876295734 |
| ENSMUSG00000064307 | Lrrc51        | 0.024891961  | 0.711264735 | 0.877146472 |
| ENSMUSG00000051811 | Cox6b2        | -0.032333692 | 0.711442753 | 0.877278907 |
| ENSMUSG00000067071 | Hes6          | -0.039177972 | 0.711612995 | 0.877401728 |
| ENSMUSG00000021176 | Efcab11       | -0.032036714 | 0.711826984 | 0.877491362 |
| ENSMUSG00000078995 | Zfp456        | -0.01541293  | 0.71182378  | 0.877491362 |
| ENSMUSG00000020747 | Tmem94        | 0.025179708  | 0.71213903  | 0.877788914 |
| ENSMUSG00000025060 | Slk           | -0.028535079 | 0.712393724 | 0.878015721 |
| ENSMUSG00000073386 | 9830107B12Rik | -0.024129214 | 0.712851902 | 0.878493251 |
| ENSMUSG00000095545 | Zfp969        | -0.028957183 | 0.713032727 | 0.878541762 |
| ENSMUSG00000106715 | Tmem265       | -0.022872735 | 0.713003096 | 0.878541762 |
| ENSMUSG00000044201 | Cdc25c        | 0.031602315  | 0.713384065 | 0.87888747  |
| ENSMUSG00000026581 | Sell          | 0.032626954  | 0.713800809 | 0.87896499  |
| ENSMUSG00000039988 | Ankrd13c      | 0.032159914  | 0.713608573 | 0.87896499  |
| ENSMUSG00000050538 | B230217C12Rik | 0.026877929  | 0.713662059 | 0.87896499  |
| ENSMUSG00000055917 | Zfp277        | 0.030165278  | 0.713714862 | 0.87896499  |
| ENSMUSG00000089996 | Tmsb15b2      | 0.031444853  | 0.713774098 | 0.87896499  |
| ENSMUSG00000030942 | Thumpd1       | 0.032332465  | 0.714021972 | 0.878976728 |
| ENSMUSG00000033257 | Ttll4         | -0.030844925 | 0.714012575 | 0.878976728 |
| ENSMUSG00000059540 | Tcea2         | -0.030333901 | 0.714022638 | 0.878976728 |
| ENSMUSG00000030934 | Oat           | -0.025838603 | 0.714178692 | 0.87908171  |
| ENSMUSG00000004069 | Dnaja3        | -0.028917542 | 0.714368319 | 0.879140879 |
| ENSMUSG00000028284 | Map3k7        | -0.031731796 | 0.714317164 | 0.879140879 |
| ENSMUSG00000022488 | Nckap1l       | -0.031475499 | 0.714442331 | 0.879144858 |
| ENSMUSG00000108528 | Gm8319        | 0.019494883  | 0.714515042 | 0.879147235 |
| ENSMUSG00000027652 | Ralgapb       | 0.023154014  | 0.714853403 | 0.879476438 |
| ENSMUSG00000006398 | Cdc20         | -0.030725217 | 0.714965541 | 0.879502822 |
| ENSMUSG00000047669 | Msl3l2        | 0.032284148  | 0.715016464 | 0.879502822 |
| ENSMUSG00000054008 | Ndst1         | 0.028223015  | 0.715203142 | 0.879645334 |
| ENSMUSG00000028085 | Gatb          | -0.03193464  | 0.71567315  | 0.880027677 |
| ENSMUSG00000031786 | Drc7          | 0.024716978  | 0.71572656  | 0.880027677 |
| ENSMUSG00000074580 | 4931440P22Rik | 0.026235242  | 0.71562765  | 0.880027677 |
| ENSMUSG00000002205 | Vrk3          | -0.031667601 | 0.716236372 | 0.880040375 |
| ENSMUSG00000005299 | Letm1         | -0.027004902 | 0.71633672  | 0.880040375 |

|                    |               |              |             |             |
|--------------------|---------------|--------------|-------------|-------------|
| ENSMUSG00000014778 | Fhod1         | 0.017792108  | 0.716305187 | 0.880040375 |
| ENSMUSG00000018861 | Fdxr          | -0.029659835 | 0.716428568 | 0.880040375 |
| ENSMUSG00000021774 | Ube2e1        | -0.031638758 | 0.715922232 | 0.880040375 |
| ENSMUSG00000024998 | Plce1         | -0.019849816 | 0.716351916 | 0.880040375 |
| ENSMUSG00000027620 | Rbm39         | -0.033022736 | 0.716587099 | 0.880040375 |
| ENSMUSG00000058013 | Sept11        | 0.03224953   | 0.71648682  | 0.880040375 |
| ENSMUSG00000063268 | Parp10        | 0.028968172  | 0.715995972 | 0.880040375 |
| ENSMUSG00000079020 | Slc45a4       | 0.02183106   | 0.716518892 | 0.880040375 |
| ENSMUSG00000083820 | Ndufs6b       | 0.014781637  | 0.716507213 | 0.880040375 |
| ENSMUSG00000112226 | Gm48786       | 0.016124615  | 0.716235436 | 0.880040375 |
| ENSMUSG00000021840 | Mapk1ip1l     | 0.03182429   | 0.716770148 | 0.88015923  |
| ENSMUSG00000057123 | Gja5          | 0.017658476  | 0.716825599 | 0.88015923  |
| ENSMUSG00000046138 | 9930021J03Rik | 0.028539196  | 0.717023946 | 0.880315749 |
| ENSMUSG00000023367 | Tmem176a      | -0.028673609 | 0.71744739  | 0.880661531 |
| ENSMUSG00000117607 | AC158772.1    | 0.017187181  | 0.717394199 | 0.880661531 |
| ENSMUSG00000061758 | Akr1b10       | -0.030413575 | 0.71771664  | 0.880817941 |
| ENSMUSG00000063873 | Slc24a3       | -0.019755614 | 0.717650579 | 0.880817941 |
| ENSMUSG00000037730 | Mynn          | -0.029812815 | 0.717906152 | 0.880891815 |
| ENSMUSG00000056050 | Mia3          | -0.031646659 | 0.717918674 | 0.880891815 |
| ENSMUSG00000036430 | Tbcc          | -0.031649455 | 0.718102691 | 0.881030573 |
| ENSMUSG00000040564 | Apoc1         | -0.017975534 | 0.718182162 | 0.881041051 |
| ENSMUSG00000020807 | 4933427D14Rik | -0.027125177 | 0.718370174 | 0.881097653 |
| ENSMUSG00000101462 | Gm3052        | -0.022182433 | 0.718316987 | 0.881097653 |
| ENSMUSG00000001366 | Fbxo9         | 0.030449401  | 0.719343791 | 0.881216183 |
| ENSMUSG00000014039 | Prdm15        | 0.022949701  | 0.71926146  | 0.881216183 |
| ENSMUSG00000021468 | Sptlc1        | 0.030860764  | 0.719184415 | 0.881216183 |
| ENSMUSG00000022765 | Snap29        | 0.030587916  | 0.719082737 | 0.881216183 |
| ENSMUSG00000029390 | Tmed2         | 0.031702231  | 0.719337522 | 0.881216183 |
| ENSMUSG00000034312 | lqsec1        | 0.012134523  | 0.71893477  | 0.881216183 |
| ENSMUSG00000040751 | Lat2          | -0.03090034  | 0.719071251 | 0.881216183 |
| ENSMUSG00000040913 | Fbxw4         | -0.031476682 | 0.718639091 | 0.881216183 |
| ENSMUSG00000042404 | Dennd4b       | 0.023188057  | 0.718853935 | 0.881216183 |
| ENSMUSG00000047592 | Nxpe5         | 0.029949712  | 0.719424452 | 0.881216183 |
| ENSMUSG00000049811 | Fam161a       | 0.017551591  | 0.719226488 | 0.881216183 |
| ENSMUSG00000079227 | Ccr5          | -0.017985885 | 0.71911827  | 0.881216183 |
| ENSMUSG00000085795 | Zfp703        | -0.014468438 | 0.719331308 | 0.881216183 |
| ENSMUSG00000101262 | Gm8326        | -0.022676533 | 0.719460053 | 0.881216183 |
| ENSMUSG00000030557 | Mef2a         | -0.031532998 | 0.719579817 | 0.881275972 |
| ENSMUSG00000070730 | Rmdn3         | 0.031814413  | 0.719673355 | 0.881303632 |
| ENSMUSG00000022668 | Gtpbp8        | 0.031211236  | 0.719915714 | 0.881513514 |
| ENSMUSG00000023022 | Lima1         | -0.020677263 | 0.72007215  | 0.881531261 |
| ENSMUSG00000038733 | Wdr26         | 0.031033454  | 0.720048048 | 0.881531261 |
| ENSMUSG00000014850 | Msh3          | 0.030516648  | 0.720649247 | 0.881542981 |

|                    |         |              |             |             |
|--------------------|---------|--------------|-------------|-------------|
| ENSMUSG00000015134 | Aldh1a3 | -0.026439104 | 0.720429094 | 0.881542981 |
| ENSMUSG00000021366 | Hivep1  | 0.023553622  | 0.720591918 | 0.881542981 |
| ENSMUSG00000025280 | Polr3a  | -0.026193301 | 0.7207855   | 0.881542981 |
| ENSMUSG00000037503 | Fam168b | 0.030955628  | 0.720749555 | 0.881542981 |
| ENSMUSG00000039828 | Wdr70   | 0.028908508  | 0.720721834 | 0.881542981 |
| ENSMUSG00000041733 | Coq5    | -0.030327875 | 0.720358635 | 0.881542981 |
| ENSMUSG00000044949 | Ubt2    | -0.024251353 | 0.720791443 | 0.881542981 |
| ENSMUSG00000051003 | Olfr161 | 0.017393644  | 0.720511872 | 0.881542981 |
| ENSMUSG00000090015 | Gm15446 | 0.029939938  | 0.720410881 | 0.881542981 |
| ENSMUSG00000049098 | Olfr147 | 0.016798596  | 0.72086922  | 0.881551302 |
| ENSMUSG00000044080 | S100a1  | -0.031312769 | 0.721071176 | 0.881711466 |
| ENSMUSG00000053897 | Slc39a8 | 0.030052768  | 0.721219306 | 0.881805787 |
| ENSMUSG00000059423 | Zfp933  | 0.028027168  | 0.721303322 | 0.881821708 |
| ENSMUSG00000028106 | Rprd2   | -0.028262366 | 0.721636684 | 0.881865017 |
| ENSMUSG00000030213 | Atf7ip  | -0.029916258 | 0.721537727 | 0.881865017 |
| ENSMUSG00000036368 | Rmdn2   | -0.023149484 | 0.721597361 | 0.881865017 |
| ENSMUSG00000051346 | Spryd4  | 0.030569827  | 0.721693737 | 0.881865017 |
| ENSMUSG00000113388 | Gm48111 | 0.003052018  | 0.721424307 | 0.881865017 |
| ENSMUSG00000022090 | Pdlim2  | -0.030877657 | 0.721910215 | 0.881975452 |
| ENSMUSG00000061815 | Rufy4   | 0.021435644  | 0.722007666 | 0.881975452 |
| ENSMUSG00000070520 | Nsmce3  | 0.030759539  | 0.722068141 | 0.881975452 |
| ENSMUSG00000075284 | Wipf1   | 0.027762922  | 0.721929475 | 0.881975452 |
| ENSMUSG00000013622 | Atraid  | 0.029944152  | 0.724122217 | 0.882320875 |
| ENSMUSG00000016541 | Atxn10  | 0.030713137  | 0.723240417 | 0.882320875 |
| ENSMUSG00000016933 | Plcg1   | -0.024211936 | 0.724336921 | 0.882320875 |
| ENSMUSG00000017652 | Cd40    | -0.011963913 | 0.724546688 | 0.882320875 |
| ENSMUSG00000020098 | Pcbd1   | 0.029183204  | 0.723416445 | 0.882320875 |
| ENSMUSG00000021731 | Mrps30  | 0.031503527  | 0.724344794 | 0.882320875 |
| ENSMUSG00000022263 | Trio    | -0.023107608 | 0.724436266 | 0.882320875 |
| ENSMUSG00000022472 | Desi1   | -0.031202215 | 0.722459474 | 0.882320875 |
| ENSMUSG00000022571 | Pycrl   | 0.030386003  | 0.723317689 | 0.882320875 |
| ENSMUSG00000024371 | C2      | -0.023091768 | 0.723032109 | 0.882320875 |
| ENSMUSG00000025010 | Ccnj    | 0.004289599  | 0.723989198 | 0.882320875 |
| ENSMUSG00000027304 | Rtf1    | 0.030105512  | 0.723774892 | 0.882320875 |
| ENSMUSG00000027699 | Ect2    | -0.028698113 | 0.723566768 | 0.882320875 |
| ENSMUSG00000027782 | Kpna4   | 0.030789868  | 0.724695078 | 0.882320875 |
| ENSMUSG00000029919 | Hpgds   | 0.018151571  | 0.723185786 | 0.882320875 |
| ENSMUSG00000030232 | Aebp2   | -0.030997286 | 0.724119262 | 0.882320875 |
| ENSMUSG00000032352 | Lrrc1   | -0.026935155 | 0.723015904 | 0.882320875 |
| ENSMUSG00000035024 | Ncapd3  | -0.029240468 | 0.72373959  | 0.882320875 |
| ENSMUSG00000036568 | Bicral  | 0.017641311  | 0.724384099 | 0.882320875 |
| ENSMUSG00000038679 | Trps1   | 0.022796579  | 0.723384192 | 0.882320875 |
| ENSMUSG00000038879 | Nipal2  | 0.015728822  | 0.723687233 | 0.882320875 |

|                    |               |              |             |             |
|--------------------|---------------|--------------|-------------|-------------|
| ENSMUSG00000040446 | Rprd1a        | -0.03114043  | 0.722723254 | 0.882320875 |
| ENSMUSG00000042745 | ld1           | -0.0310493   | 0.723590766 | 0.882320875 |
| ENSMUSG00000049550 | Clip1         | -0.028692745 | 0.723898569 | 0.882320875 |
| ENSMUSG00000052253 | Zfp622        | 0.029658906  | 0.724337644 | 0.882320875 |
| ENSMUSG00000073062 | Zxdb          | -0.021220397 | 0.724645674 | 0.882320875 |
| ENSMUSG00000074570 | Cass4         | 0.019433677  | 0.723395531 | 0.882320875 |
| ENSMUSG00000079469 | Pigb          | -0.030715353 | 0.72457781  | 0.882320875 |
| ENSMUSG00000079553 | Kifc1         | 0.021016213  | 0.723842643 | 0.882320875 |
| ENSMUSG00000082110 | Gm11196       | 0.008848203  | 0.723614865 | 0.882320875 |
| ENSMUSG00000100033 | Gm8337        | -0.021555965 | 0.72419857  | 0.882320875 |
| ENSMUSG00000108314 | Prkcz2        | 0.020433808  | 0.722624279 | 0.882320875 |
| ENSMUSG00000112972 | Gm48417       | 0.003020117  | 0.722720985 | 0.882320875 |
| ENSMUSG00000020088 | Sar1a         | 0.029567436  | 0.72497844  | 0.88234413  |
| ENSMUSG00000029467 | Atp2a2        | 0.03124894   | 0.724898906 | 0.88234413  |
| ENSMUSG00000035696 | Rnf38         | -0.018323554 | 0.724998325 | 0.88234413  |
| ENSMUSG00000054309 | Cpsf3         | 0.026908303  | 0.724926469 | 0.88234413  |
| ENSMUSG00000028470 | Hint2         | 0.031182287  | 0.7254235   | 0.882688607 |
| ENSMUSG00000089698 | Gm2541        | 0.02799051   | 0.725408138 | 0.882688607 |
| ENSMUSG00000093989 | Rnasek        | 0.025560215  | 0.725570619 | 0.882781141 |
| ENSMUSG00000003662 | Ciao1         | 0.029263343  | 0.725825326 | 0.882841942 |
| ENSMUSG00000024590 | Lmnbl1        | -0.029315503 | 0.72572654  | 0.882841942 |
| ENSMUSG00000044636 | Csrnp2        | -0.020476495 | 0.726014146 | 0.882841942 |
| ENSMUSG00000078184 | Rbm8a2        | -0.013040185 | 0.725950368 | 0.882841942 |
| ENSMUSG00000094747 | Olfr1307      | -0.022807707 | 0.726047052 | 0.882841942 |
| ENSMUSG00000117748 | Chtf8         | -0.002613086 | 0.726032662 | 0.882841942 |
| ENSMUSG00000038240 | Pdss2         | 0.02991517   | 0.726256898 | 0.882985279 |
| ENSMUSG00000059461 | Gm7331        | 0.008940143  | 0.726307108 | 0.882985279 |
| ENSMUSG00000035062 | Zc4h2         | 0.03107166   | 0.726398416 | 0.883009857 |
| ENSMUSG00000114763 | Gm49354       | -0.020253818 | 0.726477723 | 0.883019845 |
| ENSMUSG00000030754 | Copb1         | -0.02617724  | 0.726716227 | 0.883050505 |
| ENSMUSG00000031666 | Rbl2          | -0.028436312 | 0.726711801 | 0.883050505 |
| ENSMUSG00000060538 | Tmem219       | 0.031088346  | 0.726597506 | 0.883050505 |
| ENSMUSG00000025509 | Pnpla2        | -0.030537359 | 0.726865411 | 0.883145384 |
| ENSMUSG00000024369 | Nelfe         | 0.02879084   | 0.72705878  | 0.883207541 |
| ENSMUSG00000054893 | Zfp667        | -0.028243832 | 0.726996776 | 0.883207541 |
| ENSMUSG00000029798 | Herc6         | -0.027077173 | 0.727197503 | 0.883289672 |
| ENSMUSG00000052906 | Ubxn8         | -0.029589953 | 0.727430722 | 0.883486555 |
| ENSMUSG00000027394 | Ttl           | 0.025421362  | 0.727605902 | 0.883612917 |
| ENSMUSG00000014444 | Piezo1        | 0.023477051  | 0.72771173  | 0.88365504  |
| ENSMUSG00000020553 | Pctp          | -0.030138802 | 0.728029834 | 0.883890023 |
| ENSMUSG00000046785 | Epm2aip1      | -0.024908808 | 0.728047567 | 0.883890023 |
| ENSMUSG00000032468 | Armc8         | -0.03036247  | 0.728183505 | 0.883968658 |
| ENSMUSG00000071796 | 6820431F20Rik | -0.030184112 | 0.728349156 | 0.88400124  |

|                    |               |              |             |             |
|--------------------|---------------|--------------|-------------|-------------|
| ENSMUSG00000094520 | Olfrc635      | 0.022231584  | 0.728379441 | 0.88400124  |
| ENSMUSG00000103318 | Gm38356       | -0.016427404 | 0.728423854 | 0.88400124  |
| ENSMUSG00000026389 | Steap3        | -0.030163814 | 0.728540585 | 0.884019441 |
| ENSMUSG00000035171 | 1110059E24Rik | -0.027887477 | 0.72862773  | 0.884019441 |
| ENSMUSG00000063628 | Gm7665        | 0.012308449  | 0.728652366 | 0.884019441 |
| ENSMUSG00000021281 | Tnfaip2       | 0.028946073  | 0.728909501 | 0.884245035 |
| ENSMUSG00000034187 | Nsf           | -0.029137753 | 0.728988253 | 0.884254208 |
| ENSMUSG00000020311 | Erlec1        | 0.024852627  | 0.729070151 | 0.884267195 |
| ENSMUSG00000027006 | Dnajc10       | 0.030231838  | 0.729394988 | 0.884315778 |
| ENSMUSG00000040904 | Gm21988       | -0.027192854 | 0.72938751  | 0.884315778 |
| ENSMUSG00000052456 | Asna1         | 0.0311021    | 0.729261201 | 0.884315778 |
| ENSMUSG00000108352 | Usf2-ps1      | -0.020022449 | 0.729292152 | 0.884315778 |
| ENSMUSG00000029490 | Mfsd7a        | -0.026890458 | 0.729894342 | 0.884640743 |
| ENSMUSG00000030286 | Emc3          | 0.02662595   | 0.729947909 | 0.884640743 |
| ENSMUSG00000036768 | Kif15         | 0.030655     | 0.729838226 | 0.884640743 |
| ENSMUSG00000038742 | Angptl6       | -0.029758879 | 0.729867408 | 0.884640743 |
| ENSMUSG00000047044 | D030056L22Rik | 0.029970827  | 0.730302467 | 0.884984092 |
| ENSMUSG00000074521 | Gm14327       | -0.005816317 | 0.730384663 | 0.884997357 |
| ENSMUSG00000112013 | Gm47967       | 0.016157577  | 0.730508592 | 0.88506118  |
| ENSMUSG00000035851 | Ythdc1        | 0.030021708  | 0.730786192 | 0.885224819 |
| ENSMUSG00000095186 | Gm10718       | -0.009290609 | 0.730761126 | 0.885224819 |
| ENSMUSG00000044408 | Sptssa        | 0.028576813  | 0.730960729 | 0.885269887 |
| ENSMUSG00000046432 | Bex3          | -0.025114891 | 0.730965942 | 0.885269887 |
| ENSMUSG00000006527 | Sfmbt1        | 0.030289948  | 0.73111462  | 0.885363625 |
| ENSMUSG00000004668 | Abca13        | -0.014813979 | 0.731236444 | 0.885424826 |
| ENSMUSG00000028528 | Dnajc6        | 0.013551345  | 0.731564339 | 0.885735515 |
| ENSMUSG00000115598 | Gm9290        | 0.018940231  | 0.731736075 | 0.885857094 |
| ENSMUSG00000038000 | Acd           | -0.033794702 | 0.731907166 | 0.885977868 |
| ENSMUSG00000009293 | Ube2g2        | -0.026883139 | 0.732254645 | 0.886312117 |
| ENSMUSG00000031774 | Fam192a       | -0.029892312 | 0.732343934 | 0.886333821 |
| ENSMUSG00000048905 | 4930539E08Rik | 0.014027234  | 0.732559233 | 0.886508012 |
| ENSMUSG00000009030 | Pdcl          | 0.029557398  | 0.732904362 | 0.886752882 |
| ENSMUSG00000037029 | Zfp146        | 0.02727212   | 0.73287282  | 0.886752882 |
| ENSMUSG00000036890 | Gtdc1         | -0.024664003 | 0.733017703 | 0.886803632 |
| ENSMUSG00000002768 | Mea1          | 0.028519894  | 0.733262534 | 0.886932879 |
| ENSMUSG00000024726 | Carnmt1       | 0.028577932  | 0.733267348 | 0.886932879 |
| ENSMUSG00000018322 | Tommm34       | 0.027741429  | 0.733414488 | 0.887001546 |
| ENSMUSG00000061479 | Snrpa         | 0.030320073  | 0.733466942 | 0.887001546 |
| ENSMUSG00000047583 | Tyw3          | -0.02963081  | 0.73370411  | 0.887201982 |
| ENSMUSG00000037949 | Ano10         | 0.028206548  | 0.733900635 | 0.887353236 |
| ENSMUSG00000019826 | Zbtb24        | -0.02987195  | 0.734747037 | 0.887379584 |
| ENSMUSG00000028645 | Slc2a1        | 0.028520112  | 0.734048007 | 0.887379584 |
| ENSMUSG00000030872 | Gga2          | 0.028979593  | 0.734307311 | 0.887379584 |

|                    |               |              |             |             |
|--------------------|---------------|--------------|-------------|-------------|
| ENSMUSG00000033735 | Spr           | 0.029423622  | 0.734707544 | 0.887379584 |
| ENSMUSG00000034757 | Tmub2         | -0.029602401 | 0.734563124 | 0.887379584 |
| ENSMUSG00000037434 | Slc30a1       | -0.026790487 | 0.734768197 | 0.887379584 |
| ENSMUSG00000047547 | Cltb          | 0.026822408  | 0.734153493 | 0.887379584 |
| ENSMUSG00000048612 | Myof          | -0.009467788 | 0.734091932 | 0.887379584 |
| ENSMUSG00000051768 | Xrcc1         | -0.029978473 | 0.734779729 | 0.887379584 |
| ENSMUSG00000063286 | Gm8995        | 0.027404396  | 0.734636964 | 0.887379584 |
| ENSMUSG00000090247 | Bloc1s1       | 0.02877213   | 0.734297188 | 0.887379584 |
| ENSMUSG00000091831 | Gm4707        | -0.016414804 | 0.734574302 | 0.887379584 |
| ENSMUSG0000004626  | Stxbp2        | -0.028450473 | 0.735137486 | 0.887552752 |
| ENSMUSG00000025141 | Myadml2       | -0.017320041 | 0.73505358  | 0.887552752 |
| ENSMUSG00000069539 | Scyl2         | -0.025936993 | 0.735115542 | 0.887552752 |
| ENSMUSG00000037938 | Chchd5        | 0.028835945  | 0.735270408 | 0.887584063 |
| ENSMUSG00000054408 | Spcs3         | 0.027195958  | 0.735306336 | 0.887584063 |
| ENSMUSG00000026812 | Tsc1          | -0.028532575 | 0.735379661 | 0.887586315 |
| ENSMUSG00000017548 | Suz12         | -0.029274987 | 0.735578219 | 0.887611914 |
| ENSMUSG00000019806 | Aig1          | 0.02921106   | 0.735615251 | 0.887611914 |
| ENSMUSG00000037316 | Bag4          | 0.029802325  | 0.735575372 | 0.887611914 |
| ENSMUSG00000026333 | Gin1          | 0.02834762   | 0.735741862 | 0.887678452 |
| ENSMUSG00000001151 | Pcnt          | -0.029572386 | 0.735962509 | 0.887792506 |
| ENSMUSG00000061118 | Dnajc30       | -0.029574227 | 0.735979344 | 0.887792506 |
| ENSMUSG00000030498 | Gas2          | 0.027347684  | 0.736298432 | 0.887918721 |
| ENSMUSG00000073176 | Zfp449        | -0.022353984 | 0.736271568 | 0.887918721 |
| ENSMUSG00000074682 | Zcchc3        | -0.028890626 | 0.736203036 | 0.887918721 |
| ENSMUSG00000028675 | Pnrc2         | -0.028812126 | 0.736454053 | 0.888020172 |
| ENSMUSG00000052539 | Magi3         | -0.024601794 | 0.736637755 | 0.888069257 |
| ENSMUSG00000054612 | Mgmt          | 0.029147778  | 0.736623205 | 0.888069257 |
| ENSMUSG00000009555 | Cdk9          | -0.029973147 | 0.737077008 | 0.888439754 |
| ENSMUSG00000042766 | Trim46        | -0.020834973 | 0.737159657 | 0.888439754 |
| ENSMUSG00000053168 | 9030619P08Rik | 0.024622499  | 0.737125119 | 0.888439754 |
| ENSMUSG00000003235 | Eif2b5        | 0.027540596  | 0.737708434 | 0.888553156 |
| ENSMUSG00000022864 | D16Ertd472e   | 0.030030795  | 0.737721165 | 0.888553156 |
| ENSMUSG00000025006 | Sorbs1        | -0.014721652 | 0.737879562 | 0.888553156 |
| ENSMUSG00000027427 | Polr3f        | 0.028019782  | 0.737843396 | 0.888553156 |
| ENSMUSG00000028218 | Fam92a        | 0.029031816  | 0.737672409 | 0.888553156 |
| ENSMUSG00000038538 | Ubn2          | 0.029119931  | 0.737909701 | 0.888553156 |
| ENSMUSG00000044702 | Palb2         | -0.028628981 | 0.738112186 | 0.888553156 |
| ENSMUSG00000051451 | Crebzf        | -0.029158239 | 0.738077617 | 0.888553156 |
| ENSMUSG00000064354 | mt-Co2        | 0.015892753  | 0.737392279 | 0.888553156 |
| ENSMUSG00000076432 | Ywhaq         | 0.024566988  | 0.737752303 | 0.888553156 |
| ENSMUSG00000111023 | Gm48391       | 0.016045277  | 0.738002138 | 0.888553156 |
| ENSMUSG00000114254 | Gm48067       | -0.022780678 | 0.737850574 | 0.888553156 |
| ENSMUSG00000003778 | Brd8          | -0.025505144 | 0.738598212 | 0.888647754 |

|                    |               |              |             |             |
|--------------------|---------------|--------------|-------------|-------------|
| ENSMUSG00000028273 | Pdlim5        | -0.029020457 | 0.738441081 | 0.888647754 |
| ENSMUSG00000031691 | Tnpo2         | -0.022372017 | 0.738809091 | 0.888647754 |
| ENSMUSG00000035041 | Creb3l3       | -0.024570849 | 0.738577962 | 0.888647754 |
| ENSMUSG00000045140 | Pigw          | -0.023930357 | 0.738383987 | 0.888647754 |
| ENSMUSG00000055681 | Cope          | 0.028563963  | 0.73873044  | 0.888647754 |
| ENSMUSG00000063383 | Zfp947        | 0.025844601  | 0.738906207 | 0.888647754 |
| ENSMUSG00000064145 | Arih2         | 0.029450264  | 0.738442195 | 0.888647754 |
| ENSMUSG00000081137 | BC022960      | -0.019188979 | 0.73882622  | 0.888647754 |
| ENSMUSG00000111917 | Gm48793       | 0.020874263  | 0.738859937 | 0.888647754 |
| ENSMUSG00000109493 | Gm45208       | 0.019617258  | 0.739352917 | 0.889098904 |
| ENSMUSG00000033282 | Rpgrip1l      | -0.026518702 | 0.739470054 | 0.889153682 |
| ENSMUSG00000030522 | Mtmr10        | -0.017020682 | 0.739555222 | 0.889170014 |
| ENSMUSG00000042605 | Atxn2         | -0.025605791 | 0.739776192 | 0.889177481 |
| ENSMUSG00000057132 | Rpgrip1       | -0.014043451 | 0.739763807 | 0.889177481 |
| ENSMUSG00000081769 | Gm12216       | 0.019085195  | 0.73970034  | 0.889177481 |
| ENSMUSG00000031540 | Kat6a         | 0.023711753  | 0.739929985 | 0.889190243 |
| ENSMUSG00000091732 | Gm17541       | 0.015748579  | 0.739884233 | 0.889190243 |
| ENSMUSG00000046442 | Ppm1e         | -0.016234156 | 0.740127626 | 0.889255683 |
| ENSMUSG00000070034 | Sp110         | -0.023352682 | 0.7400949   | 0.889255683 |
| ENSMUSG00000024542 | Cep192        | 0.02790625   | 0.740275968 | 0.889347887 |
| ENSMUSG00000044816 | D630023F18Rik | -0.021585041 | 0.740416681 | 0.889430908 |
| ENSMUSG00000022503 | Nubp1         | 0.030559876  | 0.740912834 | 0.889854797 |
| ENSMUSG00000074221 | Zfp568        | -0.023435243 | 0.740858734 | 0.889854797 |
| ENSMUSG00000024246 | Thumpd2       | -0.028724387 | 0.741382201 | 0.890027769 |
| ENSMUSG00000030801 | Kat8          | -0.028934962 | 0.74126298  | 0.890027769 |
| ENSMUSG00000036285 | Noa1          | -0.029109316 | 0.741181612 | 0.890027769 |
| ENSMUSG00000054676 | 1600014C10Rik | 0.027205349  | 0.741415129 | 0.890027769 |
| ENSMUSG00000085642 | 3110053B16Rik | -0.017069426 | 0.741337195 | 0.890027769 |
| ENSMUSG00000024511 | Rab27b        | -0.015485564 | 0.741507189 | 0.890052261 |
| ENSMUSG00000047875 | Gpr157        | -0.023992918 | 0.741626384 | 0.890109316 |
| ENSMUSG00000035298 | Klhl35        | -0.012646639 | 0.742105135 | 0.890441743 |
| ENSMUSG00000041012 | Cmtm8         | 0.023296525  | 0.742118422 | 0.890441743 |
| ENSMUSG00000098134 | Rnf113a2      | -0.026008532 | 0.742023036 | 0.890441743 |
| ENSMUSG00000032373 | Car12         | -0.026727365 | 0.742402735 | 0.890696838 |
| ENSMUSG00000018476 | Kdm6b         | 0.013052604  | 0.742666287 | 0.890903726 |
| ENSMUSG00000019790 | Stxbp5        | -0.022625067 | 0.742718628 | 0.890903726 |
| ENSMUSG00000021067 | Sav1          | 0.029044823  | 0.743193898 | 0.891387738 |
| ENSMUSG00000078183 | Gm15610       | 0.028772109  | 0.743362993 | 0.891504465 |
| ENSMUSG00000015316 | Slamf1        | -0.01403313  | 0.74371207  | 0.891750905 |
| ENSMUSG00000033014 | Trim33        | 0.022332061  | 0.743668489 | 0.891750905 |
| ENSMUSG00000021277 | Traf3         | 0.035136476  | 0.743896415 | 0.891829646 |
| ENSMUSG00000022555 | Dgat1         | 0.028692651  | 0.744209802 | 0.891829646 |
| ENSMUSG00000024853 | Sf3b2         | -0.024737683 | 0.744211884 | 0.891829646 |

|                    |           |              |             |             |
|--------------------|-----------|--------------|-------------|-------------|
| ENSMUSG00000027508 | Pag1      | 0.01692196   | 0.744216099 | 0.891829646 |
| ENSMUSG00000028223 | Decr1     | 0.028223318  | 0.744342865 | 0.891829646 |
| ENSMUSG00000029406 | Pitpnm2   | 0.020921952  | 0.744168042 | 0.891829646 |
| ENSMUSG00000031995 | St14      | -0.021117616 | 0.744281258 | 0.891829646 |
| ENSMUSG00000069910 | Spdl1     | -0.027838452 | 0.744423941 | 0.891829646 |
| ENSMUSG00000079427 | Mthfsl    | 0.028579352  | 0.744395863 | 0.891829646 |
| ENSMUSG00000046101 | Mcmdc2    | 0.013291898  | 0.744597093 | 0.891951056 |
| ENSMUSG00000036023 | Parp2     | -0.027100002 | 0.744674215 | 0.891957418 |
| ENSMUSG00000028789 | Azin2     | 0.020454945  | 0.744823615 | 0.891964339 |
| ENSMUSG00000029504 | Ddx51     | -0.028250188 | 0.744819778 | 0.891964339 |
| ENSMUSG00000007411 | Mark3     | -0.027771231 | 0.745060248 | 0.89199786  |
| ENSMUSG00000039182 | AW209491  | -0.028308963 | 0.745065488 | 0.89199786  |
| ENSMUSG00000051817 | Sox12     | -0.019436852 | 0.745067047 | 0.89199786  |
| ENSMUSG00000055991 | Zkscan5   | -0.019610559 | 0.745153872 | 0.892015829 |
| ENSMUSG00000022272 | Myo10     | 0.018591754  | 0.745241057 | 0.892034227 |
| ENSMUSG00000037262 | Kin       | 0.028363143  | 0.745320822 | 0.892043739 |
| ENSMUSG00000030103 | Bhlhe40   | 0.022137704  | 0.745505254 | 0.892136251 |
| ENSMUSG00000038463 | Olfml2b   | 0.015091525  | 0.745541767 | 0.892136251 |
| ENSMUSG00000033526 | Ppip5k1   | -0.028478676 | 0.745688525 | 0.892225909 |
| ENSMUSG00000028397 | Kdm4c     | -0.010345895 | 0.745937779 | 0.892438177 |
| ENSMUSG00000021892 | Sh3bp5    | -0.023536126 | 0.746888711 | 0.892797535 |
| ENSMUSG00000026918 | Brd3      | -0.027067116 | 0.74658569  | 0.892797535 |
| ENSMUSG00000027678 | Ncoa3     | -0.02456009  | 0.746468034 | 0.892797535 |
| ENSMUSG00000031767 | Nudt7     | 0.028608412  | 0.746905883 | 0.892797535 |
| ENSMUSG00000036099 | Vezt      | -0.024231006 | 0.746823024 | 0.892797535 |
| ENSMUSG00000037210 | Fam193a   | -0.025496995 | 0.746327026 | 0.892797535 |
| ENSMUSG00000056602 | Fry       | -0.027168027 | 0.746949114 | 0.892797535 |
| ENSMUSG00000068742 | Cry2      | -0.026842134 | 0.746956927 | 0.892797535 |
| ENSMUSG00000075609 | Gm7935    | -0.026932634 | 0.746840159 | 0.892797535 |
| ENSMUSG00000101567 | Txn-ps1   | 0.013491859  | 0.746932614 | 0.892797535 |
| ENSMUSG00000029125 | Stx18     | -0.024278333 | 0.747084156 | 0.892863688 |
| ENSMUSG00000027367 | Stard7    | -0.027133338 | 0.747262333 | 0.892990709 |
| ENSMUSG00000021957 | Tkt       | 0.024191259  | 0.747448908 | 0.893052592 |
| ENSMUSG00000031950 | Gabarapl2 | 0.02577469   | 0.747457914 | 0.893052592 |
| ENSMUSG00000000282 | Mnt       | 0.022125872  | 0.747956113 | 0.893182477 |
| ENSMUSG00000006519 | Cyba      | 0.03271509   | 0.749911037 | 0.893182477 |
| ENSMUSG00000015165 | Hnrnpl    | 0.027248797  | 0.748308609 | 0.893182477 |
| ENSMUSG00000020362 | Cnot6     | 0.016996811  | 0.74900789  | 0.893182477 |
| ENSMUSG00000020412 | Ascc2     | -0.028553401 | 0.748197038 | 0.893182477 |
| ENSMUSG00000020929 | Eftud2    | 0.027216488  | 0.750586804 | 0.893182477 |
| ENSMUSG00000022184 | Fbxo4     | 0.028235959  | 0.750214981 | 0.893182477 |
| ENSMUSG00000022210 | Dhrs4     | 0.028091571  | 0.75055382  | 0.893182477 |
| ENSMUSG00000022439 | Parvg     | -0.027328082 | 0.749214628 | 0.893182477 |

|                    |               |              |             |             |
|--------------------|---------------|--------------|-------------|-------------|
| ENSMUSG00000022742 | Cpox          | -0.027683828 | 0.747834667 | 0.893182477 |
| ENSMUSG00000022753 | Tmem30c       | -0.022028087 | 0.750156061 | 0.893182477 |
| ENSMUSG00000024270 | Slc39a6       | -0.027912737 | 0.750246017 | 0.893182477 |
| ENSMUSG00000025371 | Chmp6         | 0.031640724  | 0.749224106 | 0.893182477 |
| ENSMUSG00000025702 | March8        | 0.016043045  | 0.748564828 | 0.893182477 |
| ENSMUSG00000025921 | Rdh10         | 0.026034439  | 0.749095219 | 0.893182477 |
| ENSMUSG00000026836 | Acvr1         | -0.017128554 | 0.750553539 | 0.893182477 |
| ENSMUSG00000028251 | Tstd3         | 0.027929498  | 0.750429632 | 0.893182477 |
| ENSMUSG00000028268 | Gbp3          | -0.028233165 | 0.747950937 | 0.893182477 |
| ENSMUSG00000028909 | Ptpru         | -0.019416605 | 0.750489345 | 0.893182477 |
| ENSMUSG00000030102 | Itpr1         | -0.026839757 | 0.748929504 | 0.893182477 |
| ENSMUSG00000031373 | Car5b         | -0.018572804 | 0.748995998 | 0.893182477 |
| ENSMUSG00000032398 | Snpc5         | -0.027071179 | 0.748661361 | 0.893182477 |
| ENSMUSG00000032489 | Kif9          | -0.013448201 | 0.750195792 | 0.893182477 |
| ENSMUSG00000034055 | Phka1         | -0.018716858 | 0.749603897 | 0.893182477 |
| ENSMUSG00000034157 | Cipc          | -0.024974748 | 0.747761321 | 0.893182477 |
| ENSMUSG00000035621 | Midn          | -0.014448786 | 0.748410267 | 0.893182477 |
| ENSMUSG00000035764 | Fbxo45        | 0.028141462  | 0.748717043 | 0.893182477 |
| ENSMUSG00000037446 | Tulp1         | 0.02185878   | 0.749716138 | 0.893182477 |
| ENSMUSG00000039483 | Asb6          | -0.027982757 | 0.747959106 | 0.893182477 |
| ENSMUSG00000040725 | Hnrnpul1      | -0.027427481 | 0.748974543 | 0.893182477 |
| ENSMUSG00000042272 | Sestd1        | -0.026554922 | 0.749309888 | 0.893182477 |
| ENSMUSG00000046058 | Eid2          | 0.021879047  | 0.749688771 | 0.893182477 |
| ENSMUSG00000047388 | Atmin         | 0.028125431  | 0.748189003 | 0.893182477 |
| ENSMUSG00000052749 | Trim30b       | -0.017361523 | 0.750225732 | 0.893182477 |
| ENSMUSG00000058900 | Rsl1          | -0.01604625  | 0.748688686 | 0.893182477 |
| ENSMUSG00000066682 | Pilrb2        | 0.027889664  | 0.749421585 | 0.893182477 |
| ENSMUSG00000069135 | Fgfr1op       | 0.028131025  | 0.749850113 | 0.893182477 |
| ENSMUSG00000073468 | Sft2d1        | 0.027166406  | 0.750230822 | 0.893182477 |
| ENSMUSG00000078249 | Hmga1b        | 0.027902713  | 0.74962214  | 0.893182477 |
| ENSMUSG00000093548 | Gm6407        | 0.016766862  | 0.749582604 | 0.893182477 |
| ENSMUSG00000095672 | AC133103.5    | 0.027254482  | 0.748418541 | 0.893182477 |
| ENSMUSG00000113786 | Gm49384       | 0.028293853  | 0.749107322 | 0.893182477 |
| ENSMUSG00000053841 | Txlna         | -0.027423122 | 0.750663604 | 0.893188296 |
| ENSMUSG00000108518 | Gm5587        | 0.024168559  | 0.750848225 | 0.893322395 |
| ENSMUSG00000037270 | 4932438A13Rik | -0.021543861 | 0.751033013 | 0.893456667 |
| ENSMUSG00000042742 | Bmt2          | -0.027584202 | 0.751135167 | 0.893492617 |
| ENSMUSG00000022426 | Josd1         | -0.026478592 | 0.751272082 | 0.893569906 |
| ENSMUSG00000050891 | Tatdn1        | 0.026480829  | 0.751714033 | 0.894009959 |
| ENSMUSG00000027649 | Ctnnbl1       | 0.026759084  | 0.75190887  | 0.894070465 |
| ENSMUSG00000063694 | Cycs          | 0.028467159  | 0.751878021 | 0.894070465 |
| ENSMUSG00000001542 | Ell2          | -0.021499184 | 0.752231773 | 0.89435067  |
| ENSMUSG00000032086 | Bace1         | 0.024973355  | 0.752288527 | 0.89435067  |

|                    |               |              |             |             |
|--------------------|---------------|--------------|-------------|-------------|
| ENSMUSG00000021810 | Ecd           | 0.027260531  | 0.752703253 | 0.894758073 |
| ENSMUSG00000000532 | Acvr1b        | -0.018346586 | 0.753063293 | 0.895100398 |
| ENSMUSG00000020623 | Map2k6        | -0.027156475 | 0.753415001 | 0.895158038 |
| ENSMUSG00000024425 | Ndfip1        | -0.027073944 | 0.753544195 | 0.895158038 |
| ENSMUSG00000026107 | Nabp1         | -0.022927685 | 0.753448333 | 0.895158038 |
| ENSMUSG00000027079 | Clp1          | 0.027838605  | 0.75354244  | 0.895158038 |
| ENSMUSG00000031090 | Nadsyn1       | 0.025920749  | 0.753467537 | 0.895158038 |
| ENSMUSG00000116034 | CT009635.3    | -0.010664178 | 0.753404575 | 0.895158038 |
| ENSMUSG00000024588 | Fech          | -0.026638261 | 0.754064502 | 0.895579866 |
| ENSMUSG00000062822 | 4833420G17Rik | -0.027262724 | 0.754115596 | 0.895579866 |
| ENSMUSG00000099034 | 2810039B14Rik | -0.021237622 | 0.754103804 | 0.895579866 |
| ENSMUSG00000025809 | Itgb1         | 0.027589736  | 0.754462481 | 0.895867859 |
| ENSMUSG00000044701 | Il27          | 0.015593404  | 0.754502349 | 0.895867859 |
| ENSMUSG00000020785 | Camkk1        | -0.0188277   | 0.754725087 | 0.896046674 |
| ENSMUSG00000052997 | Uba2          | 0.027571932  | 0.754903343 | 0.896087005 |
| ENSMUSG00000113626 | Gm7240        | -0.024607164 | 0.754856835 | 0.896087005 |
| ENSMUSG00000078967 | Gm3272        | -0.00931789  | 0.755060301 | 0.896187673 |
| ENSMUSG00000017493 | Igfbp4        | 0.02784432   | 0.755191887 | 0.896231699 |
| ENSMUSG00000020325 | Fstl3         | 0.01918251   | 0.75530213  | 0.896231699 |
| ENSMUSG00000073421 | H2-Ab1        | 0.027637486  | 0.755313858 | 0.896231699 |
| ENSMUSG00000006299 | Aamp          | -0.02715578  | 0.755494021 | 0.896359846 |
| ENSMUSG00000024085 | Man2a1        | -0.026294665 | 0.755908183 | 0.896427611 |
| ENSMUSG00000034042 | Gppp1l1       | -0.024717353 | 0.75583577  | 0.896427611 |
| ENSMUSG00000035246 | Pcyt1b        | -0.007291309 | 0.755694809 | 0.896427611 |
| ENSMUSG00000052310 | Slc39a1       | 0.016056245  | 0.755911988 | 0.896427611 |
| ENSMUSG00000070643 | Sox13         | 0.021749184  | 0.75571996  | 0.896427611 |
| ENSMUSG00000024096 | Ralbp1        | 0.024269332  | 0.756217402 | 0.896447447 |
| ENSMUSG00000024319 | Vps52         | -0.025024381 | 0.756046215 | 0.896447447 |
| ENSMUSG00000028854 | Slc9a1        | 0.022423213  | 0.756196919 | 0.896447447 |
| ENSMUSG00000034259 | Exosc4        | 0.027162121  | 0.756079748 | 0.896447447 |
| ENSMUSG00000001089 | Luzp1         | 0.027303     | 0.756687501 | 0.896611067 |
| ENSMUSG00000014873 | Surf2         | -0.025832203 | 0.756716353 | 0.896611067 |
| ENSMUSG00000029174 | Tbc1d1        | -0.024312081 | 0.756537017 | 0.896611067 |
| ENSMUSG00000036103 | Colec12       | 0.011947405  | 0.756608779 | 0.896611067 |
| ENSMUSG00000043618 | Eif5a13-ps    | 0.018328572  | 0.756469903 | 0.896611067 |
| ENSMUSG00000024248 | Cox7a2l       | 0.027286168  | 0.757105107 | 0.896986124 |
| ENSMUSG00000023175 | Bsg           | 0.02606143   | 0.757658713 | 0.896986883 |
| ENSMUSG00000033863 | Klf9          | -0.026788032 | 0.757631479 | 0.896986883 |
| ENSMUSG00000062031 | Pgghg         | -0.019854367 | 0.757330902 | 0.896986883 |
| ENSMUSG00000063362 | Alg11         | -0.020359471 | 0.757360383 | 0.896986883 |
| ENSMUSG00000078870 | Gm14410       | 0.025267735  | 0.757517413 | 0.896986883 |
| ENSMUSG00000083084 | Gm14667       | -0.025257705 | 0.757473082 | 0.896986883 |
| ENSMUSG00000091604 | Gm17349       | 0.016521     | 0.757547919 | 0.896986883 |

|                    |               |              |             |             |
|--------------------|---------------|--------------|-------------|-------------|
| ENSMUSG00000109324 | Prmt1         | -0.023490622 | 0.75768347  | 0.896986883 |
| ENSMUSG00000019923 | Zwint         | 0.026042496  | 0.757990311 | 0.89722471  |
| ENSMUSG00000023911 | Flywch2       | 0.020220441  | 0.758028831 | 0.89722471  |
| ENSMUSG00000024792 | Zfpl1         | -0.02693304  | 0.758359063 | 0.89735798  |
| ENSMUSG00000042557 | Sin3a         | -0.023053924 | 0.758287433 | 0.89735798  |
| ENSMUSG00000091736 | Yy2           | 0.023305827  | 0.758430406 | 0.89735798  |
| ENSMUSG00000093384 | Gm20689       | 0.024173199  | 0.758420694 | 0.89735798  |
| ENSMUSG00000116679 | Gm49739       | -0.027481641 | 0.758511134 | 0.897368015 |
| ENSMUSG00000026639 | Lamb3         | 0.023022276  | 0.758702306 | 0.897508699 |
| ENSMUSG00000003546 | Klc4          | -0.026850539 | 0.758829755 | 0.897573982 |
| ENSMUSG00000044252 | Osbpl1a       | 0.027169806  | 0.758942412 | 0.897621758 |
| ENSMUSG00000025007 | Aldh18a1      | 0.027072219  | 0.759290582 | 0.897862559 |
| ENSMUSG00000026649 | Cfap126       | 0.017370339  | 0.759245471 | 0.897862559 |
| ENSMUSG00000004393 | Ddx56         | 0.025621742  | 0.759500963 | 0.898025841 |
| ENSMUSG00000003345 | Csnk1g2       | -0.025048261 | 0.760306647 | 0.898807353 |
| ENSMUSG00000052560 | Cpne8         | 0.018216734  | 0.76023787  | 0.898807353 |
| ENSMUSG00000037890 | Wdr19         | -0.014873156 | 0.760490646 | 0.898939314 |
| ENSMUSG00000028795 | Ccdc28b       | -0.025828335 | 0.760566728 | 0.898943698 |
| ENSMUSG00000015341 | Golga7        | -0.024999155 | 0.760912781 | 0.899267141 |
| ENSMUSG00000030811 | Fbxl19        | -0.011391921 | 0.761084667 | 0.899384707 |
| ENSMUSG00000116864 | Gm3320        | 0.026825021  | 0.761215557 | 0.899453809 |
| ENSMUSG00000028433 | Ubap2         | -0.025606261 | 0.761345645 | 0.89952195  |
| ENSMUSG00000096727 | Psmb9         | 0.022375458  | 0.761423718 | 0.899528629 |
| ENSMUSG00000000791 | Ii12rb1       | -0.014076677 | 0.761671799 | 0.89973613  |
| ENSMUSG00000033227 | Wnt6          | 0.012330269  | 0.761812989 | 0.899803804 |
| ENSMUSG00000038025 | Phf2          | -0.025188292 | 0.761873972 | 0.899803804 |
| ENSMUSG00000104103 | Gm9517        | -0.012383456 | 0.762053764 | 0.899930577 |
| ENSMUSG00000031400 | G6pdx         | -0.026383555 | 0.762257386 | 0.899999904 |
| ENSMUSG00000037846 | Rtkn2         | -0.026283167 | 0.76223776  | 0.899999904 |
| ENSMUSG00000050270 | Tmem220       | 0.015848486  | 0.76249686  | 0.900197082 |
| ENSMUSG00000022507 | 1810013L24Rik | 0.026836641  | 0.762861977 | 0.9003714   |
| ENSMUSG00000029028 | Lrrc47        | -0.026274889 | 0.762827227 | 0.9003714   |
| ENSMUSG00000037286 | Stag1         | -0.025960027 | 0.76279046  | 0.9003714   |
| ENSMUSG00000024151 | Msh2          | 0.026395988  | 0.763222704 | 0.90054044  |
| ENSMUSG00000028419 | Chmp5         | 0.025630204  | 0.763161851 | 0.90054044  |
| ENSMUSG00000090486 | BC035947      | -0.01541007  | 0.763184814 | 0.90054044  |
| ENSMUSG00000017830 | Dhx58         | -0.024572947 | 0.763363279 | 0.900540797 |
| ENSMUSG00000058126 | Tpm3-rs7      | 0.026215238  | 0.76336801  | 0.900540797 |
| ENSMUSG00000031533 | Mrps31        | 0.025612902  | 0.763476813 | 0.900583618 |
| ENSMUSG00000008822 | Acyp1         | 0.024041358  | 0.763624774 | 0.900587099 |
| ENSMUSG00000032437 | Stt3b         | 0.026536026  | 0.763585951 | 0.900587099 |
| ENSMUSG00000026280 | Atg4b         | 0.024402618  | 0.763815763 | 0.900710881 |
| ENSMUSG00000081254 | Gm12112       | -0.026139107 | 0.763947278 | 0.900710881 |

|                    |               |              |             |             |
|--------------------|---------------|--------------|-------------|-------------|
| ENSMUSG00000101111 | Gm28437       | 0.014996936  | 0.763884268 | 0.900710881 |
| ENSMUSG00000090173 | Fbxw10        | -0.013185039 | 0.764118459 | 0.9008272   |
| ENSMUSG00000029036 | Atad3a        | -0.025362346 | 0.764206608 | 0.900845618 |
| ENSMUSG00000022052 | Ppp2r2a       | -0.024469661 | 0.764357188 | 0.90093762  |
| ENSMUSG00000045752 | Tssc4         | -0.02563472  | 0.764549634 | 0.901078945 |
| ENSMUSG00000024273 | 2700062C07Rik | 0.026202183  | 0.765055324 | 0.901114857 |
| ENSMUSG00000030588 | Yif1b         | 0.023245532  | 0.765096681 | 0.901114857 |
| ENSMUSG00000034509 | Mad2l1bp      | -0.025507818 | 0.76485203  | 0.901114857 |
| ENSMUSG00000035545 | Leng8         | 0.020617101  | 0.764954451 | 0.901114857 |
| ENSMUSG00000040028 | Elavl1        | 0.023998375  | 0.76486583  | 0.901114857 |
| ENSMUSG00000043067 | Dpy19l1       | 0.025995729  | 0.764734221 | 0.901114857 |
| ENSMUSG00000064141 | Zfp69         | 0.02348749   | 0.765160486 | 0.901114857 |
| ENSMUSG00000083899 | Gm12346       | -0.01774257  | 0.765015017 | 0.901114857 |
| ENSMUSG00000069678 | Pcgf1         | -0.025590969 | 0.765430483 | 0.901347367 |
| ENSMUSG00000028412 | Slc44a1       | 0.012585687  | 0.765601235 | 0.901462977 |
| ENSMUSG00000040537 | Adam22        | -0.016047412 | 0.765800049 | 0.901589843 |
| ENSMUSG00000044968 | Napepld       | 0.021087565  | 0.765854685 | 0.901589843 |
| ENSMUSG00000052917 | Senp7         | -0.024122779 | 0.765926739 | 0.901589843 |
| ENSMUSG00000052395 | Rft1          | -0.02606933  | 0.766043311 | 0.901641615 |
| ENSMUSG00000038836 | Agbl3         | 0.020661894  | 0.766265334 | 0.901817483 |
| ENSMUSG00000033960 | Jcad          | -0.02173167  | 0.766414127 | 0.901907141 |
| ENSMUSG00000003437 | Paf1          | -0.024468521 | 0.766766207 | 0.902150521 |
| ENSMUSG00000036769 | Wdr44         | -0.024144692 | 0.766734743 | 0.902150521 |
| ENSMUSG00000026683 | Nuf2          | 0.025030653  | 0.766861528 | 0.902177215 |
| ENSMUSG00000004934 | Pias4         | 0.023685904  | 0.768657358 | 0.902580171 |
| ENSMUSG00000006191 | Cdkal1        | -0.025784909 | 0.76738894  | 0.902580171 |
| ENSMUSG00000010290 | Al597479      | 0.025855202  | 0.767507282 | 0.902580171 |
| ENSMUSG00000020798 | Spns3         | -0.025265087 | 0.768642703 | 0.902580171 |
| ENSMUSG00000027854 | Sike1         | -0.024845619 | 0.76818621  | 0.902580171 |
| ENSMUSG00000029082 | Bst1          | 0.011575364  | 0.76734732  | 0.902580171 |
| ENSMUSG00000029569 | Tmem168       | -0.023451671 | 0.768015522 | 0.902580171 |
| ENSMUSG00000029781 | Fkbp9         | 0.026351411  | 0.768644876 | 0.902580171 |
| ENSMUSG00000031357 | Syap1         | 0.025965911  | 0.768314549 | 0.902580171 |
| ENSMUSG00000031960 | Aars          | 0.0263784    | 0.768286257 | 0.902580171 |
| ENSMUSG00000037235 | Mxd4          | -0.02577293  | 0.76762051  | 0.902580171 |
| ENSMUSG00000037935 | Smarce1       | 0.024101082  | 0.768223026 | 0.902580171 |
| ENSMUSG00000043017 | Ptgir         | 0.024887726  | 0.768555461 | 0.902580171 |
| ENSMUSG00000050213 | Snip1         | -0.025750437 | 0.768419899 | 0.902580171 |
| ENSMUSG00000051118 | Olfr77        | 0.025485806  | 0.768138479 | 0.902580171 |
| ENSMUSG00000053877 | Srcap         | 0.024647089  | 0.768478626 | 0.902580171 |
| ENSMUSG00000059669 | Taf1b         | 0.025764818  | 0.768297158 | 0.902580171 |
| ENSMUSG00000069631 | Strada        | 0.024887154  | 0.767523326 | 0.902580171 |
| ENSMUSG00000079144 | A130010J15Rik | -0.025661917 | 0.767984247 | 0.902580171 |

|                    |               |              |             |             |
|--------------------|---------------|--------------|-------------|-------------|
| ENSMUSG00000094649 | Gm7102        | -0.015036133 | 0.767954187 | 0.902580171 |
| ENSMUSG00000034518 | Hmgxb4        | 0.022999819  | 0.768788993 | 0.902649408 |
| ENSMUSG00000022070 | Bora          | -0.025487129 | 0.76908143  | 0.90274387  |
| ENSMUSG00000027326 | Kn1           | -0.025465003 | 0.768943212 | 0.90274387  |
| ENSMUSG00000069255 | Dusp22        | 0.019702188  | 0.769087484 | 0.90274387  |
| ENSMUSG00000024776 | Stambpl1      | 0.025677803  | 0.769530081 | 0.90276223  |
| ENSMUSG00000036873 | 2410004B18Rik | 0.024504988  | 0.769611887 | 0.90276223  |
| ENSMUSG00000046150 | Olfr918       | -0.015881469 | 0.769484623 | 0.90276223  |
| ENSMUSG00000049971 | Glt1d1        | 0.021386855  | 0.769593326 | 0.90276223  |
| ENSMUSG00000060600 | Eno3          | -0.024619056 | 0.769447896 | 0.90276223  |
| ENSMUSG00000062646 | Ganc          | 0.025048487  | 0.769611188 | 0.90276223  |
| ENSMUSG00000112640 | Gm32687       | -0.022255646 | 0.76948828  | 0.90276223  |
| ENSMUSG00000031812 | Map1lc3b      | 0.025102646  | 0.769805625 | 0.902904218 |
| ENSMUSG00000028494 | Plin2         | -0.023003604 | 0.770004658 | 0.903052389 |
| ENSMUSG00000027900 | Dram2         | -0.023744312 | 0.770195935 | 0.903106276 |
| ENSMUSG00000031585 | Gtf2e2        | 0.026648215  | 0.770196022 | 0.903106276 |
| ENSMUSG00000030946 | Lhpp          | 0.025335942  | 0.770321734 | 0.903168422 |
| ENSMUSG00000037315 | Jade3         | 0.019869861  | 0.770435929 | 0.903217052 |
| ENSMUSG00000041671 | Pyroxd1       | 0.025352553  | 0.77054255  | 0.903256797 |
| ENSMUSG00000012483 | Rpa3          | 0.027911062  | 0.770694642 | 0.903341264 |
| ENSMUSG00000030263 | Lrmp          | 0.02393361   | 0.770832788 | 0.903341264 |
| ENSMUSG00000036109 | Mbnl3         | -0.025323953 | 0.770774246 | 0.903341264 |
| ENSMUSG00000021420 | Fars2         | 0.025142169  | 0.771216025 | 0.903619871 |
| ENSMUSG00000064090 | Vrk2          | 0.02327945   | 0.77118977  | 0.903619871 |
| ENSMUSG00000027243 | Harbi1        | -0.024967331 | 0.771381789 | 0.903728844 |
| ENSMUSG00000018846 | Pank3         | 0.024527467  | 0.771458364 | 0.903733315 |
| ENSMUSG00000026616 | Cr2           | 0.023616351  | 0.771720733 | 0.903955415 |
| ENSMUSG00000030347 | D6Wsu163e     | 0.022323117  | 0.772602656 | 0.90490312  |
| ENSMUSG00000039963 | Ccdc40        | 0.022047957  | 0.77275856  | 0.905000385 |
| ENSMUSG00000044847 | Lsm11         | 0.025181299  | 0.772909847 | 0.905092223 |
| ENSMUSG00000021133 | Susd6         | 0.021088658  | 0.773137675 | 0.905273667 |
| ENSMUSG00000037499 | Nenf          | -0.025170394 | 0.77349279  | 0.905604105 |
| ENSMUSG00000055371 | Stam2         | -0.024686478 | 0.773593397 | 0.90563653  |
| ENSMUSG00000052151 | Plpp2         | 0.024531486  | 0.773740878 | 0.905672872 |
| ENSMUSG00000056820 | Tsnax         | -0.020708406 | 0.773770269 | 0.905672872 |
| ENSMUSG00000022003 | Slc25a30      | 0.015358776  | 0.774071096 | 0.905939611 |
| ENSMUSG00000027087 | Itgav         | 0.018222395  | 0.774148653 | 0.905945018 |
| ENSMUSG00000021112 | Mpp5          | -0.025224359 | 0.77423988  | 0.90596642  |
| ENSMUSG00000032231 | Anxa2         | -0.020110835 | 0.774414561 | 0.906000119 |
| ENSMUSG00000039873 | Neur12        | -0.022255795 | 0.774413244 | 0.906000119 |
| ENSMUSG00000055660 | Mettl4        | -0.02483951  | 0.774499756 | 0.906014454 |
| ENSMUSG00000034563 | Ccpg1         | -0.025132032 | 0.774743242 | 0.906140771 |
| ENSMUSG00000049792 | Bag5          | -0.025757836 | 0.774753642 | 0.906140771 |

|                    |            |              |             |             |
|--------------------|------------|--------------|-------------|-------------|
| ENSMUSG0000006850  | Tmco6      | -0.024722842 | 0.775437908 | 0.906220676 |
| ENSMUSG00000015575 | Atp6v0e    | 0.023868333  | 0.77516417  | 0.906220676 |
| ENSMUSG00000026094 | Stk17b     | -0.024564355 | 0.775187687 | 0.906220676 |
| ENSMUSG00000030101 | Sumf1      | 0.025851224  | 0.775465062 | 0.906220676 |
| ENSMUSG00000030795 | Fus        | -0.024757528 | 0.775202185 | 0.906220676 |
| ENSMUSG00000036825 | Ssx2ip     | 0.024364189  | 0.775263808 | 0.906220676 |
| ENSMUSG00000047810 | Ccdc88b    | 0.023137491  | 0.775084212 | 0.906220676 |
| ENSMUSG00000067929 | Gm10226    | -0.015441512 | 0.775212889 | 0.906220676 |
| ENSMUSG00000093798 | Gm8355     | 0.018670128  | 0.77547859  | 0.906220676 |
| ENSMUSG00000049800 | Sertad2    | -0.023595113 | 0.775730993 | 0.906430354 |
| ENSMUSG00000038429 | Usp5       | -0.024962358 | 0.775857129 | 0.906483125 |
| ENSMUSG00000112693 | Gm5512     | -0.024186189 | 0.775922114 | 0.906483125 |
| ENSMUSG00000021413 | Prpf4b     | -0.024905827 | 0.776093283 | 0.906597824 |
| ENSMUSG00000024401 | Tnf        | 0.018421853  | 0.776379217 | 0.906846554 |
| ENSMUSG00000043535 | Setx       | 0.024967946  | 0.776619405 | 0.906956528 |
| ENSMUSG00000074500 | Zfp558     | -0.012325804 | 0.77659343  | 0.906956528 |
| ENSMUSG00000027479 | Mapre1     | 0.032373203  | 0.776801831 | 0.906988512 |
| ENSMUSG00000042487 | Leo1       | 0.024865984  | 0.776905333 | 0.906988512 |
| ENSMUSG00000042709 | Atpaf2     | -0.02488087  | 0.776938875 | 0.906988512 |
| ENSMUSG00000060862 | Zbtb40     | -0.019296095 | 0.776752159 | 0.906988512 |
| ENSMUSG00000051469 | Zfp24      | -0.024235342 | 0.777160537 | 0.907162018 |
| ENSMUSG00000020758 | Itgb4      | -0.013321115 | 0.777464613 | 0.907346421 |
| ENSMUSG00000025648 | Pfkfb4     | -0.023008629 | 0.777423881 | 0.907346421 |
| ENSMUSG00000073664 | Nbeal1     | 0.019052471  | 0.777617555 | 0.907436618 |
| ENSMUSG00000078923 | Ube2v1     | -0.024828342 | 0.777688012 | 0.907436618 |
| ENSMUSG00000069662 | Marcks     | 0.023790275  | 0.777863031 | 0.90755558  |
| ENSMUSG00000026851 | BC005624   | -0.020783288 | 0.777961039 | 0.907583725 |
| ENSMUSG00000031143 | Ccdc22     | -0.023395106 | 0.778033291 | 0.907583725 |
| ENSMUSG00000019659 | Ccdc12     | 0.022971766  | 0.778206833 | 0.907700918 |
| ENSMUSG00000026999 | Nup35      | 0.024676126  | 0.778537008 | 0.908000768 |
| ENSMUSG00000002396 | Ocel1      | -0.023966116 | 0.778897064 | 0.908008905 |
| ENSMUSG00000027848 | Olfml3     | 0.014585822  | 0.778861929 | 0.908008905 |
| ENSMUSG00000031508 | Ankrd10    | -0.024882564 | 0.778903563 | 0.908008905 |
| ENSMUSG00000032567 | Aste1      | 0.024338017  | 0.778982602 | 0.908008905 |
| ENSMUSG00000040606 | Kazn       | -0.010562509 | 0.778963239 | 0.908008905 |
| ENSMUSG00000095042 | Gm12537    | 0.007038475  | 0.778622933 | 0.908008905 |
| ENSMUSG00000026377 | Nifk       | 0.022688091  | 0.77912681  | 0.90809178  |
| ENSMUSG00000034158 | Lrrc58     | -0.024058348 | 0.779285825 | 0.908191896 |
| ENSMUSG00000028677 | Rnf220     | -0.023080122 | 0.779400712 | 0.908240571 |
| ENSMUSG00000021952 | Xpo4       | -0.023822493 | 0.780163926 | 0.908461639 |
| ENSMUSG00000023805 | Synj2      | 0.021199839  | 0.780460276 | 0.908461639 |
| ENSMUSG00000024188 | Luc7l      | 0.026539024  | 0.780284747 | 0.908461639 |
| ENSMUSG00000024295 | Cyp4f41-ps | -0.011238296 | 0.780048165 | 0.908461639 |

|                    |               |              |             |             |
|--------------------|---------------|--------------|-------------|-------------|
| ENSMUSG00000026880 | Stom          | 0.023651054  | 0.780541229 | 0.908461639 |
| ENSMUSG00000031232 | Magt1         | 0.024266032  | 0.780100748 | 0.908461639 |
| ENSMUSG00000032122 | Slc37a2       | 0.015961628  | 0.780512    | 0.908461639 |
| ENSMUSG00000034959 | Rubcnl        | 0.021596303  | 0.779986803 | 0.908461639 |
| ENSMUSG00000046179 | E2f8          | -0.021657843 | 0.780530209 | 0.908461639 |
| ENSMUSG00000048911 | Rnf24         | -0.012518071 | 0.77972088  | 0.908461639 |
| ENSMUSG00000072969 | Armcx5        | 0.022918527  | 0.780458489 | 0.908461639 |
| ENSMUSG00000073616 | Cops9         | 0.021410556  | 0.779926505 | 0.908461639 |
| ENSMUSG00000083551 | Gm14516       | 0.01361579   | 0.780025784 | 0.908461639 |
| ENSMUSG00000020572 | Nampt         | -0.02348846  | 0.78138803  | 0.908648398 |
| ENSMUSG00000026201 | Stk16         | -0.032898457 | 0.781151251 | 0.908648398 |
| ENSMUSG00000028312 | Smc2          | 0.022692937  | 0.781243967 | 0.908648398 |
| ENSMUSG00000028945 | Rheb          | -0.024260645 | 0.78119031  | 0.908648398 |
| ENSMUSG00000032068 | Plet1         | 0.012460237  | 0.781229869 | 0.908648398 |
| ENSMUSG00000035877 | Zhx3          | -0.019161839 | 0.781357315 | 0.908648398 |
| ENSMUSG00000038023 | Atp6v0a2      | -0.021172077 | 0.781607933 | 0.908648398 |
| ENSMUSG00000039156 | Stim2         | 0.024629775  | 0.780856295 | 0.908648398 |
| ENSMUSG00000044763 | Trmt10c       | 0.022149093  | 0.7811951   | 0.908648398 |
| ENSMUSG00000049285 | Mblac1        | 0.024043737  | 0.780958803 | 0.908648398 |
| ENSMUSG00000054874 | Pcnx3         | -0.01867413  | 0.78156014  | 0.908648398 |
| ENSMUSG00000056155 | Nanos3        | -0.013274235 | 0.781652695 | 0.908648398 |
| ENSMUSG00000059995 | Atxn7l3       | -0.023647973 | 0.781514334 | 0.908648398 |
| ENSMUSG00000019977 | Hbs1l         | -0.023327376 | 0.782119024 | 0.908682176 |
| ENSMUSG00000039585 | Myo9a         | -0.020753674 | 0.781843643 | 0.908682176 |
| ENSMUSG00000041431 | Ccnb1         | 0.023019404  | 0.781840774 | 0.908682176 |
| ENSMUSG00000053414 | Hunk          | -0.01369862  | 0.782088673 | 0.908682176 |
| ENSMUSG00000061062 | Gm10093       | 0.016823232  | 0.781917834 | 0.908682176 |
| ENSMUSG00000072568 | Fam84b        | -0.021963704 | 0.782120694 | 0.908682176 |
| ENSMUSG00000021248 | Tmed10        | 0.019693238  | 0.782360055 | 0.908759063 |
| ENSMUSG00000023018 | Smarcd1       | -0.021723443 | 0.782391201 | 0.908759063 |
| ENSMUSG00000050708 | Ftl1          | -0.023011914 | 0.782406362 | 0.908759063 |
| ENSMUSG00000015542 | Nat9          | -0.024069502 | 0.782739445 | 0.908806006 |
| ENSMUSG00000021027 | Ralgapa1      | -0.024022491 | 0.782691195 | 0.908806006 |
| ENSMUSG00000025647 | Shisa5        | -0.0239495   | 0.782551858 | 0.908806006 |
| ENSMUSG00000042500 | Ago4          | -0.012772926 | 0.782703185 | 0.908806006 |
| ENSMUSG00000048001 | Hes5          | 0.013145487  | 0.782825569 | 0.908821048 |
| ENSMUSG00000082070 | Gm1866        | -0.02410027  | 0.78297207  | 0.908906176 |
| ENSMUSG00000033111 | 3830406C13Rik | 0.023752839  | 0.783295801 | 0.909197004 |
| ENSMUSG00000035798 | Zdhhc17       | -0.018699605 | 0.783413226 | 0.909248334 |
| ENSMUSG00000021264 | Yy1           | 0.024253222  | 0.783786313 | 0.909284916 |
| ENSMUSG00000029179 | Zcchc4        | -0.023908783 | 0.783790164 | 0.909284916 |
| ENSMUSG00000040681 | Hmgn1         | -0.021029918 | 0.783720106 | 0.909284916 |
| ENSMUSG00000053799 | Exoc6         | 0.023441991  | 0.783590756 | 0.909284916 |

|                    |               |              |             |             |
|--------------------|---------------|--------------|-------------|-------------|
| ENSMUSG00000058492 | Scp2-ps2      | 0.023314228  | 0.783810772 | 0.909284916 |
| ENSMUSG00000020948 | Klhl28        | 0.022857535  | 0.784290211 | 0.909586248 |
| ENSMUSG00000039217 | Il18          | -0.014556206 | 0.78423954  | 0.909586248 |
| ENSMUSG00000089967 | Gm16550       | -0.023738349 | 0.784253631 | 0.909586248 |
| ENSMUSG00000006678 | Pola1         | -0.015605405 | 0.784775556 | 0.909950631 |
| ENSMUSG00000020660 | Pomc          | 0.016284179  | 0.785463346 | 0.909950631 |
| ENSMUSG00000021549 | Rasa1         | 0.023988418  | 0.78527451  | 0.909950631 |
| ENSMUSG00000021918 | Nek4          | 0.023727036  | 0.785292842 | 0.909950631 |
| ENSMUSG00000024498 | Tcerg1        | 0.023508169  | 0.785344584 | 0.909950631 |
| ENSMUSG00000028062 | Lamtor2       | 0.024123283  | 0.784812437 | 0.909950631 |
| ENSMUSG00000028639 | Ybx1          | -0.029032865 | 0.785483509 | 0.909950631 |
| ENSMUSG00000029263 | Pigg          | -0.023588194 | 0.785166917 | 0.909950631 |
| ENSMUSG00000034673 | Pbx2          | -0.02136852  | 0.785366999 | 0.909950631 |
| ENSMUSG00000037369 | Kdm6a         | -0.018804296 | 0.784995033 | 0.909950631 |
| ENSMUSG00000082855 | Gm14537       | -0.014633937 | 0.785070845 | 0.909950631 |
| ENSMUSG00000117148 | Vmn1r229      | -0.014010502 | 0.785406619 | 0.909950631 |
| ENSMUSG00000017405 | Nek8          | -0.02124417  | 0.785912185 | 0.910362328 |
| ENSMUSG00000024238 | Zeb1          | -0.022391926 | 0.786034475 | 0.91041908  |
| ENSMUSG00000027227 | Sord          | 0.022430525  | 0.786235944 | 0.910482628 |
| ENSMUSG00000031948 | Kars          | 0.023861224  | 0.786207834 | 0.910482628 |
| ENSMUSG00000056268 | Dennd1b       | -0.019789653 | 0.786544327 | 0.910669938 |
| ENSMUSG00000060227 | Casc4         | -0.01969238  | 0.786499273 | 0.910669938 |
| ENSMUSG00000018599 | Mief2         | 0.018607186  | 0.786871168 | 0.91081729  |
| ENSMUSG00000021250 | Fos           | 0.02383024   | 0.786815048 | 0.91081729  |
| ENSMUSG00000045767 | B230219D22Rik | -0.023618786 | 0.786964911 | 0.91081729  |
| ENSMUSG00000098132 | Rassf10       | 0.013578589  | 0.786944009 | 0.91081729  |
| ENSMUSG00000045667 | Smtnl2        | 0.014774077  | 0.787160274 | 0.910955458 |
| ENSMUSG00000083505 | Gm7541        | 0.015610004  | 0.787230971 | 0.910955458 |
| ENSMUSG00000041415 | Dicer1        | 0.023798662  | 0.787361492 | 0.91102162  |
| ENSMUSG00000024712 | Rfk           | 0.02089689   | 0.787524433 | 0.911040419 |
| ENSMUSG00000045237 | 1110012L19Rik | -0.022660845 | 0.787504344 | 0.911040419 |
| ENSMUSG00000033355 | Rtp4          | 0.011388297  | 0.787637762 | 0.911086668 |
| ENSMUSG00000031360 | Ctps2         | -0.022333054 | 0.787805357 | 0.911192111 |
| ENSMUSG00000033065 | Pfkm          | -0.016239719 | 0.787875635 | 0.911192111 |
| ENSMUSG00000019080 | Mfsd3         | 0.023541008  | 0.78797327  | 0.911220183 |
| ENSMUSG00000039262 | Prrc2b        | -0.022409285 | 0.788115265 | 0.911299545 |
| ENSMUSG00000018160 | Med1          | -0.023600928 | 0.788358198 | 0.911495594 |
| ENSMUSG00000003848 | Nob1          | 0.023362556  | 0.788437913 | 0.911502915 |
| ENSMUSG00000008028 | 1700008O03Rik | 0.0171767    | 0.788806519 | 0.911797265 |
| ENSMUSG00000041028 | Ghitm         | -0.02171338  | 0.788912745 | 0.911797265 |
| ENSMUSG00000053801 | Grwd1         | 0.024007849  | 0.788855066 | 0.911797265 |
| ENSMUSG00000029416 | Slc15a4       | -0.021802643 | 0.788997902 | 0.911810843 |
| ENSMUSG00000032540 | Abhd5         | 0.022927296  | 0.78912505  | 0.911872942 |

|                    |          |              |             |             |
|--------------------|----------|--------------|-------------|-------------|
| ENSMUSG0000000876  | Pxmp4    | -0.021503192 | 0.789508122 | 0.911895614 |
| ENSMUSG00000010307 | Tmem86a  | -0.022211058 | 0.789397055 | 0.911895614 |
| ENSMUSG00000041961 | Znrf3    | 0.012915946  | 0.78948277  | 0.911895614 |
| ENSMUSG00000047141 | Zfp654   | 0.023294633  | 0.789258255 | 0.911895614 |
| ENSMUSG00000047821 | Trim16   | -0.022946257 | 0.789511749 | 0.911895614 |
| ENSMUSG00000029726 | Mepce    | -0.022953869 | 0.790074342 | 0.912460567 |
| ENSMUSG00000079580 | Tmem217  | -0.013486181 | 0.790260524 | 0.912590737 |
| ENSMUSG00000110649 | Gm40466  | -0.01486607  | 0.790633869 | 0.912936998 |
| ENSMUSG00000043702 | Pde12    | -0.02305141  | 0.790886695 | 0.913144045 |
| ENSMUSG00000028382 | Ptbp3    | 0.021424777  | 0.791329169 | 0.913569997 |
| ENSMUSG00000044147 | Arf6     | -0.022382448 | 0.791495599 | 0.913677215 |
| ENSMUSG00000032182 | Yipf2    | 0.023131597  | 0.791654489 | 0.913775709 |
| ENSMUSG00000018848 | Rars     | 0.022492622  | 0.791910483 | 0.913816654 |
| ENSMUSG00000048424 | Ranbp3l  | -0.014063133 | 0.791779    | 0.913816654 |
| ENSMUSG00000054693 | Adam10   | 0.023049134  | 0.791910673 | 0.913816654 |
| ENSMUSG00000038126 | Mphosph9 | -0.018361315 | 0.792181298 | 0.913935539 |
| ENSMUSG00000039193 | Nlrc4    | 0.017807613  | 0.792199059 | 0.913935539 |
| ENSMUSG00000050332 | Amer1    | -0.023015181 | 0.792234438 | 0.913935539 |
| ENSMUSG00000001891 | Ugp2     | -0.021830748 | 0.792615782 | 0.914205648 |
| ENSMUSG00000041488 | Stx3     | -0.021665426 | 0.792595086 | 0.914205648 |
| ENSMUSG00000032324 | Tspan3   | -0.023299014 | 0.792834014 | 0.914372451 |
| ENSMUSG00000025086 | Trub1    | -0.022454792 | 0.793245239 | 0.914422192 |
| ENSMUSG00000027808 | Serp1    | 0.014571628  | 0.793027444 | 0.914422192 |
| ENSMUSG00000037922 | Bank1    | -0.014391914 | 0.79306984  | 0.914422192 |
| ENSMUSG00000039197 | Adk      | -0.023004384 | 0.793201627 | 0.914422192 |
| ENSMUSG00000101236 | Gm6750   | 0.017582691  | 0.793186962 | 0.914422192 |
| ENSMUSG00000027890 | Gstm4    | 0.023202182  | 0.793376353 | 0.914488463 |
| ENSMUSG00000014606 | Slc25a11 | 0.021569412  | 0.793528957 | 0.914579491 |
| ENSMUSG00000019877 | Serinc1  | -0.022638703 | 0.793769525 | 0.914771875 |
| ENSMUSG00000042506 | Usp22    | 0.020694055  | 0.793956856 | 0.914902877 |
| ENSMUSG00000059897 | Zfp930   | -0.022678403 | 0.794207078 | 0.915055567 |
| ENSMUSG00000079418 | Atg4a    | -0.022371923 | 0.794236701 | 0.915055567 |
| ENSMUSG00000019852 | Arfgef3  | -0.011593765 | 0.79438477  | 0.915056407 |
| ENSMUSG00000022204 | Ngdn     | 0.023136402  | 0.794331545 | 0.915056407 |
| ENSMUSG00000107705 | Gm45062  | 0.002282125  | 0.79470136  | 0.915336201 |
| ENSMUSG00000022983 | Scaf4    | -0.023427683 | 0.794924424 | 0.915508231 |
| ENSMUSG00000028879 | Stx12    | -0.02194008  | 0.795205626 | 0.91574718  |
| ENSMUSG00000104434 | Gm37421  | -0.021843104 | 0.795294992 | 0.91576519  |
| ENSMUSG00000024241 | Sos1     | 0.019640216  | 0.795464654 | 0.915875646 |
| ENSMUSG00000014601 | Strip1   | -0.022595939 | 0.795818077 | 0.91588709  |
| ENSMUSG00000034243 | Golgb1   | -0.021063693 | 0.795813005 | 0.91588709  |
| ENSMUSG00000035765 | Dym      | 0.021723953  | 0.795990752 | 0.91588709  |
| ENSMUSG00000042694 | Stn1     | -0.007643856 | 0.795933744 | 0.91588709  |

|                    |               |              |             |             |
|--------------------|---------------|--------------|-------------|-------------|
| ENSMUSG00000056529 | Ptafr         | -0.016802844 | 0.795856756 | 0.91588709  |
| ENSMUSG00000075000 | Nrbf2         | 0.019550471  | 0.795972032 | 0.91588709  |
| ENSMUSG00000106948 | Gm42785       | 0.015672227  | 0.795767606 | 0.91588709  |
| ENSMUSG00000021720 | Rnf180        | 0.012201033  | 0.79621465  | 0.915962296 |
| ENSMUSG00000034449 | Dhrs11        | -0.021726622 | 0.796277343 | 0.915962296 |
| ENSMUSG00000071454 | Dtnb          | -0.020755369 | 0.796163557 | 0.915962296 |
| ENSMUSG00000023074 | Mospd1        | 0.022697541  | 0.79663554  | 0.915993045 |
| ENSMUSG00000032641 | Gpr19         | 0.01995136   | 0.796498252 | 0.915993045 |
| ENSMUSG00000036356 | Csgalnact1    | -0.008043681 | 0.796631858 | 0.915993045 |
| ENSMUSG00000036594 | H2-Aa         | -0.012559047 | 0.796565287 | 0.915993045 |
| ENSMUSG00000092074 | Dynlt1a       | -0.021876631 | 0.796672801 | 0.915993045 |
| ENSMUSG00000020812 | 1810032O08Rik | -0.021257177 | 0.79727999  | 0.916296461 |
| ENSMUSG00000027737 | Slc7a11       | -0.014199069 | 0.797091144 | 0.916296461 |
| ENSMUSG00000028041 | Adam15        | -0.01541377  | 0.797379313 | 0.916296461 |
| ENSMUSG00000047658 | Gal3st3       | 0.011125481  | 0.797316459 | 0.916296461 |
| ENSMUSG00000060510 | Zfp266        | -0.021888313 | 0.797341182 | 0.916296461 |
| ENSMUSG00000089728 | Clec2f        | 0.013991812  | 0.797347619 | 0.916296461 |
| ENSMUSG00000053838 | Nudcd3        | -0.021927489 | 0.797654509 | 0.916527906 |
| ENSMUSG00000049327 | Kmt5a         | -0.020223847 | 0.79772947  | 0.916529252 |
| ENSMUSG00000042328 | Hps4          | -0.021287539 | 0.797856798 | 0.91659076  |
| ENSMUSG00000056941 | Commd7        | 0.022394269  | 0.798176135 | 0.916872817 |
| ENSMUSG00000027634 | Ndr3          | -0.020634433 | 0.798269256 | 0.916894991 |
| ENSMUSG00000074210 | E130208F15Rik | 0.010725759  | 0.798946238 | 0.917582165 |
| ENSMUSG00000105706 | Gm42855       | 0.016433593  | 0.799015272 | 0.917582165 |
| ENSMUSG00000031521 | Aga           | 0.02115674   | 0.799318369 | 0.917675706 |
| ENSMUSG00000040594 | Ranbp17       | -0.011673054 | 0.799239457 | 0.917675706 |
| ENSMUSG00000055067 | Smyd3         | 0.021649033  | 0.799249089 | 0.917675706 |
| ENSMUSG00000025584 | Pde8a         | 0.018188054  | 0.800039155 | 0.918185803 |
| ENSMUSG00000030549 | Rhcg          | 0.012117376  | 0.799977025 | 0.918185803 |
| ENSMUSG00000037572 | Wdhd1         | -0.019063523 | 0.799981264 | 0.918185803 |
| ENSMUSG00000053329 | D10Jhu81e     | -0.021294714 | 0.800058365 | 0.918185803 |
| ENSMUSG00000022335 | Zfat          | -0.013270475 | 0.80014919  | 0.9182052   |
| ENSMUSG00000039616 | Mocos         | 0.02062519   | 0.800392159 | 0.918399169 |
| ENSMUSG00000032309 | Fbxo22        | -0.021819941 | 0.800802342 | 0.918615247 |
| ENSMUSG00000059237 | Ppp1r2-ps4    | 0.016316178  | 0.800752659 | 0.918615247 |
| ENSMUSG00000114133 | Gm20075       | 0.020916106  | 0.800691256 | 0.918615247 |
| ENSMUSG00000028483 | Snpc3         | 0.022313279  | 0.800951538 | 0.918665455 |
| ENSMUSG00000030619 | Eed           | 0.022040346  | 0.800994033 | 0.918665455 |
| ENSMUSG00000032114 | Slc37a4       | -0.021740938 | 0.80125814  | 0.918883516 |
| ENSMUSG00000113949 | Scamp4        | -0.021116197 | 0.801787101 | 0.919405242 |
| ENSMUSG00000021252 | Erg28         | 0.017800921  | 0.802184655 | 0.919653992 |
| ENSMUSG00000029007 | Agtrap        | 0.02027095   | 0.802371307 | 0.919653992 |
| ENSMUSG00000054036 | Olfir279      | -0.012802505 | 0.802345193 | 0.919653992 |

|                    |                |              |             |             |
|--------------------|----------------|--------------|-------------|-------------|
| ENSMUSG00000057265 | Bbof1          | 0.012457634  | 0.80237423  | 0.919653992 |
| ENSMUSG00000075602 | Ly6a           | -0.019897927 | 0.802242262 | 0.919653992 |
| ENSMUSG00000024253 | Dync2li1       | 0.021653627  | 0.802464953 | 0.919673112 |
| ENSMUSG00000025422 | Agap2          | 0.016368386  | 0.802648042 | 0.919798075 |
| ENSMUSG00000021982 | Cdadc1         | 0.021763506  | 0.803039409 | 0.919907083 |
| ENSMUSG00000022033 | Pbk            | 0.020174551  | 0.802891406 | 0.919907083 |
| ENSMUSG00000050627 | Gpd1l          | -0.024324039 | 0.803017472 | 0.919907083 |
| ENSMUSG00000078570 | 1110065P20Rik  | 0.021814945  | 0.802874451 | 0.919907083 |
| ENSMUSG00000002068 | Ccne1          | -0.02145402  | 0.804130245 | 0.920030992 |
| ENSMUSG00000015305 | Sash1          | -0.014360254 | 0.804025303 | 0.920030992 |
| ENSMUSG00000018570 | 2810408A11Rik  | -0.01287159  | 0.804015392 | 0.920030992 |
| ENSMUSG00000020706 | Ftsj3          | 0.019573582  | 0.804088723 | 0.920030992 |
| ENSMUSG00000020712 | Tcam1          | -0.017127864 | 0.804120941 | 0.920030992 |
| ENSMUSG00000022899 | Slc15a2        | -0.007028209 | 0.804107786 | 0.920030992 |
| ENSMUSG00000024664 | Fads3          | -0.01105115  | 0.803503589 | 0.920030992 |
| ENSMUSG00000030748 | Ii4ra          | -0.017317827 | 0.803797597 | 0.920030992 |
| ENSMUSG00000031479 | Vps36          | 0.021392086  | 0.804043981 | 0.920030992 |
| ENSMUSG00000031563 | Wwc2           | -0.019894431 | 0.803710938 | 0.920030992 |
| ENSMUSG00000031887 | Tradd          | -0.021054846 | 0.803775958 | 0.920030992 |
| ENSMUSG00000032570 | Atp2c1         | -0.021308568 | 0.80382891  | 0.920030992 |
| ENSMUSG00000039005 | Tlr4           | 0.019097266  | 0.803245839 | 0.920030992 |
| ENSMUSG00000082475 | Gm7206         | 0.004017057  | 0.804184565 | 0.920030992 |
| ENSMUSG00000036292 | Gramd1c        | 0.012669615  | 0.80429011  | 0.920066997 |
| ENSMUSG00000029001 | Fbxo44         | -0.011885456 | 0.804649586 | 0.920308702 |
| ENSMUSG00000034544 | Rsrc1          | 0.021597661  | 0.804587161 | 0.920308702 |
| ENSMUSG00000040187 | Arntl2         | -0.011515312 | 0.804807271 | 0.920404301 |
| ENSMUSG00000001665 | Gstt3          | 0.020591678  | 0.805167586 | 0.920726396 |
| ENSMUSG00000014748 | Tex261         | -0.020334643 | 0.805403379 | 0.920726396 |
| ENSMUSG00000018548 | Trim37         | 0.021268516  | 0.80524772  | 0.920726396 |
| ENSMUSG00000037876 | Jmjd1c         | 0.020427106  | 0.805459546 | 0.920726396 |
| ENSMUSG00000107770 | Gm44126        | 0.018876966  | 0.805412311 | 0.920726396 |
| ENSMUSG00000051736 | Fam229b        | 0.016774956  | 0.805543534 | 0.920737668 |
| ENSMUSG00000085466 | Hmgn2l6        | 0.012708866  | 0.805676965 | 0.920805445 |
| ENSMUSG00000005267 | Zfp287         | -0.015460465 | 0.806091701 | 0.921025206 |
| ENSMUSG00000046947 | Adck2          | -0.019750351 | 0.806076805 | 0.921025206 |
| ENSMUSG00000069301 | Hist1h2ag      | 0.020431066  | 0.805946562 | 0.921025206 |
| ENSMUSG00000033306 | Lpp            | -0.011224871 | 0.806381633 | 0.921251142 |
| ENSMUSG00000040102 | Klhl42         | 0.015967085  | 0.80643778  | 0.921251142 |
| ENSMUSG00000039648 | Kyat1          | -0.02081298  | 0.806640321 | 0.921397777 |
| ENSMUSG00000048534 | Jaml           | 0.016653003  | 0.806880309 | 0.921587156 |
| ENSMUSG00000041491 | Cep78          | -0.020779144 | 0.806965765 | 0.921600015 |
| ENSMUSG00000069892 | 9930111J21Rik2 | -0.016571251 | 0.807074013 | 0.9216389   |
| ENSMUSG00000006335 | Tfpt           | 0.02137519   | 0.80738074  | 0.921645637 |

|                    |           |              |             |             |
|--------------------|-----------|--------------|-------------|-------------|
| ENSMUSG00000020496 | Rnf187    | 0.021078374  | 0.807300648 | 0.921645637 |
| ENSMUSG00000021713 | Ppwd1     | 0.020937259  | 0.807236365 | 0.921645637 |
| ENSMUSG00000024392 | Bag6      | 0.019598353  | 0.807316252 | 0.921645637 |
| ENSMUSG00000036552 | Ermard    | 0.021616752  | 0.807450916 | 0.921645637 |
| ENSMUSG00000070871 | Ccnyl1    | 0.016465202  | 0.807561398 | 0.921687046 |
| ENSMUSG00000029507 | Pus1      | 0.020749932  | 0.807646947 | 0.921699993 |
| ENSMUSG00000015143 | Actn1     | 0.010098873  | 0.809117751 | 0.921772611 |
| ENSMUSG00000019838 | Slc16a10  | -0.020498926 | 0.809120584 | 0.921772611 |
| ENSMUSG00000020264 | Slc36a2   | 0.020979126  | 0.808009502 | 0.921772611 |
| ENSMUSG00000021594 | Srd5a1    | 0.020039639  | 0.808971662 | 0.921772611 |
| ENSMUSG00000021704 | Mtx3      | 0.009445515  | 0.808762034 | 0.921772611 |
| ENSMUSG00000025498 | Irf7      | 0.011709302  | 0.808565283 | 0.921772611 |
| ENSMUSG00000028874 | Fgr       | -0.016748033 | 0.809055198 | 0.921772611 |
| ENSMUSG00000030104 | Edem1     | 0.020911935  | 0.807879061 | 0.921772611 |
| ENSMUSG00000030315 | Vgll4     | -0.020970048 | 0.809003916 | 0.921772611 |
| ENSMUSG00000031816 | Mthfsd    | 0.020983256  | 0.807937314 | 0.921772611 |
| ENSMUSG00000031825 | Crispld2  | -0.016304329 | 0.808201233 | 0.921772611 |
| ENSMUSG00000035944 | Ttc38     | 0.017643167  | 0.808095875 | 0.921772611 |
| ENSMUSG00000038485 | Socs7     | -0.013970307 | 0.809021014 | 0.921772611 |
| ENSMUSG00000039747 | Orai2     | 0.021296126  | 0.808029564 | 0.921772611 |
| ENSMUSG00000047412 | Zbtb44    | -0.022541623 | 0.808540874 | 0.921772611 |
| ENSMUSG00000047507 | Baiap3    | -0.016883069 | 0.808624184 | 0.921772611 |
| ENSMUSG00000061458 | Nol10     | 0.020971889  | 0.808841754 | 0.921772611 |
| ENSMUSG00000074513 | Arfip1    | 0.020686903  | 0.80862305  | 0.921772611 |
| ENSMUSG00000081640 | Rplp0-ps1 | 0.011047991  | 0.808282232 | 0.921772611 |
| ENSMUSG00000043241 | Upf2      | 0.02119781   | 0.809458568 | 0.922073081 |
| ENSMUSG00000069268 | Hist1h2bf | -0.011410055 | 0.809746208 | 0.922316153 |
| ENSMUSG00000032044 | Rpusd4    | 0.021202224  | 0.809840904 | 0.922339435 |
| ENSMUSG00000025332 | Kdm5c     | -0.020298306 | 0.810245585 | 0.922631134 |
| ENSMUSG00000038507 | Parp12    | 0.017751346  | 0.810237664 | 0.922631134 |
| ENSMUSG00000039994 | Timeless  | 0.019239005  | 0.81033286  | 0.922645931 |
| ENSMUSG00000113795 | Gm48119   | 0.013320003  | 0.810443927 | 0.922687811 |
| ENSMUSG00000029426 | Scarb2    | -0.020682574 | 0.810635141 | 0.922820922 |
| ENSMUSG00000020120 | Plek      | 0.017986563  | 0.810884104 | 0.923019745 |
| ENSMUSG00000059498 | Fcgr3     | -0.019781307 | 0.810977038 | 0.923040941 |
| ENSMUSG00000021598 | Med10     | 0.021136181  | 0.811063712 | 0.923055009 |
| ENSMUSG00000027630 | Tbl1xr1   | 0.021071261  | 0.811387654 | 0.923085368 |
| ENSMUSG00000038215 | Cep44     | -0.020305915 | 0.811326176 | 0.923085368 |
| ENSMUSG00000038312 | Edem2     | 0.018273915  | 0.811312617 | 0.923085368 |
| ENSMUSG00000073771 | Btbd19    | 0.02052089   | 0.811287918 | 0.923085368 |
| ENSMUSG00000032492 | Pth1r     | -0.009766652 | 0.812053882 | 0.923467567 |
| ENSMUSG00000035458 | Tnni3     | -0.010195685 | 0.811887151 | 0.923467567 |
| ENSMUSG00000039765 | Cc2d2a    | 0.014617184  | 0.811889248 | 0.923467567 |

|                    |          |              |             |             |
|--------------------|----------|--------------|-------------|-------------|
| ENSMUSG00000042312 | S100a13  | 0.021182199  | 0.812095342 | 0.923467567 |
| ENSMUSG00000111448 | Olfr912  | -0.012118435 | 0.81198222  | 0.923467567 |
| ENSMUSG00000006498 | Ptbp1    | 0.019407506  | 0.812398387 | 0.923474203 |
| ENSMUSG00000008167 | Fbxw9    | 0.019176853  | 0.81255046  | 0.923474203 |
| ENSMUSG00000022938 | Fam3b    | -0.0118669   | 0.812258693 | 0.923474203 |
| ENSMUSG00000031303 | Map3k15  | -0.01474636  | 0.812457707 | 0.923474203 |
| ENSMUSG00000050377 | Ii31ra   | 0.015243282  | 0.812363274 | 0.923474203 |
| ENSMUSG00000111834 | Gm40020  | -0.012011564 | 0.812495681 | 0.923474203 |
| ENSMUSG00000115279 | Gm49273  | 0.002078313  | 0.812621612 | 0.923474203 |
| ENSMUSG00000018171 | Vmp1     | -0.01922223  | 0.813263183 | 0.923603086 |
| ENSMUSG00000021981 | Cab39l   | 0.020494401  | 0.813201292 | 0.923603086 |
| ENSMUSG00000024905 | Tesmin   | -0.014871083 | 0.813040436 | 0.923603086 |
| ENSMUSG00000027955 | Fam198b  | -0.004943151 | 0.812951094 | 0.923603086 |
| ENSMUSG00000028572 | Hook1    | 0.019435727  | 0.813003778 | 0.923603086 |
| ENSMUSG00000056498 | Tmem154  | 0.020898368  | 0.813329889 | 0.923603086 |
| ENSMUSG00000059336 | Slc14a1  | -0.015748106 | 0.812823376 | 0.923603086 |
| ENSMUSG00000064341 | mt-Nd1   | -0.01781087  | 0.813309658 | 0.923603086 |
| ENSMUSG00000075273 | Ttc30b   | -0.015651936 | 0.81344101  | 0.923644829 |
| ENSMUSG00000039763 | Dnajc28  | -0.011867614 | 0.814070808 | 0.924275458 |
| ENSMUSG00000023992 | Trem2    | -0.019524074 | 0.814223979 | 0.92436487  |
| ENSMUSG00000049092 | Gpr137c  | -0.010868025 | 0.814431837 | 0.924516345 |
| ENSMUSG00000034543 | Morc2a   | -0.018090655 | 0.81451692  | 0.924528435 |
| ENSMUSG00000034570 | Inpp5j   | 0.014599822  | 0.814831291 | 0.924758552 |
| ENSMUSG00000044350 | Lacc1    | -0.01973318  | 0.814868557 | 0.924758552 |
| ENSMUSG00000074405 | Zfp865   | 0.010807642  | 0.815144014 | 0.924986643 |
| ENSMUSG00000037325 | Bbs7     | -0.014698164 | 0.815220792 | 0.924989263 |
| ENSMUSG00000025499 | Hras     | 0.019439562  | 0.815319337 | 0.925016577 |
| ENSMUSG00000001227 | Sema6b   | 0.016955123  | 0.815485192 | 0.925113355 |
| ENSMUSG00000020024 | Cep83    | -0.019998121 | 0.815553598 | 0.925113355 |
| ENSMUSG00000048175 | Asb8     | -0.019283726 | 0.815642884 | 0.925130149 |
| ENSMUSG00000020889 | Nr1d1    | -0.013123122 | 0.815970325 | 0.925163616 |
| ENSMUSG00000041225 | Arhgap12 | -0.010190996 | 0.815905437 | 0.925163616 |
| ENSMUSG00000047037 | Nipa1    | -0.018823229 | 0.815932308 | 0.925163616 |
| ENSMUSG00000048652 | Samd13   | -0.013341241 | 0.815968857 | 0.925163616 |
| ENSMUSG00000031446 | Cul4a    | -0.019330765 | 0.816395281 | 0.925470288 |
| ENSMUSG00000032409 | Atr      | -0.014744422 | 0.816464328 | 0.925470288 |
| ENSMUSG00000051007 | Gatd1    | 0.018768738  | 0.816424468 | 0.925470288 |
| ENSMUSG00000023079 | Gtf2ird1 | -0.020000238 | 0.817220678 | 0.926167944 |
| ENSMUSG00000030556 | Lrrc28   | 0.019224278  | 0.81722894  | 0.926167944 |
| ENSMUSG00000022946 | Dop1b    | 0.017524379  | 0.817806822 | 0.926616161 |
| ENSMUSG00000025040 | Fundc1   | 0.019935008  | 0.817864323 | 0.926616161 |
| ENSMUSG00000030653 | Gm45837  | -0.019331794 | 0.817922839 | 0.926616161 |
| ENSMUSG00000058881 | Zfp516   | -0.017129556 | 0.817788337 | 0.926616161 |

|                    |           |              |             |             |
|--------------------|-----------|--------------|-------------|-------------|
| ENSMUSG0000002504  | Slc9a3r2  | -0.019248506 | 0.81871247  | 0.926757955 |
| ENSMUSG00000014074 | Rnf168    | 0.020633715  | 0.818227535 | 0.926757955 |
| ENSMUSG00000020604 | Arsg      | -0.010306882 | 0.818449078 | 0.926757955 |
| ENSMUSG00000028465 | Tln1      | -0.019349475 | 0.818443868 | 0.926757955 |
| ENSMUSG00000031996 | Aplp2     | 0.020200918  | 0.818762797 | 0.926757955 |
| ENSMUSG00000033902 | Mapkbp1   | -0.010098686 | 0.81841864  | 0.926757955 |
| ENSMUSG00000049090 | Zadh2     | -0.019886541 | 0.818622016 | 0.926757955 |
| ENSMUSG00000056692 | D17Wsu92e | 0.020160696  | 0.818794123 | 0.926757955 |
| ENSMUSG00000059895 | Ptp4a3    | -0.017450076 | 0.818511029 | 0.926757955 |
| ENSMUSG00000084099 | Gm12929   | 0.014647574  | 0.818749902 | 0.926757955 |
| ENSMUSG00000021621 | Zcchc9    | -0.018645366 | 0.819291945 | 0.927152447 |
| ENSMUSG00000115602 | Gm7908    | 0.020159571  | 0.819268558 | 0.927152447 |
| ENSMUSG00000025372 | Baiap2    | 0.015182604  | 0.819843899 | 0.927692545 |
| ENSMUSG00000050565 | Tor1aip2  | -0.019520103 | 0.820076427 | 0.927871133 |
| ENSMUSG00000001418 | Gimp      | -0.016284817 | 0.82090975  | 0.928222121 |
| ENSMUSG00000022582 | Ly6g      | -0.011877268 | 0.820580317 | 0.928222121 |
| ENSMUSG00000022723 | Crybg3    | -0.015708676 | 0.820892353 | 0.928222121 |
| ENSMUSG00000026843 | Fubp3     | -0.017603242 | 0.820873961 | 0.928222121 |
| ENSMUSG00000036858 | Ptcra     | -0.012528133 | 0.820760832 | 0.928222121 |
| ENSMUSG00000041438 | Utp4      | 0.019880059  | 0.820907187 | 0.928222121 |
| ENSMUSG00000047514 | Tspyl1    | -0.019376237 | 0.820811548 | 0.928222121 |
| ENSMUSG00000107968 | Gm44419   | 0.019925067  | 0.821027797 | 0.928271096 |
| ENSMUSG00000033632 | AW554918  | -0.01872247  | 0.82114083  | 0.928314394 |
| ENSMUSG00000020630 | Rnaseh1   | 0.018322262  | 0.821689564 | 0.928692584 |
| ENSMUSG00000029570 | Lfng      | 0.009135812  | 0.821849198 | 0.928692584 |
| ENSMUSG00000049401 | Ogfr      | 0.021776844  | 0.821825778 | 0.928692584 |
| ENSMUSG00000056054 | S100a8    | 0.019674957  | 0.821644529 | 0.928692584 |
| ENSMUSG00000061589 | Dot1l     | 0.016496492  | 0.8218087   | 0.928692584 |
| ENSMUSG00000029449 | Rhof      | -0.00982445  | 0.822379185 | 0.929206937 |
| ENSMUSG00000030685 | Kctd13    | 0.019656324  | 0.822471586 | 0.929226812 |
| ENSMUSG00000031703 | Itfg1     | -0.01846186  | 0.822654101 | 0.929348485 |
| ENSMUSG00000038866 | Zcchc2    | 0.017764745  | 0.822794644 | 0.929422724 |
| ENSMUSG00000025815 | Dhtkd1    | 0.011622668  | 0.822954764 | 0.929465242 |
| ENSMUSG00000090733 | Rps27     | 0.018841638  | 0.822981944 | 0.929465242 |
| ENSMUSG00000008226 | Scrn3     | 0.018210597  | 0.823141676 | 0.929476614 |
| ENSMUSG00000026353 | Ubxn4     | 0.018009843  | 0.823078782 | 0.929476614 |
| ENSMUSG00000091076 | Vmn2r115  | -0.01028076  | 0.82363035  | 0.929943876 |
| ENSMUSG00000028134 | Ptbp2     | -0.015297011 | 0.823737724 | 0.929980574 |
| ENSMUSG00000044709 | Gemin7    | -0.017167798 | 0.823934272 | 0.930117931 |
| ENSMUSG00000057440 | Mpp7      | 0.018850756  | 0.824132834 | 0.930257536 |
| ENSMUSG00000027286 | Lrrc57    | 0.01952087   | 0.82429153  | 0.930352121 |
| ENSMUSG00000032571 | Pik3r4    | 0.014990822  | 0.824387877 | 0.930376324 |
| ENSMUSG00000002885 | Adgre5    | -0.016660117 | 0.825056415 | 0.930458643 |

|                    |               |              |             |             |
|--------------------|---------------|--------------|-------------|-------------|
| ENSMUSG00000020849 | Ywhae         | -0.019077772 | 0.825209919 | 0.930458643 |
| ENSMUSG00000022151 | Ttc33         | 0.019243168  | 0.824721879 | 0.930458643 |
| ENSMUSG00000026786 | Apbb1ip       | -0.018709899 | 0.824689273 | 0.930458643 |
| ENSMUSG00000029330 | Cds1          | -0.017395607 | 0.825039472 | 0.930458643 |
| ENSMUSG00000070713 | Gm10282       | 0.019510744  | 0.825147027 | 0.930458643 |
| ENSMUSG00000072214 | Sept5         | 0.011590402  | 0.825207279 | 0.930458643 |
| ENSMUSG00000074406 | Zfp628        | 0.01328694   | 0.824852725 | 0.930458643 |
| ENSMUSG00000084838 | Gm10241       | 0.017548315  | 0.824875365 | 0.930458643 |
| ENSMUSG00000107951 | Gm6210        | -0.01517983  | 0.825008088 | 0.930458643 |
| ENSMUSG00000020390 | Ube2b         | -0.018994996 | 0.82563628  | 0.930601473 |
| ENSMUSG00000022540 | Rogdi         | -0.018651875 | 0.825560779 | 0.930601473 |
| ENSMUSG00000027502 | Rtf2          | 0.017146863  | 0.82562452  | 0.930601473 |
| ENSMUSG00000037300 | Ttc13         | -0.018899638 | 0.8256258   | 0.930601473 |
| ENSMUSG00000113175 | Gm9973        | 0.012639827  | 0.825763346 | 0.930660241 |
| ENSMUSG00000018559 | Ctdnep1       | 0.019299473  | 0.82728277  | 0.93068375  |
| ENSMUSG00000018572 | Phf23         | -0.018191766 | 0.826590126 | 0.93068375  |
| ENSMUSG00000022130 | Tgds          | 0.017415875  | 0.827224808 | 0.93068375  |
| ENSMUSG00000022570 | Tsta3         | 0.018582959  | 0.826927757 | 0.93068375  |
| ENSMUSG00000024234 | Mtpap         | -0.017743181 | 0.827061666 | 0.93068375  |
| ENSMUSG00000024404 | Riok3         | 0.018624099  | 0.82722829  | 0.93068375  |
| ENSMUSG00000026709 | Dars2         | -0.018931807 | 0.826995334 | 0.93068375  |
| ENSMUSG00000027425 | Kat14         | -0.01709872  | 0.827261223 | 0.93068375  |
| ENSMUSG00000032322 | Pstpip1       | -0.019024073 | 0.827108504 | 0.93068375  |
| ENSMUSG00000039770 | Ypel5         | 0.019324677  | 0.826692707 | 0.93068375  |
| ENSMUSG00000041429 | Nthl1         | 0.019041541  | 0.826736227 | 0.93068375  |
| ENSMUSG00000042032 | Mat2b         | -0.016275865 | 0.827001627 | 0.93068375  |
| ENSMUSG00000048731 | Ggnbp1        | -0.011193706 | 0.826821385 | 0.93068375  |
| ENSMUSG00000050379 | Sept6         | -0.018940436 | 0.826853571 | 0.93068375  |
| ENSMUSG00000056598 | Drc3          | -0.012072975 | 0.826353969 | 0.93068375  |
| ENSMUSG00000056962 | Jmjd6         | -0.017582967 | 0.827073225 | 0.93068375  |
| ENSMUSG00000058351 | Smim4         | 0.01930734   | 0.826628356 | 0.93068375  |
| ENSMUSG00000066037 | Hnrnpr        | 0.018115548  | 0.826573101 | 0.93068375  |
| ENSMUSG00000070780 | Rbm47         | -0.012533978 | 0.827149769 | 0.93068375  |
| ENSMUSG00000097352 | C920009B18Rik | -0.011759517 | 0.826648616 | 0.93068375  |
| ENSMUSG00000005699 | Pard6a        | -0.018739976 | 0.827426595 | 0.930717521 |
| ENSMUSG00000028527 | Ak4           | 0.017593158  | 0.827511735 | 0.930717521 |
| ENSMUSG00000069939 | Gm12070       | 0.011810513  | 0.827537582 | 0.930717521 |
| ENSMUSG00000064302 | Clasp1        | 0.018433115  | 0.827666864 | 0.930778644 |
| ENSMUSG00000021497 | Txndc15       | -0.016602858 | 0.827955469 | 0.9308888   |
| ENSMUSG00000025209 | Twink         | 0.01920628   | 0.827989651 | 0.9308888   |
| ENSMUSG00000112122 | Gm47628       | -0.011468806 | 0.82784089  | 0.9308888   |
| ENSMUSG00000065968 | Ifitm7        | -0.016334958 | 0.828176297 | 0.931014371 |
| ENSMUSG00000017390 | Aldoc         | 0.008755807  | 0.828507516 | 0.931161742 |

|                    |          |              |             |             |
|--------------------|----------|--------------|-------------|-------------|
| ENSMUSG00000022205 | Sub1     | 0.018888434  | 0.828385945 | 0.931161742 |
| ENSMUSG00000022682 | Rrn3     | -0.018379463 | 0.82853229  | 0.931161742 |
| ENSMUSG00000028007 | Snx7     | 0.023921853  | 0.829127314 | 0.931746165 |
| ENSMUSG00000028332 | Hemgn    | -0.01104892  | 0.829260125 | 0.931752817 |
| ENSMUSG00000045996 | Polr2k   | 0.017800093  | 0.829283261 | 0.931752817 |
| ENSMUSG00000046404 | Yod1     | 0.018199892  | 0.829418935 | 0.931820966 |
| ENSMUSG00000020257 | Wdr82    | -0.015811926 | 0.82971975  | 0.931821792 |
| ENSMUSG00000026664 | Phyh     | 0.017913084  | 0.829719576 | 0.931821792 |
| ENSMUSG00000055994 | Nod2     | 0.011528943  | 0.829570923 | 0.931821792 |
| ENSMUSG00000078862 | Gm14326  | 0.016140389  | 0.829602119 | 0.931821792 |
| ENSMUSG00000024044 | Epb41l3  | -0.009020309 | 0.830096421 | 0.932082233 |
| ENSMUSG00000073705 | Cenps    | 0.01895095   | 0.830101736 | 0.932082233 |
| ENSMUSG00000033255 | Gm5134   | -0.012599401 | 0.830362739 | 0.932291022 |
| ENSMUSG00000039715 | Wdr34    | 0.019956565  | 0.830608399 | 0.93232951  |
| ENSMUSG00000039741 | Bahcc1   | -0.014687838 | 0.830483899 | 0.93232951  |
| ENSMUSG00000074862 | BC025920 | -0.01019771  | 0.830622201 | 0.93232951  |
| ENSMUSG00000029208 | Guf1     | 0.017911043  | 0.830998666 | 0.932416178 |
| ENSMUSG00000040331 | Nsmce4a  | 0.017142201  | 0.8307748   | 0.932416178 |
| ENSMUSG00000042369 | Rbm45    | 0.010279932  | 0.830999685 | 0.932416178 |
| ENSMUSG00000078636 | Gm7336   | -0.002351094 | 0.830971026 | 0.932416178 |
| ENSMUSG00000030814 | Bcl7c    | 0.026561761  | 0.831257251 | 0.93262093  |
| ENSMUSG00000060675 | Pla2g16  | -0.017917451 | 0.831551426 | 0.932866714 |
| ENSMUSG00000018076 | Med13l   | 0.017127108  | 0.831865987 | 0.933051058 |
| ENSMUSG00000046546 | Fam43a   | -0.016665777 | 0.831820431 | 0.933051058 |
| ENSMUSG00000026932 | Nacc2    | -0.011245406 | 0.832118722 | 0.933188738 |
| ENSMUSG00000031647 | Mfap3l   | -0.012399394 | 0.832138996 | 0.933188738 |
| ENSMUSG00000003423 | Pih1d1   | 0.017246507  | 0.832454048 | 0.93320503  |
| ENSMUSG00000022526 | Zfp251   | 0.015490759  | 0.832286677 | 0.93320503  |
| ENSMUSG00000022657 | Cd96     | -0.009929067 | 0.832379874 | 0.93320503  |
| ENSMUSG00000027487 | Cdk5rap1 | 0.015576862  | 0.832334484 | 0.93320503  |
| ENSMUSG00000023066 | Rttm     | 0.015496037  | 0.832545245 | 0.933223038 |
| ENSMUSG00000039678 | Tbc1d13  | -0.015007148 | 0.832672788 | 0.933281782 |
| ENSMUSG00000078879 | Zfp973   | -0.017576232 | 0.83285205  | 0.933324438 |
| ENSMUSG00000092329 | Gm20388  | -0.018168334 | 0.832861128 | 0.933324438 |
| ENSMUSG00000029802 | Abcg2    | -0.018262478 | 0.833276575 | 0.93370576  |
| ENSMUSG00000024077 | Strn     | -0.017811908 | 0.833397026 | 0.933722966 |
| ENSMUSG00000026816 | Gtf3c5   | -0.018404719 | 0.833442277 | 0.933722966 |
| ENSMUSG00000022434 | Fam118a  | -0.01798944  | 0.8335551   | 0.933765142 |
| ENSMUSG00000029578 | Wipi2    | -0.015640814 | 0.833660544 | 0.933799046 |
| ENSMUSG00000000561 | Wdr77    | 0.017862586  | 0.833789523 | 0.933822815 |
| ENSMUSG00000034674 | Tdg      | 0.018131827  | 0.833832126 | 0.933822815 |
| ENSMUSG00000005803 | Sqor     | 0.018451775  | 0.834336273 | 0.933843886 |
| ENSMUSG00000024312 | Wdr46    | -0.017457366 | 0.834328294 | 0.933843886 |

|                    |               |              |             |             |
|--------------------|---------------|--------------|-------------|-------------|
| ENSMUSG00000036529 | Sbf1          | -0.014436548 | 0.834232452 | 0.933843886 |
| ENSMUSG00000038773 | Kdm3b         | 0.018484665  | 0.834119945 | 0.933843886 |
| ENSMUSG00000038782 | 1700028J19Rik | 0.014770298  | 0.834011158 | 0.933843886 |
| ENSMUSG00000041650 | Pcca          | -0.018761825 | 0.83437722  | 0.933843886 |
| ENSMUSG00000100862 | Gm10925       | -0.014435614 | 0.834105299 | 0.933843886 |
| ENSMUSG00000027364 | Usp50         | -0.013664776 | 0.834715543 | 0.934125021 |
| ENSMUSG00000027933 | Ints3         | 0.017350655  | 0.83477882  | 0.934125021 |
| ENSMUSG00000030055 | Rab43         | -0.014664308 | 0.83527298  | 0.934571057 |
| ENSMUSG00000091086 | Rpl6l         | 0.014678767  | 0.835327902 | 0.934571057 |
| ENSMUSG00000024259 | Slc25a46      | 0.017397221  | 0.835768913 | 0.934980245 |
| ENSMUSG00000062353 | Gm15772       | 0.013934479  | 0.835988668 | 0.935141863 |
| ENSMUSG00000104377 | Gm37515       | 0.011118661  | 0.83642352  | 0.935544038 |
| ENSMUSG00000098950 | Gm28036       | -0.012641749 | 0.836571094 | 0.935624847 |
| ENSMUSG00000046573 | Lym4          | -0.017371737 | 0.836902284 | 0.93578663  |
| ENSMUSG00000057594 | Arl16         | 0.017763395  | 0.836863038 | 0.93578663  |
| ENSMUSG00000113684 | Gm48418       | -0.007333546 | 0.836941766 | 0.93578663  |
| ENSMUSG00000027405 | Nop56         | 0.01476825   | 0.837250803 | 0.93594925  |
| ENSMUSG00000033883 | D3Ertd254e    | -0.009153312 | 0.837337895 | 0.93594925  |
| ENSMUSG00000049470 | Aff4          | -0.015651263 | 0.837388617 | 0.93594925  |
| ENSMUSG00000080902 | Ywhaq-ps3     | -0.001968156 | 0.837278192 | 0.93594925  |
| ENSMUSG00000047155 | Cyp4x1        | -0.013737248 | 0.837583129 | 0.936082422 |
| ENSMUSG00000025723 | Nmb           | 0.012101647  | 0.837845871 | 0.936212532 |
| ENSMUSG00000030871 | Ears2         | 0.018105651  | 0.837850295 | 0.936212532 |
| ENSMUSG00000004263 | Atn1          | -0.010265577 | 0.838234755 | 0.936482887 |
| ENSMUSG00000028811 | Yars          | -0.016466885 | 0.838243035 | 0.936482887 |
| ENSMUSG00000020963 | Tshr          | -0.014721977 | 0.838476005 | 0.936546595 |
| ENSMUSG00000071303 | Rps8-ps1      | 0.007116493  | 0.838453372 | 0.936546595 |
| ENSMUSG00000078151 | Gm12226       | -0.014630425 | 0.838526261 | 0.936546595 |
| ENSMUSG00000029227 | Fip1l1        | 0.015710287  | 0.83883959  | 0.936812314 |
| ENSMUSG00000026864 | Hspa5         | 0.018350732  | 0.838927628 | 0.936826402 |
| ENSMUSG00000032555 | Topbp1        | 0.017849119  | 0.839044397 | 0.936872568 |
| ENSMUSG00000023026 | Dip2b         | 0.015809887  | 0.839213571 | 0.936893022 |
| ENSMUSG00000027550 | Lrrcc1        | 0.018197682  | 0.839162465 | 0.936893022 |
| ENSMUSG00000006675 | P4htm         | 0.007582076  | 0.839480698 | 0.937107015 |
| ENSMUSG00000031629 | Cenpu         | -0.015888848 | 0.839671644 | 0.937206208 |
| ENSMUSG00000038900 | Rpl12         | -0.015529002 | 0.839720465 | 0.937206208 |
| ENSMUSG00000028716 | Pdzk1ip1      | -0.01154857  | 0.840027879 | 0.937465075 |
| ENSMUSG00000023150 | Ivns1abp      | 0.016615057  | 0.84013592  | 0.937501416 |
| ENSMUSG00000024642 | Tle4          | -0.01725155  | 0.840283843 | 0.937536391 |
| ENSMUSG00000038542 | Pcid2         | 0.016866589  | 0.840318223 | 0.937536391 |
| ENSMUSG00000001249 | Hpn           | -0.011804869 | 0.840770543 | 0.937615821 |
| ENSMUSG00000018068 | Ints2         | -0.019377414 | 0.841130688 | 0.937615821 |
| ENSMUSG00000020698 | Cct6b         | -0.01098992  | 0.841037731 | 0.937615821 |

|                    |               |               |             |             |
|--------------------|---------------|---------------|-------------|-------------|
| ENSMUSG00000022102 | Dok2          | -0.013683628  | 0.840644214 | 0.937615821 |
| ENSMUSG00000022422 | Dscc1         | 0.016923443   | 0.841194974 | 0.937615821 |
| ENSMUSG00000035642 | Aamdc         | -0.017459144  | 0.840658306 | 0.937615821 |
| ENSMUSG00000039515 | Ptpa          | -0.01738156   | 0.841219766 | 0.937615821 |
| ENSMUSG00000046805 | Mpeg1         | -0.0171113952 | 0.841010451 | 0.937615821 |
| ENSMUSG00000056014 | A430033K04Rik | -0.015022647  | 0.840999202 | 0.937615821 |
| ENSMUSG00000084817 | Gm5526        | 0.014198411   | 0.840989776 | 0.937615821 |
| ENSMUSG00000105051 | Gm4248        | -0.009148267  | 0.841181305 | 0.937615821 |
| ENSMUSG00000022010 | Tsc22d1       | 0.014740224   | 0.841349254 | 0.937676006 |
| ENSMUSG00000032038 | St3gal4       | -0.017311466  | 0.841776391 | 0.937978657 |
| ENSMUSG00000039760 | Il22ra2       | -0.017299663  | 0.841847361 | 0.937978657 |
| ENSMUSG00000041629 | Fam104a       | -0.015987811  | 0.841728785 | 0.937978657 |
| ENSMUSG00000043183 | Simc1         | 0.012355554   | 0.841949607 | 0.938008437 |
| ENSMUSG00000021196 | Pfkip         | 0.014838      | 0.842729035 | 0.938287678 |
| ENSMUSG00000028405 | Aco1          | -0.015961903  | 0.842616253 | 0.938287678 |
| ENSMUSG00000030600 | Lrfn1         | 0.00875017    | 0.842522209 | 0.938287678 |
| ENSMUSG00000031758 | Cdyl2         | -0.015874791  | 0.842527669 | 0.938287678 |
| ENSMUSG00000032402 | Smad3         | -0.010370034  | 0.842308902 | 0.938287678 |
| ENSMUSG00000050621 | Rps27rt       | 0.017286208   | 0.842664536 | 0.938287678 |
| ENSMUSG00000068856 | Sf3b4         | -0.016209318  | 0.842382307 | 0.938287678 |
| ENSMUSG00000003380 | Rabac1        | 0.011667961   | 0.842938972 | 0.938378481 |
| ENSMUSG00000020212 | Mdm1          | 0.0149347     | 0.843037233 | 0.938378481 |
| ENSMUSG00000060594 | Layn          | -0.016792059  | 0.842969501 | 0.938378481 |
| ENSMUSG00000043895 | S1pr2         | 0.014906375   | 0.843129559 | 0.938397155 |
| ENSMUSG00000052949 | Rnf157        | -0.013309245  | 0.843459778 | 0.938680576 |
| ENSMUSG00000021510 | Zfp729a       | 0.013075974   | 0.843580318 | 0.938721055 |
| ENSMUSG00000038080 | Kdm1b         | -0.016270085  | 0.843722877 | 0.938721055 |
| ENSMUSG00000078864 | Gm14322       | 0.007064622   | 0.843660609 | 0.938721055 |
| ENSMUSG00000112435 | Gm47965       | 0.011539122   | 0.843843686 | 0.938771377 |
| ENSMUSG00000031803 | B3gnt3        | -0.013335689  | 0.843965346 | 0.938786532 |
| ENSMUSG00000044786 | Zfp36         | 0.015663446   | 0.844065375 | 0.938786532 |
| ENSMUSG00000094410 | Gm38394       | 0.008065035   | 0.84408405  | 0.938786532 |
| ENSMUSG00000044221 | Grsf1         | -0.017017248  | 0.844545375 | 0.939215517 |
| ENSMUSG00000016528 | Mapkapk2      | -0.016227135  | 0.8453005   | 0.939391324 |
| ENSMUSG00000018362 | Kpna2         | -0.01261092   | 0.845304774 | 0.939391324 |
| ENSMUSG00000020455 | Trim11        | -0.016618943  | 0.844950475 | 0.939391324 |
| ENSMUSG00000022820 | Ndufb4        | 0.017274837   | 0.844842742 | 0.939391324 |
| ENSMUSG00000026727 | Rsu1          | 0.015914039   | 0.845270715 | 0.939391324 |
| ENSMUSG00000027162 | Lin7c         | 0.016554051   | 0.844980396 | 0.939391324 |
| ENSMUSG00000041037 | Irgq          | 0.012580608   | 0.845194659 | 0.939391324 |
| ENSMUSG00000041231 | Ublcp1        | -0.01239096   | 0.845364753 | 0.939391324 |
| ENSMUSG00000056214 | Pard6g        | -0.012789324  | 0.845384125 | 0.939391324 |
| ENSMUSG00000028825 | Rhd           | -0.009016838  | 0.845630258 | 0.939412704 |

|                    |             |              |             |             |
|--------------------|-------------|--------------|-------------|-------------|
| ENSMUSG00000039105 | Atp6v1g1    | 0.014538355  | 0.845594715 | 0.939412704 |
| ENSMUSG00000044600 | Smim7       | 0.016241663  | 0.845552253 | 0.939412704 |
| ENSMUSG00000040950 | Mgl2        | -0.017087767 | 0.845764414 | 0.939477713 |
| ENSMUSG00000046020 | Pofut1      | -0.01663639  | 0.846117604 | 0.939785993 |
| ENSMUSG00000026439 | Rbbp5       | -0.01598926  | 0.846576459 | 0.93979142  |
| ENSMUSG00000027433 | Xrn2        | 0.016969029  | 0.846429719 | 0.93979142  |
| ENSMUSG00000030088 | Aldh1l1     | 0.011069251  | 0.846372862 | 0.93979142  |
| ENSMUSG00000038393 | Txnip       | -0.014187984 | 0.846428488 | 0.93979142  |
| ENSMUSG00000049871 | Nlrc3       | -0.016130981 | 0.846566097 | 0.93979142  |
| ENSMUSG00000096795 | Zfp433      | 0.013635576  | 0.846547233 | 0.93979142  |
| ENSMUSG00000015016 | Acsf3       | -0.010991148 | 0.847134584 | 0.940055208 |
| ENSMUSG00000025243 | Slc6a20b    | 0.008721563  | 0.846944327 | 0.940055208 |
| ENSMUSG00000042682 | Selenok     | -0.015689415 | 0.847008586 | 0.940055208 |
| ENSMUSG00000052921 | Arhgef15    | 0.010104977  | 0.847192496 | 0.940055208 |
| ENSMUSG00000062310 | Glrp1       | 0.01450997   | 0.847192089 | 0.940055208 |
| ENSMUSG00000038122 | Tbc1d32     | -0.012892151 | 0.847321666 | 0.940114553 |
| ENSMUSG00000025758 | Plk4        | -0.01478225  | 0.847757595 | 0.940262264 |
| ENSMUSG00000026980 | Ly75        | 0.014515523  | 0.847749987 | 0.940262264 |
| ENSMUSG00000043801 | Oaz1-ps     | -0.016320769 | 0.847637123 | 0.940262264 |
| ENSMUSG00000096054 | Syne1       | -0.014359165 | 0.847571275 | 0.940262264 |
| ENSMUSG00000031482 | Slc25a15    | 0.01698842   | 0.848152656 | 0.940532465 |
| ENSMUSG00000116875 | Morf4l1-ps1 | -0.01642617  | 0.84814201  | 0.940532465 |
| ENSMUSG00000001827 | Folr1       | 0.010186055  | 0.848505582 | 0.940755854 |
| ENSMUSG00000011148 | Adssl1      | -0.016565822 | 0.848440182 | 0.940755854 |
| ENSMUSG00000074793 | Hspa12b     | -0.011611371 | 0.848649871 | 0.94083185  |
| ENSMUSG00000034681 | Rnps1       | 0.015421671  | 0.848881158 | 0.941004271 |
| ENSMUSG00000097854 | Gm26602     | 0.016404432  | 0.84918547  | 0.941257605 |
| ENSMUSG00000049504 | Proser1     | 0.015315776  | 0.849308885 | 0.9413104   |
| ENSMUSG00000023088 | Abcc1       | 0.01145445   | 0.849497014 | 0.941434904 |
| ENSMUSG00000027111 | Itga6       | 0.016761887  | 0.84975159  | 0.941589227 |
| ENSMUSG00000028292 | Rars2       | 0.016765131  | 0.849904995 | 0.941589227 |
| ENSMUSG00000035125 | Gcfc2       | -0.015636076 | 0.84993949  | 0.941589227 |
| ENSMUSG00000111356 | Rpl32l      | -0.009695427 | 0.849803621 | 0.941589227 |
| ENSMUSG00000029730 | Mcm7        | 0.016032047  | 0.850394634 | 0.941827746 |
| ENSMUSG00000032860 | P2ry2       | 0.016310464  | 0.850616571 | 0.941827746 |
| ENSMUSG00000037826 | Ppm1k       | -0.007207197 | 0.850761397 | 0.941827746 |
| ENSMUSG00000046876 | Atxn1       | -0.013517492 | 0.850416075 | 0.941827746 |
| ENSMUSG00000052934 | Fbxo31      | -0.016363159 | 0.850333547 | 0.941827746 |
| ENSMUSG00000053644 | Aldh7a1     | 0.016279956  | 0.850673303 | 0.941827746 |
| ENSMUSG00000095234 | Gm21586     | 0.010641421  | 0.850708513 | 0.941827746 |
| ENSMUSG00000097829 | Myadm       | -0.004995194 | 0.850725425 | 0.941827746 |
| ENSMUSG00000024338 | Psmb8       | 0.01684201   | 0.850988289 | 0.941957065 |
| ENSMUSG00000043154 | Ppp2r3a     | -0.012112543 | 0.851029884 | 0.941957065 |

|                    |            |              |             |             |
|--------------------|------------|--------------|-------------|-------------|
| ENSMUSG00000026480 | Ncf2       | -0.014223761 | 0.851245834 | 0.942028199 |
| ENSMUSG00000115987 | Vps28      | 0.016172143  | 0.851188206 | 0.942028199 |
| ENSMUSG00000040715 | Rsc1a1     | -0.012852732 | 0.851485631 | 0.942209623 |
| ENSMUSG00000016181 | Diexf      | -0.010709815 | 0.852407314 | 0.94247793  |
| ENSMUSG00000020952 | Scfd1      | -0.014744124 | 0.852176276 | 0.94247793  |
| ENSMUSG00000023905 | Tnfrsf12a  | 0.012797038  | 0.852744368 | 0.94247793  |
| ENSMUSG00000039879 | Heca       | 0.016132114  | 0.852694017 | 0.94247793  |
| ENSMUSG00000040339 | Fam102b    | 0.01637194   | 0.851823575 | 0.94247793  |
| ENSMUSG00000049414 | Gm5417     | -0.011954279 | 0.852683717 | 0.94247793  |
| ENSMUSG00000054733 | Msra       | 0.013723308  | 0.852790391 | 0.94247793  |
| ENSMUSG00000058230 | Arhgap35   | 0.011922926  | 0.852711932 | 0.94247793  |
| ENSMUSG00000061079 | Zfp143     | -0.015528327 | 0.852196376 | 0.94247793  |
| ENSMUSG00000061878 | Sphk1      | -0.004591322 | 0.852507954 | 0.94247793  |
| ENSMUSG00000078652 | Psme3      | -0.013995131 | 0.852389804 | 0.94247793  |
| ENSMUSG00000082292 | Gm12250    | 0.015021654  | 0.852470222 | 0.94247793  |
| ENSMUSG00000086436 | Gm13690    | -0.00610417  | 0.852226502 | 0.94247793  |
| ENSMUSG00000106918 | Mrpl33     | -0.017192945 | 0.852709663 | 0.94247793  |
| ENSMUSG00000060981 | Hist1h4h   | 0.00878455   | 0.853095379 | 0.942731113 |
| ENSMUSG00000048100 | Taf13      | -0.015631249 | 0.853182754 | 0.942743794 |
| ENSMUSG00000035936 | Aldh5a1    | 0.012659092  | 0.85345428  | 0.942876066 |
| ENSMUSG00000040520 | Manea      | 0.009912952  | 0.853439789 | 0.942876066 |
| ENSMUSG00000079808 | AC168977.1 | -0.011091774 | 0.853841138 | 0.943219563 |
| ENSMUSG00000039096 | Rsad1      | 0.013405654  | 0.854129876 | 0.943454619 |
| ENSMUSG00000032515 | Csrnp1     | -0.009051927 | 0.854299365 | 0.943557924 |
| ENSMUSG00000043061 | Tmem18     | 0.01620899   | 0.85437541  | 0.943558012 |
| ENSMUSG00000029472 | Anapc5     | 0.015477702  | 0.854932227 | 0.944089011 |
| ENSMUSG00000073563 | Csnk1g3    | 0.015829027  | 0.855080523 | 0.94416883  |
| ENSMUSG00000020253 | Ppm1m      | 0.015290449  | 0.855421243 | 0.944240981 |
| ENSMUSG00000038301 | Snx10      | -0.015861052 | 0.855449944 | 0.944240981 |
| ENSMUSG00000043157 | Arl11      | 0.016187983  | 0.855224905 | 0.944240981 |
| ENSMUSG00000079450 | Cldn34c1   | 0.0141336    | 0.855413675 | 0.944240981 |
| ENSMUSG00000060377 | Rpl36a-ps1 | 0.008845454  | 0.855655998 | 0.944384499 |
| ENSMUSG00000039849 | Pcif1      | 0.016075519  | 0.85611993  | 0.944801758 |
| ENSMUSG00000056228 | Cars2      | 0.016076888  | 0.856186184 | 0.944801758 |
| ENSMUSG00000020271 | Fbxw11     | -0.015065838 | 0.856355619 | 0.944904783 |
| ENSMUSG00000020515 | Cnot8      | -0.012789318 | 0.856808587 | 0.945175534 |
| ENSMUSG00000022848 | Dirc2      | -0.01566838  | 0.856829282 | 0.945175534 |
| ENSMUSG00000107023 | Gm42715    | 0.014730131  | 0.856764151 | 0.945175534 |
| ENSMUSG00000028901 | Gmeb1      | 0.015499077  | 0.85690734  | 0.945177699 |
| ENSMUSG00000028967 | Errfi1     | -0.006923847 | 0.857186216 | 0.945401349 |
| ENSMUSG00000026466 | Tor1aip1   | 0.026322862  | 0.857338898 | 0.94548579  |
| ENSMUSG00000023259 | Slc26a6    | -0.014635677 | 0.857545568 | 0.945545806 |
| ENSMUSG00000110165 | Gm4032     | 0.012654863  | 0.857539484 | 0.945545806 |

|                    |               |              |             |             |
|--------------------|---------------|--------------|-------------|-------------|
| ENSMUSG00000015522 | Arnt          | -0.011073309 | 0.857682462 | 0.9455673   |
| ENSMUSG00000037058 | Paip2         | -0.015564376 | 0.857717315 | 0.9455673   |
| ENSMUSG00000063902 | Gm7964        | 0.008315726  | 0.857868648 | 0.945574303 |
| ENSMUSG00000084067 | Gm14269       | 0.017373716  | 0.857875921 | 0.945574303 |
| ENSMUSG00000096145 | Vkorc1        | -0.013940555 | 0.857952903 | 0.945575245 |
| ENSMUSG00000101523 | Gm10031       | -0.00478585  | 0.85803259  | 0.945579167 |
| ENSMUSG00000074582 | Arfgef2       | 0.012182736  | 0.85838115  | 0.94587937  |
| ENSMUSG00000039990 | Edrf1         | -0.014758995 | 0.858518842 | 0.945947178 |
| ENSMUSG00000002617 | Zfp40         | 0.012972665  | 0.858684819 | 0.945965667 |
| ENSMUSG00000058503 | Fam133b       | -0.013762706 | 0.858687939 | 0.945965667 |
| ENSMUSG00000035413 | Tmem98        | -0.012018958 | 0.858837515 | 0.946046538 |
| ENSMUSG00000032320 | Rcn2          | -0.012520403 | 0.859235244 | 0.946316808 |
| ENSMUSG00000042502 | Cd2bp2        | -0.015404348 | 0.85923395  | 0.946316808 |
| ENSMUSG00000028980 | H6pd          | 0.014397086  | 0.859441568 | 0.946341451 |
| ENSMUSG00000035649 | Zcchc7        | 0.015445305  | 0.859486185 | 0.946341451 |
| ENSMUSG00000039660 | Spout1        | -0.014550514 | 0.859458906 | 0.946341451 |
| ENSMUSG00000032392 | Parp16        | -0.013435575 | 0.859823282 | 0.9466287   |
| ENSMUSG00000073079 | Srp54a        | -0.013490847 | 0.860156765 | 0.946911918 |
| ENSMUSG00000042569 | Dhrs7b        | 0.013882408  | 0.860385085 | 0.946962596 |
| ENSMUSG00000053684 | BC048403      | 0.01276153   | 0.860431516 | 0.946962596 |
| ENSMUSG00000061461 | Smim20        | 0.015081041  | 0.860343431 | 0.946962596 |
| ENSMUSG00000003762 | Coq8b         | 0.015568566  | 0.860923049 | 0.946990857 |
| ENSMUSG00000004631 | Sgce          | -0.007484287 | 0.860748296 | 0.946990857 |
| ENSMUSG00000016487 | Ppfibp1       | 0.014215071  | 0.860925075 | 0.946990857 |
| ENSMUSG00000021003 | Galc          | -0.014337897 | 0.860964894 | 0.946990857 |
| ENSMUSG00000026126 | Ptpn18        | 0.015413383  | 0.860739664 | 0.946990857 |
| ENSMUSG00000035898 | Uba6          | 0.013555052  | 0.860755772 | 0.946990857 |
| ENSMUSG00000045294 | Insig1        | -0.010891887 | 0.860990883 | 0.946990857 |
| ENSMUSG00000025059 | Gk            | -0.015026643 | 0.861273271 | 0.947107268 |
| ENSMUSG00000033209 | Ttc28         | -0.008914838 | 0.861283072 | 0.947107268 |
| ENSMUSG00000068130 | Zfp442        | 0.011384826  | 0.861325473 | 0.947107268 |
| ENSMUSG00000009640 | Dmap1         | 0.013890467  | 0.86143968  | 0.947149001 |
| ENSMUSG00000056673 | Kdm5d         | -0.010676069 | 0.861630535 | 0.947274994 |
| ENSMUSG00000019774 | Mtrf1l        | 0.014968764  | 0.861873141 | 0.947451148 |
| ENSMUSG00000035601 | Trmt10b       | -0.015040864 | 0.861943319 | 0.947451148 |
| ENSMUSG00000014956 | Ppp1cb        | 0.015593695  | 0.862087816 | 0.947526127 |
| ENSMUSG00000020677 | Ddx52         | -0.015769455 | 0.862455912 | 0.947823634 |
| ENSMUSG00000044551 | 9930012K11Rik | 0.01402184   | 0.862587421 | 0.947823634 |
| ENSMUSG00000105944 | Gm5075        | 0.006757292  | 0.86251347  | 0.947823634 |
| ENSMUSG00000059439 | Bcas3         | -0.012440118 | 0.862710447 | 0.947874963 |
| ENSMUSG00000036819 | Jmjd4         | 0.0146198    | 0.863063301 | 0.948097008 |
| ENSMUSG00000056131 | Pgm3          | 0.013936893  | 0.863065202 | 0.948097008 |
| ENSMUSG00000020393 | Kremen1       | -0.011981539 | 0.863390205 | 0.948346728 |

|                    |               |              |             |             |
|--------------------|---------------|--------------|-------------|-------------|
| ENSMUSG00000099702 | Gm29013       | -0.008627225 | 0.863445225 | 0.948346728 |
| ENSMUSG00000040661 | Rad54l2       | -0.012528551 | 0.863531129 | 0.94835722  |
| ENSMUSG00000006800 | Sulf2         | -0.005982453 | 0.863883992 | 0.948409322 |
| ENSMUSG00000007659 | Bcl2l1        | -0.013330221 | 0.863807217 | 0.948409322 |
| ENSMUSG00000041881 | Ndufa7        | -0.014648183 | 0.863659849 | 0.948409322 |
| ENSMUSG00000042105 | Inpp5f        | -0.014212223 | 0.863867197 | 0.948409322 |
| ENSMUSG00000096010 | Hist4h4       | 0.007881821  | 0.864019875 | 0.948474668 |
| ENSMUSG00000032667 | Pon2          | -0.014380374 | 0.864177465 | 0.948563829 |
| ENSMUSG00000073893 | Olfr472       | 0.008506048  | 0.864821113 | 0.949102584 |
| ENSMUSG00000109771 | Gm35315       | -0.01024722  | 0.86475903  | 0.949102584 |
| ENSMUSG00000025583 | Rptor         | -0.012366074 | 0.864966604 | 0.949178389 |
| ENSMUSG00000034993 | Vat1          | 0.01298508   | 0.865289978 | 0.949365499 |
| ENSMUSG00000050240 | Hic2          | 0.009880589  | 0.865247701 | 0.949365499 |
| ENSMUSG00000002104 | Rapsn         | -0.014690155 | 0.865829573 | 0.949547443 |
| ENSMUSG00000020898 | Ctc1          | -0.014444988 | 0.865744961 | 0.949547443 |
| ENSMUSG00000026623 | Lpgat1        | -0.014294009 | 0.865568448 | 0.949547443 |
| ENSMUSG00000058773 | Hist1h1b      | 0.015037062  | 0.865845995 | 0.949547443 |
| ENSMUSG00000060279 | Ap2a1         | -0.011611831 | 0.865826512 | 0.949547443 |
| ENSMUSG00000073609 | D2hgdh        | 0.01065131   | 0.865914491 | 0.949547443 |
| ENSMUSG00000050786 | Ccdc126       | 0.014503818  | 0.866178327 | 0.949752913 |
| ENSMUSG00000035049 | Rrp12         | 0.01501733   | 0.866551603 | 0.950078336 |
| ENSMUSG00000017188 | Coa3          | 0.014752559  | 0.866787491 | 0.950116837 |
| ENSMUSG00000020021 | Fgd6          | -0.004478753 | 0.866903688 | 0.950116837 |
| ENSMUSG00000024695 | Zfp91         | 0.01445067   | 0.867157082 | 0.950116837 |
| ENSMUSG00000030421 | Uri1          | 0.013005038  | 0.867134715 | 0.950116837 |
| ENSMUSG00000031105 | Slc25a14      | 0.014412433  | 0.866799595 | 0.950116837 |
| ENSMUSG00000039410 | Prdm16        | 0.010856669  | 0.867159882 | 0.950116837 |
| ENSMUSG00000041408 | Wapl          | 0.014257745  | 0.867193103 | 0.950116837 |
| ENSMUSG00000067377 | Tspan6        | 0.006921643  | 0.867198662 | 0.950116837 |
| ENSMUSG00000030802 | Bckdk         | 0.01230433   | 0.867370926 | 0.950221756 |
| ENSMUSG00000021375 | Kif13a        | 0.013351819  | 0.867531332 | 0.950313667 |
| ENSMUSG00000030282 | Cmas          | -0.014117447 | 0.86768247  | 0.95039541  |
| ENSMUSG00000066043 | Phactr4       | 0.012211332  | 0.867907576 | 0.950558152 |
| ENSMUSG00000073405 | H2-T-ps       | 0.008922908  | 0.868003443 | 0.95057933  |
| ENSMUSG00000034998 | Foxn2         | 0.01427056   | 0.868850766 | 0.95135634  |
| ENSMUSG00000037103 | Dcaf15        | 0.014615705  | 0.868943156 | 0.95135634  |
| ENSMUSG00000043004 | Gng2          | -0.0138764   | 0.868882573 | 0.95135634  |
| ENSMUSG00000097129 | 4930507D05Rik | 0.008270263  | 0.869019325 | 0.95135634  |
| ENSMUSG00000001998 | Ap4e1         | -0.014123007 | 0.86933713  | 0.951590867 |
| ENSMUSG00000025340 | Rabgef1       | -0.013911062 | 0.869386777 | 0.951590867 |
| ENSMUSG00000064289 | Tank          | 0.01374381   | 0.869502046 | 0.951633176 |
| ENSMUSG00000001482 | Def8          | -0.013932626 | 0.869641055 | 0.951701458 |
| ENSMUSG00000020409 | Slu7          | -0.013776373 | 0.869994439 | 0.951788571 |

|                    |                |              |             |             |
|--------------------|----------------|--------------|-------------|-------------|
| ENSMUSG00000022440 | C1qtnf6        | -0.009860505 | 0.870333676 | 0.951788571 |
| ENSMUSG00000028629 | Exo5           | -0.012601617 | 0.870079443 | 0.951788571 |
| ENSMUSG00000040270 | Bach2          | -0.006202506 | 0.870284776 | 0.951788571 |
| ENSMUSG00000043991 | Pura           | -0.014045611 | 0.870203446 | 0.951788571 |
| ENSMUSG00000044730 | 9930104L06Rik  | 0.014098685  | 0.870146434 | 0.951788571 |
| ENSMUSG00000049299 | Trappc1        | 0.013370301  | 0.870069013 | 0.951788571 |
| ENSMUSG00000071302 | 2610044O15Rik8 | 0.01324118   | 0.870069686 | 0.951788571 |
| ENSMUSG00000022945 | Chaf1b         | 0.014299026  | 0.870894089 | 0.952101573 |
| ENSMUSG00000024986 | Hhex           | 0.013994358  | 0.871207684 | 0.952101573 |
| ENSMUSG00000026707 | Nsun6          | -0.013209548 | 0.871436167 | 0.952101573 |
| ENSMUSG00000028152 | Tspan5         | -0.01343409  | 0.871411256 | 0.952101573 |
| ENSMUSG00000031527 | Eri1           | 0.014323402  | 0.871015405 | 0.952101573 |
| ENSMUSG00000034354 | Mtmr3          | -0.014053503 | 0.871259384 | 0.952101573 |
| ENSMUSG00000035539 | Ccdc180        | -0.011800258 | 0.871356787 | 0.952101573 |
| ENSMUSG00000039210 | Gpatch2        | 0.014008692  | 0.870950835 | 0.952101573 |
| ENSMUSG00000045896 | Paip2b         | -0.011535614 | 0.871497954 | 0.952101573 |
| ENSMUSG00000054469 | Lclat1         | -0.009571675 | 0.871053917 | 0.952101573 |
| ENSMUSG00000072980 | Oip5           | 0.012919799  | 0.871539722 | 0.952101573 |
| ENSMUSG00000090266 | Mettl23        | -0.013538477 | 0.871388434 | 0.952101573 |
| ENSMUSG00000021044 | Adck1          | -0.014959991 | 0.871719893 | 0.95221465  |
| ENSMUSG00000022194 | Pabpn1         | -0.015124885 | 0.872156356 | 0.952536614 |
| ENSMUSG00000041716 | Gm20604        | 0.014117781  | 0.872244703 | 0.952536614 |
| ENSMUSG00000079445 | B3gnt7         | -0.009822304 | 0.872237471 | 0.952536614 |
| ENSMUSG00000022360 | Atad2          | 0.013251985  | 0.872380616 | 0.952601286 |
| ENSMUSG00000031353 | Rbbp7          | 0.02369498   | 0.872610261 | 0.952684544 |
| ENSMUSG00000036941 | Elac1          | 0.01291522   | 0.872579436 | 0.952684544 |
| ENSMUSG00000040907 | Atp1a3         | -0.012955302 | 0.872713364 | 0.952705333 |
| ENSMUSG00000051705 | Senp8          | 0.012845086  | 0.872782706 | 0.952705333 |
| ENSMUSG00000019878 | Hsf2           | -0.007115566 | 0.873413657 | 0.95322652  |
| ENSMUSG00000097487 | Ptges3l        | -0.010375007 | 0.873384114 | 0.95322652  |
| ENSMUSG00000032637 | Atxn2l         | -0.011946111 | 0.87357792  | 0.95323828  |
| ENSMUSG00000032679 | Cd59a          | -0.010671961 | 0.873503131 | 0.95323828  |
| ENSMUSG00000056201 | Cfl1           | -0.012279264 | 0.873671019 | 0.953256125 |
| ENSMUSG00000025220 | Mgea5          | 0.013838217  | 0.873823856 | 0.95333914  |
| ENSMUSG00000047866 | Lonp2          | -0.012536451 | 0.873920552 | 0.953360897 |
| ENSMUSG00000039901 | Armh3          | -0.013728821 | 0.874084362 | 0.953455859 |
| ENSMUSG00000054520 | Sh3bp2         | 0.007880643  | 0.874378748 | 0.953693224 |
| ENSMUSG00000027222 | Pex16          | 0.013958748  | 0.874691718 | 0.953950815 |
| ENSMUSG00000090607 | Gm17052        | 0.009929206  | 0.874848123 | 0.954037624 |
| ENSMUSG00000034973 | Dop1a          | -0.010982235 | 0.875371932 | 0.954281864 |
| ENSMUSG00000037211 | Spry1          | -0.009769045 | 0.875255815 | 0.954281864 |
| ENSMUSG00000064368 | mt-Nd6         | -0.011576029 | 0.875299431 | 0.954281864 |
| ENSMUSG00000071054 | Safb           | -0.013145685 | 0.875379403 | 0.954281864 |

|                    |          |              |             |             |
|--------------------|----------|--------------|-------------|-------------|
| ENSMUSG0000003824  | Syce2    | -0.0131593   | 0.875582216 | 0.954351423 |
| ENSMUSG00000019189 | Rnf145   | 0.012701165  | 0.876252094 | 0.954351423 |
| ENSMUSG00000022604 | Cep97    | 0.013725453  | 0.876174665 | 0.954351423 |
| ENSMUSG00000029233 | Srd5a3   | -0.013681128 | 0.876108332 | 0.954351423 |
| ENSMUSG00000032578 | Cish     | 0.004834419  | 0.875980798 | 0.954351423 |
| ENSMUSG00000034574 | Daam1    | -0.010348857 | 0.875772424 | 0.954351423 |
| ENSMUSG00000043090 | Zfp866   | -0.011796878 | 0.876336581 | 0.954351423 |
| ENSMUSG00000045983 | Eif4g1   | -0.013671443 | 0.876332353 | 0.954351423 |
| ENSMUSG00000060441 | Trim5    | -0.012849851 | 0.875724822 | 0.954351423 |
| ENSMUSG00000070522 | Gm6505   | -0.01028736  | 0.876365215 | 0.954351423 |
| ENSMUSG00000073700 | Klhl21   | 0.013557084  | 0.876093469 | 0.954351423 |
| ENSMUSG00000091572 | Vmn2r3   | 0.008575942  | 0.876079216 | 0.954351423 |
| ENSMUSG00000038102 | Trappc11 | 0.013052165  | 0.876674163 | 0.954530766 |
| ENSMUSG00000066900 | Suds3    | -0.012577699 | 0.876683599 | 0.954530766 |
| ENSMUSG00000008496 | Pou2f2   | -0.012519668 | 0.876973585 | 0.954624307 |
| ENSMUSG00000031103 | Elf4     | 0.011592572  | 0.876890732 | 0.954624307 |
| ENSMUSG00000031352 | Hccs     | 0.013629821  | 0.877000078 | 0.954624307 |
| ENSMUSG00000020737 | Jpt1     | 0.011300778  | 0.877967009 | 0.954930817 |
| ENSMUSG00000020910 | Adprm    | -0.012665645 | 0.877866804 | 0.954930817 |
| ENSMUSG00000021007 | Spata7   | -0.013351026 | 0.877834162 | 0.954930817 |
| ENSMUSG00000028641 | P3h1     | 0.012569691  | 0.877643402 | 0.954930817 |
| ENSMUSG00000032643 | Fhl3     | -0.010020568 | 0.87777455  | 0.954930817 |
| ENSMUSG00000037110 | Ralgapa2 | 0.006914305  | 0.878037396 | 0.954930817 |
| ENSMUSG00000056260 | Lrif1    | 0.012672578  | 0.877701415 | 0.954930817 |
| ENSMUSG00000069072 | Slc7a14  | -0.005385173 | 0.877657618 | 0.954930817 |
| ENSMUSG00000091013 | Vmn1r1   | -0.007743162 | 0.87778159  | 0.954930817 |
| ENSMUSG00000102644 | Thap6    | -0.011177144 | 0.878050468 | 0.954930817 |
| ENSMUSG00000024097 | Srsf7    | 0.014524351  | 0.878543178 | 0.954995463 |
| ENSMUSG00000025512 | Chid1    | -0.01303116  | 0.878282425 | 0.954995463 |
| ENSMUSG00000025925 | Terf1    | -0.012881512 | 0.878456608 | 0.954995463 |
| ENSMUSG00000035478 | Mbd3     | 0.012262883  | 0.878618229 | 0.954995463 |
| ENSMUSG00000038564 | Ift172   | 0.013140544  | 0.878580372 | 0.954995463 |
| ENSMUSG00000049038 | Mterf2   | 0.008691269  | 0.878648108 | 0.954995463 |
| ENSMUSG00000113523 | Gm48366  | 0.006620428  | 0.878639925 | 0.954995463 |
| ENSMUSG00000032178 | Ilf3     | -0.011563528 | 0.87895676  | 0.955247346 |
| ENSMUSG00000020697 | Lig3     | -0.013022098 | 0.879104281 | 0.955293255 |
| ENSMUSG00000028207 | Asph     | -0.013204302 | 0.879152821 | 0.955293255 |
| ENSMUSG00000010358 | Ifi35    | 0.0119469    | 0.879407595 | 0.955319375 |
| ENSMUSG00000031201 | Brcc3    | 0.012508782  | 0.879347707 | 0.955319375 |
| ENSMUSG00000114579 | Gm4130   | 0.007314132  | 0.87933009  | 0.955319375 |
| ENSMUSG00000060147 | Serpib6a | 0.013126315  | 0.87957278  | 0.95541526  |
| ENSMUSG00000035236 | Scal     | 0.006233352  | 0.879713819 | 0.955484902 |
| ENSMUSG00000005354 | Txn2     | 0.011363939  | 0.880085556 | 0.955509244 |

|                    |               |              |             |             |
|--------------------|---------------|--------------|-------------|-------------|
| ENSMUSG00000021054 | Sgpp1         | 0.012244063  | 0.880159427 | 0.955509244 |
| ENSMUSG00000029648 | Flt1          | -0.007039187 | 0.880219232 | 0.955509244 |
| ENSMUSG00000031402 | Mpp1          | -0.013027094 | 0.880111    | 0.955509244 |
| ENSMUSG00000031826 | Usp10         | 0.013297753  | 0.88020256  | 0.955509244 |
| ENSMUSG00000037643 | Prkci         | 0.011952877  | 0.880274719 | 0.955509244 |
| ENSMUSG00000090290 | Tarbp1        | 0.010462379  | 0.880092012 | 0.955509244 |
| ENSMUSG00000033220 | Rac2          | 0.011643026  | 0.880644602 | 0.955827211 |
| ENSMUSG00000021809 | Nudt13        | 0.013185606  | 0.880855374 | 0.955888922 |
| ENSMUSG00000063884 | Ptcd3         | -0.012462333 | 0.880841234 | 0.955888922 |
| ENSMUSG00000020691 | Mettl2        | -0.012412536 | 0.881176231 | 0.955889947 |
| ENSMUSG00000029238 | Clock         | 0.010520235  | 0.881171186 | 0.955889947 |
| ENSMUSG00000032551 | 1110059G10Rik | 0.013020285  | 0.880943433 | 0.955889947 |
| ENSMUSG00000049721 | Gal3st1       | -0.01138473  | 0.881027736 | 0.955889947 |
| ENSMUSG00000061331 | Gm17132       | -0.00950594  | 0.881241106 | 0.955889947 |
| ENSMUSG00000040918 | Slc19a2       | 0.011957991  | 0.881347151 | 0.955921495 |
| ENSMUSG00000035121 | Neil2         | -0.006502218 | 0.881479855 | 0.95598195  |
| ENSMUSG00000021189 | Atxn3         | 0.012690982  | 0.88185072  | 0.956086111 |
| ENSMUSG00000027312 | Atrn          | -0.011820604 | 0.881681036 | 0.956086111 |
| ENSMUSG00000035754 | Wdr18         | 0.009892571  | 0.881871086 | 0.956086111 |
| ENSMUSG00000049489 | Ccnq          | -0.012289701 | 0.881977448 | 0.956086111 |
| ENSMUSG00000097333 | Zfp87         | -0.011415249 | 0.881921249 | 0.956086111 |
| ENSMUSG00000098428 | Gm2260        | -0.001654284 | 0.882045625 | 0.956086111 |
| ENSMUSG00000110642 | Gm45710       | -0.012196784 | 0.882114711 | 0.956086111 |
| ENSMUSG00000022390 | Zc3h7b        | 0.010310756  | 0.882453847 | 0.956370233 |
| ENSMUSG00000030660 | Pik3c2a       | 0.01057506   | 0.882831999 | 0.956696585 |
| ENSMUSG00000025041 | Nt5c2         | -0.01205459  | 0.882947256 | 0.956738015 |
| ENSMUSG00000066263 | Olfr639       | 0.009371306  | 0.88312907  | 0.956851551 |
| ENSMUSG00000001829 | Clpb          | 0.012904154  | 0.883730011 | 0.956999612 |
| ENSMUSG00000021109 | Hif1a         | 0.012795595  | 0.883790995 | 0.956999612 |
| ENSMUSG00000021893 | Capn7         | 0.012687911  | 0.883412503 | 0.956999612 |
| ENSMUSG00000038844 | Kif16b        | 0.011145782  | 0.883505454 | 0.956999612 |
| ENSMUSG00000040021 | Lats1         | 0.011505394  | 0.883722558 | 0.956999612 |
| ENSMUSG00000051396 | Gm45902       | -0.008003571 | 0.883484969 | 0.956999612 |
| ENSMUSG00000068328 | Aup1          | -0.011681756 | 0.883805052 | 0.956999612 |
| ENSMUSG00000002280 | Narfl         | -0.011002051 | 0.884161453 | 0.957302075 |
| ENSMUSG00000041570 | Camsap2       | 0.008203299  | 0.884444632 | 0.957501781 |
| ENSMUSG00000113014 | Selenok-ps8   | -0.012014501 | 0.884500075 | 0.957501781 |
| ENSMUSG00000090093 | Gm14399       | 0.010605546  | 0.884659342 | 0.957575817 |
| ENSMUSG00000092032 | Vmn2r59       | -0.007227122 | 0.884722653 | 0.957575817 |
| ENSMUSG00000114251 | Tmed10-ps     | -0.012362548 | 0.884801405 | 0.957577612 |
| ENSMUSG00000015961 | Adss          | -0.011805087 | 0.885465887 | 0.957763273 |
| ENSMUSG00000027207 | Galk2         | 0.010711421  | 0.885512715 | 0.957763273 |
| ENSMUSG00000030752 | Kdm8          | -0.011873353 | 0.885274195 | 0.957763273 |

|                    |               |              |             |             |
|--------------------|---------------|--------------|-------------|-------------|
| ENSMUSG00000032737 | Inpp1         | -0.003266481 | 0.885293094 | 0.957763273 |
| ENSMUSG00000034290 | Nek9          | -0.012330537 | 0.885447607 | 0.957763273 |
| ENSMUSG00000043384 | Gprasp1       | -0.011194215 | 0.88523621  | 0.957763273 |
| ENSMUSG00000044950 | Pwwp2a        | -0.012459821 | 0.885319339 | 0.957763273 |
| ENSMUSG00000071652 | Ints5         | 0.012833537  | 0.885602407 | 0.957776883 |
| ENSMUSG00000026489 | Coq8a         | 0.010303718  | 0.885815534 | 0.95784058  |
| ENSMUSG00000039244 | E130309D02Rik | 0.011110359  | 0.885751553 | 0.95784058  |
| ENSMUSG00000114123 | Gm48416       | 0.009259502  | 0.885914368 | 0.957864064 |
| ENSMUSG00000032512 | Wdr48         | -0.011685638 | 0.886245255 | 0.957888297 |
| ENSMUSG00000053985 | Zfp14         | 0.007379228  | 0.886205592 | 0.957888297 |
| ENSMUSG00000091805 | Vmn2r108      | -0.006109969 | 0.886083763 | 0.957888297 |
| ENSMUSG00000096002 | Vmn2r53       | 0.008773511  | 0.886094713 | 0.957888297 |
| ENSMUSG00000040699 | Limd2         | -0.012487882 | 0.886416388 | 0.957961476 |
| ENSMUSG00000064330 | Pde6h         | -0.009524676 | 0.886467209 | 0.957961476 |
| ENSMUSG00000003135 | Cnot11        | 0.011196887  | 0.886994352 | 0.95803103  |
| ENSMUSG00000028975 | Pex14         | 0.012096085  | 0.886852177 | 0.95803103  |
| ENSMUSG00000040726 | Hesx1         | 0.009244063  | 0.886663219 | 0.95803103  |
| ENSMUSG00000045867 | Cradd         | -0.0114702   | 0.886866122 | 0.95803103  |
| ENSMUSG00000053746 | Ptrh1         | -0.010308266 | 0.886986329 | 0.95803103  |
| ENSMUSG00000072663 | Spef2         | 0.007973346  | 0.886925483 | 0.95803103  |
| ENSMUSG00000034473 | Sec22a        | 0.012555911  | 0.887127908 | 0.95809197  |
| ENSMUSG00000025857 | Dnaaf5        | -0.011874057 | 0.887306492 | 0.958201524 |
| ENSMUSG00000002496 | Tsc2          | 0.004669873  | 0.887581588 | 0.958415275 |
| ENSMUSG00000004455 | Ppp1cc        | 0.009644076  | 0.887985731 | 0.958604392 |
| ENSMUSG00000022253 | Nadk2         | 0.012364834  | 0.888142175 | 0.958604392 |
| ENSMUSG00000024177 | Nme4          | 0.011457963  | 0.888142608 | 0.958604392 |
| ENSMUSG00000026339 | Ccdc93        | 0.012612087  | 0.888047372 | 0.958604392 |
| ENSMUSG00000030532 | Hddc3         | -0.011889563 | 0.887910861 | 0.958604392 |
| ENSMUSG00000023235 | Ccl25         | 0.011773955  | 0.888409723 | 0.958749146 |
| ENSMUSG00000061143 | Maml3         | 0.00969947   | 0.888431098 | 0.958749146 |
| ENSMUSG00000000631 | Myo18a        | 0.008552443  | 0.888734033 | 0.958808216 |
| ENSMUSG00000011837 | Snopc2        | 0.01223252   | 0.888971811 | 0.958808216 |
| ENSMUSG00000013236 | Ptprs         | 0.009763269  | 0.889026183 | 0.958808216 |
| ENSMUSG00000019802 | Sec63         | 0.011775042  | 0.888825991 | 0.958808216 |
| ENSMUSG00000022407 | Adsl          | 0.011949551  | 0.88893348  | 0.958808216 |
| ENSMUSG00000027322 | Siglec1       | -0.010984663 | 0.888896599 | 0.958808216 |
| ENSMUSG00000115700 | Gm7517        | 0.009617489  | 0.888969386 | 0.958808216 |
| ENSMUSG00000003039 | Fam32a        | 0.010955866  | 0.889713746 | 0.959250788 |
| ENSMUSG00000015133 | Lrrk1         | -0.011366225 | 0.889699197 | 0.959250788 |
| ENSMUSG00000031959 | Wdr59         | -0.008995682 | 0.88952779  | 0.959250788 |
| ENSMUSG00000037296 | Lsm1          | 0.01102908   | 0.889745458 | 0.959250788 |
| ENSMUSG00000040354 | Mars          | -0.011910785 | 0.889862461 | 0.959293667 |
| ENSMUSG00000042419 | Nfkbil1       | -0.011941528 | 0.890048511 | 0.959410966 |

|                    |               |              |             |             |
|--------------------|---------------|--------------|-------------|-------------|
| ENSMUSG00000033732 | Sf3b3         | -0.011930377 | 0.890165547 | 0.959453858 |
| ENSMUSG00000022089 | Bin3          | -0.011749339 | 0.89039069  | 0.959499507 |
| ENSMUSG00000028399 | Ptprd         | -0.008838089 | 0.890304913 | 0.959499507 |
| ENSMUSG00000035569 | Ankrd11       | -0.011253955 | 0.890439644 | 0.959499507 |
| ENSMUSG00000020448 | Rnf185        | 0.012144075  | 0.890609391 | 0.959599172 |
| ENSMUSG00000003161 | Sri           | 0.012216148  | 0.891032143 | 0.95974963  |
| ENSMUSG00000020262 | Adarb1        | -0.005998006 | 0.89100967  | 0.95974963  |
| ENSMUSG00000031731 | Ap1g1         | 0.011104973  | 0.890853139 | 0.95974963  |
| ENSMUSG00000044145 | 1810024B03Rik | 0.011396306  | 0.891216274 | 0.95974963  |
| ENSMUSG00000070605 | Zfp992        | -0.011306073 | 0.89128991  | 0.95974963  |
| ENSMUSG00000075053 | Vdac3-ps1     | 0.001330607  | 0.891253951 | 0.95974963  |
| ENSMUSG00000113924 | Gm48493       | -0.002214504 | 0.89113104  | 0.95974963  |
| ENSMUSG00000050373 | Snx21         | -0.007316572 | 0.891466611 | 0.95985669  |
| ENSMUSG00000054304 | D130007C19Rik | 0.011317928  | 0.891854886 | 0.960025092 |
| ENSMUSG00000074874 | Ctla2b        | -0.006339977 | 0.891834408 | 0.960025092 |
| ENSMUSG00000089862 | Umad1         | 0.011103798  | 0.891710818 | 0.960025092 |
| ENSMUSG00000030145 | Zfp248        | -0.007280824 | 0.892062266 | 0.960165113 |
| ENSMUSG00000037104 | Socs5         | -0.007134222 | 0.892871141 | 0.960932261 |
| ENSMUSG00000078377 | Gm4294        | 0.008686675  | 0.892929729 | 0.960932261 |
| ENSMUSG00000038037 | Socs1         | -0.010563039 | 0.893038546 | 0.960966107 |
| ENSMUSG00000005968 | Tuft1         | 0.005913896  | 0.893412362 | 0.961118564 |
| ENSMUSG00000028464 | Tpm2          | -0.006422582 | 0.893315026 | 0.961118564 |
| ENSMUSG00000031596 | Slc7a2        | -0.007110544 | 0.893354398 | 0.961118564 |
| ENSMUSG00000113232 | Gm48494       | 0.001780484  | 0.893507065 | 0.961137201 |
| ENSMUSG00000022680 | Pdxdc1        | -0.001466452 | 0.89370512  | 0.961183765 |
| ENSMUSG00000037221 | Mospd3        | 0.010456384  | 0.893690521 | 0.961183765 |
| ENSMUSG00000032078 | Zpr1          | 0.010073658  | 0.894132304 | 0.961358973 |
| ENSMUSG00000059475 | Zfp426        | -0.010434169 | 0.894152411 | 0.961358973 |
| ENSMUSG00000067336 | Bmpr2         | -0.009100779 | 0.894177619 | 0.961358973 |
| ENSMUSG00000114547 | Gm3226        | 0.011024731  | 0.89405942  | 0.961358973 |
| ENSMUSG00000015944 | Castor2       | 0.004626288  | 0.894569215 | 0.961696748 |
| ENSMUSG00000025103 | Btbd1         | -0.011476381 | 0.894719324 | 0.961774879 |
| ENSMUSG00000103548 | Gm37670       | 0.00907443   | 0.894951119 | 0.961940796 |
| ENSMUSG00000000739 | Sult5a1       | -0.007335168 | 0.895261317 | 0.962019308 |
| ENSMUSG00000019947 | Arid5b        | -0.011363581 | 0.895290979 | 0.962019308 |
| ENSMUSG00000027007 | Itprid2       | -0.010434657 | 0.895441967 | 0.962019308 |
| ENSMUSG00000073542 | Cep76         | 0.011421555  | 0.895467948 | 0.962019308 |
| ENSMUSG00000074884 | Serf2         | -0.011000813 | 0.895488869 | 0.962019308 |
| ENSMUSG00000102443 | Gm37102       | 0.007336409  | 0.89539877  | 0.962019308 |
| ENSMUSG00000021461 | Fancc         | 0.011562557  | 0.895750276 | 0.962126584 |
| ENSMUSG00000021666 | Gfm2          | 0.016992582  | 0.895797925 | 0.962126584 |
| ENSMUSG00000042082 | Arsb          | -0.011314538 | 0.895821105 | 0.962126584 |
| ENSMUSG00000032216 | Nedd4         | -0.011349822 | 0.896195455 | 0.962351011 |

|                    |          |              |             |             |
|--------------------|----------|--------------|-------------|-------------|
| ENSMUSG00000038495 | Otud7b   | 0.009420722  | 0.896289154 | 0.962351011 |
| ENSMUSG00000043372 | Hexim2   | -0.009255127 | 0.896139439 | 0.962351011 |
| ENSMUSG00000070699 | Sars2    | 0.010863858  | 0.896339977 | 0.962351011 |
| ENSMUSG00000032864 | Rag2     | -0.00546603  | 0.896539204 | 0.962385392 |
| ENSMUSG00000039384 | Dusp10   | -0.007382321 | 0.896604441 | 0.962385392 |
| ENSMUSG00000039480 | Nt5dc1   | -0.011126765 | 0.896521448 | 0.962385392 |
| ENSMUSG00000020193 | Zpbp     | 0.010874785  | 0.896694452 | 0.962398841 |
| ENSMUSG00000001794 | Capns1   | -0.011152704 | 0.897260528 | 0.96253211  |
| ENSMUSG00000007815 | Rhoa     | 0.010856576  | 0.897081315 | 0.96253211  |
| ENSMUSG00000008393 | Carhsp1  | 0.011459775  | 0.897078684 | 0.96253211  |
| ENSMUSG00000021149 | Gtpbp4   | -0.010923743 | 0.897724468 | 0.96253211  |
| ENSMUSG00000021470 | Ercc6l2  | 0.011375818  | 0.897287818 | 0.96253211  |
| ENSMUSG00000027387 | Zc3h8    | 0.011374376  | 0.897586129 | 0.96253211  |
| ENSMUSG00000028863 | Meaf6    | 0.010661454  | 0.897099459 | 0.96253211  |
| ENSMUSG00000032386 | Trip4    | 0.011371664  | 0.89774853  | 0.96253211  |
| ENSMUSG00000043962 | Thrap3   | -0.011125233 | 0.89732411  | 0.96253211  |
| ENSMUSG00000046152 | Fut10    | -0.010200913 | 0.897653492 | 0.96253211  |
| ENSMUSG00000051586 | Mical3   | 0.007698968  | 0.897558565 | 0.96253211  |
| ENSMUSG00000066595 | Flvcr1   | 0.011405749  | 0.897649875 | 0.96253211  |
| ENSMUSG00000030847 | Bag3     | -0.009439056 | 0.89819413  | 0.962843643 |
| ENSMUSG00000053774 | Ubxn7    | -0.007211355 | 0.898170477 | 0.962843643 |
| ENSMUSG00000039670 | Oxld1    | 0.010656693  | 0.898280236 | 0.962852849 |
| ENSMUSG00000001100 | Poldip2  | 0.009845707  | 0.898771225 | 0.963000246 |
| ENSMUSG00000021871 | Gm49342  | -0.001152112 | 0.898533179 | 0.963000246 |
| ENSMUSG00000024050 | Wiz      | -0.011018935 | 0.898805399 | 0.963000246 |
| ENSMUSG00000048949 | Gm6206   | -0.0057466   | 0.898609261 | 0.963000246 |
| ENSMUSG00000083670 | Gm6829   | -0.010998143 | 0.898788486 | 0.963000246 |
| ENSMUSG00000078201 | Tmem203  | 0.011192063  | 0.898885925 | 0.963003457 |
| ENSMUSG00000048148 | Nwd1     | -0.006819855 | 0.899143948 | 0.963030696 |
| ENSMUSG00000050097 | Ces2b    | -0.005786958 | 0.899050104 | 0.963030696 |
| ENSMUSG00000056121 | Fez2     | 0.011303424  | 0.89914372  | 0.963030696 |
| ENSMUSG00000032344 | Cgas     | 0.010962537  | 0.899259723 | 0.963071652 |
| ENSMUSG00000064137 | Rhox8    | 0.006330943  | 0.899389653 | 0.963127759 |
| ENSMUSG00000048047 | Zbtb33   | 0.00800988   | 0.899484055 | 0.963145815 |
| ENSMUSG00000020821 | Kif1c    | 0.005992851  | 0.89984904  | 0.963188433 |
| ENSMUSG00000027628 | Aar2     | -0.010864056 | 0.899904891 | 0.963188433 |
| ENSMUSG00000042854 | Trp53rkb | -0.010688002 | 0.899911582 | 0.963188433 |
| ENSMUSG00000064373 | Selenop  | 0.01123792   | 0.899811111 | 0.963188433 |
| ENSMUSG00000074211 | Sdhaf1   | 0.011475173  | 0.899612834 | 0.963188433 |
| ENSMUSG00000022814 | Umps     | -0.010786616 | 0.900129989 | 0.963194847 |
| ENSMUSG00000033379 | Atp6v0b  | 0.011287556  | 0.900095065 | 0.963194847 |
| ENSMUSG00000079429 | Mroh2a   | 0.004208759  | 0.900150212 | 0.963194847 |
| ENSMUSG00000036188 | Ankmy2   | -0.010871213 | 0.90027762  | 0.963248197 |

|                    |               |              |             |             |
|--------------------|---------------|--------------|-------------|-------------|
| ENSMUSG00000094472 | Gm21897       | -0.005482056 | 0.900376903 | 0.963271448 |
| ENSMUSG00000023020 | Cox14         | 0.010828722  | 0.900465592 | 0.963283363 |
| ENSMUSG00000022554 | Hgh1          | 0.010609736  | 0.900636715 | 0.963300493 |
| ENSMUSG00000052364 | B630019K06Rik | 0.007501479  | 0.900615228 | 0.963300493 |
| ENSMUSG00000048371 | Pdp2          | 0.009924497  | 0.900729739 | 0.963317039 |
| ENSMUSG00000024811 | Tnks2         | -0.009787894 | 0.900909565 | 0.963343466 |
| ENSMUSG00000036438 | Calm2         | -0.010549555 | 0.900862873 | 0.963343466 |
| ENSMUSG00000027835 | Pdcd10        | 0.011000149  | 0.901037258 | 0.963397071 |
| ENSMUSG00000021770 | Samd8         | -0.009848796 | 0.901236501 | 0.963444236 |
| ENSMUSG00000079659 | Tmem243       | 0.010891515  | 0.901185592 | 0.963444236 |
| ENSMUSG00000029063 | Nadk          | -0.010288087 | 0.901558034 | 0.96370502  |
| ENSMUSG00000028933 | Xrcc2         | -0.010300709 | 0.90164942  | 0.96371977  |
| ENSMUSG00000052572 | Dlg2          | -0.009911246 | 0.901850435 | 0.963851683 |
| ENSMUSG00000019734 | Tmc4          | -0.006708536 | 0.901939008 | 0.963863411 |
| ENSMUSG00000037628 | Cdkn3         | 0.010911354  | 0.902157197 | 0.964013639 |
| ENSMUSG00000005447 | Pafah1b3      | -0.010314608 | 0.903077044 | 0.96405264  |
| ENSMUSG00000014837 | 4931428F04Rik | -0.008494437 | 0.902740117 | 0.96405264  |
| ENSMUSG00000020038 | Cry1          | -0.002740189 | 0.902854708 | 0.96405264  |
| ENSMUSG00000020280 | Pus10         | -0.010437372 | 0.903512994 | 0.96405264  |
| ENSMUSG00000020590 | Snx13         | -0.008632646 | 0.903307193 | 0.96405264  |
| ENSMUSG00000021385 | Ippk          | 0.010414057  | 0.90359076  | 0.96405264  |
| ENSMUSG00000021884 | Hacl1         | -0.010493006 | 0.90333031  | 0.96405264  |
| ENSMUSG00000024274 | Zscan30       | -0.004564532 | 0.903498342 | 0.96405264  |
| ENSMUSG00000025104 | Hdglf3        | 0.005856392  | 0.902531302 | 0.96405264  |
| ENSMUSG00000027180 | Fbxo3         | 0.011418611  | 0.902907312 | 0.96405264  |
| ENSMUSG00000032212 | Sltn          | 0.00922055   | 0.902701365 | 0.96405264  |
| ENSMUSG00000039318 | Rab3gap2      | -0.010449439 | 0.90346979  | 0.96405264  |
| ENSMUSG00000041215 | Yeats2        | 0.010843367  | 0.902585316 | 0.96405264  |
| ENSMUSG00000042207 | Kdm5b         | -0.010371317 | 0.903499942 | 0.96405264  |
| ENSMUSG00000047613 | A430005L14Rik | 0.011204189  | 0.90321348  | 0.96405264  |
| ENSMUSG00000050071 | Bex1          | -0.005279953 | 0.903197022 | 0.96405264  |
| ENSMUSG00000057541 | Pus7          | -0.010481572 | 0.903573797 | 0.96405264  |
| ENSMUSG00000058446 | Znrf2         | 0.010803549  | 0.902632002 | 0.96405264  |
| ENSMUSG00000022816 | Fstl1         | -0.00636619  | 0.904046168 | 0.964232612 |
| ENSMUSG00000039473 | Ubn1          | 0.010598874  | 0.903854085 | 0.964232612 |
| ENSMUSG00000056938 | Acbd4         | -0.008984554 | 0.903933924 | 0.964232612 |
| ENSMUSG00000094484 | Gm21244       | 0.008067037  | 0.904147592 | 0.964232612 |
| ENSMUSG00000117010 | CT025601.1    | -0.007913582 | 0.904126504 | 0.964232612 |
| ENSMUSG00000060475 | Wtap          | -0.008530866 | 0.904251007 | 0.96426011  |
| ENSMUSG00000022853 | Ehhadh        | -0.007715252 | 0.904376956 | 0.964293786 |
| ENSMUSG00000095105 | Edaradd       | -0.006255927 | 0.904437856 | 0.964293786 |
| ENSMUSG00000009630 | Ppp2cb        | -0.008350116 | 0.904735691 | 0.96452854  |
| ENSMUSG00000044757 | Gm6430        | -0.005053852 | 0.904955257 | 0.964679819 |

|                    |               |              |             |             |
|--------------------|---------------|--------------|-------------|-------------|
| ENSMUSG00000046591 | Ticrr         | 0.010104566  | 0.905064385 | 0.964713355 |
| ENSMUSG00000049739 | Zfp646        | -0.009024186 | 0.90519118  | 0.964765715 |
| ENSMUSG00000020441 | 2310033P09Rik | 0.010136895  | 0.905338914 | 0.964840382 |
| ENSMUSG00000113486 | Gm48676       | 0.010163926  | 0.905486507 | 0.964914885 |
| ENSMUSG00000034731 | Dgkh          | 0.008323795  | 0.90569444  | 0.96505367  |
| ENSMUSG00000051674 | Dcun1d4       | 0.008082925  | 0.905806737 | 0.965090537 |
| ENSMUSG00000033323 | Ctdp1         | -0.00938155  | 0.906507132 | 0.965697376 |
| ENSMUSG00000043987 | Cep164        | 0.009777798  | 0.906531793 | 0.965697376 |
| ENSMUSG00000057133 | Chd6          | -0.009698807 | 0.90662045  | 0.965708997 |
| ENSMUSG00000033192 | Lpcat2        | 0.009943223  | 0.906709158 | 0.96572067  |
| ENSMUSG00000026928 | Card9         | 0.010120729  | 0.907119994 | 0.965992579 |
| ENSMUSG00000038214 | Bend3         | -0.006166529 | 0.907042653 | 0.965992579 |
| ENSMUSG00000003847 | Nfat5         | 0.007702361  | 0.907495518 | 0.966061178 |
| ENSMUSG00000017299 | Dnttip1       | 0.010352236  | 0.907424029 | 0.966061178 |
| ENSMUSG00000027001 | Dusp19        | -0.010141604 | 0.907493509 | 0.966061178 |
| ENSMUSG00000045671 | Spred2        | 0.008277732  | 0.907289887 | 0.966061178 |
| ENSMUSG00000024668 | Sdhaf2        | 0.009703873  | 0.90771868  | 0.966215934 |
| ENSMUSG00000106190 | Gm20768       | 0.010229674  | 0.90780615  | 0.966226237 |
| ENSMUSG00000026579 | F5            | -0.00793743  | 0.908044443 | 0.966263675 |
| ENSMUSG00000078875 | Gm14419       | 0.009055289  | 0.908074703 | 0.966263675 |
| ENSMUSG00000094627 | Gm10182       | 0.005060249  | 0.907987015 | 0.966263675 |
| ENSMUSG00000009418 | Nav1          | -0.007858048 | 0.908722777 | 0.966456513 |
| ENSMUSG00000029209 | Gnpda2        | 0.010159851  | 0.908360113 | 0.966456513 |
| ENSMUSG00000040560 | Wdr7          | -0.008070787 | 0.908464066 | 0.966456513 |
| ENSMUSG00000047286 | Olfr370       | 0.008943805  | 0.908618201 | 0.966456513 |
| ENSMUSG00000047342 | Zfp286        | 0.008171967  | 0.908559174 | 0.966456513 |
| ENSMUSG00000058239 | Usf2          | 0.008665209  | 0.90865208  | 0.966456513 |
| ENSMUSG00000040204 | Pclaf         | -0.010839989 | 0.908854101 | 0.966513423 |
| ENSMUSG00000005575 | Ube2m         | 0.011506959  | 0.909205051 | 0.966609252 |
| ENSMUSG00000024487 | Yipf5         | 0.009158986  | 0.909114085 | 0.966609252 |
| ENSMUSG00000026715 | Serpinc1      | -0.005402321 | 0.909075903 | 0.966609252 |
| ENSMUSG00000048481 | Mypop         | -0.007042977 | 0.909255495 | 0.966609252 |
| ENSMUSG00000034023 | Fancd2        | -0.009641398 | 0.909394878 | 0.966674693 |
| ENSMUSG00000021886 | Gpr65         | -0.009998775 | 0.909594344 | 0.966759009 |
| ENSMUSG00000075486 | Commd6        | -0.009756183 | 0.909629864 | 0.966759009 |
| ENSMUSG00000010609 | Psen2         | -0.009231324 | 0.909798121 | 0.966772389 |
| ENSMUSG00000026383 | Epb41l5       | 0.005090851  | 0.909734771 | 0.966772389 |
| ENSMUSG00000027882 | Stxbp3        | 0.010120746  | 0.909887376 | 0.966784524 |
| ENSMUSG00000071724 | Smpd5         | 0.005188699  | 0.910061707 | 0.966887047 |
| ENSMUSG00000002031 | Ift46         | 0.010164205  | 0.910757427 | 0.967295254 |
| ENSMUSG00000017550 | Atad5         | 0.009873258  | 0.910638112 | 0.967295254 |
| ENSMUSG00000046441 | Cmtr2         | -0.009692243 | 0.910682039 | 0.967295254 |
| ENSMUSG00000098650 | Gm28048       | 0.009583848  | 0.910747631 | 0.967295254 |

|                    |            |              |             |             |
|--------------------|------------|--------------|-------------|-------------|
| ENSMUSG00000021266 | Wars       | 0.009888714  | 0.910899029 | 0.967362931 |
| ENSMUSG00000072621 | Slfn10-ps  | 0.007334945  | 0.911033587 | 0.967423116 |
| ENSMUSG00000090136 | Gm10177    | 0.009450088  | 0.911134729 | 0.967447809 |
| ENSMUSG00000020993 | Trappc6b   | -0.008738072 | 0.911427658 | 0.967613371 |
| ENSMUSG00000025939 | Ube2w      | -0.009159761 | 0.911446457 | 0.967613371 |
| ENSMUSG00000032615 | Nt5m       | 0.00960333   | 0.91163798  | 0.967733985 |
| ENSMUSG00000115423 | AL731706.1 | -0.009506049 | 0.911830332 | 0.967855457 |
| ENSMUSG00000085172 | Gm6542     | 0.004712706  | 0.911990146 | 0.967942374 |
| ENSMUSG00000021245 | Mlh3       | -0.008328946 | 0.912363178 | 0.968029438 |
| ENSMUSG00000092416 | Zfp141     | -0.009389259 | 0.912383917 | 0.968029438 |
| ENSMUSG00000115684 | Gm6087     | -0.00077066  | 0.91216434  | 0.968029438 |
| ENSMUSG00000116268 | LT629154.3 | -0.005498257 | 0.912331115 | 0.968029438 |
| ENSMUSG00000115232 | Gm49378    | -0.001174027 | 0.912806367 | 0.968394934 |
| ENSMUSG00000040734 | Ppp1r13l   | 0.003980602  | 0.912955046 | 0.968469948 |
| ENSMUSG00000002103 | Acp2       | -0.009404549 | 0.913198726 | 0.968563007 |
| ENSMUSG00000025932 | Eya1       | 0.005032617  | 0.913153216 | 0.968563007 |
| ENSMUSG00000017144 | Rnd3       | -0.007543158 | 0.913688545 | 0.968586278 |
| ENSMUSG00000020806 | Rhbdf2     | -0.008487125 | 0.913681347 | 0.968586278 |
| ENSMUSG00000037343 | Taf2       | 0.008939337  | 0.913671746 | 0.968586278 |
| ENSMUSG00000049670 | Morn4      | -0.004953221 | 0.913678339 | 0.968586278 |
| ENSMUSG00000081321 | Gm15304    | 0.005538279  | 0.913403888 | 0.968586278 |
| ENSMUSG00000090751 | Vmn2r63    | -0.005707213 | 0.913423641 | 0.968586278 |
| ENSMUSG00000012609 | Ttll5      | 0.007537864  | 0.914181779 | 0.968613143 |
| ENSMUSG00000016496 | Cd274      | -0.00622639  | 0.913938747 | 0.968613143 |
| ENSMUSG00000030304 | Ergic2     | 0.009533468  | 0.914181203 | 0.968613143 |
| ENSMUSG00000036661 | Dennd3     | -0.003845655 | 0.913926198 | 0.968613143 |
| ENSMUSG00000069011 | Gm10254    | -0.001229589 | 0.913989263 | 0.968613143 |
| ENSMUSG00000112038 | Gm47056    | 0.006230762  | 0.914072742 | 0.968613143 |
| ENSMUSG00000051184 | Zfp524     | -0.008986558 | 0.914631155 | 0.969006617 |
| ENSMUSG00000030254 | Rad18      | 0.008999238  | 0.914905607 | 0.969069249 |
| ENSMUSG00000030309 | Caprin2    | 0.006155015  | 0.915158384 | 0.969069249 |
| ENSMUSG00000055024 | Ep300      | -0.007257694 | 0.91503691  | 0.969069249 |
| ENSMUSG00000059923 | Grb2       | -0.00730717  | 0.915060598 | 0.969069249 |
| ENSMUSG00000062691 | Cebpzoz    | 0.008742079  | 0.914863176 | 0.969069249 |
| ENSMUSG00000066456 | Hmgn3      | -0.009279585 | 0.915118109 | 0.969069249 |
| ENSMUSG00000029561 | Oasl2      | 0.006028749  | 0.915377157 | 0.969218282 |
| ENSMUSG00000010663 | Fads1      | -0.007031857 | 0.915495916 | 0.969236787 |
| ENSMUSG00000115267 | Vmn1r76    | -0.004767381 | 0.915550698 | 0.969236787 |
| ENSMUSG00000018442 | Derl2      | 0.008592016  | 0.915852492 | 0.969308435 |
| ENSMUSG00000032481 | Smarcc1    | 0.008427407  | 0.915753537 | 0.969308435 |
| ENSMUSG00000037253 | Mex3c      | -0.008770005 | 0.915832123 | 0.969308435 |
| ENSMUSG00000001441 | Npepps     | -0.007791706 | 0.916495283 | 0.969367395 |
| ENSMUSG00000004880 | Lbr        | -0.008733745 | 0.916421821 | 0.969367395 |

|                    |         |              |             |             |
|--------------------|---------|--------------|-------------|-------------|
| ENSMUSG00000016946 | Kctd5   | 0.008558216  | 0.916335813 | 0.969367395 |
| ENSMUSG00000018965 | Ywhah   | 0.005706768  | 0.916009896 | 0.969367395 |
| ENSMUSG00000024454 | Hdac3   | 0.009301072  | 0.916492956 | 0.969367395 |
| ENSMUSG00000037570 | Mcrs1   | -0.009329436 | 0.916291656 | 0.969367395 |
| ENSMUSG00000041975 | Mettl8  | 0.008277746  | 0.916389471 | 0.969367395 |
| ENSMUSG00000064360 | mt-Nd3  | -0.001568545 | 0.91653254  | 0.969367395 |
| ENSMUSG00000060591 | Ifitm2  | 0.00939215   | 0.916673559 | 0.969433995 |
| ENSMUSG00000000568 | Hnrnpd  | -0.008925324 | 0.916804595 | 0.969490029 |
| ENSMUSG00000029605 | Oas1b   | 0.006927222  | 0.916896676 | 0.969504862 |
| ENSMUSG00000078897 | Gm4724  | -0.007780552 | 0.917457922 | 0.970015735 |
| ENSMUSG00000056531 | Ccdc18  | -0.008722359 | 0.91759073  | 0.970073577 |
| ENSMUSG00000090946 | Ccdc71l | 0.008682268  | 0.91778536  | 0.970196762 |
| ENSMUSG00000014550 | Rbsn    | 0.00911955   | 0.918181737 | 0.970533176 |
| ENSMUSG00000039046 | Usp6nl  | -0.008590222 | 0.918461807 | 0.970746605 |
| ENSMUSG00000027806 | Tsc22d2 | -0.006007119 | 0.91857739  | 0.970786162 |
| ENSMUSG00000092428 | Gm20545 | 0.009110019  | 0.918661725 | 0.970792691 |
| ENSMUSG00000028688 | Toe1    | -0.007795173 | 0.918824636 | 0.970806694 |
| ENSMUSG00000040250 | Ints13  | -0.008769906 | 0.918831293 | 0.970806694 |
| ENSMUSG00000041064 | Pif1    | -0.007835301 | 0.919095045 | 0.970869063 |
| ENSMUSG00000050471 | Fam118b | -0.008475643 | 0.919124814 | 0.970869063 |
| ENSMUSG00000066810 | Gm10181 | 0.004837618  | 0.919068118 | 0.970869063 |
| ENSMUSG00000021693 | Kif2a   | 0.0072173    | 0.91936631  | 0.970890089 |
| ENSMUSG00000022773 | Ypel1   | -0.005315429 | 0.919336214 | 0.970890089 |
| ENSMUSG00000042790 | Rnf214  | -0.008705213 | 0.919379215 | 0.970890089 |
| ENSMUSG00000030339 | Ltbr    | -0.007161508 | 0.919643509 | 0.971004082 |
| ENSMUSG00000045098 | Kmt5b   | -0.008745747 | 0.919571313 | 0.971004082 |
| ENSMUSG00000021226 | Acot2   | -0.00498397  | 0.919799886 | 0.971086645 |
| ENSMUSG00000056258 | Kcnq3   | 0.002971281  | 0.919890108 | 0.971099357 |
| ENSMUSG00000015804 | Med28   | 0.008703603  | 0.920840544 | 0.971359694 |
| ENSMUSG00000019917 | Sept10  | -0.00753483  | 0.92047568  | 0.971359694 |
| ENSMUSG00000020823 | Sec14l1 | 0.00812038   | 0.920657688 | 0.971359694 |
| ENSMUSG00000022800 | Fyttd1  | 0.007586971  | 0.920485689 | 0.971359694 |
| ENSMUSG00000026154 | Sdhaf4  | 0.008347219  | 0.920764455 | 0.971359694 |
| ENSMUSG00000028233 | Tgs1    | 0.008654149  | 0.920570983 | 0.971359694 |
| ENSMUSG00000028651 | Ppie    | -0.008560223 | 0.920832857 | 0.971359694 |
| ENSMUSG00000031931 | Ankrd49 | -0.008022091 | 0.920446798 | 0.971359694 |
| ENSMUSG00000032932 | Hspa13  | 0.009055313  | 0.920612542 | 0.971359694 |
| ENSMUSG00000000738 | Spg7    | -0.007582985 | 0.920976531 | 0.971420643 |
| ENSMUSG00000020349 | Ppp2ca  | 0.006732685  | 0.921344156 | 0.971679041 |
| ENSMUSG00000028709 | Mob3c   | -0.006195711 | 0.921418303 | 0.971679041 |
| ENSMUSG00000046861 | Hectd3  | 0.008072796  | 0.921456197 | 0.971679041 |
| ENSMUSG00000022110 | Sucla2  | 0.008886153  | 0.921556248 | 0.971702051 |
| ENSMUSG00000020739 | Nup85   | 0.008164419  | 0.92165713  | 0.971725933 |

|                    |               |              |             |             |
|--------------------|---------------|--------------|-------------|-------------|
| ENSMUSG0000004473  | Clec11a       | 0.008385156  | 0.92233253  | 0.971779116 |
| ENSMUSG00000020150 | Gamt          | 0.007686935  | 0.922032238 | 0.971779116 |
| ENSMUSG00000026135 | Zfp142        | 0.005864792  | 0.92218266  | 0.971779116 |
| ENSMUSG00000032525 | Nktr          | -0.008432168 | 0.921899133 | 0.971779116 |
| ENSMUSG00000034189 | Hsdl1         | -0.008231031 | 0.9219203   | 0.971779116 |
| ENSMUSG00000035585 | Tsen34        | -0.00731286  | 0.922317954 | 0.971779116 |
| ENSMUSG00000042992 | Borcs5        | -0.008374588 | 0.922333468 | 0.971779116 |
| ENSMUSG00000114827 | Gm46432       | -0.005154779 | 0.922223522 | 0.971779116 |
| ENSMUSG00000024843 | Chka          | -0.007191784 | 0.922466651 | 0.971798626 |
| ENSMUSG00000035378 | Shq1          | 0.008076689  | 0.922508461 | 0.971798626 |
| ENSMUSG00000022074 | Tnfrsf10b     | 0.006055324  | 0.922648037 | 0.971863235 |
| ENSMUSG00000009108 | Gnat2         | -0.006204374 | 0.922905962 | 0.97188766  |
| ENSMUSG00000021983 | Atp8a2        | -0.003594693 | 0.922762355 | 0.97188766  |
| ENSMUSG00000090077 | Lime1         | -0.005430689 | 0.922898611 | 0.97188766  |
| ENSMUSG00000022350 | Washc5        | -0.008013318 | 0.923006709 | 0.971911354 |
| ENSMUSG00000007564 | Ppp2r1a       | -0.00764443  | 0.923582739 | 0.972216184 |
| ENSMUSG00000018574 | Acadvl        | -0.010061367 | 0.923842713 | 0.972216184 |
| ENSMUSG00000019863 | Qrs1          | -0.008260568 | 0.924017258 | 0.972216184 |
| ENSMUSG00000021712 | Trim23        | -0.00770022  | 0.92407892  | 0.972216184 |
| ENSMUSG00000034252 | Senp6         | 0.008592607  | 0.923471729 | 0.972216184 |
| ENSMUSG00000035293 | G2e3          | 0.00829448   | 0.923757312 | 0.972216184 |
| ENSMUSG00000035365 | Parpbp        | -0.008008212 | 0.923489138 | 0.972216184 |
| ENSMUSG00000040010 | Slc7a5        | -0.002864997 | 0.923819919 | 0.972216184 |
| ENSMUSG00000060708 | Bloc1s4       | 0.008532937  | 0.924057558 | 0.972216184 |
| ENSMUSG00000068855 | Hist2h2ac     | 0.007944926  | 0.923874508 | 0.972216184 |
| ENSMUSG00000024592 | C330018D20Rik | 0.008372065  | 0.924200576 | 0.972261824 |
| ENSMUSG00000003031 | Cdkn1b        | -0.006634235 | 0.924354122 | 0.972341002 |
| ENSMUSG00000040396 | Abhd13        | 0.008376568  | 0.924475703 | 0.972386545 |
| ENSMUSG00000025350 | Rdh5          | 0.005282393  | 0.924686583 | 0.972505123 |
| ENSMUSG00000113004 | Gm47951       | 0.004732669  | 0.924745029 | 0.972505123 |
| ENSMUSG00000020268 | Lym7          | -0.006773083 | 0.925457145 | 0.972913359 |
| ENSMUSG00000024082 | Ndufaf7       | 0.008067323  | 0.925380946 | 0.972913359 |
| ENSMUSG00000028149 | Rap1gds1      | 0.007561316  | 0.92536379  | 0.972913359 |
| ENSMUSG00000029111 | Nelfa         | -0.006930909 | 0.925524857 | 0.972913359 |
| ENSMUSG00000074579 | Lekr1         | 0.007947755  | 0.925340608 | 0.972913359 |
| ENSMUSG00000035958 | Tdp2          | -0.007525268 | 0.925778565 | 0.973015362 |
| ENSMUSG00000083465 | Gm11652       | 0.004254951  | 0.925757251 | 0.973015362 |
| ENSMUSG00000020914 | Top2a         | 0.007768227  | 0.925945741 | 0.973108727 |
| ENSMUSG00000078867 | Gm14418       | 0.00715854   | 0.926370686 | 0.973472951 |
| ENSMUSG00000031536 | Polb          | 0.00822436   | 0.926506865 | 0.973533692 |
| ENSMUSG00000007812 | Zfp655        | -0.007925278 | 0.926622355 | 0.973572684 |
| ENSMUSG00000059288 | Cdyl          | 0.007578811  | 0.926800265 | 0.973677247 |
| ENSMUSG00000042106 | Inka1         | -0.007715199 | 0.927174558 | 0.973988091 |

|                    |                |              |             |             |
|--------------------|----------------|--------------|-------------|-------------|
| ENSMUSG00000020659 | Cbll1          | -0.007950685 | 0.927537156 | 0.974071305 |
| ENSMUSG00000027602 | Map1lc3a       | 0.00724214   | 0.927567458 | 0.974071305 |
| ENSMUSG00000050592 | Fam78a         | -0.006784199 | 0.927441344 | 0.974071305 |
| ENSMUSG00000074030 | Exoc8          | 0.007990067  | 0.927528069 | 0.974071305 |
| ENSMUSG00000032028 | Nxpe2          | 0.004123008  | 0.928056052 | 0.974502005 |
| ENSMUSG00000030697 | Ppp4c          | -0.007388271 | 0.928313121 | 0.974524787 |
| ENSMUSG00000031667 | Aktip          | -0.003463037 | 0.928282941 | 0.974524787 |
| ENSMUSG00000042165 | Gm9774         | -0.007586729 | 0.928189049 | 0.974524787 |
| ENSMUSG00000030276 | Ttll3          | -0.003567296 | 0.928823988 | 0.974978683 |
| ENSMUSG00000040213 | Kyat3          | -0.007241696 | 0.928928933 | 0.975006445 |
| ENSMUSG00000053297 | Al854703       | 0.004928081  | 0.929027168 | 0.975027161 |
| ENSMUSG00000041124 | Msantd4        | -0.007620142 | 0.929156749 | 0.975080768 |
| ENSMUSG00000001436 | Slc19a1        | -0.007597557 | 0.929463853 | 0.975150493 |
| ENSMUSG00000028680 | Plk3           | -0.005558985 | 0.92961573  | 0.975150493 |
| ENSMUSG00000034936 | Arl4d          | 0.004247778  | 0.929564142 | 0.975150493 |
| ENSMUSG00000060935 | Tmem263        | 0.008080476  | 0.929612949 | 0.975150493 |
| ENSMUSG00000094103 | 1700047I17Rik2 | 0.0066245    | 0.92943067  | 0.975150493 |
| ENSMUSG00000046245 | Pilra          | 0.007748219  | 0.929905329 | 0.975371905 |
| ENSMUSG00000079184 | Mphosph8       | -0.007164437 | 0.930131196 | 0.975526436 |
| ENSMUSG00000034175 | Rhbdd3         | 0.007721691  | 0.930229786 | 0.975547465 |
| ENSMUSG00000020744 | Slc25a19       | 0.007809658  | 0.930529139 | 0.975677007 |
| ENSMUSG00000046881 | Olf374         | -0.004741259 | 0.930503655 | 0.975677007 |
| ENSMUSG00000115932 | LT629148.2     | -0.006897164 | 0.930588962 | 0.975677007 |
| ENSMUSG00000020020 | Usp44          | 0.006427446  | 0.930765346 | 0.975779572 |
| ENSMUSG00000000884 | Gnb1l          | -0.007321928 | 0.931541268 | 0.976399379 |
| ENSMUSG00000030486 | Zfp108         | -0.004607605 | 0.931592387 | 0.976399379 |
| ENSMUSG00000035372 | 1810055G02Rik  | -0.007243846 | 0.931564094 | 0.976399379 |
| ENSMUSG00000018449 | Rpain          | -0.006952471 | 0.931689868 | 0.976419157 |
| ENSMUSG00000020087 | Tysnd1         | -0.013847879 | 0.93192206  | 0.976424386 |
| ENSMUSG00000042476 | Abcb4          | -0.004065469 | 0.931922776 | 0.976424386 |
| ENSMUSG00000115920 | Gm18283        | 0.00668477   | 0.93193069  | 0.976424386 |
| ENSMUSG00000028291 | Akirin2        | 0.006816725  | 0.932190522 | 0.976496735 |
| ENSMUSG00000054150 | Syne3          | -0.007079141 | 0.932235592 | 0.976496735 |
| ENSMUSG00000105189 | Gm7774         | 0.003384619  | 0.93214557  | 0.976496735 |
| ENSMUSG00000029478 | Ncor2          | -6.71E-05    | 0.932395951 | 0.976500009 |
| ENSMUSG00000037788 | Vopp1          | 0.007386242  | 0.932381767 | 0.976500009 |
| ENSMUSG00000033392 | Clasp2         | -0.006417784 | 0.932567086 | 0.976595221 |
| ENSMUSG00000043885 | Slc36a4        | -0.00661696  | 0.932644112 | 0.976595221 |
| ENSMUSG00000024068 | Spast          | 0.00741485   | 0.93315277  | 0.976605117 |
| ENSMUSG00000038671 | Arfrp1         | 0.006771987  | 0.932974503 | 0.976605117 |
| ENSMUSG00000051238 | Swsap1         | 0.007398443  | 0.93320394  | 0.976605117 |
| ENSMUSG00000054474 | Thns12         | -0.004190234 | 0.933098155 | 0.976605117 |
| ENSMUSG00000107002 | 0610012G03Rik  | -0.006729279 | 0.932923514 | 0.976605117 |

|                    |          |              |             |             |
|--------------------|----------|--------------|-------------|-------------|
| ENSMUSG00000108183 | Gm44227  | -0.006018468 | 0.932806626 | 0.976605117 |
| ENSMUSG00000113921 | Gm48054  | 0.004984318  | 0.932898966 | 0.976605117 |
| ENSMUSG00000005667 | Mthfd2   | -0.007050118 | 0.933984233 | 0.976633343 |
| ENSMUSG00000020527 | Myo19    | -0.004892137 | 0.933620853 | 0.976633343 |
| ENSMUSG00000025538 | Sumf2    | 0.006718354  | 0.934126506 | 0.976633343 |
| ENSMUSG00000026926 | Pmpca    | 0.007522533  | 0.934011197 | 0.976633343 |
| ENSMUSG00000027331 | Knstrn   | 0.006621336  | 0.933582034 | 0.976633343 |
| ENSMUSG00000029310 | Nudt9    | 0.006663232  | 0.934170722 | 0.976633343 |
| ENSMUSG00000029402 | Snrnp35  | 0.007030376  | 0.934178838 | 0.976633343 |
| ENSMUSG00000033808 | Tmem87a  | 0.005937449  | 0.933993507 | 0.976633343 |
| ENSMUSG00000034109 | Golim4   | 0.007401045  | 0.933816729 | 0.976633343 |
| ENSMUSG00000039063 | Echdc3   | 0.005686473  | 0.933618121 | 0.976633343 |
| ENSMUSG00000064023 | Klk8     | 0.006363925  | 0.933806601 | 0.976633343 |
| ENSMUSG00000074604 | Mgst2    | 0.007925887  | 0.933707706 | 0.976633343 |
| ENSMUSG00000112557 | Gm47626  | 0.003292473  | 0.93425307  | 0.976633343 |
| ENSMUSG00000021514 | Zfp369   | -0.005949888 | 0.934650071 | 0.976642063 |
| ENSMUSG00000023971 | Rrp36    | -0.006477162 | 0.934503325 | 0.976642063 |
| ENSMUSG00000025076 | Casp7    | 0.006690069  | 0.934414277 | 0.976642063 |
| ENSMUSG00000078942 | Naip6    | -0.004978006 | 0.934642541 | 0.976642063 |
| ENSMUSG00000115223 | Gm48985  | 0.005830475  | 0.934654553 | 0.976642063 |
| ENSMUSG00000027997 | Casp6    | 0.007383164  | 0.934815327 | 0.976645738 |
| ENSMUSG00000037336 | Mfsd2b   | 0.005063194  | 0.934749619 | 0.976645738 |
| ENSMUSG00000006390 | Elovl1   | 0.006728649  | 0.935462464 | 0.977159621 |
| ENSMUSG00000048429 | Timm29   | -0.006560934 | 0.93554321  | 0.977159621 |
| ENSMUSG00000049232 | Tigd2    | -0.0069344   | 0.93553311  | 0.977159621 |
| ENSMUSG00000040592 | Cd79b    | 0.007041806  | 0.935769933 | 0.977314247 |
| ENSMUSG00000049103 | Ccr2     | -0.006994001 | 0.936015483 | 0.97745496  |
| ENSMUSG00000053182 | Gm609    | -0.005155045 | 0.936219439 | 0.97745496  |
| ENSMUSG00000073060 | Zxda     | -0.001477164 | 0.936129303 | 0.97745496  |
| ENSMUSG00000081888 | Spcs2-ps | 0.003972447  | 0.936203549 | 0.97745496  |
| ENSMUSG00000022962 | Gart     | -0.006177783 | 0.936411051 | 0.977490685 |
| ENSMUSG00000033799 | Fam208b  | 0.003889109  | 0.93637281  | 0.977490685 |
| ENSMUSG00000024160 | Spsb3    | -0.006645494 | 0.93695173  | 0.977591428 |
| ENSMUSG00000026779 | Mastl    | -0.005938942 | 0.936979788 | 0.977591428 |
| ENSMUSG00000028188 | Spata1   | 0.005578865  | 0.93681018  | 0.977591428 |
| ENSMUSG00000028613 | Lrp8     | 0.006940414  | 0.93674113  | 0.977591428 |
| ENSMUSG00000030465 | Psd3     | -0.005007153 | 0.936847972 | 0.977591428 |
| ENSMUSG00000118125 | Sssca1   | -0.006143989 | 0.936699732 | 0.977591428 |
| ENSMUSG00000028974 | Dffa     | 0.00687191   | 0.937150533 | 0.97768745  |
| ENSMUSG00000113393 | Gm48415  | -0.001309679 | 0.937359508 | 0.977823334 |
| ENSMUSG00000001632 | Brpf1    | -0.006363402 | 0.937524783 | 0.9778315   |
| ENSMUSG00000096822 | Olfir344 | -0.003087805 | 0.937474119 | 0.9778315   |
| ENSMUSG00000042851 | Zc3h6    | -0.004557683 | 0.93784947  | 0.978088016 |

|                    |               |              |             |             |
|--------------------|---------------|--------------|-------------|-------------|
| ENSMUSG00000080115 | Eef1akmt3     | -0.004686158 | 0.938029409 | 0.978193543 |
| ENSMUSG00000029815 | Malsu1        | 0.006529039  | 0.938190881 | 0.978197677 |
| ENSMUSG00000118346 | Tmem179b      | 0.005756944  | 0.938176349 | 0.978197677 |
| ENSMUSG00000046841 | Ckap4         | 0.006893915  | 0.938304316 | 0.978233835 |
| ENSMUSG00000030682 | Cdipt         | -0.007102492 | 0.939073482 | 0.97886145  |
| ENSMUSG00000032294 | Pkm           | 0.006950809  | 0.939135833 | 0.97886145  |
| ENSMUSG00000073888 | Ccl27a        | -0.004240936 | 0.939142734 | 0.97886145  |
| ENSMUSG00000031595 | Pdgfrl        | 0.003751637  | 0.939359651 | 0.97898999  |
| ENSMUSG00000114456 | Hist1h2bh     | 0.004113682  | 0.939423693 | 0.97898999  |
| ENSMUSG00000025314 | Ptprj         | -0.005363959 | 0.93963978  | 0.979050894 |
| ENSMUSG00000029518 | Rab35         | -0.005241948 | 0.939639312 | 0.979050894 |
| ENSMUSG00000025025 | Mxi1          | 0.006944348  | 0.939856181 | 0.979071453 |
| ENSMUSG00000027963 | Extl2         | -0.001777437 | 0.939847133 | 0.979071453 |
| ENSMUSG00000072720 | Myo18b        | 0.003842249  | 0.939895983 | 0.979071453 |
| ENSMUSG00000001158 | Snrnp27       | 0.005919704  | 0.940327553 | 0.979142461 |
| ENSMUSG00000030835 | Nomol         | 0.006697687  | 0.940090458 | 0.979142461 |
| ENSMUSG00000031174 | Rpgr          | 0.006658424  | 0.940437127 | 0.979142461 |
| ENSMUSG00000033871 | Ppargc1b      | -0.006055275 | 0.940410495 | 0.979142461 |
| ENSMUSG00000066306 | Numa1         | -0.006413612 | 0.940257488 | 0.979142461 |
| ENSMUSG00000092118 | Fancf         | 0.006624903  | 0.940261949 | 0.979142461 |
| ENSMUSG00000035704 | Alg8          | -0.005889823 | 0.940523445 | 0.979150257 |
| ENSMUSG00000009563 | Tor2a         | 0.007642353  | 0.940787912 | 0.979276629 |
| ENSMUSG00000015776 | Med22         | -0.006375642 | 0.940802513 | 0.979276629 |
| ENSMUSG00000018143 | Mafk          | -0.006285389 | 0.941070594 | 0.979309471 |
| ENSMUSG00000025612 | Bach1         | 0.005388092  | 0.940916411 | 0.979309471 |
| ENSMUSG00000031529 | Tnks          | -0.002348551 | 0.94103881  | 0.979309471 |
| ENSMUSG00000021959 | Lats2         | 0.005244426  | 0.941204909 | 0.979367193 |
| ENSMUSG00000024772 | Ehd1          | 0.006551218  | 0.941636175 | 0.97956976  |
| ENSMUSG00000048232 | Fbxo10        | -0.002182189 | 0.941552541 | 0.97956976  |
| ENSMUSG00000079737 | 3110001l22Rik | 0.006437979  | 0.941610916 | 0.97956976  |
| ENSMUSG00000003549 | Erccl         | -0.013902004 | 0.942010757 | 0.979877365 |
| ENSMUSG00000034636 | Zyg11b        | -0.003029289 | 0.94233736  | 0.979915383 |
| ENSMUSG00000055633 | Zfp580        | 0.003841444  | 0.942218455 | 0.979915383 |
| ENSMUSG00000071657 | Bscl2         | -0.005232449 | 0.942362873 | 0.979915383 |
| ENSMUSG00000072693 | Gm10401       | 0.004452548  | 0.942163967 | 0.979915383 |
| ENSMUSG00000027709 | Mccc1         | -0.005760305 | 0.942627797 | 0.980066808 |
| ENSMUSG00000058761 | Rnf169        | 0.005380608  | 0.942666304 | 0.980066808 |
| ENSMUSG00000028573 | Fggy          | 0.005780983  | 0.942753894 | 0.980075839 |
| ENSMUSG00000008429 | Herpud2       | 0.006400547  | 0.943261256 | 0.980496511 |
| ENSMUSG00000024424 | Ttc39c        | 0.00645223   | 0.943332364 | 0.980496511 |
| ENSMUSG00000029090 | Adgra3        | -0.002240156 | 0.943395363 | 0.980496511 |
| ENSMUSG00000003809 | Gcdh          | 0.006354807  | 0.943566269 | 0.980592088 |
| ENSMUSG00000024767 | Otub1         | 0.006679659  | 0.943780618 | 0.980730506 |

|                    |            |              |             |             |
|--------------------|------------|--------------|-------------|-------------|
| ENSMUSG00000034163 | Zfc3h1     | -0.005953979 | 0.943857376 | 0.980730506 |
| ENSMUSG00000029346 | Srrd       | -0.007153237 | 0.944226841 | 0.980739628 |
| ENSMUSG00000030149 | Klrk1      | -0.004610473 | 0.944391993 | 0.980739628 |
| ENSMUSG00000040165 | Cd209c     | -0.002648128 | 0.944418863 | 0.980739628 |
| ENSMUSG00000042599 | Kdm7a      | 0.004778549  | 0.944372981 | 0.980739628 |
| ENSMUSG00000063739 | Gm4963     | -0.002450992 | 0.943953845 | 0.980739628 |
| ENSMUSG00000068014 | Gm14648    | 0.001020417  | 0.944315348 | 0.980739628 |
| ENSMUSG00000078622 | Ccdc47     | -0.004919278 | 0.944360837 | 0.980739628 |
| ENSMUSG00000018921 | Pelp1      | -0.005654323 | 0.944524188 | 0.980767007 |
| ENSMUSG00000059447 | Hadhb      | -0.005170581 | 0.944918369 | 0.981094296 |
| ENSMUSG00000020790 | Ankfy1     | 0.006140256  | 0.94553853  | 0.981246059 |
| ENSMUSG00000022861 | Dgkg       | 0.006273039  | 0.945182729 | 0.981246059 |
| ENSMUSG00000032011 | Thy1       | -0.003733093 | 0.945526055 | 0.981246059 |
| ENSMUSG00000032097 | Ddx6       | 0.006304295  | 0.945328752 | 0.981246059 |
| ENSMUSG00000051853 | Arf3       | -0.006267184 | 0.945410856 | 0.981246059 |
| ENSMUSG00000116995 | Gm21926    | -0.00538031  | 0.945390542 | 0.981246059 |
| ENSMUSG00000029776 | Hibadh     | 0.00406874   | 0.945881866 | 0.981438364 |
| ENSMUSG00000052889 | Prkcb      | 0.005937537  | 0.945835698 | 0.981438364 |
| ENSMUSG00000003528 | Slc25a1    | 0.004944244  | 0.946606482 | 0.981750044 |
| ENSMUSG00000021431 | Snrnp48    | 0.005919291  | 0.946526146 | 0.981750044 |
| ENSMUSG00000023830 | Igf2r      | 0.001078011  | 0.946476356 | 0.981750044 |
| ENSMUSG00000028857 | Tmem222    | 0.005569953  | 0.946682284 | 0.981750044 |
| ENSMUSG00000035173 | Ccdc186    | -0.004925114 | 0.946704656 | 0.981750044 |
| ENSMUSG00000069309 | Hist1h2an  | -0.005513908 | 0.946604078 | 0.981750044 |
| ENSMUSG00000111516 | CR954983.1 | 0.003866685  | 0.946735531 | 0.981750044 |
| ENSMUSG00000039478 | Micu3      | 0.004551141  | 0.947142646 | 0.982044921 |
| ENSMUSG00000054027 | Nt5dc3     | -0.003356787 | 0.947178018 | 0.982044921 |
| ENSMUSG00000006526 | Tmem110    | -0.005493184 | 0.947296845 | 0.982080585 |
| ENSMUSG00000022665 | Ccdc80     | -0.003151379 | 0.9474533   | 0.982080585 |
| ENSMUSG00000025337 | Sbds       | 0.005606363  | 0.947642469 | 0.982080585 |
| ENSMUSG00000026179 | Pnkd       | 0.006247363  | 0.947686812 | 0.982080585 |
| ENSMUSG00000037216 | Lipt1      | -0.005167525 | 0.947619838 | 0.982080585 |
| ENSMUSG00000074735 | Gm21994    | -0.004670809 | 0.947565625 | 0.982080585 |
| ENSMUSG00000021069 | Pygl       | 0.006317537  | 0.948266621 | 0.982353603 |
| ENSMUSG00000028706 | Nsun4      | -0.00563282  | 0.948199573 | 0.982353603 |
| ENSMUSG00000030428 | Ttyh1      | 0.003979071  | 0.948237383 | 0.982353603 |
| ENSMUSG00000036160 | Surf6      | 0.005265252  | 0.948238738 | 0.982353603 |
| ENSMUSG00000028553 | Angptl3    | 0.003948144  | 0.948676684 | 0.982445099 |
| ENSMUSG00000047205 | Dusp18     | 0.00335259   | 0.948657891 | 0.982445099 |
| ENSMUSG00000064109 | Hcst       | -0.00556422  | 0.948517822 | 0.982445099 |
| ENSMUSG00000078994 | Zfp429     | -0.005026519 | 0.948750419 | 0.982445099 |
| ENSMUSG00000113606 | Gm47441    | 0.005787567  | 0.948631369 | 0.982445099 |
| ENSMUSG00000009248 | Ascl2      | -0.005021999 | 0.949034995 | 0.98257595  |

|                    |               |              |             |             |
|--------------------|---------------|--------------|-------------|-------------|
| ENSMUSG00000061175 | Fnip2         | -0.003960751 | 0.948980691 | 0.98257595  |
| ENSMUSG00000025782 | Taf3          | -0.005387095 | 0.949280773 | 0.982742934 |
| ENSMUSG00000028673 | Fuca1         | -0.005249346 | 0.949384033 | 0.982742934 |
| ENSMUSG00000047045 | Tmem164       | 0.005623019  | 0.949512757 | 0.982742934 |
| ENSMUSG00000086473 | Gm16265       | 0.004273301  | 0.949478062 | 0.982742934 |
| ENSMUSG00000024286 | Ccny          | -0.002561912 | 0.949894511 | 0.982836294 |
| ENSMUSG00000028636 | Ppcs          | -0.005227321 | 0.949855819 | 0.982836294 |
| ENSMUSG00000029407 | Uso1          | 0.005665548  | 0.950156848 | 0.982836294 |
| ENSMUSG00000034663 | Bmp2k         | -0.005282937 | 0.949766131 | 0.982836294 |
| ENSMUSG00000034855 | Cxcl10        | -0.003088657 | 0.95010384  | 0.982836294 |
| ENSMUSG00000038685 | Rtel1         | -0.004619889 | 0.95014673  | 0.982836294 |
| ENSMUSG00000043542 | Zc2hc1a       | 0.005444766  | 0.950026805 | 0.982836294 |
| ENSMUSG00000040385 | Ppp1ca        | 0.008740242  | 0.950344351 | 0.982916773 |
| ENSMUSG00000040652 | Oaz2          | 0.005941814  | 0.950392919 | 0.982916773 |
| ENSMUSG00000000753 | Serpinf1      | -0.004482134 | 0.950607291 | 0.983056628 |
| ENSMUSG00000050088 | 1600012H06Rik | 0.005545815  | 0.950755765 | 0.983128318 |
| ENSMUSG00000003402 | Prkcsh        | 0.005352002  | 0.951606596 | 0.98313747  |
| ENSMUSG00000003421 | Nosip         | -0.005043005 | 0.951583303 | 0.98313747  |
| ENSMUSG00000020100 | Slc29a3       | -0.013952413 | 0.950980193 | 0.98313747  |
| ENSMUSG00000024236 | Svil          | -0.004968549 | 0.95170441  | 0.98313747  |
| ENSMUSG00000031922 | Cep57         | -0.005108662 | 0.951468524 | 0.98313747  |
| ENSMUSG00000032113 | Chek1         | -0.00514663  | 0.951002001 | 0.98313747  |
| ENSMUSG00000039789 | Zfp597        | -0.003920658 | 0.951600611 | 0.98313747  |
| ENSMUSG00000040298 | Btbd16        | -0.00288767  | 0.951631325 | 0.98313747  |
| ENSMUSG00000053178 | Mterf1b       | -0.004583872 | 0.951668947 | 0.98313747  |
| ENSMUSG00000053181 | A830005F24Rik | -0.003586202 | 0.951793582 | 0.98313747  |
| ENSMUSG00000069020 | Urm1          | -0.004870553 | 0.951711723 | 0.98313747  |
| ENSMUSG00000112516 | Gm47968       | 0.002590537  | 0.951439482 | 0.98313747  |
| ENSMUSG00000115018 | AL732309.1    | 0.00352561   | 0.951769773 | 0.98313747  |
| ENSMUSG00000049164 | Zfp518a       | -0.004734326 | 0.951877802 | 0.983142705 |
| ENSMUSG00000032562 | Gnai2         | 0.004503747  | 0.952310448 | 0.983435204 |
| ENSMUSG00000040648 | Ppip5k2       | 0.004936825  | 0.952319349 | 0.983435204 |
| ENSMUSG00000020261 | Slc36a1       | 0.004244369  | 0.952425288 | 0.98346284  |
| ENSMUSG00000016427 | Ndufa1        | 0.005379392  | 0.952591137 | 0.983470577 |
| ENSMUSG00000021694 | Erc8          | 0.005348167  | 0.952513676 | 0.983470577 |
| ENSMUSG00000016481 | Cr1l          | 0.007793489  | 0.952745916 | 0.983548622 |
| ENSMUSG00000028127 | Abcd3         | -0.00474311  | 0.952959096 | 0.983645955 |
| ENSMUSG00000040007 | Bahd1         | 0.004218596  | 0.952998585 | 0.983645955 |
| ENSMUSG00000027438 | Napb          | -0.002525142 | 0.953166625 | 0.98365592  |
| ENSMUSG00000032869 | Psmf1         | 0.005349297  | 0.95309343  | 0.98365592  |
| ENSMUSG00000028687 | Mutyh         | -0.004756825 | 0.953665682 | 0.983762265 |
| ENSMUSG00000030990 | Pgap2         | -0.005009891 | 0.953556198 | 0.983762265 |
| ENSMUSG00000040323 | Gm15429       | 0.000863867  | 0.953563452 | 0.983762265 |

|                    |          |              |             |             |
|--------------------|----------|--------------|-------------|-------------|
| ENSMUSG00000066150 | Slc31a1  | 0.004754947  | 0.953559842 | 0.983762265 |
| ENSMUSG00000068735 | Trp53i11 | 0.003189912  | 0.953589138 | 0.983762265 |
| ENSMUSG00000049321 | Zfp2     | 0.002948056  | 0.953848562 | 0.983862789 |
| ENSMUSG00000110105 | Gm45844  | -0.00204118  | 0.953921549 | 0.983862789 |
| ENSMUSG00000071350 | Setdb2   | -0.004225676 | 0.954030856 | 0.983893828 |
| ENSMUSG00000021265 | Slc25a29 | -0.015081732 | 0.954485035 | 0.984128017 |
| ENSMUSG00000024091 | Vapa     | -0.008765819 | 0.954528657 | 0.984128017 |
| ENSMUSG00000030207 | Fam234b  | -0.002856216 | 0.95450799  | 0.984128017 |
| ENSMUSG00000031628 | Casp3    | -0.00469792  | 0.954574861 | 0.984128017 |
| ENSMUSG00000107071 | Gm42420  | 0.003628063  | 0.954684886 | 0.984159762 |
| ENSMUSG00000024978 | Gpam     | 0.003830559  | 0.954937842 | 0.984338833 |
| ENSMUSG00000024146 | Cript    | -0.003421851 | 0.955070395 | 0.984393774 |
| ENSMUSG00000090110 | Cmc4     | 0.004481048  | 0.955571862 | 0.984828916 |
| ENSMUSG00000009076 | Zmat5    | 0.005135971  | 0.955668703 | 0.984847006 |
| ENSMUSG00000014503 | Pkd2l2   | 0.003183594  | 0.956012582 | 0.984956228 |
| ENSMUSG00000024613 | Tcof1    | -0.004485073 | 0.955978077 | 0.984956228 |
| ENSMUSG00000115287 | Gm49111  | -0.002435622 | 0.955876911 | 0.984956228 |
| ENSMUSG00000003382 | Etv3     | -0.003984095 | 0.957724163 | 0.985028393 |
| ENSMUSG00000019338 | Zfp687   | -0.00271624  | 0.957664016 | 0.985028393 |
| ENSMUSG00000019428 | Fkbp8    | 0.004754686  | 0.95687591  | 0.985028393 |
| ENSMUSG00000019578 | Ubxn6    | 0.004759913  | 0.957578277 | 0.985028393 |
| ENSMUSG00000021048 | Mthfd1   | -0.004637914 | 0.95662905  | 0.985028393 |
| ENSMUSG00000021824 | Ap3m1    | 0.004966827  | 0.956629573 | 0.985028393 |
| ENSMUSG00000026975 | Dph7     | 0.004841927  | 0.957409564 | 0.985028393 |
| ENSMUSG00000028988 | Ctnnbip1 | -0.004213846 | 0.95652458  | 0.985028393 |
| ENSMUSG00000029169 | Dhx15    | 0.004425491  | 0.957827303 | 0.985028393 |
| ENSMUSG00000029817 | Tra2a    | -0.004393931 | 0.957663599 | 0.985028393 |
| ENSMUSG00000031668 | Eif2ak3  | -0.00403165  | 0.956584937 | 0.985028393 |
| ENSMUSG00000032952 | Ap4b1    | 0.004794377  | 0.957436827 | 0.985028393 |
| ENSMUSG00000035469 | Rcbtb1   | 0.004778638  | 0.957212086 | 0.985028393 |
| ENSMUSG00000035517 | Tdrd7    | 0.002160661  | 0.957556551 | 0.985028393 |
| ENSMUSG00000037493 | Cib2     | 0.004220871  | 0.957597943 | 0.985028393 |
| ENSMUSG00000039753 | Fbxl5    | 0.004802083  | 0.957794485 | 0.985028393 |
| ENSMUSG00000039967 | Zfp292   | -0.004322518 | 0.957518194 | 0.985028393 |
| ENSMUSG00000060678 | Hist1h4c | -0.003050381 | 0.957121724 | 0.985028393 |
| ENSMUSG00000078515 | Ddi2     | 0.005021111  | 0.956329619 | 0.985028393 |
| ENSMUSG00000085998 | AW822252 | 0.004385948  | 0.957083139 | 0.985028393 |
| ENSMUSG00000102059 | Gm20257  | 0.004809677  | 0.957079217 | 0.985028393 |
| ENSMUSG00000111164 | Gm47803  | 0.003433643  | 0.957671797 | 0.985028393 |
| ENSMUSG00000035202 | Lars2    | -0.004374939 | 0.957995263 | 0.985119559 |
| ENSMUSG00000034194 | R3hcc1   | -0.008504592 | 0.958104292 | 0.985150117 |
| ENSMUSG00000068245 | Phf11d   | 0.003350666  | 0.958214956 | 0.98518235  |
| ENSMUSG00000007570 | Fance    | 0.004524052  | 0.958562197 | 0.985301821 |

|                    |          |              |             |             |
|--------------------|----------|--------------|-------------|-------------|
| ENSMUSG00000052565 | Hist1h1d | 0.002867924  | 0.958452986 | 0.985301821 |
| ENSMUSG00000085281 | Gm13316  | -0.003393794 | 0.958569134 | 0.985301821 |
| ENSMUSG00000010914 | Pd hx    | -0.004431277 | 0.9587573   | 0.985353753 |
| ENSMUSG00000046711 | Hmga1    | 0.003458641  | 0.958778316 | 0.985353753 |
| ENSMUSG00000039501 | Znfx1    | 0.003873584  | 0.959170983 | 0.985549054 |
| ENSMUSG00000074527 | Gm14296  | -0.003893875 | 0.959206386 | 0.985549054 |
| ENSMUSG00000089929 | Bcl2a1b  | 0.002436301  | 0.959093797 | 0.985549054 |
| ENSMUSG00000111635 | Gm47240  | 0.002789687  | 0.959294566 | 0.985558131 |
| ENSMUSG00000071715 | Ncf4     | -0.000792892 | 0.959540101 | 0.985728856 |
| ENSMUSG00000013878 | Rnf170   | 0.004393942  | 0.959950588 | 0.985936944 |
| ENSMUSG00000021819 | Zswim8   | -0.002914903 | 0.959924113 | 0.985936944 |
| ENSMUSG00000091228 | Gm20390  | 0.002822275  | 0.959980791 | 0.985936944 |
| ENSMUSG00000038206 | Fbxo8    | -0.004247037 | 0.960072355 | 0.985949461 |
| ENSMUSG00000021900 | Btd      | -0.003932789 | 0.960497752 | 0.98607163  |
| ENSMUSG00000026279 | Thap4    | 0.004395031  | 0.960588255 | 0.98607163  |
| ENSMUSG00000036854 | Hspb6    | 0.002843857  | 0.960538671 | 0.98607163  |
| ENSMUSG00000048439 | Nupl2    | -0.007016515 | 0.960456544 | 0.98607163  |
| ENSMUSG00000074826 | Gm10767  | -0.002460387 | 0.960485472 | 0.98607163  |
| ENSMUSG00000056698 | Elmod3   | -0.004057987 | 0.960922545 | 0.986333273 |
| ENSMUSG00000002257 | Def6     | 0.007560682  | 0.961109532 | 0.986443686 |
| ENSMUSG00000020079 | Supv3l1  | 0.003044736  | 0.961384297 | 0.986644166 |
| ENSMUSG00000032688 | Malt1    | 0.003785593  | 0.961517202 | 0.986699039 |
| ENSMUSG00000031616 | Ednra    | -0.002286618 | 0.961941917 | 0.986971795 |
| ENSMUSG00000040441 | Slc26a10 | 0.004038367  | 0.961905359 | 0.986971795 |
| ENSMUSG00000008976 | Gabpa    | 0.004319021  | 0.962065209 | 0.987016764 |
| ENSMUSG00000000028 | Cdc45    | -0.003741148 | 0.963017599 | 0.987235404 |
| ENSMUSG00000002602 | Axl      | 0.002369946  | 0.962629095 | 0.987235404 |
| ENSMUSG00000027784 | Ppm1l    | -0.001441381 | 0.963073134 | 0.987235404 |
| ENSMUSG00000032077 | Bud13    | -0.005239286 | 0.96288343  | 0.987235404 |
| ENSMUSG00000033880 | Lgals3bp | -0.003254721 | 0.962606422 | 0.987235404 |
| ENSMUSG00000046027 | Stard5   | -0.003920401 | 0.962493711 | 0.987235404 |
| ENSMUSG00000055137 | Sugct    | 0.003125572  | 0.962942952 | 0.987235404 |
| ENSMUSG00000066122 | Olfr45   | 0.002295841  | 0.962836574 | 0.987235404 |
| ENSMUSG00000070923 | Klhl9    | 0.00403801   | 0.962870706 | 0.987235404 |
| ENSMUSG00000098789 | Jmjd7    | -0.003708572 | 0.962842875 | 0.987235404 |
| ENSMUSG00000022270 | Retreg1  | -0.003542972 | 0.963636364 | 0.987341161 |
| ENSMUSG00000027514 | Zbp1     | -0.002295524 | 0.963971199 | 0.987341161 |
| ENSMUSG00000034987 | Hrh2     | -0.003420352 | 0.963932284 | 0.987341161 |
| ENSMUSG00000040511 | Pvr      | 0.003456251  | 0.963306891 | 0.987341161 |
| ENSMUSG00000042644 | Itpr3    | -0.002718135 | 0.963757561 | 0.987341161 |
| ENSMUSG00000048234 | Rnf149   | 0.004331579  | 0.963796499 | 0.987341161 |
| ENSMUSG00000054843 | Atrnl1   | 0.003105087  | 0.963908447 | 0.987341161 |
| ENSMUSG00000062588 | Gm6104   | -0.002752265 | 0.963802769 | 0.987341161 |

|                    |           |              |             |             |
|--------------------|-----------|--------------|-------------|-------------|
| ENSMUSG00000064358 | mt-Co3    | 0.002399465  | 0.963679314 | 0.987341161 |
| ENSMUSG00000098022 | Zfp82     | -0.002267479 | 0.96376672  | 0.987341161 |
| ENSMUSG00000024666 | Tmem138   | -0.003961309 | 0.964090386 | 0.987381818 |
| ENSMUSG00000011254 | Thg1l     | -0.003370294 | 0.964479559 | 0.987454715 |
| ENSMUSG00000021072 | Tmx1      | 0.004077066  | 0.964284253 | 0.987454715 |
| ENSMUSG00000038827 | Fam206a   | 0.003987138  | 0.964414616 | 0.987454715 |
| ENSMUSG00000082095 | Gm11991   | -0.002692933 | 0.96435251  | 0.987454715 |
| ENSMUSG00000022961 | Son       | -0.003614844 | 0.964640358 | 0.987456559 |
| ENSMUSG00000048281 | Dleu7     | -0.002432439 | 0.964630822 | 0.987456559 |
| ENSMUSG00000018001 | Cyth3     | 0.003038309  | 0.965261658 | 0.988011129 |
| ENSMUSG00000038982 | Bloc1s5   | -0.003547762 | 0.9653728   | 0.988043469 |
| ENSMUSG00000003038 | Hmgn2     | 0.004026361  | 0.966042536 | 0.988409766 |
| ENSMUSG00000033916 | Chmp2a    | -7.04E-05    | 0.96595999  | 0.988409766 |
| ENSMUSG00000035048 | Anapc13   | 0.00173473   | 0.96588115  | 0.988409766 |
| ENSMUSG00000061724 | Gm2423    | -0.003455072 | 0.966048994 | 0.988409766 |
| ENSMUSG00000026082 | Rev1      | -0.005760719 | 0.966366114 | 0.988652788 |
| ENSMUSG00000021039 | Snw1      | -0.003409218 | 0.966481293 | 0.98868919  |
| ENSMUSG00000021596 | Mctp1     | -0.003242897 | 0.966647968 | 0.98877826  |
| ENSMUSG00000038366 | Lasp1     | -0.00160133  | 0.966806526 | 0.988849426 |
| ENSMUSG00000115637 | Gm30970   | -0.002695128 | 0.966876763 | 0.988849426 |
| ENSMUSG00000058254 | Tspan7    | -0.002927798 | 0.966961706 | 0.988854878 |
| ENSMUSG00000032449 | Slc25a36  | 0.003145675  | 0.967193164 | 0.98901015  |
| ENSMUSG00000030967 | Zranb1    | -0.003217055 | 0.967384669 | 0.989124545 |
| ENSMUSG00000022359 | Wdyhv1    | -0.003290089 | 0.967498472 | 0.989159479 |
| ENSMUSG00000048697 | Vmn1r26   | -0.001337048 | 0.967786662 | 0.989372685 |
| ENSMUSG00000029577 | Ube3b     | -0.003319369 | 0.968057267 | 0.98956788  |
| ENSMUSG00000018428 | Akap1     | 0.003614706  | 0.968348479 | 0.989657703 |
| ENSMUSG00000040147 | Maob      | -0.002088181 | 0.968384165 | 0.989657703 |
| ENSMUSG00000055334 | Snupn     | 0.003506677  | 0.968352369 | 0.989657703 |
| ENSMUSG00000022244 | Amacr     | 0.003551197  | 0.968611486 | 0.989727153 |
| ENSMUSG00000029500 | Pgam5     | -0.003086363 | 0.968605515 | 0.989727153 |
| ENSMUSG00000026134 | Prim2     | -0.002707701 | 0.968966563 | 0.9899271   |
| ENSMUSG00000029575 | Mmab      | 0.003503567  | 0.968962913 | 0.9899271   |
| ENSMUSG00000024830 | Rps6kb2   | -0.00314822  | 0.969294877 | 0.989936825 |
| ENSMUSG00000026827 | Gpd2      | 0.001905719  | 0.969253193 | 0.989936825 |
| ENSMUSG00000029004 | Kmt2e     | -0.003174036 | 0.969280281 | 0.989936825 |
| ENSMUSG00000044811 | Cd300c2   | -0.002687521 | 0.969277246 | 0.989936825 |
| ENSMUSG00000026869 | Psmc5     | 0.006447325  | 0.969563756 | 0.99004862  |
| ENSMUSG00000027293 | Ehd4      | 0.003337093  | 0.969544283 | 0.99004862  |
| ENSMUSG00000072845 | Tmprss11a | -0.002204014 | 0.970074551 | 0.990488779 |
| ENSMUSG00000037553 | Zdhhc18   | 0.002982754  | 0.970490197 | 0.990831723 |
| ENSMUSG00000042842 | Serpinc6b | 0.00115149   | 0.970819998 | 0.991086972 |
| ENSMUSG00000005312 | Ubqln1    | 0.00373895   | 0.970927674 | 0.991115437 |

|                    |             |              |             |             |
|--------------------|-------------|--------------|-------------|-------------|
| ENSMUSG00000030180 | Kdm5a       | 0.003258021  | 0.971165524 | 0.991195314 |
| ENSMUSG00000035247 | Hectd1      | -0.002999454 | 0.971123961 | 0.991195314 |
| ENSMUSG00000041679 | Lrrc29      | -0.002059441 | 0.9714407   | 0.991394703 |
| ENSMUSG00000011263 | Exoc3l2     | -0.001820621 | 0.971648814 | 0.991455505 |
| ENSMUSG00000021025 | Nfkbia      | 0.003291865  | 0.971789548 | 0.991455505 |
| ENSMUSG00000049354 | Dcaf7       | 0.003108828  | 0.971800607 | 0.991455505 |
| ENSMUSG00000083855 | Olfr1175-ps | -0.00189795  | 0.971819561 | 0.991455505 |
| ENSMUSG00000003500 | Impdh1      | 0.002853344  | 0.972557459 | 0.992038653 |
| ENSMUSG00000032228 | Tcf12       | 0.003113147  | 0.972480073 | 0.992038653 |
| ENSMUSG00000047222 | Rnase2a     | -0.00123432  | 0.972667754 | 0.992038653 |
| ENSMUSG00000097025 | Gm26558     | -0.001544574 | 0.972710631 | 0.992038653 |
| ENSMUSG00000024620 | Pdgfrb      | 0.002597061  | 0.972986055 | 0.992238078 |
| ENSMUSG00000001767 | Crnk1       | 0.002985405  | 0.97371296  | 0.992246179 |
| ENSMUSG00000022787 | Wdr53       | 0.002939614  | 0.973681875 | 0.992246179 |
| ENSMUSG00000026966 | Ssna1       | -0.002929542 | 0.973349488 | 0.992246179 |
| ENSMUSG00000029772 | Ahcyl2      | 0.002293447  | 0.973407859 | 0.992246179 |
| ENSMUSG00000042622 | Maff        | -0.002551343 | 0.97342327  | 0.992246179 |
| ENSMUSG00000049287 | Iba57       | 0.002566818  | 0.973485905 | 0.992246179 |
| ENSMUSG00000070476 | Fam217b     | 0.001843323  | 0.973588707 | 0.992246179 |
| ENSMUSG00000079509 | Zfx         | -0.002557594 | 0.973280513 | 0.992246179 |
| ENSMUSG00000080797 | Gm15760     | -0.00103931  | 0.973537898 | 0.992246179 |
| ENSMUSG00000000881 | Dlg3        | -0.001495539 | 0.974184983 | 0.992564324 |
| ENSMUSG00000048222 | Mfap1b      | -0.002566652 | 0.974143781 | 0.992564324 |
| ENSMUSG00000038848 | Ythdf1      | -0.002346021 | 0.974489772 | 0.992793427 |
| ENSMUSG00000066440 | Zfyve26     | -0.001788782 | 0.974576554 | 0.992800408 |
| ENSMUSG00000013629 | Cad         | 0.002793137  | 0.974807217 | 0.992953948 |
| ENSMUSG00000113667 | Gm47853     | -0.001218202 | 0.975312813 | 0.993387491 |
| ENSMUSG00000025873 | Faf2        | -0.002434802 | 0.976026368 | 0.993629555 |
| ENSMUSG00000031708 | Tecr        | 0.005298888  | 0.975894776 | 0.993629555 |
| ENSMUSG00000047996 | Prrg1       | -0.001652472 | 0.97597661  | 0.993629555 |
| ENSMUSG00000079492 | Gm11127     | -0.001189997 | 0.976030449 | 0.993629555 |
| ENSMUSG00000095432 | Zfp748      | 0.002727286  | 0.975981464 | 0.993629555 |
| ENSMUSG00000116235 | Trerf1      | -0.001707972 | 0.975895346 | 0.993629555 |
| ENSMUSG00000028088 | Fmo5        | 0.002428601  | 0.976212674 | 0.993652186 |
| ENSMUSG00000042320 | Prox2       | -0.001440782 | 0.976186076 | 0.993652186 |
| ENSMUSG00000038973 | Cldnd2      | 0.001894335  | 0.976343469 | 0.993703887 |
| ENSMUSG00000059708 | Akap17b     | -0.001919472 | 0.976473534 | 0.993706791 |
| ENSMUSG00000075419 | Dolk        | 0.0026876    | 0.976506327 | 0.993706791 |
| ENSMUSG00000032115 | Hyou1       | 0.002066181  | 0.976747426 | 0.993870711 |
| ENSMUSG00000001445 | Mrpl10      | -0.00209235  | 0.977035067 | 0.993919129 |
| ENSMUSG00000030303 | Far2        | -0.0023751   | 0.976996581 | 0.993919129 |
| ENSMUSG00000062397 | Zfp706      | -0.002308614 | 0.976875168 | 0.993919129 |
| ENSMUSG00000039166 | Akap7       | 0.001990382  | 0.977370701 | 0.993971569 |

|                    |               |              |             |             |
|--------------------|---------------|--------------|-------------|-------------|
| ENSMUSG00000039748 | Exo1          | -0.002106596 | 0.977447404 | 0.993971569 |
| ENSMUSG00000047407 | Tgif1         | 0.002261628  | 0.977599829 | 0.993971569 |
| ENSMUSG00000052477 | C130026I21Rik | -0.001326346 | 0.97735974  | 0.993971569 |
| ENSMUSG00000065952 | C330021F23Rik | -0.001646885 | 0.977212045 | 0.993971569 |
| ENSMUSG00000090655 | Vmn2r120      | -0.001468409 | 0.977660218 | 0.993971569 |
| ENSMUSG00000092607 | Scnm1         | -0.001601174 | 0.977726804 | 0.993971569 |
| ENSMUSG00000115020 | Vmn1r218      | -0.001335603 | 0.977685468 | 0.993971569 |
| ENSMUSG00000000708 | Kat2b         | -0.001363955 | 0.978170275 | 0.994064252 |
| ENSMUSG00000006344 | Ggt5          | 0.001336206  | 0.979271369 | 0.994064252 |
| ENSMUSG00000010048 | Ifrd2         | 0.002259341  | 0.979498621 | 0.994064252 |
| ENSMUSG00000017861 | Mybl2         | -0.001882499 | 0.979191404 | 0.994064252 |
| ENSMUSG00000021767 | Kat6b         | 0.001865827  | 0.97936819  | 0.994064252 |
| ENSMUSG00000022034 | Esco2         | 0.002596771  | 0.977997206 | 0.994064252 |
| ENSMUSG00000023075 | Akirin1       | 0.002295811  | 0.979244389 | 0.994064252 |
| ENSMUSG00000027957 | Slc35a3       | 0.002428261  | 0.978511241 | 0.994064252 |
| ENSMUSG00000029442 | Wdr66         | -0.001691976 | 0.979246272 | 0.994064252 |
| ENSMUSG00000031229 | Atrx          | 0.001896384  | 0.978781901 | 0.994064252 |
| ENSMUSG00000032757 | Bet1          | 0.002374752  | 0.978510682 | 0.994064252 |
| ENSMUSG00000037857 | Nufip2        | 0.001825155  | 0.978233434 | 0.994064252 |
| ENSMUSG00000039236 | Isg20         | 0.002388483  | 0.978974351 | 0.994064252 |
| ENSMUSG00000052942 | Glis3         | -0.001237424 | 0.978338739 | 0.994064252 |
| ENSMUSG00000057098 | Ebf1          | -0.001687195 | 0.979266789 | 0.994064252 |
| ENSMUSG00000068200 | Gm5931        | -0.001999839 | 0.978993825 | 0.994064252 |
| ENSMUSG00000078866 | Zfp970        | -0.001730261 | 0.978950344 | 0.994064252 |
| ENSMUSG00000082947 | Gm12587       | 0.001691401  | 0.979194276 | 0.994064252 |
| ENSMUSG00000091450 | Vmn2r11       | -0.001106082 | 0.978176622 | 0.994064252 |
| ENSMUSG00000113600 | Gm7868        | -0.001153245 | 0.979411895 | 0.994064252 |
| ENSMUSG00000113836 | Gm3325        | -0.001641122 | 0.97948056  | 0.994064252 |
| ENSMUSG00000026655 | Fam107b       | 0.002361848  | 0.979755824 | 0.994190732 |
| ENSMUSG00000028826 | Maco1         | 0.002265108  | 0.979943413 | 0.994190732 |
| ENSMUSG00000050174 | Nudt6         | -0.002073799 | 0.979791137 | 0.994190732 |
| ENSMUSG00000067713 | Prkag1        | -0.004442114 | 0.979923556 | 0.994190732 |
| ENSMUSG00000017210 | Med24         | 0.002227772  | 0.980364645 | 0.994402953 |
| ENSMUSG00000020392 | Cdkn2aipnl    | -0.00173957  | 0.980320131 | 0.994402953 |
| ENSMUSG00000038260 | Trpm4         | -0.000913107 | 0.980470097 | 0.994402953 |
| ENSMUSG00000040483 | Xaf1          | 0.003926486  | 0.980552883 | 0.994402953 |
| ENSMUSG00000100025 | Gm8141        | -0.001095763 | 0.980501171 | 0.994402953 |
| ENSMUSG00000008384 | Sertad1       | 0.001708804  | 0.980885488 | 0.994415495 |
| ENSMUSG00000021094 | Dhrs7         | 0.002186202  | 0.980820934 | 0.994415495 |
| ENSMUSG00000047648 | Fbxo30        | -0.002024772 | 0.980782254 | 0.994415495 |
| ENSMUSG00000113149 | Gm49383       | 0.002186512  | 0.980653604 | 0.994415495 |
| ENSMUSG00000004609 | Cd33          | -0.001534578 | 0.98101215  | 0.994462737 |
| ENSMUSG00000078898 | Zfp968        | 0.001018695  | 0.981215916 | 0.994588125 |

|                    |           |              |             |             |
|--------------------|-----------|--------------|-------------|-------------|
| ENSMUSG00000058246 | Gm10037   | 0.00101957   | 0.98143228  | 0.994726263 |
| ENSMUSG00000020832 | Eral1     | 0.003348148  | 0.981562727 | 0.994738195 |
| ENSMUSG00000033319 | Fem1c     | -0.001887697 | 0.981604223 | 0.994738195 |
| ENSMUSG00000035093 | Secisbp2l | 0.002103364  | 0.981697395 | 0.994751455 |
| ENSMUSG00000043881 | Kbtbd7    | -0.001446456 | 0.981846656 | 0.994821545 |
| ENSMUSG00000042251 | Pm20d1    | 0.00083131   | 0.982035036 | 0.994931255 |
| ENSMUSG00000071076 | Jund      | 0.000989539  | 0.982396251 | 0.995216037 |
| ENSMUSG00000051098 | Mblac2    | -0.001736504 | 0.982581032 | 0.995322051 |
| ENSMUSG00000013662 | Atad1     | -0.001618979 | 0.982900991 | 0.995436953 |
| ENSMUSG00000021592 | Arsk      | 0.001805615  | 0.982934887 | 0.995436953 |
| ENSMUSG00000024033 | Rsph1     | -0.00130625  | 0.982919748 | 0.995436953 |
| ENSMUSG00000058704 | Memo1     | -0.001297369 | 0.983309711 | 0.99573536  |
| ENSMUSG00000004768 | Rab23     | 0.001525188  | 0.98407746  | 0.995892086 |
| ENSMUSG00000017412 | Cacnb4    | 0.000947985  | 0.984696506 | 0.995892086 |
| ENSMUSG00000017679 | Ttpal     | -0.002413113 | 0.984214338 | 0.995892086 |
| ENSMUSG00000021033 | Gstz1     | 0.001753759  | 0.983661499 | 0.995892086 |
| ENSMUSG00000022500 | Litaf     | 0.001820775  | 0.984747331 | 0.995892086 |
| ENSMUSG00000026111 | Unc50     | 0.001878321  | 0.984707211 | 0.995892086 |
| ENSMUSG00000029640 | Usp12     | -0.001004325 | 0.984490513 | 0.995892086 |
| ENSMUSG00000033285 | Wdr3      | -0.002136322 | 0.984384039 | 0.995892086 |
| ENSMUSG00000036155 | Mgat5     | 0.001845125  | 0.984604553 | 0.995892086 |
| ENSMUSG00000037326 | Capn15    | 0.001528518  | 0.984076506 | 0.995892086 |
| ENSMUSG00000042446 | Zmym4     | -0.001471085 | 0.984131455 | 0.995892086 |
| ENSMUSG00000053038 | Gm6180    | -0.001344418 | 0.984372474 | 0.995892086 |
| ENSMUSG00000075359 | Gm20775   | -1.84E-05    | 0.984260573 | 0.995892086 |
| ENSMUSG00000094932 | Gm2007    | -0.001404645 | 0.984731597 | 0.995892086 |
| ENSMUSG00000098387 | Pet117    | 0.001678009  | 0.984643026 | 0.995892086 |
| ENSMUSG00000100838 | Gm29094   | 0.001684583  | 0.983979786 | 0.995892086 |
| ENSMUSG00000024150 | Mcfd2     | 0.001887136  | 0.984842027 | 0.995906767 |
| ENSMUSG00000023009 | Nckap5l   | 0.000645727  | 0.985112126 | 0.996001919 |
| ENSMUSG00000026955 | Sapcd2    | -0.001477606 | 0.985176683 | 0.996001919 |
| ENSMUSG00000049659 | Aftph     | 0.001521659  | 0.985028825 | 0.996001919 |
| ENSMUSG00000020381 | Mrnip     | -0.001449461 | 0.985410094 | 0.996075747 |
| ENSMUSG00000089976 | Gm2389    | 0.001031795  | 0.985363886 | 0.996075747 |
| ENSMUSG00000061613 | U2af1     | 0.001033144  | 0.985553896 | 0.996140039 |
| ENSMUSG00000020309 | Chac2     | 0.001558847  | 0.986821852 | 0.996166197 |
| ENSMUSG00000022064 | Pibf1     | -0.001146648 | 0.987263927 | 0.996166197 |
| ENSMUSG00000022246 | Rai14     | 0.001271691  | 0.98627935  | 0.996166197 |
| ENSMUSG00000026239 | Pde6d     | -0.00098909  | 0.986862271 | 0.996166197 |
| ENSMUSG00000027601 | Mtfr1     | 0.001677644  | 0.986170379 | 0.996166197 |
| ENSMUSG00000027722 | Spata5    | 0.001536445  | 0.987563234 | 0.996166197 |
| ENSMUSG00000030595 | Nfkbib    | 0.001421891  | 0.987559342 | 0.996166197 |
| ENSMUSG00000032204 | Aqp9      | -0.000680807 | 0.987196777 | 0.996166197 |

|                    |               |              |             |             |
|--------------------|---------------|--------------|-------------|-------------|
| ENSMUSG00000036202 | Rif1          | 0.002123129  | 0.986501519 | 0.996166197 |
| ENSMUSG00000039089 | L3mbtl3       | -0.000808131 | 0.987345154 | 0.996166197 |
| ENSMUSG00000040296 | Ddx58         | -0.001318879 | 0.986256775 | 0.996166197 |
| ENSMUSG00000040731 | Eif4h         | 0.001230236  | 0.986893278 | 0.996166197 |
| ENSMUSG00000040760 | Appl1         | -0.001361481 | 0.986208157 | 0.996166197 |
| ENSMUSG00000040782 | Cop1          | -0.00123058  | 0.987272993 | 0.996166197 |
| ENSMUSG00000046010 | Zfp830        | -0.001378137 | 0.985843329 | 0.996166197 |
| ENSMUSG00000046057 | Gm15428       | 0.00142361   | 0.987167467 | 0.996166197 |
| ENSMUSG00000051232 | Tmem199       | 0.001491134  | 0.987317309 | 0.996166197 |
| ENSMUSG00000052302 | Tbc1d30       | -0.000643286 | 0.986587913 | 0.996166197 |
| ENSMUSG00000052852 | Reep1         | 0.000786168  | 0.987584779 | 0.996166197 |
| ENSMUSG00000053702 | Nabl          | -0.000371963 | 0.985701439 | 0.996166197 |
| ENSMUSG00000056999 | Ide           | -0.001243219 | 0.987491914 | 0.996166197 |
| ENSMUSG00000062098 | Btbd3         | -0.000790662 | 0.987146661 | 0.996166197 |
| ENSMUSG00000066270 | Gm10157       | 0.001687646  | 0.987489709 | 0.996166197 |
| ENSMUSG00000079884 | Gm10698       | 0.001604831  | 0.98701226  | 0.996166197 |
| ENSMUSG00000090790 | Gm17377       | 0.00118996   | 0.98691483  | 0.996166197 |
| ENSMUSG00000019916 | P4ha1         | -0.000984271 | 0.98860421  | 0.996331522 |
| ENSMUSG00000024911 | Fibp          | -0.001077701 | 0.988603804 | 0.996331522 |
| ENSMUSG00000025200 | Cwf19l1       | -0.001074206 | 0.988115584 | 0.996331522 |
| ENSMUSG00000028410 | Dnaja1        | 0.00064528   | 0.988029287 | 0.996331522 |
| ENSMUSG00000036792 | Mbd5          | -0.000797291 | 0.988527226 | 0.996331522 |
| ENSMUSG00000043872 | Zmym1         | -0.000930568 | 0.988575692 | 0.996331522 |
| ENSMUSG00000046675 | Tmem251       | 0.001283834  | 0.988472731 | 0.996331522 |
| ENSMUSG00000047369 | Dnah14        | -0.000532511 | 0.988631029 | 0.996331522 |
| ENSMUSG00000052713 | Zfp608        | -0.000930014 | 0.987970864 | 0.996331522 |
| ENSMUSG00000062794 | Zfp599        | -0.000845727 | 0.987927462 | 0.996331522 |
| ENSMUSG00000071553 | Cpa2          | -0.00045062  | 0.988504955 | 0.996331522 |
| ENSMUSG00000062270 | Morf4l1       | -0.000984694 | 0.988741066 | 0.996361575 |
| ENSMUSG0000002227  | Mov10         | 0.000996979  | 0.989918691 | 0.996373361 |
| ENSMUSG00000019795 | Pcmt1         | 0.0009696    | 0.989985825 | 0.996373361 |
| ENSMUSG00000020491 | 2810021J22Rik | -0.000740726 | 0.989527768 | 0.996373361 |
| ENSMUSG00000024527 | Afg3l2        | -0.001148268 | 0.988867598 | 0.996373361 |
| ENSMUSG00000027998 | Plrg1         | -0.001263526 | 0.990268151 | 0.996373361 |
| ENSMUSG00000028108 | Ecm1          | -0.000596233 | 0.990517532 | 0.996373361 |
| ENSMUSG00000028145 | Them4         | -0.00091562  | 0.989534619 | 0.996373361 |
| ENSMUSG00000031176 | Dynlt3        | -0.000855969 | 0.990067562 | 0.996373361 |
| ENSMUSG00000032425 | Zfp949        | -0.000819397 | 0.989615113 | 0.996373361 |
| ENSMUSG00000032527 | Pccb          | -0.000889568 | 0.990489383 | 0.996373361 |
| ENSMUSG00000036718 | Micall2       | -0.000810069 | 0.990378979 | 0.996373361 |
| ENSMUSG00000038416 | Cdc16         | -0.000916855 | 0.989729927 | 0.996373361 |
| ENSMUSG00000038816 | Ctnnal1       | 0.000980444  | 0.989941059 | 0.996373361 |
| ENSMUSG00000041040 | Fam117b       | 0.001262164  | 0.989280424 | 0.996373361 |

|                    |            |              |             |             |
|--------------------|------------|--------------|-------------|-------------|
| ENSMUSG00000041920 | Slc16a6    | 0.001027289  | 0.989983361 | 0.996373361 |
| ENSMUSG00000042670 | Immp1l     | -0.000983679 | 0.989367903 | 0.996373361 |
| ENSMUSG00000056758 | Hmga2      | 0.000982783  | 0.988933044 | 0.996373361 |
| ENSMUSG00000059325 | Hopx       | 0.001225525  | 0.990060736 | 0.996373361 |
| ENSMUSG00000061979 | Rcc1l      | 7.04E-05     | 0.989172977 | 0.996373361 |
| ENSMUSG00000092417 | Gpank1     | 0.001117419  | 0.990481276 | 0.996373361 |
| ENSMUSG00000102752 | Gm7694     | 0.000805258  | 0.989151677 | 0.996373361 |
| ENSMUSG00000108381 | Gm9299     | 0.000804669  | 0.990340904 | 0.996373361 |
| ENSMUSG00000024413 | Npc1       | 0.001032134  | 0.99084597  | 0.99662303  |
| ENSMUSG00000041258 | Zfp236     | 0.001104575  | 0.991171754 | 0.996828345 |
| ENSMUSG00000062980 | Cped1      | 0.000801771  | 0.991210602 | 0.996828345 |
| ENSMUSG00000027610 | Gss        | 0.001019865  | 0.991608932 | 0.996877082 |
| ENSMUSG00000028784 | Spocd1     | -0.000604684 | 0.991660351 | 0.996877082 |
| ENSMUSG00000050064 | Zfp697     | -0.000315676 | 0.991379071 | 0.996877082 |
| ENSMUSG00000056665 | Them6      | 0.000881128  | 0.9915454   | 0.996877082 |
| ENSMUSG00000065947 | mt-Nd4l    | -0.000394552 | 0.991600757 | 0.996877082 |
| ENSMUSG00000022951 | Rcan1      | -0.000710452 | 0.992118212 | 0.996943979 |
| ENSMUSG00000026553 | Copa       | 0.001395789  | 0.991946184 | 0.996943979 |
| ENSMUSG00000037151 | Lrrc20     | -0.000739389 | 0.992058741 | 0.996943979 |
| ENSMUSG00000072115 | Ang        | -0.000656283 | 0.991894166 | 0.996943979 |
| ENSMUSG00000078974 | Sec61g     | 0.000439167  | 0.992128212 | 0.996943979 |
| ENSMUSG00000055653 | Gpc3       | -0.000554452 | 0.992211535 | 0.996947054 |
| ENSMUSG00000001403 | Ube2c      | -0.00061609  | 0.992686432 | 0.997151886 |
| ENSMUSG00000026817 | Ak1        | 0.000438959  | 0.992632316 | 0.997151886 |
| ENSMUSG00000029427 | Zcchc8     | 0.000944636  | 0.992736512 | 0.997151886 |
| ENSMUSG00000050714 | Zbtb26     | 0.000711831  | 0.992555554 | 0.997151886 |
| ENSMUSG00000005609 | Ctr9       | 0.000322567  | 0.992990359 | 0.997233003 |
| ENSMUSG00000005893 | Nr2c2      | -0.000424422 | 0.994021561 | 0.997233003 |
| ENSMUSG00000022973 | Synj1      | -0.000323315 | 0.993692075 | 0.997233003 |
| ENSMUSG00000023143 | Nagpa      | 1.75E-05     | 0.993643403 | 0.997233003 |
| ENSMUSG00000032514 | Ttc21a     | 0.000508486  | 0.993214533 | 0.997233003 |
| ENSMUSG00000032606 | Nicn1      | -0.000324012 | 0.993941919 | 0.997233003 |
| ENSMUSG00000040189 | Ccdc114    | -0.000584346 | 0.993029224 | 0.997233003 |
| ENSMUSG00000041075 | Fzd7       | -0.000200635 | 0.993968341 | 0.997233003 |
| ENSMUSG00000049561 | Olfr95     | 0.000458915  | 0.99328808  | 0.997233003 |
| ENSMUSG00000052137 | Rbm12b2    | -0.000443819 | 0.99372979  | 0.997233003 |
| ENSMUSG00000056671 | Preli2     | 0.0008813    | 0.993085823 | 0.997233003 |
| ENSMUSG00000059183 | Mtfmt      | 0.000819216  | 0.993949233 | 0.997233003 |
| ENSMUSG00000115933 | CT571246.1 | 0.000574774  | 0.993518048 | 0.997233003 |
| ENSMUSG00000117310 | Ptp4a1     | -0.000723755 | 0.993681536 | 0.997233003 |
| ENSMUSG00000117522 | AC087233.2 | -0.000445783 | 0.993759165 | 0.997233003 |
| ENSMUSG00000020492 | Ska2       | 0.000748265  | 0.994137679 | 0.997268948 |
| ENSMUSG00000045106 | Ccdc73     | 0.000432964  | 0.994310997 | 0.997285445 |

|                    |               |              |             |             |
|--------------------|---------------|--------------|-------------|-------------|
| ENSMUSG00000063049 | Ing2          | 0.000793982  | 0.994314705 | 0.997285445 |
| ENSMUSG00000030815 | Phkg2         | 5.11E-05     | 0.994683218 | 0.997574506 |
| ENSMUSG00000029484 | Anxa3         | 0.000881689  | 0.994796005 | 0.99760707  |
| ENSMUSG00000109196 | Gm44715       | -0.000144846 | 0.99495315  | 0.99768411  |
| ENSMUSG00000013275 | Slc41a1       | 0.000646082  | 0.995213772 | 0.997688954 |
| ENSMUSG00000030735 | Gm9755        | -0.00010621  | 0.995359594 | 0.997688954 |
| ENSMUSG00000035439 | Haus8         | -0.000286548 | 0.995280968 | 0.997688954 |
| ENSMUSG00000039018 | Mtg1          | 0.000642566  | 0.995206113 | 0.997688954 |
| ENSMUSG00000058672 | Tubb2a        | -0.000375354 | 0.995075404 | 0.997688954 |
| ENSMUSG00000020430 | Pes1          | -0.000113648 | 0.995994698 | 0.998244988 |
| ENSMUSG00000002107 | Celf2         | -0.002017588 | 0.99690654  | 0.998353312 |
| ENSMUSG00000010721 | Lmbr1         | -9.61E-05    | 0.996299711 | 0.998353312 |
| ENSMUSG00000021902 | Phf7          | -0.000300356 | 0.996353664 | 0.998353312 |
| ENSMUSG00000022802 | Lmln          | -6.09E-05    | 0.996899459 | 0.998353312 |
| ENSMUSG00000027206 | Cops2         | 0.000527975  | 0.99689607  | 0.998353312 |
| ENSMUSG00000036403 | Cep135        | -0.000120307 | 0.996518832 | 0.998353312 |
| ENSMUSG00000039934 | Gsap          | -0.000188212 | 0.996431751 | 0.998353312 |
| ENSMUSG00000040749 | Siah1b        | -0.00016554  | 0.996770408 | 0.998353312 |
| ENSMUSG00000048550 | Thns1         | 5.91E-05     | 0.996793054 | 0.998353312 |
| ENSMUSG00000052605 | Isoc2b        | -0.000193077 | 0.996803538 | 0.998353312 |
| ENSMUSG00000029405 | G3bp2         | -0.000877025 | 0.997124626 | 0.998491211 |
| ENSMUSG00000015968 | Cacna1d       | -1.74E-05    | 0.997333102 | 0.998619465 |
| ENSMUSG00000023411 | Nfatc4        | 0.000268551  | 0.997461941 | 0.998644756 |
| ENSMUSG00000026721 | Rabgap1l      | -0.000126085 | 0.997590813 | 0.998644756 |
| ENSMUSG00000062619 | 2310039H08Rik | 0.000125739  | 0.997599559 | 0.998644756 |
| ENSMUSG00000031642 | Sh3rf1        | 0.00026923   | 0.997750959 | 0.998715824 |
| ENSMUSG00000046229 | Scand1        | -9.83E-05    | 0.997860286 | 0.998744771 |
| ENSMUSG00000043019 | Edem3         | 1.62E-05     | 0.998032505 | 0.998836656 |
| ENSMUSG00000027324 | Rpusd2        | 0.000315012  | 0.998383569 | 0.999027013 |
| ENSMUSG00000071650 | Ganab         | -0.005528739 | 0.998367885 | 0.999027013 |
| ENSMUSG00000020078 | Vps26a        | 0.000622466  | 0.998595855 | 0.999158943 |
| ENSMUSG00000005371 | Fbxo11        | 0.000100695  | 0.998837368 | 0.999300808 |
| ENSMUSG00000023034 | Nr4a1         | 8.37E-05     | 0.999078203 | 0.999300808 |
| ENSMUSG00000025645 | Ccdc51        | 3.52E-05     | 0.999300808 | 0.999300808 |
| ENSMUSG00000028136 | Snx27         | 0.000183261  | 0.999271314 | 0.999300808 |
| ENSMUSG00000041827 | Oasl1         | 0.00010913   | 0.999055054 | 0.999300808 |
| ENSMUSG00000046691 | Chtf8         | 0.000108858  | 0.999252982 | 0.999300808 |
| ENSMUSG00000047710 | Champ1        | 6.40E-05     | 0.998971826 | 0.999300808 |
